# Supplementary material for: Genetic control of the transcriptional response to active tuberculosis disease and treatment
Source: Research Square preprint supplement (doi:10.21203/rs.3.rs-7311967/v1), 2025-08-29
Supplement: Supplementary file 2 [file 451bb1370822f1a3912203b4.xlsx]

## Sheet: Contents
Genetic control of the transcriptional response to tuberculosis disease and treatment
John F. O'Grady, Alexander S. Leonard, Houcheng Li, Lingzhao Fang, Hubert Pausch, Isobel C. Gormley, Stephen V. Gordon, David E. MacHugh*
* Corresponding author: David E. MacHugh
Corresponding author email address:			david.machugh@ucd.ie
Supplementary data
Worksheet 13		TensorQTL results for T0, related to Figure 4 and S6-9
Worksheet 14		TensorQTL results for T1, related to Figure 4 and S6-9
Worksheet 15		TensorQTL results for T2, related to Figure 4 and S6-9
Worksheet 16		TensorQTL results for T3, related to Figure 4 and S6-9
Worksheet 17		TensorQTL results for T4, related to Figure 4 and S6-9

## Sheet: TableS13
Table S13: Cis-eQTL results for T0 timepoint from TensorQTL permutation analysis with significant cis-eGenes (FDR < 0.1) labelled
phenotype_id	num_var	beta_shape1	beta_shape2	true_df	pval_true_df	variant_id	start_distance	end_distance	ma_samples	ma_count	af	pval_nominal	slope	slope_se	pval_perm	pval_beta	qval	pval_nominal_threshold	pval_adj_BH	is_eGene
ENSG00000227232.5	8	1.00233	6.4981	34.4036	0.056374	1:13868:A:G	-15702	-15702	22	24	0.25	0.0542498	0.436974	0.219395	0.314369	0.313072	0.496715	0.000578184	0.693542	FALSE
ENSG00000238009.6	44	0.99142	15.304	33.1434	0.000455039	1:126108:G:A	-7615	-7615	7	11	0.114583	0.000313151	-0.694994	0.173794	0.0069993	0.00726776	0.0927917	0.000229915	0.129561	FALSE
ENSG00000268903.1	46	1.00117	16.5271	32.7722	0.00383369	1:108030:G:T	-27865	-27865	6	6	0.0625	0.00279329	0.816507	0.253857	0.0610939	0.0612807	0.271841	0.000225821	0.37956	FALSE
ENSG00000269981.1	48	1.00324	18.3383	32.8168	0.000256442	1:108030:G:T	-29935	-29935	6	6	0.0625	0.000158655	0.987599	0.233353	0.00429957	0.00460553	0.0707557	0.000206055	0.0987932	TRUE
ENSG00000239906.1	49	1.0277	19.1091	32.3579	0.0335558	1:139213:A:G	-1126	-1126	23	25	0.260417	0.0269866	-0.48218	0.208855	0.466853	0.465948	0.56363	0.000228081	0.786973	FALSE
ENSG00000241860.7	38	1.0043	19.3383	33.1101	0.0384657	1:191748:G:A	17886	17886	5	5	0.0520833	0.0332569	0.638884	0.28825	0.531947	0.529649	0.586548	0.000196641	0.818972	FALSE
ENSG00000279928.2	30	1.01874	17.5534	33.4426	0.25282	1:133483:G:T	-49213	-49213	31	41	0.427083	0.241906	-0.248218	0.208519	0.993101	0.993744	0.714836	0.000235813	0.998095	FALSE
ENSG00000279457.4	11	1.00119	11.0676	35.6875	0.0180442	1:181481:AG:A	-13930	-13930	10	10	0.104167	0.0192061	0.698644	0.284592	0.179782	0.182077	0.41252	0.000337231	0.575984	FALSE
ENSG00000290385.1	6	0.95636	3.26631	36.7151	0.130321	1:531693:C:T	8765	8765	30	43	0.447917	0.139786	-0.215828	0.142845	0.379662	0.386	0.530864	0.000867437	0.741223	FALSE
ENSG00000237491.10	156	1.02723	25.2694	30.9487	0.00139171	1:809783:C:A	31036	31036	4	6	0.0625	0.000668388	0.791449	0.211943	0.0293971	0.0312089	0.197757	0.000172051	0.27612	FALSE
ENSG00000228794.12	202	1.01752	39.625	31.932	0.0152121	1:847924:T:C	22786	22786	5	8	0.0833333	0.0109925	0.394934	0.147053	0.449655	0.446767	0.554937	0.00010376	0.774835	FALSE
ENSG00000230021.10	201	1.03633	40.1619	32.0572	0.0112282	1:812761:G:A	-15035	-15035	6	8	0.0833333	0.00802429	0.75012	0.266796	0.354865	0.347414	0.513526	0.000114016	0.717015	FALSE
ENSG00000188976.11	167	1.01951	38.8237	30.9417	0.00121947	1:958061:C:CT	-1248	-1248	13	14	0.145833	0.000575336	-0.587037	0.155012	0.0421958	0.0432335	0.233808	0.000107134	0.326456	FALSE
ENSG00000187961.15	170	1.02843	38.8672	30.6517	0.000365538	1:942335:C:G	-18249	-18249	10	11	0.885417	0.000137897	0.724283	0.169228	0.0106989	0.012353	0.124349	0.000112653	0.173623	FALSE
ENSG00000187583.11	178	1.02875	42.5718	31.0299	0.010715	1:958251:A:G	-8231	-8231	8	10	0.895833	0.00667526	0.591174	0.204984	0.361264	0.354171	0.515978	0.000103041	0.720438	FALSE
ENSG00000272512.1	206	1.03165	54.5593	31.6898	5.93073e-05	1:1029460:T:C	31409	31409	6	9	0.09375	2.40991e-05	1.05417	0.216682	0.00219978	0.00265861	0.0508577	8.17475e-05	0.0710105	TRUE
ENSG00000188290.11	212	1.02901	54.8923	31.2973	0.0034266	1:1020217:G:T	20045	20045	8	11	0.114583	0.00195187	0.774191	0.231172	0.161784	0.161396	0.394165	8.00395e-05	0.550356	FALSE
ENSG00000187608.10	201	1.01229	55.4783	31.7456	0.00772158	1:951438:C:CATTTT	-49701	-49701	12	15	0.15625	0.00512239	0.405087	0.135628	0.353465	0.343673	0.512004	7.18798e-05	0.714889	FALSE
ENSG00000231702.2	204	1.04907	58.1703	31.3635	0.0107586	1:1014733:GAAGT:G	6504	6504	7	9	0.09375	0.00700855	0.589785	0.205865	0.452755	0.443464	0.553067	8.45189e-05	0.772224	FALSE
ENSG00000188157.15	199	1.03246	59.439	31.5743	0.00238565	1:1053552:G:C	33432	33432	17	25	0.739583	0.00137223	0.460179	0.132336	0.125587	0.122383	0.359048	7.53842e-05	0.501323	FALSE
ENSG00000131591.18	157	1.03724	41.12	31.0803	0.00832307	1:1143881:G:A	27520	27520	5	7	0.0729167	0.00506932	-0.53099	0.177544	0.279972	0.274244	0.472639	0.000111932	0.659926	FALSE
ENSG00000223823.1	136	1.03294	39.0518	32.1981	0.000280615	1:1132485:A:C	-4532	-4532	21	31	0.322917	0.000150893	0.612976	0.144254	0.00769923	0.00926415	0.106106	0.000115033	0.148152	FALSE
ENSG00000186891.14	212	1.04884	45.0681	31.1675	0.00468197	1:1219159:G:A	12567	12567	11	12	0.125	0.00270379	-0.868399	0.268975	0.170983	0.17261	0.403753	0.000108938	0.563743	FALSE
ENSG00000186827.12	224	1.02959	48.0491	31.7644	0.0160558	1:1211917:G:A	-2236	-2236	9	10	0.104167	0.0114354	-0.782359	0.293057	0.538146	0.526737	0.58645	9.17379e-05	0.818836	FALSE
ENSG00000078808.20	262	1.03398	47.4713	30.4696	0.00417415	1:1223595:A:C	-8436	-8436	4	7	0.0729167	0.00211588	0.319835	0.0963553	0.168183	0.167749	0.39908	9.51972e-05	0.557218	FALSE
ENSG00000176022.7	261	1.0106	48.6211	31.0721	6.12139e-06	1:1232416:C:T	179	179	6	6	0.0625	1.55867e-06	-1.24637	0.216064	0.00019998	0.000271841	0.0107166	8.12026e-05	0.0149631	TRUE
ENSG00000184163.3	255	1.03949	48.2511	30.271	0.01872	1:1236037:C:T	-10685	-10685	25	36	0.375	0.0113797	-0.294366	0.110182	0.581642	0.580665	0.605209	9.66084e-05	0.845027	FALSE
ENSG00000260179.1	261	1.0165	46.3212	30.2205	0.0153464	1:1281170:TGG:T	29836	29836	4	5	0.0520833	0.00901048	-1.0602	0.383365	0.505849	0.503628	0.576673	8.82377e-05	0.805184	FALSE
ENSG00000160087.21	212	1.02661	45.7397	30.7652	0.00265235	1:1288005:G:C	14141	14141	19	23	0.239583	0.00133362	0.291984	0.0837189	0.10489	0.106861	0.339909	9.47407e-05	0.4746	FALSE
ENSG00000230415.1	208	1.00776	46.4013	31.4459	0.0798	1:1274256:A:G	-967	-967	17	22	0.229167	0.06436	0.408858	0.214066	0.977002	0.978564	0.711977	8.36684e-05	0.994104	FALSE
ENSG00000162572.21	205	1.02114	40.8987	30.5092	0.00723425	1:1306584:G:A	26148	26148	16	19	0.197917	0.00398033	-0.623257	0.202148	0.250175	0.247805	0.459265	0.000102665	0.641252	FALSE
ENSG00000169972.13	213	1.00367	38.1411	31.3152	0.00169976	1:1308178:GGGGCGCGGG:G	-419	-419	30	39	0.40625	0.000898766	-0.275874	0.0760143	0.0627937	0.0621007	0.272952	9.93366e-05	0.381111	FALSE
ENSG00000131584.19	212	1.0016	36.2777	30.7085	0.0242078	1:1260440:T:C	-49169	-49169	5	6	0.0625	0.0160175	-0.425483	0.168101	0.591841	0.588218	0.606814	0.000103152	0.847268	FALSE
ENSG00000127054.22	307	1.00409	35.6926	29.9914	0.0516444	1:1312199:T:TGGGGG	-12489	-12489	21	26	0.270833	0.0353091	0.2514	0.114815	0.843816	0.848357	0.681627	0.000106417	0.951727	FALSE
ENSG00000224051.7	308	0.984272	41.6439	31.9919	0.00901521	1:1281170:TGG:T	-43586	-43586	4	5	0.0520833	0.00627042	0.517706	0.178002	0.328567	0.321573	0.502481	8.08444e-05	0.701593	FALSE
ENSG00000169962.5	307	1.01086	39.8436	30.7382	0.000689769	1:1353987:CTG:C	22707	22707	16	16	0.833333	0.00028929	-0.897896	0.223007	0.0234977	0.0259614	0.181445	9.92403e-05	0.253344	FALSE
ENSG00000107404.21	299	0.996145	36.1216	30.8315	0.00662375	1:1384749:C:G	35331	35331	4	7	0.0729167	0.0037836	0.518958	0.167277	0.215778	0.214982	0.439456	0.000100245	0.613594	FALSE
ENSG00000162576.17	307	0.998668	35.5403	30.7714	0.0309788	1:1337898:A:G	-23879	-23879	20	23	0.760417	0.021277	-0.467679	0.193948	0.671533	0.673734	0.632586	0.000103451	0.883253	FALSE
ENSG00000175756.14	349	1.00199	36.7752	30.6304	0.00920517	1:1384546:C:T	9339	9339	23	32	0.333333	0.00532494	0.208929	0.070304	0.290871	0.287391	0.480949	0.000101995	0.671529	FALSE
ENSG00000221978.13	308	0.99855	32.6997	30.6175	0.0040448	1:1361311:C:G	-38024	-38024	14	23	0.760417	0.00209397	0.385046	0.115867	0.124188	0.124569	0.360788	0.000112357	0.503753	FALSE
ENSG00000224870.9	307	1.02336	31.9926	30.0668	0.00119229	1:1352965:A:G	-46550	-46550	10	11	0.885417	0.000464453	1.20175	0.311171	0.0335966	0.0343555	0.208256	0.000132927	0.290779	FALSE
ENSG00000242485.6	306	0.99323	34.111	30.9777	0.00556513	1:1360989:GAC:G	-46304	-46304	19	29	0.697917	0.00318254	0.290222	0.0916218	0.178182	0.17584	0.407092	0.000104289	0.568406	FALSE
ENSG00000272455.1	308	0.995247	33.7199	30.6509	0.0104776	1:1360901:TAC:T	-48195	-48195	4	7	0.0729167	0.00618232	-0.666128	0.228601	0.307769	0.301134	0.489966	0.000106801	0.684119	FALSE
ENSG00000215915.10	223	1.01478	28.8612	30.1764	0.00975481	1:1495205:G:A	45516	45516	7	7	0.0729167	0.00532939	1.06707	0.359105	0.243576	0.24014	0.454146	0.000140184	0.634105	FALSE
ENSG00000160072.20	182	1.03304	28.9449	30.0504	0.020345	1:1495357:G:A	23592	23592	10	13	0.135417	0.0121898	0.579383	0.219159	0.440856	0.43255	0.548275	0.000155262	0.765533	FALSE
ENSG00000197785.14	217	1.02228	41.7932	30.071	0.0478279	1:1550173:CA:C	38011	38011	14	16	0.166667	0.0325658	-0.418482	0.188015	0.863314	0.866339	0.6866	0.000101133	0.958671	FALSE
ENSG00000205090.9	233	1.03261	44.6747	30.2616	0.000238985	1:1549973:C:CA	9349	9349	17	20	0.208333	7.64721e-05	0.651153	0.145371	0.00739926	0.0090338	0.104332	0.000100373	0.145675	FALSE
ENSG00000215014.5	289	1.01377	53.7249	30.1775	0.0170806	1:1573429:CAAAAAAAAA:C	-673	-673	31	45	0.53125	0.01013	0.509879	0.187551	0.59844	0.597596	0.609885	7.48738e-05	0.851556	FALSE
ENSG00000160075.12	293	1.01592	54.9557	29.9811	0.0224459	1:1553692:A:G	-21171	-21171	28	40	0.583333	0.013537	0.194837	0.0749157	0.705629	0.706855	0.641679	7.4125e-05	0.89595	FALSE
ENSG00000228594.4	289	1.034	59.6662	29.7916	0.00525582	1:1642308:C:T	42173	42173	7	8	0.0833333	0.00245563	0.908635	0.278354	0.255874	0.254968	0.462546	7.57551e-05	0.645833	FALSE
ENSG00000286989.1	288	1.02766	59.7943	29.9868	0.0135513	1:1551454:C:A	-48860	-48860	28	45	0.53125	0.00757433	-0.409299	0.144405	0.546645	0.544944	0.59289	7.29149e-05	0.827827	FALSE
ENSG00000197530.13	283	1.02122	66.6841	30.5501	4.88465e-05	1:1661177:A:G	45723	45723	11	12	0.125	1.35455e-05	0.717335	0.141878	0.00209979	0.00285419	0.053496	6.30034e-05	0.0746942	TRUE
ENSG00000272106.1	284	1.01363	69.1944	31.0376	0.000495283	1:1624323:AT:A	8528	8528	30	38	0.604167	0.000213716	-0.71907	0.174091	0.0288971	0.0319965	0.200061	5.8089e-05	0.279337	FALSE
ENSG00000189409.14	273	1.04131	69.5905	30.1667	0.0202485	1:1607630:T:C	-24533	-24533	18	24	0.75	0.0122933	0.424487	0.160777	0.746725	0.745279	0.654456	6.76788e-05	0.91379	FALSE
ENSG00000248333.9	287	1.03325	81.6538	30.6802	1.22639e-05	1:1659220:A:G	208	208	20	29	0.302083	2.93955e-06	-0.515869	0.092787	0.0009999	0.000784322	0.0215608	5.51261e-05	0.0301044	TRUE
ENSG00000272004.1	285	1.02979	83.6185	30.9844	2.33288e-06	1:1659060:G:A	-265	-265	18	28	0.291667	5.08029e-07	-0.973679	0.158627	0.00039996	0.00014932	0.00681323	5.27827e-05	0.00951303	TRUE
ENSG00000189339.12	358	1.00532	111.213	32.2187	7.0919e-05	1:1659060:G:A	-33735	-33735	18	28	0.291667	3.41939e-05	-0.630412	0.132755	0.00539946	0.00763918	0.0947591	3.44079e-05	0.132308	FALSE
ENSG00000215914.4	366	1.0337	98.955	31.0789	0.00362159	1:1724428:C:CG	24486	24486	4	6	0.0625	0.00200044	-0.967948	0.289808	0.288671	0.286356	0.480566	4.56058e-05	0.670993	FALSE
ENSG00000008128.23	376	1.01144	83.6334	30.847	0.00125428	1:1771047:TAAA:T	46685	46685	18	23	0.239583	0.000582215	0.598861	0.158309	0.0944906	0.0966118	0.326141	4.74456e-05	0.455376	FALSE
ENSG00000227775.3	377	1.01609	79.4203	30.4825	0.0118461	1:1754482:TCCCTGGGAC:T	29970	29970	23	29	0.302083	0.00694347	0.582131	0.202934	0.610539	0.604799	0.612172	5.13454e-05	0.85475	FALSE
ENSG00000290854.1	352	1.00729	64.734	30.2985	0.0165808	1:1706210:G:A	-39782	-39782	9	11	0.114583	0.00994125	-0.870683	0.319379	0.657934	0.658203	0.627219	5.98084e-05	0.875759	FALSE
ENSG00000008130.15	261	0.989261	47.51	30.1894	0.0373016	1:1782430:T:G	1973	1973	3	6	0.0625	0.0247839	-0.180216	0.076827	0.833117	0.838415	0.678665	7.30782e-05	0.947591	FALSE
ENSG00000231050.3	214	0.996592	45.2287	32.2047	0.000535348	1:1881249:A:G	-9974	-9974	22	31	0.322917	0.000304171	0.64359	0.160536	0.0230977	0.0242685	0.174943	8.02768e-05	0.244266	FALSE
ENSG00000078369.19	208	1.0071	42.9575	31.3764	0.0587314	1:1889659:T:TA	-2633	-2633	12	14	0.145833	0.0457173	0.223711	0.107979	0.924308	0.924782	0.699165	9.00215e-05	0.976215	FALSE
ENSG00000169885.10	167	1.00772	31.6704	30.979	0.0104513	1:1878070:C:T	-37038	-37038	18	26	0.270833	0.00644749	0.469155	0.161913	0.283672	0.279574	0.47615	0.000122549	0.664828	FALSE
ENSG00000067606.17	105	1.03882	36.0872	32.9185	0.0378687	1:2060607:C:T	10196	10196	3	5	0.0520833	0.0322043	-0.614719	0.275565	0.741126	0.738506	0.651973	0.000128669	0.910322	FALSE
ENSG00000271806.1	122	1.02343	62.8806	34.4521	0.00328049	1:2151390:G:A	6111	6111	4	7	0.0729167	0.00303897	-0.893263	0.280467	0.181782	0.177908	0.408787	6.76724e-05	0.570772	FALSE
ENSG00000182873.5	107	1.03462	49.2103	32.5077	0.00216191	1:2152298:T:C	-32091	-32091	13	19	0.802083	0.00145187	0.602029	0.174152	0.0920908	0.0920459	0.318708	9.21672e-05	0.444998	FALSE
ENSG00000234396.3	143	1.00102	47.6617	31.8615	0.0148942	1:2189011:G:GA	-23512	-23512	31	43	0.447917	0.0106549	0.458836	0.170049	0.514849	0.510431	0.579343	7.82423e-05	0.808912	FALSE
ENSG00000162585.17	144	1.01779	48.6035	31.3429	2.4323e-05	1:2189294:T:TG	-23426	-23426	17	20	0.208333	8.04492e-06	-0.55384	0.105936	0.00079992	0.00104019	0.0263799	8.47302e-05	0.0368332	TRUE
ENSG00000157933.11	165	1.01099	49.3296	30.7988	0.0570494	1:2268902:G:T	41514	41514	7	9	0.90625	0.042303	-0.256616	0.12176	0.943406	0.943703	0.703159	8.02209e-05	0.981791	FALSE
ENSG00000116151.14	283	1.01045	100.84	32.589	0.0119636	1:2350934:C:T	-40773	-40773	9	10	0.104167	0.00916391	0.808519	0.293071	0.69653	0.698899	0.63905	3.9121e-05	0.892279	FALSE
ENSG00000157916.20	284	1.02721	94.1765	31.6318	0.0369445	1:2350750:AGGGGTGGCA:A	-41025	-41025	11	13	0.135417	0.0280708	0.307514	0.134201	0.968103	0.969497	0.70974	4.61803e-05	0.99098	FALSE
ENSG00000157911.11	204	1.01306	83.9614	32.8992	0.0103556	1:2386420:G:GT	-27377	-27377	4	5	0.0520833	0.00815716	0.686734	0.244818	0.580442	0.576792	0.6036	4.77133e-05	0.84278	FALSE
ENSG00000149527.18	158	1.03595	65.7821	32.1192	0.00418202	1:2419005:C:T	-6975	-6975	10	15	0.15625	0.00277471	-0.522792	0.162413	0.229177	0.22597	0.444933	6.94749e-05	0.621241	FALSE
ENSG00000157881.16	135	1.01361	22.2351	29.6342	0.00897708	1:2510396:T:TCCGATCGGC	-16201	-16201	3	5	0.0520833	0.00446563	-0.678782	0.22333	0.178182	0.176651	0.407778	0.0001807	0.569363	FALSE
ENSG00000157873.18	172	0.998755	20.4865	30.5175	0.0024379	1:2545919:T:A	-9720	-9720	27	39	0.59375	0.00115715	0.211072	0.0596448	0.0455954	0.0489828	0.247834	0.000179558	0.34604	FALSE
ENSG00000238164.6	169	1.02334	21.028	30.3561	0.0329196	1:2531379:T:C	-25652	-25652	27	35	0.635417	0.0218545	0.394947	0.164567	0.49655	0.494324	0.573882	0.00020217	0.801287	FALSE
ENSG00000228037.1	145	0.976192	16.4939	32.027	0.0246875	1:2548807:CA:C	-32753	-32753	25	36	0.625	0.0187867	0.412585	0.16743	0.349465	0.349194	0.514023	0.000194134	0.717709	FALSE
ENSG00000157870.17	138	0.981755	13.4195	32.2538	0.0930009	1:2547072:T:A	-39419	-39419	21	30	0.6875	0.0799661	-0.248837	0.137995	0.730927	0.73652	0.651667	0.000247074	0.909895	FALSE
ENSG00000142606.16	89	0.951702	5.31581	33.8563	0.0446832	1:2602648:C:T	-30368	-30368	19	25	0.260417	0.0411775	0.401438	0.189365	0.236676	0.235417	0.452041	0.00051596	0.631166	FALSE
ENSG00000162591.17	113	1.02382	34.2891	33.4193	0.00180408	1:3631885:A:G	20377	20377	10	13	0.864583	0.00139964	-0.591614	0.170485	0.0540946	0.055615	0.261162	0.000124356	0.364649	FALSE
ENSG00000238260.3	114	1.02148	36.1431	33.0816	2.87167e-05	1:3579171:C:G	-45615	-45615	4	5	0.0520833	1.67211e-05	-1.43898	0.288588	0.00039996	0.000887091	0.0235775	0.000116398	0.0329202	TRUE
ENSG00000158109.15	115	1.03633	38.0587	33.5035	0.0353274	1:3631885:A:G	6870	6870	10	13	0.864583	0.0314169	-0.434824	0.193966	0.732527	0.733047	0.650766	0.000120313	0.908637	FALSE
ENSG00000116213.16	85	1.01792	30.2476	33.8247	0.00133983	1:3629700:CCGGG:C	-23061	-23061	25	34	0.354167	0.00110106	0.530394	0.149127	0.0340966	0.0372413	0.216301	0.000136234	0.302013	FALSE
ENSG00000227372.12	177	1.03144	50.4434	31.5839	0.0102168	1:3786770:G:A	39397	39397	8	10	0.104167	0.00681426	0.67576	0.23497	0.388761	0.389165	0.531612	8.83098e-05	0.742268	FALSE
ENSG00000235169.11	253	1.03148	66.7987	31.748	6.22494e-05	1:3738031:C:T	-34718	-34718	6	6	0.0625	2.58626e-05	-1.95828	0.404468	0.00239976	0.00344526	0.0600066	6.67086e-05	0.0837846	TRUE
ENSG00000130764.10	324	1.00392	77.3184	31.6743	0.00766445	1:3845086:A:G	48588	48588	4	7	0.0729167	0.00503071	0.580916	0.194047	0.446455	0.446459	0.5548	4.90784e-05	0.774644	FALSE
ENSG00000169598.17	363	1.03079	100.565	31.9084	0.000302312	1:3830459:C:G	-26808	-26808	3	6	0.0625	0.000152577	-0.794303	0.187092	0.0249975	0.0265373	0.182836	4.41405e-05	0.255286	FALSE
ENSG00000116198.14	363	1.02859	98.2416	31.6989	1.8661e-05	1:3888876:C:T	31480	31480	6	7	0.0729167	6.76754e-06	1.28805	0.243714	0.0009999	0.00151111	0.0346292	4.46207e-05	0.0483513	TRUE
ENSG00000198912.12	188	1.02859	72.0194	32.7124	0.00169083	1:3889510:G:A	-10783	-10783	25	28	0.708333	0.00115701	0.593397	0.16768	0.106089	0.106643	0.339517	6.08634e-05	0.474054	FALSE
ENSG00000236423.8	188	1.04789	69.6672	32.2004	0.00433843	1:3870415:TG:T	-29932	-29932	9	9	0.09375	0.00292353	1.05219	0.328871	0.246575	0.240885	0.454822	7.01189e-05	0.635049	FALSE
ENSG00000287586.1	88	1.00732	17.1312	32.4652	0.107751	1:4732124:T:C	-2868	-2868	27	42	0.4375	0.0947378	-0.251732	0.146575	0.854815	0.856549	0.684286	0.000225986	0.955439	FALSE
ENSG00000236948.2	21	1.00121	11.4086	34.1185	0.00731944	1:5629642:A:G	-38653	-38653	3	6	0.0625	0.00659031	0.729132	0.252381	0.080292	0.0801144	0.30225	0.000327192	0.422019	FALSE
ENSG00000069424.16	156	1.01116	57.1589	32.9163	0.00397946	1:5993570:T:G	2643	2643	13	19	0.197917	0.00296976	-0.378228	0.118436	0.20028	0.199412	0.427989	6.93036e-05	0.597583	FALSE
ENSG00000131697.18	159	1.03889	55.1629	31.976	0.00269954	1:6011030:T:C	18557	18557	7	7	0.0729167	0.00168515	-1.00513	0.29539	0.123088	0.126351	0.36349	8.42247e-05	0.507526	FALSE
ENSG00000158286.13	191	1.01196	34.3253	30.6079	0.0036997	1:6198087:C:T	-7388	-7388	21	24	0.25	0.00188943	-0.689385	0.205118	0.117988	0.115939	0.351905	0.00011594	0.49135	FALSE
ENSG00000116251.11	201	1.01687	35.9937	30.7001	0.0279112	1:6227843:G:A	18454	18454	5	6	0.0625	0.018785	-0.776665	0.315171	0.637636	0.631887	0.620124	0.000113794	0.865853	FALSE
ENSG00000116237.16	142	1.04034	37.246	31.1861	0.00894173	1:6249259:C:G	13287	13287	28	44	0.458333	0.00557313	0.41086	0.139077	0.265973	0.266537	0.468199	0.000125733	0.653726	FALSE
ENSG00000158292.7	87	1.01424	24.7876	31.8329	0.0120261	1:6219718:G:T	-41380	-41380	10	14	0.145833	0.00840913	0.615154	0.220247	0.253775	0.25295	0.461381	0.000162698	0.644206	FALSE
ENSG00000097021.21	109	0.990285	11.4802	31.0501	0.0804827	1:6436478:T:TTTA	42710	42710	10	13	0.135417	0.0632526	0.422942	0.220471	0.620238	0.622473	0.617647	0.000304397	0.862394	FALSE
ENSG00000187017.18	150	1.04652	29.2516	30.6106	3.32018e-05	1:6433403:T:C	8627	8627	14	19	0.197917	8.90259e-06	0.808021	0.155549	0.00059994	0.000689411	0.0197312	0.000165656	0.0275499	TRUE
ENSG00000215788.11	92	1.02819	25.8051	30.6669	0.0103808	1:6465860:C:T	-315	-315	4	6	0.0625	0.00613138	-0.506065	0.173479	0.227077	0.224427	0.444403	0.000169407	0.620501	FALSE
ENSG00000171680.23	112	1.00413	26.5445	32.1866	0.00892003	1:6524744:A:T	4670	4670	15	18	0.1875	0.00635902	-0.655091	0.225663	0.209379	0.210012	0.435515	0.000143121	0.608091	FALSE
ENSG00000162408.11	134	0.998729	32.8189	32.6177	0.0376067	1:6602853:G:A	48340	48340	20	30	0.3125	0.0311764	0.206067	0.0917823	0.713029	0.716251	0.644888	0.00011207	0.90043	FALSE
ENSG00000204859.13	121	1.01448	33.7164	32.2454	0.0106653	1:6590764:C:T	10770	10770	5	5	0.0520833	0.00777	-0.518915	0.183731	0.30207	0.296767	0.486742	0.000119792	0.679617	FALSE
ENSG00000116273.6	143	0.996055	37.1766	31.5972	7.62852e-05	1:6591390:CA:C	-22341	-22341	22	29	0.302083	3.09445e-05	-0.685058	0.143259	0.00209979	0.00290309	0.0543211	9.73466e-05	0.0758463	TRUE
ENSG00000162413.17	143	1.02551	36.2442	30.8163	0.0358777	1:6583776:CT:C	-30831	-30831	25	32	0.666667	0.0251978	0.218798	0.0935615	0.728527	0.724948	0.648379	0.000118799	0.905305	FALSE
ENSG00000041988.16	144	1.01678	35.4309	30.911	0.0550234	1:6648698:C:T	23830	23830	7	10	0.104167	0.0409965	-0.362126	0.170659	0.862414	0.861723	0.685471	0.00011554	0.957094	FALSE
ENSG00000007923.17	57	0.996311	16.0491	32.4006	0.0549805	1:6659675:T:C	-42249	-42249	5	7	0.0729167	0.0459715	-0.495142	0.239288	0.59804	0.59812	0.610028	0.000225847	0.851757	FALSE
ENSG00000237436.1	42	1.0127	12.399	32.778	0.058821	1:6828286:C:CT	43443	43443	7	8	0.0833333	0.0507653	0.655654	0.324102	0.523448	0.52255	0.585049	0.000322231	0.816878	FALSE
ENSG00000171735.20	42	1.01326	12.5795	32.9418	0.099428	1:6790865:A:G	5411	5411	4	6	0.0625	0.0893044	0.379045	0.216896	0.730327	0.727566	0.649109	0.000318652	0.906324	FALSE
ENSG00000049245.13	102	1.0066	37.7323	33.3682	0.0180411	1:7806023:G:A	34727	34727	3	6	0.0625	0.0154039	0.298294	0.117099	0.49675	0.493725	0.573842	0.000102182	0.801231	FALSE
ENSG00000049246.15	119	1.02047	40.2791	33.0407	0.00137032	1:7799604:C:CT	15313	15313	3	5	0.0520833	0.000981683	1.01359	0.281728	0.0479952	0.0501971	0.250249	0.000103841	0.349412	FALSE
ENSG00000236266.1	167	1.02583	52.6658	33.3822	0.0186532	1:7854006:G:C	26664	26664	5	5	0.0520833	0.0159726	-0.982136	0.387845	0.623338	0.617947	0.616275	8.19176e-05	0.860479	FALSE
ENSG00000049247.14	167	1.02408	47.3783	32.427	0.0081743	1:7889263:C:CAA	35748	35748	3	5	0.0520833	0.00597342	0.826872	0.282469	0.316968	0.311019	0.495858	9.01454e-05	0.692346	FALSE
ENSG00000049249.10	98	1.0264	29.8783	32.6231	0.00993501	1:7961718:T:C	18553	18553	32	38	0.395833	0.00754646	-0.515324	0.181719	0.248175	0.246614	0.459056	0.000144835	0.64096	FALSE
ENSG00000116288.13	110	1.00527	32.2283	32.4361	0.0151673	1:7919353:T:C	-34938	-34938	7	7	0.0729167	0.0116058	-0.73426	0.27566	0.392361	0.386396	0.531083	0.000118687	0.741528	FALSE
ENSG00000284747.1	93	1.04158	23.8677	31.0427	0.0358533	1:8024153:C:T	33019	33019	10	12	0.125	0.0257248	0.617904	0.265245	0.570943	0.563053	0.599673	0.000197502	0.837298	FALSE
ENSG00000116285.13	55	1.03309	15.2971	31.8089	0.0344251	1:7991181:A:G	-35128	-35128	3	5	0.0520833	0.0264062	-0.656149	0.283045	0.405059	0.399128	0.535411	0.000293699	0.747572	FALSE
ENSG00000162426.16	53	0.987693	18.3635	31.5604	0.0493373	1:8298682:C:T	-19432	-19432	5	5	0.0520833	0.0383025	0.864014	0.401331	0.612239	0.610477	0.614136	0.000187279	0.857492	FALSE
ENSG00000232912.6	121	0.976043	37.3878	31.9214	0.00513891	1:8397563:G:T	-27082	-27082	11	15	0.15625	0.00336787	0.336535	0.106961	0.184382	0.184249	0.414573	8.55337e-05	0.57885	FALSE
ENSG00000142599.20	49	1.03883	24.0062	33.9507	0.00608781	1:8883777:G:A	34856	34856	5	8	0.0833333	0.00534153	-0.410942	0.138336	0.121388	0.124358	0.36057	0.000193374	0.503448	FALSE
ENSG00000074800.16	74	1.0351	39.4758	33.7915	0.00111764	1:8922669:C:A	43479	43479	7	12	0.125	0.000907637	0.345345	0.0952482	0.0357964	0.0381214	0.21866	0.000115196	0.305305	FALSE
ENSG00000232208.2	121	1.03552	54.8363	34.0634	0.00046333	1:8885004:C:T	-22740	-22740	3	6	0.0625	0.000385835	-0.686256	0.174771	0.019798	0.0216894	0.166077	8.31358e-05	0.231886	FALSE
ENSG00000131686.15	138	1.05287	59.8433	32.7291	0.00202535	1:8908291:T:C	-37576	-37576	8	13	0.135417	0.00140651	0.752355	0.216916	0.0966903	0.0997377	0.330382	8.38878e-05	0.461298	FALSE
ENSG00000290109.1	117	1.0572	49.1459	32.7771	0.0465463	1:8951663:G:T	-19581	-19581	6	8	0.0833333	0.0396117	0.539022	0.252162	0.891111	0.894217	0.691665	0.000104573	0.965742	FALSE
ENSG00000142583.18	103	1.02819	27.8902	31.9625	0.0106305	1:9102126:T:G	13648	13648	33	46	0.520833	0.00747225	0.499331	0.175838	0.244076	0.245684	0.458632	0.00015675	0.640369	FALSE
ENSG00000180758.12	62	1.01276	27.21	33.3308	0.0595451	1:9101609:T:C	-27493	-27493	30	37	0.614583	0.0534293	-0.41996	0.210093	0.808819	0.808292	0.670497	0.000146938	0.936186	FALSE
ENSG00000234546.5	26	1.00686	11.5889	34.1491	0.0803812	1:9188077:A:G	6073	6073	5	8	0.0833333	0.0766536	0.427752	0.234474	0.618538	0.618438	0.616408	0.000333103	0.860664	FALSE
ENSG00000049239.13	137	0.993311	50.8461	33.5707	0.00597378	1:9279146:A:G	44372	44372	4	7	0.0729167	0.00498547	-0.586572	0.195709	0.266473	0.265587	0.467304	6.99975e-05	0.652477	FALSE
ENSG00000171621.14	196	1.02983	57.0242	32.879	0.00231968	1:9259945:G:T	-32949	-32949	24	33	0.34375	0.00166631	0.505342	0.148332	0.117988	0.115199	0.350717	7.74092e-05	0.489691	FALSE
ENSG00000171612.7	39	1.00385	9.03256	32.5446	0.0398758	1:9534611:A:C	-4854	-4854	4	6	0.0625	0.0329837	0.693184	0.31223	0.312269	0.305838	0.492978	0.000419779	0.688324	FALSE
ENSG00000188807.13	100	1.01909	33.4387	31.8643	0.0252421	1:9624712:C:G	35801	35801	13	18	0.1875	0.0189342	0.51012	0.207288	0.571543	0.566008	0.59978	0.000124078	0.837448	FALSE
ENSG00000171608.18	209	1.02747	58.8565	31.0543	0.0194873	1:9638967:A:G	9078	9078	5	5	0.0520833	0.0130551	-0.441536	0.168807	0.678232	0.675151	0.63264	7.39959e-05	0.883328	FALSE
ENSG00000179840.5	252	1.04475	61.4123	29.6257	0.0264849	1:9652993:C:G	-1593	-1593	10	11	0.114583	0.0157354	0.528344	0.208131	0.794421	0.794767	0.666999	7.81704e-05	0.931302	FALSE
ENSG00000231789.4	235	1.03536	56.8926	29.9327	0.00819848	1:9681734:A:G	-5849	-5849	31	47	0.489583	0.00420697	0.470805	0.153751	0.360164	0.357125	0.516832	8.00598e-05	0.721631	FALSE
ENSG00000171603.18	68	1.03818	18.5138	31.3137	0.0575053	1:9848424:C:T	24440	24440	9	10	0.104167	0.0444508	-0.287757	0.138027	0.654635	0.650654	0.62513	0.000249765	0.872843	FALSE
ENSG00000178585.15	103	1.03487	36.8812	32.1029	0.00644441	1:9927678:CT:C	17342	17342	5	6	0.0625	0.00442258	-0.695258	0.228473	0.20488	0.198449	0.427223	0.000123135	0.596514	FALSE
ENSG00000162441.12	126	1.00185	36.164	31.9067	0.121518	1:9955403:C:CAA	11996	11996	6	8	0.0833333	0.104617	-0.440709	0.264513	0.991101	0.990733	0.714517	0.000103631	0.99765	FALSE
ENSG00000173614.14	126	1.04539	36.4752	31.3175	7.4165e-05	1:9955403:C:CAA	11975	11975	6	8	0.0833333	2.76048e-05	-0.72741	0.150917	0.00149985	0.00202639	0.0424868	0.000132045	0.0593225	TRUE
ENSG00000162444.12	120	1.00563	24.6242	30.7598	0.0154467	1:9999815:CT:C	2608	2608	27	34	0.645833	0.0097163	-0.382687	0.139904	0.321368	0.3158	0.498145	0.000155665	0.695539	FALSE
ENSG00000130939.20	95	1.01045	20.0919	30.5111	0.046351	1:9989294:C:T	-43538	-43538	8	9	0.09375	0.0326859	0.460502	0.207046	0.610839	0.610116	0.61402	0.00019629	0.85733	FALSE
ENSG00000054523.20	93	1.02831	26.2592	31.9865	0.0135459	1:10175255:C:T	-35315	-35315	4	7	0.0729167	0.00975245	0.319782	0.11697	0.29817	0.288242	0.481304	0.000166594	0.672024	FALSE
ENSG00000284642.1	217	1.00877	42.8967	31.1686	0.0299554	1:10382798:C:T	-12618	-12618	5	8	0.0833333	0.0213226	0.510873	0.211941	0.720228	0.725575	0.648638	9.10465e-05	0.905666	FALSE
ENSG00000142657.21	219	1.05521	39.6878	29.8197	0.013438	1:10391742:C:T	-6850	-6850	17	21	0.21875	0.00733298	-0.233027	0.081846	0.39606	0.389123	0.531612	0.000128083	0.742268	FALSE
ENSG00000142655.13	148	1.02908	33.3829	32.335	0.0220229	1:10447179:A:G	-25109	-25109	20	28	0.708333	0.0171324	-0.373521	0.149229	0.516848	0.510841	0.579467	0.000131638	0.809085	FALSE
ENSG00000160049.12	148	1.01407	31.852	32.2227	0.0330534	1:10453674:C:CT	-18855	-18855	27	38	0.395833	0.0262332	-0.327389	0.141053	0.655834	0.651424	0.625259	0.000126498	0.873022	FALSE
ENSG00000130940.15	3	1.01011	1.01327	34.9323	0.759334	1:10758328:C:CT	-38322	-38322	9	11	0.114583	0.759105	0.0561063	0.181536	0.761224	0.76175	0.658244	0.00386193	0.919078	FALSE
ENSG00000175262.15	107	1.0267	29.182	32.0512	0.000319685	1:11021823:G:T	39747	39747	23	32	0.666667	0.000167822	-0.715006	0.169711	0.00729927	0.00810693	0.0976809	0.000148544	0.136388	FALSE
ENSG00000120948.19	102	1.04244	26.0824	30.7711	0.000663158	1:10996306:G:C	-16038	-16038	22	31	0.322917	0.000278814	0.482724	0.119515	0.0129987	0.014185	0.132711	0.000181614	0.185299	FALSE
ENSG00000116649.10	206	1.00406	31.4476	31.6698	0.0192327	1:11070522:C:CA	10501	10501	8	9	0.09375	0.0137851	0.553783	0.213545	0.456254	0.455071	0.55951	0.000120758	0.78122	FALSE
ENSG00000226849.1	205	1.04394	27.4274	30.165	0.0218123	1:11034244:GAA:G	-34228	-34228	4	5	0.0520833	0.0133837	-0.909211	0.348968	0.440856	0.43286	0.548275	0.00017416	0.765533	FALSE
ENSG00000171824.14	185	1.01142	21.5024	31.3404	0.0266607	1:11072581:G:T	-27288	-27288	21	33	0.65625	0.0190673	-0.241972	0.0984442	0.437156	0.435185	0.549576	0.000184469	0.767349	FALSE
ENSG00000198793.14	96	1.02299	35.3508	34.0124	0.00919363	1:11282558:C:CTTT	20002	20002	4	5	0.0520833	0.0082211	0.659574	0.235395	0.269573	0.26838	0.4687	0.000120048	0.654426	FALSE
ENSG00000120942.14	88	1.01001	30.8877	33.4264	0.00316606	1:11265502:A:AT	-7698	-7698	13	14	0.145833	0.00252111	-0.508061	0.156108	0.0893911	0.0907614	0.31756	0.000127368	0.443396	FALSE
ENSG00000132879.14	144	1.02533	40.5044	31.356	0.0120644	1:11650504:T:G	-3871	-3871	20	24	0.25	0.00794796	0.434415	0.154302	0.383862	0.376213	0.526591	0.000106199	0.735257	FALSE
ENSG00000116661.11	144	1.0199	41.0228	31.6036	0.0242201	1:11648996:C:CCCAG	-6790	-6790	22	27	0.28125	0.0176242	-0.438397	0.175983	0.625937	0.62578	0.618214	0.000101622	0.863185	FALSE
ENSG00000116663.11	146	1.044	41.6599	30.9068	0.0147915	1:11658138:A:G	-6062	-6062	4	7	0.0729167	0.00942494	-0.279957	0.101893	0.450655	0.4414	0.552039	0.000114733	0.770789	FALSE
ENSG00000162490.7	172	1.01703	67.8898	32.3709	0.00187237	1:11722035:T:C	30325	30325	12	16	0.166667	0.00121469	0.721731	0.204958	0.113489	0.114465	0.350061	6.03954e-05	0.488775	FALSE
ENSG00000116670.16	172	1.03141	67.1374	32.0133	0.000464114	1:11724194:C:T	32383	32383	5	7	0.0729167	0.000249597	-0.570067	0.13982	0.0244976	0.0271469	0.184966	6.63457e-05	0.25826	FALSE
ENSG00000177674.16	148	1.03808	46.5427	31.0528	0.0177943	1:11730327:CCA:C	-5757	-5757	6	7	0.0729167	0.0117945	-0.30674	0.115442	0.556844	0.548989	0.594327	9.93644e-05	0.829833	FALSE
ENSG00000215910.8	236	1.05508	66.964	31.1687	0.00472863	1:11809458:C:G	47671	47671	4	7	0.0729167	0.00273434	0.849622	0.263501	0.249275	0.248202	0.459265	7.5881e-05	0.641252	FALSE
ENSG00000011021.23	235	1.02042	54.4815	31.2402	0.00173905	1:11823477:C:CA	17381	17381	5	8	0.0833333	0.000908669	0.728217	0.200869	0.0839916	0.0854431	0.309995	7.67549e-05	0.432832	FALSE
ENSG00000177000.13	235	1.04915	57.1776	31.2505	0.00207931	1:11809521:T:C	3066	3066	8	14	0.145833	0.0011108	0.458409	0.129002	0.0973903	0.0988033	0.32964	8.60234e-05	0.460263	FALSE
ENSG00000285646.2	293	1.02776	39.7406	30.4687	0.00193815	1:11920392:T:C	12452	12452	7	7	0.0729167	0.000882669	1.32381	0.364117	0.0629937	0.0682698	0.28308	0.000109757	0.395253	FALSE
ENSG00000116685.16	300	1.04163	41.4306	29.9442	0.00144096	1:11922487:T:C	-3941	-3941	13	17	0.822917	0.000562973	-0.377525	0.0994885	0.0491951	0.0506413	0.250369	0.000113857	0.34958	FALSE
ENSG00000083444.17	296	1.03419	44.132	30.2463	0.00794047	1:11922487:T:C	-11718	-11718	13	17	0.822917	0.00425341	-0.454456	0.148615	0.287671	0.281224	0.477208	0.000102519	0.666305	FALSE
ENSG00000116688.18	256	1.0265	56.0905	31.0388	2.41286e-06	1:12011623:A:G	31442	31442	32	39	0.59375	5.40091e-07	-0.777259	0.127046	0.00019998	0.000105685	0.0053241	7.72136e-05	0.00743382	TRUE
ENSG00000116691.11	208	1.01769	43.6381	31.0075	0.0132182	1:12008423:AC:A	-11043	-11043	14	17	0.177083	0.00841601	-0.197966	0.0708874	0.433157	0.431898	0.548182	9.4314e-05	0.765403	FALSE
ENSG00000120949.15	86	1.02651	18.4623	30.6153	0.0106735	1:12039288:A:G	-24015	-24015	10	12	0.125	0.0062823	0.663586	0.228218	0.172683	0.170109	0.401416	0.000234467	0.56048	FALSE
ENSG00000028137.19	244	1.04473	72.4281	31.3753	0.00171808	1:12203760:T:C	36769	36769	24	27	0.28125	0.000920105	-0.290095	0.0801172	0.106389	0.104504	0.337685	6.62779e-05	0.471496	FALSE
ENSG00000048707.15	137	1.00155	44.0159	32.2566	0.0594883	1:12198174:T:C	-31856	-31856	22	27	0.28125	0.0495007	-0.218656	0.107458	0.930107	0.932574	0.700584	8.49928e-05	0.978195	FALSE
ENSG00000162496.9	105	1.03332	49.4191	33.3046	0.00315929	1:12569214:TC:T	-48996	-48996	15	19	0.802083	0.00246934	-0.418477	0.128279	0.134687	0.134002	0.371899	9.11057e-05	0.519267	FALSE
ENSG00000116731.23	41	1.01493	16.4589	33.2361	0.00658153	1:13744377:A:G	44189	44189	4	6	0.0625	0.00527861	0.584362	0.196413	0.10209	0.0989976	0.329835	0.000245973	0.460535	FALSE
ENSG00000171729.14	83	1.02123	18.2886	32.3094	0.0295515	1:15117135:C:G	-35397	-35397	8	10	0.104167	0.0234406	0.563983	0.237987	0.414459	0.412073	0.539956	0.000229622	0.753917	FALSE
ENSG00000228140.2	114	1.04593	52.6428	32.3664	0.00707501	1:15456025:T:C	46592	46592	22	34	0.645833	0.00507364	-0.429548	0.143641	0.291871	0.291016	0.482427	9.17844e-05	0.673592	FALSE
ENSG00000142634.13	115	1.00598	52.0853	32.5978	0.0234943	1:15426220:C:T	16332	16332	19	24	0.25	0.0188492	-0.18416	0.0747759	0.706729	0.707883	0.641827	7.37541e-05	0.896156	FALSE
ENSG00000162438.12	137	1.03963	60.5904	32.6791	0.0576677	1:15427988:T:C	-10454	-10454	11	12	0.875	0.0493617	0.453915	0.222932	0.968503	0.970363	0.710067	7.70014e-05	0.991436	FALSE
ENSG00000132906.18	191	1.03648	44.929	31.4785	0.00129257	1:15490839:G:A	-35695	-35695	20	26	0.270833	0.000685123	0.399565	0.107251	0.0473953	0.0500834	0.249825	0.00010201	0.348819	FALSE
ENSG00000116138.13	192	1.01754	46.8159	32.3448	0.029597	1:15502209:T:C	-24604	-24604	3	6	0.0625	0.0235566	0.543398	0.229506	0.747125	0.749095	0.655386	8.78368e-05	0.915087	FALSE
ENSG00000116771.6	172	1.03218	44.2644	31.4252	0.073224	1:15536072:C:CT	-48979	-48979	6	7	0.0729167	0.0584771	0.36972	0.189013	0.961804	0.963217	0.707975	0.000101056	0.988515	FALSE
ENSG00000235084.3	158	1.02578	44.0243	32.5209	0.00112555	1:15630115:A:G	25518	25518	4	7	0.0729167	0.000722852	-0.864814	0.233319	0.0424958	0.0442694	0.236481	9.79636e-05	0.330189	FALSE
ENSG00000197312.12	160	1.03	41.3185	31.6731	0.00800506	1:15586903:A:T	-30555	-30555	5	7	0.0729167	0.00527561	0.819772	0.275518	0.274673	0.269274	0.469525	0.000106925	0.655578	FALSE
ENSG00000116786.13	92	1.02905	34.4985	31.3188	0.00938002	1:15705396:T:G	21076	21076	3	5	0.0520833	0.00598539	0.413146	0.141173	0.267873	0.264769	0.467024	0.000127361	0.652085	FALSE
ENSG00000162461.8	95	1.01309	30.2132	31.8196	1.59423e-05	1:15732203:CA:C	-4055	-4055	20	22	0.229167	5.93099e-06	-0.789269	0.14812	0.00019998	0.000433404	0.0141089	0.000132593	0.0196996	TRUE
ENSG00000237938.5	95	1.02333	32.6293	32.7096	0.0111851	1:15782810:C:CT	45914	45914	16	23	0.239583	0.008653	0.46241	0.166236	0.30377	0.296555	0.486538	0.000130311	0.679332	FALSE
ENSG00000224321.1	99	1.03023	29.5172	32.9408	0.00453636	1:15744376:C:T	-48420	-48420	4	5	0.0520833	0.00342378	-1.09848	0.349818	0.116888	0.116596	0.352284	0.000149846	0.491879	FALSE
ENSG00000233954.7	126	1.04078	37.4123	31.9507	0.0150318	1:15821130:C:T	11782	11782	3	6	0.0625	0.0108744	-0.802561	0.298348	0.420858	0.412985	0.540317	0.000125482	0.754422	FALSE
ENSG00000178715.8	126	1.02714	42.3626	32.9746	0.0531353	1:15807945:G:A	-20287	-20287	12	14	0.145833	0.0462405	0.639556	0.309484	0.894011	0.896386	0.692173	0.000102602	0.966451	FALSE
ENSG00000065526.13	121	1.00294	43.5874	33.1085	0.00599769	1:15873668:A:G	37573	37573	15	22	0.229167	0.00470685	-0.494218	0.16369	0.235476	0.229422	0.447483	8.65466e-05	0.624801	FALSE
ENSG00000179743.4	127	1.02106	44.3141	32.6861	0.0327445	1:15832212:C:CT	-15935	-15935	4	5	0.0520833	0.0270642	0.959399	0.415787	0.763224	0.764517	0.658899	9.47111e-05	0.919992	FALSE
ENSG00000116809.12	103	1.03806	27.5467	30.9818	0.00284036	1:15976487:G:A	355	355	21	32	0.666667	0.0014983	0.211049	0.0612536	0.0636936	0.0672759	0.281587	0.000167814	0.393168	FALSE
ENSG00000142627.13	78	1.0137	19.5409	32.6568	0.0191585	1:16201723:G:T	45654	45654	25	38	0.395833	0.0152562	0.377994	0.148153	0.313569	0.308479	0.494567	0.000205711	0.690543	FALSE
ENSG00000142632.17	179	1.02575	29.9761	30.595	0.0196923	1:16229387:C:T	16735	16735	22	27	0.28125	0.0125273	0.452917	0.172047	0.444256	0.436694	0.549743	0.000143826	0.767583	FALSE
ENSG00000291077.1	183	1.02539	34.4541	31.4216	0.00284084	1:16261828:T:C	44403	44403	6	8	0.0833333	0.00161982	0.818776	0.239608	0.0883912	0.0870393	0.311788	0.000124883	0.435337	FALSE
ENSG00000288398.1	221	1.01363	39.2766	30.9792	0.030555	1:16198413:C:T	-32922	-32922	4	5	0.0520833	0.0213917	-1.17669	0.488441	0.70313	0.699258	0.639326	0.000102327	0.892664	FALSE
ENSG00000132881.12	234	1.02566	41.8184	30.8474	0.00243029	1:16270503:C:T	33320	33320	3	5	0.0520833	0.00122692	0.987282	0.280657	0.089691	0.0902046	0.316707	0.000103058	0.442205	FALSE
ENSG00000037637.11	191	1.04564	45.9513	30.8365	0.00295769	1:16371428:C:T	18948	18948	4	7	0.0729167	0.00152768	0.671967	0.195427	0.112789	0.113767	0.349395	0.000104974	0.487845	FALSE
ENSG00000055070.17	191	1.03971	47.4672	31.3676	0.0309688	1:16328179:A:T	-24396	-24396	3	6	0.0625	0.0225585	-0.257667	0.107977	0.766223	0.762678	0.658535	9.83241e-05	0.919484	FALSE
ENSG00000157191.20	132	1.00918	41.5123	31.6795	2.21843e-08	1:16468674:C:CTG	27953	27953	18	24	0.75	4.00611e-09	-0.709826	0.0913728	9.999e-05	8.07522e-07	0.000128434	9.4311e-05	0.000179328	TRUE
ENSG00000226029.1	146	1.01882	37.58	31.2291	0.0304426	1:16504530:CT:C	43582	43582	29	34	0.354167	0.0218377	-0.480995	0.200395	0.681732	0.679716	0.633673	0.000110236	0.884771	FALSE
ENSG00000290842.1	140	1.03185	34.9327	30.6781	0.020857	1:16486571:C:T	-12686	-12686	14	18	0.1875	0.0134961	-0.326822	0.125604	0.516548	0.506123	0.577221	0.000127798	0.80595	FALSE
ENSG00000219481.11	11	1.02154	7.81335	33.5945	0.0601156	1:16648598:C:T	35036	35036	20	21	0.21875	0.054929	-0.48934	0.246416	0.374563	0.373921	0.525447	0.000537942	0.733659	FALSE
ENSG00000291072.1	13	0.998966	9.21214	35.1619	0.0505012	1:16648598:C:T	3912	3912	20	21	0.21875	0.0510423	-0.456523	0.225953	0.381762	0.380083	0.528091	0.000399786	0.737351	FALSE
ENSG00000186301.8	13	1.00904	9.36856	34.8981	0.0999243	1:16677039:G:A	31417	31417	3	5	0.0520833	0.0994235	-0.443685	0.262138	0.629037	0.623288	0.617763	0.000417328	0.862556	FALSE
ENSG00000280114.1	22	1.01273	9.64829	33.9012	0.0758999	1:16679951:A:T	-8798	-8798	3	6	0.0625	0.0712412	-0.371282	0.199566	0.531247	0.527264	0.58645	0.000414093	0.818836	FALSE
ENSG00000058453.17	16	0.981193	7.84143	35.3878	0.132408	1:16703492:G:C	-36781	-36781	8	13	0.135417	0.134578	-0.304611	0.198867	0.676932	0.678902	0.63346	0.000421526	0.884473	FALSE
ENSG00000238142.4	61	1.04663	24.8843	32.5248	0.0613749	1:16904518:C:G	14793	14793	3	6	0.0625	0.0521722	0.582091	0.289576	0.780022	0.779295	0.663345	0.000194818	0.9262	FALSE
ENSG00000159363.19	213	1.0234	65.5981	31.9305	0.0180348	1:16971092:T:C	-40836	-40836	15	16	0.166667	0.0132254	-0.398914	0.152822	0.690031	0.687907	0.636051	6.48583e-05	0.888092	FALSE
ENSG00000117118.10	360	1.02298	64.8326	30.8179	0.00722922	1:17062914:C:T	8882	8882	5	7	0.0729167	0.00416647	-0.44983	0.146725	0.370663	0.364222	0.520819	6.54651e-05	0.727197	FALSE
ENSG00000117115.13	272	0.995108	34.7076	30.2739	1.38284e-07	1:17090758:T:C	-28693	-28693	30	48	0.5	1.43143e-08	0.573822	0.0782618	9.999e-05	5.10594e-06	0.000551904	0.000103674	0.0007706	TRUE
ENSG00000159339.13	224	1.01456	61.1551	32.225	0.0123563	1:17336046:A:C	27851	27851	25	35	0.364583	0.00908407	-0.270763	0.0980218	0.528347	0.525637	0.58645	6.60837e-05	0.818836	FALSE
ENSG00000276747.1	344	1.02597	70.316	31.8821	4.90992e-08	1:17407068:T:G	34872	34872	23	28	0.708333	1.07338e-08	-1.01631	0.136782	9.999e-05	2.46313e-06	0.000310623	6.1409e-05	0.000433709	TRUE
ENSG00000179051.14	150	1.01295	30.1055	31.5542	0.0119157	1:17437070:G:C	-2607	-2607	3	6	0.0625	0.00803958	0.444342	0.158082	0.29607	0.29702	0.486942	0.000132958	0.679896	FALSE
ENSG00000159423.17	183	1.03845	56.1343	32.3595	0.0242119	1:18952554:A:G	49830	49830	4	8	0.0833333	0.0190146	0.450715	0.183282	0.739526	0.734089	0.651089	8.25638e-05	0.909088	FALSE
ENSG00000169991.11	129	1.01348	38.2747	33.4729	0.00405445	1:18922622:T:C	-34054	-34054	5	8	0.0833333	0.00328578	0.446051	0.141352	0.143086	0.139587	0.377001	0.000104912	0.52639	FALSE
ENSG00000272084.1	113	1.02487	34.4421	31.6562	0.00772531	1:19121832:C:T	46321	46321	5	6	0.0625	0.00506178	-1.05306	0.352038	0.227777	0.224122	0.444403	0.000124554	0.620501	FALSE
ENSG00000127481.15	159	1.03554	43.9066	31.1529	0.0120576	1:19223265:G:A	12999	12999	15	20	0.208333	0.00773883	0.423522	0.149871	0.39576	0.395849	0.534266	0.000103833	0.745973	FALSE
ENSG00000230424.3	158	1.03975	45.022	31.3469	0.00157646	1:19233469:A:G	23121	23121	5	9	0.09375	0.000831773	0.708731	0.193811	0.0590941	0.0606505	0.270421	0.000103685	0.377578	FALSE
ENSG00000127463.16	186	1.04611	62.75	31.7636	0.00900367	1:19237543:C:T	-14009	-14009	5	6	0.0625	0.00607491	-0.910967	0.311894	0.406059	0.410899	0.539466	7.70833e-05	0.753234	FALSE
ENSG00000053372.5	186	1.03251	62.6489	32.1465	0.00868367	1:19244652:G:A	-7153	-7153	5	8	0.0833333	0.00614463	-0.554945	0.19029	0.406659	0.405264	0.538032	7.15432e-05	0.751232	FALSE
ENSG00000162482.5	229	1.0515	90.0489	32.6476	0.035503	1:19333664:T:C	44894	44894	10	12	0.125	0.0293974	-0.518073	0.228112	0.954605	0.957361	0.706749	5.5341e-05	0.986803	FALSE
ENSG00000053371.13	230	1.03727	90.5964	32.2945	0.00865434	1:19342849:G:T	30705	30705	4	5	0.0520833	0.0062422	-1.19027	0.409002	0.531447	0.527613	0.58645	5.08265e-05	0.818836	FALSE
ENSG00000040487.13	231	1.03835	91.2743	32.2222	0.00300726	1:19361123:T:A	48797	48797	5	5	0.0520833	0.00197414	-0.860382	0.257228	0.226577	0.224406	0.444403	5.07563e-05	0.620501	FALSE
ENSG00000077549.19	285	1.04383	88.1986	31.3199	0.0220959	1:19443608:A:ATTG	-41931	-41931	4	5	0.0520833	0.0154589	-0.486258	0.190997	0.845915	0.850668	0.682309	5.41588e-05	0.952679	FALSE
ENSG00000158747.15	167	1.02492	39.7619	31.668	0.00737754	1:19621479:A:G	24500	24500	33	43	0.552083	0.00482025	-0.499756	0.166026	0.248575	0.244366	0.457938	0.000107927	0.639399	FALSE
ENSG00000158748.4	229	1.0117	55.3667	31.7458	0.00181444	1:19682387:G:T	17512	17512	22	28	0.708333	0.00104792	0.55362	0.154885	0.0912909	0.0926436	0.319626	7.17748e-05	0.44628	FALSE
ENSG00000162542.14	178	1.02996	39.8027	32.0553	0.0450652	1:19789431:C:T	-10514	-10514	9	16	0.166667	0.0361328	-0.41752	0.191591	0.832117	0.832992	0.676933	0.00011097	0.945172	FALSE
ENSG00000169914.6	75	1.02148	12.194	31.9349	0.045808	1:19912367:C:G	29972	29972	10	12	0.125	0.0364186	-0.427382	0.196436	0.431657	0.42528	0.546175	0.000344767	0.762601	FALSE
ENSG00000117215.15	28	1.0081	8.42168	33.2144	0.00214581	1:20167324:G:A	47758	47758	5	6	0.0625	0.00162228	-1.10924	0.324663	0.0161984	0.0173026	0.146491	0.000461657	0.204539	FALSE
ENSG00000162543.6	83	1.00746	16.506	31.8666	0.0182779	1:20158017:GACTA:G	-28079	-28079	5	9	0.09375	0.0133252	0.617007	0.236653	0.264874	0.259254	0.464994	0.000234737	0.649251	FALSE
ENSG00000187980.7	83	1.0015	16.3322	32.0923	0.0256635	1:20151485:G:A	-35033	-35033	3	6	0.0625	0.0197194	0.635137	0.259906	0.346365	0.345272	0.512795	0.000228967	0.715995	FALSE
ENSG00000226664.1	75	1.02077	11.9854	32.0388	0.0212876	1:20304239:G:C	-18948	-18948	10	15	0.15625	0.0160191	0.507486	0.200502	0.224878	0.218923	0.441148	0.00034933	0.615956	FALSE
ENSG00000162545.6	51	1.01872	17.3655	32.2912	0.026425	1:20503067:G:A	16857	16857	4	7	0.0729167	0.0207497	0.529902	0.218781	0.367763	0.363032	0.519506	0.000238335	0.725364	FALSE
ENSG00000090432.7	58	1.00073	19.7101	33.0427	0.00237085	1:20544937:A:AT	36786	36786	20	27	0.28125	0.00175182	-0.361182	0.106588	0.0450955	0.0455916	0.239217	0.000188858	0.334008	FALSE
ENSG00000158825.6	317	1.02877	76.1234	31.4544	0.000204465	1:20611143:G:C	22057	22057	8	13	0.135417	8.84845e-05	0.569547	0.128563	0.0106989	0.0135341	0.129673	5.7642e-05	0.181056	FALSE
ENSG00000158828.8	392	1.02617	95.4384	31.5244	0.00386143	1:20621657:CCT:C	-11801	-11801	4	6	0.0625	0.00231357	-0.462083	0.140606	0.30297	0.296733	0.486742	4.52987e-05	0.679617	FALSE
ENSG00000117242.7	309	1.00244	69.5945	31.0095	0.000310993	1:20649765:CAA:C	-2429	-2429	11	12	0.125	0.000125891	-0.910441	0.211198	0.020298	0.0211933	0.164656	5.40439e-05	0.229902	FALSE
ENSG00000244038.11	256	1.03577	58.6475	30.8173	0.107973	1:20651633:C:CCAT	-9911	-9911	8	13	0.135417	0.0864131	0.199966	0.113342	0.9984	0.998654	0.715955	7.78448e-05	0.999657	FALSE
ENSG00000127483.19	115	1.03005	40.8813	31.6885	0.0383057	1:20750816:C:CT	-36507	-36507	16	23	0.239583	0.0293519	0.264533	0.116441	0.786521	0.788548	0.665686	0.000108099	0.92947	FALSE
ENSG00000075151.24	149	0.990153	41.4045	31.3325	0.00223557	1:21152339:C:CAAAAAAAA	-24946	-24946	28	41	0.427083	0.00122238	0.340381	0.0967243	0.0920908	0.0909856	0.317748	8.43157e-05	0.443658	FALSE
ENSG00000236936.1	238	1.032	86.7628	31.7147	0.000876816	1:21264380:A:T	-1702	-1702	35	44	0.458333	0.000468878	-0.802686	0.208019	0.0652935	0.0665291	0.279801	5.15141e-05	0.390674	FALSE
ENSG00000231105.2	298	1.02307	112.689	32.2673	0.000895178	1:21298066:C:T	4776	4776	17	19	0.197917	0.000537422	-0.794497	0.208477	0.0885911	0.0901065	0.316706	3.76865e-05	0.442203	FALSE
ENSG00000117298.16	179	1.02416	59.9409	31.4808	0.00896461	1:21298066:C:T	-47506	-47506	17	19	0.197917	0.00581982	-0.268268	0.0913278	0.409259	0.405418	0.53816	7.12898e-05	0.75141	FALSE
ENSG00000142794.19	45	1.00777	22.0633	34.5625	2.16978e-06	1:21456630:CATTTGGCAA:C	16502	16502	15	21	0.21875	1.86782e-06	0.827671	0.144977	9.999e-05	4.41717e-05	0.00270208	0.000175949	0.0037728	TRUE
ENSG00000162551.14	218	1.01548	67.9315	31.5803	0.0210581	1:21555905:G:A	46508	46508	9	11	0.114583	0.0150785	-0.331005	0.129489	0.758024	0.759337	0.657742	5.9814e-05	0.918377	FALSE
ENSG00000233431.1	321	1.01534	87.5544	31.1549	0.0311236	1:21608940:G:T	22468	22468	3	5	0.0520833	0.0222178	0.503408	0.210381	0.933107	0.935429	0.701309	4.63718e-05	0.979208	FALSE
ENSG00000076864.21	98	1.01352	40.8689	33.1632	0.0393608	1:21680086:C:T	10729	10729	18	22	0.229167	0.0342163	0.504599	0.228978	0.80332	0.802374	0.669125	9.82773e-05	0.934271	FALSE
ENSG00000090686.16	144	1.03113	41.0819	30.9982	0.0372768	1:21761185:C:T	-22421	-22421	6	9	0.09375	0.0267537	-0.470321	0.203385	0.779622	0.780546	0.663902	0.000108234	0.926978	FALSE
ENSG00000187942.12	167	1.03432	40.573	30.8619	0.0111617	1:21762867:CA:C	-49400	-49400	10	13	0.135417	0.00683219	0.772247	0.268616	0.358764	0.34955	0.514131	0.000111589	0.717859	FALSE
ENSG00000142798.20	55	1.00387	9.86059	31.7317	0.0867901	1:21947568:C:T	10258	10258	4	5	0.0520833	0.0718724	-0.602141	0.324409	0.591741	0.589806	0.607067	0.000384587	0.847621	FALSE
ENSG00000070831.18	254	1.02273	56.8924	30.8234	0.0140466	1:22070505:T:C	17878	17878	9	13	0.135417	0.00880134	-0.505438	0.182147	0.542446	0.542278	0.591694	7.4492e-05	0.826158	FALSE
ENSG00000285752.1	254	1.04043	56.4921	30.534	0.0296625	1:22048315:T:C	-4612	-4612	7	9	0.09375	0.019776	0.697077	0.285394	0.807919	0.806323	0.670086	8.29559e-05	0.935612	FALSE
ENSG00000184677.18	13	0.977273	4.0761	35.4901	0.182058	1:22460806:C:G	31968	31968	3	6	0.0625	0.185149	-0.23633	0.174841	0.562244	0.568891	0.601277	0.000792251	0.839538	FALSE
ENSG00000289692.1	85	1.00961	14.0942	32.1608	0.00102078	1:22678314:T:TACACACACA	41803	41803	7	11	0.114583	0.00060635	-0.760702	0.201854	0.0121988	0.0136689	0.129971	0.000278399	0.181473	FALSE
ENSG00000159189.13	85	0.990291	14.0947	32.1602	0.0292867	1:22645399:A:G	2385	2385	3	6	0.0625	0.022893	0.43061	0.180929	0.352465	0.346845	0.513393	0.00024793	0.716828	FALSE
ENSG00000173369.18	84	1.00605	13.9908	31.7658	0.0215797	1:22644432:T:C	-8330	-8330	7	11	0.114583	0.0157982	0.370125	0.145899	0.265273	0.260412	0.465295	0.000274618	0.649672	FALSE
ENSG00000133216.17	53	1.01751	15.4095	32.7536	0.00416075	1:22724164:C:T	13325	13325	3	5	0.0520833	0.00303892	0.764051	0.239897	0.0561944	0.0588813	0.26746	0.000266688	0.373443	FALSE
ENSG00000004487.18	87	1.00878	12.4429	33.0023	0.11958	1:23038426:T:C	18983	18983	4	7	0.0729167	0.108792	-0.275388	0.167345	0.790121	0.792452	0.666563	0.000313788	0.930694	FALSE
ENSG00000240553.1	88	1.01901	25.0518	31.8847	0.038267	1:23063230:TGG:T	-24829	-24829	5	8	0.0833333	0.0298298	0.602146	0.265883	0.617338	0.615591	0.615606	0.000165521	0.859544	FALSE
ENSG00000169641.15	25	1.00369	9.01707	33.5386	0.0246335	1:23149435:G:T	-28373	-28373	5	7	0.0729167	0.021662	0.581148	0.241773	0.19898	0.199983	0.428416	0.0004201	0.598179	FALSE
ENSG00000261326.4	141	1.00415	21.589	31.3344	0.0286679	1:23330682:A:G	43194	43194	4	7	0.0729167	0.0206473	-0.448102	0.184847	0.466853	0.464322	0.563374	0.000175987	0.786615	FALSE
ENSG00000125944.21	238	1.01734	38.7105	30.4312	0.000784883	1:23299713:G:GC	-44623	-44623	10	14	0.145833	0.000312059	-0.331436	0.0828556	0.0263974	0.0279725	0.187381	0.0001061	0.261632	FALSE
ENSG00000249087.9	198	1.03437	36.4668	30.441	0.017665	1:23380267:G:A	11328	11328	28	42	0.4375	0.0108743	0.453541	0.168601	0.473953	0.461473	0.561638	0.000124183	0.784191	FALSE
ENSG00000125945.15	198	0.998791	37.708	31.2979	0.0700062	1:23382496:T:C	12660	12660	12	15	0.15625	0.0551568	0.50438	0.25424	0.931207	0.935362	0.701306	9.75762e-05	0.979204	FALSE
ENSG00000204219.11	97	0.988345	22.8489	31.806	0.00800137	1:23421503:GA:G	-3245	-3245	14	21	0.21875	0.00537022	0.394131	0.13277	0.174283	0.171934	0.402904	0.000151113	0.562558	FALSE
ENSG00000088280.20	73	1.01526	25.4183	32.6019	0.0443533	1:23505468:A:T	20900	20900	18	26	0.270833	0.0371183	0.339111	0.156482	0.684432	0.678392	0.633324	0.000159612	0.884283	FALSE
ENSG00000007968.7	95	1.02319	32.0041	31.8598	0.0778874	1:23521217:C:G	-10016	-10016	4	7	0.0729167	0.0644269	0.362429	0.189807	0.920008	0.922242	0.698401	0.000132749	0.975148	FALSE
ENSG00000117318.9	56	1.00615	23.907	33.0862	0.0248449	1:23534784:TACAC:T	-24722	-24722	8	8	0.0833333	0.0209587	-0.502176	0.2077	0.455154	0.449027	0.556638	0.00016083	0.77721	FALSE
ENSG00000197880.10	63	1.02648	25.7114	32.389	0.033824	1:23623657:G:A	42162	42162	11	15	0.15625	0.0272931	0.362626	0.157407	0.580842	0.575343	0.603415	0.000168371	0.842523	FALSE
ENSG00000142676.14	73	1.02401	21.845	33.2789	0.0550151	1:23678442:A:G	-13300	-13300	4	6	0.0625	0.0490142	-0.389516	0.190994	0.706429	0.700578	0.639543	0.000195365	0.892966	FALSE
ENSG00000011007.13	67	1.03655	29.152	32.1194	0.000309166	1:23775383:C:CA	31935	31935	5	7	0.0729167	0.000164484	-0.800728	0.189749	0.00509949	0.00743999	0.0938073	0.000157241	0.130979	FALSE
ENSG00000236810.8	89	1.0123	26.766	31.775	0.0032384	1:23826741:A:G	48416	48416	15	23	0.239583	0.0019872	-0.474871	0.142075	0.0823918	0.0802699	0.302335	0.000148972	0.422138	FALSE
ENSG00000057757.10	89	1.00336	25.7594	31.5276	0.122837	1:23816089:A:AT	37670	37670	14	19	0.197917	0.103738	-0.319613	0.191326	0.964404	0.965593	0.708862	0.000146805	0.989754	FALSE
ENSG00000011009.11	105	1.01656	22.9384	30.7512	0.0761048	1:23828727:T:C	37582	37582	12	19	0.197917	0.058202	0.141755	0.0723865	0.833717	0.833158	0.676969	0.000178207	0.945223	FALSE
ENSG00000117308.15	112	0.998012	22.5093	30.87	0.0127045	1:23826231:G:GAA	25450	25450	19	27	0.28125	0.00790966	-0.417931	0.148346	0.248875	0.250948	0.460301	0.000162692	0.642699	FALSE
ENSG00000117305.15	290	1.00454	30.7702	31.2498	0.0669883	1:23846599:CCTTGTTGTC:C	7979	7979	9	15	0.15625	0.0523559	0.210639	0.104874	0.880112	0.880696	0.689057	0.000123771	0.962101	FALSE
ENSG00000179163.12	445	1.02764	46.5142	30.721	0.000126145	1:23885266:C:T	16976	16976	19	29	0.697917	4.20224e-05	0.503031	0.107487	0.0029997	0.00501736	0.0737403	9.37147e-05	0.10296	FALSE
ENSG00000188822.8	445	1.02833	52.601	31.2174	0.0041385	1:23899140:C:T	-14222	-14222	4	7	0.927083	0.00237577	0.505978	0.154424	0.187981	0.185193	0.415019	8.32013e-05	0.579474	FALSE
ENSG00000189266.13	181	1.02515	26.8108	30.9744	0.0508537	1:23983826:G:A	26987	26987	5	7	0.0729167	0.0377427	0.371354	0.17196	0.746225	0.744774	0.654179	0.000160245	0.913402	FALSE
ENSG00000188529.15	116	0.988861	18.46	31.8887	0.0155181	1:23971722:C:T	-9205	-9205	5	7	0.0729167	0.0111773	0.520789	0.194404	0.260874	0.2556	0.462799	0.000187641	0.646187	FALSE
ENSG00000185436.12	139	1.03025	29.0412	31.5524	0.0265063	1:24168685:C:A	-19274	-19274	4	6	0.0625	0.019357	0.672095	0.274148	0.527947	0.52763	0.58645	0.000152318	0.818836	FALSE
ENSG00000001461.17	186	1.03421	41.7615	31.07	0.0133971	1:24432117:A:G	16315	16315	4	5	0.0520833	0.00861121	-0.4195	0.150705	0.420758	0.414167	0.541141	0.000108348	0.755572	FALSE
ENSG00000001460.18	189	1.02471	41.8401	31.0482	0.0541122	1:24433927:C:G	16993	16993	3	5	0.0520833	0.0406901	0.656488	0.308884	0.89641	0.898297	0.692987	0.000102444	0.967588	FALSE
ENSG00000288982.1	197	1.03208	54.222	30.7178	0.0741931	1:24523607:TACACAC:T	47241	47241	5	5	0.0520833	0.056431	-0.954205	0.483625	0.980802	0.983612	0.71319	8.24569e-05	0.995797	FALSE
ENSG00000117602.13	171	1.04107	48.1903	30.6145	0.00629013	1:24473062:G:C	-29289	-29289	35	44	0.458333	0.0034519	0.218096	0.0695225	0.245775	0.244588	0.458022	9.75884e-05	0.639516	FALSE
ENSG00000286061.1	108	1.01168	32.0356	31.4896	0.0146109	1:24502439:G:A	-32961	-32961	10	11	0.114583	0.00998325	-0.658547	0.241715	0.376662	0.370343	0.523913	0.00012402	0.731518	FALSE
ENSG00000133226.19	66	1.01497	11.1444	30.6178	0.00371443	1:24610955:A:G	-20761	-20761	4	7	0.0729167	0.00190127	-0.611454	0.182055	0.0361964	0.0385061	0.219847	0.000363258	0.306963	FALSE
ENSG00000169504.15	60	1.00749	16.0818	33.4904	0.0245595	1:24754031:C:T	8649	8649	4	7	0.0729167	0.0214991	0.550669	0.228786	0.331367	0.326124	0.504647	0.000240969	0.704617	FALSE
ENSG00000229162.1	122	1.03812	36.4639	32.9629	0.0181112	1:24914625:A:G	-46720	-46720	24	37	0.385417	0.0148372	-0.471312	0.183897	0.475652	0.468289	0.564405	0.000126842	0.788055	FALSE
ENSG00000020633.19	123	1.02575	33.8969	32.8844	0.0222005	1:24951960:A:C	-13161	-13161	4	7	0.0729167	0.0182549	-0.465445	0.187957	0.525047	0.520755	0.584335	0.000127197	0.815882	FALSE
ENSG00000233755.1	103	1.00605	17.748	31.6866	0.0034162	1:25098809:A:T	-14311	-14311	8	13	0.135417	0.00207643	0.648074	0.194836	0.0564944	0.0577931	0.265381	0.000216498	0.370541	FALSE
ENSG00000117614.10	63	1.02141	19.8293	32.7136	0.00316528	1:25258506:G:C	26004	26004	6	6	0.0625	0.00225742	1.06633	0.323577	0.0579942	0.0569104	0.263029	0.000212013	0.367256	FALSE
ENSG00000284602.1	63	1.0222	19.9499	32.6315	0.0353522	1:25254891:C:T	22305	22305	7	9	0.09375	0.0292242	1.07701	0.473671	0.507549	0.501857	0.576037	0.000211694	0.804296	FALSE
ENSG00000187010.21	56	1.00693	17.6195	32.3822	0.000292663	1:25235176:G:A	-37217	-37217	10	16	0.166667	0.000164987	-0.652304	0.154615	0.00469953	0.00494595	0.0735894	0.000219218	0.10275	FALSE
ENSG00000117616.18	110	1.00575	17.059	30.8678	0.0103361	1:25336580:C:G	-1633	-1633	19	25	0.260417	0.00627235	-0.378113	0.130011	0.161984	0.160406	0.393302	0.000224839	0.549151	FALSE
ENSG00000183726.11	110	0.993814	17.4209	31.4662	8.76305e-05	1:25361785:A:G	23468	23468	28	36	0.375	3.47176e-05	-0.670528	0.141354	0.00109989	0.00159181	0.036094	0.000204938	0.0503965	TRUE
ENSG00000188672.19	142	1.05262	34.0758	31.5129	0.0138174	1:25435433:A:T	5241	5241	3	5	0.0520833	0.00941422	-0.689014	0.250732	0.356264	0.352751	0.515128	0.000147068	0.719251	FALSE
ENSG00000204178.11	141	1.03181	32.761	31.4892	0.0443378	1:25435433:A:T	4575	4575	3	5	0.0520833	0.0338639	-0.42785	0.193743	0.765823	0.763521	0.658803	0.000136234	0.919858	FALSE
ENSG00000157978.12	110	1.03364	30.9272	31.6922	0.000427001	1:25563141:T:C	19535	19535	30	41	0.427083	0.000211598	-0.424426	0.102671	0.010199	0.0111853	0.116601	0.00014581	0.162805	FALSE
ENSG00000225643.1	135	1.03069	37.0236	32.1173	0.0212715	1:25591961:A:G	10483	10483	7	10	0.895833	0.0161376	0.596239	0.235853	0.538946	0.534678	0.588587	0.000119792	0.821819	FALSE
ENSG00000117643.15	119	1.01928	35.7937	32.3064	0.0214756	1:25606163:AG:A	-10628	-10628	7	10	0.104167	0.0166264	0.348536	0.138553	0.537046	0.531249	0.587295	0.000116045	0.820016	FALSE
ENSG00000162430.18	201	1.01576	47.278	31.1545	0.0118666	1:25811645:C:A	11452	11452	3	6	0.0625	0.007604	0.797938	0.281674	0.424258	0.423639	0.545451	8.60794e-05	0.76159	FALSE
ENSG00000117640.18	173	1.01989	44.1881	31.6309	0.01644	1:25801816:C:T	-16824	-16824	21	31	0.677083	0.011556	-0.403882	0.151528	0.512849	0.50987	0.579233	9.43392e-05	0.808759	FALSE
ENSG00000228172.5	171	1.01689	40.9762	30.9671	0.000494937	1:25817213:A:ATTTTG	-3584	-3584	15	17	0.822917	0.000209977	0.939462	0.227116	0.0162984	0.0186686	0.152378	9.9972e-05	0.212759	FALSE
ENSG00000236528.3	107	1.02082	25.688	31.9014	0.00681903	1:25812565:AACACACAC:A	-47016	-47016	7	9	0.09375	0.00457059	0.81568	0.269159	0.154785	0.15399	0.388458	0.000163125	0.542388	FALSE
ENSG00000182749.6	85	0.987735	17.8002	32.4019	0.0931681	1:25885282:C:T	9574	9574	3	6	0.0625	0.0808246	0.507383	0.282209	0.829017	0.82781	0.675532	0.000193257	0.943217	FALSE
ENSG00000117632.23	81	1.01154	19.2813	32.5965	0.0497815	1:25915915:A:T	8924	8924	20	29	0.302083	0.0419579	-0.259971	0.123132	0.620638	0.621489	0.617519	0.000205855	0.862216	FALSE
ENSG00000158006.14	77	1.03166	27.4096	32.3127	0.0378414	1:25954080:G:A	-44037	-44037	4	6	0.0625	0.0305826	-0.432997	0.192129	0.644136	0.639571	0.621883	0.000162676	0.868308	FALSE
ENSG00000175087.10	56	1.01522	12.534	31.6946	0.0608573	1:26156890:C:T	45725	45725	11	12	0.125	0.0486886	0.494679	0.24219	0.540046	0.537837	0.58996	0.000323485	0.823736	FALSE
ENSG00000142684.9	130	1.03738	23.7661	30.7261	0.00353486	1:26170849:A:C	941	941	21	25	0.739583	0.00183185	-0.443081	0.13139	0.0669933	0.0723967	0.289934	0.000193745	0.404823	FALSE
ENSG00000142675.18	149	1.02593	22.0767	30.8745	0.0314349	1:26128787:T:TCA	-48698	-48698	5	6	0.0625	0.0218525	-0.885698	0.369049	0.49905	0.493713	0.573842	0.000195456	0.801231	FALSE
ENSG00000130695.16	146	1.01968	28.6005	31.5395	0.0469577	1:26271550:A:G	37350	37350	6	9	0.09375	0.0362194	0.321954	0.147811	0.738926	0.740577	0.652521	0.000145556	0.911088	FALSE
ENSG00000142669.15	224	1.02908	51.0483	31.3335	0.00568219	1:26275284:G:GT	-4803	-4803	16	22	0.229167	0.00344124	0.298944	0.0952594	0.244876	0.240013	0.454146	8.6099e-05	0.634105	FALSE
ENSG00000169442.9	262	1.01857	49.3286	30.2372	0.000105178	1:26269589:G:A	-48369	-48369	19	21	0.21875	2.95248e-05	-0.670669	0.139793	0.00369963	0.00465694	0.0711211	8.3865e-05	0.0993033	TRUE
ENSG00000158062.21	262	0.999288	51.9966	30.8972	0.000868097	1:26316125:AT:A	-2238	-2238	21	31	0.677083	0.000388784	-0.282759	0.0720593	0.0428957	0.0442642	0.236481	7.09756e-05	0.330189	FALSE
ENSG00000176092.17	135	0.995898	31.1813	31.5267	0.0263997	1:26359845:T:A	-235	-235	13	13	0.135417	0.0192215	0.666003	0.271334	0.570843	0.567676	0.600799	0.000115953	0.83887	FALSE
ENSG00000176083.18	105	1.00537	24.8526	31.7149	0.00589823	1:26330818:C:T	-43704	-43704	3	6	0.0625	0.00379682	0.781618	0.252048	0.135086	0.135001	0.372365	0.000153996	0.519917	FALSE
ENSG00000117682.18	92	1.01899	31.4208	31.5797	0.0154081	1:26468227:TA:T	35945	35945	17	22	0.229167	0.0106982	-0.401721	0.148972	0.380462	0.376974	0.526723	0.000131967	0.735441	FALSE
ENSG00000225891.2	111	1.03034	39.9591	32.167	0.0435143	1:26451404:ATGTGTGTGT:A	-16610	-16610	9	13	0.135417	0.0351116	-0.477911	0.218013	0.824618	0.8231	0.674133	0.000110775	0.941263	FALSE
ENSG00000198830.11	106	1.02476	38.7357	32.3134	0.0272385	1:26469760:C:T	-2680	-2680	8	8	0.0833333	0.0214828	0.693752	0.288193	0.652235	0.646708	0.623785	0.000110683	0.870964	FALSE
ENSG00000117676.14	128	1.01759	39.5032	31.4326	0.00972428	1:26578547:T:C	48786	48786	8	10	0.104167	0.0063252	0.263688	0.0907692	0.317968	0.312082	0.496481	0.000104123	0.693216	FALSE
ENSG00000117713.21	73	1.01274	15.5297	31.9786	0.0667127	1:26741711:C:T	48475	48475	29	41	0.572917	0.0549144	-0.315671	0.158952	0.654235	0.652595	0.625748	0.000257365	0.873705	FALSE
ENSG00000260063.1	74	1.01287	15.8927	32.1725	0.0234972	1:26723330:C:G	29199	29199	6	6	0.0625	0.0180711	1.08471	0.437276	0.315368	0.308799	0.494653	0.000251681	0.690664	FALSE
ENSG00000060642.12	57	1.01744	19.7997	32.9756	0.0073112	1:26744038:T:C	-43016	-43016	5	7	0.0729167	0.00569881	-0.741576	0.251761	0.127787	0.129753	0.366552	0.000207502	0.511802	FALSE
ENSG00000204160.12	94	0.993609	14.6642	31.1494	0.0129026	1:26835179:C:T	8491	8491	25	37	0.614583	0.00834114	-0.132383	0.0473433	0.176582	0.175742	0.407092	0.000243164	0.568406	FALSE
ENSG00000175793.12	118	1.01041	16.1803	30.8623	0.0467999	1:26835179:C:T	-27970	-27970	25	37	0.614583	0.0340741	0.322701	0.146312	0.538546	0.534735	0.588587	0.000243665	0.821819	FALSE
ENSG00000142751.15	128	0.9873	15.1591	31.5383	0.0165777	1:26910969:G:GT	20686	20686	8	9	0.09375	0.0115383	0.664705	0.249326	0.234077	0.229107	0.44726	0.000226331	0.62449	FALSE
ENSG00000090273.14	119	1.00994	15.7977	31.2696	0.0662236	1:26865790:T:A	-34448	-34448	6	8	0.0833333	0.0517712	-0.306856	0.152379	0.654835	0.657229	0.627179	0.000248874	0.875704	FALSE
ENSG00000198746.13	119	1.01775	15.8764	31.2058	0.0405882	1:26922154:A:G	21687	21687	3	6	0.0625	0.0299698	-0.343066	0.151622	0.478352	0.47361	0.566674	0.000259211	0.791223	FALSE
ENSG00000175707.10	71	0.985452	13.6906	32.8907	0.00433981	1:26919079:C:CT	-41389	-41389	4	6	0.0625	0.00324313	0.652058	0.206313	0.0585941	0.060578	0.270421	0.000247782	0.377578	FALSE
ENSG00000253368.4	54	0.982558	8.27298	33.0098	0.0853498	1:26945207:T:C	-48485	-48485	5	6	0.0625	0.0763421	-0.668016	0.365771	0.528247	0.529979	0.586618	0.000402904	0.81907	FALSE
ENSG00000090020.11	97	1.0144	21.3621	32.6805	0.0193175	1:27147162:T:C	-19819	-19819	3	5	0.0520833	0.0154289	0.334705	0.131427	0.337366	0.33403	0.50801	0.000188953	0.709312	FALSE
ENSG00000142784.16	63	1.00092	17.4739	31.9906	0.113052	1:27278941:G:T	44309	44309	19	31	0.322917	0.097199	0.145062	0.0851181	0.875712	0.876911	0.688314	0.000213267	0.961063	FALSE
ENSG00000243659.1	81	1.01899	32.6591	32.4057	0.0379031	1:27269606:G:GT	-41634	-41634	8	11	0.114583	0.03088	-0.66851	0.297195	0.710029	0.709908	0.642354	0.000126965	0.896891	FALSE
ENSG00000186501.15	85	1.02746	30.8168	31.553	0.021655	1:27281790:G:A	-40355	-40355	13	19	0.197917	0.015503	0.286102	0.11243	0.485851	0.47758	0.568462	0.000141281	0.793719	FALSE
ENSG00000142765.18	100	1.00331	32.9756	31.6781	0.0410239	1:27354486:TG:T	12466	12466	5	5	0.947917	0.0316073	0.668243	0.298446	0.746725	0.747625	0.654748	0.000114649	0.914197	FALSE
ENSG00000142733.18	124	1.0253	36.3272	31.3081	0.0473846	1:27381369:C:A	14408	14408	9	12	0.125	0.0358834	-0.333522	0.152827	0.824818	0.821925	0.673792	0.000118385	0.940787	FALSE
ENSG00000158195.11	138	1.00943	22.4166	30.4188	0.00039073	1:27448842:C:CA	-41326	-41326	10	13	0.135417	0.000140156	0.636884	0.149	0.0079992	0.00830933	0.0994737	0.000174885	0.138891	FALSE
ENSG00000237429.1	85	1.02081	17.0632	30.7501	0.0869404	1:27507578:T:C	-18227	-18227	13	18	0.1875	0.0675476	-0.277461	0.147078	0.779222	0.781936	0.664283	0.000245505	0.92751	FALSE
ENSG00000126705.15	75	1.01661	22.2478	32.5204	0.0683729	1:27631828:C:T	27397	27397	7	7	0.0729167	0.0585221	-0.64767	0.331173	0.788221	0.788201	0.665686	0.00018379	0.92947	FALSE
ENSG00000000938.13	122	1.02773	29.5598	31.2075	0.00776705	1:27630582:GGA:G	-4603	-4603	8	8	0.0833333	0.0047793	0.496336	0.164711	0.192681	0.195067	0.423875	0.000147513	0.591838	FALSE
ENSG00000235912.1	130	1.04834	29.0803	30.6136	0.00264468	1:27671918:T:C	22499	22499	3	5	0.0520833	0.00129245	1.08699	0.310657	0.0606939	0.0641015	0.275972	0.000168311	0.385328	FALSE
ENSG00000233975.2	116	0.999571	26.7624	31.7509	0.00066163	1:27680853:CTTTCTTTT:C	14574	14574	12	15	0.84375	0.000346885	1.02072	0.257527	0.0175982	0.0175902	0.146805	0.00013813	0.204977	FALSE
ENSG00000126709.16	109	1.02016	25.9751	31.3948	0.0109036	1:27633743:A:G	-38469	-38469	18	20	0.208333	0.00714226	-0.404246	0.141469	0.242976	0.239275	0.453851	0.000160708	0.633693	FALSE
ENSG00000009780.16	61	1.00866	16.1643	32.6832	0.0154355	1:27679402:G:A	-46559	-46559	10	12	0.875	0.0121548	0.69346	0.262194	0.227577	0.21881	0.441148	0.000241403	0.615956	FALSE
ENSG00000117758.14	66	1.02788	20.2647	33.2388	0.0765003	1:27755829:C:T	-17390	-17390	4	5	0.0520833	0.0690078	-0.426058	0.227103	0.792221	0.79261	0.666581	0.000215306	0.930718	FALSE
ENSG00000117751.18	103	0.999325	21.1946	31.2901	0.126224	1:27840312:T:A	9530	9530	5	8	0.0833333	0.105525	-0.304073	0.182999	0.943106	0.942791	0.702963	0.000174155	0.981518	FALSE
ENSG00000130775.16	211	1.00085	35.7768	30.3872	0.000931438	1:27882794:A:G	10251	10251	36	40	0.583333	0.000375714	-0.368675	0.093671	0.0311969	0.0326837	0.202241	0.000104126	0.28238	FALSE
ENSG00000117748.10	235	1.00076	50.9885	31.3228	0.000197771	1:27914572:G:A	-174	-174	4	5	0.0520833	8.23605e-05	1.20887	0.271396	0.00849915	0.00999625	0.109755	7.30233e-05	0.153246	FALSE
ENSG00000130768.15	209	1.02244	53.9904	32.0984	0.00114419	1:27912369:T:C	-22631	-22631	32	48	0.5	0.000677823	-0.544837	0.146096	0.0531947	0.0557606	0.261368	7.83636e-05	0.364937	FALSE
ENSG00000158156.9	158	1.01747	50.3571	32.9012	0.0445013	1:27955413:G:A	-4175	-4175	9	10	0.104167	0.0381378	-0.46813	0.217248	0.894811	0.895933	0.692131	8.16279e-05	0.966393	FALSE
ENSG00000227050.1	157	1.0326	52.2132	33.0503	0.0051326	1:27972440:C:T	12247	12247	32	39	0.40625	0.00396231	0.518224	0.167987	0.224178	0.222143	0.443192	8.58811e-05	0.618811	FALSE
ENSG00000158161.16	129	1.03087	45.0631	31.5225	0.023302	1:28096741:A:G	8104	8104	28	35	0.364583	0.0167498	0.466565	0.1857	0.642636	0.641629	0.622677	9.85297e-05	0.869417	FALSE
ENSG00000228589.3	135	1.03502	48.2697	31.6909	0.0316572	1:28131549:CA:C	35127	35127	5	7	0.0729167	0.0238354	-0.695767	0.294491	0.775422	0.777616	0.662859	9.41749e-05	0.925522	FALSE
ENSG00000289576.2	161	1.05372	50.523	31.2347	0.044799	1:28119028:G:A	-7911	-7911	13	19	0.197917	0.033516	-0.309219	0.139731	0.891511	0.892	0.691488	9.98166e-05	0.965496	FALSE
ENSG00000169403.12	109	1.01512	26.8225	32.0744	0.012219	1:28207105:C:T	13169	13169	5	8	0.0833333	0.00881322	-0.508161	0.183164	0.276272	0.274176	0.472639	0.000151135	0.659926	FALSE
ENSG00000126698.11	84	1.01664	27.3987	33.1245	0.00180672	1:28200500:A:G	-32529	-32529	29	39	0.40625	0.00133347	-0.295696	0.0847822	0.0431957	0.0456589	0.239217	0.000149277	0.334008	FALSE
ENSG00000130770.18	85	1.02111	25.9849	32.3054	0.00131867	1:28189292:G:A	-46817	-46817	9	12	0.125	0.000822562	-0.595634	0.162708	0.0291971	0.0311141	0.197606	0.000161533	0.275909	FALSE
ENSG00000290123.1	86	1.01675	26.7086	33.3017	0.0904752	1:28274486:G:C	38047	38047	5	6	0.0625	0.0825366	-0.547764	0.30646	0.915508	0.91821	0.697889	0.000153231	0.974432	FALSE
ENSG00000270605.1	85	1.04342	25.5881	31.7553	0.0231775	1:28274486:G:C	33033	33033	5	6	0.0625	0.0170611	0.776513	0.310016	0.438056	0.430475	0.548182	0.000186129	0.765403	FALSE
ENSG00000130766.5	65	1.01996	23.6935	33.4018	0.0240493	1:28246715:A:G	-12803	-12803	9	10	0.104167	0.0208622	-0.459682	0.18997	0.437356	0.428683	0.5477	0.000175972	0.76473	FALSE
ENSG00000130772.14	76	1.0254	11.9834	32.4046	0.0155708	1:28369881:C:G	40879	40879	3	6	0.0625	0.0118952	0.580788	0.218866	0.166483	0.162486	0.395067	0.000358793	0.551615	FALSE
ENSG00000204138.13	67	1.045	27.2539	33.8898	0.00654849	1:28325609:T:C	-43973	-43973	13	20	0.208333	0.0057135	-0.472499	0.160465	0.147285	0.148597	0.384391	0.0001763	0.536709	FALSE
ENSG00000180198.17	97	1.00998	28.8524	32.5826	0.067525	1:28508074:G:A	2131	2131	6	8	0.0833333	0.0579912	0.573287	0.292488	0.867013	0.864831	0.686325	0.000136326	0.958286	FALSE
ENSG00000180098.9	118	1.01095	28.4239	30.8323	0.0157333	1:28531457:C:G	-21628	-21628	13	20	0.208333	0.0100083	-0.3624	0.133066	0.365163	0.357633	0.516888	0.000139175	0.721709	FALSE
ENSG00000197989.15	94	1.0245	22.2365	31.3063	0.172314	1:28599026:C:T	15894	15894	4	6	0.0625	0.148659	-0.330886	0.224049	0.983102	0.984298	0.71332	0.000192468	0.995979	FALSE
ENSG00000229388.1	57	1.0355	20.8348	33.6459	0.0505426	1:28632548:C:T	-10680	-10680	6	7	0.0729167	0.046057	-0.800718	0.387126	0.648135	0.646218	0.623785	0.000218656	0.870964	FALSE
ENSG00000120656.14	63	1.00063	21.7359	33.9666	0.0134607	1:28611990:T:C	-36301	-36301	26	39	0.40625	0.0121008	0.318736	0.12043	0.253775	0.254872	0.462546	0.000171156	0.645833	FALSE
ENSG00000162419.13	74	1.01618	21.607	32.0529	0.0519363	1:28632548:C:T	-36230	-36230	6	7	0.0729167	0.042116	-0.667912	0.316607	0.676132	0.677808	0.633193	0.000188765	0.884101	FALSE
ENSG00000198492.16	128	1.01474	36.1377	33.0058	0.0420955	1:28717185:G:GT	-19436	-19436	26	35	0.364583	0.0362625	0.399662	0.183532	0.783822	0.784158	0.665043	0.000111938	0.928571	FALSE
ENSG00000289291.1	126	1.01402	34.6173	32.561	0.0136431	1:28718611:A:G	-19059	-19059	29	39	0.40625	0.01051	0.470209	0.173908	0.377362	0.371717	0.524832	0.000116362	0.7328	FALSE
ENSG00000233427.1	162	1.03234	33.3654	31.4014	0.00514439	1:28905231:T:G	27895	27895	4	6	0.0625	0.00311469	1.05367	0.331792	0.150385	0.147133	0.382908	0.00013417	0.534638	FALSE
ENSG00000159023.23	184	1.04539	35.8745	30.7046	0.0110967	1:28862203:T:C	-24888	-24888	20	30	0.3125	0.00664504	0.296338	0.102689	0.314569	0.309008	0.494787	0.000134254	0.690851	FALSE
ENSG00000253304.2	171	1.04027	40.5421	30.2018	0.0168301	1:29118208:A:G	-5695	-5695	14	16	0.166667	0.00999055	-0.58017	0.21297	0.483452	0.47834	0.568601	0.000115471	0.793914	FALSE
ENSG00000116350.18	167	1.04074	45.0479	31.2039	0.000592586	1:29170738:T:C	-11162	-11162	12	18	0.1875	0.000271593	-0.663452	0.163893	0.019698	0.0223378	0.168037	0.0001042	0.234622	FALSE
ENSG00000116353.16	77	1.02634	20.0683	33.6387	0.0339092	1:29193512:G:C	-37430	-37430	4	7	0.0729167	0.0304443	0.489597	0.21705	0.491151	0.487136	0.571655	0.000215508	0.798178	FALSE
ENSG00000186056.11	176	1.02584	63.3676	32.3816	0.0258929	1:30751998:G:C	33494	33494	5	5	0.0520833	0.0204789	-0.678788	0.279606	0.805519	0.802978	0.669255	6.80902e-05	0.934453	FALSE
ENSG00000287510.1	224	1.02883	62.3784	31.9084	0.0169113	1:30733790:C:T	2097	2097	16	18	0.1875	0.0123015	0.59561	0.225615	0.647735	0.64294	0.623036	7.03641e-05	0.869919	FALSE
ENSG00000162511.8	188	1.03277	61.755	32.5605	0.0105241	1:30749071:A:G	-8703	-8703	7	9	0.09375	0.00796363	-0.356971	0.126829	0.469053	0.463958	0.563232	7.26855e-05	0.786417	FALSE
ENSG00000162512.16	127	1.05149	40.6986	31.1407	0.0408987	1:30952979:A:AAAAAC	44220	44220	7	8	0.0833333	0.030049	-0.498349	0.220366	0.806419	0.802986	0.669255	0.000122393	0.934453	FALSE
ENSG00000134644.16	97	1.04258	28.2025	30.9725	0.0119696	1:31033376:CTTTTTTTTT:C	-32615	-32615	5	5	0.0520833	0.00749798	0.825995	0.29101	0.280372	0.269153	0.469461	0.000168103	0.655489	FALSE
ENSG00000060688.13	92	1.03737	44.2174	33.4927	0.0194041	1:31310604:A:G	13816	13816	5	7	0.0729167	0.0168275	-0.411118	0.163758	0.570143	0.562657	0.599564	0.000104171	0.837146	FALSE
ENSG00000121766.16	92	1.03448	44.2058	33.575	0.00612312	1:31260935:T:A	-36047	-36047	8	13	0.135417	0.00511799	0.58693	0.19649	0.222478	0.223502	0.443995	0.000102516	0.619932	FALSE
ENSG00000168528.12	165	1.01971	41.4781	32.4851	0.00186208	1:31409483:T:G	-82	-82	24	34	0.645833	0.00123219	0.445319	0.126648	0.0670933	0.0701286	0.285428	0.000100396	0.398531	FALSE
ENSG00000162517.13	61	0.989138	10.1767	32.3782	0.100968	1:31613040:CCACA:C	-31856	-31856	10	14	0.145833	0.0879576	-0.187163	0.106627	0.662534	0.665785	0.629397	0.000341003	0.8788	FALSE
ENSG00000121753.13	41	0.959169	7.05231	32.9129	0.121332	1:31733498:G:T	-31395	-31395	5	8	0.0833333	0.109978	-0.354967	0.216453	0.607639	0.615779	0.615606	0.000407861	0.859544	FALSE
ENSG00000134668.13	16	0.969513	4.44407	35.3801	0.320424	1:31790485:T:C	-25537	-25537	13	18	0.8125	0.323075	0.207751	0.207273	0.822318	0.827663	0.675495	0.000692198	0.943165	FALSE
ENSG00000184007.22	52	0.965332	16.0984	32.5492	0.00865685	1:31922758:G:A	-22098	-22098	4	5	0.0520833	0.00645364	0.960388	0.331489	0.144186	0.141878	0.379432	0.000185654	0.529785	FALSE
ENSG00000121774.18	6	0.994992	5.42474	35.0254	0.0486687	1:32062027:C:T	48159	48159	13	16	0.166667	0.0487517	-0.321302	0.157353	0.237576	0.239172	0.453851	0.000662906	0.633693	FALSE
ENSG00000121775.18	32	1.02531	13.3098	32.6809	0.0506695	1:32059185:C:A	-12846	-12846	14	21	0.78125	0.0430285	-0.293794	0.139918	0.492451	0.487615	0.57187	0.00032291	0.798478	FALSE
ENSG00000025800.14	81	1.00149	19.7287	32.145	0.0705654	1:32117626:G:A	9570	9570	13	20	0.208333	0.0590201	0.296471	0.151909	0.762124	0.76347	0.658803	0.000189542	0.919858	FALSE
ENSG00000084652.16	113	0.994841	20.7689	31.6101	0.0746726	1:32134093:T:A	-45582	-45582	3	5	0.0520833	0.0605128	-0.550912	0.284024	0.80022	0.80196	0.669094	0.000172975	0.934227	FALSE
ENSG00000160050.16	124	1.0016	22.2101	30.9374	0.0680888	1:32233123:G:A	32528	32528	3	6	0.0625	0.0520987	-0.533954	0.265542	0.787921	0.79069	0.666083	0.000168479	0.930023	FALSE
ENSG00000160051.12	120	0.991136	22.4383	31.3095	0.061793	1:32160299:C:CA	-45372	-45372	16	18	0.1875	0.0481051	0.49708	0.242697	0.761924	0.763877	0.65889	0.000156533	0.91998	FALSE
ENSG00000224066.1	117	1.01252	22.9322	30.735	0.0036805	1:32195999:CT:C	-10815	-10815	8	9	0.09375	0.0019203	0.927319	0.276401	0.0763924	0.0781924	0.298876	0.000174093	0.417307	FALSE
ENSG00000084623.12	118	1.00186	24.7268	31.1362	0.13742	1:32173456:G:C	-47621	-47621	10	11	0.114583	0.11495	0.279255	0.172745	0.975902	0.974049	0.710873	0.000151569	0.992562	FALSE
ENSG00000160055.20	118	1.01972	23.7529	30.4408	0.0195513	1:32210325:T:TA	-12034	-12034	6	8	0.0833333	0.0122025	0.305041	0.115404	0.371863	0.364981	0.521003	0.000175288	0.727454	FALSE
ENSG00000183615.6	113	1.02147	25.9419	31.144	0.00768149	1:32240217:G:A	-7005	-7005	11	17	0.177083	0.00467784	0.663546	0.219601	0.177382	0.173418	0.404261	0.000162137	0.564452	FALSE
ENSG00000182866.18	110	1.00072	25.7876	31.9408	0.033958	1:32258479:T:TA	7235	7235	4	5	0.0520833	0.0263306	-0.330729	0.142591	0.591241	0.589396	0.607067	0.000144344	0.847621	FALSE
ENSG00000116478.12	58	1.01454	15.8597	32.5113	0.00293071	1:32257345:T:G	-34738	-34738	6	9	0.09375	0.00201288	0.567195	0.169937	0.0408959	0.0432409	0.233808	0.00025468	0.326456	FALSE
ENSG00000175130.7	20	0.990982	7.81706	34.8585	0.133686	1:32365942:C:T	29709	29709	9	9	0.90625	0.132888	0.477859	0.310575	0.675332	0.677757	0.633193	0.000448992	0.884101	FALSE
ENSG00000233775.1	11	1.00646	5.84449	34.6254	0.032226	1:32382697:C:CA	32034	32034	4	5	0.0520833	0.0312939	-1.06271	0.473685	0.172583	0.171943	0.402904	0.000658662	0.562558	FALSE
ENSG00000162526.7	12	0.978097	6.22628	34.7852	0.175786	1:32365982:C:T	14461	14461	9	9	0.09375	0.174439	-0.606447	0.437473	0.69783	0.707767	0.641827	0.000520921	0.896156	FALSE
ENSG00000225828.2	17	0.985683	7.48572	34.3203	0.0503745	1:32366691:A:G	2413	2413	5	6	0.0625	0.0481176	0.60158	0.293736	0.330267	0.327418	0.505373	0.000453957	0.705631	FALSE
ENSG00000160058.19	42	0.999326	8.73204	33.147	0.0287022	1:32382697:C:CA	-12034	-12034	4	5	0.0520833	0.0245282	0.801495	0.341029	0.230077	0.224811	0.444514	0.000422673	0.620656	FALSE
ENSG00000176261.16	149	0.998948	18.9058	31.3456	0.0318938	1:32681578:A:T	30675	30675	5	6	0.0625	0.0232541	-0.482475	0.203297	0.460854	0.458677	0.560949	0.000194795	0.783229	FALSE
ENSG00000162521.19	149	1.00252	20.0562	31.9514	0.0109437	1:32663925:AT:A	12783	12783	10	12	0.125	0.00770114	-0.428157	0.151408	0.19718	0.197063	0.425619	0.0001876	0.594274	FALSE
ENSG00000162520.15	130	1.01047	16.1337	32.263	0.0338439	1:32684997:T:C	-18599	-18599	10	10	0.895833	0.0270065	0.694093	0.300686	0.424058	0.421178	0.544361	0.000244455	0.760068	FALSE
ENSG00000162522.11	60	0.993691	20.6307	33.7238	0.0516813	1:32780576:T:A	38746	38746	6	7	0.0729167	0.0473916	-0.563961	0.27442	0.663834	0.667919	0.630685	0.000172922	0.880598	FALSE
ENSG00000116497.18	135	1.02886	40.1682	31.3218	0.00299493	1:32817927:G:A	1160	1160	4	7	0.0729167	0.00168791	-0.809187	0.237846	0.106789	0.105404	0.338429	0.000109273	0.472534	FALSE
ENSG00000134684.13	133	1.03119	38.8743	30.9583	0.0161697	1:32838995:G:A	20964	20964	17	26	0.729167	0.0104796	0.426458	0.157658	0.454455	0.454404	0.559071	0.000114416	0.780607	FALSE
ENSG00000121900.19	80	0.997296	21.6047	33.0225	0.0357273	1:32950022:T:C	48584	48584	15	21	0.21875	0.0305492	-0.350311	0.155406	0.547245	0.545593	0.593093	0.000168773	0.828111	FALSE
ENSG00000287691.1	117	0.976652	19.9609	32.4772	0.040634	1:32957605:G:A	32151	32151	10	14	0.145833	0.0334667	0.48812	0.220508	0.570443	0.573778	0.602952	0.000160862	0.841876	FALSE
ENSG00000116514.17	159	1.02252	31.1616	30.7488	0.0167694	1:33014260:T:C	49451	49451	14	20	0.208333	0.0106436	0.22747	0.084289	0.40346	0.398772	0.535165	0.000135811	0.747228	FALSE
ENSG00000004455.18	93	1.00994	25.001	30.9682	0.00104328	1:33033827:C:G	-47169	-47169	3	5	0.0520833	0.000485514	-0.895507	0.23281	0.0222978	0.0247405	0.176454	0.000157285	0.246375	FALSE
ENSG00000142920.17	93	1.00832	25.391	31.2071	0.0506112	1:33105516:G:A	24412	24412	5	5	0.0520833	0.0382725	0.604045	0.28053	0.728727	0.729585	0.649689	0.000153394	0.907134	FALSE
ENSG00000278997.1	199	1.0217	42.0768	30.8931	0.00326478	1:33107836:TAAATG:T	-35394	-35394	15	20	0.208333	0.00172459	-0.693138	0.204206	0.119888	0.12193	0.358845	0.000100116	0.50104	FALSE
ENSG00000279179.1	192	1.01266	36.5702	30.368	0.0475727	1:33128204:C:CA	-34648	-34648	12	14	0.145833	0.0332386	0.635078	0.286501	0.825717	0.82852	0.675814	0.000109273	0.943611	FALSE
ENSG00000116525.14	165	0.965327	31.932	32.1401	0.00202798	1:33135420:C:A	-46639	-46639	9	13	0.135417	0.00127088	0.657639	0.187625	0.0715928	0.0700099	0.285428	9.35489e-05	0.398531	FALSE
ENSG00000160094.15	96	1.01351	26.7325	31.7571	0.0389482	1:33302224:C:A	45732	45732	7	8	0.0833333	0.0300708	-0.535913	0.23701	0.649135	0.648678	0.624574	0.000150222	0.872066	FALSE
ENSG00000225313.5	194	1.00032	49.4139	31.6982	0.00804869	1:33309484:G:C	2136	2136	11	13	0.135417	0.00532555	-0.705141	0.237281	0.335966	0.32908	0.505431	7.51509e-05	0.705712	FALSE
ENSG00000184389.9	183	1.02757	44.2291	30.8572	8.44882e-08	1:33310172:G:A	-10926	-10926	13	16	0.166667	1.12573e-08	1.03053	0.139	9.999e-05	2.61709e-06	0.000323744	9.85153e-05	0.00045203	TRUE
ENSG00000134686.21	7	1.01187	5.81797	34.511	0.00843682	1:33402868:C:G	-28227	-28227	5	9	0.09375	0.00797966	0.149902	0.0532742	0.0461954	0.0462138	0.24009	0.000682917	0.335228	FALSE
ENSG00000121903.15	29	0.978041	10.9386	34.8482	0.0471039	1:33516905:GAA:G	44260	44260	6	11	0.114583	0.0466189	0.568545	0.275626	0.422958	0.420652	0.544249	0.000296224	0.759911	FALSE
ENSG00000187513.9	87	1.07368	37.4756	34.3886	0.0139808	1:34811391:G:A	18392	18392	3	6	0.0625	0.013145	0.659697	0.252485	0.381162	0.37516	0.525977	0.00014973	0.734399	FALSE
ENSG00000163866.9	165	1.05811	46.5143	30.7615	0.00993146	1:34848325:TCA:T	-11430	-11430	26	37	0.385417	0.00590963	0.276696	0.0943881	0.348465	0.344075	0.512057	0.000111032	0.714964	FALSE
ENSG00000116544.12	77	1.01261	15.1367	31.1881	0.0264907	1:34972251:A:C	42601	42601	8	11	0.114583	0.0186396	-0.498875	0.202174	0.330367	0.328088	0.505431	0.000263843	0.705712	FALSE
ENSG00000284773.1	114	1.00796	14.8394	29.3376	0.0201307	1:35003760:A:G	18447	18447	3	6	0.0625	0.0110307	0.616361	0.229621	0.259574	0.257053	0.463459	0.000261863	0.647108	FALSE
ENSG00000197056.11	87	1.03382	13.7403	28.6135	0.0100722	1:35040932:C:CA	8760	8760	5	8	0.0833333	0.00436478	0.875139	0.287111	0.118888	0.119709	0.355592	0.000328278	0.496499	FALSE
ENSG00000116560.12	157	0.997605	10.698	30.0535	0.00267411	1:35169852:C:A	-23594	-23594	5	5	0.0520833	0.00117725	1.47835	0.418486	0.0246975	0.0285072	0.188733	0.000341464	0.263519	FALSE
ENSG00000146463.12	58	0.970054	6.75942	33.2048	0.0668957	1:35313390:C:CT	44681	44681	3	6	0.0625	0.0598392	0.288557	0.148355	0.388761	0.387884	0.531472	0.000456203	0.742072	FALSE
ENSG00000020129.16	58	1.00654	17.454	31.6915	0.025634	1:35602257:G:A	44784	44784	18	22	0.229167	0.0189233	0.653366	0.26547	0.370863	0.361335	0.519068	0.000220785	0.724753	FALSE
ENSG00000142687.19	58	1.00242	17.6555	31.6303	0.113943	1:35523257:T:C	-34693	-34693	6	10	0.104167	0.0961036	0.279022	0.163163	0.876412	0.881392	0.689057	0.000212977	0.962101	FALSE
ENSG00000116819.9	55	1.01098	16.5133	31.7871	0.100329	1:35524302:G:A	-49012	-49012	3	6	0.0625	0.084429	0.431251	0.242822	0.820118	0.822661	0.674097	0.000239556	0.941213	FALSE
ENSG00000239636.3	54	0.981731	16.0234	32.1021	0.0343319	1:35603603:A:G	25824	25824	6	8	0.0833333	0.0270353	-0.62305	0.269964	0.437756	0.437521	0.55004	0.000206874	0.767998	FALSE
ENSG00000126067.12	71	1.02009	10.8783	33.5499	0.104199	1:35603603:A:G	-37923	-37923	6	8	0.0833333	0.0968981	-0.183005	0.107281	0.690531	0.690435	0.636858	0.000383338	0.889218	FALSE
ENSG00000142686.8	99	0.997746	11.2721	30.3214	0.0414418	1:35735177:T:C	16283	16283	9	12	0.125	0.0282971	-0.444919	0.194465	0.387461	0.380486	0.528255	0.000324349	0.73758	FALSE
ENSG00000092853.14	121	0.999052	18.581	30.6023	0.00661743	1:35768411:AT:A	-1567	-1567	8	10	0.104167	0.0036492	-1.02931	0.330321	0.117188	0.116338	0.352284	0.000198324	0.491879	FALSE
ENSG00000134698.11	106	1.00115	21.7278	31.3773	0.000172506	1:35851077:G:C	43061	43061	7	11	0.114583	7.17907e-05	0.363877	0.0808526	0.0039996	0.00371571	0.0628603	0.000171754	0.0877692	TRUE
ENSG00000092847.14	60	1.00557	24.4485	33.0731	0.023429	1:35830143:CAA:C	-39665	-39665	17	23	0.760417	0.0196791	-0.591504	0.241965	0.437556	0.437196	0.549868	0.000156727	0.767758	FALSE
ENSG00000126070.20	46	1.0197	13.7867	31.8737	0.00648813	1:35969516:G:A	38798	38798	3	5	0.0520833	0.00431228	-0.506872	0.166041	0.079892	0.0811815	0.303593	0.000301859	0.423895	FALSE
ENSG00000271554.1	31	1.00655	11.8635	33.2156	0.0430828	1:35986557:T:G	-27073	-27073	3	5	0.0520833	0.0377721	-0.715677	0.331456	0.409359	0.403811	0.53714	0.0003248	0.749986	FALSE
ENSG00000116863.11	48	1.01726	19.9653	33.5835	0.00141949	1:36078636:T:C	-10256	-10256	12	20	0.208333	0.00112119	0.385277	0.108524	0.0261974	0.0261086	0.181642	0.000205567	0.253619	FALSE
ENSG00000171812.13	95	1.01001	30.3568	32.1921	0.022483	1:36161877:ATG:A	36655	36655	31	47	0.510417	0.0172651	-0.344392	0.137769	0.50115	0.493794	0.573842	0.000129595	0.801231	FALSE
ENSG00000116871.16	111	1.01525	32.9225	32.0199	0.000224266	1:36172107:A:G	16528	16528	31	41	0.572917	0.000113225	-0.445856	0.102572	0.00629937	0.00678356	0.0884424	0.000123234	0.123488	FALSE
ENSG00000054116.12	111	1.01324	32.0811	31.7542	0.0976231	1:36150068:G:A	-5985	-5985	8	14	0.145833	0.0817977	0.193176	0.107805	0.959804	0.961979	0.707493	0.000124985	0.987843	FALSE
ENSG00000054118.15	114	1.02797	28.6196	31.1478	0.0218417	1:36272733:T:A	48301	48301	4	8	0.0833333	0.0149788	0.577853	0.225814	0.465953	0.455079	0.55951	0.000152565	0.78122	FALSE
ENSG00000214193.11	128	1.02333	38.4281	31.7652	0.0274326	1:36316228:TTTTTGTTTT:T	9860	9860	3	6	0.0625	0.0205291	-0.51202	0.211001	0.649335	0.64701	0.623785	0.000110654	0.870964	FALSE
ENSG00000142694.7	137	1.0276	38.4453	30.6868	0.028756	1:36295955:CTTTTTTTTT:C	-28200	-28200	12	13	0.135417	0.0193995	-0.340946	0.139125	0.669533	0.663236	0.62876	0.00011335	0.87791	FALSE
ENSG00000196182.11	153	1.03545	58.9329	32.7827	0.0171693	1:36397922:A:G	11998	11998	11	15	0.84375	0.0137585	0.22088	0.0851478	0.626337	0.624613	0.618053	7.73282e-05	0.862961	FALSE
ENSG00000181817.6	160	1.03129	58.6527	32.4914	0.000249131	1:36397922:A:G	14	14	11	15	0.84375	0.000142404	0.401299	0.0940032	0.00949905	0.0125419	0.125344	7.58886e-05	0.175012	FALSE
ENSG00000116885.18	153	1.03709	50.86	31.6024	0.0317078	1:36461345:T:G	10894	10894	3	5	0.0520833	0.0236782	1.05414	0.445638	0.793221	0.795073	0.667001	9.04289e-05	0.931305	FALSE
ENSG00000116898.12	127	1.0354	41.1483	31.1667	0.0143827	1:36457893:G:C	-6491	-6491	17	22	0.229167	0.00943286	0.303057	0.110314	0.441656	0.432013	0.548182	0.000110703	0.765403	FALSE
ENSG00000119535.19	132	1.04909	38.6144	31.0432	0.00933392	1:36436843:C:T	-46435	-46435	4	7	0.0729167	0.00573176	0.303585	0.103143	0.284772	0.281776	0.477344	0.000127307	0.666495	FALSE
ENSG00000233621.3	109	1.02182	45.5721	33.4821	0.00564057	1:37455481:A:G	-18951	-18951	37	48	0.5	0.0046414	0.401981	0.132904	0.216878	0.218293	0.440836	9.25032e-05	0.615521	FALSE
ENSG00000163874.11	109	1.03084	43.2162	32.7365	0.00998533	1:37468440:TA:T	-6140	-6140	6	9	0.09375	0.00769405	-0.456914	0.161557	0.337466	0.337358	0.509415	0.000102721	0.711275	FALSE
ENSG00000163875.16	97	1.02256	49.1745	33.85	0.00105839	1:37555581:CA:C	40815	40815	6	8	0.0833333	0.000866983	0.450907	0.123805	0.0465953	0.0470065	0.242539	8.60957e-05	0.338647	FALSE
ENSG00000163877.11	50	1.02125	28.0516	33.2594	0.0501559	1:37591215:T:G	36922	36922	3	6	0.0625	0.0444338	0.454738	0.218105	0.756024	0.756948	0.657155	0.000149758	0.917557	FALSE
ENSG00000237749.4	49	1.03462	28.6172	33.3219	0.0250518	1:37534584:G:A	-21663	-21663	21	24	0.75	0.0216106	-0.446292	0.185591	0.50015	0.499893	0.575465	0.000158446	0.803497	FALSE
ENSG00000134697.13	34	1.01958	22.9425	34.2823	0.00305546	1:37547752:C:CA	-48185	-48185	3	5	0.0520833	0.00275902	-0.676846	0.210135	0.0638936	0.0638299	0.275972	0.00018133	0.385328	FALSE
ENSG00000116922.15	113	0.994228	15.1583	30.7882	0.00137609	1:37705778:CTGTTTTTT:C	13529	13529	4	7	0.0729167	0.000638527	0.585578	0.156139	0.0185981	0.0211719	0.164605	0.000236123	0.22983	FALSE
ENSG00000134690.11	113	1.00955	14.715	30.1232	0.0699628	1:37692045:A:G	-436	-436	15	21	0.21875	0.0505148	-0.44098	0.217734	0.654135	0.652194	0.625594	0.000266565	0.87349	FALSE
ENSG00000185090.15	82	1.02	25.5435	31.3268	0.0244559	1:37787978:GCAAGC:G	-5869	-5869	7	7	0.0729167	0.0173077	1.04554	0.418426	0.464454	0.459119	0.560949	0.000163271	0.783229	FALSE
ENSG00000197982.14	95	1.02812	28.779	31.102	0.0195761	1:37834083:T:C	27104	27104	9	12	0.125	0.0131928	0.385108	0.147476	0.428057	0.420357	0.543993	0.000151851	0.759555	FALSE
ENSG00000196449.4	98	1.02476	29.7804	31.1791	0.0043514	1:37788546:G:A	-19662	-19662	8	8	0.0833333	0.00249661	1.13479	0.348289	0.115688	0.114514	0.350061	0.000143951	0.488775	FALSE
ENSG00000188786.10	124	1.00058	41.1543	31.9061	0.00565842	1:37871895:C:CA	12303	12303	8	8	0.0833333	0.00373207	0.456251	0.146819	0.211179	0.208034	0.434135	9.0374e-05	0.606165	FALSE
ENSG00000204084.13	189	1.04201	56.2735	31.6922	0.00884437	1:37996149:C:T	49092	49092	24	34	0.354167	0.00590056	-0.301362	0.102781	0.383862	0.373325	0.525133	8.40158e-05	0.733221	FALSE
ENSG00000183431.12	178	1.0244	54.7596	32.3124	0.000128451	1:37957563:C:A	-32512	-32512	14	15	0.15625	6.67004e-05	0.844155	0.186545	0.00519948	0.00614724	0.0849918	7.81413e-05	0.11867	FALSE
ENSG00000183386.10	183	1.0134	46.7256	31.5667	0.00126704	1:37988895:A:T	-16711	-16711	12	14	0.145833	0.000682117	-0.787913	0.211403	0.0548945	0.055064	0.259655	8.59007e-05	0.362545	FALSE
ENSG00000183520.12	167	1.02986	43.5226	31.2829	0.0273457	1:37988883:A:G	-20375	-20375	3	5	0.0520833	0.0194956	0.938846	0.383428	0.692631	0.689416	0.636548	0.000101431	0.888785	FALSE
ENSG00000116954.8	89	1.04341	29.7848	31.9834	0.0716624	1:38895943:G:A	36171	36171	3	5	0.0520833	0.059356	0.381124	0.195556	0.880312	0.882786	0.68924	0.000159916	0.962357	FALSE
ENSG00000228436.4	89	1.0406	28.7556	31.6692	0.0259234	1:38895943:G:A	36031	36031	3	5	0.0520833	0.0191143	0.842606	0.342952	0.520448	0.511184	0.579467	0.000163064	0.809085	FALSE
ENSG00000174574.16	100	1.00205	47.6616	33.7518	0.00190914	1:38995898:G:A	4622	4622	5	7	0.0729167	0.0015685	0.430214	0.125468	0.0850915	0.0865516	0.310841	7.87278e-05	0.434014	FALSE
ENSG00000168653.11	176	1.04884	63.0782	32.1177	0.00475697	1:39004692:A:G	-21626	-21626	20	23	0.239583	0.00318962	-0.374655	0.118308	0.245375	0.238976	0.45379	7.78469e-05	0.633608	FALSE
ENSG00000127603.32	111	1.05071	47.0784	33.2435	0.00601025	1:39096588:CA:C	15272	15272	3	5	0.0520833	0.00480377	-0.596465	0.198067	0.226177	0.226001	0.444933	0.000105366	0.621241	FALSE
ENSG00000291129.1	139	1.02455	27.8762	31.3918	0.00694187	1:39557105:C:G	-2593	-2593	3	6	0.0625	0.00433302	0.75515	0.24752	0.172883	0.167622	0.39908	0.000153593	0.557218	FALSE
ENSG00000090621.15	120	1.01383	24.5512	32.2963	0.00577263	1:39576042:G:A	-748	-748	10	11	0.114583	0.00403603	0.524802	0.170507	0.132487	0.12818	0.364622	0.000163871	0.509106	FALSE
ENSG00000116983.13	44	0.997869	22.6432	34.0066	0.000548093	1:39679146:A:T	-12339	-12339	32	41	0.427083	0.000453347	0.458486	0.118458	0.0117988	0.0124639	0.124972	0.000161591	0.174493	FALSE
ENSG00000084072.17	45	1.00615	22.6219	33.9956	0.016642	1:39679185:G:GCTTCTTCT	-12997	-12997	36	42	0.4375	0.0150929	-0.467198	0.182797	0.314569	0.313047	0.496715	0.000169964	0.693542	FALSE
ENSG00000116985.12	142	1.01449	48.8267	32.2084	0.0228296	1:39750562:A:G	-38303	-38303	3	6	0.0625	0.0175814	-0.82649	0.331637	0.670733	0.670398	0.630896	8.27323e-05	0.880894	FALSE
ENSG00000261798.1	143	1.02007	48.812	32.2164	0.0026453	1:39740838:A:G	-48138	-48138	18	19	0.197917	0.00171694	0.824794	0.242878	0.114189	0.115355	0.351019	8.5494e-05	0.490113	FALSE
ENSG00000284719.3	138	1.01583	52.3987	33.3324	0.00165769	1:39834012:C:CA	34593	34593	4	8	0.0833333	0.00126233	0.740151	0.21102	0.0784922	0.0795475	0.301374	7.77006e-05	0.420796	FALSE
ENSG00000043514.17	108	1.01903	25.5139	31.6139	0.000500226	1:39896171:A:C	12660	12660	19	20	0.208333	0.000247336	0.562236	0.137793	0.0109989	0.0115833	0.118858	0.000162544	0.165956	FALSE
ENSG00000116990.11	102	1.00289	30.1511	32.9933	0.0772928	1:39869824:G:A	-32432	-32432	14	16	0.166667	0.0687086	-0.261967	0.13948	0.908809	0.911117	0.696037	0.000125073	0.971847	FALSE
ENSG00000168389.18	69	0.995486	21.6713	32.0847	0.000595077	1:39941043:C:T	-14069	-14069	3	6	0.0625	0.00033231	0.878365	0.220783	0.0111989	0.0130951	0.127329	0.000166422	0.177785	FALSE
ENSG00000131236.18	320	1.0127	43.6448	30.3684	0.0132449	1:40085102:C:T	44869	44869	17	26	0.270833	0.00776415	0.253545	0.0897627	0.435356	0.435015	0.549486	9.15856e-05	0.767224	FALSE
ENSG00000131238.18	202	1.02033	39.3454	30.7093	0.00154415	1:40095799:C:T	-1461	-1461	15	24	0.25	0.00071569	0.489084	0.131825	0.0571943	0.0552394	0.259932	0.000106218	0.362932	FALSE
ENSG00000117000.9	130	1.02281	11.9861	31.1835	0.163417	1:40194163:A:ATAACT	32776	32776	5	7	0.927083	0.139467	-0.396154	0.261976	0.879212	0.877875	0.688529	0.000353432	0.961364	FALSE
ENSG00000259943.2	57	1.02208	23.8231	32.8816	0.0253728	1:40257003:C:G	-968	-968	6	6	0.0625	0.0210204	-1.0406	0.430617	0.450355	0.447275	0.555113	0.000177173	0.775081	FALSE
ENSG00000084073.10	57	0.997578	23.9274	32.9325	0.00376262	1:40233523:C:A	-24518	-24518	3	5	0.0520833	0.00280553	-0.646039	0.200959	0.0871913	0.0868444	0.31119	0.00015265	0.434502	FALSE
ENSG00000049089.15	155	1.02906	39.6191	31.4587	0.0163055	1:40305354:G:A	-12459	-12459	6	7	0.0729167	0.0112254	-1.17394	0.438504	0.465953	0.46471	0.563574	0.000110914	0.786895	FALSE
ENSG00000084070.12	218	1.0238	54.0129	31.3342	0.0436387	1:40386853:C:CT	42003	42003	19	23	0.239583	0.0328381	-0.320196	0.144097	0.90461	0.906415	0.695093	7.8948e-05	0.970529	FALSE
ENSG00000187801.15	176	1.03591	63.8601	32.6899	0.0234647	1:40455566:C:T	5464	5464	3	5	0.0520833	0.0189943	0.814785	0.331269	0.768623	0.769166	0.659471	7.15491e-05	0.920792	FALSE
ENSG00000260920.2	184	1.04604	62.3508	31.9584	0.00959504	1:40473715:T:C	9396	9396	3	5	0.0520833	0.00668074	0.951461	0.329947	0.434257	0.429674	0.54813	7.75466e-05	0.76533	FALSE
ENSG00000187815.10	199	1.03761	58.0211	31.9631	0.0415202	1:40508628:A:AG	31338	31338	19	25	0.739583	0.0328131	0.312736	0.140719	0.907109	0.908849	0.695634	7.9504e-05	0.971285	FALSE
ENSG00000238287.1	284	1.01071	51.7037	30.9972	0.00721779	1:40481631:CTT:C	-27030	-27030	3	6	0.0625	0.00427116	-0.558139	0.182616	0.309369	0.307433	0.493654	7.64115e-05	0.689269	FALSE
ENSG00000164002.12	284	1.00623	51.8267	31.0784	0.000174587	1:40511246:T:G	2505	2505	6	6	0.0625	6.70784e-05	1.64799	0.364333	0.00839916	0.00872543	0.102256	7.42325e-05	0.142776	FALSE
ENSG00000117010.17	272	1.01915	39.4704	30.3516	0.0545968	1:40522179:TA:T	-9394	-9394	13	16	0.166667	0.0388049	0.451787	0.210431	0.887711	0.887427	0.690428	0.000105159	0.964015	FALSE
ENSG00000117016.10	213	1.00598	27.8235	30.1011	0.0117211	1:40712659:CT:C	46976	46976	22	30	0.3125	0.00651044	0.532395	0.18398	0.284272	0.276998	0.474553	0.000138056	0.662599	FALSE
ENSG00000237899.1	255	0.991666	39.9725	30.6624	2.10414e-07	1:40685295:ATTATATATA:A	-2293	-2293	28	39	0.59375	2.85634e-08	0.952536	0.134197	9.999e-05	9.30265e-06	0.000870332	8.81496e-05	0.00121521	TRUE
ENSG00000066136.21	255	1.00986	40.7298	30.8587	0.0282344	1:40685364:A:AAT	-6284	-6284	9	11	0.114583	0.0193451	-0.415908	0.169631	0.685431	0.684701	0.63525	9.65099e-05	0.886973	FALSE
ENSG00000272145.2	252	1.00583	41.519	31.0003	0.000307744	1:40733299:G:A	41225	41225	4	7	0.0729167	0.000124124	0.837499	0.194061	0.010399	0.0123493	0.124349	9.24392e-05	0.173623	FALSE
ENSG00000117013.17	113	1.01112	31.9717	31.0785	0.00984228	1:40750482:A:G	-33305	-33305	6	7	0.0729167	0.006111	0.855092	0.292995	0.264374	0.266199	0.467837	0.000123859	0.653221	FALSE
ENSG00000179862.7	133	1.00245	10.884	32.5632	0.0909629	1:40855858:C:A	-6505	-6505	15	18	0.1875	0.0795378	-0.262499	0.145355	0.643136	0.644842	0.62336	0.000345506	0.870372	FALSE
ENSG00000171793.17	114	1.06136	24.1517	31.8097	0.0293907	1:40998765:A:G	19465	19465	3	6	0.0625	0.0222283	0.539076	0.225306	0.494051	0.484819	0.571301	0.000217481	0.797683	FALSE
ENSG00000281207.1	81	1.03774	28.217	32.2465	0.0100763	1:41000215:ATGTTT:A	-14375	-14375	6	9	0.09375	0.00730929	0.55217	0.193852	0.236776	0.23274	0.450225	0.000163537	0.62863	FALSE
ENSG00000171790.16	68	1.01961	30.6999	33.7035	0.0296738	1:41052369:C:G	29132	29132	3	6	0.0625	0.0266608	0.880088	0.380334	0.59664	0.594739	0.6087	0.000135551	0.849902	FALSE
ENSG00000010803.17	19	1.00136	6.84776	34.0576	0.140667	1:41279149:G:A	36843	36843	6	8	0.0833333	0.135214	-0.215286	0.140787	0.642936	0.645338	0.623461	0.000545522	0.870512	FALSE
ENSG00000127124.16	40	0.98354	9.19108	33.6861	0.141715	1:42016036:G:T	-19889	-19889	3	6	0.0625	0.134073	0.324707	0.211703	0.754825	0.759824	0.657787	0.000364834	0.91844	FALSE
ENSG00000198815.9	63	1.00989	12.8771	32.0949	0.0510966	1:42286198:G:C	-49679	-49679	6	11	0.114583	0.0415157	0.221366	0.104607	0.490951	0.486373	0.571479	0.000305201	0.797932	FALSE
ENSG00000127125.9	99	1.0159	24.4253	32.4152	0.00913841	1:42450365:A:G	-5752	-5752	3	6	0.0625	0.00672243	0.726449	0.25213	0.19948	0.194707	0.423875	0.00016672	0.591838	FALSE
ENSG00000066185.13	99	1.02031	24.4731	32.3405	0.0459068	1:42425398:T:C	-30855	-30855	3	5	0.0520833	0.0377174	0.789659	0.365609	0.677032	0.675442	0.63264	0.000170715	0.883328	FALSE
ENSG00000186409.19	100	1.00759	25.9365	32.5824	0.006932	1:42459023:C:T	-4198	-4198	17	18	0.1875	0.00511143	0.565488	0.18928	0.164684	0.162387	0.394912	0.00014952	0.551399	FALSE
ENSG00000236876.3	55	1.02513	28.9812	33.1918	0.00662318	1:42457980:T:A	-42359	-42359	33	47	0.510417	0.00528286	0.47808	0.160707	0.167983	0.166128	0.397745	0.000148233	0.555355	FALSE
ENSG00000171960.12	62	1.0073	24.7904	32.7738	0.121455	1:42655462:A:G	-2873	-2873	12	14	0.145833	0.109332	0.237548	0.144579	0.959904	0.959076	0.707056	0.000156162	0.987233	FALSE
ENSG00000285728.3	66	1.01789	27.3355	33.0291	0.0981217	1:42642517:G:A	-39690	-39690	5	5	0.0520833	0.0884964	0.789232	0.450422	0.935106	0.938606	0.702039	0.000150715	0.980227	FALSE
ENSG00000065978.19	66	1.00631	25.5482	32.5466	0.0447778	1:42666722:G:GA	-15696	-15696	7	9	0.09375	0.0373328	0.438819	0.202736	0.691731	0.687316	0.635981	0.000150644	0.887993	FALSE
ENSG00000117385.16	137	1.02388	35.5784	31.2247	0.0446046	1:42807153:G:GT	40069	40069	15	22	0.229167	0.0333263	-0.32812	0.148102	0.794021	0.795863	0.667127	0.000119893	0.93148	FALSE
ENSG00000283580.4	136	1.04481	34.0343	30.6387	0.0597412	1:42747198:A:T	-20094	-20094	9	10	0.104167	0.0439817	-0.624545	0.298872	0.869613	0.867973	0.687006	0.000141054	0.959238	FALSE
ENSG00000164010.15	149	1.03072	48.389	31.6155	0.0215613	1:42818381:G:C	1259	1259	17	23	0.760417	0.0155331	-0.414951	0.163116	0.646535	0.638943	0.6218	9.16817e-05	0.868193	FALSE
ENSG00000177868.12	149	1.0176	47.9203	31.5276	4.1043e-05	1:42830524:C:T	13127	13127	10	10	0.104167	1.52714e-05	1.18554	0.236337	0.00189981	0.0017479	0.0382317	8.58429e-05	0.0533813	TRUE
ENSG00000228192.10	127	1.01557	39.8004	31.5141	0.0242788	1:42835250:C:G	-11177	-11177	4	8	0.0833333	0.0175082	0.583953	0.234152	0.619238	0.617309	0.616111	0.000102134	0.86025	FALSE
ENSG00000164011.18	126	1.01992	38.976	31.1684	0.015223	1:42845494:A:G	-1079	-1079	26	40	0.416667	0.0100499	-0.338295	0.124291	0.445755	0.440398	0.551716	0.00010697	0.770337	FALSE
ENSG00000117394.24	195	1.01958	58.2091	31.9011	0.00909908	1:42951360:GA:G	-7533	-7533	7	12	0.125	0.00625854	0.602365	0.207058	0.406159	0.403124	0.53692	7.14913e-05	0.749678	FALSE
ENSG00000227533.7	195	1.02153	60.6479	32.3599	0.00442114	1:42950462:T:C	-8587	-8587	11	13	0.135417	0.00305683	0.760442	0.238929	0.226877	0.226672	0.444933	6.93972e-05	0.621241	FALSE
ENSG00000117395.13	25	1.00841	5.35227	33.5552	0.118207	1:43319285:A:G	48349	48349	15	21	0.21875	0.110464	0.245151	0.1497	0.487951	0.486159	0.571479	0.000727439	0.797932	FALSE
ENSG00000066056.14	19	1.00454	6.14651	35.4232	0.00452273	1:43319285:A:G	18303	18303	15	21	0.21875	0.00477326	0.64614	0.214389	0.0252975	0.0269907	0.18458	0.000619281	0.257721	FALSE
ENSG00000117400.18	47	0.990428	16.1216	32.0444	0.070499	1:43383463:G:A	45645	45645	11	13	0.135417	0.058558	0.520538	0.266206	0.692731	0.695939	0.638289	0.000216935	0.891216	FALSE
ENSG00000234694.2	70	1.00947	21.5589	31.9501	0.0268763	1:43405602:T:G	46926	46926	10	15	0.15625	0.0204438	-0.568813	0.234234	0.442256	0.439634	0.55135	0.000181884	0.769827	FALSE
ENSG00000117399.14	70	0.992958	22.5566	32.5127	0.0538536	1:43405952:A:G	46971	46971	8	13	0.135417	0.0453402	-0.476791	0.229709	0.713729	0.71571	0.644724	0.000157453	0.9002	FALSE
ENSG00000066322.15	81	0.995109	24.5211	32.1429	0.0901375	1:43413041:G:C	44967	44967	26	41	0.572917	0.0768102	-0.165088	0.0905441	0.90151	0.902178	0.693855	0.000146744	0.968801	FALSE
ENSG00000159479.17	94	1.00132	25.252	31.3623	0.000598221	1:43384246:A:G	-5562	-5562	5	5	0.0520833	0.0002846	-0.868995	0.215527	0.0148985	0.0149064	0.135359	0.000147937	0.188996	FALSE
ENSG00000198198.17	94	1.00734	25.3117	31.5556	0.0343017	1:43351682:A:G	-38200	-38200	3	5	0.0520833	0.0256981	0.787681	0.338059	0.584042	0.583369	0.605828	0.000152983	0.845892	FALSE
ENSG00000178922.18	102	1.01968	21.1398	30.7285	0.00398465	1:43481047:G:A	27058	27058	7	7	0.0729167	0.00209819	-1.08669	0.327079	0.0777922	0.0764492	0.295841	0.000196898	0.41307	FALSE
ENSG00000142949.17	16	0.992891	6.66393	32.8218	0.343767	1:43573919:T:C	48732	48732	4	5	0.0520833	0.328014	0.461193	0.46492	0.940206	0.940343	0.702475	0.000532834	0.980835	FALSE
ENSG00000236200.7	66	1.02323	36.1529	33.6242	0.0258955	1:43752037:G:A	43899	43899	3	6	0.0625	0.0229931	0.723884	0.304394	0.607739	0.602547	0.611415	0.000117548	0.853693	FALSE
ENSG00000237950.3	116	1.01745	39.8528	31.8411	0.0271833	1:43927861:C:T	-12920	-12920	27	39	0.40625	0.020478	0.42681	0.17581	0.660934	0.659494	0.627814	0.000103125	0.87659	FALSE
ENSG00000288573.3	123	1.01771	44.5585	32.688	0.010144	1:43930573:T:A	-16051	-16051	8	9	0.09375	0.00777783	-0.755584	0.267566	0.363964	0.356653	0.516617	9.23771e-05	0.721331	FALSE
ENSG00000117408.11	123	1.01535	43.3738	32.2755	0.00959177	1:43927249:C:T	-19701	-19701	3	6	0.0625	0.00695659	-0.442099	0.154158	0.336066	0.334418	0.508296	9.36012e-05	0.709712	FALSE
ENSG00000132768.14	113	1.00794	43.1499	32.6108	0.0312046	1:43930114:C:T	-39886	-39886	16	24	0.25	0.0255401	0.322398	0.138209	0.741926	0.742625	0.653227	9.00682e-05	0.912073	FALSE
ENSG00000117410.14	108	1.01235	40.1444	32.1939	0.0192754	1:43949743:C:T	-24744	-24744	30	39	0.59375	0.0146258	-0.236571	0.0920918	0.534947	0.536447	0.589289	9.93651e-05	0.822799	FALSE
ENSG00000117411.18	99	1.03281	33.7358	30.8086	0.0672148	1:43948484:T:A	-30459	-30459	25	39	0.40625	0.0508619	0.339378	0.167835	0.89831	0.898927	0.693279	0.000133051	0.967995	FALSE
ENSG00000159214.13	95	1.02478	34.8604	32.113	0.0134422	1:43976849:A:C	-14510	-14510	28	38	0.604167	0.00981779	-0.51982	0.190327	0.362864	0.364277	0.520819	0.000122996	0.727197	FALSE
ENSG00000230615.8	64	1.00543	19.5291	32.3741	0.0204052	1:44009223:CT:C	-21191	-21191	5	7	0.0729167	0.0158481	0.702639	0.277115	0.334467	0.328895	0.505431	0.000196034	0.705712	FALSE
ENSG00000196517.13	62	0.983667	17.3421	32.1025	0.00065757	1:44003359:T:C	-28108	-28108	10	12	0.125	0.000371812	0.897626	0.227854	0.0113989	0.0122808	0.123846	0.000193447	0.172921	FALSE
ENSG00000178028.14	66	0.978498	13.7827	32.6285	0.0722285	1:44216412:A:T	2957	2957	21	24	0.75	0.0624882	0.273571	0.142172	0.646235	0.65302	0.625962	0.000235729	0.874005	FALSE
ENSG00000117419.16	71	1.04298	20.3922	30.8971	0.0620149	1:44355849:A:C	589	589	24	37	0.385417	0.0468005	-0.211572	0.102658	0.720828	0.713685	0.644211	0.00023293	0.899484	FALSE
ENSG00000187147.18	22	1.00816	7.45323	32.6466	0.0398524	1:44357177:A:C	-48017	-48017	5	9	0.09375	0.0332421	-0.2832	0.127762	0.261474	0.258007	0.463898	0.000521781	0.647722	FALSE
ENSG00000126106.14	103	1.00392	19.3	31.0099	0.028645	1:44643429:A:G	-31052	-31052	25	37	0.385417	0.0199665	-0.301307	0.123566	0.432857	0.427423	0.547063	0.000196585	0.76384	FALSE
ENSG00000198520.12	103	0.991687	20.9254	32.172	0.0643417	1:44721839:T:C	47147	47147	7	9	0.09375	0.0535332	-0.439873	0.220156	0.753125	0.754117	0.65654	0.000168417	0.916699	FALSE
ENSG00000142945.13	106	1.0295	20.4111	30.5162	0.00943643	1:44731636:G:A	-8182	-8182	16	24	0.25	0.00538824	-0.52615	0.17732	0.169783	0.165377	0.396958	0.000215744	0.554255	FALSE
ENSG00000142937.12	146	1.04089	26.6799	29.8456	0.00673532	1:44733311:CAA:C	-41940	-41940	6	8	0.0833333	0.00330482	-0.658323	0.208763	0.154185	0.15094	0.385706	0.000176024	0.538545	FALSE
ENSG00000225721.5	145	1.05118	26.6394	29.5824	0.0188979	1:44792055:A:C	16245	16245	10	12	0.125	0.0105655	-0.625291	0.231447	0.383062	0.374179	0.525447	0.000186603	0.733659	FALSE
ENSG00000142959.5	148	1.03777	26.839	30.1256	0.0624693	1:44759085:G:A	-29085	-29085	6	10	0.104167	0.044398	-0.522635	0.250625	0.811319	0.812837	0.671798	0.000171956	0.938003	FALSE
ENSG00000173846.13	139	1.04942	26.2073	29.6146	0.0249591	1:44789395:CA:C	-10982	-10982	14	17	0.177083	0.0146668	0.453266	0.176526	0.472853	0.460963	0.56152	0.000187856	0.784026	FALSE
ENSG00000188396.4	142	1.02278	29.3985	30.7467	0.0122891	1:44819976:C:T	12625	12625	8	8	0.0833333	0.00749764	0.97913	0.344959	0.29687	0.29441	0.484767	0.000144168	0.676859	FALSE
ENSG00000290041.1	142	1.0314	28.5309	30.4896	0.00550542	1:44814141:T:C	6617	6617	11	13	0.135417	0.00290908	0.796753	0.248888	0.138186	0.135562	0.372953	0.000156056	0.520738	FALSE
ENSG00000222009.9	143	1.03396	27.0938	29.6613	0.00361796	1:44797373:CT:C	-11151	-11151	6	6	0.0625	0.00155259	-1.21742	0.354666	0.0834917	0.085164	0.309755	0.000166727	0.432497	FALSE
ENSG00000117425.14	106	1.02507	22.2091	30.2859	0.125302	1:44849305:C:G	6052	6052	3	6	0.0625	0.0990045	-0.422	0.249004	0.941806	0.946443	0.703329	0.000193337	0.982028	FALSE
ENSG00000070785.17	127	1.01736	18.1711	30.4982	0.0219062	1:45000839:T:C	14117	14117	4	7	0.0729167	0.0139761	-0.600433	0.232041	0.329667	0.323289	0.503326	0.000225984	0.702773	FALSE
ENSG00000126088.14	127	0.992658	19.5724	31.8229	0.00190039	1:44972499:A:C	-38451	-38451	3	5	0.0520833	0.0011182	-0.558923	0.157393	0.0372963	0.0375512	0.217168	0.00018113	0.303222	FALSE
ENSG00000126107.15	127	0.997908	19.081	31.717	0.182612	1:45006308:A:AT	-5016	-5016	26	37	0.614583	0.161195	-0.145504	0.101654	0.979402	0.978758	0.712072	0.000191802	0.994236	FALSE
ENSG00000281912.1	88	1.01584	21.8064	31.605	0.00236018	1:45353397:C:T	49487	49487	7	11	0.114583	0.00136355	-0.853097	0.245168	0.0476952	0.0476018	0.244097	0.000186669	0.340823	FALSE
ENSG00000186603.7	92	1.01603	27.402	32.2478	0.0427687	1:45330682:G:T	3787	3787	10	11	0.114583	0.0346936	-0.668847	0.304368	0.691831	0.692011	0.636867	0.000148729	0.88923	FALSE
ENSG00000132773.12	95	1.03805	30.3888	31.4626	0.027469	1:45309006:C:T	-31046	-31046	24	36	0.625	0.0199506	0.234356	0.0960961	0.556344	0.5538	0.596364	0.000152122	0.832677	FALSE
ENSG00000280670.3	81	0.987904	39.4207	34.0701	7.30329e-11	1:45513003:T:C	12924	12924	21	24	0.75	4.00905e-11	-1.11615	0.118552	9.999e-05	3.67019e-09	1.85734e-06	8.73434e-05	2.59332e-06	TRUE
ENSG00000132763.15	80	1.00186	41.1314	34.5381	0.0133176	1:45509418:G:GTTTTT	9116	9116	4	7	0.0729167	0.0127065	0.615762	0.234423	0.426357	0.422979	0.545086	9.11222e-05	0.761081	FALSE
ENSG00000117450.15	99	1.02527	35.3349	32.7684	0.00478459	1:45521902:C:A	-20830	-20830	10	10	0.104167	0.0035335	-0.547723	0.17509	0.149785	0.147327	0.383062	0.000121687	0.534853	FALSE
ENSG00000117448.14	97	1.04095	34.17	32.9714	0.0175343	1:45507763:A:AT	-42780	-42780	12	20	0.208333	0.0143513	-0.19853	0.0770487	0.438456	0.433995	0.548825	0.000137511	0.766301	FALSE
ENSG00000132780.17	153	1.01723	36.7445	32.7349	0.0112993	1:45598172:C:CT	14326	14326	5	8	0.0833333	0.00877347	0.547584	0.197246	0.333167	0.333229	0.507448	0.000111703	0.708528	FALSE
ENSG00000159588.15	180	0.988001	44.776	32.6791	0.00475054	1:45609499:A:AAAAC	-14558	-14558	29	38	0.604167	0.00346151	0.266189	0.0848816	0.19728	0.196704	0.425568	7.69419e-05	0.594202	FALSE
ENSG00000159592.11	147	1.01447	42.584	32.1338	0.00782258	1:45664580:A:C	-23533	-23533	8	14	0.145833	0.00547878	0.393211	0.132806	0.278572	0.277755	0.474687	9.48469e-05	0.662785	FALSE
ENSG00000159596.7	147	1.0264	42.3883	31.7161	0.0309037	1:45736821:A:C	48640	48640	3	5	0.0520833	0.0232714	0.615364	0.259326	0.724428	0.72634	0.648691	0.000102106	0.90574	FALSE
ENSG00000197429.11	30	1.02545	15.2519	33.6319	0.0124926	1:45740868:A:G	-9785	-9785	4	7	0.0729167	0.0108049	-0.729151	0.270797	0.165083	0.165396	0.396958	0.000282057	0.554255	FALSE
ENSG00000086015.23	25	0.995484	8.23468	35.1432	0.0252487	1:45740868:A:G	-46119	-46119	4	7	0.0729167	0.0255522	0.639076	0.273989	0.193981	0.191594	0.421224	0.000437981	0.588138	FALSE
ENSG00000117461.15	33	0.996827	10.6189	33.1496	0.0393998	1:46132597:C:A	-439	-439	3	5	0.0520833	0.0342145	0.637157	0.289126	0.348865	0.348923	0.513919	0.000342401	0.717564	FALSE
ENSG00000085998.15	64	0.959572	12.7902	32.1725	0.0280251	1:46191292:A:G	-29013	-29013	7	11	0.114583	0.0218559	-0.376744	0.156984	0.325067	0.32367	0.503428	0.000225214	0.702915	FALSE
ENSG00000085999.13	55	1.00506	10.3641	30.5954	0.09612	1:46293275:A:AG	46814	46814	4	5	0.0520833	0.0748264	-0.791959	0.431291	0.646335	0.647101	0.623785	0.000368503	0.870964	FALSE
ENSG00000132128.18	173	1.01449	37.9632	32.7542	0.00747643	1:46325092:T:C	21476	21476	3	6	0.0625	0.00566878	0.660134	0.223956	0.244276	0.241722	0.455745	0.000106401	0.636337	FALSE
ENSG00000173660.12	174	1.02018	35.086	31.8243	0.0297974	1:46340570:G:T	36872	36872	5	9	0.09375	0.0225954	0.407083	0.170641	0.645935	0.645682	0.623631	0.000119005	0.870749	FALSE
ENSG00000117481.11	283	1.05725	54.5015	31.253	0.000174999	1:46358511:T:C	17722	17722	14	21	0.21875	7.05359e-05	0.58647	0.130141	0.00579942	0.00709513	0.0914499	9.43286e-05	0.127688	FALSE
ENSG00000117480.16	289	1.04095	68.2851	31.6791	0.000829436	1:46364758:G:A	-29559	-29559	32	45	0.53125	0.000437817	0.545648	0.140536	0.0464954	0.0480982	0.245331	6.88337e-05	0.342546	FALSE
ENSG00000232022.10	99	1.03439	43.3801	31.9853	0.00432427	1:46388602:T:C	-43527	-43527	3	5	0.0520833	0.00281825	-0.890341	0.277098	0.158884	0.159214	0.392164	0.000104413	0.547562	FALSE
ENSG00000291138.1	100	1.02734	44.9769	32.3486	0.00266494	1:46445388:T:C	11561	11561	17	17	0.177083	0.00176945	1.06696	0.31521	0.106289	0.105423	0.338429	9.67505e-05	0.472534	FALSE
ENSG00000079277.22	161	1.04193	55.5918	31.7006	0.00011125	1:46614993:C:T	-1850	-1850	21	23	0.239583	4.83054e-05	0.659006	0.142231	0.00249975	0.00489296	0.073219	8.50077e-05	0.102233	FALSE
ENSG00000123472.13	177	1.03377	50.1663	31.4615	0.000488187	1:46720490:AAAATAAATA:A	46622	46622	25	30	0.3125	0.000232421	-0.713631	0.173986	0.0176982	0.0210427	0.164216	8.99781e-05	0.229288	FALSE
ENSG00000159658.15	180	1.04258	31.9637	30.7256	0.00508986	1:46677875:A:G	-41271	-41271	32	43	0.447917	0.00276518	0.295035	0.0916205	0.136686	0.136602	0.373956	0.000148337	0.522139	FALSE
ENSG00000224805.2	54	1.00098	18.0734	32.1222	0.000716838	1:47180174:G:T	924	924	29	40	0.583333	0.000410032	-0.574995	0.147228	0.0112989	0.0128168	0.125844	0.000206268	0.175711	FALSE
ENSG00000162366.8	71	1.00871	18.1456	30.8408	0.0892877	1:47193020:C:G	1976	1976	18	25	0.260417	0.0700095	0.316958	0.169587	0.814619	0.814441	0.672061	0.000215117	0.93837	FALSE
ENSG00000162367.12	124	1.02085	21.3775	30.411	0.0102905	1:47281006:G:C	48781	48781	7	8	0.0833333	0.00585806	0.769404	0.262159	0.189181	0.19039	0.419987	0.000196032	0.58641	FALSE
ENSG00000123473.17	61	1.01971	27.4624	34.0339	0.010127	1:47333967:G:C	19075	19075	33	44	0.458333	0.00910132	0.426927	0.154598	0.238276	0.235554	0.452041	0.000151612	0.631166	FALSE
ENSG00000162368.15	95	1.01396	39.1489	34.3828	0.0507909	1:47332459:C:T	-1331	-1331	7	11	0.114583	0.04873	-0.398359	0.19507	0.863514	0.867107	0.686663	0.000102859	0.958758	FALSE
ENSG00000237424.1	160	1.01313	17.6276	31.1292	0.0730316	1:47474408:A:T	39767	39767	24	30	0.3125	0.0571064	0.304028	0.154535	0.734627	0.732767	0.650724	0.000227269	0.908578	FALSE
ENSG00000186564.6	154	1.00231	15.8303	30.9112	0.0116307	1:47425913:T:C	-12131	-12131	3	6	0.0625	0.00720235	0.826162	0.289455	0.168883	0.16823	0.399522	0.000237372	0.557836	FALSE
ENSG00000117834.13	46	1.03866	20.6052	34.6313	0.0529633	1:48252136:T:G	29451	29451	5	10	0.104167	0.0516979	0.504951	0.250665	0.661834	0.658813	0.627602	0.000225044	0.876294	FALSE
ENSG00000272491.1	45	1.02026	21.588	35.4577	0.0266267	1:48267548:T:C	37987	37987	4	7	0.0729167	0.0276377	0.641777	0.279245	0.434757	0.431825	0.548182	0.000193461	0.765403	FALSE
ENSG00000132122.12	4	0.996125	3.87764	36.303	0.408092	1:48435539:A:G	-36669	-36669	3	6	0.0625	0.416754	-0.266243	0.323975	0.873213	0.869828	0.687461	0.000933708	0.959873	FALSE
ENSG00000185104.21	34	0.999063	8.9527	33.1044	0.0605694	1:50948459:C:T	-11808	-11808	8	15	0.15625	0.0535587	0.18971	0.0949605	0.431857	0.428879	0.547763	0.000411609	0.764819	FALSE
ENSG00000123080.12	34	1.00569	9.18279	32.7145	0.253781	1:50952376:T:C	-8369	-8369	10	18	0.1875	0.237606	-0.247422	0.205919	0.927007	0.931328	0.700499	0.000417439	0.978077	FALSE
ENSG00000123091.5	33	0.990386	10.6148	33.1133	0.154423	1:51201660:C:T	-34613	-34613	3	5	0.0520833	0.143008	0.389013	0.259627	0.826617	0.833817	0.677257	0.000329424	0.945625	FALSE
ENSG00000227070.2	14	1.01709	10.0031	34.6547	0.120584	1:51523919:A:G	5631	5631	6	9	0.09375	0.118724	0.382809	0.239347	0.719628	0.717459	0.645472	0.000409676	0.901244	FALSE
ENSG00000085832.18	13	1.00858	9.1839	35.1166	0.0644992	1:51500016:T:G	-19312	-19312	4	6	0.0625	0.0649507	-0.472468	0.247945	0.458154	0.453867	0.558842	0.000424564	0.780288	FALSE
ENSG00000117859.19	2	1.00925	1.9907	35.3628	0.509909	1:51543847:A:T	-33332	-33332	3	6	0.0625	0.512119	-0.16257	0.245464	0.755024	0.755783	0.656913	0.00196169	0.917219	FALSE
ENSG00000078618.23	110	1.00858	32.5504	31.6884	0.00300995	1:51898324:TA:T	19518	19518	5	5	0.0520833	0.00180754	-0.645222	0.191056	0.090291	0.0912775	0.317976	0.000119846	0.443976	FALSE
ENSG00000117862.13	51	1.02425	15.8532	31.9912	0.0208632	1:52061636:CT:C	6444	6444	11	20	0.791667	0.015595	-0.306249	0.120464	0.279572	0.273421	0.472538	0.00026951	0.659784	FALSE
ENSG00000134717.18	51	1.03359	16.0776	31.6956	0.0690123	1:52047372:A:G	-8827	-8827	17	33	0.34375	0.0558524	0.231748	0.117167	0.675632	0.670245	0.630881	0.000280247	0.880872	FALSE
ENSG00000154222.15	88	0.997351	16.9194	31.4735	0.019305	1:52354216:A:G	-11989	-11989	28	40	0.583333	0.0135444	0.412281	0.158538	0.286271	0.282136	0.477626	0.000215579	0.666889	FALSE
ENSG00000085840.13	67	1.00961	17.1019	31.0506	0.0687359	1:52438738:T:C	34315	34315	5	5	0.0520833	0.0530909	0.844709	0.421949	0.70083	0.700556	0.639543	0.000229456	0.892966	FALSE
ENSG00000134748.13	66	1.00684	17.7461	32.2731	0.00126837	1:52418018:T:TC	13416	13416	8	8	0.0833333	0.000783909	1.14148	0.310367	0.0206979	0.0216413	0.166038	0.000217538	0.231831	FALSE
ENSG00000134744.14	26	1.00099	10.9844	34.212	0.119833	1:52551773:G:A	-1714	-1714	4	6	0.0625	0.115593	-0.219704	0.136157	0.748925	0.753596	0.656446	0.000339379	0.916568	FALSE
ENSG00000116157.6	120	1.04366	38.8019	31.6121	0.000456701	1:52608860:C:A	6489	6489	28	36	0.625	0.000223631	-0.506082	0.122988	0.0109989	0.0144598	0.133812	0.000122947	0.186835	FALSE
ENSG00000182183.15	172	1.04381	64.6647	32.2712	0.00894676	1:52648646:G:A	15478	15478	9	14	0.145833	0.00645018	0.274886	0.0948732	0.431357	0.41964	0.543631	7.38537e-05	0.759048	FALSE
ENSG00000162377.6	113	1.01618	53.0735	33.2622	0.0130693	1:52736275:TTTTA:T	37928	37928	3	6	0.0625	0.010871	0.776147	0.288515	0.50265	0.494785	0.57416	7.687e-05	0.801676	FALSE
ENSG00000162378.13	76	1.0164	39.7021	33.6044	0.0584367	1:52732088:C:G	5635	5635	4	7	0.0729167	0.0533752	0.438995	0.219563	0.906209	0.905806	0.694827	0.000102885	0.970157	FALSE
ENSG00000228929.1	60	1.02683	36.3978	34.2968	0.00679452	1:52794258:G:T	21610	21610	3	5	0.0520833	0.0062427	-0.905822	0.311263	0.209879	0.208975	0.43512	0.000119197	0.60754	FALSE
ENSG00000121310.17	80	0.997809	13.5055	31.1021	0.0168353	1:52959199:T:A	31987	31987	4	5	0.0520833	0.0111526	0.6313	0.235578	0.210679	0.205778	0.4321	0.000270817	0.603323	FALSE
ENSG00000116171.19	80	0.975552	14.382	32.4069	8.13706e-06	1:52892396:G:T	-34880	-34880	6	6	0.0625	3.49897e-06	1.1674	0.212164	0.00019998	0.000147379	0.00675234	0.000221767	0.00942801	TRUE
ENSG00000174348.14	132	1.01442	33.8679	33.0662	0.0158585	1:53045303:G:A	-16749	-16749	3	6	0.0625	0.0130388	-0.815167	0.311591	0.415158	0.411086	0.539599	0.000119215	0.753418	FALSE
ENSG00000162383.13	48	0.981121	4.95293	33.5835	0.00137352	1:53093008:C:A	-49630	-49630	13	20	0.791667	0.00108344	0.718171	0.201595	0.00659934	0.00750024	0.0941406	0.00066742	0.131444	FALSE
ENSG00000157184.7	60	1.00017	18.4093	31.482	0.0619229	1:53211447:A:C	14655	14655	4	5	0.0520833	0.0488443	0.639173	0.313161	0.690031	0.691665	0.636867	0.000201523	0.88923	FALSE
ENSG00000236723.2	71	0.981727	19.8228	32.0979	0.145659	1:53224984:GT:G	11209	11209	13	17	0.177083	0.128419	-0.381708	0.245124	0.957104	0.957381	0.706749	0.000167204	0.986803	FALSE
ENSG00000162384.14	87	1.01526	19.5241	30.9542	0.000637676	1:53226765:T:A	6131	6131	5	7	0.0729167	0.00027834	-0.991988	0.245564	0.009999	0.011504	0.118481	0.000207774	0.16543	FALSE
ENSG00000162385.11	100	0.991117	24.0098	31.6308	0.0473657	1:53230210:T:C	-8308	-8308	7	11	0.114583	0.0368406	-0.389622	0.17951	0.686231	0.691538	0.636867	0.000146269	0.88923	FALSE
ENSG00000225675.2	86	1.02331	24.0997	32.5792	0.139283	1:53341668:T:C	13435	13435	10	16	0.166667	0.125222	0.302431	0.192531	0.969103	0.971793	0.710293	0.000176386	0.991752	FALSE
ENSG00000157193.18	86	1.01792	23.3204	32.1458	0.0132095	1:53338878:C:T	10409	10409	5	6	0.0625	0.00967158	0.709185	0.259091	0.258374	0.258819	0.464761	0.000176682	0.648926	FALSE
ENSG00000230138.2	66	0.994625	13.8998	31.4911	0.000322113	1:53369627:T:C	1382	1382	20	24	0.25	0.000147738	0.727148	0.170833	0.00389961	0.0046094	0.0707557	0.000258124	0.0987932	TRUE
ENSG00000058804.12	57	1.00735	33.4128	33.8594	0.0209923	1:53888150:C:T	49687	49687	5	8	0.0833333	0.0189134	0.457585	0.185905	0.50035	0.504305	0.576763	0.000115905	0.80531	FALSE
ENSG00000058799.15	105	1.03602	48.8206	33.5497	0.0185242	1:53910028:C:T	20230	20230	3	5	0.0520833	0.0161255	0.291099	0.115135	0.588941	0.58262	0.605762	9.36392e-05	0.8458	FALSE
ENSG00000081870.12	125	1.00899	16.3357	31.7556	0.130258	1:53923297:T:TAATA	-22402	-22402	4	6	0.0625	0.111913	-0.667673	0.40943	0.891711	0.896163	0.692163	0.000239337	0.966437	FALSE
ENSG00000116212.15	125	0.99312	16.7787	32.0468	0.00622611	1:53939219:A:G	-6866	-6866	5	7	0.0729167	0.00422649	0.785469	0.256659	0.10189	0.101337	0.332808	0.000211887	0.464685	FALSE
ENSG00000116209.12	79	1.01677	19.4342	30.9012	0.00920249	1:54034689:G:A	-18815	-18815	10	16	0.166667	0.00553095	-0.251909	0.085187	0.159784	0.158588	0.391662	0.00021058	0.546861	FALSE
ENSG00000116205.14	79	1.01081	19.4172	31.0306	0.0711485	1:54102858:C:A	49274	49274	5	8	0.0833333	0.0550847	0.510229	0.257108	0.757624	0.757913	0.657331	0.000203539	0.917803	FALSE
ENSG00000116221.15	169	1.04678	51.6906	31.1348	0.00372618	1:54222352:G:GC	38311	38311	15	18	0.1875	0.00208472	-0.597784	0.179796	0.154485	0.158914	0.39209	9.39147e-05	0.547459	FALSE
ENSG00000157216.17	82	1.01657	34.0289	32.7656	0.013336	1:54393091:A:G	-20388	-20388	20	33	0.34375	0.0105009	0.264221	0.0977101	0.360664	0.358825	0.517812	0.000120151	0.722999	FALSE
ENSG00000162390.18	57	1.00837	12.176	31.9084	0.0903826	1:54582100:T:C	39843	39843	6	10	0.104167	0.0759407	-0.336882	0.184196	0.686031	0.681248	0.633843	0.000319889	0.885008	FALSE
ENSG00000243725.7	166	1.01746	38.2883	31.8551	0.000279281	1:54733426:A:T	17565	17565	7	11	0.114583	0.000138106	0.889705	0.207904	0.00959904	0.00975596	0.108291	0.000107344	0.151203	FALSE
ENSG00000162396.6	211	1.06307	56.1651	31.3898	0.0203033	1:54766585:T:C	2062	2062	22	30	0.3125	0.0141866	-0.44066	0.170703	0.668833	0.659078	0.627708	9.44567e-05	0.876441	FALSE
ENSG00000006555.11	242	1.03239	58.0358	32.0884	0.0178029	1:54834828:G:A	33505	33505	7	9	0.09375	0.0132697	0.468894	0.179726	0.639736	0.633858	0.620228	7.71756e-05	0.865998	FALSE
ENSG00000162398.12	243	1.03425	59.5044	31.9477	0.0336863	1:54818588:G:A	12525	12525	3	6	0.0625	0.0261185	0.638758	0.274977	0.859914	0.862502	0.685664	7.60685e-05	0.957363	FALSE
ENSG00000116133.13	170	1.04916	38.5171	31.8103	0.0241022	1:54843681:A:G	-43514	-43514	10	15	0.15625	0.0179063	-0.493333	0.198567	0.592641	0.587749	0.606814	0.000127677	0.847268	FALSE
ENSG00000162402.15	69	1.03758	20.0378	32.2942	0.00764894	1:55218724:A:G	3346	3346	6	7	0.0729167	0.00546435	-0.507253	0.171264	0.133687	0.130695	0.368186	0.000230015	0.514082	FALSE
ENSG00000184292.7	180	1.04182	36.353	32.7408	2.09763e-05	1:58578736:A:C	1484	1484	19	27	0.28125	1.07938e-05	0.761575	0.148425	0.00069993	0.000554693	0.0167815	0.000129887	0.0234313	TRUE
ENSG00000162601.12	209	1.00989	41.6294	31.6717	0.00779056	1:58654907:G:A	-45183	-45183	15	16	0.833333	0.00511972	-0.457967	0.153323	0.274073	0.27348	0.472566	9.44415e-05	0.659824	FALSE
ENSG00000177606.8	31	1.01408	8.14904	33.4377	0.00288196	1:58820837:T:C	36789	36789	3	5	0.0520833	0.00228938	-1.0879	0.330642	0.0191981	0.0219335	0.166935	0.000494069	0.233084	FALSE
ENSG00000234807.8	31	0.995979	8.04028	33.4808	0.100012	1:58817444:A:C	33060	33060	3	6	0.0625	0.0925228	-0.337925	0.195384	0.573943	0.573173	0.602922	0.00044991	0.841834	FALSE
ENSG00000232453.7	34	0.942131	5.6045	34.3557	0.059738	1:58909364:C:CTT	-22534	-22534	3	5	0.0520833	0.0573614	0.758827	0.386123	0.316468	0.318223	0.500054	0.000459336	0.698204	FALSE
ENSG00000172456.18	33	0.97911	10.7324	34.3867	0.0645739	1:59280118:T:C	-16520	-16520	4	8	0.0833333	0.0622036	-0.350399	0.181891	0.517848	0.521272	0.584461	0.000303939	0.816058	FALSE
ENSG00000134709.13	37	0.950418	4.04791	36.3263	0.000107573	1:59778992:TA:T	-35794	-35794	3	6	0.0625	0.000144386	0.73894	0.173286	0.00039996	0.000648387	0.0188971	0.000672769	0.0263853	TRUE
ENSG00000162604.12	151	1.03061	46.5041	32.471	0.00132861	1:61686101:A:G	-39322	-39322	5	8	0.0833333	0.000855513	0.516029	0.141502	0.0506949	0.0543261	0.257971	9.53367e-05	0.360194	FALSE
ENSG00000132849.22	133	1.0148	43.2614	33.6236	0.00115085	1:61721913:G:A	-20564	-20564	3	5	0.0520833	0.000907932	-0.35876	0.0989513	0.0434957	0.0461915	0.24009	9.35427e-05	0.335228	FALSE
ENSG00000240563.2	87	1.02546	29.4461	33.1996	0.00396858	1:62191248:AT:A	-3601	-3601	3	5	0.0520833	0.00308793	0.866534	0.272587	0.10239	0.10345	0.335785	0.00014617	0.468842	FALSE
ENSG00000162607.13	94	1.00371	20.17	32.7349	0.0731753	1:62482024:A:T	45727	45727	4	7	0.0729167	0.0637971	0.263363	0.137583	0.781822	0.782926	0.664677	0.000187872	0.92806	FALSE
ENSG00000116641.18	36	1.03007	9.18738	33.526	0.11876	1:62680137:G:A	-8249	-8249	6	11	0.114583	0.110842	-0.400013	0.244535	0.673533	0.675659	0.63264	0.000480379	0.883328	FALSE
ENSG00000125703.15	101	1.03583	19.9867	32.0371	0.00713188	1:62749542:T:C	-34590	-34590	3	6	0.0625	0.0048912	-0.511264	0.170166	0.121488	0.122352	0.359048	0.000228349	0.501323	FALSE
ENSG00000088035.18	44	1.03127	15.8942	32.6087	0.00487652	1:63414754:A:C	47179	47179	18	26	0.270833	0.00352321	0.413605	0.13217	0.0652935	0.0681142	0.282816	0.000279786	0.394884	FALSE
ENSG00000203965.13	65	1.03262	24.0399	33.5542	0.0187962	1:63499239:G:A	-24133	-24133	3	6	0.0625	0.0163789	-0.517388	0.205165	0.356764	0.350894	0.514524	0.000186473	0.718409	FALSE
ENSG00000079739.17	76	1.03255	35.0988	33.6088	0.000519302	1:63552475:T:C	-40936	-40936	3	6	0.0625	0.00039603	-0.772619	0.19722	0.0124988	0.0156415	0.138428	0.000127699	0.193281	FALSE
ENSG00000142856.17	76	1.01583	35.8902	33.9359	0.0298163	1:63587897:T:G	-5824	-5824	21	29	0.697917	0.0273275	-0.344215	0.149451	0.658434	0.656113	0.626871	0.000113431	0.875274	FALSE
ENSG00000162437.15	1	0.998526	0.996998	34.4806	0.50824	1:64792296:C:T	47221	47221	11	14	0.145833	0.505017	-0.180576	0.268094	0.514049	0.507698	0.578299	0.00368021	0.807454	FALSE
ENSG00000162434.14	261	1.02161	37.9112	29.793	0.00423674	1:65035960:C:T	-31794	-31794	8	9	0.09375	0.00191171	-0.527223	0.15707	0.144286	0.141516	0.379082	0.000111054	0.529297	FALSE
ENSG00000288804.1	261	1.03946	38.3502	29.7925	0.0514173	1:65019681:C:T	-48127	-48127	11	17	0.177083	0.0345168	-0.513231	0.233309	0.855914	0.859402	0.68492	0.000121515	0.956325	FALSE
ENSG00000162433.15	15	0.963775	6.39493	35.2925	0.147478	1:65106113:CA:C	-41438	-41438	8	9	0.09375	0.14919	0.371001	0.251551	0.650335	0.654045	0.626383	0.000463406	0.874592	FALSE
ENSG00000116678.20	120	1.03373	37.8767	32.0166	2.83821e-05	1:65431186:C:A	10533	10533	6	6	0.0625	1.18928e-05	1.58079	0.31002	0.00059994	0.000841195	0.0227313	0.000119131	0.0317388	TRUE
ENSG00000184588.18	23	0.957381	3.96555	36.9127	0.407234	1:65832049:C:T	39535	39535	4	8	0.0833333	0.419831	-0.181515	0.222354	0.878612	0.881822	0.689057	0.000718471	0.962101	FALSE
ENSG00000152760.10	54	0.999095	3.84289	32.6468	0.0140748	1:66781259:G:A	28800	28800	5	8	0.0833333	0.010972	0.61712	0.22972	0.0537946	0.05317	0.254825	0.000958898	0.355802	FALSE
ENSG00000198160.15	82	0.998491	26.4684	33.2102	0.00370108	1:66941970:C:CA	17075	17075	23	33	0.65625	0.00287417	0.303015	0.0945221	0.0935906	0.0938698	0.321861	0.000138758	0.449401	FALSE
ENSG00000116704.8	64	1.02228	26.7401	34.3111	0.083908	1:67015554:C:T	-38594	-38594	5	9	0.09375	0.0808174	-0.213029	0.118485	0.90351	0.900327	0.69362	0.000158037	0.968472	FALSE
ENSG00000081985.14	44	1.02319	17.8297	34.1005	0.0182216	1:67313388:G:A	6024	6024	7	14	0.145833	0.0167356	0.510672	0.203227	0.268673	0.269346	0.469565	0.000238202	0.655633	FALSE
ENSG00000142864.15	73	0.987314	22.2252	32.474	0.125775	1:67389614:A:G	-40801	-40801	3	5	0.0520833	0.111771	-0.414168	0.253871	0.950705	0.950772	0.70451	0.000154372	0.983677	FALSE
ENSG00000116717.13	77	0.94758	4.82048	33.5611	0.160521	1:67686680:G:A	1479	1479	5	9	0.09375	0.151708	0.303037	0.206779	0.582642	0.592338	0.607806	0.000554054	0.848654	FALSE
ENSG00000116729.14	114	1.04867	35.4681	31.5011	0.00737215	1:68204611:A:T	-28509	-28509	6	9	0.09375	0.00470396	0.750544	0.248568	0.213379	0.21118	0.436402	0.000138272	0.609329	FALSE
ENSG00000229133.1	77	1.05809	25.9743	31.8388	0.00865917	1:68222014:C:T	-21041	-21041	3	6	0.0625	0.00588028	-0.685224	0.233593	0.184782	0.180373	0.41137	0.000198706	0.574379	FALSE
ENSG00000024526.17	31	0.983955	2.71661	35.0581	0.508832	1:68468061:A:G	-29160	-29160	4	6	0.0625	0.509188	-0.221043	0.331432	0.850615	0.858058	0.684659	0.00123934	0.95596	FALSE
ENSG00000066557.6	65	1.01104	14.0728	31.6051	0.0149128	1:70220530:A:G	14951	14951	9	10	0.104167	0.0103521	-0.502032	0.18526	0.190881	0.186421	0.415843	0.000281177	0.580624	FALSE
ENSG00000116754.14	65	1.0185	13.6866	31.0837	0.00624211	1:70242165:T:TA	36483	36483	7	8	0.0833333	0.00367828	-0.413196	0.132729	0.0769923	0.0778816	0.298495	0.000301961	0.416777	FALSE
ENSG00000118454.13	25	1.012	10.6197	34.014	0.0077192	1:70355645:C:CTT	911	911	5	7	0.0729167	0.00687168	-0.447466	0.155768	0.0759924	0.0762976	0.295841	0.000374641	0.41307	FALSE
ENSG00000197568.15	25	1.01852	10.4939	33.6689	6.77828e-06	1:70343249:C:T	-11537	-11537	3	6	0.0625	4.43531e-06	-0.955878	0.176222	0.00019998	5.91772e-05	0.00336143	0.000393779	0.00469342	TRUE
ENSG00000116761.12	57	0.99606	7.07501	31.6182	0.0608063	1:70445060:C:T	33842	33842	4	6	0.0625	0.0483688	0.711243	0.347694	0.361464	0.360263	0.518399	0.000511543	0.723819	FALSE
ENSG00000132485.14	133	1.02287	22.3015	31.1053	0.00759913	1:71054420:C:T	-26869	-26869	7	9	0.09375	0.00459621	-0.420797	0.138953	0.146685	0.148681	0.384391	0.000190117	0.536709	FALSE
ENSG00000272864.1	130	1.02136	42.8983	32.3747	0.00412505	1:74711244:C:T	11911	11911	16	21	0.21875	0.00284354	-0.678136	0.211273	0.156384	0.155055	0.389087	9.8006e-05	0.543266	FALSE
ENSG00000162623.16	176	1.04919	49.4127	31.8613	0.0147052	1:74766547:G:T	33395	33395	24	32	0.333333	0.0105075	-0.424977	0.157173	0.50215	0.495901	0.574346	9.9556e-05	0.801934	FALSE
ENSG00000116791.14	176	1.02496	48.9795	31.8756	0.00332394	1:74782438:G:A	49030	49030	24	32	0.666667	0.002079	-0.354056	0.106457	0.142286	0.142166	0.379588	8.76419e-05	0.530003	FALSE
ENSG00000117054.15	103	1.03715	26.8503	33.4152	0.00688263	1:75755442:T:C	31011	31011	4	7	0.0729167	0.00566214	0.464978	0.157723	0.157184	0.156279	0.3901	0.000171286	0.54468	FALSE
ENSG00000137955.16	135	1.03024	35.9593	32.1945	0.0245348	1:75833496:G:A	47299	47299	4	7	0.0729167	0.0189752	-0.582755	0.236891	0.584842	0.577168	0.603702	0.000123021	0.842923	FALSE
ENSG00000184005.11	65	1.04153	20.2239	32.0852	0.0499444	1:76079728:C:T	4982	4982	6	10	0.104167	0.040475	0.260951	0.122641	0.634537	0.627979	0.618689	0.000232982	0.863849	FALSE
ENSG00000226415.1	101	0.958543	4.7883	32.1765	0.0447707	1:76649789:A:T	-50000	-50000	5	6	0.0625	0.0362335	-0.73977	0.33966	0.218078	0.21305	0.437932	0.000599011	0.611466	FALSE
ENSG00000226084.5	61	1.02536	21.4818	33.3543	0.0040394	1:77085261:T:G	-43853	-43853	15	17	0.177083	0.00321748	-0.759786	0.240172	0.0756924	0.0774267	0.297925	0.000200211	0.415979	FALSE
ENSG00000142892.15	44	1.02148	21.8524	35.2541	0.000837062	1:77221814:T:C	2384	2384	7	10	0.104167	0.000874674	0.512813	0.140925	0.0146985	0.0164933	0.142531	0.000192474	0.19901	FALSE
ENSG00000154027.19	45	1.03906	18.5353	34.2898	0.0348599	1:77325778:T:G	43759	43759	7	13	0.135417	0.0330043	0.275385	0.124057	0.467353	0.463462	0.562896	0.000250706	0.785948	FALSE
ENSG00000036549.13	91	1.00623	27.4731	32.2824	0.00772556	1:77639901:AT:A	-43518	-43518	5	7	0.0729167	0.00551458	0.441199	0.14914	0.190381	0.189515	0.419238	0.000140024	0.585365	FALSE
ENSG00000077254.14	43	1.00297	14.3663	32.9831	0.00863906	1:77712920:A:G	-46932	-46932	4	5	0.0520833	0.00680429	0.546877	0.190118	0.113089	0.116325	0.352284	0.000262589	0.491879	FALSE
ENSG00000180488.16	41	1.01319	13.1458	33.2542	0.107741	1:77737056:A:C	-42568	-42568	3	6	0.0625	0.0987949	0.273367	0.161198	0.770523	0.772498	0.660711	0.000304809	0.922523	FALSE
ENSG00000162614.19	64	1.02043	18.5417	32.4332	0.0240783	1:77864832:C:T	-23681	-23681	3	5	0.0520833	0.0190398	-0.590559	0.240204	0.360664	0.353943	0.51591	0.000225446	0.720343	FALSE
ENSG00000235927.4	65	1.00114	18.5982	32.8704	0.0163928	1:77847486:A:G	-42053	-42053	4	7	0.0729167	0.013223	0.696102	0.266666	0.265973	0.264144	0.466794	0.000200641	0.651765	FALSE
ENSG00000162613.18	62	1.04404	23.7993	32.2654	0.0114458	1:77933527:T:C	-45583	-45583	3	5	0.0520833	0.00840544	-0.412418	0.147652	0.219278	0.221571	0.443001	0.000200794	0.618543	FALSE
ENSG00000137959.17	89	1.03279	34.5735	31.1901	0.0152434	1:78614351:T:C	-5551	-5551	5	5	0.947917	0.0100914	0.871106	0.320242	0.40036	0.396272	0.534411	0.000129815	0.746175	FALSE
ENSG00000137965.11	177	1.02618	37.5346	30.969	0.00929926	1:78623411:T:G	-26385	-26385	12	14	0.145833	0.00564943	0.46344	0.157155	0.293571	0.283984	0.478754	0.000115159	0.668463	FALSE
ENSG00000271576.2	26	1.02767	8.92178	33.0838	0.0538561	1:84126696:C:T	48735	48735	5	7	0.0729167	0.0472722	0.655544	0.318802	0.382262	0.376846	0.526623	0.000487977	0.735302	FALSE
ENSG00000142875.20	26	0.996098	9.17218	34.42	0.020992	1:84108555:G:A	30493	30493	3	5	0.0520833	0.0199243	0.316872	0.129901	0.182682	0.178257	0.408887	0.000394671	0.570912	FALSE
ENSG00000117133.11	179	1.03176	43.9655	31.2418	0.00605656	1:84493309:T:A	14050	14050	11	12	0.125	0.00364277	-0.600776	0.192758	0.221778	0.221302	0.443001	0.0001015	0.618543	FALSE
ENSG00000122432.19	246	1.01475	51.1716	30.5402	0.00655167	1:84507751:T:A	1451	1451	26	39	0.40625	0.0035736	-0.456912	0.146259	0.280872	0.279001	0.475465	7.90622e-05	0.663871	FALSE
ENSG00000285851.1	238	1.03703	49.9948	30.2575	0.0140946	1:84531570:CT:C	-25118	-25118	19	28	0.291667	0.00821433	0.275749	0.0984008	0.49675	0.49062	0.573093	9.19622e-05	0.800185	FALSE
ENSG00000284882.2	179	0.992076	40.4229	31.4746	0.00270962	1:84582958:C:T	8844	8844	34	46	0.520833	0.00155162	-0.480375	0.139937	0.108589	0.10608	0.338888	8.73861e-05	0.473175	FALSE
ENSG00000117151.13	178	1.01783	39.4054	30.6434	0.0394231	1:84535887:C:T	-38593	-38593	8	12	0.125	0.0275592	0.406287	0.176685	0.786621	0.789729	0.665883	0.000104527	0.929744	FALSE
ENSG00000117155.17	54	1.03457	18.1218	32.7809	0.0265252	1:84679786:G:A	-11017	-11017	7	12	0.125	0.0218257	-0.481107	0.200422	0.376062	0.369286	0.523546	0.000250044	0.731005	FALSE
ENSG00000153898.13	83	1.02992	29.9912	34.4698	0.011848	1:85003931:G:A	6818	6818	3	6	0.0625	0.0112065	0.565708	0.211255	0.292171	0.287044	0.480949	0.000147219	0.671529	FALSE
ENSG00000055732.13	86	1.03234	14.4334	33.7514	0.000439497	1:85017881:G:GC	-30619	-30619	3	6	0.0625	0.000342939	-0.967817	0.243936	0.00359964	0.005301	0.0762504	0.000309937	0.106465	FALSE
ENSG00000280099.1	37	1.04397	14.1704	33.6989	0.0171739	1:85153177:G:A	-1026	-1026	3	5	0.0520833	0.0151326	-0.773544	0.302787	0.20178	0.200486	0.428931	0.000336875	0.598898	FALSE
ENSG00000162642.14	138	1.02393	33.0383	30.4812	0.00567236	1:85222010:A:G	-37662	-37662	4	5	0.0520833	0.00300556	0.820144	0.257175	0.164984	0.162802	0.39549	0.000129144	0.552205	FALSE
ENSG00000142867.14	125	1.02903	33.3602	30.428	0.0718754	1:85267691:C:T	-8941	-8941	9	9	0.09375	0.0533036	-0.482013	0.241002	0.913609	0.912662	0.696291	0.00013169	0.972201	FALSE
ENSG00000117174.11	71	1.0241	12.2904	33.812	0.180318	1:85694562:C:T	-13871	-13871	3	6	0.0625	0.172741	0.218994	0.157337	0.909309	0.909615	0.695634	0.00034725	0.971285	FALSE
ENSG00000285210.1	101	1.03655	34.2495	31.3122	0.0524645	1:86357515:C:T	36804	36804	9	13	0.135417	0.0401664	0.512334	0.24039	0.836516	0.833068	0.676945	0.000133852	0.94519	FALSE
ENSG00000122417.16	217	1.04332	38.0307	30.5147	0.00412044	1:86365443:C:T	-30900	-30900	6	6	0.0625	0.0021011	-0.871736	0.26242	0.133087	0.131457	0.369212	0.000125202	0.515514	FALSE
ENSG00000097033.15	148	1.03663	21.6508	31.4349	0.126394	1:86725211:T:C	20641	20641	4	5	0.0520833	0.106501	0.2578	0.155602	0.943306	0.94266	0.702963	0.000211763	0.981518	FALSE
ENSG00000183291.18	113	1.04269	32.441	30.7383	0.0633407	1:86956189:T:TA	41765	41765	4	6	0.0625	0.0473367	0.355508	0.172942	0.871113	0.871786	0.68758	0.000146245	0.960039	FALSE
ENSG00000153936.18	112	1.04686	33.0581	30.9921	0.023009	1:86864961:A:AT	-49674	-49674	6	6	0.0625	0.0156058	-0.674698	0.265424	0.519448	0.514986	0.581256	0.000146872	0.811583	FALSE
ENSG00000143013.13	47	1.01962	20.1572	33.5139	0.0503597	1:87360735:G:A	31855	31855	6	11	0.114583	0.0454529	-0.339164	0.163494	0.639736	0.638983	0.6218	0.000206419	0.868193	FALSE
ENSG00000065243.20	81	1.0114	27.4351	33.0844	0.0522606	1:88686528:A:G	2306	2306	4	7	0.0729167	0.0458035	0.287603	0.138877	0.763824	0.767027	0.65941	0.000144572	0.920706	FALSE
ENSG00000137947.12	161	1.03677	31.4964	30.8133	0.0218032	1:88845767:T:C	-46177	-46177	6	9	0.09375	0.0144057	0.424989	0.165036	0.492751	0.483154	0.570914	0.000145725	0.797143	FALSE
ENSG00000137944.18	238	1.02086	61.3883	31.7431	0.0507177	1:89040059:C:G	47106	47106	18	28	0.291667	0.0400594	0.266252	0.124856	0.955604	0.957346	0.706749	6.82949e-05	0.986803	FALSE
ENSG00000117226.12	220	1.0199	49.0936	30.537	7.35985e-08	1:89009452:C:T	-13442	-13442	17	21	0.21875	8.04175e-09	-0.641688	0.0852307	9.999e-05	2.79232e-06	0.000337911	8.49199e-05	0.000471811	TRUE
ENSG00000117228.11	232	1.03005	37.6914	29.7741	0.101016	1:89078757:C:T	13397	13397	3	5	0.0520833	0.0750325	-0.274216	0.149445	0.979102	0.98076	0.712246	0.000117243	0.994479	FALSE
ENSG00000234518.2	178	1.00855	20.7564	29.9387	0.0701286	1:89147247:G:A	42480	42480	26	34	0.645833	0.0499336	-0.202073	0.0995078	0.772423	0.776258	0.662299	0.00018789	0.92474	FALSE
ENSG00000162645.13	146	0.988508	17.4095	30.4078	0.0120661	1:89165510:GA:G	15054	15054	7	7	0.0729167	0.00701894	0.428509	0.149602	0.19648	0.194936	0.423875	0.000198535	0.591838	FALSE
ENSG00000284734.1	102	1.00541	32.9544	32.9474	0.0163914	1:89188037:C:T	-10677	-10677	8	13	0.135417	0.0133311	0.464698	0.178247	0.422358	0.417327	0.542508	0.000116169	0.757481	FALSE
ENSG00000162654.9	102	1.03386	31.3327	32.1594	0.0183407	1:89177294:G:GT	-21648	-21648	12	12	0.125	0.0138103	0.430446	0.166033	0.428157	0.423824	0.545563	0.000144103	0.761746	FALSE
ENSG00000237568.1	85	1.01819	34.8145	32.2459	0.0212414	1:89235531:A:G	-25051	-25051	3	5	0.0520833	0.0163293	-0.737735	0.292394	0.521248	0.51788	0.58275	0.000118555	0.813669	FALSE
ENSG00000154451.15	82	1.00548	34.1302	32.9686	0.0320004	1:89254857:C:G	-18003	-18003	23	35	0.635417	0.0270743	-0.189144	0.0819775	0.668633	0.668247	0.630754	0.000112214	0.880695	FALSE
ENSG00000233235.1	42	1.03238	16.8175	33.8209	0.138165	1:89302010:C:T	-22512	-22512	8	14	0.145833	0.131386	-0.326954	0.211646	0.914809	0.913323	0.696453	0.000266107	0.972427	FALSE
ENSG00000183347.15	75	1.0309	26.6184	33.9546	0.0115052	1:89388554:GA:G	24495	24495	4	6	0.0625	0.0102841	-0.486716	0.179432	0.257174	0.251764	0.460372	0.000166787	0.642797	FALSE
ENSG00000290525.1	154	1.01976	34.8846	33.3601	0.0413364	1:89384183:A:T	-23496	-23496	13	18	0.8125	0.0365812	0.247061	0.113661	0.765423	0.764332	0.65889	0.0001194	0.91998	FALSE
ENSG00000225492.7	157	1.01675	33.6354	32.6943	0.044778	1:89379036:A:G	-31283	-31283	3	5	0.0520833	0.0377715	-0.378648	0.175365	0.778122	0.780675	0.663902	0.000121684	0.926978	FALSE
ENSG00000197147.15	82	1.01455	28.4505	33.1161	0.00124664	1:89535141:G:T	10312	10312	4	6	0.0625	0.000900679	0.932459	0.256983	0.0316968	0.0330124	0.203509	0.000142016	0.284152	FALSE
ENSG00000231999.8	185	1.0333	54.6037	31.5673	0.0270342	1:89628800:T:C	-4203	-4203	24	35	0.364583	0.0198103	-0.340767	0.139557	0.769923	0.765469	0.65904	8.24489e-05	0.92019	FALSE
ENSG00000272931.1	92	1.05206	46.8176	33.5975	0.0235442	1:89842542:A:C	21674	21674	9	13	0.135417	0.0207805	0.508877	0.210155	0.653735	0.651277	0.625259	0.000106739	0.873022	FALSE
ENSG00000171492.14	92	1.01886	47.1645	33.9079	0.0040191	1:89827345:C:CA	6329	6329	6	8	0.0833333	0.00346372	0.526398	0.167869	0.167283	0.166187	0.397745	8.78601e-05	0.555355	FALSE
ENSG00000162664.17	57	1.03051	17.7714	33.0923	0.0360545	1:90036110:A:G	41000	41000	20	27	0.28125	0.0310238	0.270959	0.120569	0.469553	0.464829	0.563574	0.000249185	0.786895	FALSE
ENSG00000122482.22	103	1.02394	31.4781	32.6655	0.010753	1:91008087:T:A	-14185	-14185	4	6	0.0625	0.00825355	-0.371619	0.132701	0.285571	0.277744	0.474687	0.00013555	0.662785	FALSE
ENSG00000162669.16	96	0.927945	4.27046	36.6499	0.203424	1:91427548:A:G	22692	22692	5	8	0.0833333	0.214052	0.34129	0.269687	0.632937	0.650217	0.625103	0.000548698	0.872805	FALSE
ENSG00000097046.13	77	0.996798	21.1074	34.3006	0.0509381	1:91545910:G:T	45059	45059	3	6	0.0625	0.0485998	-0.460962	0.225588	0.664634	0.669581	0.630754	0.00017223	0.880695	FALSE
ENSG00000069702.11	47	0.984868	11.8592	34.162	0.0192321	1:91861124:A:G	-45211	-45211	6	12	0.125	0.0177905	0.350257	0.140825	0.214779	0.211731	0.436936	0.000285037	0.610076	FALSE
ENSG00000189195.15	19	0.96135	3.55749	36.6067	0.270796	1:92067829:G:A	-12476	-12476	4	7	0.0729167	0.281723	0.342291	0.313076	0.674833	0.688671	0.636303	0.000821873	0.888443	FALSE
ENSG00000174842.17	42	1.00091	19.1147	33.3478	0.0462365	1:92256906:G:GCAAT	-42081	-42081	3	5	0.0520833	0.0410799	0.41123	0.193885	0.59714	0.595009	0.608743	0.000194951	0.849961	FALSE
ENSG00000122484.9	42	1.0015	19.0119	33.2391	0.0258876	1:92262053:T:G	-37006	-37006	12	20	0.208333	0.0221959	0.299714	0.125232	0.393861	0.391932	0.532059	0.000196699	0.742891	FALSE
ENSG00000162676.13	127	0.993487	26.5055	31.2737	0.0384767	1:92510466:T:G	23541	23541	15	16	0.833333	0.0284214	0.428235	0.18733	0.652835	0.64925	0.624644	0.000134426	0.872164	FALSE
ENSG00000067208.17	57	1.01111	18.6011	33.6891	0.0876495	1:92779423:C:T	-12981	-12981	4	8	0.0833333	0.0816275	-0.218171	0.121683	0.814019	0.815484	0.672306	0.000212841	0.938712	FALSE
ENSG00000122406.14	49	0.988785	14.6599	33.2279	0.134209	1:92842351:T:A	10338	10338	12	12	0.875	0.12412	-0.295816	0.187751	0.879512	0.881248	0.689057	0.000236183	0.962101	FALSE
ENSG00000154511.12	110	1.03383	25.5927	31.8485	0.0429497	1:92974310:A:ATTTATTTAT	12785	12785	12	12	0.125	0.0337144	-0.443202	0.200515	0.665033	0.661411	0.628246	0.000176369	0.877193	FALSE
ENSG00000143033.18	150	1.01006	27.6585	30.8723	0.0806439	1:93055274:A:C	-23961	-23961	13	15	0.15625	0.0626248	0.322571	0.167729	0.89911	0.900593	0.69362	0.000142277	0.968472	FALSE
ENSG00000122483.18	130	1.01163	40.6733	32.759	0.00121063	1:93158577:G:GT	-21342	-21342	18	23	0.239583	0.000817443	-0.468708	0.127958	0.0442956	0.0461931	0.24009	9.76585e-05	0.335228	FALSE
ENSG00000117500.13	130	1.01359	40.2682	32.6326	0.0195629	1:93157232:A:G	-23284	-23284	18	22	0.770833	0.0155604	0.262754	0.103317	0.544146	0.542357	0.591694	9.9784e-05	0.826158	FALSE
ENSG00000117505.13	189	1.02047	35.8042	30.9325	0.000840093	1:93339644:T:G	-6263	-6263	31	46	0.479167	0.000377643	-0.305043	0.0775388	0.0250975	0.0273543	0.185105	0.000116814	0.258454	FALSE
ENSG00000223745.8	189	1.04634	35.0541	30.4122	0.000449564	1:93330375:T:C	-15650	-15650	20	23	0.760417	0.00016427	0.677183	0.160456	0.0120988	0.0126503	0.125467	0.000138118	0.175184	FALSE
ENSG00000137942.18	21	0.986457	6.00193	33.7968	0.0523193	1:93479233:C:T	31115	31115	3	6	0.0625	0.0482414	0.621989	0.303879	0.283972	0.281591	0.477344	0.000568964	0.666495	FALSE
ENSG00000224093.7	43	1.00135	14.5726	33.7009	0.109638	1:93544683:A:T	-47283	-47283	5	9	0.09375	0.102929	0.473047	0.282485	0.812819	0.815536	0.672306	0.000256379	0.938712	FALSE
ENSG00000260464.1	48	1.00908	25.1802	33.3852	0.100443	1:93874288:A:C	27114	27114	20	30	0.3125	0.0924628	0.32075	0.185418	0.928807	0.92929	0.700101	0.000155374	0.977522	FALSE
ENSG00000067334.14	74	1.02373	30.0932	33.276	2.89868e-05	1:93878405:G:A	-1513	-1513	4	7	0.0729167	1.78877e-05	0.89744	0.180792	0.00079992	0.000730528	0.0202823	0.000141614	0.0283193	TRUE
ENSG00000023909.10	70	1.02664	24.8599	33.1816	0.0392501	1:93878405:G:A	-31051	-31051	4	7	0.0729167	0.0341659	-0.409362	0.185705	0.626937	0.619118	0.616728	0.000174294	0.861111	FALSE
ENSG00000117528.14	46	1.00294	15.124	33.5033	0.0110191	1:94423858:A:G	5469	5469	4	7	0.0729167	0.00934764	-0.612313	0.22259	0.150985	0.153286	0.387768	0.000249391	0.541424	FALSE
ENSG00000117519.16	63	1.00271	5.24906	31.8013	0.131344	1:94899861:A:G	-27362	-27362	9	17	0.822917	0.11319	0.250627	0.154257	0.523648	0.521255	0.584461	0.000717297	0.816058	FALSE
ENSG00000172339.10	17	1.00329	6.16058	35.3719	0.0088833	1:95092681:C:T	19730	19730	6	10	0.104167	0.00925389	-0.577426	0.209601	0.0516948	0.0529169	0.254613	0.000613321	0.355505	FALSE
ENSG00000228502.1	77	0.924455	2.68049	38.7889	0.308201	1:96451710:G:A	4780	4780	6	10	0.895833	0.333402	0.263353	0.268497	0.632837	0.655917	0.626829	0.000857451	0.875214	FALSE
ENSG00000137970.7	7	1.03727	6.71577	35.6463	0.0796473	1:96727589:A:G	47969	47969	3	6	0.0625	0.0824666	0.401239	0.224429	0.419458	0.410084	0.539355	0.000683729	0.753079	FALSE
ENSG00000117569.20	36	1.03013	23.0363	34.5735	0.00824377	1:96760365:T:C	38700	38700	10	13	0.135417	0.00785141	0.333254	0.118167	0.164284	0.162887	0.39561	0.000191862	0.552373	FALSE
ENSG00000188641.14	50	0.93417	5.07401	36.0559	0.0563492	1:98007323:C:T	12323	12323	15	19	0.802083	0.0601372	-0.163703	0.0842674	0.287771	0.28373	0.478676	0.000481209	0.668355	FALSE
ENSG00000156869.14	54	1.02788	15.3183	33.7183	0.054686	1:99803134:C:T	36499	36499	3	5	0.0520833	0.0502223	0.630091	0.310691	0.571143	0.56503	0.59978	0.000284758	0.837448	FALSE
ENSG00000162688.17	82	1.01954	16.6669	34.7892	0.00980021	1:99851033:A:G	672	672	16	24	0.25	0.00957748	-0.315132	0.114964	0.145085	0.144873	0.381883	0.0002495	0.533207	FALSE
ENSG00000228084.3	113	1.03148	17.2127	30.4804	0.248374	1:99923192:T:C	-46765	-46765	23	26	0.270833	0.215629	-0.2677	0.212282	0.991701	0.992139	0.714782	0.000258683	0.99802	FALSE
ENSG00000288826.1	140	1.01906	26.232	30.3738	0.0380679	1:100052768:C:CT	14726	14726	4	5	0.0520833	0.0258225	1.00677	0.432477	0.631337	0.630703	0.619989	0.000158123	0.865664	FALSE
ENSG00000156876.10	62	0.992263	20.6677	33.2547	0.000274318	1:100143437:G:A	10482	10482	4	7	0.0729167	0.000188444	0.86464	0.207174	0.00489951	0.00590328	0.0824632	0.000171118	0.11514	FALSE
ENSG00000122435.11	62	1.01781	20.2127	32.1563	0.070724	1:100146015:C:T	12865	12865	21	30	0.6875	0.0592081	0.216169	0.110849	0.766523	0.767329	0.65941	0.000203702	0.920706	FALSE
ENSG00000122477.13	65	1.02429	27.9138	33.536	0.0322571	1:100224554:G:A	46281	46281	5	9	0.09375	0.0286608	-0.606488	0.265734	0.591641	0.588864	0.606897	0.000153158	0.847385	FALSE
ENSG00000137992.15	106	1.02475	40.5202	33.911	0.0102897	1:100205706:T:C	-44128	-44128	3	6	0.0625	0.00912323	-0.621894	0.225278	0.332867	0.330736	0.506226	0.000105804	0.706822	FALSE
ENSG00000224616.5	97	1.01867	33.9925	33.4813	0.0237541	1:100270347:A:G	4165	4165	3	6	0.0625	0.0207483	0.724946	0.299305	0.553445	0.549744	0.594626	0.00012176	0.830251	FALSE
ENSG00000137996.13	97	0.981576	36.2206	35.0342	0.015147	1:100266264:G:A	48	48	16	22	0.770833	0.0151974	-0.393165	0.154003	0.432957	0.433716	0.548744	9.14061e-05	0.766188	FALSE
ENSG00000079335.20	75	1.0187	27.1416	32.1731	0.0468591	1:100393964:T:A	48963	48963	4	7	0.0729167	0.0380477	0.190986	0.088588	0.722228	0.721482	0.64697	0.000152507	0.903337	FALSE
ENSG00000234332.1	115	1.04026	41.0376	32.4324	0.00384387	1:100418173:G:C	24147	24147	5	7	0.0729167	0.00265929	-0.880456	0.272189	0.133587	0.133218	0.371119	0.000114071	0.518177	FALSE
ENSG00000162694.14	38	1.01321	17.5768	33.4272	0.0143747	1:100909043:A:ATG	13864	13864	6	7	0.0729167	0.0122274	-0.701449	0.265458	0.219778	0.219313	0.441516	0.000228032	0.61647	FALSE
ENSG00000162695.12	38	1.0066	17.6306	33.7945	0.0716724	1:100926762:A:AGGCAGTGAA	30686	30686	3	5	0.0520833	0.0667283	-0.341821	0.180625	0.730027	0.728182	0.649243	0.000218651	0.90651	FALSE
ENSG00000233184.9	66	0.9965	17.8487	32.1096	0.13731	1:101075443:T:C	49599	49599	14	18	0.1875	0.120588	-0.202232	0.127105	0.928907	0.928812	0.699992	0.000203308	0.977369	FALSE
ENSG00000117543.22	66	0.996027	18.3081	32.3898	0.044409	1:101045263:G:A	19175	19175	3	6	0.0625	0.0365433	0.358143	0.164729	0.561644	0.566476	0.600073	0.00019764	0.837856	FALSE
ENSG00000225938.3	124	1.0109	37.5115	32.1863	0.0214979	1:101243196:T:C	6572	6572	13	17	0.177083	0.0164404	0.390805	0.155066	0.554845	0.552424	0.595904	0.000105434	0.832035	FALSE
ENSG00000170989.10	125	1.03536	37.864	31.8405	0.0541581	1:101243291:T:A	6426	6426	16	24	0.25	0.0433563	0.109924	0.0524379	0.870913	0.871411	0.68758	0.000120273	0.960039	FALSE
ENSG00000228399.1	177	1.0342	43.6001	32.0021	0.03933	1:101295388:GC:G	39114	39114	8	10	0.104167	0.0310443	0.60001	0.267021	0.817418	0.817031	0.672717	0.000103775	0.939286	FALSE
ENSG00000185946.16	37	0.981155	11.8238	34.4211	0.142681	1:103533840:C:T	8149	8149	26	34	0.645833	0.139319	-0.199985	0.132198	0.840516	0.842534	0.679775	0.000279397	0.949141	FALSE
ENSG00000240038.7	34	0.985284	13.216	34.5517	0.00203762	1:103555063:C:T	1248	1248	21	25	0.260417	0.0019033	-0.679419	0.202314	0.0272973	0.0282099	0.187953	0.000256418	0.262431	FALSE
ENSG00000198890.9	22	0.988109	4.16828	34.6539	0.0119727	1:107057296:C:T	622	622	10	12	0.125	0.0115487	-0.538644	0.202069	0.0527947	0.0509343	0.250783	0.00082778	0.350158	FALSE
ENSG00000230489.1	136	1.0265	41.8657	32.9505	0.0227439	1:107986088:G:A	21645	21645	3	6	0.0625	0.018849	0.542607	0.220318	0.609939	0.606816	0.612699	0.000103439	0.855485	FALSE
ENSG00000134215.16	135	1.02674	40.0375	32.5181	0.00196503	1:107967535:C:A	2355	2355	5	7	0.0729167	0.00131296	-0.578348	0.165559	0.069993	0.0699301	0.285394	0.000108309	0.398484	FALSE
ENSG00000226822.4	130	1.0106	58.0841	35.47	0.00172138	1:107994279:A:C	-45984	-45984	22	35	0.364583	0.00184949	-0.569315	0.169	0.0921908	0.0924971	0.319318	6.79748e-05	0.44585	FALSE
ENSG00000085491.17	111	1.04628	45.199	32.8861	0.0917013	1:108182516:GCA:G	-18333	-18333	3	6	0.0625	0.0817463	-0.367986	0.205324	0.984602	0.985701	0.713858	0.000107099	0.996729	FALSE
ENSG00000162636.16	47	1.00181	3.77982	35.8555	0.0991982	1:108534788:T:C	-25301	-25301	3	6	0.0625	0.103379	-0.292425	0.174862	0.330767	0.32544	0.504131	0.000990629	0.703897	FALSE
ENSG00000162639.16	51	1.02137	23.9462	34.0077	0.0558838	1:108620337:AATTATATAC:A	-41189	-41189	8	13	0.135417	0.0523754	0.402439	0.200386	0.742126	0.740404	0.652464	0.000175541	0.911008	FALSE
ENSG00000285923.1	51	1.00185	23.5467	34.2085	0.0297428	1:108697441:A:G	35908	35908	6	8	0.0833333	0.0278879	0.706401	0.307893	0.508849	0.507956	0.578399	0.000159155	0.807594	FALSE
ENSG00000290126.1	83	1.04787	21.301	32.1065	0.141373	1:108643354:TA:T	-48835	-48835	10	11	0.114583	0.12441	-0.541805	0.344151	0.955404	0.957416	0.706749	0.000229111	0.986803	FALSE
ENSG00000134186.12	83	1.01965	22.4729	33.2351	0.0254723	1:108740020:C:T	47710	47710	27	39	0.40625	0.0218148	0.265442	0.110569	0.435356	0.430567	0.548182	0.000185192	0.765403	FALSE
ENSG00000116266.11	157	1.00055	47.9265	33.1013	0.0150799	1:108733649:CT:C	-13025	-13025	3	5	0.0520833	0.0124125	-0.292961	0.111127	0.519348	0.516976	0.582145	7.75904e-05	0.812824	FALSE
ENSG00000121957.15	74	0.98727	15.1009	32.1348	0.0081915	1:108924236:G:A	48886	48886	14	18	0.1875	0.00575974	0.634577	0.215737	0.123688	0.12059	0.356781	0.000227162	0.498159	FALSE
ENSG00000244716.3	87	1.02942	28.2565	32.2997	0.0165357	1:108954010:C:CA	-38272	-38272	13	21	0.21875	0.0125419	0.386998	0.147034	0.368963	0.361728	0.519128	0.000155808	0.724837	FALSE
ENSG00000228665.2	99	1.02749	23.7002	31.7233	0.0448979	1:109063327:AAAT:A	33260	33260	5	5	0.0520833	0.0350152	-0.825967	0.376577	0.660334	0.652227	0.625594	0.000183708	0.87349	FALSE
ENSG00000085433.17	115	1.01327	30.2062	32.2684	0.0365392	1:109038240:C:T	-3873	-3873	3	5	0.0520833	0.0293408	-0.445057	0.195889	0.674533	0.669857	0.630754	0.000132764	0.880695	FALSE
ENSG00000197780.11	146	1.01986	36.9833	31.619	0.0102149	1:109122356:TA:T	46344	46344	7	10	0.104167	0.00684421	-0.502698	0.174899	0.315668	0.306786	0.493369	0.000112692	0.68887	FALSE
ENSG00000215717.7	166	1.0482	46.2901	31.6626	0.00616419	1:109103686:T:G	12922	12922	4	5	0.0520833	0.00395442	-0.484649	0.157065	0.231577	0.228766	0.447065	0.00010569	0.624218	FALSE
ENSG00000273382.1	166	1.05565	47.1864	31.7597	0.0220459	1:109123781:C:T	32923	32923	3	6	0.0625	0.0161608	-0.783011	0.309808	0.634937	0.627574	0.618482	0.000108	0.86356	FALSE
ENSG00000116299.17	196	1.04125	53.9209	31.941	0.0160266	1:109125385:TTTTTG:T	11706	11706	9	14	0.145833	0.011646	0.516505	0.194012	0.567643	0.562901	0.599668	8.73089e-05	0.837291	FALSE
ENSG00000179902.13	195	1.02925	57.1292	32.8946	0.0238998	1:109098152:T:C	-15705	-15705	10	12	0.125	0.0197561	0.601314	0.246144	0.741626	0.738856	0.652179	7.70119e-05	0.910609	FALSE
ENSG00000031698.13	208	1.04921	71.8809	31.9576	0.00288807	1:109197926:G:T	-15992	-15992	10	14	0.145833	0.00180807	-0.390125	0.115523	0.170883	0.169663	0.400703	6.84564e-05	0.559485	FALSE
ENSG00000143126.8	175	1.03818	66.8273	32.0628	0.00397651	1:109211961:T:C	-37578	-37578	4	6	0.0625	0.00260414	0.69586	0.214605	0.224578	0.218092	0.440808	6.9252e-05	0.615482	FALSE
ENSG00000134222.16	133	1.03914	47.301	32.4831	0.00056462	1:109275536:C:CT	-7650	-7650	16	18	0.8125	0.000342189	-0.609913	0.153698	0.020298	0.0224934	0.168751	9.8355e-05	0.23562	FALSE
ENSG00000134243.12	141	1.01521	21.4387	31.9495	0.0983729	1:109367391:C:T	-30527	-30527	3	5	0.0520833	0.0834395	0.260532	0.146208	0.885211	0.888646	0.690651	0.000189172	0.964327	FALSE
ENSG00000143106.13	93	1.0004	20.3907	33.5571	0.0926991	1:109407985:A:G	-18463	-18463	23	38	0.604167	0.0858662	-0.153787	0.087009	0.857614	0.862345	0.685664	0.000182194	0.957363	FALSE
ENSG00000162650.17	91	1.01332	27.743	32.2724	0.046985	1:109498856:TAA:T	15376	15376	18	23	0.239583	0.0384605	0.342062	0.159024	0.734227	0.732207	0.650435	0.00014459	0.908175	FALSE
ENSG00000174151.15	95	0.992873	29.3832	32.3093	0.0543023	1:109498415:CAG:C	4363	4363	26	37	0.385417	0.0450564	0.394532	0.189813	0.805619	0.808143	0.670497	0.000120807	0.936186	FALSE
ENSG00000181754.7	103	1.00774	31.2786	31.992	0.00153434	1:109509517:A:G	-221	-221	27	44	0.458333	0.000913594	0.301255	0.0831413	0.0459954	0.0456549	0.239217	0.000124099	0.334008	FALSE
ENSG00000290117.1	114	1.04696	34.5421	31.1727	0.00956095	1:109526562:C:G	-21902	-21902	3	6	0.0625	0.00599323	-0.911678	0.311576	0.263874	0.261829	0.466135	0.000140644	0.650844	FALSE
ENSG00000065135.12	114	1.03263	35.5778	31.5705	0.01453	1:109526562:C:G	-22053	-22053	3	6	0.0625	0.0100191	-0.383263	0.140748	0.394561	0.390254	0.531831	0.000126038	0.742573	FALSE
ENSG00000116337.20	159	1.0395	40.0658	30.6252	0.000541105	1:109597477:A:T	-18627	-18627	12	16	0.166667	0.000213876	-0.63678	0.154177	0.0150985	0.0181306	0.14918	0.000116341	0.208294	FALSE
ENSG00000168765.19	162	1.04482	41.372	30.5936	1.78909e-06	1:109629740:C:T	-26359	-26359	25	33	0.34375	3.16768e-07	-0.847494	0.134643	9.999e-05	4.74182e-05	0.00283829	0.000116058	0.00396299	TRUE
ENSG00000213366.13	186	1.03053	40.8992	30.7741	0.000257317	1:109669213:T:C	1191	1191	26	33	0.34375	9.563e-05	-0.626914	0.142355	0.00709929	0.00899427	0.104093	0.000108347	0.14534	FALSE
ENSG00000134201.12	165	1.0624	38.3485	30.5243	0.00670459	1:109737079:C:T	25299	25299	25	37	0.385417	0.00365941	-0.52637	0.168978	0.19748	0.202611	0.430419	0.000137806	0.600976	FALSE
ENSG00000134202.12	110	1.05683	22.8125	29.8771	0.0040583	1:109731286:G:T	-9752	-9752	28	41	0.572917	0.00184611	0.501012	0.148694	0.0720928	0.0754795	0.294683	0.000224672	0.411453	FALSE
ENSG00000261055.1	104	1.03216	32.1338	32.6437	0.0218954	1:109938157:C:G	42184	42184	28	39	0.40625	0.0175646	0.473554	0.189987	0.49835	0.493833	0.573842	0.000139167	0.801231	FALSE
ENSG00000184371.14	104	1.02523	31.7593	32.4785	0.0162832	1:109945723:G:T	35481	35481	6	7	0.0729167	0.0125821	-0.886842	0.337109	0.393861	0.394175	0.53323	0.00013535	0.744526	FALSE
ENSG00000168710.18	62	1.01996	15.9922	32.6035	0.00463877	1:109935705:G:A	-49060	-49060	8	10	0.104167	0.00333748	-0.786508	0.249705	0.0662934	0.0674738	0.281804	0.000260651	0.39347	FALSE
ENSG00000143093.15	59	1.02208	17.3444	31.611	0.049213	1:110059175:C:G	27598	27598	20	29	0.302083	0.0383539	0.301873	0.140259	0.577742	0.573431	0.602952	0.000243303	0.841876	FALSE
ENSG00000116396.15	67	1.02182	26.9652	32.8042	0.000383828	1:110211430:A:T	1116	1116	4	6	0.0625	0.000242951	0.974353	0.238436	0.00759924	0.00923713	0.106021	0.000156303	0.148032	FALSE
ENSG00000162775.17	96	1.02293	33.5146	31.8877	0.00423176	1:110380192:G:A	41686	41686	21	33	0.34375	0.0027111	-0.490934	0.152108	0.127787	0.125389	0.362258	0.000126578	0.505805	FALSE
ENSG00000227963.2	96	0.996563	34.056	32.7277	0.0184466	1:110371663:G:C	32492	32492	28	35	0.364583	0.0147624	-0.546653	0.213119	0.475152	0.471244	0.56528	0.000106594	0.789277	FALSE
ENSG00000224699.11	105	1.01426	36.3394	31.9322	0.00847221	1:110343664:C:T	-3452	-3452	6	8	0.0833333	0.00581446	-0.544747	0.185428	0.262774	0.25971	0.465181	0.000111005	0.649513	FALSE
ENSG00000168679.18	129	1.03566	39.5281	31.7343	0.011716	1:110347896:G:T	-43186	-43186	3	6	0.0625	0.00807271	1.08105	0.384827	0.362264	0.355464	0.516159	0.000115407	0.720691	FALSE
ENSG00000134248.14	105	1.00378	29.8984	31.4756	0.000221174	1:110424568:C:CA	16626	16626	4	5	0.0520833	9.70658e-05	1.01748	0.231305	0.00489951	0.00645796	0.0867293	0.000126803	0.121096	FALSE
ENSG00000177301.16	92	1.01839	31.2447	31.814	0.0493199	1:110670626:C:A	39152	39152	31	47	0.489583	0.0390785	-0.34056	0.158861	0.787421	0.788606	0.665686	0.000132249	0.92947	FALSE
ENSG00000177272.10	95	1.01723	31.4802	32.1592	0.000471902	1:110631264:G:A	-43676	-43676	7	11	0.114583	0.000262654	0.42245	0.104062	0.0130987	0.0136194	0.129971	0.000130377	0.181473	FALSE
ENSG00000288803.1	92	1.02911	31.1732	32.2948	0.0437063	1:110660146:C:T	-20362	-20362	8	9	0.09375	0.0356486	0.580648	0.265706	0.739826	0.741841	0.653002	0.000140988	0.911758	FALSE
ENSG00000143119.14	258	1.0054	41.6173	31.9028	0.0229822	1:110920610:T:A	49422	49422	3	6	0.0625	0.0171642	-0.274353	0.109643	0.622438	0.617669	0.616275	9.1985e-05	0.860479	FALSE
ENSG00000232811.1	122	1.01624	32.1957	31.7642	0.000274825	1:110907786:G:A	-35681	-35681	22	30	0.3125	0.000132683	-0.683532	0.15922	0.0069993	0.00810464	0.0976809	0.000126746	0.136388	FALSE
ENSG00000121931.16	57	1.01286	21.2828	33.8945	0.0898874	1:110950237:T:C	-13728	-13728	5	5	0.0520833	0.0847393	-0.578791	0.326236	0.863114	0.86252	0.685664	0.000187954	0.957363	FALSE
ENSG00000134255.16	189	1.03518	34.7862	29.878	0.00616752	1:111124536:T:C	-14943	-14943	9	13	0.135417	0.00299978	-0.534407	0.167538	0.181382	0.180406	0.41137	0.000130775	0.574379	FALSE
ENSG00000156171.15	193	1.00779	35.8486	30.1761	0.0155287	1:111185988:T:C	45785	45785	13	15	0.15625	0.00908124	0.46961	0.170001	0.429757	0.425606	0.546278	0.000108313	0.762744	FALSE
ENSG00000272982.1	189	1.03758	44.9236	30.2395	0.046828	1:111190658:A:G	9167	9167	4	5	0.0520833	0.0322754	-0.773301	0.346806	0.874913	0.876701	0.688314	0.000102655	0.961063	FALSE
ENSG00000273221.1	188	1.05696	46.0183	30.2693	0.00753738	1:111178153:G:T	-6908	-6908	14	19	0.197917	0.00402118	-0.56536	0.1836	0.270773	0.26883	0.469118	0.00011153	0.65501	FALSE
ENSG00000064886.14	190	1.04453	50.3867	30.7183	3.06803e-05	1:111198566:C:T	-2205	-2205	7	8	0.0833333	8.44433e-06	1.16636	0.223779	0.0009999	0.00113614	0.0281089	9.5151e-05	0.0392473	TRUE
ENSG00000162777.17	184	1.02745	52.5233	31.2881	0.000236989	1:111197723:C:G	-6812	-6812	25	32	0.666667	9.9818e-05	0.515176	0.117368	0.00869913	0.0108414	0.114735	8.2906e-05	0.160199	FALSE
ENSG00000085465.13	235	1.01722	39.6809	31.1016	0.00209014	1:111449894:C:T	22159	22159	7	8	0.0833333	0.00108648	-0.622533	0.174798	0.0735926	0.0757585	0.294711	0.000103433	0.411493	FALSE
ENSG00000260948.1	240	1.01045	42.8278	31.3563	0.016748	1:111461969:A:T	28901	28901	6	8	0.0833333	0.0114248	0.544394	0.203891	0.518148	0.509908	0.579233	9.21034e-05	0.808759	FALSE
ENSG00000243960.1	244	1.01763	47.2059	30.9014	0.0214241	1:111414748:G:C	-26616	-26616	5	5	0.0520833	0.014265	-1.41957	0.550398	0.633337	0.632793	0.620124	8.7157e-05	0.865853	FALSE
ENSG00000116459.11	232	0.999888	53.61	32.1587	0.0187176	1:111415066:T:C	-33798	-33798	9	10	0.104167	0.014116	-0.542467	0.209973	0.639936	0.636905	0.621095	6.9089e-05	0.867209	FALSE
ENSG00000116455.14	234	1.02426	50.8612	31.1532	0.0337489	1:111489504:T:C	40248	40248	5	6	0.0625	0.0243044	-0.576393	0.244837	0.823118	0.819092	0.67328	8.40612e-05	0.940073	FALSE
ENSG00000143110.12	183	1.0093	52.2162	32.3449	0.0162372	1:111462887:G:T	-10905	-10905	4	8	0.0833333	0.0123603	-0.298385	0.11311	0.576242	0.570388	0.602225	7.50337e-05	0.840861	FALSE
ENSG00000116473.15	42	1.02015	15.3711	32.9616	0.0932688	1:111578681:G:A	36463	36463	3	6	0.0625	0.0835806	-0.345694	0.194092	0.772023	0.771761	0.660385	0.000271473	0.922068	FALSE
ENSG00000121933.19	49	1.01712	20.5266	32.4358	0.0433114	1:111608117:G:C	44155	44155	4	5	0.0520833	0.0357094	0.839234	0.384171	0.59524	0.589474	0.607067	0.000199786	0.847621	FALSE
ENSG00000231346.5	204	1.00851	58.586	31.5588	0.00125769	1:111646435:C:A	37712	37712	18	23	0.760417	0.000675498	-0.65784	0.17634	0.0691931	0.0692606	0.284573	6.65643e-05	0.397337	FALSE
ENSG00000227811.3	225	1.05474	51.3262	29.8563	0.00310251	1:111749022:C:T	9443	9443	8	9	0.09375	0.00134656	-1.04346	0.299484	0.129087	0.129939	0.366701	9.88034e-05	0.512009	FALSE
ENSG00000064703.13	181	1.03515	40.7922	30.3332	0.00436942	1:111756207:T:C	1375	1375	19	25	0.260417	0.00217756	0.374227	0.113102	0.153485	0.151468	0.386335	0.000111511	0.539423	FALSE
ENSG00000197852.12	179	1.01845	38.9557	30.0545	0.000391484	1:111708703:A:G	-47121	-47121	6	9	0.09375	0.000127769	0.675732	0.156934	0.0108989	0.0139057	0.131423	0.000106116	0.183501	FALSE
ENSG00000231437.3	16	1.01063	9.31076	34.5358	0.0524109	1:111998714:G:A	8944	8944	3	6	0.0625	0.0508291	-0.665019	0.328826	0.392361	0.389207	0.531612	0.000423854	0.742268	FALSE
ENSG00000143079.15	21	1.00569	6.28729	35.0186	0.449874	1:112417031:G:T	20817	20817	3	6	0.0625	0.449996	-0.195804	0.256293	0.976102	0.976409	0.711432	0.000609542	0.993343	FALSE
ENSG00000273483.1	59	1.02071	16.737	32.4112	0.0403402	1:112473139:G:GAAAAAGGAA	-45302	-45302	3	5	0.0520833	0.0330266	0.771535	0.347613	0.491651	0.488235	0.572164	0.000250142	0.798888	FALSE
ENSG00000116489.13	107	1.0045	43.1833	33.3587	0.0251299	1:112662641:G:T	42836	42836	8	9	0.09375	0.0217545	-0.283608	0.118078	0.665433	0.66499	0.629073	8.81749e-05	0.878347	FALSE
ENSG00000007341.19	108	1.00859	40.6103	32.4527	0.00670069	1:112639117:C:G	18292	18292	3	5	0.0520833	0.00484269	0.856698	0.284776	0.235876	0.235302	0.452041	9.60693e-05	0.631166	FALSE
ENSG00000155363.19	156	1.00231	40.1738	31.0816	0.0118864	1:112664621:C:A	-8520	-8520	5	7	0.0729167	0.00754642	0.361077	0.127327	0.384262	0.380339	0.528212	9.35462e-05	0.73752	FALSE
ENSG00000155366.17	110	1.00708	31.754	31.6565	0.000143	1:112705091:G:A	-2343	-2343	13	14	0.145833	6.29135e-05	-0.602239	0.132511	0.00329967	0.00434833	0.0692581	0.000121763	0.0967021	TRUE
ENSG00000155367.16	92	1.0211	27.3256	31.2087	0.0309369	1:112704008:G:A	-11324	-11324	6	6	0.0625	0.0221867	1.03365	0.431868	0.571443	0.566762	0.600319	0.000153602	0.8382	FALSE
ENSG00000226419.8	55	0.988516	13.336	32.5441	0.00448237	1:112923261:G:GTGAGCCGAG	-33154	-33154	29	39	0.59375	0.00318909	-0.604609	0.190919	0.060194	0.0603381	0.270421	0.000259209	0.377578	FALSE
ENSG00000155380.13	54	0.994405	13.277	32.2869	0.164972	1:112932793:C:CA	-24800	-24800	33	47	0.510417	0.148018	-0.276335	0.186807	0.906509	0.909564	0.695634	0.000269873	0.971285	FALSE
ENSG00000198799.12	66	1.01543	22.8556	34.5389	0.00842364	1:113115529:AT:A	42331	42331	18	23	0.760417	0.00799277	-0.281313	0.0999998	0.172183	0.170196	0.401451	0.000177678	0.560529	FALSE
ENSG00000116793.16	107	1.02793	38.167	32.6929	0.0258721	1:113713517:C:T	-45972	-45972	18	25	0.260417	0.0210799	-0.241328	0.0999149	0.626537	0.620383	0.617297	0.000114391	0.861905	FALSE
ENSG00000081019.14	137	1.02287	47.3956	32.2167	0.029485	1:113841809:G:A	29333	29333	4	7	0.0729167	0.0231827	0.448692	0.188956	0.749225	0.750258	0.655727	8.94862e-05	0.915564	FALSE
ENSG00000134242.16	146	1.01523	56.7014	32.496	0.00223609	1:113860224:G:C	-11529	-11529	14	20	0.208333	0.00150232	0.413135	0.11994	0.113489	0.114727	0.350445	7.15538e-05	0.489311	FALSE
ENSG00000188761.13	135	1.00536	52.4077	32.7707	0.00593275	1:113856811:C:T	-30770	-30770	4	6	0.0625	0.00444285	1.00532	0.330556	0.269173	0.265532	0.467304	7.30301e-05	0.652477	FALSE
ENSG00000118655.8	114	1.02622	46.8397	33.0066	0.0235093	1:113894348:T:C	-10271	-10271	20	27	0.28125	0.019625	-0.360933	0.147575	0.663534	0.661298	0.628246	9.23099e-05	0.877193	FALSE
ENSG00000134262.13	112	1.03807	46.2259	32.8704	0.0466711	1:113949601:CT:C	44399	44399	7	11	0.114583	0.0400103	-0.448557	0.21029	0.882812	0.883107	0.689266	0.000100039	0.962393	FALSE
ENSG00000163349.22	104	1.01861	38.1888	32.457	0.0093506	1:113926881:A:G	-2443	-2443	7	11	0.114583	0.00692683	0.270726	0.0943456	0.29697	0.292984	0.484307	0.000108347	0.676218	FALSE
ENSG00000235527.7	104	1.03445	36.4391	31.8542	0.0782495	1:113956070:AT:A	26572	26572	5	7	0.0729167	0.0647282	-0.685315	0.35933	0.943206	0.945246	0.703329	0.000124333	0.982028	FALSE
ENSG00000197323.12	59	1.01487	26.8532	33.0374	0.0567065	1:114505523:CAT:C	-5680	-5680	8	11	0.114583	0.0497422	-0.48528	0.238757	0.789521	0.787009	0.665657	0.000150742	0.929429	FALSE
ENSG00000116752.6	70	0.986024	12.3995	31.8899	0.0761553	1:114627582:CAAAAAAAAA:C	45953	45953	6	9	0.09375	0.0629997	-0.483036	0.251543	0.626037	0.631395	0.620124	0.000274559	0.865853	FALSE
ENSG00000175984.15	47	0.990746	11.6023	31.9894	0.0309834	1:114693958:A:T	23536	23536	20	23	0.239583	0.0239448	0.480947	0.203736	0.314369	0.310154	0.495416	0.000302041	0.691728	FALSE
ENSG00000213281.5	78	0.988241	21.8138	31.6899	0.0104725	1:114765879:G:C	49108	49108	12	16	0.166667	0.0070989	0.47616	0.166496	0.210379	0.209894	0.435405	0.000158183	0.607938	FALSE
ENSG00000009307.17	82	1.00839	25.908	32.0392	0.0167089	1:114716978:G:T	-41698	-41698	8	9	0.09375	0.0123212	0.74234	0.281265	0.352865	0.349756	0.514131	0.000150396	0.717859	FALSE
ENSG00000052723.12	57	0.986169	17.6842	31.8421	0.0294545	1:114765879:G:C	-14806	-14806	12	16	0.166667	0.0223504	0.352159	0.147329	0.417358	0.417338	0.542508	0.000192659	0.757481	FALSE
ENSG00000134198.10	175	1.01719	53.789	32.1212	0.0482899	1:115071837:T:C	-17666	-17666	5	7	0.0729167	0.0391403	0.569158	0.265584	0.927507	0.928009	0.699799	7.62962e-05	0.9771	FALSE
ENSG00000233730.2	152	1.04046	51.8406	32.0866	0.0339821	1:115071837:T:C	-27743	-27743	5	7	0.0729167	0.0267004	0.674923	0.291752	0.822718	0.822956	0.674133	9.04112e-05	0.941263	FALSE
ENSG00000173218.15	44	1.01128	10.7142	33.6227	0.0145163	1:115691679:C:T	49709	49709	5	7	0.0729167	0.0126133	0.750138	0.285254	0.141786	0.141336	0.378893	0.000369777	0.529032	FALSE
ENSG00000163393.13	120	1.01097	31.4326	31.8802	0.00133001	1:116004038:C:T	27525	27525	5	7	0.0729167	0.000765213	0.705994	0.191513	0.0384962	0.0393865	0.222477	0.000125871	0.310636	FALSE
ENSG00000173212.5	82	1.00734	16.4836	30.8048	0.00322431	1:116120428:C:G	9029	9029	5	7	0.0729167	0.00167425	0.94513	0.277562	0.0488951	0.0505858	0.250369	0.000234889	0.34958	FALSE
ENSG00000163399.16	106	1.01133	14.609	29.5007	0.0531654	1:116414982:G:A	42314	42314	3	5	0.0520833	0.0349556	-0.434661	0.198102	0.547345	0.544641	0.592727	0.000271323	0.8276	FALSE
ENSG00000203865.13	77	1.04302	14.7689	30.233	0.00384072	1:116382708:C:CTG	-38593	-38593	19	23	0.760417	0.00184598	-0.650881	0.193172	0.0456954	0.0479682	0.245088	0.00032155	0.342205	FALSE
ENSG00000233154.6	129	1.03251	50.6527	32.1383	0.0288386	1:116498849:A:G	20007	20007	6	6	0.0625	0.0224685	-0.620048	0.259648	0.762024	0.762414	0.658409	8.84808e-05	0.919309	FALSE
ENSG00000224950.2	144	1.03709	57.2119	32.1582	0.0222064	1:116451936:C:A	-47276	-47276	4	5	0.0520833	0.0169769	0.529433	0.211196	0.711629	0.709721	0.642354	8.03928e-05	0.896891	FALSE
ENSG00000116815.16	38	1.01869	19.886	33.4184	0.0184775	1:116524285:A:G	-46754	-46754	8	12	0.125	0.0158733	-0.430416	0.169797	0.30237	0.301345	0.489992	0.000208107	0.684155	FALSE
ENSG00000116824.5	79	1.02578	24.6841	31.8412	0.00266692	1:116759991:A:G	5561	5561	7	10	0.104167	0.00162503	-0.416669	0.121976	0.0562944	0.0588217	0.267299	0.000174673	0.373218	FALSE
ENSG00000225079.2	96	1.03481	26.8932	31.6557	0.04108	1:116796992:C:G	21369	21369	3	5	0.0520833	0.0315934	1.09376	0.488445	0.665533	0.662536	0.628621	0.000168777	0.877716	FALSE
ENSG00000134256.13	88	0.9967	28.8481	32.9977	0.00979622	1:117009938:T:C	8188	8188	5	6	0.0625	0.00778426	-0.953819	0.337804	0.248675	0.248652	0.459294	0.000125942	0.641292	FALSE
ENSG00000116830.12	116	1.01053	34.67	33.1708	0.105028	1:117033900:A:T	-26426	-26426	5	5	0.0520833	0.0957735	0.601302	0.351259	0.977202	0.978187	0.711948	0.000113824	0.994063	FALSE
ENSG00000198162.12	41	1.02835	19.8626	33.3005	0.0355512	1:117350047:C:T	-17402	-17402	3	5	0.0520833	0.0311014	0.370474	0.164931	0.49735	0.499451	0.575465	0.000220251	0.803497	FALSE
ENSG00000183508.5	35	1.03305	15.1924	32.5985	0.000582058	1:117615693:A:G	9645	9645	3	5	0.0520833	0.00036232	0.85479	0.216488	0.00619938	0.00743318	0.0938073	0.000295654	0.130979	FALSE
ENSG00000196505.11	99	1.00617	13.3289	30.7875	0.00217158	1:117904016:C:T	-25605	-25605	6	7	0.0729167	0.00106855	0.674128	0.188969	0.0271973	0.0278749	0.187065	0.000288455	0.261191	FALSE
ENSG00000065183.16	99	1.01542	13.8488	31.0128	0.0496984	1:117932109:A:G	2389	2389	11	17	0.177083	0.036907	-0.216511	0.0997902	0.50145	0.499138	0.575465	0.000293136	0.803497	FALSE
ENSG00000231365.7	126	1.03133	45.889	32.2202	6.54141e-08	1:119140767:G:A	376	376	27	31	0.322917	1.75265e-08	-0.728397	0.100284	9.999e-05	1.98903e-06	0.000257495	9.70104e-05	0.000359529	TRUE
ENSG00000116874.12	126	1.04672	42.0854	31.2931	0.0329014	1:119126267:GA:G	-14387	-14387	7	11	0.114583	0.0239466	-0.429813	0.182078	0.744426	0.73958	0.652295	0.000115298	0.910772	FALSE
ENSG00000260941.1	67	1.01845	21.3954	33.1958	0.000778933	1:119608326:T:C	9055	9055	4	7	0.0729167	0.000557312	1.13114	0.297808	0.0123988	0.0152156	0.136393	0.000193164	0.19044	FALSE
ENSG00000143067.5	55	1.01797	13.3291	32.8333	0.0851014	1:119648202:TTGGC:T	-64	-64	4	6	0.0625	0.0753121	0.472592	0.257817	0.692931	0.687629	0.636045	0.000309103	0.888082	FALSE
ENSG00000092621.13	55	1.01254	13.3556	32.6478	0.0982345	1:119621052:G:A	-27359	-27359	9	14	0.145833	0.0867352	0.3666	0.208013	0.741226	0.744485	0.654133	0.000298885	0.913339	FALSE
ENSG00000134193.15	141	0.935505	8.26675	32.9395	0.000866881	1:119853291:C:T	41711	41711	21	29	0.697917	0.000593464	-0.574142	0.152045	0.0106989	0.0100459	0.109975	0.000297366	0.153553	FALSE
ENSG00000134250.21	96	1.01557	23.1767	32.3039	0.0230886	1:120089485:ATT:A	-11294	-11294	5	7	0.0729167	0.0179687	-0.435825	0.175524	0.415258	0.410563	0.539355	0.00017536	0.753079	FALSE
ENSG00000265808.4	146	1.01069	27.3038	30.5178	0.0231043	1:120171845:C:T	-4675	-4675	16	20	0.208333	0.0148781	-0.33407	0.130406	0.468453	0.466634	0.563936	0.000144661	0.787399	FALSE
ENSG00000290569.1	100	1.0333	24.4238	31.627	0.00193886	1:120342045:A:T	174	174	12	13	0.864583	0.00110259	-0.789737	0.222075	0.0382962	0.0412377	0.228414	0.000184251	0.318925	FALSE
ENSG00000270231.5	134	1.0228	34.856	31.8028	7.62567e-06	1:120434003:G:A	18968	18968	24	35	0.364583	2.62466e-06	0.434263	0.0775885	0.00029997	0.000218199	0.00908239	0.000121618	0.0126814	TRUE
ENSG00000270392.2	147	0.982085	38.9699	32.5666	0.00832204	1:120417010:G:T	-17042	-17042	13	21	0.21875	0.00620103	-0.457319	0.157005	0.286971	0.286096	0.480423	8.52261e-05	0.670794	FALSE
ENSG00000226067.7	121	0.973334	35.3926	33.1523	0.000120217	1:120952058:C:T	38874	38874	36	46	0.520833	7.72074e-05	0.568411	0.12699	0.00459954	0.00496432	0.0735944	8.88238e-05	0.102757	FALSE
ENSG00000281741.2	124	0.980568	35.9101	33.1387	5.90108e-07	1:120954666:G:A	40428	40428	13	14	0.854167	2.82603e-07	-1.18902	0.187775	9.999e-05	2.6325e-05	0.00186678	9.16185e-05	0.00260651	TRUE
ENSG00000291135.1	71	1.03024	29.3099	32.5642	0.0481719	1:121123069:G:A	35771	35771	4	6	0.0625	0.0404138	-0.325238	0.152804	0.760324	0.754859	0.656778	0.000150914	0.917031	FALSE
ENSG00000171943.12	44	1.02128	7.67107	33.6513	0.0978351	1:121137240:C:G	-47571	-47571	3	5	0.0520833	0.0912638	-0.347481	0.200099	0.542746	0.536554	0.589348	0.000547087	0.822882	FALSE
ENSG00000188610.12	44	1.00021	7.41207	33.7093	0.0850516	1:121223320:A:T	37781	37781	5	7	0.0729167	0.0792192	0.612163	0.338601	0.482152	0.482451	0.570624	0.000500563	0.796739	FALSE
ENSG00000291141.1	30	0.976494	7.85421	33.3755	0.0118423	1:121539689:G:A	20586	20586	3	6	0.0625	0.00993126	0.950816	0.348722	0.0977902	0.0952877	0.324326	0.000408723	0.452842	FALSE
ENSG00000272583.2	30	0.988775	7.84919	32.7597	0.0995305	1:121564370:T:C	44769	44769	6	10	0.104167	0.0885029	-0.398877	0.227648	0.561444	0.565833	0.59978	0.000441188	0.837448	FALSE
ENSG00000223779.6	22	0.972315	9.01849	37.8026	0.00630968	1:143747089:C:T	1840	1840	3	6	0.0625	0.00862228	0.749451	0.26929	0.0619938	0.0606927	0.270492	0.000346682	0.377676	FALSE
ENSG00000265531.3	24	1.02523	10.7278	35.0155	0.143022	1:143884252:C:T	9459	9459	5	6	0.0625	0.143112	-0.275005	0.183588	0.80022	0.802166	0.669124	0.000400342	0.93427	FALSE
ENSG00000266338.7	80	0.985506	12.5854	32.4374	0.0491278	1:144461605:C:T	-71	-71	4	5	0.0520833	0.0408686	-0.549475	0.258777	0.479152	0.476461	0.567458	0.000269641	0.792318	FALSE
ENSG00000196369.12	4	0.989293	2.93873	34.9656	0.250217	1:145099939:AT:A	4411	4411	3	5	0.0520833	0.249981	-0.317547	0.271451	0.572943	0.575334	0.603415	0.00118292	0.842523	FALSE
ENSG00000215784.6	4	0.991733	3.03914	36.2226	0.096836	1:145064756:G:A	-31218	-31218	4	5	0.0520833	0.102735	-0.721121	0.430373	0.275472	0.269629	0.469703	0.00116062	0.655826	FALSE
ENSG00000281571.2	46	1.01553	16.5532	32.5236	0.024321	1:145206595:T:G	-8256	-8256	4	6	0.0625	0.0194164	-0.784295	0.320084	0.327967	0.327512	0.505393	0.00024543	0.705659	FALSE
ENSG00000290867.1	46	0.992528	16.9437	33.2664	0.0724352	1:145169353:A:G	-46705	-46705	25	38	0.395833	0.0652904	0.395481	0.207819	0.721428	0.722987	0.647729	0.000209069	0.904397	FALSE
ENSG00000236140.1	18	1.00341	8.8661	33.7246	0.0947735	1:145281779:CT:C	-5976	-5976	5	6	0.0625	0.0886631	0.664079	0.379202	0.589241	0.584893	0.606072	0.000426541	0.846232	FALSE
ENSG00000162825.18	40	0.959117	8.87485	32.8155	0.0133272	1:145463712:T:C	38109	38109	4	6	0.0625	0.0105534	-0.667233	0.246929	0.129787	0.124429	0.36057	0.000323822	0.503448	FALSE
ENSG00000291005.1	17	1.01788	11.0492	33.4491	0.124314	1:145593855:C:A	-14003	-14003	5	8	0.0833333	0.115798	0.445075	0.275986	0.766623	0.763743	0.65889	0.000372627	0.91998	FALSE
ENSG00000117262.19	17	1.00515	10.8801	33.4464	0.102028	1:145568447:G:C	-39541	-39541	3	6	0.0625	0.094289	-0.419306	0.243801	0.684332	0.687961	0.636051	0.000351221	0.888092	FALSE
ENSG00000117281.16	54	0.997512	23.8673	33.0224	0.013931	1:145763607:G:C	44136	44136	3	6	0.0625	0.01132	0.585655	0.219038	0.288271	0.285667	0.48025	0.000152973	0.670552	FALSE
ENSG00000186141.10	130	1.00911	32.6726	31.5765	0.0227065	1:145809105:G:A	-14948	-14948	4	6	0.0625	0.0163727	-0.567582	0.225055	0.520648	0.52355	0.585697	0.000119773	0.817784	FALSE
ENSG00000265491.5	130	1.03215	34.0593	31.7948	0.0278884	1:145870370:T:G	46275	46275	6	8	0.0833333	0.0209623	0.632945	0.261794	0.611839	0.604467	0.612128	0.000131296	0.854688	FALSE
ENSG00000186364.12	141	1.01	37.4747	32.1016	0.000808191	1:145842795:T:TGATAGATAG	-2837	-2837	4	5	0.0520833	0.000465043	1.17443	0.304133	0.0274973	0.0286979	0.188733	0.000104978	0.263519	FALSE
ENSG00000131788.16	133	1.04893	35.6376	31.3593	0.0273242	1:145837693:G:T	-22143	-22143	15	21	0.21875	0.0196299	0.382343	0.156336	0.612639	0.606486	0.612661	0.000137812	0.855432	FALSE
ENSG00000198483.13	135	1.02321	37.0939	31.7356	0.00448017	1:145892795:C:T	6929	6929	8	9	0.09375	0.00281768	-0.750636	0.233612	0.148085	0.145617	0.382	0.000114554	0.53337	FALSE
ENSG00000143127.13	131	1.03196	30.2974	31.0436	0.0111635	1:145945301:C:CA	35189	35189	14	17	0.822917	0.00700099	-0.526262	0.183665	0.276172	0.274102	0.472639	0.00014743	0.659926	FALSE
ENSG00000131779.11	119	1.00785	33.4713	32.2158	0.0315664	1:145891531:A:G	-27186	-27186	12	13	0.135417	0.0249486	0.379635	0.162039	0.659234	0.655004	0.626601	0.000116046	0.874896	FALSE
ENSG00000211451.13	119	1.02542	34.8854	32.5044	0.0517008	1:145952942:C:T	33929	33929	5	7	0.0729167	0.0433812	-0.629566	0.300365	0.836716	0.836833	0.678107	0.000123361	0.946812	FALSE
ENSG00000289565.1	108	1.02019	26.4657	30.8538	0.0428684	1:145907474:T:C	-19267	-19267	6	6	0.0625	0.0308649	1.07561	0.47813	0.680532	0.678512	0.633324	0.000157758	0.884283	FALSE
ENSG00000265241.8	108	1.0337	27.6389	31.2719	0.0235145	1:145883077:AT:A	-44602	-44602	25	38	0.395833	0.0164764	-0.329404	0.13075	0.476252	0.465878	0.56363	0.000163201	0.786973	FALSE
ENSG00000271601.4	97	1.00641	25.4986	31.7405	0.0415025	1:145934875:A:C	-23142	-23142	5	5	0.0520833	0.0321826	-0.513633	0.230219	0.659834	0.658082	0.627219	0.000151026	0.875759	FALSE
ENSG00000272031.3	85	1.00671	23.7463	31.4714	0.0615113	1:145950388:T:G	-14187	-14187	13	18	0.1875	0.0484497	-0.486425	0.237881	0.773223	0.776456	0.662372	0.000162458	0.924842	FALSE
ENSG00000121851.13	85	1.01208	24.4128	31.9502	0.0202138	1:145932077:G:T	-32613	-32613	10	15	0.15625	0.0150031	0.303531	0.118645	0.389761	0.386768	0.531083	0.000163116	0.741528	FALSE
ENSG00000265972.6	54	1.00287	14.8527	31.7577	0.0356077	1:145950388:T:G	-46191	-46191	13	18	0.1875	0.02727	0.403627	0.175176	0.421858	0.415009	0.541478	0.00025384	0.756043	FALSE
ENSG00000271425.9	9	0.980998	6.43966	35.8853	0.142681	1:146228354:G:A	-646	-646	4	5	0.0520833	0.147776	-0.516071	0.348659	0.634537	0.636656	0.621095	0.000512769	0.867209	FALSE
ENSG00000287978.1	63	1.00672	14.1165	32.4789	6.14179e-05	1:146388380:T:C	1178	1178	6	8	0.0833333	3.15301e-05	-1.0882	0.227861	0.00089991	0.00082438	0.0223856	0.000273256	0.0312561	TRUE
ENSG00000290578.1	55	0.997833	11.7708	32.6239	0.146232	1:146431002:A:G	29355	29355	8	10	0.104167	0.132137	0.499354	0.323896	0.838916	0.844977	0.680562	0.000310771	0.95024	FALSE
ENSG00000268043.9	156	1.03684	35.4283	31.5697	0.00712066	1:146964988:T:A	26664	26664	10	12	0.125	0.00457197	0.543796	0.179449	0.213379	0.208868	0.43512	0.000129612	0.60754	FALSE
ENSG00000227242.4	98	1.0115	17.8772	32.0461	0.0146174	1:147019444:C:T	-37149	-37149	14	23	0.239583	0.0106668	0.437512	0.162173	0.230577	0.226699	0.444933	0.000221964	0.621241	FALSE
ENSG00000131791.8	133	1.04777	42.5915	32.3575	0.0137478	1:147202378:G:C	29828	29828	4	5	0.0520833	0.0103508	-0.604478	0.22306	0.427657	0.422538	0.544852	0.000114591	0.760754	FALSE
ENSG00000237188.5	133	1.04239	41.4626	32.1171	0.00420951	1:147184847:A:G	12092	12092	7	7	0.0729167	0.00279361	-1.40463	0.436713	0.147085	0.146105	0.382098	0.000114252	0.533507	FALSE
ENSG00000131781.13	135	1.04463	54.8719	32.4578	0.02393	1:147233216:C:T	-9834	-9834	25	35	0.364583	0.0189601	0.387338	0.157432	0.722928	0.719383	0.646109	8.74254e-05	0.902134	FALSE
ENSG00000116128.12	13	0.956923	3.37887	37.0974	0.0453082	1:147559128:C:CT	17627	17627	4	6	0.9375	0.0519447	-0.365686	0.181734	0.164384	0.159279	0.392238	0.000841416	0.547665	FALSE
ENSG00000162836.12	92	0.991819	17.1797	32.0341	0.00440827	1:147652507:T:G	-18017	-18017	31	37	0.614583	0.00289961	0.546974	0.170798	0.0751925	0.0749012	0.294212	0.000205308	0.410796	FALSE
ENSG00000188092.15	5	0.98681	2.79972	36.0786	0.132536	1:147940565:T:A	12172	12172	5	9	0.09375	0.138551	-0.275479	0.181739	0.331167	0.3341	0.50801	0.00122336	0.709312	FALSE
ENSG00000274372.5	19	0.999063	12.5963	34.9979	0.0506945	1:147980274:C:A	-32929	-32929	4	8	0.0833333	0.0506876	0.543209	0.268423	0.479452	0.481166	0.569884	0.00029256	0.795705	FALSE
ENSG00000198658.4	116	1.00754	27.7015	31.5334	0.00120078	1:148147584:G:A	1189	1189	24	28	0.708333	0.000638578	0.738831	0.197004	0.0284972	0.0318059	0.199951	0.000139954	0.279183	FALSE
ENSG00000263956.8	107	1.00899	27.2582	31.8723	0.0248784	1:148103715:C:G	-48607	-48607	12	13	0.135417	0.0186524	-0.468261	0.18979	0.49815	0.492484	0.573427	0.000143456	0.800651	FALSE
ENSG00000291232.1	195	1.02257	52.8523	31.2359	0.0025682	1:148360851:G:A	-41665	-41665	6	10	0.104167	0.00140136	-0.983155	0.283351	0.120888	0.12024	0.35603	8.01108e-05	0.497109	FALSE
ENSG00000280649.2	119	0.995491	39.1488	32.1466	0.0176609	1:148424060:C:T	-34754	-34754	29	48	0.5	0.0132396	-0.345415	0.132349	0.50475	0.504374	0.576763	9.21268e-05	0.80531	FALSE
ENSG00000274020.4	38	1.00495	20.7767	33.5984	0.0431312	1:148530592:G:C	10988	10988	6	7	0.0729167	0.0389419	0.512057	0.238682	0.59604	0.597715	0.609895	0.00018374	0.85157	FALSE
ENSG00000270629.7	10	1.00676	8.00746	35.366	0.00263287	1:148636923:A:G	-42819	-42819	3	5	0.0520833	0.0027732	-0.845119	0.262532	0.0209979	0.0203008	0.16098	0.000481707	0.224769	FALSE
ENSG00000178104.22	5	0.959303	3.11787	36.5094	0.0374633	1:148823927:A:G	15787	15787	4	7	0.0729167	0.0416881	0.453244	0.214373	0.128887	0.123909	0.360188	0.000926226	0.502915	FALSE
ENSG00000269713.9	149	1.05252	34.1089	31.0106	0.0176823	1:149142114:G:GTA	38553	38553	9	10	0.104167	0.0116538	0.662349	0.24882	0.440356	0.43076	0.548182	0.000146845	0.765403	FALSE
ENSG00000274265.5	84	1.02789	29.0073	32.4914	0.0133126	1:149169688:G:A	-6060	-6060	7	8	0.0833333	0.010156	-0.589524	0.21693	0.318168	0.309249	0.494865	0.000150459	0.690958	FALSE
ENSG00000289614.2	84	1.031	27.8806	31.8094	0.0112477	1:149197754:T:C	20823	20823	30	41	0.427083	0.00779389	-0.481808	0.170666	0.262474	0.256995	0.463429	0.000159332	0.647066	FALSE
ENSG00000272755.1	7	1.01829	5.52073	34.9501	0.0453745	1:149237967:A:C	-26285	-26285	7	9	0.09375	0.0452186	0.66	0.317786	0.220778	0.218911	0.441148	0.000746818	0.615956	FALSE
ENSG00000286185.1	27	0.99159	8.80858	35.2685	0.0335322	1:149370620:A:G	-20003	-20003	4	6	0.0625	0.0342233	0.482691	0.219045	0.270773	0.263136	0.466135	0.000399912	0.650844	FALSE
ENSG00000288867.1	48	1.01123	25.8074	34.3885	0.00672274	1:149583381:G:A	-467	-467	13	15	0.15625	0.00624547	0.817311	0.280865	0.156184	0.155871	0.389492	0.000153534	0.543831	FALSE
ENSG00000291158.1	77	1.03945	37.1493	32.7719	0.0158861	1:149557948:C:T	-48261	-48261	4	6	0.0625	0.0126546	0.808196	0.307488	0.438356	0.429427	0.547977	0.000125434	0.765117	FALSE
ENSG00000150337.14	49	1.01059	15.7078	33.4227	0.0473412	1:149789421:G:A	6750	6750	4	5	0.0520833	0.0423394	0.350651	0.166409	0.532147	0.52827	0.58645	0.000251258	0.818836	FALSE
ENSG00000203814.7	37	0.998152	15.8814	33.0536	0.0339358	1:149780394:A:G	-31979	-31979	26	30	0.3125	0.0290143	-0.275661	0.121068	0.424158	0.422961	0.545086	0.00023078	0.761081	FALSE
ENSG00000270882.3	29	1.0024	14.9251	34.2701	0.0544624	1:149807571:C:T	-25086	-25086	4	6	0.0625	0.0519188	0.482188	0.239604	0.567443	0.565402	0.59978	0.000251901	0.837448	FALSE
ENSG00000288825.1	24	0.997144	13.8851	34.62	0.00944311	1:149811267:AAC:A	-31483	-31483	5	5	0.0520833	0.0090545	-0.866562	0.313565	0.126887	0.124299	0.36057	0.00026236	0.503448	FALSE
ENSG00000290791.1	23	0.98203	13.3808	34.8855	0.0026641	1:149807828:G:GAGAGAGAA	-35048	-35048	5	6	0.0625	0.00262067	-0.790767	0.244051	0.0372963	0.0374919	0.217091	0.000248213	0.303115	FALSE
ENSG00000290792.1	21	0.960939	10.4132	34.6712	0.029245	1:149843756:A:G	-7181	-7181	20	25	0.739583	0.0284786	0.302763	0.132494	0.285271	0.283305	0.478333	0.000279169	0.667876	FALSE
ENSG00000288859.1	21	0.986251	10.2668	34.443	0.00832967	1:149811267:AAC:A	-39794	-39794	5	5	0.0520833	0.00781512	-0.818059	0.289883	0.0858914	0.0855814	0.310057	0.000332084	0.43292	FALSE
ENSG00000270276.3	16	0.994248	8.83445	34.7934	0.0597997	1:149811267:AAC:A	-49892	-49892	5	5	0.0520833	0.0590357	-0.851274	0.436213	0.423458	0.422747	0.545059	0.000405212	0.761043	FALSE
ENSG00000184678.11	14	0.986312	7.64987	34.9258	0.0318599	1:149904818:A:T	18136	18136	4	5	0.0520833	0.0316761	-0.455284	0.203424	0.229777	0.224939	0.444514	0.000445926	0.620656	FALSE
ENSG00000184260.6	14	0.969242	7.60025	35.0951	0.0180322	1:149849089:C:G	-37829	-37829	23	26	0.270833	0.0181911	-0.349972	0.141242	0.143686	0.138923	0.376229	0.000403568	0.525312	FALSE
ENSG00000178096.9	14	0.985091	7.51637	34.2841	0.205083	1:149849089:C:G	-38801	-38801	23	26	0.270833	0.20035	-0.251507	0.1927	0.825917	0.825603	0.674719	0.000450465	0.942082	FALSE
ENSG00000159164.10	24	1.00743	10.893	33.4705	0.0709236	1:149939789:C:A	21945	21945	3	5	0.0520833	0.064694	0.535503	0.280742	0.548845	0.547908	0.594025	0.000355568	0.829412	FALSE
ENSG00000143368.10	25	1.00849	10.9296	33.371	0.0103518	1:149915891:A:AAC	-11913	-11913	6	9	0.09375	0.00862468	0.6163	0.221455	0.10439	0.105167	0.33832	0.0003566	0.472381	FALSE
ENSG00000014914.21	27	1.00023	11.3478	33.4067	0.156332	1:149966820:A:G	29941	29941	5	7	0.0729167	0.146663	-0.39688	0.267374	0.855214	0.854668	0.68363	0.000327023	0.954524	FALSE
ENSG00000264522.6	16	0.976764	6.17614	34.6263	0.0317907	1:150039387:A:T	28661	28661	3	5	0.0520833	0.0308696	-0.580616	0.258103	0.187681	0.18953	0.419238	0.000520821	0.585365	FALSE
ENSG00000136631.16	40	1.01541	12.6202	32.7836	0.0268442	1:150076793:A:T	9514	9514	3	5	0.0520833	0.02211	-0.532081	0.22217	0.282172	0.283792	0.478676	0.000321633	0.668355	FALSE
ENSG00000285184.5	41	1.01154	13.0856	32.6929	0.321028	1:150109783:A:G	42061	42061	4	6	0.0625	0.304288	-0.370774	0.355629	0.994901	0.993535	0.714836	0.000303266	0.998095	FALSE
ENSG00000023902.14	124	1.03016	27.075	30.7721	0.0196373	1:150149739:C:G	556	556	6	7	0.0729167	0.0127478	0.398129	0.151646	0.40306	0.401008	0.535972	0.000163289	0.748355	FALSE
ENSG00000285554.1	139	1.02959	27.9193	31.0173	0.0128494	1:150160470:C:CAA	-12579	-12579	4	5	0.947917	0.00816417	-0.876333	0.312447	0.293971	0.289687	0.481755	0.000157841	0.672654	FALSE
ENSG00000143401.15	110	1.00121	23.4119	31.3783	0.0348012	1:150226008:G:GTT	-10149	-10149	7	8	0.0833333	0.0256837	0.398784	0.171133	0.564344	0.563082	0.599673	0.000159458	0.837298	FALSE
ENSG00000118292.9	153	1.00001	28.0955	31.2607	0.010849	1:150294896:C:CAAAAAA	26696	26696	39	45	0.46875	0.00697897	0.603401	0.210495	0.270873	0.263958	0.466621	0.000131924	0.651523	FALSE
ENSG00000117362.13	155	1.00248	28.3252	31.117	0.0228804	1:150227079:A:C	-42501	-42501	4	6	0.0625	0.0157203	0.3916	0.154239	0.481152	0.479689	0.568992	0.000132808	0.794459	FALSE
ENSG00000159208.16	161	0.997413	27.6185	31.3086	0.0188915	1:150304756:C:CAAAA	22212	22212	5	5	0.0520833	0.0129818	-1.21648	0.464674	0.412459	0.410734	0.539355	0.000132117	0.753079	FALSE
ENSG00000266472.6	162	1.00204	26.901	30.8781	0.000489648	1:150294139:A:C	278	278	14	14	0.145833	0.000203056	0.580348	0.139912	0.0105989	0.0129631	0.126266	0.00013947	0.1763	FALSE
ENSG00000117360.13	212	0.999301	42.025	31.6008	0.0149937	1:150353739:GT:G	32258	32258	5	8	0.0833333	0.0104085	0.591793	0.21856	0.473753	0.47034	0.565049	8.78228e-05	0.788954	FALSE
ENSG00000163125.16	171	1.02786	51.1214	31.9607	0.00356623	1:150367784:G:A	4693	4693	7	8	0.0833333	0.00227611	0.822728	0.249887	0.157384	0.157145	0.390437	8.53789e-05	0.54515	FALSE
ENSG00000143374.18	115	1.02363	37.8438	31.6962	0.0170406	1:150440343:C:G	-47071	-47071	3	6	0.0625	0.0121098	-0.563023	0.212755	0.471053	0.466834	0.563936	0.000112557	0.787399	FALSE
ENSG00000143369.15	124	1.00502	44.0193	32.173	0.00373113	1:150550002:C:T	41940	41940	4	5	0.0520833	0.00247299	-1.07244	0.328797	0.156184	0.150013	0.385102	8.67693e-05	0.537702	FALSE
ENSG00000143382.16	150	1.03805	40.6777	30.7656	0.0306006	1:150548828:A:G	-541	-541	5	5	0.0520833	0.0209732	-0.701892	0.290338	0.706429	0.703492	0.640619	0.000113664	0.894469	FALSE
ENSG00000237781.3	149	1.01999	37.54	31.2553	0.00268262	1:150548980:TGCCGC:T	-8744	-8744	11	11	0.114583	0.00147612	-0.625707	0.181317	0.0870913	0.0908193	0.317663	0.000111105	0.443539	FALSE
ENSG00000203804.5	147	1.03957	36.7533	31.2373	0.00159419	1:150546135:AT:A	-15980	-15980	8	9	0.09375	0.00082433	0.801545	0.219001	0.0469953	0.0500349	0.249825	0.00012687	0.348819	FALSE
ENSG00000143384.14	161	1.00397	34.8204	30.7983	0.0522571	1:150549995:C:CTG	-29743	-29743	21	28	0.291667	0.0383424	-0.152967	0.0710682	0.841316	0.84475	0.680522	0.000109004	0.950184	FALSE
ENSG00000143420.19	140	1.00603	39.7568	32.8127	0.00482453	1:150589792:A:AT	-39820	-39820	5	6	0.0625	0.00358773	-0.771686	0.247138	0.174383	0.172707	0.403753	9.6651e-05	0.563743	FALSE
ENSG00000288880.2	138	1.01309	39.0871	32.4815	0.00274352	1:150587820:A:G	-41994	-41994	3	5	0.0520833	0.00186625	1.13713	0.337884	0.10129	0.0983174	0.328808	0.000102497	0.4591	FALSE
ENSG00000143457.11	178	1.03676	54.1867	32.4417	0.000596038	1:150689988:AT:A	-7166	-7166	3	5	0.0520833	0.000359492	-0.900255	0.227846	0.0241976	0.02758	0.185635	8.47219e-05	0.259194	FALSE
ENSG00000143452.16	220	1.01264	58.7207	32.5546	0.00566876	1:150689988:AT:A	-30907	-30907	3	5	0.0520833	0.0041063	-0.702622	0.228767	0.281572	0.27813	0.474815	6.80513e-05	0.662963	FALSE
ENSG00000163131.12	201	1.00786	43.2048	31.4932	0.0136683	1:150778141:C:T	12184	12184	16	23	0.239583	0.00927999	0.247097	0.0897309	0.448655	0.444401	0.553778	8.99111e-05	0.773216	FALSE
ENSG00000143387.14	155	1.02184	34.3517	30.7341	0.00112739	1:150809646:A:C	69	69	22	27	0.28125	0.000503939	0.691873	0.180481	0.0317968	0.0350762	0.209504	0.000122721	0.292521	FALSE
ENSG00000143437.21	58	1.00827	19.0531	32.2674	0.0128489	1:150831926:GA:G	-44783	-44783	3	5	0.0520833	0.00952322	-0.840431	0.306346	0.213979	0.215044	0.439456	0.000204342	0.613594	FALSE
ENSG00000143379.13	122	1.03306	33.9373	32.3474	0.00287183	1:150939256:ATTT:A	12988	12988	4	5	0.0520833	0.00191745	0.896702	0.267232	0.0849915	0.0848523	0.309227	0.000132449	0.431761	FALSE
ENSG00000259357.2	203	1.0085	44.3817	32.5176	0.0133289	1:150960220:T:A	-5025	-5025	9	9	0.09375	0.0102003	0.94796	0.34905	0.448955	0.444605	0.553798	8.78599e-05	0.773244	FALSE
ENSG00000143418.20	224	1.01627	48.329	31.7738	0.000949557	1:150991305:C:T	16302	16302	3	5	0.0520833	0.000518062	-0.713167	0.186507	0.0414959	0.0423833	0.232189	8.44592e-05	0.324195	FALSE
ENSG00000143412.10	244	1.02781	51.992	31.1874	0.0343298	1:150948588:T:C	-33661	-33661	5	5	0.0520833	0.0248497	-1.12081	0.478041	0.831417	0.830319	0.676435	8.39257e-05	0.944477	FALSE
ENSG00000143409.17	246	1.01961	54.6972	31.3458	0.0122054	1:150997516:T:C	-10860	-10860	5	6	0.9375	0.00804037	-0.360064	0.128101	0.482552	0.479742	0.568992	7.60938e-05	0.794459	FALSE
ENSG00000143363.17	246	1.0204	55.0388	31.2702	0.00194917	1:151025366:T:A	16946	16946	3	6	0.0625	0.00103758	0.622884	0.17409	0.0958904	0.0964061	0.326018	7.59691e-05	0.455206	FALSE
ENSG00000163141.20	235	1.028	52.1619	30.8974	0.00141721	1:151029139:CT:C	-7182	-7182	8	13	0.135417	0.000675067	0.82912	0.22224	0.0643936	0.0654794	0.278565	8.37433e-05	0.388948	FALSE
ENSG00000143443.10	218	1.02651	52.7587	31.1921	0.0125808	1:151077807:C:T	30056	30056	12	18	0.1875	0.0081542	-0.502229	0.179034	0.477352	0.474522	0.567119	8.2093e-05	0.791845	FALSE
ENSG00000213190.4	211	1.03355	48.3146	30.9253	0.00342089	1:151038001:CAAA:C	-22397	-22397	8	9	0.09375	0.00182777	0.964911	0.286064	0.138986	0.141425	0.37904	9.33091e-05	0.529237	FALSE
ENSG00000197622.13	204	1.02981	44.9712	30.554	0.0452803	1:151039584:A:G	-30741	-30741	30	42	0.5625	0.031956	-0.170863	0.0764761	0.869413	0.869409	0.687431	9.81371e-05	0.95983	FALSE
ENSG00000143458.12	204	1.00776	45.626	31.0859	0.00613432	1:151058315:G:A	-12263	-12263	5	5	0.0520833	0.00360859	1.2604	0.403934	0.247175	0.241464	0.455567	8.50899e-05	0.636088	FALSE
ENSG00000143434.17	116	1.03216	38.3294	31.7202	0.0175973	1:151109353:T:TACACAA	-37278	-37278	14	19	0.197917	0.0125776	-0.514114	0.195416	0.486551	0.478297	0.568601	0.000116683	0.793914	FALSE
ENSG00000163156.12	122	1.0424	43.6561	31.9459	0.00237676	1:151137165:G:A	-19499	-19499	3	6	0.0625	0.0014593	-0.406385	0.11762	0.0852915	0.0879393	0.313399	0.00010852	0.437585	FALSE
ENSG00000163155.12	127	1.02332	42.8282	31.5792	0.0148285	1:151133348:C:G	-32600	-32600	16	20	0.791667	0.0102562	-0.604492	0.222761	0.465953	0.461392	0.561638	9.92838e-05	0.784191	FALSE
ENSG00000163157.15	123	1.02771	38.7414	31.4769	0.00675922	1:151150013:C:T	-26271	-26271	3	5	0.0520833	0.00425954	0.917805	0.300192	0.217778	0.219688	0.441717	0.000112554	0.61675	FALSE
ENSG00000163159.15	112	0.994641	28.8737	31.8387	0.0139968	1:151173710:C:G	-21611	-21611	7	10	0.895833	0.0099302	0.42666	0.156479	0.340966	0.336889	0.509265	0.000124269	0.711065	FALSE
ENSG00000143398.20	113	1.01739	29.014	31.3182	0.00885016	1:151231211:CAA:C	33262	33262	5	6	0.0625	0.00561135	-0.799297	0.270806	0.224578	0.22021	0.4423	0.000141586	0.617565	FALSE
ENSG00000159352.16	122	0.970793	23.8453	32.0315	0.0319778	1:151259161:T:A	4452	4452	22	33	0.65625	0.0248755	0.153349	0.0654181	0.550445	0.552973	0.596313	0.00012975	0.832607	FALSE
ENSG00000143373.18	97	0.970062	19.4112	32.4286	0.0360625	1:151279661:T:C	-1957	-1957	25	31	0.677083	0.0293342	-0.31002	0.136447	0.521048	0.524058	0.585946	0.00015867	0.818131	FALSE
ENSG00000232671.8	97	0.962282	19.4505	32.5746	0.00613735	1:151256072:C:CG	-25928	-25928	25	41	0.427083	0.00448287	0.404966	0.133305	0.126287	0.1242	0.36051	0.000150644	0.503365	FALSE
ENSG00000143393.17	76	0.985565	17.2693	32.6558	0.0769748	1:151278349:G:GT	-49366	-49366	9	9	0.09375	0.0669776	0.381476	0.201773	0.749425	0.754072	0.65654	0.000196556	0.916699	FALSE
ENSG00000237976.2	86	1.02544	19.924	31.2014	0.0421426	1:151342811:G:C	-4127	-4127	10	10	0.104167	0.031232	0.717648	0.319754	0.563844	0.564499	0.599699	0.000215952	0.837335	FALSE
ENSG00000143390.18	87	0.999077	21.5248	32.7685	0.00247398	1:151342811:G:C	-4515	-4515	10	10	0.104167	0.00175197	-0.683874	0.201819	0.050195	0.052082	0.252877	0.000171228	0.353081	FALSE
ENSG00000143416.21	110	1.03016	22.7214	30.8861	0.0157839	1:151331495:TA:T	-41212	-41212	27	35	0.635417	0.0101109	0.362478	0.133295	0.29837	0.289756	0.481773	0.000194552	0.672679	FALSE
ENSG00000159377.11	145	1.02631	22.8955	30.198	0.036144	1:151379702:C:CA	-19859	-19859	12	15	0.15625	0.0239279	0.307956	0.130438	0.563144	0.557607	0.597724	0.000188881	0.834576	FALSE
ENSG00000143442.23	147	1.02506	20.2812	30.2496	0.0157721	1:151450465:G:A	-9029	-9029	30	48	0.5	0.00933158	-0.349032	0.12685	0.268873	0.264631	0.467024	0.00021169	0.652085	FALSE
ENSG00000143367.17	49	1.00362	17.9606	33.4397	0.0099494	1:151580196:G:A	39891	39891	4	5	0.0520833	0.00834225	-0.880153	0.31477	0.168383	0.16311	0.395806	0.000210865	0.552647	FALSE
ENSG00000143376.14	140	1.02094	37.1244	31.4209	0.0117524	1:151646884:G:GACACAC	34876	34876	5	6	0.0625	0.00778524	-0.429748	0.152202	0.349265	0.345323	0.512795	0.000112969	0.715995	FALSE
ENSG00000227045.1	158	1.03403	33.4756	30.5692	0.0302431	1:151725108:CT:C	24081	24081	5	6	0.0625	0.0202875	0.734534	0.302071	0.632037	0.628006	0.618689	0.000135013	0.863849	FALSE
ENSG00000143450.19	223	1.00916	36.2234	31.078	0.0365078	1:151738772:AT:A	-24128	-24128	20	23	0.239583	0.0263348	-0.575153	0.24798	0.737926	0.736831	0.651749	0.000108066	0.910009	FALSE
ENSG00000143436.11	223	1.01613	37.0366	31.0128	0.00638384	1:151769377:C:T	5881	5881	15	16	0.833333	0.00373141	0.423121	0.136155	0.207879	0.20474	0.431929	0.000110114	0.603084	FALSE
ENSG00000249602.1	220	1.01881	36.8769	30.8386	0.0278353	1:151800676:A:G	31175	31175	7	7	0.927083	0.0189995	0.8561	0.348083	0.639536	0.639055	0.621815	0.00011233	0.868214	FALSE
ENSG00000203288.6	189	0.997276	37.0653	31.5166	0.00599437	1:151793339:C:G	2535	2535	25	37	0.385417	0.00375294	0.47459	0.152824	0.19908	0.20084	0.429025	9.83637e-05	0.59903	FALSE
ENSG00000182134.17	186	0.99246	37.8057	31.8873	0.00805729	1:151830973:G:T	39557	39557	3	6	0.0625	0.00547162	0.547564	0.184906	0.269673	0.266842	0.468439	9.36554e-05	0.654061	FALSE
ENSG00000143365.20	181	1.00915	53.1223	31.8682	0.00405386	1:151842668:T:C	10823	10823	25	35	0.364583	0.00257901	-0.413947	0.127521	0.192181	0.190566	0.420089	7.36886e-05	0.586552	FALSE
ENSG00000225556.2	185	1.02192	55.7295	31.6144	0.0183158	1:151855702:C:G	15145	15145	26	29	0.302083	0.012986	0.578429	0.22096	0.633737	0.63382	0.620228	7.5691e-05	0.865998	FALSE
ENSG00000234614.1	182	1.0202	56.8696	31.6413	0.0383522	1:151851613:T:C	9736	9736	29	46	0.479167	0.0292685	-0.323351	0.142253	0.884412	0.888103	0.690634	7.34387e-05	0.964302	FALSE
ENSG00000196407.12	169	1.02702	48.9501	31.1793	0.0207424	1:151809654:G:T	-44058	-44058	3	6	0.0625	0.0141924	0.646959	0.250635	0.631137	0.630164	0.619725	8.87372e-05	0.865296	FALSE
ENSG00000159445.13	109	1.00624	30.5775	32.6165	0.00367985	1:151873093:A:G	-36544	-36544	3	5	0.947917	0.0026111	0.427477	0.131875	0.10129	0.104878	0.337957	0.000125818	0.471875	FALSE
ENSG00000197747.9	43	1.00023	10.4116	35.096	0.0234918	1:151980409:C:T	-13450	-13450	3	5	0.0520833	0.0236853	0.506426	0.214104	0.225277	0.21916	0.441386	0.000356423	0.616288	FALSE
ENSG00000229021.2	42	1.00299	9.58328	34.486	0.074381	1:151980409:C:T	-14122	-14122	3	5	0.0520833	0.0722245	-0.601461	0.324463	0.524448	0.521851	0.584653	0.000393648	0.816326	FALSE
ENSG00000163191.6	11	1.00233	4.53685	34.834	0.0248397	1:152030581:T:G	-17326	-17326	3	5	0.0520833	0.0244931	0.272085	0.115739	0.107689	0.107216	0.33998	0.000827965	0.4747	FALSE
ENSG00000289062.2	113	0.956224	4.51544	32.2443	0.113664	1:152924258:T:C	11124	11124	19	26	0.270833	0.0991174	0.319538	0.188611	0.434557	0.44045	0.551719	0.000625934	0.770341	FALSE
ENSG00000163220.11	158	1.01432	12.1822	31.3532	0.0145801	1:153380333:G:A	22479	22479	5	6	0.0625	0.00979729	-0.246074	0.09007	0.159184	0.158851	0.392051	0.000331079	0.547404	FALSE
ENSG00000163221.9	157	1.02066	12.9252	31.0103	0.0763025	1:153371898:C:G	-3723	-3723	5	7	0.0729167	0.0594504	0.295162	0.151508	0.634237	0.63301	0.620124	0.000323749	0.865853	FALSE
ENSG00000143546.10	151	1.01103	12.1862	31.5229	0.0035445	1:153380333:G:A	-10740	-10740	5	6	0.0625	0.0021045	-0.34264	0.103164	0.0384962	0.0407273	0.226602	0.000324662	0.316395	FALSE
ENSG00000238279.3	109	1.02579	25.4027	31.3635	0.00603076	1:153533096:C:T	-334	-334	9	12	0.125	0.00369262	0.727968	0.233953	0.134887	0.134151	0.371899	0.000169744	0.519267	FALSE
ENSG00000197956.10	109	1.01748	24.6822	31.4885	0.00604112	1:153561551:C:T	25307	25307	8	11	0.114583	0.00376943	-0.438359	0.141232	0.132787	0.13333	0.371119	0.000166512	0.518177	FALSE
ENSG00000196420.8	108	1.02849	24.4906	31.1791	0.0158434	1:153542291:G:T	526	526	5	7	0.0729167	0.0105198	-1.03982	0.384634	0.316368	0.310582	0.495673	0.0001788	0.692087	FALSE
ENSG00000196154.12	108	0.999835	24.6208	31.6473	0.0110866	1:153551957:A:C	1821	1821	6	8	0.0833333	0.00751541	-0.716411	0.252483	0.241176	0.240106	0.454146	0.000150382	0.634105	FALSE
ENSG00000189171.15	108	1.01112	23.0925	30.8273	0.000362021	1:153639949:T:G	8589	8589	31	39	0.59375	0.000142622	-0.704798	0.165117	0.00749925	0.00785943	0.0960501	0.000171468	0.134111	FALSE
ENSG00000160679.13	109	1.00647	24.0553	31.4334	0.0167253	1:153639577:A:G	5595	5595	29	41	0.572917	0.0115106	0.423307	0.158721	0.332767	0.330474	0.50616	0.000160143	0.70673	FALSE
ENSG00000143553.11	109	0.999748	24.8651	31.896	0.00347563	1:153672560:A:ATT	13856	13856	4	5	0.0520833	0.00219005	0.809384	0.244776	0.0840916	0.0829909	0.305806	0.000148827	0.426984	FALSE
ENSG00000143621.17	99	1.00056	23.3141	31.4814	0.00581639	1:153636409:C:CA	-34619	-34619	33	44	0.541667	0.00361116	-0.356152	0.11415	0.127287	0.126985	0.363864	0.000159504	0.508047	FALSE
ENSG00000143624.14	11	0.973293	5.54001	34.2687	0.0568567	1:153683929:C:G	-44121	-44121	17	22	0.229167	0.05424	0.291963	0.146582	0.292971	0.288685	0.481524	0.000568287	0.672331	FALSE
ENSG00000143554.14	84	1.0241	16.0263	30.1082	0.0241515	1:153777731:C:CCTT	3377	3377	12	20	0.208333	0.0149426	0.284951	0.11131	0.316768	0.313109	0.496715	0.000266372	0.693542	FALSE
ENSG00000284738.2	185	1.00397	34.9364	30.2878	0.0364276	1:153969680:G:A	46396	46396	13	15	0.15625	0.0243567	0.554767	0.235744	0.722328	0.725059	0.648379	0.000108642	0.905305	FALSE
ENSG00000143614.11	185	0.999571	36.2657	30.6409	0.0327097	1:153966654:C:T	43294	43294	25	38	0.604167	0.0223257	0.209412	0.0875918	0.69803	0.700794	0.639543	0.000101935	0.892966	FALSE
ENSG00000198837.10	164	1.03014	32.7245	30.2306	0.00600563	1:153987776:A:C	41058	41058	3	5	0.0520833	0.0030811	-0.726642	0.228522	0.169883	0.167982	0.399272	0.000135098	0.557487	FALSE
ENSG00000160741.17	149	0.981538	29.2603	31.4724	0.0028443	1:153939418:C:T	-19197	-19197	3	5	0.0520833	0.00163643	0.858991	0.25165	0.0865913	0.0843736	0.307684	0.000113128	0.429606	FALSE
ENSG00000143578.16	144	1.00914	26.5222	30.6604	0.0862344	1:153971587:C:T	4053	4053	10	13	0.135417	0.0665296	-0.477014	0.251871	0.90251	0.907093	0.695366	0.000147567	0.97091	FALSE
ENSG00000143543.15	136	1.02712	24.2332	30.7162	0.100241	1:153941208:C:A	-36466	-36466	11	12	0.125	0.0790375	0.427573	0.23635	0.914109	0.918931	0.697889	0.00017929	0.974432	FALSE
ENSG00000272654.2	135	1.01061	24.4479	30.8322	0.0660044	1:154012548:C:CT	34820	34820	4	7	0.0729167	0.0499274	-0.509471	0.250874	0.812519	0.808692	0.670747	0.000161479	0.936536	FALSE
ENSG00000177954.14	117	1.00691	23.5048	31.1283	0.0357069	1:154027098:CA:C	36335	36335	6	9	0.09375	0.0258145	-0.315999	0.135736	0.581142	0.571437	0.602519	0.000164321	0.841272	FALSE
ENSG00000143549.22	123	0.99916	29.5476	31.3661	0.0340586	1:154166689:C:CT	-27959	-27959	32	42	0.4375	0.0250511	0.221491	0.0946105	0.641836	0.641156	0.622625	0.000124801	0.869345	FALSE
ENSG00000163263.7	131	1.00772	32.9192	31.3108	0.0318169	1:154236277:T:C	29944	29944	27	33	0.34375	0.0231146	0.556537	0.234248	0.653035	0.651889	0.625494	0.000117901	0.873351	FALSE
ENSG00000143569.19	116	1.02395	31.1326	31.2619	0.00652018	1:154201391:C:CT	-18789	-18789	4	5	0.0520833	0.00396583	0.997663	0.323438	0.178482	0.175395	0.406989	0.000137062	0.568261	FALSE
ENSG00000143612.21	117	1.02059	31.5484	31.5541	0.030641	1:154219315:G:A	-1322	-1322	30	44	0.458333	0.0227008	0.173074	0.0726098	0.621238	0.616524	0.615713	0.000132658	0.859694	FALSE
ENSG00000143575.16	205	1.015	34.3214	29.8857	0.0492307	1:154252868:T:C	-19487	-19487	25	36	0.375	0.0331067	-0.200841	0.0905322	0.818118	0.819184	0.67328	0.00011804	0.940073	FALSE
ENSG00000143595.13	266	1.01218	39.8888	29.362	0.0820194	1:154320290:CTTTTTTT:C	-805	-805	11	11	0.114583	0.0572615	0.559441	0.284547	0.965003	0.966272	0.708965	9.99017e-05	0.989897	FALSE
ENSG00000143515.20	270	1.01654	39.1993	29.1841	0.0073397	1:154310773:A:T	-14752	-14752	27	31	0.322917	0.00328076	0.244377	0.0774279	0.247875	0.243735	0.457294	0.000104289	0.6385	FALSE
ENSG00000160712.13	231	0.999586	49.101	31.2089	0.00758634	1:154435509:C:CAA	30315	30315	23	27	0.28125	0.00465667	0.266356	0.0880997	0.314269	0.312159	0.496481	7.52962e-05	0.693216	FALSE
ENSG00000228013.1	230	1.02233	47.5862	30.6135	0.020194	1:154442920:C:A	36356	36356	21	27	0.28125	0.0129165	0.546065	0.208422	0.609139	0.611537	0.614492	8.88505e-05	0.857989	FALSE
ENSG00000273110.1	147	0.988575	42.282	32.1072	0.000876506	1:154452021:C:T	-27991	-27991	19	19	0.197917	0.000508447	-0.989949	0.258447	0.0350965	0.0379745	0.218042	8.17692e-05	0.304442	FALSE
ENSG00000160714.10	174	1.00398	38.2409	31.5198	0.0306005	1:154579241:C:T	20213	20213	7	10	0.104167	0.0225931	0.512009	0.21462	0.69543	0.69378	0.637432	9.92611e-05	0.89002	FALSE
ENSG00000233875.1	193	1.00845	46.4823	31.8212	0.00145672	1:154580040:CTG:C	377	377	18	21	0.21875	0.000835691	0.721108	0.197286	0.0624938	0.0638088	0.275972	8.38651e-05	0.385328	FALSE
ENSG00000160710.18	110	1.01497	37.5232	32.6145	0.0126887	1:154617152:A:C	-10861	-10861	4	8	0.0833333	0.00978719	0.266397	0.0974942	0.378262	0.373506	0.525245	0.000107951	0.733378	FALSE
ENSG00000287064.1	59	1.04123	20.9059	32.9303	0.0087952	1:154679275:A:T	7682	7682	26	35	0.364583	0.00688864	0.417107	0.145248	0.152785	0.15434	0.388496	0.000225014	0.542441	FALSE
ENSG00000163344.6	65	1.05513	28.8979	32.2211	0.0110331	1:154907533:C:CA	-29187	-29187	5	6	0.0625	0.00803522	0.560742	0.199478	0.256374	0.250554	0.460233	0.000175781	0.642604	FALSE
ENSG00000163346.17	83	1.04329	30.4228	32.3607	0.0145998	1:154969117:C:G	12994	12994	28	36	0.375	0.0110457	-0.392085	0.146099	0.344866	0.340416	0.510514	0.00015646	0.71281	FALSE
ENSG00000271380.1	89	1.02302	32.6136	32.3531	0.0334375	1:155003357:AC:A	41532	41532	15	19	0.802083	0.0268731	0.428617	0.185506	0.664534	0.660904	0.628246	0.000130141	0.877193	FALSE
ENSG00000163348.4	90	1.0284	34.8226	32.7354	0.049387	1:154943630:G:A	-20223	-20223	4	6	0.0625	0.0420456	0.423804	0.200821	0.820818	0.821154	0.67346	0.000125709	0.940323	FALSE
ENSG00000160691.19	103	1.04691	31.9994	31.3127	2.14045e-06	1:154974041:A:G	-354	-354	12	15	0.15625	5.30478e-07	0.880113	0.143718	9.999e-05	4.28268e-05	0.00269836	0.000151769	0.0037676	TRUE
ENSG00000173207.13	103	1.00905	32.4716	32.1405	0.0127278	1:155014317:C:T	39664	39664	29	32	0.666667	0.00928488	-0.501295	0.182055	0.339666	0.336012	0.509087	0.000120471	0.710817	FALSE
ENSG00000160688.19	105	1.0273	31.9787	31.4541	0.006225	1:155007865:T:C	24527	24527	10	13	0.135417	0.00387643	-0.454687	0.146995	0.174883	0.171034	0.402532	0.000136026	0.562038	FALSE
ENSG00000160685.14	106	1.00833	29.1547	31.5428	0.0548964	1:154969117:C:G	-33513	-33513	28	36	0.375	0.042998	0.210808	0.100381	0.80252	0.804839	0.669751	0.000133603	0.935144	FALSE
ENSG00000163354.15	127	1.02165	41.8757	31.2281	0.0314523	1:154998183:C:G	-35598	-35598	6	6	0.0625	0.0226396	1.11194	0.466266	0.731227	0.73007	0.649689	0.000100567	0.907134	FALSE
ENSG00000163357.11	127	1.02486	43.8987	31.6706	0.000419439	1:154995784:C:T	-38040	-38040	4	5	0.0520833	0.000206427	-1.29815	0.313388	0.0142986	0.0163496	0.141967	9.7726e-05	0.198222	FALSE
ENSG00000232093.1	120	0.987606	42.5662	32.2227	0.0456446	1:155013615:T:C	-32503	-32503	16	16	0.166667	0.0371342	0.567973	0.262114	0.865013	0.865832	0.686434	8.074e-05	0.958439	FALSE
ENSG00000143537.14	119	1.01736	39.1694	31.7943	0.0105681	1:155061442:C:T	10876	10876	14	15	0.15625	0.00726696	-0.437891	0.153609	0.332767	0.332244	0.506861	0.000104869	0.707709	FALSE
ENSG00000143590.14	130	1.00969	27.8481	30.8638	0.00896788	1:155033615:A:G	-45222	-45222	26	42	0.4375	0.00534464	-0.432215	0.145509	0.220578	0.217919	0.440808	0.000141	0.615482	FALSE
ENSG00000169242.12	153	1.0022	20.7105	31.247	0.0146299	1:155111700:T:TC	-16176	-16176	5	7	0.0729167	0.00970828	-0.809981	0.296079	0.265173	0.262086	0.466135	0.000181327	0.650844	FALSE
ENSG00000169241.19	153	0.991656	20.9609	31.8664	0.0726316	1:155167547:C:A	32203	32203	6	8	0.0833333	0.059749	-0.387247	0.199021	0.79672	0.796587	0.667316	0.0001681	0.931745	FALSE
ENSG00000179085.8	146	0.974301	21.1082	32.2898	0.0275619	1:155183111:C:T	42516	42516	14	20	0.208333	0.0217084	-0.342339	0.142476	0.458154	0.458175	0.560798	0.000149879	0.783018	FALSE
ENSG00000163462.19	116	0.983119	23.9734	32.3626	0.0221127	1:155167547:C:A	-6240	-6240	6	8	0.0833333	0.0172558	-0.448827	0.179531	0.428457	0.42319	0.545188	0.000139448	0.761223	FALSE
ENSG00000273088.2	119	0.971649	22.2886	32.3351	0.0849992	1:155214590:C:G	27318	27318	6	6	0.9375	0.0729723	0.671334	0.36315	0.864814	0.868052	0.687008	0.000139575	0.95924	FALSE
ENSG00000185499.17	124	0.973958	23.2085	32.282	0.0441277	1:155171419:C:CA	-21498	-21498	9	11	0.114583	0.0359804	-0.337436	0.154707	0.653635	0.659938	0.627814	0.000136014	0.87659	FALSE
ENSG00000231064.9	126	0.971817	22.5523	32.2584	0.0576027	1:155161430:A:ATTT	-33566	-33566	27	39	0.59375	0.047823	0.362912	0.176954	0.746625	0.747404	0.654748	0.000138089	0.914197	FALSE
ENSG00000173171.15	119	0.975204	22.2074	32.0167	0.0927219	1:155250077:C:A	41382	41382	28	36	0.375	0.0785852	0.131997	0.0728489	0.886711	0.889426	0.690875	0.00014327	0.964639	FALSE
ENSG00000169231.13	119	0.972019	21.9997	31.8776	6.91599e-05	1:155208991:T:A	-60	-60	18	22	0.229167	3.01568e-05	-0.652707	0.136249	0.00089991	0.00184317	0.0396151	0.000141741	0.0553129	TRUE
ENSG00000236263.1	114	0.99352	20.5296	31.7282	0.033912	1:155263609:GTTCT:G	49790	49790	3	5	0.0520833	0.0257861	0.746778	0.320709	0.510749	0.510585	0.579343	0.000173593	0.808912	FALSE
ENSG00000177628.16	122	0.967211	18.3358	32.4955	0.11491	1:155204315:C:T	-40384	-40384	31	46	0.520833	0.101626	-0.114764	0.0682628	0.89551	0.899062	0.693279	0.000164955	0.967995	FALSE
ENSG00000160767.23	125	0.971513	17.2499	32.7475	0.0480264	1:155272016:G:GT	16533	16533	33	43	0.447917	0.0408552	0.300011	0.141281	0.582442	0.585058	0.606072	0.000180218	0.846232	FALSE
ENSG00000116521.11	128	0.964572	17.6579	32.3035	0.00700094	1:155212581:C:T	-49849	-49849	12	16	0.166667	0.00497356	0.512207	0.170845	0.129887	0.127496	0.364617	0.000168419	0.5091	FALSE
ENSG00000176444.19	135	0.972407	15.8961	31.3761	0.00147447	1:155259046:CT:C	-19445	-19445	35	44	0.458333	0.000776714	0.679803	0.184673	0.0263974	0.0259899	0.181445	0.000196689	0.253344	FALSE
ENSG00000160752.15	110	0.967748	19.3205	32.0766	0.000132955	1:155319754:T:G	11006	11006	29	35	0.364583	6.50399e-05	0.585848	0.129221	0.00339966	0.00314898	0.0572077	0.00015708	0.0798767	TRUE
ENSG00000160753.17	103	0.994192	22.3612	31.9979	0.0378638	1:155362974:A:C	42080	42080	3	6	0.0625	0.0297816	0.512519	0.226237	0.580042	0.580779	0.605209	0.000160025	0.845027	FALSE
ENSG00000225855.7	98	0.980916	21.8666	32.1427	0.0481938	1:155345138:G:A	20962	20962	3	5	0.0520833	0.0391226	-0.701215	0.327173	0.663934	0.668179	0.630749	0.000150807	0.880689	FALSE
ENSG00000235919.5	65	1.02052	28.1963	33.0721	0.0350322	1:155529032:A:AT	-32994	-32994	4	6	0.0625	0.0300485	0.699111	0.309139	0.626337	0.625442	0.618214	0.000148362	0.863185	FALSE
ENSG00000116539.14	65	0.992394	28.6064	33.5368	0.0472663	1:155529032:A:AT	-34130	-34130	4	6	0.0625	0.042627	-0.288754	0.137236	0.751725	0.75228	0.656018	0.000123726	0.91597	FALSE
ENSG00000125459.18	65	1.01012	26.6751	32.7411	0.0612519	1:155573151:A:G	9916	9916	5	7	0.0729167	0.0528546	0.647639	0.323169	0.810519	0.811975	0.671631	0.000147573	0.93777	FALSE
ENSG00000246203.2	83	1.0056	24.6245	32.3196	0.0136145	1:155615516:C:G	-44729	-44729	7	10	0.104167	0.0101979	-0.627021	0.230868	0.283572	0.283962	0.478754	0.000155635	0.668463	FALSE
ENSG00000132676.16	90	1.01924	24.238	31.5428	0.0129643	1:155682290:T:A	-5670	-5670	20	30	0.3125	0.0088087	-0.455752	0.164262	0.267673	0.262715	0.466135	0.000171304	0.650844	FALSE
ENSG00000163374.20	92	1.00499	23.8259	31.5094	0.0437402	1:155709154:CT:C	20154	20154	4	7	0.0729167	0.0334202	-0.540245	0.243987	0.654135	0.653444	0.626184	0.000160268	0.874315	FALSE
ENSG00000203761.5	110	0.982289	34.4841	32.502	0.0614021	1:155705080:C:T	-40749	-40749	8	8	0.0833333	0.0521133	0.499184	0.248266	0.888711	0.890839	0.691296	9.64373e-05	0.965227	FALSE
ENSG00000116580.20	82	1.01659	28.4516	32.566	0.0143978	1:155835481:T:C	-23919	-23919	5	6	0.0625	0.0111387	-0.760279	0.283654	0.335466	0.330303	0.506017	0.000143713	0.70653	FALSE
ENSG00000132718.9	83	1.01837	29.5678	33.087	0.00218762	1:155906915:G:T	47348	47348	18	27	0.71875	0.00162108	-0.565035	0.165367	0.0578942	0.0591593	0.26774	0.00013973	0.373834	FALSE
ENSG00000143622.12	121	1.00049	30.9714	32.1127	0.00290113	1:155954446:A:G	43042	43042	8	12	0.875	0.00186475	-0.311702	0.0926106	0.0875912	0.0859329	0.310373	0.000120021	0.43336	FALSE
ENSG00000132680.11	139	1.01093	33.8619	31.7224	0.00400594	1:155936610:C:CT	2196	2196	4	5	0.0520833	0.00248727	0.559861	0.171759	0.122688	0.12374	0.359885	0.000116815	0.502492	FALSE
ENSG00000273002.1	129	1.03693	37.1157	31.2554	0.00215095	1:155956887:C:CA	-21912	-21912	17	21	0.78125	0.00115454	-0.657637	0.185793	0.0687931	0.0688372	0.284374	0.000123786	0.397059	FALSE
ENSG00000116584.22	139	1.00428	38.7827	31.5618	0.158273	1:156046333:CA:C	39263	39263	33	47	0.510417	0.137037	0.190806	0.12538	0.999	0.998733	0.715955	9.80501e-05	0.999657	FALSE
ENSG00000163479.14	124	1.00274	33.9392	31.1474	0.023056	1:156070519:A:G	49568	49568	24	33	0.34375	0.0159068	-0.235063	0.0927632	0.543146	0.545634	0.593093	0.000111015	0.828111	FALSE
ENSG00000160803.8	93	1.0145	26.0255	31.4243	0.0144753	1:156004396:AT:A	-49402	-49402	9	10	0.104167	0.00980353	0.566674	0.207438	0.314169	0.309094	0.494787	0.000155198	0.690851	FALSE
ENSG00000116586.12	90	1.00518	25.0381	31.426	0.0305619	1:156042720:C:T	-12062	-12062	6	8	0.0833333	0.0223579	0.238976	0.0999838	0.541046	0.537873	0.58996	0.000152682	0.823736	FALSE
ENSG00000132698.15	84	1.00825	20.5411	30.6463	0.00020713	1:156047242:AT:A	-13918	-13918	16	20	0.208333	7.22307e-05	0.82811	0.184088	0.00469953	0.00404567	0.0662838	0.000189522	0.0925493	TRUE
ENSG00000160789.24	61	1.01079	20.6655	31.5583	0.129911	1:156035640:C:G	-46933	-46933	33	44	0.458333	0.110459	-0.315705	0.192781	0.942706	0.942506	0.702963	0.000191226	0.981518	FALSE
ENSG00000196189.14	126	1.02832	38.1473	30.8588	0.00156323	1:156177535:T:C	30169	30169	26	33	0.34375	0.000747991	0.257268	0.0696359	0.050495	0.0528364	0.254541	0.000114706	0.355405	FALSE
ENSG00000160785.14	220	1.03019	57.4743	30.1953	0.0356828	1:156235122:ATT:A	41190	41190	12	13	0.135417	0.0235733	-0.452246	0.191032	0.870913	0.869888	0.687461	7.69609e-05	0.959873	FALSE
ENSG00000260238.6	242	1.01482	69.1919	30.8842	0.0246417	1:156212042:T:G	-940	-940	8	8	0.0833333	0.0166539	0.787338	0.313074	0.817118	0.818062	0.673115	5.84981e-05	0.939842	FALSE
ENSG00000160781.17	231	1.01336	65.2622	31.197	7.51784e-09	1:156249659:A:G	1542	1542	36	45	0.53125	9.01872e-10	-0.91244	0.110081	9.999e-05	4.01822e-07	7.21551e-05	6.14909e-05	0.000100747	TRUE
ENSG00000198952.8	174	1.01606	56.7968	32.1784	1.18799e-08	1:156238439:A:G	-44386	-44386	38	46	0.520833	2.68864e-09	-0.930479	0.117684	9.999e-05	5.33484e-07	9.2804e-05	7.17813e-05	0.000129578	TRUE
ENSG00000163472.19	172	1.01467	54.7869	31.7536	0.00358837	1:156247462:G:C	-35473	-35473	6	8	0.0833333	0.00221576	0.597424	0.18091	0.176482	0.173361	0.404261	7.38113e-05	0.564452	FALSE
ENSG00000198715.13	169	1.01585	53.3292	32.4342	2.04826e-08	1:156250265:T:C	-45424	-45424	37	47	0.510417	5.59338e-09	-1.02442	0.133851	9.999e-05	8.72881e-07	0.000133124	7.63541e-05	0.000185876	TRUE
ENSG00000163468.15	65	1.00274	13.9332	32.2365	0.0285577	1:156337389:C:G	-30484	-30484	10	15	0.15625	0.0224398	-0.445963	0.186706	0.332667	0.330872	0.506282	0.000270378	0.7069	FALSE
ENSG00000125462.20	65	1.00873	23.0308	32.578	0.00926825	1:156469208:T:C	12445	12445	28	40	0.416667	0.00696754	-0.448198	0.156318	0.192781	0.189674	0.419238	0.00016952	0.585365	FALSE
ENSG00000116604.19	64	0.979182	22.5501	33.1371	0.0144905	1:156502290:T:G	1511	1511	6	8	0.916667	0.0119491	0.600209	0.226341	0.289871	0.289928	0.481896	0.00014466	0.672851	FALSE
ENSG00000187862.13	162	1.01406	18.9228	31.2886	0.0205942	1:156597704:C:T	17981	17981	24	40	0.416667	0.0142516	-0.281678	0.109196	0.326367	0.318977	0.500787	0.000212876	0.699227	FALSE
ENSG00000163382.13	171	1.01781	21.4049	31.6414	0.045403	1:156638602:A:C	46846	46846	3	6	0.0625	0.0352047	-0.346521	0.158161	0.627137	0.622577	0.617647	0.000192362	0.862394	FALSE
ENSG00000160818.17	174	1.01251	21.5805	31.2706	0.0244775	1:156562458:T:C	-39038	-39038	3	6	0.0625	0.0172229	0.558741	0.223425	0.415258	0.408193	0.538901	0.000184982	0.752444	FALSE
ENSG00000143320.9	104	1.02388	36.6623	31.297	0.013199	1:156707833:C:A	2017	2017	5	5	0.0520833	0.00871465	0.982782	0.353668	0.374763	0.374161	0.525447	0.00011635	0.733659	FALSE
ENSG00000223356.1	117	1.01818	43.0422	31.7715	0.00682814	1:156761939:C:CA	48765	48765	20	27	0.28125	0.00449372	0.588921	0.193918	0.243876	0.247563	0.459265	9.58926e-05	0.641252	FALSE
ENSG00000143303.12	140	1.02677	50.0886	31.7369	0.0181356	1:156709553:A:G	-18889	-18889	20	29	0.302083	0.0130233	-0.315372	0.120526	0.592341	0.588288	0.606814	8.65968e-05	0.847268	FALSE
ENSG00000143319.17	142	1.03078	51.0376	31.7549	0.0102409	1:156759057:T:C	30291	30291	9	13	0.135417	0.00698575	0.386279	0.134771	0.393261	0.393826	0.533195	8.69552e-05	0.744477	FALSE
ENSG00000143314.12	166	1.00503	63.1404	32.5415	0.00133196	1:156703032:T:TA	-38559	-38559	18	24	0.25	0.000869207	0.335856	0.0922389	0.0792921	0.0795375	0.301374	6.0498e-05	0.420796	FALSE
ENSG00000143294.15	182	1.01252	64.5209	32.2422	0.00110581	1:156794385:G:A	43775	43775	4	5	0.0520833	0.000671918	-0.742303	0.198882	0.0628937	0.0662952	0.279596	6.18908e-05	0.390388	FALSE
ENSG00000143321.19	194	1.02034	65.7979	32.1897	0.0287094	1:156807690:G:A	40765	40765	5	5	0.0520833	0.0224688	-0.510704	0.21386	0.848015	0.848128	0.681572	6.3527e-05	0.951649	FALSE
ENSG00000198400.14	134	1.02871	38.7692	31.9614	0.0263174	1:156789793:G:A	-25843	-25843	24	33	0.34375	0.0200049	0.459363	0.188448	0.635936	0.63237	0.620124	0.000113118	0.865853	FALSE
ENSG00000027869.12	134	1.01658	41.1433	32.6336	0.0065955	1:156775707:C:T	-41141	-41141	5	5	0.0520833	0.00488066	1.16706	0.388329	0.227977	0.231384	0.449315	9.93861e-05	0.627359	FALSE
ENSG00000187800.14	130	1.01971	33.5356	31.6125	0.000116094	1:156907665:T:C	13967	13967	3	6	0.9375	4.93981e-05	1.09527	0.23677	0.00269973	0.0034551	0.0600106	0.000124166	0.0837902	TRUE
ENSG00000132694.19	58	1.03794	12.3293	33.6449	0.0496088	1:157033735:C:A	-12007	-12007	4	7	0.0729167	0.0451731	-0.285583	0.137475	0.462554	0.448129	0.555896	0.000374335	0.776174	FALSE
ENSG00000117036.12	48	0.997054	12.0165	32.9033	0.129931	1:157135998:T:C	-2476	-2476	11	17	0.177083	0.11815	0.164752	0.102843	0.808019	0.813016	0.671809	0.000302993	0.938019	FALSE
ENSG00000290592.1	64	1.00372	13.4678	32.2593	0.0614468	1:157184216:T:C	13100	13100	4	7	0.0729167	0.0512637	-0.485156	0.240366	0.572743	0.572658	0.602806	0.000281357	0.841673	FALSE
ENSG00000271736.2	115	0.973512	13.5004	32.2446	8.3704e-05	1:157280467:TAAC:T	6707	6707	17	22	0.229167	4.12149e-05	0.575669	0.122838	0.00079992	0.00136547	0.0320722	0.000233245	0.0447811	TRUE
ENSG00000286151.1	65	1.01412	12.5696	32.309	0.00867301	1:157422647:G:A	21720	21720	21	35	0.364583	0.00626855	0.454582	0.156292	0.0994901	0.0999321	0.33053	0.000320508	0.461505	FALSE
ENSG00000143297.19	108	1.03198	23.255	32.2255	0.00060275	1:157545568:A:G	-6947	-6947	8	13	0.135417	0.000347395	0.608496	0.153543	0.00979902	0.011987	0.121766	0.000192064	0.170016	FALSE
ENSG00000160856.21	88	1.01372	34.6452	32.9192	1.12472e-05	1:157696854:T:C	-3915	-3915	31	45	0.46875	5.88996e-06	0.574155	0.107704	0.00019998	0.000347823	0.0123326	0.000116064	0.0172195	TRUE
ENSG00000132704.16	140	1.00959	32.8131	31.6271	3.3741e-05	1:157814465:G:A	37333	37333	12	18	0.1875	1.26947e-05	0.660582	0.130101	0.00079992	0.00103259	0.026247	0.000119599	0.0366475	TRUE
ENSG00000163534.15	156	1.00828	28.9712	31.3031	4.90688e-05	1:157814465:G:A	-5655	-5655	12	18	0.1875	1.73491e-05	0.597317	0.120086	0.00109989	0.00134101	0.0317658	0.00013441	0.0443532	TRUE
ENSG00000158473.8	179	1.01139	15.5938	30.9141	0.0878172	1:158198875:G:C	20845	20845	3	5	0.0520833	0.0690586	0.470309	0.250739	0.755224	0.757792	0.657331	0.000254286	0.917803	FALSE
ENSG00000158477.7	130	1.01803	16.0957	31.1947	0.0561904	1:158207284:AT:A	-47141	-47141	31	47	0.489583	0.042927	0.369586	0.175923	0.60374	0.597946	0.609907	0.000256098	0.851587	FALSE
ENSG00000158481.13	136	1.00383	16.1769	30.4444	0.191714	1:158255229:C:G	-34694	-34694	8	11	0.114583	0.161128	-0.246107	0.17191	0.968103	0.967796	0.709407	0.000234403	0.990514	FALSE
ENSG00000158488.16	108	1.00068	12.4479	30.7255	0.0719692	1:158307215:T:G	-46481	-46481	4	5	0.0520833	0.0545695	-0.663067	0.333376	0.60364	0.605049	0.612172	0.000298931	0.85475	FALSE
ENSG00000163554.15	142	1.00446	30.8202	33.5551	0.00349927	1:158664631:G:C	-22084	-22084	18	30	0.3125	0.00285254	0.413111	0.128752	0.0991901	0.101197	0.332699	0.000123511	0.464533	FALSE
ENSG00000197403.5	125	1.03423	57.5427	33.7443	0.0115021	1:158799194:T:C	26999	26999	5	7	0.0729167	0.0100436	0.959417	0.35246	0.470853	0.469677	0.565049	7.8652e-05	0.788954	FALSE
ENSG00000163563.8	237	1.01645	52.0909	31.2974	0.00144726	1:158813155:T:A	-18196	-18196	5	6	0.0625	0.000749074	1.16511	0.315409	0.0672933	0.0691431	0.284573	7.84433e-05	0.397337	FALSE
ENSG00000163564.15	199	1.02734	59.9421	31.7403	0.00762196	1:158937944:C:CA	7148	7148	5	7	0.0729167	0.00504638	-0.63264	0.211409	0.360164	0.354807	0.516159	7.26021e-05	0.720691	FALSE
ENSG00000163565.20	396	1.0322	93.3586	31.4529	0.00407171	1:158952845:A:G	-47123	-47123	16	20	0.791667	0.00242468	-0.315281	0.0964453	0.305369	0.301923	0.490788	4.79297e-05	0.685267	FALSE
ENSG00000163568.16	38	0.989811	12.86	31.6716	0.0295332	1:159197500:A:C	9657	9657	9	11	0.114583	0.0220509	0.260488	0.108715	0.328867	0.324631	0.503795	0.000270944	0.703428	FALSE
ENSG00000213088.12	41	0.993664	13.8079	32.0418	0.00442702	1:159207958:G:A	4651	4651	23	29	0.302083	0.00291645	0.415231	0.129747	0.0593941	0.0606397	0.270421	0.000258332	0.377578	FALSE
ENSG00000179639.11	29	0.999623	7.85735	33.7835	0.0230308	1:159303251:G:A	13537	13537	6	10	0.104167	0.0206639	0.434187	0.179132	0.170483	0.16743	0.39908	0.000470551	0.557218	FALSE
ENSG00000158716.9	118	1.0047	31.8642	32.8972	0.0121415	1:159803847:A:G	22915	22915	7	10	0.104167	0.00965124	0.355891	0.12998	0.328867	0.320239	0.501735	0.000119636	0.700551	FALSE
ENSG00000181036.14	152	1.02435	46.8099	32.3183	0.0353486	1:159820543:T:C	20032	20032	8	11	0.114583	0.0284379	-0.49025	0.214482	0.808019	0.807705	0.670478	9.13816e-05	0.93616	FALSE
ENSG00000158714.11	182	1.05259	65.6092	31.9517	0.00500805	1:159872298:T:A	45487	45487	4	5	0.0520833	0.00328956	0.611544	0.193822	0.257474	0.257661	0.46378	7.64016e-05	0.647557	FALSE
ENSG00000272668.2	184	1.03232	66.2074	31.9713	0.00199775	1:159868351:CCT:C	13481	13481	3	6	0.0625	0.00121313	-1.02762	0.291786	0.115088	0.114453	0.350061	6.7626e-05	0.488775	FALSE
ENSG00000256029.6	160	0.998277	78.4012	33.9263	0.0353415	1:159830308:A:G	-42745	-42745	6	6	0.0625	0.0325214	-0.873199	0.392203	0.938106	0.940643	0.702475	4.67857e-05	0.980835	FALSE
ENSG00000290105.1	139	1.03202	62.9033	32.958	0.0120489	1:159843227:C:T	-46980	-46980	5	7	0.0729167	0.009641	-0.781372	0.285331	0.519648	0.51847	0.583068	7.10561e-05	0.814113	FALSE
ENSG00000213085.10	131	1.02837	57.4141	32.6595	0.000480013	1:159887541:A:G	-12624	-12624	26	36	0.375	0.000298719	0.599007	0.149183	0.0229977	0.0242586	0.174943	7.62458e-05	0.244266	FALSE
ENSG00000158710.15	99	1.03622	40.4235	32.7642	0.0230578	1:159892103:AT:A	-33404	-33404	11	11	0.114583	0.0187804	0.564676	0.229136	0.59894	0.594685	0.6087	0.000113208	0.849902	FALSE
ENSG00000224259.9	56	1.02176	22.0641	33.6984	0.0509859	1:159921370:TAAC:T	-36665	-36665	21	27	0.28125	0.046649	-0.385154	0.186746	0.677432	0.676355	0.632727	0.000190936	0.88345	FALSE
ENSG00000162729.14	31	1.00957	11.9321	32.3703	0.00945722	1:160092682:C:T	-6261	-6261	17	20	0.208333	0.00693484	-0.472583	0.164717	0.106189	0.104564	0.337685	0.000328739	0.471496	FALSE
ENSG00000162734.13	97	1.02497	26.5894	31.6725	0.0197782	1:160254910:T:A	49530	49530	8	10	0.104167	0.0142181	0.485217	0.18803	0.409359	0.400079	0.535687	0.000161411	0.747957	FALSE
ENSG00000227741.1	107	1.02974	27.1869	31.9368	0.0240901	1:160169617:C:T	-39252	-39252	31	42	0.5625	0.0181284	0.445549	0.17971	0.474053	0.470493	0.565126	0.000162229	0.789062	FALSE
ENSG00000228606.4	139	1.03202	28.6925	31.6899	0.0134044	1:160273736:TCTCCTGC:T	12005	12005	3	6	0.0625	0.00930378	0.81891	0.29749	0.314269	0.306343	0.493051	0.000155725	0.688426	FALSE
ENSG00000132716.19	137	1.03345	24.853	30.543	0.00574529	1:160300346:A:AAAAT	37795	37795	11	14	0.145833	0.00307986	-0.482833	0.151839	0.123788	0.123153	0.359587	0.000181225	0.502075	FALSE
ENSG00000258465.8	165	1.04067	28.4561	29.8922	0.0201468	1:160262716:T:A	-22414	-22414	19	34	0.354167	0.0118251	0.424694	0.159898	0.427057	0.420143	0.543843	0.000164843	0.759345	FALSE
ENSG00000162736.18	148	1.02389	40.4452	30.6752	0.0116735	1:160333626:G:A	-9668	-9668	26	29	0.697917	0.00700848	-0.512877	0.17902	0.372963	0.366631	0.522045	0.000105477	0.728909	FALSE
ENSG00000122218.17	147	1.0344	41.8454	31.1404	0.00414477	1:160380592:AT:A	37026	37026	19	24	0.25	0.00234985	-0.376259	0.114691	0.148285	0.147828	0.38334	0.000108247	0.535242	FALSE
ENSG00000171786.6	133	1.01706	39.356	31.3571	0.0151312	1:160337874:T:C	-29197	-29197	13	17	0.177083	0.0102125	-0.483176	0.177943	0.447155	0.442963	0.552867	0.00010419	0.771944	FALSE
ENSG00000162739.14	212	1.03696	51.1718	31.3235	0.0224513	1:160498502:G:C	-24760	-24760	10	14	0.145833	0.0157403	-0.209544	0.0825498	0.674333	0.672614	0.632032	8.98124e-05	0.88248	FALSE
ENSG00000066294.15	188	1.01649	50.2327	31.8406	0.000500336	1:160546004:C:T	-33512	-33512	26	40	0.583333	0.000260538	-0.430906	0.106072	0.0205979	0.0232002	0.171511	8.13635e-05	0.239474	FALSE
ENSG00000117090.16	198	1.02304	83.9823	32.8609	0.00429938	1:160636209:G:A	-10835	-10835	7	10	0.104167	0.00319705	0.349943	0.110535	0.294671	0.293077	0.484307	5.05576e-05	0.676218	FALSE
ENSG00000228863.8	224	1.04463	87.6462	31.9851	5.11874e-05	1:160621560:CAA:C	-49220	-49220	31	45	0.46875	2.24068e-05	-0.562978	0.115146	0.00219978	0.00344948	0.0600066	5.47428e-05	0.0837846	TRUE
ENSG00000117091.10	196	1.04807	79.2958	31.6982	0.0498322	1:160678759:C:T	-33072	-33072	22	25	0.739583	0.0391563	-0.261947	0.122242	0.978202	0.980775	0.712246	6.16687e-05	0.994479	FALSE
ENSG00000026751.17	165	1.01813	68.8686	32.7649	0.000585462	1:160757101:G:T	18044	18044	13	20	0.208333	0.000377582	-0.417952	0.106238	0.0365963	0.0370036	0.215467	5.99203e-05	0.300848	FALSE
ENSG00000122224.18	213	1.01254	68.9929	32.1262	0.00241447	1:160839495:A:G	43421	43421	30	44	0.458333	0.00153163	0.24273	0.0706121	0.149985	0.149338	0.384601	5.78864e-05	0.537002	FALSE
ENSG00000122223.13	236	0.985446	52.17	31.9898	7.42278e-05	1:160838686:C:G	-24201	-24201	31	43	0.447917	3.36546e-05	-0.552249	0.116165	0.00359964	0.00421558	0.0678229	6.50022e-05	0.0946983	TRUE
ENSG00000179914.5	190	1.00959	34.4208	32.1635	0.0037557	1:160861504:T:C	-23676	-23676	9	15	0.15625	0.0024869	-0.55948	0.171639	0.117788	0.118616	0.354527	0.000114014	0.495011	FALSE
ENSG00000158764.7	209	1.02865	38.7831	31.2795	0.0523333	1:161002956:GT:G	48147	48147	8	10	0.104167	0.0399502	-0.438321	0.205425	0.868213	0.869772	0.687461	0.000113039	0.959873	FALSE
ENSG00000158769.18	301	1.02232	62.6382	30.2986	0.0013115	1:161019594:C:CA	-1750	-1750	5	6	0.0625	0.000545222	0.614116	0.161359	0.0763924	0.0739017	0.293219	6.75003e-05	0.409409	FALSE
ENSG00000270149.5	265	1.02868	60.9019	30.5741	0.000918293	1:160995545:G:A	-43417	-43417	12	12	0.125	0.000385559	0.874842	0.222784	0.0469953	0.0494719	0.248887	7.20078e-05	0.34751	FALSE
ENSG00000158773.14	235	1.03045	55.6994	30.6171	0.00157457	1:161039013:G:T	-6964	-6964	6	8	0.0833333	0.000718052	-0.381926	0.102975	0.0735926	0.076978	0.296753	7.95302e-05	0.414343	FALSE
ENSG00000186517.14	192	1.01093	51.9676	31.188	0.000871664	1:161043522:T:C	-26448	-26448	18	24	0.25	0.000416285	-0.261213	0.0669743	0.0423958	0.0426326	0.232651	7.61223e-05	0.324841	FALSE
ENSG00000143256.5	85	1.05228	33.0224	31.6649	0.00898413	1:161130546:T:A	12491	12491	4	5	0.0520833	0.00598085	-0.771134	0.263471	0.237776	0.235669	0.452041	0.000151473	0.631166	FALSE
ENSG00000158793.14	84	1.02903	32.2039	32.108	0.0072594	1:161151520:C:T	33434	33434	9	10	0.104167	0.00503523	0.396032	0.132304	0.19948	0.197766	0.426622	0.000136416	0.595674	FALSE
ENSG00000158796.17	89	1.02047	30.0611	31.4453	0.0131704	1:161122971:A:G	-9717	-9717	7	9	0.09375	0.00885568	0.55632	0.200662	0.329967	0.319185	0.500859	0.000139122	0.699328	FALSE
ENSG00000143222.12	99	1.02013	32.9978	31.3254	0.044259	1:161165769:A:G	12993	12993	30	45	0.46875	0.0333281	0.189774	0.0856589	0.769223	0.769097	0.659471	0.000126496	0.920792	FALSE
ENSG00000224985.1	90	1.0154	32.8328	31.9574	0.0115007	1:161173522:T:C	14173	14173	21	27	0.28125	0.00813445	0.633272	0.22567	0.310869	0.308877	0.494653	0.000123679	0.690664	FALSE
ENSG00000143258.17	89	1.02168	30.7194	31.1957	0.0157247	1:161177981:A:G	18531	18531	3	5	0.0520833	0.0104531	0.70995	0.262364	0.380062	0.375078	0.525928	0.000137098	0.734331	FALSE
ENSG00000143224.18	100	1.03592	35.4215	31.1111	0.016879	1:161151520:C:T	-14536	-14536	9	10	0.104167	0.0111968	0.420743	0.157099	0.441956	0.435563	0.549726	0.000128968	0.767559	FALSE
ENSG00000158850.15	125	1.04466	49.2373	31.2985	0.0184559	1:161178675:C:CT	707	707	12	15	0.15625	0.0126363	0.435412	0.16562	0.589141	0.58058	0.605209	9.74414e-05	0.845027	FALSE
ENSG00000158864.13	159	1.04764	54.0722	31.4041	0.00509408	1:161213726:C:T	16622	16622	15	16	0.166667	0.00308228	-0.593189	0.18656	0.226077	0.221633	0.443001	9.02076e-05	0.618543	FALSE
ENSG00000158859.10	160	1.02897	50.4671	30.8387	0.0293127	1:161160912:C:T	-38143	-38143	5	5	0.0520833	0.0201338	-1.42713	0.586119	0.767323	0.768001	0.659435	8.70356e-05	0.92074	FALSE
ENSG00000158869.11	166	1.04171	50.7224	30.7737	0.000691049	1:161225923:CTTTTTTTT:C	10685	10685	6	8	0.0833333	0.000292286	-0.408598	0.101571	0.0272973	0.0294237	0.190567	9.30505e-05	0.26608	FALSE
ENSG00000158882.15	168	1.02601	51.7177	31.5253	0.0102398	1:161220460:T:C	-5479	-5479	20	22	0.770833	0.00677886	-0.542956	0.188659	0.40136	0.400184	0.53576	8.35051e-05	0.748059	FALSE
ENSG00000158887.19	148	1.00713	38.4764	32.0423	0.000189193	1:161306153:C:T	-3815	-3815	11	11	0.114583	9.46213e-05	-0.900901	0.204403	0.00609939	0.00698286	0.090609	0.000100522	0.126513	FALSE
ENSG00000143252.16	154	1.02319	36.3994	31.0399	0.00496359	1:161361715:T:C	47334	47334	6	7	0.0729167	0.00282766	-0.741591	0.230892	0.159084	0.15753	0.390854	0.000116725	0.545733	FALSE
ENSG00000289106.2	141	1.0554	33.5129	29.7587	0.000184678	1:161370744:G:A	6523	6523	8	8	0.0833333	4.90883e-05	-1.38987	0.300319	0.00279972	0.0045471	0.0705326	0.000151819	0.0984817	TRUE
ENSG00000288670.1	141	1.03564	31.8854	29.4672	8.1468e-06	1:161369154:C:T	1132	1132	10	12	0.125	1.12589e-06	-1.11855	0.19037	0.00019998	0.000190671	0.00825994	0.000143036	0.011533	TRUE
ENSG00000283696.1	160	1.03976	46.6456	30.7995	0.0133173	1:161363768:A:G	-35641	-35641	15	16	0.166667	0.00826406	0.755641	0.26988	0.457054	0.445841	0.554467	0.000100083	0.774179	FALSE
ENSG00000143226.16	158	1.00553	56.1887	32.3598	0.00547236	1:161503335:G:C	-2095	-2095	4	7	0.0729167	0.00384538	0.473603	0.15296	0.266373	0.262885	0.466135	6.81853e-05	0.650844	FALSE
ENSG00000273112.1	169	0.995859	58.8015	32.5038	0.00117833	1:161527427:C:T	14251	14251	15	18	0.1875	0.000756788	0.402768	0.109141	0.069993	0.067845	0.28237	6.14731e-05	0.394262	FALSE
ENSG00000203747.13	220	1.03274	76.4748	31.5791	0.00165772	1:161512730:T:C	-38238	-38238	17	20	0.791667	0.000919577	0.519265	0.1434	0.111189	0.109712	0.342722	5.86885e-05	0.478528	FALSE
ENSG00000244682.8	260	1.00044	85.0124	31.6437	0.0105708	1:161539842:G:C	-41497	-41497	3	5	0.0520833	0.00712933	-0.582314	0.203734	0.592141	0.594624	0.6087	4.37142e-05	0.849902	FALSE
ENSG00000225217.1	256	1.01484	83.083	31.6803	0.0142464	1:161644611:T:G	38320	38320	7	11	0.114583	0.00993438	-0.436666	0.160159	0.689931	0.690687	0.636858	4.87243e-05	0.889218	FALSE
ENSG00000289768.1	303	1.01614	93.2834	31.9201	0.000720122	1:161604838:A:G	-26618	-26618	10	12	0.125	0.000394765	0.723675	0.184674	0.059794	0.0617801	0.272564	4.37285e-05	0.38057	FALSE
ENSG00000072694.22	294	1.04946	73.9343	30.9558	0.00011911	1:161623928:C:A	-39215	-39215	6	6	0.0625	4.21709e-05	1.56247	0.33395	0.00519948	0.00679135	0.0884424	6.66475e-05	0.123488	FALSE
ENSG00000132185.18	261	1.01531	58.8469	30.4731	0.00680577	1:161715015:GA:G	8043	8043	18	23	0.239583	0.00369294	0.46261	0.148674	0.327667	0.323742	0.503428	6.89777e-05	0.702915	FALSE
ENSG00000162746.15	273	0.999949	67.0031	31.5301	0.00531967	1:161715380:C:T	-6164	-6164	23	31	0.322917	0.00329672	-0.554992	0.175944	0.30477	0.300521	0.48951	5.52997e-05	0.683482	FALSE
ENSG00000081721.12	239	1.028	59.4815	31.3537	0.0048195	1:161754337:T:A	4579	4579	3	5	0.0520833	0.00287608	0.901275	0.281164	0.236976	0.237863	0.45315	7.34409e-05	0.632714	FALSE
ENSG00000118217.7	222	1.02822	47.8979	30.5951	0.00524763	1:161792834:G:A	26536	26536	5	7	0.0729167	0.00280242	0.520202	0.161795	0.216578	0.211351	0.436476	9.13106e-05	0.609433	FALSE
ENSG00000162745.11	36	1.00757	14.8765	32.3854	0.0751478	1:161977595:G:A	-46274	-46274	27	39	0.40625	0.0641608	-0.319358	0.167075	0.683432	0.684287	0.634972	0.000260609	0.886585	FALSE
ENSG00000239887.6	151	1.0465	34.14	32.5714	0.00730297	1:162361277:CA:C	-17564	-17564	3	5	0.0520833	0.00539629	0.976027	0.328999	0.205779	0.202933	0.430626	0.000141938	0.601265	FALSE
ENSG00000198574.6	183	1.03075	37.0731	32.8358	0.0112666	1:162405019:C:T	-7119	-7119	3	5	0.0520833	0.00885201	0.577154	0.208164	0.335166	0.328594	0.505431	0.000119673	0.705712	FALSE
ENSG00000152332.16	125	1.01341	20.1585	33.2057	0.100467	1:162447252:A:G	-49999	-49999	10	15	0.15625	0.0915962	-0.275235	0.158665	0.877912	0.879087	0.688611	0.000199073	0.961478	FALSE
ENSG00000117143.14	54	0.992282	22.2297	35.275	0.0577681	1:162519686:T:G	-42036	-42036	3	5	0.0520833	0.0587661	0.479388	0.245374	0.734527	0.736307	0.651618	0.000159111	0.909827	FALSE
ENSG00000132196.16	97	1.00191	18.7945	31.7573	0.0333835	1:162795028:A:G	4326	4326	11	15	0.15625	0.0254157	0.526089	0.225324	0.475752	0.470807	0.56528	0.000199463	0.789277	FALSE
ENSG00000185630.20	102	0.982072	9.60431	32.9567	0.115178	1:164560219:G:C	4635	4635	22	28	0.291667	0.104343	-0.265195	0.159039	0.693531	0.697974	0.63883	0.000345974	0.891971	FALSE
ENSG00000143198.13	290	1.04604	52.1548	31.0406	0.000661266	1:165648735:T:C	17522	17522	27	41	0.572917	0.000295746	0.417782	0.103959	0.0261974	0.028465	0.188733	9.26992e-05	0.263519	FALSE
ENSG00000143149.13	245	1.02881	67.2008	32.2964	0.00732177	1:165673862:G:T	-24700	-24700	5	9	0.09375	0.0052145	0.564674	0.189496	0.379062	0.375867	0.526298	6.53085e-05	0.734847	FALSE
ENSG00000224358.1	75	0.989827	29.9019	34.5859	0.0254627	1:165722531:A:G	-46398	-46398	26	40	0.416667	0.0245866	-0.407958	0.173659	0.540146	0.542335	0.591694	0.00011652	0.826158	FALSE
ENSG00000143179.16	67	1.03054	18.372	32.6092	0.0525701	1:165862412:A:G	34798	34798	5	10	0.104167	0.0445074	0.380995	0.182802	0.621138	0.616306	0.615606	0.000241088	0.859544	FALSE
ENSG00000143183.18	68	1.0394	18.5305	32.7319	0.0377813	1:165850420:G:A	22665	22665	5	9	0.09375	0.0316318	0.350674	0.15664	0.492951	0.491716	0.573427	0.000251248	0.800651	FALSE
ENSG00000234142.2	27	1.01277	6.75432	34.598	0.0188065	1:166488537:C:T	-1770	-1770	5	9	0.09375	0.0181205	0.631606	0.254736	0.115088	0.116654	0.352284	0.000591441	0.491879	FALSE
ENSG00000143157.12	96	1.00635	24.5468	32.021	0.135469	1:166854939:C:G	15492	15492	5	9	0.09375	0.118333	0.249849	0.156044	0.970603	0.971576	0.710242	0.000156825	0.99168	FALSE
ENSG00000225171.2	92	1.01321	25.642	33.0514	0.000272101	1:166853692:G:GA	-15056	-15056	35	44	0.458333	0.000178388	0.836611	0.199562	0.00579942	0.00647732	0.08678	0.000156333	0.121167	FALSE
ENSG00000152382.6	91	1.00438	24.7282	32.4999	0.0244529	1:166868838:C:G	-7426	-7426	32	44	0.458333	0.019484	-0.288451	0.117792	0.449855	0.455725	0.559671	0.00015386	0.781445	FALSE
ENSG00000143167.12	12	0.946862	3.18427	35.8473	0.276799	1:167200686:CAA:C	34207	34207	22	34	0.354167	0.282631	0.0972956	0.0891622	0.647135	0.663527	0.62876	0.000836859	0.87791	FALSE
ENSG00000272205.2	55	1.00034	16.2721	32.9762	0.0651172	1:167249148:C:T	28560	28560	23	38	0.604167	0.0572977	-0.302828	0.15405	0.668533	0.665548	0.629397	0.000228221	0.8788	FALSE
ENSG00000143190.23	55	1.01446	15.202	31.8358	0.00779584	1:167234361:C:T	13485	13485	28	46	0.520833	0.00524116	-0.235332	0.0790257	0.110189	0.108104	0.340855	0.000265568	0.475921	FALSE
ENSG00000198821.12	230	1.03627	92.2789	32.3732	0.0409072	1:167469191:C:T	-49449	-49449	8	8	0.0833333	0.0334189	-0.490248	0.221406	0.975602	0.977142	0.711501	4.96198e-05	0.993438	FALSE
ENSG00000143162.9	265	1.03583	59.3516	31.3496	0.000501	1:167544347:G:GCTTTACTGT	-9458	-9458	4	6	0.0625	0.000233031	0.63438	0.154699	0.0218978	0.0254394	0.179484	7.69476e-05	0.250605	FALSE
ENSG00000198771.11	328	1.06126	105.094	31.3375	0.0051709	1:167679403:T:A	49310	49310	5	8	0.0833333	0.00310156	-0.802534	0.252586	0.39726	0.390734	0.531918	5.0005e-05	0.742695	FALSE
ENSG00000241666.2	328	1.05958	104.042	31.3633	0.0129549	1:167669987:ACACACG:A	39313	39313	23	34	0.645833	0.00860744	-0.463528	0.166512	0.725127	0.721507	0.64697	5.00544e-05	0.903337	FALSE
ENSG00000197965.12	174	1.02904	68.8247	31.6639	0.0292125	1:167673892:A:G	-47300	-47300	17	24	0.75	0.0217728	0.409259	0.170417	0.864514	0.863818	0.686041	6.38517e-05	0.95789	FALSE
ENSG00000143164.16	26	1.01377	12.2337	33.4834	0.204578	1:167959957:C:T	24174	24174	5	9	0.09375	0.194478	-0.223484	0.168947	0.935706	0.937702	0.701833	0.00032863	0.979939	FALSE
ENSG00000143158.11	27	0.996486	12.4362	34.0164	0.0879951	1:167938272:T:TTGTG	1200	1200	4	6	0.0625	0.0834669	0.446968	0.250857	0.680532	0.683289	0.634624	0.000291767	0.886099	FALSE
ENSG00000143155.13	79	1.01878	18.1523	31.7945	0.0250486	1:168197378:C:T	18416	18416	9	15	0.15625	0.0186446	-0.441201	0.178809	0.366563	0.360126	0.518399	0.00022809	0.723819	FALSE
ENSG00000213064.10	166	1.0359	46.4705	31.7308	0.0236865	1:168196917:A:G	-29021	-29021	3	6	0.0625	0.0174268	0.450886	0.180653	0.666533	0.657281	0.627179	9.83062e-05	0.875704	FALSE
ENSG00000143178.13	153	1.01691	48.5629	31.8397	0.0221987	1:168300872:T:C	19995	19995	3	5	0.0520833	0.0164202	-0.998333	0.396043	0.655534	0.656939	0.627179	8.43671e-05	0.875704	FALSE
ENSG00000143185.4	173	0.993567	19.4499	31.7885	0.114557	1:168535491:G:A	-8506	-8506	6	10	0.104167	0.097515	-0.391437	0.229909	0.90341	0.907203	0.695366	0.000183282	0.97091	FALSE
ENSG00000143184.5	176	0.982243	18.4781	31.541	0.000466066	1:168542046:T:C	-34559	-34559	16	19	0.197917	0.000224933	0.6723	0.163462	0.0105989	0.00939796	0.106766	0.000179953	0.149073	FALSE
ENSG00000143153.14	72	0.973885	10.1834	33.7365	0.0460069	1:169121474:T:C	15777	15777	10	14	0.145833	0.0420637	0.467995	0.221781	0.392961	0.393491	0.533147	0.000310031	0.74441	FALSE
ENSG00000143156.14	69	1.05338	30.8001	32.0206	0.00332031	1:169390202:CAAT:C	22254	22254	26	34	0.354167	0.00212645	0.440141	0.132673	0.0840916	0.0841734	0.307357	0.000163371	0.429149	FALSE
ENSG00000117475.14	69	1.03913	31.0989	32.3467	0.0059569	1:169389573:G:C	21603	21603	10	14	0.145833	0.00420503	0.344127	0.112376	0.157284	0.15589	0.389492	0.000149552	0.543831	FALSE
ENSG00000117479.15	132	1.0305	45.089	32.8096	0.0127462	1:169492168:G:A	6224	6224	3	6	0.0625	0.0100592	0.608902	0.223743	0.427257	0.424482	0.545842	9.82661e-05	0.762136	FALSE
ENSG00000198734.12	183	1.03675	58.4042	32.2602	0.00110271	1:169543286:C:T	-43302	-43302	10	13	0.135417	0.000672238	-0.690843	0.185103	0.0534947	0.0555155	0.26101	7.86016e-05	0.364438	FALSE
ENSG00000174175.17	125	1.01196	34.6592	32.3386	0.0204117	1:169667503:AAGAG:A	37310	37310	3	5	0.0520833	0.0157952	-0.562787	0.221836	0.511249	0.505011	0.576805	0.000114823	0.805369	FALSE
ENSG00000000460.17	149	1.02434	47.2102	31.7256	0.0115835	1:169701315:C:T	39308	39308	5	8	0.0833333	0.00796404	-0.861832	0.306204	0.416058	0.411303	0.539679	9.06018e-05	0.75353	FALSE
ENSG00000188404.10	172	1.05597	42.4509	30.4364	8.21116e-05	1:169693601:G:T	-18101	-18101	15	22	0.229167	2.36401e-05	-0.375081	0.0769955	0.00229977	0.0024749	0.048151	0.000120248	0.0672312	TRUE
ENSG00000171806.12	88	1.00456	21.7257	32.5977	0.00533585	1:169840512:C:CT	45548	45548	5	8	0.0833333	0.00387269	-0.659759	0.213267	0.111089	0.108448	0.34134	0.000175308	0.476599	FALSE
ENSG00000000457.14	132	1.01898	40.8587	32.0237	0.0226271	1:169856388:A:G	-37879	-37879	18	21	0.21875	0.0170877	-0.519664	0.207525	0.60274	0.599116	0.610495	0.000101487	0.852408	FALSE
ENSG00000075945.13	23	1.0056	5.58619	33.3608	0.11697	1:170049810:A:AC	-35398	-35398	4	5	0.0520833	0.108223	-0.594842	0.360864	0.49915	0.498338	0.575181	0.000685617	0.803101	FALSE
ENSG00000120370.14	74	1.02338	13.0228	30.9381	0.0283708	1:170541165:C:T	9346	9346	4	8	0.0833333	0.0196092	0.301226	0.123146	0.307369	0.301989	0.490824	0.000326391	0.685317	FALSE
ENSG00000076258.10	18	0.963076	8.38687	34.299	0.0157268	1:171265418:GA:G	-48766	-48766	18	25	0.260417	0.0146832	0.468642	0.182547	0.138986	0.136075	0.37347	0.000351557	0.521461	FALSE
ENSG00000117523.18	136	1.02803	32.2857	31.3604	0.0253995	1:171486107:CT:C	577	577	29	39	0.40625	0.0181104	-0.324154	0.130724	0.556144	0.551413	0.595533	0.000135296	0.831517	FALSE
ENSG00000233328.3	69	0.99799	13.6747	32.7765	0.156187	1:171699811:G:A	28872	28872	11	16	0.166667	0.142641	-0.272031	0.181382	0.89951	0.902279	0.693861	0.000267758	0.968809	FALSE
ENSG00000117533.15	131	1.03837	34.0189	31.9492	0.0019454	1:171772432:T:C	30358	30358	9	10	0.104167	0.00117386	0.784317	0.221956	0.0549945	0.0567992	0.263029	0.000136143	0.367256	FALSE
ENSG00000010165.20	122	1.00703	28.056	32.513	0.0637503	1:171742012:A:C	-39648	-39648	16	18	0.1875	0.054284	0.432609	0.217236	0.836416	0.840757	0.679276	0.000137769	0.948445	FALSE
ENSG00000135845.10	147	0.998531	26.6255	32.5194	2.67547e-06	1:172441827:G:A	-2259	-2259	33	43	0.552083	1.10179e-06	-0.829423	0.140991	9.999e-05	7.2282e-05	0.00392556	0.000137973	0.00548109	TRUE
ENSG00000094975.14	73	1.00726	16.6021	31.8912	0.0129262	1:172501931:TC:T	-30418	-30418	12	14	0.145833	0.00916274	0.490944	0.177953	0.193381	0.191485	0.421164	0.000233102	0.588054	FALSE
ENSG00000117560.8	43	1.00716	14.9553	33.1891	0.0421008	1:172669026:C:G	9923	9923	3	5	0.0520833	0.0367941	0.632779	0.291463	0.471253	0.471015	0.56528	0.000258608	0.789277	FALSE
ENSG00000117586.11	57	1.026	16.6236	33.1559	0.0681145	1:173220250:G:A	12919	12919	3	6	0.0625	0.0607883	0.484293	0.249959	0.681932	0.68052	0.633673	0.000259619	0.884771	FALSE
ENSG00000117592.9	178	1.04555	37.1744	32.0173	0.00187638	1:173446408:A:T	-30922	-30922	3	5	0.0520833	0.00114261	0.9556	0.269687	0.0560944	0.0585485	0.267148	0.000129677	0.373007	FALSE
ENSG00000203739.6	172	1.01935	30.9862	32.1809	0.0452304	1:173507343:CTT:C	17936	17936	18	24	0.25	0.0366477	-0.336607	0.154915	0.754925	0.755324	0.656778	0.000134097	0.917031	FALSE
ENSG00000076321.11	40	1.01774	9.09358	31.9292	0.0795675	1:173740477:T:G	25536	25536	3	5	0.0520833	0.066236	-0.383993	0.202525	0.528247	0.521417	0.584485	0.000452302	0.816092	FALSE
ENSG00000117593.12	187	1.01442	25.6577	30.2296	0.0637715	1:173819816:T:C	-4837	-4837	4	7	0.0729167	0.0458347	-0.605634	0.292491	0.811719	0.811667	0.671595	0.000157349	0.93772	FALSE
ENSG00000120334.16	186	1.01751	24.7268	30.3689	0.0192022	1:173796548:T:C	-28335	-28335	4	5	0.0520833	0.0118532	-0.673016	0.253484	0.381062	0.372493	0.524832	0.000166241	0.7328	FALSE
ENSG00000270084.2	232	1.02497	37.2308	29.962	0.0559223	1:173898583:T:C	36110	36110	5	7	0.0729167	0.0385863	-0.652547	0.303578	0.877812	0.877752	0.688481	0.000115294	0.961297	FALSE
ENSG00000185278.16	239	1.03465	36.6472	29.6469	0.0174674	1:173916574:C:T	48492	48492	16	23	0.239583	0.00971909	0.34491	0.126098	0.466953	0.459155	0.560949	0.000123767	0.783229	FALSE
ENSG00000234741.10	239	1.01547	36.4923	29.6916	0.0166986	1:173896886:A:G	28004	28004	6	8	0.0833333	0.00927657	0.517563	0.187938	0.458554	0.451621	0.558114	0.000111325	0.779271	FALSE
ENSG00000117601.15	225	1.04085	44.721	30.0347	0.0112102	1:173895806:G:T	-21521	-21521	5	7	0.0729167	0.00612776	-0.881201	0.302052	0.380562	0.376455	0.526601	0.000105026	0.735271	FALSE
ENSG00000135870.12	227	1.03325	31.4668	29.7884	0.07011	1:174015673:T:TTA	-6685	-6685	7	9	0.09375	0.049335	0.253514	0.124493	0.892111	0.892664	0.691488	0.000142995	0.965496	FALSE
ENSG00000152061.24	48	1.01756	20.0666	34.105	0.0352939	1:174207225:A:G	47815	47815	3	6	0.0625	0.0329407	0.340944	0.153531	0.507449	0.505491	0.576974	0.000204887	0.805604	FALSE
ENSG00000116161.18	145	1.02939	37.2665	31.0584	0.0670302	1:175001369:G:T	2206	2206	6	8	0.0833333	0.0516594	-0.46586	0.23122	0.919208	0.920639	0.698195	0.000118134	0.97486	FALSE
ENSG00000287697.1	145	1.02176	39.4889	32.1836	0.000420539	1:174997705:A:T	-1918	-1918	5	9	0.09375	0.000233096	0.899106	0.219259	0.0127987	0.01493	0.135359	0.000106711	0.188996	FALSE
ENSG00000120333.4	110	1.01189	29.0741	31.5585	0.0054587	1:175012670:A:G	-10755	-10755	14	15	0.15625	0.00340649	-0.566969	0.180446	0.144086	0.143175	0.380104	0.000136818	0.530723	FALSE
ENSG00000235750.10	135	1.00279	34.9762	31.6556	0.00558394	1:175173958:GC:G	-19041	-19041	5	6	0.0625	0.00354401	0.514737	0.164604	0.174883	0.176833	0.408029	0.000107756	0.569714	FALSE
ENSG00000227740.2	242	1.02615	68.7945	31.5149	0.00100879	1:175931054:A:G	9997	9997	9	10	0.895833	0.000524815	1.11907	0.293005	0.0608939	0.0618411	0.272564	6.28317e-05	0.38057	FALSE
ENSG00000143207.21	142	1.03793	47.2232	30.7149	0.0499615	1:176184306:A:G	-22980	-22980	13	19	0.197917	0.0362035	-0.198283	0.0910245	0.90391	0.905122	0.694684	9.78508e-05	0.969957	FALSE
ENSG00000236021.4	141	1.04093	49.9639	31.308	0.00282352	1:176167546:CA:C	-40100	-40100	3	5	0.0520833	0.00157719	-0.855622	0.249682	0.121988	0.119335	0.355145	9.40522e-05	0.495873	FALSE
ENSG00000116191.19	48	1.0269	23.7195	33.5886	0.145769	1:178734111:A:G	8946	8946	3	6	0.0625	0.137456	-0.292759	0.192585	0.973603	0.974849	0.710873	0.00018294	0.992562	FALSE
ENSG00000273062.1	49	1.03761	26.51	34.4052	0.00209013	1:178767547:C:T	41262	41262	4	7	0.0729167	0.00190937	0.695599	0.207205	0.0457954	0.0476209	0.244097	0.000173932	0.340823	FALSE
ENSG00000116199.12	75	1.0224	26.1383	32.5064	0.0354673	1:179028024:C:T	2220	2220	3	6	0.0625	0.0290112	0.62153	0.272964	0.60484	0.60113	0.611027	0.000161786	0.853151	FALSE
ENSG00000186283.14	130	1.0239	44.4111	32.1831	0.00988312	1:179076365:C:A	-5705	-5705	28	35	0.635417	0.00710074	-0.304409	0.106445	0.345365	0.34534	0.512795	9.60667e-05	0.715995	FALSE
ENSG00000143322.22	67	1.00057	17.3117	33.9445	0.0465201	1:179221523:G:A	-8161	-8161	3	6	0.0625	0.0431972	0.45963	0.219085	0.559844	0.561363	0.599446	0.000214814	0.836981	FALSE
ENSG00000057252.13	259	1.04083	55.0645	31.11	0.000878421	1:179331039:A:G	37325	37325	10	15	0.15625	0.000412822	0.535059	0.137085	0.0381962	0.0410038	0.227345	8.52961e-05	0.317432	FALSE
ENSG00000231966.1	100	1.00357	28.5074	30.924	0.0116182	1:179872657:T:C	36533	36533	5	5	0.0520833	0.00720583	-0.94729	0.331915	0.286171	0.281726	0.477344	0.000132822	0.666495	FALSE
ENSG00000169905.13	190	1.01544	46.7428	31.1161	0.0102259	1:179867910:G:C	-9893	-9893	3	5	0.0520833	0.00640988	-0.527216	0.181808	0.378562	0.374062	0.525447	8.6902e-05	0.733659	FALSE
ENSG00000143337.19	193	1.01561	47.4649	31.2394	0.0188724	1:179928129:C:G	46087	46087	5	6	0.0625	0.0128659	-0.410122	0.156439	0.588941	0.588218	0.606814	8.56653e-05	0.847268	FALSE
ENSG00000272906.1	194	1.03362	46.8233	30.6526	0.00327329	1:179880717:C:T	-1878	-1878	13	13	0.864583	0.0016576	0.876431	0.257112	0.130987	0.131567	0.369402	9.63178e-05	0.51578	FALSE
ENSG00000135837.17	109	1.00224	33.1451	32.8156	0.01442	1:179907853:C:G	-46821	-46821	30	36	0.625	0.0114738	-0.33528	0.125654	0.384262	0.381018	0.528463	0.000113334	0.73787	FALSE
ENSG00000260360.2	109	1.02206	33.1623	32.9142	0.00115101	1:179999154:G:A	44449	44449	7	12	0.125	0.000797542	0.721085	0.196388	0.0334967	0.0345424	0.208676	0.000127282	0.291365	FALSE
ENSG00000116260.17	244	1.05038	59.8802	31.1006	8.09322e-05	1:180182531:A:T	27662	27662	31	40	0.416667	2.85149e-05	-0.483643	0.100567	0.00309969	0.0036168	0.0615704	8.27e-05	0.0859681	TRUE
ENSG00000230124.8	156	1.02088	10.1316	31.5541	0.0176142	1:180515549:G:GT	12595	12595	9	12	0.125	0.0123564	0.40377	0.153052	0.154985	0.157559	0.390854	0.000413433	0.545733	FALSE
ENSG00000143324.14	19	0.993721	6.36723	34.5287	0.0142342	1:180630881:T:G	-1141	-1141	4	8	0.0833333	0.0135791	0.474032	0.182357	0.0874913	0.0887692	0.314935	0.000560468	0.43973	FALSE
ENSG00000243155.1	171	1.00034	58.087	32.6607	0.00202871	1:180948652:C:T	-27830	-27830	13	15	0.15625	0.00139254	0.780426	0.224775	0.108889	0.111172	0.345659	6.3938e-05	0.482629	FALSE
ENSG00000135823.14	161	1.02812	43.5594	31.2099	0.0421683	1:181043661:C:T	20540	20540	6	8	0.0833333	0.0312763	0.507568	0.226214	0.841216	0.840113	0.679053	0.000100344	0.948132	FALSE
ENSG00000153029.16	157	1.03781	42.4947	31.465	0.0164913	1:181051181:C:T	17807	17807	15	20	0.208333	0.011375	-0.235872	0.088282	0.49635	0.48877	0.572322	0.00010866	0.799109	FALSE
ENSG00000162783.11	114	1.03187	31.1763	31.4557	0.00523684	1:181053254:C:T	-35446	-35446	26	35	0.364583	0.0032034	-0.413512	0.130645	0.142686	0.140467	0.378294	0.000143203	0.528195	FALSE
ENSG00000237292.1	35	1.0187	19.518	35.4451	0.07398	1:181139099:C:T	-35385	-35385	3	6	0.0625	0.0758444	0.483189	0.2641	0.770423	0.771073	0.66005	0.000212041	0.9216	FALSE
ENSG00000198216.14	1	0.997304	1.01002	35.9899	0.383404	1:181271211:C:T	-46479	-46479	10	18	0.8125	0.390119	0.088588	0.101802	0.381662	0.387379	0.531332	0.00360793	0.741876	FALSE
ENSG00000231684.3	54	0.98876	14.9946	32.4833	0.0577868	1:182380813:G:A	44812	44812	4	7	0.0729167	0.0487789	0.440398	0.215705	0.593941	0.595352	0.608743	0.000230874	0.849961	FALSE
ENSG00000135821.19	103	1.00504	25.7602	31.5319	0.02588	1:182408048:C:T	15842	15842	4	6	0.0625	0.018816	-0.444909	0.180595	0.489751	0.488664	0.572309	0.00014828	0.79909	FALSE
ENSG00000135828.11	71	1.01082	24.2655	32.91	0.107751	1:182612022:T:G	22766	22766	4	6	0.0625	0.0970312	-0.205183	0.120333	0.934307	0.935874	0.701501	0.000162893	0.979476	FALSE
ENSG00000143333.7	66	0.998787	23.5822	33.1292	0.144652	1:182613672:C:G	9283	9283	5	7	0.0729167	0.133639	0.486119	0.316576	0.973503	0.974956	0.710873	0.000156018	0.992562	FALSE
ENSG00000261504.1	64	1.02948	21.9017	32.4407	0.0263343	1:182571744:T:TTTTG	-43510	-43510	13	17	0.177083	0.0209722	-0.481082	0.198998	0.438356	0.428488	0.5477	0.000201049	0.76473	FALSE
ENSG00000135838.14	165	1.03164	31.1745	30.4136	0.0605924	1:182796169:C:CAA	6873	6873	8	10	0.104167	0.0438915	-0.384276	0.18381	0.850315	0.850325	0.682155	0.000143025	0.952464	FALSE
ENSG00000135829.17	150	1.00436	22.4617	30.0973	0.0778214	1:182831302:G:A	-8045	-8045	4	6	0.0625	0.0569262	-0.321042	0.163059	0.833917	0.836859	0.678107	0.000169363	0.946812	FALSE
ENSG00000287808.1	151	1.03862	22.0494	29.3149	0.0191097	1:182814887:T:C	-24674	-24674	25	35	0.635417	0.0103461	-0.472569	0.174372	0.335166	0.32856	0.505431	0.000210271	0.705712	FALSE
ENSG00000135862.6	74	0.941695	5.41493	35.0771	0.13118	1:182989666:T:C	-33754	-33754	5	9	0.09375	0.131611	-0.357254	0.2314	0.546745	0.55922	0.598297	0.000474115	0.835376	FALSE
ENSG00000116698.22	59	1.00351	21.5721	32.8215	0.000477794	1:183476745:TTTG:T	4529	4529	3	5	0.0520833	0.00030783	-0.943285	0.235534	0.00829917	0.0100786	0.110116	0.000175454	0.153751	FALSE
ENSG00000232860.10	59	1.02017	20.5084	32.043	0.0102638	1:183494652:G:A	21756	21756	14	17	0.822917	0.00726668	0.705623	0.247526	0.186081	0.183107	0.413507	0.000203533	0.577363	FALSE
ENSG00000116701.16	241	1.02024	46.3745	30.9552	0.00177054	1:183554378:G:A	-36527	-36527	9	11	0.114583	0.000877104	-0.43426	0.11937	0.0725927	0.0743389	0.293788	9.00753e-05	0.410204	FALSE
ENSG00000162704.16	212	0.994457	26.6295	31.1091	0.00175153	1:183586238:C:G	-49545	-49545	20	28	0.291667	0.000892987	0.331291	0.091226	0.0477952	0.0464985	0.240895	0.000134591	0.336351	FALSE
ENSG00000143344.16	212	0.990372	27.4047	31.2503	0.0102515	1:183625297:A:G	-10788	-10788	5	7	0.0729167	0.0065446	-0.709172	0.245242	0.250375	0.250178	0.460078	0.000127565	0.642388	FALSE
ENSG00000198756.12	77	1.01395	11.8075	33.1011	0.0526747	1:184054395:A:C	16666	16666	26	32	0.333333	0.0462408	-0.344415	0.166664	0.468453	0.46555	0.56363	0.000340841	0.786973	FALSE
ENSG00000198860.14	60	1.03408	11.5697	32.5494	0.0258947	1:184039104:T:TA	-12547	-12547	7	13	0.135417	0.0208133	-0.276258	0.11412	0.249975	0.247368	0.459265	0.000390338	0.641252	FALSE
ENSG00000116667.15	30	1.00581	7.62886	35.3018	0.130491	1:184367852:A:G	-19177	-19177	3	6	0.0625	0.13217	-0.414737	0.269034	0.656434	0.653573	0.626243	0.000502772	0.874396	FALSE
ENSG00000116406.20	135	1.00971	29.297	30.6791	0.106114	1:184786047:G:T	31140	31140	11	17	0.177083	0.0840454	-0.200962	0.113009	0.961104	0.9619	0.707493	0.000134044	0.987843	FALSE
ENSG00000135842.17	147	1.0075	31.9668	30.0078	0.00773697	1:184925505:C:T	-49003	-49003	33	45	0.46875	0.00398044	0.331102	0.10739	0.219978	0.216806	0.440808	0.000121255	0.615482	FALSE
ENSG00000121481.11	20	1.00123	10.5061	34.2726	0.0478169	1:185065956:A:AT	20430	20430	4	5	0.0520833	0.0454806	-0.527092	0.254118	0.40286	0.401784	0.536126	0.000355335	0.74857	FALSE
ENSG00000121486.12	63	1.00882	27.4212	32.7071	0.0431532	1:185174589:A:G	17517	17517	21	34	0.354167	0.0363545	0.19054	0.0875454	0.69893	0.698346	0.638994	0.00014246	0.8922	FALSE
ENSG00000116668.13	63	1.01237	28.4905	33.0583	0.00916379	1:185124135:C:CATCTTT	-32945	-32945	8	10	0.104167	0.00730903	-0.644504	0.226267	0.230977	0.225582	0.444933	0.000140015	0.621241	FALSE
ENSG00000279838.1	51	0.993974	24.4939	33.6411	0.0196633	1:185250955:A:G	-43417	-43417	3	6	0.0625	0.017311	-0.797012	0.318976	0.389161	0.388096	0.531472	0.000145898	0.742072	FALSE
ENSG00000116679.16	46	1.03839	22.9229	32.0584	0.00487729	1:185359526:T:C	42253	42253	11	15	0.15625	0.00324805	0.373089	0.118068	0.0931907	0.0958412	0.324924	0.000202006	0.453678	FALSE
ENSG00000273004.1	46	1.00703	25.3552	33.4375	0.16575	1:185366400:T:C	48621	48621	4	5	0.0520833	0.156052	-0.487796	0.336487	0.989301	0.98974	0.71442	0.00015244	0.997514	FALSE
ENSG00000116690.13	90	0.985916	21.5728	33.3544	0.00727051	1:186315635:A:T	19356	19356	18	22	0.229167	0.00594929	0.621047	0.212043	0.153285	0.15042	0.385603	0.000157677	0.538402	FALSE
ENSG00000047410.14	62	1.02285	24.329	32.6287	0.0662545	1:186389145:CT:C	13452	13452	4	7	0.0729167	0.0570085	-0.475644	0.241666	0.805219	0.804968	0.669754	0.000174262	0.935149	FALSE
ENSG00000157181.16	62	1.00859	25.165	33.147	0.0326303	1:186400270:A:G	24432	24432	3	6	0.0625	0.0280648	0.503841	0.219871	0.563044	0.562137	0.599478	0.000155018	0.837025	FALSE
ENSG00000229739.4	46	1.0247	18.3787	33.6296	0.0105795	1:186388162:T:G	-35319	-35319	4	7	0.0729167	0.00909129	-0.674829	0.24433	0.169483	0.168634	0.399885	0.000233104	0.558342	FALSE
ENSG00000288562.1	31	1.01206	10.4232	33.7288	0.221227	1:186654338:A:G	29638	29638	7	9	0.09375	0.212601	0.341018	0.2686	0.922808	0.924655	0.699117	0.000381833	0.976147	FALSE
ENSG00000273129.3	68	1.00199	13.8542	32.3706	0.0443345	1:186664622:G:A	-15979	-15979	4	7	0.0729167	0.0364215	0.515841	0.237098	0.468653	0.465523	0.56363	0.000270705	0.786973	FALSE
ENSG00000073756.13	68	1.02135	13.9635	32.1441	0.0348571	1:186664622:G:A	-16300	-16300	4	7	0.0729167	0.0275853	0.452054	0.196623	0.384662	0.380557	0.528288	0.000300891	0.737626	FALSE
ENSG00000116711.10	24	1.00376	7.29606	34.9212	0.0619631	1:186843995:G:A	15046	15046	3	5	0.0520833	0.0616652	0.37981	0.196731	0.379962	0.371178	0.524688	0.00051936	0.7326	FALSE
ENSG00000150681.10	90	0.984325	18.9529	31.4738	0.0257547	1:192163874:T:A	5412	5412	26	36	0.375	0.0186053	-0.232348	0.094132	0.39676	0.39773	0.534851	0.000177723	0.74679	FALSE
ENSG00000090104.12	40	1.00424	11.9199	34.7893	0.0661387	1:192567350:A:AT	-8413	-8413	3	6	0.0625	0.065312	-0.474326	0.249271	0.555444	0.555732	0.596697	0.000318867	0.833142	FALSE
ENSG00000231767.5	15	0.98325	3.01635	36.4025	0.372458	1:192698381:G:A	-17802	-17802	3	6	0.0625	0.381961	0.203181	0.229468	0.755724	0.759573	0.657787	0.0011112	0.91844	FALSE
ENSG00000116741.8	37	0.980502	9.18678	35.2201	0.0449838	1:192810097:T:A	1058	1058	19	26	0.270833	0.0456684	-0.32137	0.15508	0.352265	0.353974	0.51591	0.000358208	0.720343	FALSE
ENSG00000285280.2	46	1.0081	13.9121	33.4821	0.180844	1:192933285:T:C	-24428	-24428	3	6	0.0625	0.171125	-0.38076	0.272501	0.934907	0.936761	0.701734	0.000279541	0.979801	FALSE
ENSG00000116747.13	48	1.03613	21.8424	32.605	0.0579308	1:193071970:A:G	12516	12516	3	6	0.0625	0.049339	-0.330897	0.162497	0.718328	0.715535	0.644724	0.000209319	0.9002	FALSE
ENSG00000116750.14	49	1.01435	21.7219	32.8038	0.106019	1:193108518:T:C	48438	48438	8	14	0.145833	0.0948457	-0.184047	0.107201	0.908909	0.91017	0.69584	0.000185771	0.971572	FALSE
ENSG00000023572.10	42	1.01685	22.7593	33.9318	0.103667	1:193074666:T:A	-31448	-31448	7	10	0.104167	0.0983075	0.35508	0.209068	0.911509	0.914715	0.696686	0.000179913	0.972753	FALSE
ENSG00000134371.14	36	1.02238	20.7404	34.0383	0.027235	1:193136973:TG:T	14990	14990	3	6	0.0625	0.0251198	-0.285909	0.122189	0.438356	0.425256	0.546175	0.000203842	0.762601	FALSE
ENSG00000162630.6	45	1.02223	16.7946	33.1498	0.0663314	1:193151537:T:C	-35076	-35076	4	7	0.0729167	0.0590971	0.404198	0.207174	0.678532	0.675595	0.63264	0.000251479	0.883328	FALSE
ENSG00000286285.1	51	1.03252	18.467	34.3647	0.0274191	1:193464486:G:A	7064	7064	3	6	0.0625	0.0260087	0.546762	0.235188	0.393961	0.386083	0.530864	0.000242553	0.741223	FALSE
ENSG00000066279.19	64	1.0195	16.6318	32.8172	0.00717849	1:197150888:TA:T	4194	4194	3	6	0.0625	0.00547431	0.743597	0.251121	0.107989	0.107439	0.340084	0.000249968	0.474845	FALSE
ENSG00000177888.8	15	1.00118	9.35124	33.9503	0.0077087	1:197179631:T:C	-21662	-21662	5	10	0.104167	0.00680916	0.37423	0.130111	0.0717928	0.0695608	0.284931	0.000399088	0.397838	FALSE
ENSG00000213047.13	8	1.0027	8.23819	36.3082	0.0816388	1:197732246:G:C	-43450	-43450	3	6	0.0625	0.0874208	-0.519511	0.295444	0.50355	0.50296	0.576573	0.000457107	0.805044	FALSE
ENSG00000151414.15	107	1.01724	28.3158	30.8584	0.0112997	1:198159051:G:C	2057	2057	9	14	0.145833	0.00692391	0.208993	0.0728281	0.270673	0.267526	0.46852	0.00014495	0.654175	FALSE
ENSG00000081237.21	17	0.980213	5.09656	35.3072	0.228237	1:198678752:C:CT	40295	40295	5	5	0.0520833	0.2303	0.171799	0.140719	0.729527	0.739435	0.652295	0.000644966	0.910772	FALSE
ENSG00000229989.6	63	1.00568	13.6117	32.6383	0.0118268	1:198930867:G:A	-6604	-6604	4	7	0.0729167	0.00910519	0.563766	0.204163	0.151785	0.147611	0.383198	0.000281645	0.535043	FALSE
ENSG00000203721.8	181	1.00992	39.0157	31.0244	0.00827502	1:200364476:TA:T	-36229	-36229	20	31	0.677083	0.00499666	-0.323844	0.108081	0.279972	0.27247	0.471861	0.000100785	0.658839	FALSE
ENSG00000162702.8	142	1.02189	33.2098	30.9479	0.0034713	1:200373697:C:A	-36359	-36359	18	28	0.708333	0.00186531	-0.280741	0.0834144	0.10199	0.103023	0.33479	0.000126975	0.467453	FALSE
ENSG00000260088.1	199	1.03306	34.125	31.0863	0.00468042	1:200642582:C:T	-26925	-26925	17	25	0.739583	0.0026677	0.472672	0.146177	0.136486	0.137146	0.374974	0.000131721	0.52356	FALSE
ENSG00000118197.14	199	1.05137	33.9549	30.9224	0.00522545	1:200651388:C:T	-18519	-18519	9	11	0.114583	0.00293972	0.633646	0.198179	0.141386	0.145589	0.382	0.000146585	0.53337	FALSE
ENSG00000118200.15	50	0.951501	7.18503	34.2377	0.0212715	1:200726288:G:T	-12605	-12605	4	7	0.0729167	0.0198593	0.591994	0.242549	0.167383	0.159685	0.392803	0.000380826	0.548454	FALSE
ENSG00000170128.5	42	0.966626	10.7367	33.6272	0.119098	1:200874177:G:T	1196	1196	19	20	0.208333	0.111717	0.463189	0.283875	0.743026	0.754852	0.656778	0.000280813	0.917031	FALSE
ENSG00000116852.15	136	1.01276	48.9703	32.8874	0.0139869	1:200976782:G:A	-46932	-46932	8	8	0.0833333	0.0111983	-0.827553	0.309003	0.49615	0.492198	0.573427	8.16562e-05	0.800651	FALSE
ENSG00000229191.1	136	1.04286	48.0613	32.2884	0.0228668	1:200985831:C:CTTCCT	-38118	-38118	9	9	0.09375	0.0177552	1.02024	0.410061	0.656434	0.65373	0.626243	9.88312e-05	0.874396	FALSE
ENSG00000116857.17	42	1.02584	20.1738	34.0519	0.0195307	1:201135213:T:TA	-36361	-36361	28	37	0.385417	0.0178848	0.457735	0.184202	0.318168	0.31635	0.498808	0.000213769	0.696465	FALSE
ENSG00000174307.7	109	1.01701	37.3009	32.4177	0.0179495	1:201470345:A:G	1108	1108	15	21	0.21875	0.0138748	0.433189	0.167215	0.486851	0.483006	0.570914	0.000109896	0.797143	FALSE
ENSG00000224536.2	186	1.03311	59.0143	32.3583	0.00539772	1:201524843:A:G	17602	17602	5	8	0.0833333	0.00378817	-0.786919	0.253687	0.265673	0.258907	0.464833	7.62068e-05	0.649026	FALSE
ENSG00000159176.14	185	1.02465	59.8275	32.568	0.00744768	1:201529677:G:C	20221	20221	3	6	0.0625	0.00550821	-0.497217	0.168051	0.356464	0.348881	0.513919	7.16266e-05	0.717564	FALSE
ENSG00000134369.16	147	1.0345	45.9424	32.7034	0.00997408	1:201515331:A:G	-23796	-23796	11	14	0.145833	0.00765365	0.6351	0.224395	0.361964	0.352669	0.515128	9.86534e-05	0.719251	FALSE
ENSG00000198700.10	131	1.04493	31.8373	31.7413	0.00829611	1:201868307:C:CT	39158	39158	21	25	0.260417	0.00553781	-0.361918	0.122408	0.216378	0.214715	0.439308	0.00015088	0.613388	FALSE
ENSG00000198892.7	133	1.03955	33.6268	31.9664	0.00062874	1:201866103:G:A	-22577	-22577	4	5	0.0520833	0.000343856	-1.05753	0.266611	0.0152985	0.0176672	0.147007	0.000138643	0.205259	FALSE
ENSG00000134375.11	182	1.02688	45.2788	31.0259	0.0354848	1:201981821:T:C	26318	26318	5	6	0.0625	0.02539	-0.749191	0.320818	0.79832	0.797474	0.667464	9.58529e-05	0.931952	FALSE
ENSG00000176393.11	210	1.0277	55.2253	31.9387	0.000353879	1:201981078:T:C	-1294	-1294	20	29	0.697917	0.000182532	0.547836	0.130924	0.0142986	0.0171538	0.145598	7.89637e-05	0.203292	FALSE
ENSG00000163435.16	193	1.00905	53.6865	32.3568	0.0128805	1:201986246:GTTTTTTAT:G	-21699	-21699	9	15	0.15625	0.00964992	0.543526	0.198504	0.49775	0.497089	0.574808	7.28711e-05	0.80258	FALSE
ENSG00000143862.8	130	1.01798	45	33.9232	0.0177449	1:202156003:A:G	11260	11260	12	14	0.145833	0.0160063	-0.294977	0.116527	0.548145	0.544886	0.592885	9.16149e-05	0.82782	FALSE
ENSG00000143851.16	136	1.01322	45.2776	33.2609	0.0263687	1:202210428:G:GAA	48840	48840	3	6	0.0625	0.0226732	0.535089	0.224437	0.69733	0.696743	0.638289	8.85537e-05	0.891216	FALSE
ENSG00000243323.7	149	1.01495	50.8203	34.0136	0.0210633	1:202196497:T:C	28446	28446	3	6	0.0625	0.0192561	0.717829	0.292538	0.657734	0.654908	0.626588	7.97019e-05	0.874879	FALSE
ENSG00000133067.18	144	1.03001	45.8499	33.3938	0.00114828	1:202234630:G:A	40831	40831	6	9	0.09375	0.000869042	0.827799	0.227341	0.0462954	0.0463683	0.240444	9.63668e-05	0.335722	FALSE
ENSG00000077152.12	82	1.01965	23.9821	31.7115	0.0261223	1:202353348:T:C	11364	11364	3	6	0.0625	0.0193569	0.605152	0.246841	0.461054	0.460537	0.56142	0.000173543	0.783887	FALSE
ENSG00000077157.23	76	1.00952	24.1201	32.0115	0.00774013	1:202333862:T:A	-14837	-14837	7	12	0.125	0.00532703	-0.431378	0.145165	0.167283	0.167474	0.39908	0.000162624	0.557218	FALSE
ENSG00000236439.4	59	1.0368	21.6338	32.369	0.170379	1:202422291:G:A	-49826	-49826	3	5	0.0520833	0.153741	-0.311249	0.213469	0.979802	0.981034	0.712344	0.000212132	0.994615	FALSE
ENSG00000226862.1	102	1.03371	31.9114	31.617	0.0240493	1:202569970:C:G	-34298	-34298	6	11	0.114583	0.017512	0.470071	0.188495	0.529747	0.52447	0.586058	0.000141372	0.818288	FALSE
ENSG00000117139.18	140	1.01401	28.875	33.349	0.0645577	1:202765239:TAC:T	-43248	-43248	4	8	0.0833333	0.0582021	-0.397704	0.203086	0.850915	0.851195	0.682657	0.000139487	0.953164	FALSE
ENSG00000183155.5	113	0.999822	32.0428	32.104	0.0489314	1:202883459:G:A	-5690	-5690	20	29	0.302083	0.0396478	-0.319008	0.149265	0.79942	0.799675	0.668257	0.000115543	0.933059	FALSE
ENSG00000117153.16	148	1.03438	44.8453	32.1645	0.0045192	1:202962870:C:A	34234	34234	21	31	0.322917	0.00303881	0.280532	0.0880809	0.171183	0.171207	0.402641	0.000100997	0.562191	FALSE
ENSG00000159346.13	138	1.00688	31.9102	32.5451	0.0294508	1:202911456:ATCTC:A	-47116	-47116	4	5	0.0520833	0.0238692	0.546779	0.23149	0.615038	0.611769	0.614492	0.000121023	0.857989	FALSE
ENSG00000159348.13	146	0.99713	29.8634	31.8685	0.0036002	1:202954952:A:G	-12323	-12323	10	17	0.177083	0.00226572	0.345947	0.10502	0.106389	0.102894	0.334758	0.000121977	0.467408	FALSE
ENSG00000163444.12	156	1.02483	28.8864	30.2561	0.0186609	1:203022617:C:T	15243	15243	13	20	0.208333	0.0113182	-0.349416	0.13068	0.409959	0.407705	0.538666	0.000148463	0.752116	FALSE
ENSG00000143847.16	206	1.02725	33.4066	29.5761	2.55359e-05	1:203067629:T:C	41138	41138	28	43	0.447917	4.52921e-06	0.665672	0.122877	0.00019998	0.000695441	0.019802	0.000130177	0.0276487	TRUE
ENSG00000133055.10	130	1.02468	40.1131	31.3676	0.00308219	1:203174251:T:C	-1575	-1575	4	5	0.0520833	0.00175639	1.34166	0.396049	0.109889	0.109394	0.342458	0.000106835	0.478159	FALSE
ENSG00000133048.13	140	1.02167	41.4161	31.4127	0.00637245	1:203183192:G:A	-3512	-3512	7	10	0.895833	0.00395372	0.721007	0.233659	0.227677	0.223646	0.443995	0.000101694	0.619932	FALSE
ENSG00000231507.4	126	1.00566	40.2497	32.6965	0.00307225	1:203225058:C:T	-48163	-48163	16	21	0.21875	0.00218086	0.597009	0.180464	0.116588	0.114828	0.350535	9.52575e-05	0.489437	FALSE
ENSG00000133063.16	126	1.04412	41.2573	32.3154	0.0652311	1:203290119:T:A	16478	16478	4	8	0.0833333	0.0548763	-0.507858	0.255682	0.931607	0.933003	0.700665	0.00011593	0.978309	FALSE
ENSG00000233791.7	102	1.01922	31.1648	31.6829	9.01275e-05	1:203300163:T:G	-5152	-5152	3	6	0.0625	3.81228e-05	1.18584	0.251642	0.00169983	0.00248572	0.048151	0.000133228	0.0672312	TRUE
ENSG00000159388.6	102	1.01763	32.3383	32.0154	0.000633136	1:203276408:C:T	-29083	-29083	19	29	0.302083	0.000350179	0.501766	0.1267	0.0172983	0.0187906	0.153028	0.000127214	0.213666	FALSE
ENSG00000058668.16	180	1.03607	37.4909	31.8774	0.0188334	1:203637362:G:C	10530	10530	12	18	0.1875	0.0137833	0.523806	0.201982	0.49825	0.492667	0.573427	0.000121956	0.800651	FALSE
ENSG00000122188.13	264	1.03478	67.3992	31.0771	0.015133	1:203775329:G:A	10152	10152	28	34	0.354167	0.00987348	-0.424744	0.155646	0.633237	0.627491	0.618482	6.73623e-05	0.86356	FALSE
ENSG00000182004.13	142	1.02361	43.2164	33.0609	0.045173	1:203866603:T:A	5004	5004	3	6	0.0625	0.0392269	0.473886	0.221231	0.860114	0.859161	0.684886	9.85568e-05	0.956277	FALSE
ENSG00000143842.15	25	1.01424	22.1121	35.896	0.0178123	1:204066680:CT:C	-6436	-6436	5	9	0.09375	0.0193186	0.543475	0.221608	0.324868	0.321325	0.502452	0.000182376	0.701552	FALSE
ENSG00000143845.15	14	1.0259	11.399	35.3635	0.208419	1:204124361:A:T	-27683	-27683	3	5	0.0520833	0.210807	-0.545235	0.42773	0.926207	0.927186	0.699605	0.000378242	0.976829	FALSE
ENSG00000158615.10	145	1.00598	44.6874	32.4601	0.000763638	1:204402594:T:G	-9293	-9293	7	8	0.0833333	0.000470982	0.5444	0.141141	0.030297	0.0328074	0.202582	8.59626e-05	0.282857	FALSE
ENSG00000133056.14	122	1.02687	47.0606	32.5508	0.00958034	1:204452016:C:T	-42789	-42789	14	18	0.1875	0.0071939	0.353499	0.123832	0.357264	0.351523	0.514686	9.22196e-05	0.718634	FALSE
ENSG00000198625.14	123	1.02295	38.9014	31.7786	7.23477e-06	1:204551081:C:T	34702	34702	30	43	0.552083	2.45534e-06	-0.493395	0.0878091	9.999e-05	0.000231046	0.00948756	0.000109069	0.0132471	TRUE
ENSG00000240710.1	229	1.00666	55.1723	31.61	0.0131826	1:204629047:G:C	26012	26012	7	7	0.0729167	0.0090463	1.02641	0.371356	0.518048	0.51596	0.581832	6.99102e-05	0.812388	FALSE
ENSG00000240219.1	173	0.995532	44.4198	31.4577	0.00602062	1:204581588:T:C	-45187	-45187	7	8	0.0833333	0.0037381	-0.834336	0.268537	0.245275	0.237173	0.45245	8.12148e-05	0.631737	FALSE
ENSG00000174529.7	79	1.00998	32.1994	32.9474	0.0948088	1:205085130:C:G	670	670	3	5	0.0520833	0.0849661	0.501292	0.282769	0.958204	0.958747	0.707056	0.000122159	0.987232	FALSE
ENSG00000117222.14	138	1.00715	41.7574	32.2747	0.0949162	1:205085751:A:C	-36264	-36264	7	10	0.104167	0.0818351	0.577855	0.322522	0.984502	0.98422	0.71332	9.26359e-05	0.995979	FALSE
ENSG00000133059.17	83	1.02725	27.4485	32.7034	0.0618337	1:205228311:G:A	16609	16609	4	6	0.0625	0.0532476	0.528457	0.264158	0.821618	0.819405	0.67328	0.000158418	0.940073	FALSE
ENSG00000133069.17	101	1.05672	31.1017	31.697	0.0247245	1:205182165:C:T	-45781	-45781	9	14	0.145833	0.0182002	0.368463	0.148717	0.529147	0.514745	0.581119	0.000164754	0.811392	FALSE
ENSG00000163545.11	148	1.01998	53.3041	32.5286	7.29641e-05	1:205308653:C:T	-13092	-13092	7	7	0.0729167	3.84732e-05	-1.06097	0.22529	0.00339966	0.00344548	0.0600066	7.82499e-05	0.0837846	TRUE
ENSG00000235363.1	105	0.987994	33.3882	32.3427	0.0798069	1:205336974:C:T	-14273	-14273	10	13	0.135417	0.0682409	0.412236	0.219098	0.938906	0.939136	0.702125	0.000103184	0.980348	FALSE
ENSG00000162873.15	84	1.00607	25.6998	31.8054	0.0225955	1:205307119:T:G	-49971	-49971	12	16	0.166667	0.0166807	-0.401487	0.159688	0.442856	0.441272	0.552011	0.000149542	0.77075	FALSE
ENSG00000117266.16	136	1.04105	24.0911	31.0095	0.00420338	1:205532857:T:G	28261	28261	20	25	0.260417	0.00233595	0.573619	0.174734	0.0838916	0.0862747	0.310626	0.000195096	0.433715	FALSE
ENSG00000174514.13	194	1.05231	49.3547	30.8769	0.00267975	1:205584957:G:C	16072	16072	32	47	0.489583	0.00137707	-0.489268	0.140753	0.109089	0.108928	0.341518	0.000101394	0.476848	FALSE
ENSG00000158711.14	198	1.0206	66.6843	31.9159	0.00898928	1:205625294:TA:T	-6717	-6717	21	33	0.65625	0.00618838	0.187344	0.0643009	0.449255	0.442377	0.552578	6.27773e-05	0.771542	FALSE
ENSG00000158715.6	141	1.02253	52.9575	32.245	0.0737578	1:205712549:G:A	32040	32040	21	27	0.28125	0.0623128	0.290965	0.151106	0.981302	0.981861	0.712607	7.99332e-05	0.994982	FALSE
ENSG00000069275.13	161	1.03841	54.6473	32.11	0.00464613	1:205790085:G:A	39903	39903	8	9	0.09375	0.00310557	-0.640891	0.201742	0.212879	0.20921	0.435281	8.47905e-05	0.607764	FALSE
ENSG00000117280.13	146	1.01177	48.0057	32.8312	0.000245566	1:205770138:C:T	-5344	-5344	35	45	0.46875	0.000152024	0.537289	0.126518	0.00929907	0.0110691	0.11626	8.28128e-05	0.162329	FALSE
ENSG00000286619.1	129	1.04109	34.5221	31.019	1.06108e-10	1:205790067:G:A	-23255	-23255	18	19	0.197917	6.62774e-12	1.51993	0.150573	9.999e-05	1.62066e-09	1.12747e-06	0.000136216	1.57423e-06	TRUE
ENSG00000133065.11	127	1.03417	34.9161	31.3483	0.000947455	1:205838376:C:T	24628	24628	18	29	0.302083	0.000472756	-0.36051	0.0934975	0.0272973	0.028556	0.188733	0.000129549	0.263519	FALSE
ENSG00000162877.13	51	1.01663	13.1211	32.9887	0.291883	1:205832744:A:G	-17388	-17388	11	16	0.166667	0.277423	-0.327943	0.297237	0.988001	0.988823	0.71442	0.000311567	0.997514	FALSE
ENSG00000276600.5	33	0.997145	10.4458	32.7579	0.0433531	1:206048252:T:C	44791	44791	6	9	0.09375	0.0366811	0.591851	0.272436	0.375962	0.371938	0.524832	0.000348742	0.7328	FALSE
ENSG00000196188.12	57	1.02705	20.4752	32.3999	0.0481481	1:206055734:G:A	31825	31825	12	16	0.166667	0.0398806	-0.527977	0.247352	0.625637	0.624554	0.618053	0.000212087	0.862961	FALSE
ENSG00000285417.1	59	1.02259	20.3829	32.2091	0.0103777	1:206073790:A:G	38537	38537	3	5	0.0520833	0.00750995	-0.787683	0.277574	0.179582	0.183049	0.41346	0.000207666	0.577297	FALSE
ENSG00000263961.8	81	1.03352	25.4572	31.4417	0.00437911	1:206005999:G:T	-47174	-47174	8	13	0.864583	0.00262306	-0.736981	0.227475	0.0942906	0.0967773	0.326303	0.000176997	0.455604	FALSE
ENSG00000266028.8	9	0.958709	3.91271	37.0808	0.250266	1:206249564:T:G	46218	46218	5	7	0.0729167	0.264194	0.228169	0.201075	0.679232	0.690896	0.636858	0.000734449	0.889218	FALSE
ENSG00000196550.11	9	0.956833	3.88071	36.8699	0.128934	1:206214582:T:C	10168	10168	3	6	0.0625	0.139198	-0.416724	0.275386	0.426457	0.434621	0.5493	0.000731671	0.766964	FALSE
ENSG00000263528.8	184	1.03637	64.0783	32.0682	0.00475478	1:206491074:T:G	20598	20598	16	19	0.802083	0.00316431	-0.619153	0.195331	0.251775	0.247488	0.459265	7.14906e-05	0.641252	FALSE
ENSG00000261000.1	151	1.01747	53.1778	32.4438	0.000524971	1:206503837:C:T	-111	-111	34	46	0.520833	0.000313766	0.800834	0.200295	0.0230977	0.0256775	0.180477	7.7299e-05	0.251993	FALSE
ENSG00000266094.8	158	1.02902	51.3021	31.7311	0.0106549	1:206496132:C:T	-11399	-11399	8	8	0.0833333	0.00727297	0.626116	0.219662	0.409359	0.408765	0.539035	8.56439e-05	0.752631	FALSE
ENSG00000143486.16	201	1.04031	51.4006	30.4329	0.00254972	1:206578115:AC:A	-34350	-34350	11	14	0.145833	0.00119841	-0.514485	0.145903	0.107889	0.111236	0.345736	9.11084e-05	0.482737	FALSE
ENSG00000143479.18	129	1.03256	35.9526	31.4247	0.0255199	1:206658649:C:T	23113	23113	4	6	0.0625	0.0183261	-0.851058	0.343903	0.59804	0.590891	0.607384	0.000124675	0.848064	FALSE
ENSG00000162889.11	102	1.04119	40.3922	32.2058	0.0114302	1:206703992:C:T	19087	19087	10	15	0.15625	0.00833212	-0.214493	0.0766961	0.359064	0.351954	0.51504	0.000116496	0.719128	FALSE
ENSG00000224114.1	103	1.05372	43.8931	31.9723	0.0130507	1:206742073:A:G	45804	45804	18	25	0.260417	0.00934985	0.594034	0.215953	0.424358	0.412476	0.540028	0.000114883	0.754018	FALSE
ENSG00000136634.7	54	1.02211	26.0043	33.5457	0.000131394	1:206751682:C:T	-22859	-22859	5	8	0.0833333	9.34472e-05	0.762453	0.172826	0.00269973	0.00298144	0.0552302	0.000162347	0.0771156	TRUE
ENSG00000162894.12	94	1.01673	21.0673	31.4973	0.00772893	1:206903678:C:G	-19569	-19569	6	8	0.0833333	0.0049529	-0.415507	0.138517	0.144286	0.145208	0.382	0.000194219	0.53337	FALSE
ENSG00000182795.13	48	0.996777	15.8649	32.4387	0.00413306	1:207017118:T:C	-15638	-15638	11	12	0.125	0.00287744	1.03306	0.322293	0.0631937	0.0642391	0.276351	0.000229113	0.385857	FALSE
ENSG00000123836.15	54	0.99559	17.1351	31.4752	0.0350318	1:207079820:A:G	45454	45454	25	32	0.666667	0.0261048	-0.40293	0.173439	0.463454	0.459336	0.56104	0.000210612	0.783356	FALSE
ENSG00000180667.11	74	1.02129	24.4506	31.7473	0.0446293	1:207053793:A:T	813	813	3	6	0.0625	0.0348565	0.530289	0.241546	0.669433	0.664026	0.628805	0.000171843	0.877973	FALSE
ENSG00000123843.13	109	1.01313	33.5314	32.1354	0.000340648	1:207112360:T:G	23500	23500	4	7	0.0729167	0.000183433	-0.994521	0.237769	0.00869913	0.0106533	0.113457	0.000119503	0.158415	FALSE
ENSG00000123838.11	100	1.01357	30.7236	32.0599	0.00010812	1:207108361:A:AG	4128	4128	9	15	0.15625	5.17052e-05	0.774987	0.168088	0.00219978	0.00305229	0.0560762	0.000130759	0.0782968	TRUE
ENSG00000196352.18	108	1.0189	33.0233	32.03	3.44603e-08	1:207337203:A:G	15684	15684	28	37	0.614583	7.89221e-09	0.764425	0.101446	9.999e-05	8.71747e-07	0.000133124	0.0001255	0.000185876	TRUE
ENSG00000117322.19	107	1.02959	23.8659	31.3121	0.00168919	1:207480019:A:G	26995	26995	4	5	0.0520833	0.000892022	0.749409	0.206339	0.029797	0.0355163	0.210662	0.00018463	0.294138	FALSE
ENSG00000203710.12	143	1.04999	36.4178	30.9553	0.0455788	1:207501007:T:TA	4860	4860	8	9	0.09375	0.0333502	-0.424091	0.191448	0.806019	0.80331	0.669475	0.000135649	0.93476	FALSE
ENSG00000197721.17	263	1.03074	62.5741	32.0166	0.00218122	1:207605257:C:CA	-39856	-39856	16	23	0.239583	0.0013457	0.520163	0.149283	0.117988	0.118452	0.354527	7.0912e-05	0.495011	FALSE
ENSG00000117335.21	222	1.02041	57.3234	31.3069	0.00223024	1:207710947:T:C	-41090	-41090	3	5	0.0520833	0.00121343	-0.505087	0.14342	0.112889	0.114138	0.349872	7.29462e-05	0.488512	FALSE
ENSG00000203709.13	202	1.02102	45.3722	30.1319	0.0106792	1:207833404:A:G	-45711	-45711	13	18	0.1875	0.00587543	0.350128	0.119346	0.383062	0.375514	0.526142	9.24816e-05	0.734629	FALSE
ENSG00000174059.17	107	1.03602	26.1723	30.3818	0.0324299	1:207874607:GA:G	-36795	-36795	5	5	0.0520833	0.0215415	1.25801	0.522847	0.571143	0.561829	0.599478	0.000174608	0.837025	FALSE
ENSG00000076356.7	58	1.00889	18.3877	34.0592	0.0969992	1:208217753:T:C	-26631	-26631	3	5	0.0520833	0.0924384	0.457121	0.264229	0.842516	0.844721	0.680522	0.000212512	0.950184	FALSE
ENSG00000196878.15	27	1.01708	16.2254	34.052	0.0118302	1:209631793:C:T	-20632	-20632	4	5	0.0520833	0.0106963	1.01753	0.377327	0.169283	0.169428	0.400573	0.000252654	0.559303	FALSE
ENSG00000123689.6	23	1.02378	13.9149	34.2846	0.0357963	1:209714373:T:C	38961	38961	4	7	0.0729167	0.0338936	-0.524913	0.237738	0.393061	0.386561	0.531083	0.000306188	0.741528	FALSE
ENSG00000227591.6	112	0.957942	20.5102	32.622	0.0298624	1:209763818:C:T	39693	39693	5	8	0.0833333	0.0243959	0.58428	0.248359	0.478552	0.483546	0.57101	0.000138887	0.797276	FALSE
ENSG00000009790.15	138	1.01686	24.88	30.4245	0.00702977	1:209771456:T:A	15424	15424	20	27	0.28125	0.00380298	-0.466343	0.150411	0.158984	0.155134	0.389175	0.000164593	0.543388	FALSE
ENSG00000162757.4	185	1.00413	31.319	31.4282	0.00803648	1:209762146:C:A	-22413	-22413	12	17	0.177083	0.00512095	-0.653233	0.218703	0.220078	0.22161	0.443001	0.000121305	0.618543	FALSE
ENSG00000117597.18	171	1.01638	28.0125	31.6636	0.0122803	1:209779001:T:C	-48971	-48971	10	11	0.114583	0.00842478	0.423733	0.151752	0.289371	0.285191	0.479845	0.000145786	0.669988	FALSE
ENSG00000234004.4	2	1.0077	0.991568	33.6654	0.0979791	1:211221505:G:A	48017	48017	4	5	0.0520833	0.0914715	-0.488454	0.281468	0.0952905	0.0954668	0.324441	0.00389404	0.453003	FALSE
ENSG00000117625.14	102	1.01997	30.1965	33.1863	0.0204035	1:211304708:C:A	46331	46331	27	43	0.447917	0.0172057	-0.289123	0.115593	0.456254	0.453778	0.558842	0.000138098	0.780288	FALSE
ENSG00000082512.15	148	1.03194	42.6844	31.7927	0.0527472	1:211360010:A:G	33395	33395	6	9	0.09375	0.0419728	0.212764	0.100781	0.89521	0.89556	0.69192	0.000104652	0.966099	FALSE
ENSG00000153363.15	92	1.02822	34.479	32.6182	0.00274413	1:211432355:G:A	49619	49619	33	41	0.427083	0.00190897	-0.616393	0.183607	0.0835916	0.0835316	0.306799	0.000126831	0.428371	FALSE
ENSG00000170385.10	52	1.03721	19.6274	31.3149	0.0518273	1:211579541:C:CTTCCGCG	380	380	9	11	0.114583	0.039637	0.361246	0.169019	0.636736	0.632806	0.620124	0.000234333	0.865853	FALSE
ENSG00000288738.1	55	1.02246	21.6481	32.0744	0.00987669	1:211603033:G:A	-3546	-3546	3	5	0.0520833	0.00699789	-1.09188	0.381044	0.185781	0.184864	0.415019	0.00019539	0.579474	FALSE
ENSG00000117650.13	41	0.940118	5.09524	36.6483	0.139603	1:211690165:A:C	14535	14535	8	9	0.09375	0.148962	0.463093	0.31381	0.549045	0.56196	0.599478	0.000498741	0.837025	FALSE
ENSG00000123684.13	139	1.0122	38.1721	31.6642	0.0268108	1:211812710:G:A	-18053	-18053	13	18	0.1875	0.0198218	0.234969	0.0962388	0.642236	0.640516	0.622204	0.000104406	0.868757	FALSE
ENSG00000143476.18	28	1.00618	5.39432	33.0605	0.236503	1:212013782:C:T	-21771	-21771	3	6	0.0625	0.22303	0.386364	0.31145	0.765323	0.764898	0.658899	0.000712406	0.919992	FALSE
ENSG00000143493.13	28	0.995312	5.53197	34.2166	0.0146558	1:212019262:T:A	-16295	-16295	6	11	0.114583	0.0135508	0.355567	0.136739	0.0822918	0.0794887	0.301374	0.000651304	0.420796	FALSE
ENSG00000220749.4	43	1.01215	4.73341	31.7106	0.0632568	1:212019262:T:A	-32744	-32744	6	11	0.114583	0.0508465	0.391208	0.193453	0.263174	0.260954	0.465527	0.000840506	0.649996	FALSE
ENSG00000226251.8	124	1.013	42.4537	32.4379	5.29088e-07	1:212284975:G:T	-155	-155	24	28	0.291667	1.8631e-07	0.980859	0.151592	9.999e-05	1.94395e-05	0.00146234	9.43208e-05	0.0020418	TRUE
ENSG00000066027.12	124	1.00572	43.7628	32.9739	0.0120544	1:212306347:GAGA:G	20937	20937	3	6	0.0625	0.00966346	0.634255	0.231688	0.412359	0.409047	0.539035	8.76428e-05	0.752631	FALSE
ENSG00000234915.1	191	1.03679	57.3773	31.7894	0.000395812	1:212376015:C:T	44302	44302	14	19	0.197917	0.000199181	0.858519	0.206645	0.0173983	0.0192323	0.155169	8.00259e-05	0.216656	FALSE
ENSG00000065600.13	112	1.02587	32.3816	32.1064	0.0114269	1:212452386:T:C	37485	37485	25	32	0.333333	0.00822819	-0.549764	0.196229	0.30317	0.298919	0.488499	0.000133239	0.68207	FALSE
ENSG00000287445.1	93	1.00987	23.6971	32.189	0.0481598	1:212454286:C:T	21511	21511	5	5	0.0520833	0.0392363	-1.00164	0.467632	0.690931	0.685705	0.635481	0.000165868	0.887296	FALSE
ENSG00000117691.10	93	1.02782	25.0107	32.3721	0.00671222	1:212415551:T:C	-17369	-17369	8	10	0.104167	0.00479819	0.552017	0.183281	0.143586	0.145672	0.382	0.000174416	0.53337	FALSE
ENSG00000260805.3	104	1.0048	9.99877	31.4174	0.0931851	1:212586295:C:T	26564	26564	4	5	0.0520833	0.0761626	-0.607018	0.33216	0.622038	0.62195	0.617647	0.000381373	0.862394	FALSE
ENSG00000162772.17	103	1.00803	9.65004	30.991	0.0875244	1:212588822:C:T	23488	23488	13	14	0.854167	0.0691528	0.287074	0.153104	0.588841	0.583324	0.605828	0.000402762	0.845892	FALSE
ENSG00000237980.2	151	1.01668	27.2107	31.2292	0.0680106	1:212704425:G:C	38787	38787	4	6	0.0625	0.0531591	-0.546478	0.273059	0.846815	0.849025	0.681627	0.000150343	0.951727	FALSE
ENSG00000123685.9	225	1.02318	47.9521	31.2376	0.0298324	1:212653951:T:C	-45889	-45889	4	5	0.0520833	0.0213711	-0.697183	0.28935	0.759724	0.758377	0.657424	8.86063e-05	0.917933	FALSE
ENSG00000117697.15	140	1.0105	69.084	33.7084	0.0176823	1:212791942:C:G	160	160	21	26	0.270833	0.0156113	0.476214	0.187352	0.69903	0.704471	0.64103	5.71189e-05	0.895042	FALSE
ENSG00000203705.11	140	1.02523	68.0667	33.4247	0.00651351	1:212822212:GGAA:G	30384	30384	9	12	0.125	0.00535214	0.536338	0.180596	0.351765	0.347048	0.513462	6.31687e-05	0.716925	FALSE
ENSG00000185523.6	168	1.00734	70.6639	34.086	0.0201246	1:212853409:CT:C	5760	5760	8	11	0.114583	0.0185021	0.674146	0.272859	0.755624	0.759831	0.657787	5.48061e-05	0.91844	FALSE
ENSG00000198468.11	181	1.03035	62.2135	32.7543	3.6073e-08	1:212857816:C:T	-323	-323	31	42	0.5625	1.21673e-08	1.0141	0.137274	9.999e-05	1.49298e-06	0.000210715	7.11647e-05	0.000294212	TRUE
ENSG00000162769.13	180	1.00902	60.9543	32.8115	0.000483674	1:212896134:T:C	37859	37859	11	17	0.177083	0.000311192	0.707831	0.176908	0.0274973	0.0280418	0.18756	6.41719e-05	0.261881	FALSE
ENSG00000174606.14	80	1.02594	26.0722	31.8528	0.00163871	1:212997030:C:T	-18837	-18837	5	8	0.0833333	0.000956252	0.618191	0.17138	0.0351965	0.0381517	0.218721	0.00016553	0.30539	FALSE
ENSG00000136643.12	58	1.03103	20.9301	32.9117	0.0167962	1:213014417:T:A	-36816	-36816	14	20	0.208333	0.0136277	0.307183	0.118238	0.289371	0.284588	0.479409	0.000212235	0.669378	FALSE
ENSG00000143499.14	56	1.02215	29.2354	33.0652	0.0300222	1:214271223:GT:G	-9879	-9879	29	45	0.46875	0.0255293	0.2571	0.110207	0.591041	0.579931	0.605209	0.000144446	0.845027	FALSE
ENSG00000117724.15	2	1.02433	2.01755	33.4325	0.139298	1:214653021:G:A	49836	49836	3	6	0.0625	0.130236	-0.402941	0.260031	0.258074	0.251751	0.460372	0.00210668	0.642797	FALSE
ENSG00000250536.1	10	0.988623	3.98741	34.9313	0.598401	1:214653021:G:A	44181	44181	3	6	0.0625	0.598036	0.164188	0.308581	0.974303	0.974191	0.710873	0.000868057	0.992562	FALSE
ENSG00000136636.13	3	0.996721	1.94978	35.913	0.502479	1:215608232:A:G	40928	40928	5	8	0.0833333	0.508038	-0.141895	0.212177	0.739626	0.744537	0.654133	0.00186333	0.913339	FALSE
ENSG00000092978.11	61	1.02154	24.5101	32.8328	0.0473268	1:217612549:C:A	-18541	-18541	12	17	0.177083	0.0404884	0.273772	0.128675	0.688331	0.687024	0.635967	0.000171673	0.887973	FALSE
ENSG00000067533.6	3	1.00685	3.18988	36.504	0.313263	1:218329983:A:G	44690	44690	4	8	0.0833333	0.323586	-0.141363	0.141188	0.692831	0.696137	0.638289	0.00120869	0.891216	FALSE
ENSG00000143353.12	138	1.00332	29.8453	32.361	0.000802342	1:219194620:A:G	20751	20751	8	10	0.104167	0.000486738	0.792987	0.206204	0.019698	0.0233474	0.171697	0.00012668	0.239733	FALSE
ENSG00000277007.1	91	1.0519	33.1731	33.0744	0.0812021	1:219281166:T:C	10392	10392	3	5	0.0520833	0.0727277	0.585954	0.316682	0.932907	0.933842	0.7009	0.000150473	0.978637	FALSE
ENSG00000215817.9	45	0.970891	4.65193	36.0661	0.00157201	1:219627104:T:C	13999	13999	4	6	0.0625	0.00184983	1.17126	0.347691	0.00969903	0.00849153	0.100403	0.000666932	0.140188	FALSE
ENSG00000136628.18	99	1.01453	39.0208	33.3015	0.0211332	1:220088781:A:C	42251	42251	12	18	0.1875	0.0180539	0.229255	0.092404	0.561044	0.558801	0.598257	0.000103542	0.83532	FALSE
ENSG00000162813.18	90	1.02045	24.1482	31.6097	0.0264618	1:220123496:C:T	33034	33034	5	6	0.0625	0.0194329	-0.902938	0.368558	0.476352	0.466921	0.563936	0.00017315	0.787399	FALSE
ENSG00000067704.10	93	1.01519	24.8299	31.5922	0.00274292	1:220078479:A:AAAT	-15653	-15653	25	35	0.635417	0.00160528	-0.271485	0.0793717	0.0617938	0.0628845	0.274073	0.000163326	0.382677	FALSE
ENSG00000218283.2	33	1.03149	19.58	33.9841	0.00706958	1:220208056:A:G	-45514	-45514	5	5	0.0520833	0.00625537	-1.1684	0.401599	0.122688	0.120194	0.35603	0.000227448	0.497109	FALSE
ENSG00000118873.17	26	1.02087	13.9303	34.4509	0.0855975	1:220263600:G:A	-8929	-8929	4	5	0.0520833	0.0831073	0.444734	0.2493	0.705129	0.704901	0.64103	0.000300774	0.895042	FALSE
ENSG00000162817.7	188	0.97412	13.4588	30.5918	0.0237353	1:220697781:A:G	7418	7418	31	45	0.46875	0.0154655	0.442288	0.173739	0.292671	0.287898	0.48117	0.000234865	0.671837	FALSE
ENSG00000117791.16	218	1.03294	24.8764	31.2942	0.0134349	1:220704048:T:C	-44177	-44177	24	33	0.34375	0.00888432	-0.574756	0.207407	0.280172	0.271142	0.471379	0.000180533	0.658167	FALSE
ENSG00000286231.1	194	1.04706	59.567	31.8472	0.0131849	1:220797251:T:G	10261	10261	7	10	0.104167	0.00931309	0.728545	0.264701	0.536346	0.52458	0.586058	8.16282e-05	0.818288	FALSE
ENSG00000136630.13	97	1.02391	22.9531	31.1667	0.115579	1:220884320:G:A	4889	4889	16	19	0.197917	0.0951124	0.215447	0.125595	0.936106	0.937704	0.701833	0.000185832	0.979939	FALSE
ENSG00000257551.1	97	1.02784	22.7887	30.8238	0.0305666	1:220871696:CAAAA:C	-8444	-8444	6	8	0.0833333	0.0210702	-0.66407	0.274917	0.49945	0.493962	0.573842	0.000191432	0.801231	FALSE
ENSG00000143507.18	62	1.00385	22.9358	32.9398	0.0315669	1:221739019:T:C	-3070	-3070	23	28	0.708333	0.0266202	-0.416831	0.180084	0.524948	0.519008	0.583428	0.000165359	0.814616	FALSE
ENSG00000227925.2	28	1.01291	13.5586	33.7387	0.0403818	1:221833774:G:A	-6943	-6943	3	6	0.0625	0.0367673	0.656082	0.30215	0.429157	0.421986	0.544645	0.000295051	0.760465	FALSE
ENSG00000225265.2	106	1.01785	38.3695	33.2004	0.0102167	1:222589893:T:G	68	68	6	10	0.104167	0.00833716	-0.690236	0.246828	0.318468	0.31735	0.499593	0.000107361	0.69756	FALSE
ENSG00000143498.18	106	1.01616	38.5612	33.4178	0.0251624	1:222556801:G:A	-33132	-33132	31	48	0.5	0.0219025	-0.330564	0.137794	0.619638	0.618751	0.616554	0.00010578	0.860869	FALSE
ENSG00000154305.18	101	1.02224	35.8325	33.4113	0.00481178	1:222666496:A:G	48399	48399	14	16	0.833333	0.0038945	0.535683	0.173279	0.149385	0.151091	0.385852	0.000117923	0.538748	FALSE
ENSG00000272750.1	92	1.02148	35.7982	32.9486	0.00100177	1:222629034:A:G	-32478	-32478	18	23	0.239583	0.000692919	0.734887	0.19747	0.030297	0.0325149	0.201758	0.000117519	0.281706	FALSE
ENSG00000162819.12	89	0.996035	29.491	32.3087	0.00137944	1:222714209:C:CT	1656	1656	11	16	0.166667	0.000864057	0.52069	0.142918	0.0405959	0.0404677	0.225974	0.000122701	0.315518	FALSE
ENSG00000186063.13	91	1.01595	30.6704	32.1066	0.00995197	1:222716168:G:T	2958	2958	4	6	0.0625	0.00708482	0.567921	0.198528	0.257374	0.257217	0.463497	0.000132823	0.647162	FALSE
ENSG00000197520.11	106	0.996504	26.2228	32.3266	0.00659388	1:222732952:A:G	-4250	-4250	30	40	0.583333	0.00467774	0.515356	0.170557	0.159384	0.160498	0.393302	0.000138386	0.549151	FALSE
ENSG00000154309.9	96	1.06448	22.3313	31.6383	0.155748	1:222773862:C:A	-41160	-41160	4	7	0.0729167	0.135134	-0.380422	0.248726	0.971203	0.97407	0.710873	0.000239147	0.992562	FALSE
ENSG00000287338.1	143	0.993124	30.318	32.0471	0.0182553	1:223120762:T:C	17427	17427	6	8	0.0833333	0.0135738	0.823394	0.316735	0.433457	0.431329	0.548182	0.000117261	0.765403	FALSE
ENSG00000187554.14	181	0.989884	31.0893	31.3636	0.00989686	1:223115496:C:T	-27752	-27752	22	33	0.34375	0.0063901	0.241749	0.0833314	0.270373	0.270481	0.470598	0.000112109	0.657076	FALSE
ENSG00000162909.18	58	1.03621	26.1271	33.6764	0.00990621	1:223721692:G:C	20099	20099	3	5	0.0520833	0.00853832	0.572434	0.205398	0.215278	0.214362	0.43911	0.000175097	0.613111	FALSE
ENSG00000143514.18	78	0.980574	12.8679	32.8509	0.0719048	1:223841248:G:GAAATAAATA	-4706	-4706	5	8	0.0833333	0.0630955	0.432184	0.225148	0.620338	0.625479	0.618214	0.000255788	0.863185	FALSE
ENSG00000288999.2	78	0.974881	13.4425	33.4174	0.106159	1:223802264:C:T	-43817	-43817	7	9	0.09375	0.0981129	0.624117	0.367253	0.782522	0.786422	0.66561	0.00023628	0.929363	FALSE
ENSG00000291068.1	262	1.02252	47.1345	31.7127	0.000413177	1:223997159:T:C	4531	4531	23	37	0.614583	0.00020506	0.579923	0.139923	0.0162984	0.0174851	0.146697	8.98002e-05	0.204827	FALSE
ENSG00000290989.1	262	1.01247	48.948	32.1997	0.00263919	1:223992361:A:AGG	-382	-382	3	6	0.0625	0.00170784	0.766627	0.22562	0.118488	0.117621	0.353159	8.15542e-05	0.493101	FALSE
ENSG00000143756.12	195	1.00794	40.7451	32.0823	0.0203481	1:224135554:C:G	21443	21443	8	12	0.875	0.0153248	0.536705	0.210513	0.570843	0.563627	0.599699	9.53833e-05	0.837335	FALSE
ENSG00000143753.13	294	1.03858	61.2106	30.3549	0.039996	1:224185026:C:CAGAT	9270	9270	26	37	0.385417	0.0272637	0.229497	0.0995987	0.911709	0.91206	0.696291	7.57743e-05	0.972201	FALSE
ENSG00000237101.1	227	1.05074	65.5621	31.7576	0.0202367	1:224183934:G:C	-35679	-35679	5	5	0.0520833	0.0147144	-1.16997	0.455888	0.726027	0.720274	0.646489	7.56853e-05	0.902665	FALSE
ENSG00000143748.18	118	1.02267	34.0674	32.3748	0.0057704	1:224304679:C:T	-25510	-25510	3	6	0.0625	0.00407982	-0.553047	0.179923	0.168583	0.170655	0.402051	0.000124339	0.561367	FALSE
ENSG00000143771.12	159	1.0317	39.8565	31.1707	0.00164182	1:224382474:G:A	25616	25616	5	8	0.0833333	0.00084079	-0.358878	0.0982428	0.0518948	0.0573457	0.264259	0.000111922	0.368973	FALSE
ENSG00000143786.8	201	1.00324	41.0744	30.8095	0.067362	1:224442993:C:T	8333	8333	3	5	0.0520833	0.0509899	-0.486523	0.240744	0.943006	0.94264	0.702963	9.20062e-05	0.981518	FALSE
ENSG00000162923.18	200	1.00554	42.7856	30.9267	0.0990485	1:224445574:T:TA	8541	8541	13	16	0.833333	0.0790223	-0.213537	0.118031	0.989701	0.988327	0.71442	8.95482e-05	0.997514	FALSE
ENSG00000143815.15	178	1.01919	42.1839	32.4149	0.0231406	1:225406156:C:A	-22769	-22769	4	5	0.0520833	0.0182131	-0.503386	0.203199	0.620538	0.619299	0.616769	9.84194e-05	0.861169	FALSE
ENSG00000282418.1	122	1.01955	22.5496	32.3219	0.0228921	1:225466163:G:A	1142	1142	3	6	0.0625	0.0178365	-0.714544	0.287415	0.40216	0.397402	0.534847	0.000184455	0.746784	FALSE
ENSG00000234476.5	121	1.02086	20.1943	31.2702	0.0118469	1:225420733:A:G	-44667	-44667	29	37	0.614583	0.00770429	0.545146	0.19279	0.209179	0.205619	0.4321	0.000207523	0.603323	FALSE
ENSG00000143742.14	67	1.03174	32.129	33.4277	0.0040076	1:225792178:C:T	14365	14365	3	6	0.0625	0.00322509	0.563508	0.178178	0.107089	0.111816	0.346366	0.000138857	0.483616	FALSE
ENSG00000143819.13	138	1.0284	65.6272	33.5277	0.00522057	1:225834266:A:G	24142	24142	28	42	0.4375	0.00430854	-0.394481	0.12921	0.281572	0.277964	0.474815	6.67176e-05	0.662963	FALSE
ENSG00000242861.1	215	1.03023	56.2788	31.0908	0.00553085	1:225856891:C:T	10369	10369	5	5	0.0520833	0.00321692	-0.847816	0.267993	0.254575	0.254938	0.462546	7.86131e-05	0.645833	FALSE
ENSG00000196187.12	249	1.00982	57.2625	31.0652	0.000139818	1:225871810:G:A	-10570	-10570	3	5	0.0520833	5.20986e-05	-0.786314	0.170639	0.00679932	0.0075745	0.0945397	6.86329e-05	0.132002	FALSE
ENSG00000243709.1	177	1.0502	37.7114	30.1837	0.00511141	1:225881845:G:T	-29537	-29537	3	5	0.0520833	0.00254107	1.17025	0.359897	0.159084	0.158005	0.391025	0.00013115	0.545971	FALSE
ENSG00000255835.1	152	1.0189	40.1213	31.8152	0.0528781	1:225967653:CA:C	43374	43374	7	7	0.0729167	0.0421599	0.864217	0.409753	0.877812	0.883334	0.689266	0.000103303	0.962393	FALSE
ENSG00000143751.10	80	1.02379	26.4525	32.6415	0.000437813	1:226028494:G:C	29151	29151	6	10	0.104167	0.000269685	-0.499121	0.123224	0.00809919	0.0102566	0.111069	0.00016115	0.155081	FALSE
ENSG00000289341.2	82	1.00041	28.7939	34.0308	0.060934	1:226043093:C:T	43478	43478	3	6	0.0625	0.057321	0.677779	0.344824	0.833417	0.836285	0.67806	0.000129034	0.946746	FALSE
ENSG00000163041.13	198	1.02457	41.8393	31.6206	0.000353802	1:226080765:C:CA	18914	18914	20	28	0.291667	0.000169125	0.458835	0.108976	0.0117988	0.0131147	0.127369	0.000102364	0.17784	FALSE
ENSG00000272562.2	198	1.03877	42.4679	31.8352	0.0109304	1:226104623:T:G	42725	42725	3	5	0.0520833	0.00757885	-0.612128	0.215983	0.358364	0.354562	0.516159	0.000109316	0.720691	FALSE
ENSG00000182827.9	148	1.05842	44.3368	31.5336	0.0428153	1:226148462:A:G	-38279	-38279	15	20	0.208333	0.0327128	0.303263	0.136372	0.845015	0.842748	0.679785	0.000116676	0.949155	FALSE
ENSG00000185155.12	85	1.0181	23.3841	33.079	0.0089179	1:226173829:C:T	-49789	-49789	3	5	0.0520833	0.00712071	-0.844218	0.295317	0.180382	0.182186	0.412683	0.000176386	0.576212	FALSE
ENSG00000183814.16	52	1.01521	18.0814	32.7052	0.0205636	1:226260706:A:G	-49163	-49163	6	12	0.125	0.0165318	0.398413	0.15823	0.311269	0.306221	0.493014	0.000224278	0.688374	FALSE
ENSG00000143799.14	131	1.00615	22.3026	31.2999	0.105565	1:226406600:C:T	-1554	-1554	15	18	0.1875	0.0867352	0.260836	0.148001	0.912809	0.916046	0.697153	0.000172397	0.973405	FALSE
ENSG00000229965.1	95	1.01662	11.1039	31.8217	0.038534	1:226395716:C:T	-42848	-42848	3	6	0.0625	0.0298911	0.704841	0.311354	0.346565	0.345859	0.513159	0.000368095	0.716502	FALSE
ENSG00000143772.11	174	1.01522	46.3941	31.4343	0.00701355	1:226693229:A:G	-46094	-46094	9	13	0.135417	0.00440958	-0.247947	0.0814494	0.272773	0.271796	0.471853	8.74424e-05	0.658829	FALSE
ENSG00000181450.18	47	1.00521	15.8968	34.6571	0.155802	1:227577156:T:C	13613	13613	3	6	0.0625	0.153742	0.250026	0.171479	0.928507	0.931656	0.700584	0.000240499	0.978195	FALSE
ENSG00000143740.15	166	1.01803	25.1317	30.0331	0.0383845	1:227771505:A:G	43305	43305	5	6	0.0625	0.0252202	-0.478434	0.204619	0.622238	0.618356	0.616408	0.000164059	0.860664	FALSE
ENSG00000081692.13	163	1.01973	26.5125	30.1955	0.00735955	1:227724602:AT:A	-10809	-10809	10	15	0.15625	0.00386857	0.508438	0.164331	0.174783	0.170667	0.402051	0.00015706	0.561367	FALSE
ENSG00000286389.2	60	0.994865	18.4101	32.5789	0.0277612	1:227780332:T:C	-6421	-6421	28	35	0.635417	0.0224807	0.455098	0.190593	0.414559	0.406958	0.53858	0.000195167	0.751997	FALSE
ENSG00000276255.2	60	0.978064	14.9672	32.885	0.00957191	1:228032794:A:G	-43756	-43756	18	24	0.75	0.00749196	0.46132	0.162511	0.144886	0.141199	0.378893	0.000216474	0.529032	FALSE
ENSG00000143761.17	67	1.02035	16.3561	31.993	0.12998	1:228109044:C:T	26336	26336	27	36	0.625	0.113013	-0.106	0.0652078	0.891811	0.893964	0.691665	0.000255431	0.965742	FALSE
ENSG00000143793.13	81	1.01369	19.9117	31.6609	0.00581419	1:228142144:CGGT:C	36733	36733	4	6	0.9375	0.00370773	-0.603457	0.194034	0.10249	0.10581	0.33882	0.000201871	0.47308	FALSE
ENSG00000162910.19	83	0.990694	21.3491	31.7463	0.0174392	1:228146735:G:A	37423	37423	20	25	0.260417	0.0124907	-0.235249	0.0893222	0.319768	0.317452	0.499618	0.000164076	0.697596	FALSE
ENSG00000280157.1	86	1.02944	24.8641	31.3116	0.0146529	1:228163073:C:T	41550	41550	3	6	0.0625	0.00980186	0.800773	0.293126	0.29517	0.293854	0.484644	0.000177071	0.676688	FALSE
ENSG00000143774.18	110	1.00514	30.9455	32.4204	0.00345252	1:228102275:A:G	-37687	-37687	5	5	0.0520833	0.00236514	1.31689	0.401709	0.10419	0.100112	0.330736	0.000123511	0.461793	FALSE
ENSG00000198835.4	120	1.03251	33.2591	31.3699	0.0119697	1:228110565:G:A	-39365	-39365	5	5	0.0520833	0.00789292	-1.24472	0.441686	0.317268	0.314962	0.497713	0.000134728	0.694936	FALSE
ENSG00000203684.5	149	0.982899	43.0398	32.7852	0.0137088	1:228176904:T:C	11392	11392	21	32	0.333333	0.0108371	-0.361006	0.134133	0.455954	0.456323	0.5597	7.75577e-05	0.781485	FALSE
ENSG00000181873.13	149	0.991782	41.4696	32.2391	0.0104308	1:228146576:C:T	-19228	-19228	32	44	0.541667	0.00757989	-0.52693	0.185926	0.360164	0.356575	0.516574	8.50274e-05	0.72127	FALSE
ENSG00000154358.23	226	1.02127	49.8633	32.005	0.00887501	1:228184188:CT:C	-23856	-23856	13	19	0.197917	0.00617524	0.351215	0.120511	0.350865	0.348743	0.513919	8.42759e-05	0.717564	FALSE
ENSG00000162913.10	227	1.0122	47.6159	31.5968	2.3221e-05	1:228214420:A:G	756	756	28	43	0.552083	8.32159e-06	0.520483	0.0997684	0.00119988	0.00101187	0.0258717	8.37023e-05	0.0361236	TRUE
ENSG00000269934.3	228	1.01956	47.1816	31.0055	0.00992731	1:228245645:C:T	-30421	-30421	4	7	0.0729167	0.0061088	-0.566783	0.194197	0.372563	0.366075	0.521726	8.81862e-05	0.728464	FALSE
ENSG00000287315.1	158	1.02569	39.2728	30.6846	0.0305548	1:228405521:T:G	36967	36967	6	8	0.0833333	0.0207667	0.63569	0.262495	0.69973	0.694649	0.637888	0.000109755	0.890656	FALSE
ENSG00000154370.16	93	1.02993	33.5919	32.0006	0.0153297	1:228400979:A:C	-5856	-5856	14	15	0.15625	0.011173	-0.407092	0.151953	0.39556	0.390477	0.531918	0.000131454	0.742695	FALSE
ENSG00000231563.3	93	1.0162	32.7254	31.8123	0.026182	1:228442527:C:T	35331	35331	5	7	0.0729167	0.0196015	0.697348	0.285067	0.572443	0.572995	0.602806	0.000124666	0.841673	FALSE
ENSG00000162931.12	69	1.01486	29.1881	33.2888	0.0558557	1:228386035:G:C	-30826	-30826	26	35	0.364583	0.0498321	-0.406356	0.20001	0.811319	0.809064	0.670806	0.000138679	0.936618	FALSE
ENSG00000181218.6	65	1.01408	29.1471	32.9419	0.0110758	1:228484825:A:G	26952	26952	32	42	0.4375	0.00880331	-0.526781	0.189845	0.275772	0.270955	0.471128	0.000138242	0.657816	FALSE
ENSG00000196890.5	65	1.00935	29.0608	32.851	0.0232583	1:228482752:T:TGGAA	24649	24649	20	23	0.239583	0.0191146	-0.615916	0.250687	0.494251	0.490881	0.573166	0.000134846	0.800288	FALSE
ENSG00000168159.15	64	1.01309	21.2596	32.2312	0.232013	1:228442527:C:T	-44855	-44855	5	7	0.0729167	0.21268	0.330222	0.260143	0.9958	0.996234	0.715436	0.000188413	0.998933	FALSE
ENSG00000215811.6	56	1.00416	18.7334	32.6121	0.0053821	1:228492370:T:G	-19935	-19935	4	5	0.0520833	0.00391661	-0.859761	0.278303	0.0984902	0.0950752	0.323979	0.00020282	0.452359	FALSE
ENSG00000234975.6	21	0.937123	4.53463	35.3435	0.00885506	1:228735946:C:T	48531	48531	15	20	0.208333	0.00919623	-0.367369	0.133231	0.0541946	0.0493404	0.248559	0.00054964	0.347052	FALSE
ENSG00000116574.6	54	1.00074	13.3528	33.35	0.00132296	1:228751797:G:T	16318	16318	3	6	0.0625	0.000999898	0.675463	0.188089	0.0157984	0.0174646	0.146681	0.000278776	0.204805	FALSE
ENSG00000168118.12	83	1.00094	22.5054	31.8174	0.0126332	1:229279315:A:G	8253	8253	4	6	0.0625	0.00885665	0.812841	0.293192	0.249275	0.24843	0.459265	0.000165612	0.641252	FALSE
ENSG00000177788.7	83	1.00067	22.4913	32.1677	0.00345544	1:229294660:G:C	23418	23418	3	6	0.0625	0.00227396	-1.0223	0.31047	0.0749925	0.0747504	0.294091	0.000165448	0.410626	FALSE
ENSG00000237481.1	117	0.990076	34.1774	32.667	0.0298604	1:229342020:A:G	22617	22617	8	13	0.135417	0.0244941	-0.514119	0.218697	0.647635	0.649319	0.624651	0.000102098	0.872173	FALSE
ENSG00000154429.11	88	1.02258	25.721	30.7568	0.000548402	1:229332283:C:G	-11011	-11011	18	25	0.260417	0.000224144	-0.559583	0.136016	0.0106989	0.0126067	0.125462	0.00016458	0.175177	FALSE
ENSG00000143632.15	72	1.0074	10.874	31.9561	0.0187185	1:229449328:A:G	15224	15224	9	9	0.09375	0.0138101	0.779106	0.300519	0.185381	0.182986	0.41346	0.000356126	0.577297	FALSE
ENSG00000069248.12	86	1.03449	16.8092	30.4304	0.124527	1:229554184:G:C	45843	45843	4	6	0.0625	0.0991268	0.29977	0.176949	0.884912	0.886904	0.690352	0.000269426	0.96391	FALSE
ENSG00000135776.5	90	1.01002	22.7563	31.8511	0.00721824	1:229541474:G:C	-17233	-17233	10	11	0.114583	0.00482895	0.456659	0.151744	0.153785	0.148596	0.384391	0.000172876	0.536709	FALSE
ENSG00000135801.11	143	1.00058	37.8028	32.5255	0.186841	1:229669146:G:A	43024	43024	6	11	0.114583	0.170683	-0.245316	0.17538	1	0.999597	0.7161	9.83859e-05	0.99986	FALSE
ENSG00000135763.10	144	1.02048	36.8425	32.1829	0.0101628	1:229594705:G:A	-31542	-31542	30	36	0.375	0.00731798	-0.441697	0.155093	0.308169	0.304202	0.492157	0.00011353	0.687178	FALSE
ENSG00000228058.4	112	0.987944	10.7531	32.0023	0.0116797	1:230006631:A:T	4259	4259	3	6	0.0625	0.00831825	0.673902	0.24091	0.122988	0.122276	0.359048	0.000320369	0.501323	FALSE
ENSG00000143641.10	122	1.02033	46.1317	34.1038	0.0188339	1:230096333:A:G	38343	38343	7	11	0.114583	0.0173172	0.500365	0.200265	0.582242	0.574848	0.603342	9.05965e-05	0.84242	FALSE
ENSG00000135775.14	120	1.02094	28.3868	32.837	0.00144342	1:230679451:G:A	36970	36970	3	5	0.0520833	0.00099979	-0.680552	0.189504	0.0360964	0.037244	0.216301	0.000147726	0.302013	FALSE
ENSG00000119280.17	136	1.0165	27.8093	31.2768	0.016489	1:230902391:T:TAAA	32798	32798	6	7	0.0729167	0.0111252	0.691779	0.25805	0.368963	0.36234	0.519384	0.000146954	0.725193	FALSE
ENSG00000143643.13	240	1.04214	68.8353	33.03	0.0013953	1:230991791:T:C	12916	12916	8	12	0.125	0.000998666	0.550312	0.153221	0.0791921	0.081458	0.304139	6.87386e-05	0.424656	FALSE
ENSG00000173409.14	241	1.029	68.8921	33.1902	0.00318654	1:230938565:T:C	-40416	-40416	10	13	0.864583	0.00244849	0.671911	0.205767	0.184482	0.186289	0.415843	6.37747e-05	0.580624	FALSE
ENSG00000182118.8	106	1.01635	24.9961	32.194	0.0399671	1:231019753:G:C	-20501	-20501	6	7	0.0729167	0.0321089	0.584154	0.261708	0.637936	0.632371	0.620124	0.000163343	0.865853	FALSE
ENSG00000143633.13	156	1.00549	22.7127	31.1319	0.0173957	1:231193143:C:A	-48044	-48044	24	30	0.3125	0.0116074	0.376247	0.141256	0.327867	0.32616	0.504647	0.000168622	0.704617	FALSE
ENSG00000116906.13	156	1.00422	23.8669	31.3519	0.129947	1:231266156:G:A	24949	24949	31	36	0.625	0.109309	0.362806	0.2208	0.965103	0.963633	0.708102	0.00015926	0.988692	FALSE
ENSG00000010072.16	157	0.985381	35.0895	32.8886	0.0357578	1:231289740:G:A	-47364	-47364	5	6	0.0625	0.0302348	-0.632575	0.280056	0.726527	0.726644	0.648807	9.66094e-05	0.905901	FALSE
ENSG00000116903.7	164	1.01722	34.6073	32.4541	0.00519041	1:231353607:G:T	15755	15755	30	41	0.572917	0.00368284	-0.453471	0.145689	0.159184	0.15875	0.391906	0.000118593	0.547201	FALSE
ENSG00000162946.23	45	1.01498	29.1754	34.2051	0.00117665	1:231660661:G:A	33871	33871	3	6	0.0625	0.00102892	-0.464214	0.129635	0.0311969	0.0319021	0.200061	0.000138837	0.279337	FALSE
ENSG00000116991.12	136	1.03809	46.5909	33.2284	0.0163149	1:232633504:A:C	2933	2933	18	28	0.708333	0.0136663	0.244762	0.094254	0.522348	0.517505	0.582505	9.92672e-05	0.813327	FALSE
ENSG00000135778.12	53	0.99326	16.1838	32.4516	8.15308e-06	1:232978081:G:T	27476	27476	19	21	0.21875	3.56176e-06	1.00385	0.182634	0.00019998	0.000140497	0.00659425	0.000219864	0.00920728	TRUE
ENSG00000135749.19	19	1.00855	12.3093	34.8741	0.0313881	1:233290930:G:T	-4795	-4795	5	9	0.09375	0.0310795	-0.236002	0.105051	0.324768	0.320734	0.502038	0.000316762	0.700974	FALSE
ENSG00000143674.11	12	1.00635	9.90353	35.1321	0.0459456	1:233373020:C:T	45296	45296	9	10	0.104167	0.0463618	-0.634632	0.307282	0.370663	0.369386	0.523546	0.000388588	0.731005	FALSE
ENSG00000236358.1	41	1.02586	25.0145	33.2751	0.0235924	1:234377961:A:G	20955	20955	4	7	0.0729167	0.0202071	0.633794	0.260462	0.443656	0.437244	0.549868	0.000172446	0.767758	FALSE
ENSG00000235605.1	41	1.02037	25.5762	33.5455	0.0322041	1:234370870:A:G	13729	13729	6	9	0.09375	0.0286348	-0.548286	0.240191	0.558244	0.557816	0.597724	0.000163412	0.834576	FALSE
ENSG00000168275.16	60	1.0285	30.4831	33.7008	1.76019e-06	1:234373513:G:C	57	57	36	47	0.510417	1.10651e-06	0.557572	0.0948029	0.00019998	4.00652e-05	0.00260853	0.000143678	0.00364218	TRUE
ENSG00000231663.3	60	1.00916	29.6083	33.6401	0.00084782	1:234373210:A:C	-454	-454	7	7	0.0729167	0.00066304	1.26801	0.339304	0.0238976	0.0238869	0.174098	0.000132205	0.243086	FALSE
ENSG00000059588.10	92	1.00872	21.8928	33.644	0.00515716	1:234472580:C:A	-6599	-6599	9	16	0.166667	0.00432183	0.342799	0.112325	0.105889	0.104616	0.337685	0.000178319	0.471496	FALSE
ENSG00000168264.11	70	1.04195	16.4445	31.3982	0.0440806	1:234589389:C:T	-20789	-20789	3	5	0.0520833	0.0333876	0.415279	0.187512	0.506449	0.504087	0.576763	0.000287123	0.80531	FALSE
ENSG00000289377.2	30	1.02218	10.0132	32.7927	0.096115	1:234748971:G:C	-23828	-23828	4	8	0.0833333	0.0854508	0.443411	0.250524	0.627737	0.627349	0.618482	0.000421451	0.86356	FALSE
ENSG00000286263.1	186	1.00909	70.3456	32.3922	0.0300831	1:234949958:G:A	17305	17305	4	7	0.0729167	0.0240772	-0.625744	0.265343	0.879312	0.881589	0.689057	5.56287e-05	0.962101	FALSE
ENSG00000238005.5	177	1.02184	65.2654	32.0686	0.000121575	1:234968481:A:G	-1581	-1581	13	15	0.15625	5.8883e-05	0.488631	0.106991	0.00609939	0.00704603	0.0912538	6.46041e-05	0.127414	FALSE
ENSG00000258082.2	172	1.03765	57.6257	31.5694	0.00270063	1:234966337:G:A	-14467	-14467	6	8	0.0833333	0.00157181	-0.649452	0.18945	0.130987	0.13221	0.369958	8.00673e-05	0.516557	FALSE
ENSG00000173726.11	145	1.0202	35.7001	30.9197	0.00703626	1:235142926:CA:C	14089	14089	13	19	0.197917	0.0041035	0.274731	0.0894424	0.215278	0.214611	0.439308	0.000116972	0.613388	FALSE
ENSG00000188739.15	181	1.014	41.6146	31.652	0.0685184	1:235208287:A:G	47004	47004	7	10	0.104167	0.0552461	0.550255	0.277471	0.945005	0.946466	0.703329	9.67888e-05	0.982028	FALSE
ENSG00000054267.22	212	1.01344	41.4431	30.6445	0.0362068	1:235331656:A:G	3437	3437	8	13	0.135417	0.0250422	0.260031	0.111065	0.778422	0.778945	0.663265	9.68704e-05	0.926089	FALSE
ENSG00000162885.14	23	1.00319	13.3221	35.1869	0.00863622	1:235489470:C:CT	-14982	-14982	3	6	0.0625	0.00881758	-0.73362	0.264449	0.105989	0.108233	0.341068	0.000283537	0.476219	FALSE
ENSG00000143669.16	152	1.01783	29.5945	31.1897	0.00130902	1:235857783:C:CAT	-25942	-25942	7	7	0.0729167	0.000655508	0.6615	0.176819	0.0321968	0.0356144	0.210662	0.000139166	0.294138	FALSE
ENSG00000116962.15	76	1.0053	11.5023	33.7546	0.195673	1:236044846:C:CG	-20263	-20263	3	6	0.0625	0.187511	0.353481	0.262955	0.917708	0.917558	0.697748	0.000332525	0.974236	FALSE
ENSG00000077585.14	49	1.01739	24.1926	33.1	0.0514716	1:236189444:T:C	46939	46939	3	6	0.0625	0.0451285	0.42543	0.204751	0.718728	0.715223	0.644724	0.000169791	0.9002	FALSE
ENSG00000086619.15	91	1.03996	43.4576	32.9771	0.0297068	1:236273861:A:G	-8158	-8158	3	6	0.0625	0.0250497	0.541681	0.231378	0.716728	0.715976	0.644763	0.000107542	0.900255	FALSE
ENSG00000116977.19	389	1.05283	79.4057	31.7337	0.000870257	1:236546478:T:G	28478	28478	22	36	0.375	0.000466891	0.475829	0.123266	0.0510949	0.0566414	0.262963	6.32148e-05	0.367164	FALSE
ENSG00000223776.5	399	1.04984	88.4653	32.1559	0.0294235	1:236495833:G:T	-28675	-28675	3	6	0.0625	0.022999	-0.785189	0.330189	0.918808	0.922153	0.698401	5.58202e-05	0.975148	FALSE
ENSG00000273058.2	409	1.0512	94.4846	32.1423	0.000198459	1:236534367:G:T	-2337	-2337	4	6	0.0625	0.000102233	-0.987962	0.225493	0.0123988	0.01482	0.135359	5.2657e-05	0.188996	FALSE
ENSG00000230325.1	364	1.02524	90.8347	32.7033	0.00621417	1:236531190:C:T	-19090	-19090	5	6	0.0625	0.00462426	-0.869452	0.287326	0.424558	0.42008	0.543843	4.73406e-05	0.759345	FALSE
ENSG00000119285.11	124	1.03451	43.8994	33.038	0.00245983	1:236576566:A:T	-27950	-27950	3	6	0.0625	0.00181991	0.458131	0.135757	0.090291	0.093446	0.3212	0.000103248	0.448477	FALSE
ENSG00000116984.15	81	1.02858	23.5793	31.899	0.108953	1:236827275:GT:G	32015	32015	3	6	0.0625	0.0929222	-0.219052	0.126814	0.928407	0.930685	0.700441	0.000185801	0.977996	FALSE
ENSG00000237991.3	1	1.01264	1.00241	35.7894	0.433117	1:236936356:C:G	-44983	-44983	3	5	0.0520833	0.438307	0.256186	0.326762	0.436856	0.429335	0.547969	0.00395799	0.765105	FALSE
ENSG00000233355.7	11	0.937585	1.89361	40.8756	0.353582	1:239742092:GT:G	-28038	-28038	22	33	0.34375	0.391154	-0.0948745	0.109267	0.557744	0.586438	0.606623	0.00133112	0.847002	FALSE
ENSG00000091483.8	90	1.02068	27.7085	32.5831	0.0213115	1:241566387:AAGCTCCCTG:A	46588	46588	9	13	0.135417	0.016962	-0.482471	0.192435	0.440956	0.439515	0.55135	0.000151113	0.769827	FALSE
ENSG00000117009.12	92	1.04707	29.5607	32.6434	0.0150816	1:241533410:T:G	1276	1276	7	7	0.0729167	0.0118059	-0.945485	0.355888	0.343566	0.339811	0.510171	0.000164424	0.71233	FALSE
ENSG00000054277.14	36	0.975721	8.87289	33.5486	0.0810983	1:241629884:C:G	-47492	-47492	11	12	0.125	0.0747123	0.502282	0.273424	0.532047	0.539006	0.590236	0.000360001	0.824122	FALSE
ENSG00000229022.1	21	0.955319	4.45757	36.5414	0.370377	1:241878999:G:A	47064	47064	4	6	0.0625	0.380809	0.297097	0.334715	0.877212	0.880926	0.689057	0.000630398	0.962101	FALSE
ENSG00000054282.16	124	0.946234	5.34142	31.9858	0.0538037	1:243281670:G:C	25636	25636	26	35	0.364583	0.0435315	-0.370373	0.176839	0.277572	0.279173	0.475612	0.000495366	0.664077	FALSE
ENSG00000289055.2	9	1.01448	7.39236	33.9486	0.0452065	1:244049564:C:T	1319	1319	23	25	0.260417	0.0419568	-0.541015	0.256244	0.284472	0.283281	0.478333	0.000545848	0.667876	FALSE
ENSG00000179456.12	9	0.991964	7.47793	34.6388	0.303626	1:244046534:C:T	-2013	-2013	5	6	0.0625	0.301082	-0.267719	0.25506	0.933907	0.9341	0.700974	0.000472164	0.97874	FALSE
ENSG00000289439.2	228	1.01486	39.6072	32.1413	6.18274e-11	1:244325113:G:A	-66	-66	25	34	0.354167	8.62819e-12	0.904385	0.0904992	9.999e-05	1.81254e-09	1.12747e-06	0.000102207	1.57423e-06	TRUE
ENSG00000240963.1	119	1.02255	39.6769	32.3928	0.00339373	1:244390205:C:T	-19387	-19387	6	8	0.0833333	0.00231177	0.867294	0.263883	0.118488	0.119387	0.355205	0.000106692	0.495957	FALSE
ENSG00000035687.10	63	1.01826	27.7612	33.0026	0.00985374	1:244442242:TAC:T	-9667	-9667	7	10	0.104167	0.0078372	-0.449436	0.159323	0.238476	0.232699	0.450225	0.000148724	0.62863	FALSE
ENSG00000121644.19	63	1.03724	26.0737	34.2143	0.233617	1:244665131:A:G	12028	12028	4	6	0.0625	0.228246	0.275882	0.224958	0.9988	0.998935	0.715986	0.000176473	0.9997	FALSE
ENSG00000203667.10	155	1.02336	28.7715	30.3032	0.0144045	1:244816622:A:C	-18994	-18994	5	6	0.0625	0.00847135	0.912004	0.326873	0.336666	0.330335	0.506017	0.000147801	0.70653	FALSE
ENSG00000153187.21	150	1.02573	28.8815	30.5349	0.031433	1:244817583:AAAAC:A	-46977	-46977	6	8	0.0833333	0.0211181	0.514525	0.213093	0.59904	0.591108	0.607384	0.000149257	0.848064	FALSE
ENSG00000203666.13	50	1.00858	28.2816	35.3035	0.00221277	1:244958872:A:ATT	-10810	-10810	4	7	0.0729167	0.00231355	-0.359837	0.109493	0.0582942	0.0590864	0.267628	0.000137931	0.373677	FALSE
ENSG00000272195.1	50	1.04069	27.4648	34.2914	0.0156599	1:244975079:T:C	3991	3991	3	6	0.0625	0.0146084	0.838912	0.326508	0.336266	0.332753	0.507208	0.000170807	0.708194	FALSE
ENSG00000185420.19	184	1.03177	61.9346	32.9873	0.0467026	1:246547549:A:G	40237	40237	3	6	0.0625	0.0403984	-0.268462	0.126119	0.945605	0.945115	0.703329	7.20647e-05	0.982028	FALSE
ENSG00000162851.8	180	1.03753	59.1501	32.8127	0.0108116	1:246610929:A:AT	44668	44668	4	5	0.0520833	0.00844993	-0.811137	0.290617	0.462054	0.456249	0.559671	7.7952e-05	0.781445	FALSE
ENSG00000162852.14	178	1.03272	57.7901	32.6172	0.000695021	1:246564468:A:G	-1976	-1976	4	5	0.0520833	0.000439734	0.974184	0.251007	0.0326967	0.0349511	0.209504	7.76488e-05	0.292521	FALSE
ENSG00000260698.1	160	1.02167	57.0729	32.6715	0.0204469	1:246644953:A:G	-37155	-37155	4	7	0.0729167	0.0163758	0.625612	0.248072	0.685831	0.684	0.634917	7.38029e-05	0.886508	FALSE
ENSG00000143653.10	69	1.01352	34.3612	33.9772	0.0182933	1:246676077:CT:C	-48335	-48335	16	21	0.21875	0.0166029	0.432506	0.171892	0.467653	0.463226	0.562816	0.000116885	0.785836	FALSE
ENSG00000227953.7	96	1.01621	35.567	32.5121	0.0485277	1:246752764:G:C	-23116	-23116	3	6	0.0625	0.0405686	0.522627	0.245744	0.825417	0.825325	0.674719	0.000114716	0.942082	FALSE
ENSG00000223519.8	140	1.0422	50.1105	31.6407	0.00810945	1:246869776:C:T	30165	30165	8	13	0.135417	0.00532729	0.640038	0.215383	0.323068	0.315469	0.497976	9.44438e-05	0.695302	FALSE
ENSG00000153207.16	110	1.03268	30.1653	30.7274	0.0101593	1:246920627:G:C	-11321	-11321	18	26	0.270833	0.00603414	-0.293015	0.100232	0.252375	0.250997	0.460301	0.000148681	0.642699	FALSE
ENSG00000188295.15	170	1.02662	42.6949	31.0849	0.00420835	1:247104643:T:TTA	270	270	4	5	0.0520833	0.00236837	1.2327	0.376085	0.155784	0.155487	0.389349	0.000101501	0.543631	FALSE
ENSG00000196418.13	293	1.02461	94.2431	32.0643	0.00320908	1:247183372:A:G	11352	11352	3	6	0.0625	0.00206387	-0.669659	0.20119	0.256274	0.250657	0.460233	4.54636e-05	0.642604	FALSE
ENSG00000259865.1	251	1.0371	78.1293	31.5998	0.0148624	1:247143615:T:C	-44911	-44911	4	7	0.0729167	0.0103072	0.536939	0.198013	0.679832	0.675053	0.632625	5.88784e-05	0.883308	FALSE
ENSG00000290124.1	248	1.03108	76.6597	31.6724	4.76638e-06	1:247190481:T:C	756	756	33	41	0.572917	1.49025e-06	-1.01015	0.174667	0.00019998	0.000281909	0.0108979	5.79976e-05	0.0152162	TRUE
ENSG00000227671.5	225	1.02157	66.0604	31.5095	1.1905e-07	1:247189421:T:C	-20072	-20072	31	46	0.479167	2.34231e-08	-0.563907	0.0787022	9.999e-05	6.04808e-06	0.000618427	6.37271e-05	0.000863483	TRUE
ENSG00000290683.1	224	1.02889	70.2042	32.0102	0.000286659	1:247199888:G:A	-10968	-10968	9	11	0.114583	0.000147578	1.04454	0.245379	0.0169983	0.0175808	0.146805	6.25438e-05	0.204977	FALSE
ENSG00000162714.13	160	1.00897	49.9961	32.3774	0.000925109	1:247321154:C:A	-10713	-10713	6	9	0.09375	0.000569285	0.734134	0.193665	0.0433957	0.0438204	0.234932	7.82122e-05	0.328025	FALSE
ENSG00000162711.18	269	1.03769	69.0337	31.6424	0.0422545	1:247375148:C:T	-41008	-41008	4	7	0.0729167	0.0325457	-0.53729	0.241363	0.942406	0.945496	0.703329	6.68551e-05	0.982028	FALSE
ENSG00000169224.13	43	0.981238	12.4841	33.2767	0.00252239	1:247461219:T:C	-45839	-45839	21	34	0.354167	0.00194182	0.553259	0.165108	0.0328967	0.0333583	0.204961	0.000264747	0.286178	FALSE
ENSG00000162722.9	253	1.03964	51.5128	30.7722	0.0237844	1:247876716:A:G	19529	19529	23	29	0.302083	0.0158123	-0.3502	0.138065	0.69883	0.695734	0.638289	9.05699e-05	0.891216	FALSE
ENSG00000238243.3	259	1.02256	62.4026	31.919	0.00453259	1:247878115:A:T	-17472	-17472	12	15	0.15625	0.00293616	-0.453373	0.141777	0.241276	0.237267	0.45245	6.78491e-05	0.631737	FALSE
ENSG00000177462.9	229	1.02393	51.5407	31.8029	0.00172619	1:247896838:ATTGTGGC:A	-23414	-23414	13	18	0.1875	0.00100281	0.631951	0.176024	0.0765923	0.0795573	0.301374	8.27958e-05	0.420796	FALSE
ENSG00000259823.6	99	1.05711	30.5677	31.7175	0.000487068	1:248781824:G:A	26065	26065	5	6	0.0625	0.000245968	-1.15811	0.283698	0.00849915	0.0113441	0.117502	0.000167983	0.164063	FALSE
ENSG00000175137.11	151	1.03349	40.0524	30.6408	0.00860185	1:248850187:C:CA	24272	24272	5	5	0.0520833	0.0049392	-0.673519	0.22445	0.284372	0.277509	0.47467	0.00011251	0.662761	FALSE
ENSG00000171161.13	144	1.03125	37.4391	30.6919	0.00216913	1:248815525:A:T	-22685	-22685	6	7	0.0729167	0.00104784	-0.592606	0.165791	0.0678932	0.0712067	0.287652	0.000118841	0.401636	FALSE
ENSG00000171163.16	134	1.03194	29.1979	30.0329	0.0630523	1:248813215:T:C	-45929	-45929	12	14	0.145833	0.0445365	-0.544571	0.261324	0.841116	0.843146	0.679924	0.000152961	0.949348	FALSE
ENSG00000185220.12	52	1.00996	16.0219	32.2492	0.018531	1:248873908:G:C	-32288	-32288	3	6	0.0625	0.0141009	0.6149	0.237969	0.261574	0.254653	0.462502	0.000245422	0.645772	FALSE
ENSG00000233084.2	19	0.938891	6.27101	36.025	0.0287706	1:248916508:G:A	-20073	-20073	6	8	0.0833333	0.0311736	-0.571422	0.254507	0.193681	0.189986	0.419427	0.000401509	0.585628	FALSE
ENSG00000184731.6	63	1.01228	7.50093	35.5281	0.226294	2:68053:G:C	21183	21183	3	5	0.0520833	0.229826	0.329218	0.26938	0.854115	0.851382	0.682708	0.000531117	0.953236	FALSE
ENSG00000143727.16	119	1.02052	38.3399	32.2322	0.025115	2:282126:G:A	17986	17986	8	11	0.114583	0.019532	0.39152	0.15995	0.613139	0.614028	0.614969	0.000109123	0.858655	FALSE
ENSG00000035115.22	119	1.03187	39.9229	32.4128	9.71704e-05	2:267367:G:T	969	969	3	6	0.0625	5.07095e-05	-0.599651	0.129876	0.0019998	0.00320078	0.0576624	0.000111844	0.0805115	TRUE
ENSG00000228643.1	87	1.01907	33.9607	33.1271	0.0206366	2:246077:C:T	-40342	-40342	3	5	0.0520833	0.0173106	0.867805	0.347307	0.50495	0.498393	0.575181	0.000122157	0.803101	FALSE
ENSG00000233296.2	99	1.0012	21.0314	31.8592	0.000225308	2:676782:C:A	-404	-404	5	8	0.0833333	0.00010929	1.03473	0.237391	0.00419958	0.00469539	0.0716101	0.000177494	0.0999861	TRUE
ENSG00000151353.15	99	1.03213	20.4709	30.918	0.0323833	2:678386:G:T	980	980	7	12	0.125	0.0226887	-0.378572	0.158808	0.481352	0.47506	0.567139	0.000218348	0.791872	FALSE
ENSG00000235688.3	132	0.957573	5.09074	33.4313	0.461153	2:914148:C:T	-37354	-37354	6	9	0.09375	0.450674	0.192076	0.251793	0.965303	0.96008	0.707132	0.000559788	0.987338	FALSE
ENSG00000289608.2	47	0.950455	4.40526	35.304	0.0431176	2:2695533:G:A	13424	13424	12	19	0.197917	0.0440389	0.379235	0.181533	0.19668	0.194878	0.423875	0.000618076	0.591838	FALSE
ENSG00000236760.1	162	1.03534	42.0772	31.6411	0.0329004	2:3160928:G:A	15148	15148	3	5	0.0520833	0.0247456	0.932604	0.397461	0.745925	0.743361	0.65355	0.000108223	0.912524	FALSE
ENSG00000032389.13	159	1.05395	38.299	31.8694	0.00711959	2:3352574:C:T	-25256	-25256	3	6	0.0625	0.00476921	-0.600458	0.19921	0.220178	0.217345	0.440808	0.000131816	0.615482	FALSE
ENSG00000171853.16	161	1.02524	37.3104	31.8468	0.00199242	2:3343004:G:T	-36671	-36671	5	8	0.0833333	0.0011827	0.820804	0.232459	0.0627937	0.0664241	0.279596	0.000115227	0.390388	FALSE
ENSG00000235078.1	398	1.02401	54.1459	29.9464	0.0187604	2:3544778:CT:C	25503	25503	6	6	0.0625	0.0109637	-1.09017	0.405765	0.630937	0.631219	0.620124	7.88495e-05	0.865853	FALSE
ENSG00000182551.14	398	1.03966	54.3475	29.9053	0.000323101	2:3498938:A:G	-20593	-20593	23	27	0.28125	9.82527e-05	0.851368	0.193724	0.0108989	0.0145798	0.134261	8.58574e-05	0.187463	FALSE
ENSG00000234171.5	233	1.03659	49.4132	31.3378	0.000215397	2:3558879:C:A	460	460	25	31	0.322917	9.09255e-05	-0.786711	0.177952	0.00609939	0.00882793	0.102808	9.28141e-05	0.143546	FALSE
ENSG00000287126.1	184	1.03511	37.3883	30.802	0.0733107	2:3525247:G:A	-49853	-49853	26	37	0.614583	0.0560205	-0.379719	0.192117	0.934307	0.938104	0.701897	0.000121631	0.980029	FALSE
ENSG00000171863.15	183	1.01131	38.4431	31.6863	0.0420647	2:3559766:C:CT	-15496	-15496	10	13	0.135417	0.0325076	0.385229	0.173013	0.80472	0.805146	0.669833	0.000103128	0.935259	FALSE
ENSG00000188765.7	78	1.0304	18.4317	34.0146	0.0523123	2:3665311:TTTTTAAATT:T	47554	47554	14	15	0.15625	0.0489685	0.512199	0.251096	0.620538	0.615686	0.615606	0.000240117	0.859544	FALSE
ENSG00000205837.7	62	0.999111	23.7434	34.8553	0.12156	2:6820240:G:A	49929	49929	31	42	0.4375	0.120778	0.256086	0.161038	0.954005	0.953995	0.705683	0.000155261	0.985316	FALSE
ENSG00000225964.6	155	1.03911	53.6062	32.5978	0.00576606	2:6863917:C:G	23453	23453	7	11	0.885417	0.00420728	0.53567	0.174936	0.251175	0.249638	0.459526	8.67765e-05	0.641616	FALSE
ENSG00000134321.13	200	1.04037	72.5854	32.4299	0.0135203	2:6836059:T:C	-29498	-29498	33	44	0.541667	0.0102526	0.364885	0.134457	0.611939	0.610316	0.614085	6.45473e-05	0.857421	FALSE
ENSG00000134326.12	203	1.0515	68.6421	31.6919	0.00446263	2:6838001:T:C	-28634	-28634	28	37	0.614583	0.00278648	0.375482	0.116706	0.245975	0.242327	0.456036	7.25927e-05	0.636743	FALSE
ENSG00000151692.15	191	1.03544	67.0788	32.0832	0.00516082	2:6896707:G:C	-20705	-20705	30	37	0.614583	0.00346626	0.465211	0.14837	0.279072	0.277353	0.474553	6.79366e-05	0.662599	FALSE
ENSG00000228203.8	190	1.02612	69.0849	32.3809	0.0012212	2:6898420:C:G	-20314	-20314	30	38	0.604167	0.000768182	0.775397	0.210418	0.0727927	0.0750144	0.294382	6.25569e-05	0.411032	FALSE
ENSG00000287119.1	26	0.989487	9.5397	35.7003	0.000322726	2:7671301:T:C	-29	-29	4	7	0.0729167	0.000370275	0.856338	0.217295	0.00309969	0.00327989	0.0585194	0.000364557	0.0817082	FALSE
ENSG00000235576.3	90	1.01391	21.5204	31.8524	0.000632685	2:7706936:T:C	-18746	-18746	10	15	0.15625	0.000337707	0.511108	0.128651	0.0122988	0.0126707	0.125467	0.000187027	0.175184	FALSE
ENSG00000236790.7	121	1.03985	47.6356	32.7084	0.0190157	2:8532541:TG:T	44257	44257	19	26	0.270833	0.0152165	0.378038	0.148108	0.591041	0.581625	0.60535	9.80534e-05	0.845224	FALSE
ENSG00000236008.5	38	1.02207	15.5609	33.7129	0.0275827	2:8543228:T:C	-49675	-49675	5	9	0.09375	0.0247399	0.505428	0.215396	0.350465	0.342566	0.511247	0.00027115	0.713832	FALSE
ENSG00000115738.10	61	1.02596	23.4236	32.3119	0.0325963	2:8693396:C:A	14551	14551	4	7	0.0729167	0.0260515	0.37269	0.160361	0.530647	0.527836	0.58645	0.000184256	0.818836	FALSE
ENSG00000235092.7	62	1.01597	23.2686	32.1727	0.0119241	2:8682782:A:C	918	918	8	11	0.114583	0.00868645	-0.631684	0.227215	0.238876	0.236821	0.45245	0.000175076	0.631737	FALSE
ENSG00000134313.17	128	1.0313	44.4302	31.6866	0.0822081	2:8789629:G:C	-48001	-48001	4	7	0.0729167	0.0675527	-0.229506	0.12166	0.974803	0.976408	0.711432	0.000100177	0.993343	FALSE
ENSG00000143797.12	48	1.02857	14.914	31.848	0.00244839	2:8995593:AT:A	-8119	-8119	9	12	0.125	0.00148182	0.485286	0.140683	0.0283972	0.032284	0.20091	0.00029362	0.280523	FALSE
ENSG00000151693.11	31	0.997205	7.58598	34.4465	0.0850768	2:9194578:G:A	-12187	-12187	8	11	0.114583	0.0825749	0.383633	0.214661	0.491851	0.491891	0.573427	0.000480378	0.800651	FALSE
ENSG00000213772.3	89	0.986824	4.39983	35.3384	0.177739	2:9270956:C:T	-672	-672	4	7	0.0729167	0.179858	0.420679	0.307388	0.579042	0.582823	0.605828	0.000778091	0.845892	FALSE
ENSG00000119185.13	107	1.01236	34.8967	32.2665	0.00228983	2:9463815:G:A	40287	40287	3	6	0.0625	0.00148169	0.727081	0.210776	0.0734927	0.0741222	0.293776	0.000114311	0.410187	FALSE
ENSG00000119203.14	107	1.04087	34.1956	31.6241	0.0425234	2:9466341:C:CA	42690	42690	3	5	0.0520833	0.0327211	-0.554398	0.249317	0.766223	0.76065	0.657998	0.000137347	0.918735	FALSE
ENSG00000134330.19	211	1.04816	48.7594	30.7256	0.0534553	2:9440411:G:GT	-33247	-33247	7	10	0.104167	0.0390927	0.431111	0.201116	0.923408	0.925183	0.699278	0.000100319	0.976373	FALSE
ENSG00000239300.6	224	1.03289	50.4051	30.7821	0.00541699	2:9480601:C:T	-20865	-20865	7	9	0.09375	0.00299359	1.02381	0.320888	0.229577	0.225826	0.444933	8.9107e-05	0.621241	FALSE
ENSG00000271855.1	145	1.03368	38.9738	31.4472	0.023709	2:9581486:C:CTCA	25587	25587	5	8	0.0833333	0.0169377	-0.83954	0.334772	0.59934	0.592687	0.607996	0.000115747	0.848919	FALSE
ENSG00000151694.15	144	1.05514	37.0371	30.5089	0.00132005	2:9527284:C:CAAAGA	-29449	-29449	8	12	0.125	0.000574527	0.626622	0.165444	0.0375962	0.039461	0.222544	0.00013719	0.310729	FALSE
ENSG00000134308.14	65	1.02828	22.6793	33.0007	0.0380877	2:9599096:A:G	-31901	-31901	5	10	0.104167	0.0326207	0.366878	0.164886	0.575142	0.572883	0.602806	0.000192839	0.841673	FALSE
ENSG00000115750.17	78	1.03085	21.574	33.0007	0.0243293	2:9864789:A:G	21346	21346	8	15	0.15625	0.020336	0.357825	0.147214	0.40366	0.397451	0.534847	0.000205696	0.746784	FALSE
ENSG00000269973.1	85	1.02564	31.5821	32.2131	0.0754456	2:9906730:T:G	-29630	-29630	3	6	0.0625	0.0637126	-0.491758	0.256812	0.912509	0.912228	0.696291	0.00013643	0.972201	FALSE
ENSG00000134317.18	93	1.03225	33.4285	32.1467	0.00294832	2:9919715:C:T	-31978	-31978	9	12	0.125	0.00190836	-0.814911	0.242731	0.0814919	0.0859886	0.310373	0.000133849	0.43336	FALSE
ENSG00000260077.1	96	1.01157	33.2333	33.0155	0.00816553	2:10035315:C:A	-5348	-5348	7	9	0.09375	0.00643731	-0.825026	0.28467	0.237576	0.233646	0.451059	0.000119474	0.629795	FALSE
ENSG00000172059.11	90	1.04618	30.6392	31.6959	0.00167111	2:10030327:C:T	-12522	-12522	4	5	0.0520833	0.000948529	-1.04401	0.289197	0.039996	0.0426848	0.232651	0.000157863	0.324841	FALSE
ENSG00000171848.16	35	1.01738	15.9617	34.214	0.00306052	2:10133703:AT:A	13005	13005	4	7	0.0729167	0.00273637	-0.78245	0.242689	0.0424958	0.0449869	0.237482	0.000257274	0.331585	FALSE
ENSG00000285872.3	173	1.01287	64.271	32.9785	0.00114318	2:10312388:GTCA:G	9903	9903	30	48	0.5	0.000801363	-0.520948	0.141946	0.0651935	0.0681518	0.282816	6.22595e-05	0.394884	FALSE
ENSG00000115756.13	173	1.00647	66.9062	33.3351	0.00577495	2:10325549:GCT:G	22660	22660	17	27	0.71875	0.00466393	-0.374785	0.123988	0.320868	0.318219	0.500054	5.75852e-05	0.698204	FALSE
ENSG00000115758.14	217	1.02125	57.663	31.0433	0.0199795	2:10443896:T:C	-4431	-4431	8	9	0.09375	0.0134066	0.70067	0.268999	0.683032	0.679342	0.633673	7.28705e-05	0.884771	FALSE
ENSG00000257135.8	217	1.00635	62.0185	32.0147	0.0111029	2:10432727:A:C	-15927	-15927	19	26	0.270833	0.0078853	0.540883	0.191905	0.49745	0.496594	0.574594	6.20788e-05	0.802282	FALSE
ENSG00000115761.17	85	1.03678	25.6428	31.9289	0.0126681	2:10652239:CAA:C	-37748	-37748	4	5	0.0520833	0.00900485	-0.735222	0.265829	0.273573	0.262755	0.466135	0.000178974	0.650844	FALSE
ENSG00000272275.1	114	1.03211	43.7151	32.3703	0.00110616	2:10768434:G:A	-1624	-1624	19	27	0.28125	0.000689153	-0.614864	0.165133	0.0414959	0.0422612	0.231925	0.000102285	0.323826	FALSE
ENSG00000143870.13	106	1.01217	38.3717	33.8273	0.00493507	2:10790777:T:C	-47200	-47200	27	36	0.375	0.00423307	-0.414811	0.13557	0.169683	0.168495	0.399725	0.000103845	0.558119	FALSE
ENSG00000150873.12	126	1.02957	35.4638	31.9036	0.0045	2:11129925:C:G	-3203	-3203	3	6	0.0625	0.00290623	0.761735	0.237922	0.136386	0.138127	0.375095	0.000124264	0.523729	FALSE
ENSG00000162976.13	146	1.03719	43.5983	31.6197	0.0113588	2:11160743:T:C	5545	5545	10	16	0.833333	0.00769104	0.275786	0.0975078	0.385261	0.374499	0.52558	0.000105543	0.733844	FALSE
ENSG00000134318.16	84	1.00443	17.526	33.2472	0.0362312	2:11314004:C:T	-34326	-34326	3	6	0.0625	0.0315852	0.459641	0.205253	0.479652	0.47415	0.567036	0.000217138	0.791728	FALSE
ENSG00000224177.8	80	0.986205	11.8689	32.607	0.0550724	2:11417234:T:TCAAC	44622	44622	4	5	0.0520833	0.0467585	0.690832	0.335135	0.49955	0.496018	0.574346	0.000287158	0.801934	FALSE
ENSG00000169016.17	27	0.996189	8.65639	34.916	0.0339738	2:11446093:A:G	-20084	-20084	27	35	0.364583	0.0337567	-0.349065	0.157965	0.263974	0.260228	0.465194	0.000418416	0.649531	FALSE
ENSG00000134324.12	3	1.01454	2.0389	35.1134	0.069557	2:11628918:C:T	-48677	-48677	9	10	0.104167	0.0700157	0.259352	0.138768	0.131687	0.132455	0.369958	0.00197377	0.516557	FALSE
ENSG00000071575.12	103	0.997381	28.0023	32.5999	0.00132024	2:12724640:C:T	7730	7730	25	32	0.333333	0.000870442	-0.28977	0.0795931	0.0355964	0.0366729	0.214082	0.000130281	0.298913	FALSE
ENSG00000151779.14	106	1.00493	41.2197	35.4801	0.0375712	2:15560748:T:C	-592	-592	3	6	0.0625	0.0389052	-0.494185	0.230305	0.791321	0.792247	0.666533	9.26123e-05	0.930651	FALSE
ENSG00000079785.16	137	1.02749	38.7257	32.9515	0.0553075	2:15622867:A:G	31689	31689	6	7	0.0729167	0.0481557	0.428849	0.209434	0.884812	0.884431	0.689639	0.000112458	0.962914	FALSE
ENSG00000197872.11	206	1.03861	64.0809	31.3699	0.00125641	2:16617207:C:T	-49124	-49124	27	41	0.572917	0.000649578	0.43222	0.115434	0.0674933	0.0690273	0.284544	7.23935e-05	0.397296	FALSE
ENSG00000178295.15	70	1.02029	21.1299	32.4169	0.123777	2:17757234:A:G	3376	3376	3	6	0.0625	0.109563	-0.434555	0.264662	0.937106	0.93642	0.701674	0.000197687	0.979718	FALSE
ENSG00000163029.16	45	1.02917	17.1743	32.0914	0.0277215	2:17798725:T:C	-1517	-1517	4	6	0.0625	0.0214332	0.412407	0.171249	0.373963	0.369149	0.523546	0.000255885	0.731005	FALSE
ENSG00000240857.2	33	1.01687	9.79845	33.9673	0.15866	2:18558967:G:A	-1712	-1712	10	17	0.177083	0.152382	-0.273147	0.186699	0.809719	0.81154	0.671595	0.000417691	0.93772	FALSE
ENSG00000228784.9	176	1.02779	62.3697	32.1226	0.00794901	2:19878810:G:A	9950	9950	15	21	0.21875	0.00556629	-0.437453	0.148055	0.387561	0.378734	0.527335	6.99568e-05	0.736296	FALSE
ENSG00000183891.6	180	1.02822	59.5045	31.3211	0.0254676	2:19876242:A:T	-25741	-25741	11	17	0.177083	0.0180904	-0.346676	0.13978	0.776422	0.775799	0.66211	7.3505e-05	0.924476	FALSE
ENSG00000118965.16	77	1.02708	29.031	32.5287	0.0145954	2:19957438:C:T	-32667	-32667	4	7	0.0729167	0.0112545	0.608535	0.227395	0.341466	0.334721	0.508468	0.000149641	0.709952	FALSE
ENSG00000068697.7	67	1.00362	31.2441	33.4478	0.0368602	2:20018377:T:C	-33251	-33251	12	16	0.166667	0.0326881	0.268466	0.120707	0.690231	0.68929	0.636537	0.000121226	0.88877	FALSE
ENSG00000115884.11	136	1.03894	23.0392	30.1313	0.0341218	2:20205001:C:T	-20432	-20432	5	7	0.0729167	0.0222548	0.648287	0.271008	0.537446	0.532741	0.587828	0.000201606	0.820759	FALSE
ENSG00000055917.17	111	1.00952	24.9358	31.329	0.0255656	2:20313835:CA:C	-38399	-38399	6	8	0.0833333	0.0181823	0.479086	0.193334	0.471653	0.471181	0.56528	0.000157305	0.789277	FALSE
ENSG00000143878.10	143	1.02165	42.9482	32.0231	0.0444416	2:20406363:G:A	-40711	-40711	3	6	0.0625	0.0354984	-0.553663	0.253138	0.852815	0.853143	0.683226	9.80565e-05	0.95396	FALSE
ENSG00000118960.13	294	1.02518	87.3444	32.1862	0.000257934	2:20630919:C:T	-20211	-20211	9	14	0.145833	0.000137331	-0.345721	0.0807511	0.0193981	0.0200327	0.159993	4.9215e-05	0.223392	FALSE
ENSG00000143869.7	226	1.00807	67.9341	32.4336	0.000807306	2:20624098:C:T	-43046	-43046	9	13	0.135417	0.000497289	0.700336	0.182468	0.0520948	0.0519703	0.252529	5.72559e-05	0.352595	FALSE
ENSG00000118961.15	27	0.956089	4.75604	36.3209	0.0251359	2:20819870:G:A	-3260	-3260	9	14	0.145833	0.0279743	0.325981	0.142166	0.128187	0.12704	0.363864	0.000593624	0.508047	FALSE
ENSG00000283031.2	152	1.05724	37.8862	30.8884	0.00243397	2:23710262:T:C	24809	24809	28	47	0.510417	0.00123843	0.573364	0.163148	0.070293	0.0749918	0.294382	0.000135656	0.411032	FALSE
ENSG00000119778.15	68	1.019	25.503	32.3562	0.00957837	2:23927579:T:TA	456	456	15	18	0.1875	0.00701779	-0.340518	0.118879	0.214479	0.210025	0.435515	0.000162585	0.608091	FALSE
ENSG00000173960.14	68	1.02771	25.5777	32.2709	0.00947805	2:23879927:G:A	-47358	-47358	3	6	0.0625	0.00686367	0.882794	0.307261	0.207679	0.205172	0.431968	0.000170445	0.603139	FALSE
ENSG00000205639.12	95	1.01135	29.5451	31.9466	0.0190052	2:24045991:C:A	35910	35910	14	17	0.822917	0.0140256	0.421011	0.162794	0.430957	0.427232	0.54704	0.000134211	0.763809	FALSE
ENSG00000163026.12	168	1.0325	48.9561	31.4396	0.0256225	2:24067801:G:A	18226	18226	8	9	0.09375	0.0184355	-0.752325	0.304315	0.711029	0.707402	0.64178	9.15408e-05	0.89609	FALSE
ENSG00000119782.14	168	1.03491	48.9513	31.7122	0.00788346	2:24054839:G:A	5138	5138	4	7	0.0729167	0.00521592	0.595756	0.199933	0.314169	0.305129	0.492619	9.28065e-05	0.687823	FALSE
ENSG00000115128.7	176	1.04444	49.9847	30.9023	0.00193584	2:24087995:G:A	11622	11622	3	5	0.0520833	0.000959726	-0.634382	0.175932	0.080092	0.0815666	0.304222	9.5868e-05	0.424772	FALSE
ENSG00000219626.9	176	1.04212	51.794	31.1116	0.00570159	2:24099471:G:A	22945	22945	9	13	0.135417	0.00333874	-0.766291	0.243298	0.242276	0.23843	0.453522	9.13347e-05	0.633233	FALSE
ENSG00000115129.14	165	1.03818	42.8138	30.0566	0.00158162	2:24085258:T:C	-603	-603	15	19	0.197917	0.000642329	-0.458342	0.122281	0.0568943	0.0581395	0.265959	0.000108075	0.371347	FALSE
ENSG00000198399.16	233	1.00389	11.0542	30.9916	0.0105803	2:24340777:A:G	-19759	-19759	17	25	0.260417	0.00654776	-0.230071	0.0795668	0.110789	0.109835	0.34301	0.000343115	0.47893	FALSE
ENSG00000084676.16	166	1.02118	37.052	30.3008	0.0289693	2:24478776:G:C	-12478	-12478	15	20	0.208333	0.0187879	-0.299925	0.121713	0.658334	0.654897	0.626588	0.000113347	0.874879	FALSE
ENSG00000138092.11	227	1.04363	49.528	30.836	0.0015869	2:24807272:TAGTCTTCTC:T	14136	14136	5	7	0.0729167	0.000757281	0.854557	0.231581	0.0649935	0.0663958	0.279596	9.63174e-05	0.390388	FALSE
ENSG00000184924.6	227	1.00928	48.0519	30.882	0.0295094	2:24810047:C:CA	16656	16656	5	7	0.0729167	0.0203749	-0.476741	0.196204	0.758524	0.759853	0.657787	8.15258e-05	0.91844	FALSE
ENSG00000271936.1	187	1.03498	37.8905	30.5934	0.00707574	2:24820228:C:T	-5382	-5382	5	6	0.0625	0.00393151	-1.03352	0.334704	0.224178	0.221489	0.443001	0.000119931	0.618543	FALSE
ENSG00000138031.15	42	1.04004	17.4433	33.5032	0.000373245	2:24918669:A:G	-1568	-1568	29	43	0.552083	0.000274709	0.52029	0.128652	0.00379962	0.00521997	0.075573	0.000267842	0.105519	FALSE
ENSG00000224165.8	43	1.01694	18.0196	34.8248	0.0190171	2:24960631:C:A	-10759	-10759	5	8	0.0833333	0.0187144	-0.498448	0.20214	0.287571	0.284879	0.479536	0.000227327	0.669556	FALSE
ENSG00000115137.12	43	1.02315	17.0326	33.8595	0.000626048	2:24936632:G:C	-35462	-35462	20	26	0.270833	0.000505156	0.6254	0.163177	0.00759924	0.00946228	0.107353	0.000249284	0.149893	FALSE
ENSG00000115138.11	101	1.00862	19.5759	31.5071	0.014842	2:25161300:G:A	-7603	-7603	8	9	0.09375	0.0101786	-0.646917	0.238127	0.257674	0.250066	0.459948	0.000199299	0.642207	FALSE
ENSG00000119772.19	132	1.0317	62.6886	32.687	0.0341849	2:25316488:G:A	-26102	-26102	23	34	0.354167	0.0283341	-0.272054	0.118939	0.879812	0.880935	0.689057	7.11699e-05	0.962101	FALSE
ENSG00000235072.2	93	1.03199	48.5247	33.3255	0.00040876	2:25364439:C:T	-11406	-11406	6	8	0.0833333	0.000290837	-0.784945	0.195043	0.0141986	0.0170928	0.145267	9.20875e-05	0.20283	FALSE
ENSG00000224220.1	64	1.01964	41.7807	34.6029	0.0173088	2:25435733:T:G	14616	14616	3	6	0.0625	0.0166707	-0.659642	0.262342	0.515348	0.508553	0.578748	9.96289e-05	0.808081	FALSE
ENSG00000138101.20	36	0.936113	5.6414	35.2898	0.0260301	2:25720505:A:G	46858	46858	8	15	0.15625	0.026659	-0.301781	0.130414	0.167783	0.15984	0.393011	0.000438273	0.548744	FALSE
ENSG00000217643.1	151	1.03974	42.9767	32.3738	0.0320254	2:25807990:TACAC:T	-14483	-14483	5	7	0.0729167	0.025705	-0.726019	0.31161	0.741426	0.739632	0.652295	0.000108611	0.910772	FALSE
ENSG00000143970.18	183	1.00945	29.3005	31.5441	0.0681709	2:25904331:C:CAAAAAA	25841	25841	13	17	0.177083	0.0545203	-0.256165	0.128767	0.868113	0.871719	0.68758	0.000133822	0.960039	FALSE
ENSG00000084731.15	71	1.00666	14.9423	32.4293	0.00486652	2:25992987:C:T	10238	10238	16	21	0.21875	0.00342431	-0.533173	0.169796	0.0666933	0.0688975	0.284422	0.000258068	0.397127	FALSE
ENSG00000084733.11	146	0.999638	29.8637	31.5448	0.01914	2:25997301:CTTTTTTT:C	-36783	-36783	7	8	0.0833333	0.0135239	0.325835	0.125266	0.440256	0.438671	0.550883	0.000123836	0.769174	FALSE
ENSG00000214465.3	193	1.01801	31.7848	30.238	0.0281629	2:26102379:A:G	-46825	-46825	11	12	0.125	0.0180713	-0.805431	0.324692	0.592941	0.588675	0.606814	0.000129715	0.847268	FALSE
ENSG00000157833.13	172	1.00669	27.285	30.4519	0.023864	2:26174550:G:T	1462	1462	4	5	0.0520833	0.0153207	0.783851	0.307438	0.486251	0.479434	0.568984	0.000141375	0.794448	FALSE
ENSG00000138029.14	124	1.01777	42.1085	32.4365	0.0166475	2:26241540:A:G	-1630	-1630	26	36	0.375	0.0128247	0.276163	0.105288	0.507549	0.498367	0.575181	9.77846e-05	0.803101	FALSE
ENSG00000084754.12	123	1.01833	41.0706	32.0287	0.0110773	2:26229737:G:A	-14935	-14935	4	7	0.0729167	0.00787938	0.402126	0.142659	0.362064	0.358375	0.517565	0.000100582	0.722654	FALSE
ENSG00000286707.1	91	1.01466	41.1802	33.2824	0.0119835	2:26262718:A:G	-35852	-35852	14	20	0.208333	0.00994944	-0.502112	0.184204	0.389461	0.384248	0.529707	9.81886e-05	0.739607	FALSE
ENSG00000138018.19	81	1.05808	43.7338	33.1786	0.00432715	2:26345635:G:A	37088	37088	5	6	0.0625	0.00337148	0.897713	0.285357	0.152685	0.152568	0.38708	0.000118066	0.540463	FALSE
ENSG00000173567.16	83	1.03616	44.353	33.7248	0.016803	2:26369929:A:G	23112	23112	3	5	0.0520833	0.0148333	-0.846992	0.330466	0.516548	0.51141	0.579511	0.000103148	0.809147	FALSE
ENSG00000157856.12	64	1.02648	31.9555	33.8913	0.0192723	2:26369929:A:G	-31991	-31991	3	5	0.0520833	0.0173718	-0.541291	0.21676	0.454455	0.450328	0.557382	0.000135487	0.778249	FALSE
ENSG00000115155.19	18	0.946887	2.70837	38.81	0.00891025	2:26517534:A:G	-41222	-41222	24	37	0.385417	0.0130622	0.364471	0.139356	0.0328967	0.0295683	0.191141	0.00098529	0.266882	FALSE
ENSG00000115163.15	60	0.990464	14.9654	32.0643	0.00892206	2:26793101:G:A	28812	28812	3	6	0.0625	0.00625952	-0.850501	0.292358	0.132287	0.128461	0.364847	0.00023375	0.50942	FALSE
ENSG00000084764.12	40	1.00343	7.54902	32.2345	0.175604	2:26964386:G:A	-6251	-6251	3	6	0.0625	0.157897	-0.385323	0.26702	0.762524	0.766189	0.65941	0.000500985	0.920706	FALSE
ENSG00000119777.20	58	1.00001	19.4186	31.8574	0.00844473	2:27073282:A:G	40372	40372	5	7	0.0729167	0.00573589	-0.587908	0.199761	0.151785	0.151832	0.386673	0.000190866	0.539895	FALSE
ENSG00000084693.16	57	1.01381	20.7304	32.1523	0.0353894	2:27056952:T:C	14588	14588	5	7	0.927083	0.0280606	0.631949	0.275767	0.526447	0.519723	0.583762	0.000194038	0.815082	FALSE
ENSG00000272148.1	59	1.00674	21.4837	32.0317	0.121085	2:27046426:G:GT	-16481	-16481	30	47	0.489583	0.104902	-0.23159	0.139118	0.935206	0.93675	0.701734	0.000179595	0.979801	FALSE
ENSG00000228474.6	65	1.00982	21.6972	32.273	0.00596259	2:27070282:G:T	-1372	-1372	27	41	0.427083	0.00416551	-0.28085	0.0916048	0.119488	0.118766	0.354527	0.000181098	0.495011	FALSE
ENSG00000138080.14	63	1.02031	20.27	32.0113	0.0598841	2:27068793:G:A	-9822	-9822	28	42	0.5625	0.0489734	-0.344756	0.169014	0.710629	0.706532	0.641648	0.000206092	0.895905	FALSE
ENSG00000138030.14	75	1.01424	23.5401	32.1396	0.00048852	2:27066047:C:T	-20725	-20725	26	35	0.635417	0.000271505	-0.781382	0.19302	0.010399	0.0106697	0.113457	0.000171317	0.158415	FALSE
ENSG00000143994.14	69	0.999373	16.8636	32.1903	0.0783971	2:27131111:T:TA	7322	7322	15	18	0.1875	0.066298	-0.551733	0.291063	0.743026	0.747816	0.654748	0.000218942	0.914197	FALSE
ENSG00000138073.14	83	1.02237	18.2	31.6703	0.0137629	2:27131551:C:T	-3115	-3115	8	11	0.114583	0.00955409	0.473621	0.172722	0.219278	0.213913	0.43873	0.000232261	0.61258	FALSE
ENSG00000138085.18	203	0.992423	21.3795	31.5978	0.0491467	2:27219036:A:G	6995	6995	4	7	0.0729167	0.0382563	0.331302	0.15385	0.661734	0.662611	0.628638	0.000165582	0.877741	FALSE
ENSG00000138074.15	204	0.980017	21.7023	31.9257	0.00226808	2:27221753:ATTTTT:A	8795	8795	19	22	0.229167	0.00138181	-0.626347	0.180253	0.0507949	0.0514821	0.251505	0.0001511	0.351166	FALSE
ENSG00000084774.14	205	0.994167	21.9439	31.522	0.0159145	2:27255363:A:G	37994	37994	7	10	0.104167	0.0110105	-0.748327	0.278708	0.30087	0.299414	0.489138	0.000163044	0.682963	FALSE
ENSG00000163794.6	105	1.01752	23.3278	31.6325	0.0428559	2:27263727:G:C	-44718	-44718	6	9	0.09375	0.0330247	0.459709	0.207118	0.637736	0.632706	0.620124	0.000176216	0.865853	FALSE
ENSG00000115204.15	115	1.01628	28.8203	31.0335	0.018257	2:27374471:C:A	48791	48791	3	6	0.0625	0.0121099	0.583682	0.220562	0.410859	0.404149	0.53714	0.000141619	0.749986	FALSE
ENSG00000234072.1	117	1.01464	38.3347	31.7916	0.0424228	2:27361474:T:G	5228	5228	4	5	0.0520833	0.033105	0.827813	0.373147	0.80462	0.806072	0.670083	0.000105463	0.935608	FALSE
ENSG00000115207.15	117	1.03835	36.4739	30.8527	0.0516055	2:27360272:TA:T	3273	3273	16	21	0.21875	0.0379796	-0.315546	0.146309	0.847815	0.846345	0.680964	0.000126971	0.950801	FALSE
ENSG00000115211.17	118	0.97933	40.9097	32.9723	0.0407354	2:27383231:A:G	12893	12893	7	9	0.90625	0.0349353	0.438123	0.199656	0.821718	0.82318	0.674133	7.97992e-05	0.941263	FALSE
ENSG00000115234.11	118	1.02335	38.6801	31.8934	0.0152437	2:27400316:C:T	29820	29820	3	5	0.0520833	0.0109682	-0.539071	0.200656	0.447755	0.4367	0.549743	0.000109946	0.767583	FALSE
ENSG00000163795.14	124	1.03743	40.169	31.6647	0.0212452	2:27395145:CACT:C	14355	14355	10	17	0.177083	0.0153643	-0.37078	0.145493	0.564644	0.561003	0.599178	0.000114703	0.836607	FALSE
ENSG00000115241.11	111	1.01159	35.0339	32.3708	0.0102325	2:27360289:G:A	-49302	-49302	30	43	0.447917	0.00754812	-0.245136	0.0864451	0.30237	0.297248	0.487029	0.000113348	0.680018	FALSE
ENSG00000115216.14	86	1.01723	28.3767	32.8966	0.0764616	2:27455604:A:G	27814	27814	4	7	0.0729167	0.0675221	-0.238768	0.126555	0.886811	0.892302	0.691488	0.00014463	0.965496	FALSE
ENSG00000157992.12	72	0.997564	21.4486	32.9386	0.152227	2:27455604:A:G	13238	13238	4	7	0.0729167	0.139813	0.429729	0.284436	0.972003	0.971187	0.710137	0.000170276	0.991534	FALSE
ENSG00000138002.16	28	1.00282	8.98166	33.5562	0.0405429	2:27469347:T:C	-20458	-20458	3	5	0.0520833	0.0364019	-0.465975	0.214154	0.317268	0.30918	0.494854	0.000419582	0.690944	FALSE
ENSG00000198522.14	108	1.04505	40.2467	31.7917	0.0154906	2:27616965:C:G	-11282	-11282	16	25	0.260417	0.0110311	0.366726	0.136623	0.451255	0.444944	0.553982	0.000119453	0.773502	FALSE
ENSG00000176714.10	104	1.05537	39.2039	31.7934	0.024993	2:27625719:A:C	-3293	-3293	21	34	0.354167	0.0185975	0.388402	0.157343	0.613939	0.605604	0.612423	0.000129776	0.855101	FALSE
ENSG00000163798.14	70	0.973342	26.0473	33.0844	0.00126361	2:27672335:T:TTTC	8909	8909	5	5	0.0520833	0.000908348	-1.75511	0.484108	0.0341966	0.0358687	0.211851	0.000120712	0.295798	FALSE
ENSG00000119760.16	70	1.00992	24.4344	31.7531	0.0303732	2:27637684:A:G	-26156	-26156	24	33	0.34375	0.0229159	-0.337672	0.141905	0.523648	0.52471	0.586058	0.000160912	0.818288	FALSE
ENSG00000243147.8	61	0.992259	8.33531	32.7255	0.146708	2:27794925:A:G	23208	23208	3	6	0.0625	0.133205	-0.384792	0.250299	0.736326	0.736133	0.651618	0.000424343	0.909827	FALSE
ENSG00000158019.21	32	1.01491	11.0455	35.3552	0.11589	2:27840089:A:G	-49852	-49852	4	5	0.0520833	0.117764	0.356507	0.2223	0.738626	0.738471	0.651973	0.00036638	0.910322	FALSE
ENSG00000171174.15	32	1.02672	12.2865	35.114	0.062187	2:27940623:C:CAGTTTGCTA	49942	49942	3	6	0.0625	0.0626191	-0.592408	0.30803	0.538846	0.533478	0.588132	0.000352598	0.821184	FALSE
ENSG00000075426.12	189	1.044	61.2295	30.9855	0.0626798	2:28427260:T:G	34812	34812	21	31	0.322917	0.0476829	-0.176103	0.0858095	0.977102	0.979167	0.71214	7.80779e-05	0.994331	FALSE
ENSG00000229951.6	189	1.02877	59.5202	31.361	0.0138356	2:28387928:A:G	-6752	-6752	11	15	0.15625	0.00925432	0.595319	0.216098	0.554845	0.550389	0.594919	7.37168e-05	0.83066	FALSE
ENSG00000270210.1	125	1.00969	35.0241	31.1573	0.0245043	2:28394145:C:A	-31800	-31800	5	6	0.0625	0.0170392	-0.629365	0.251214	0.576842	0.576218	0.6036	0.000112116	0.84278	FALSE
ENSG00000163803.13	80	0.991979	33.7439	32.9847	0.00158635	2:28490549:A:G	33404	33404	3	6	0.0625	0.00113455	0.718512	0.202632	0.0550945	0.0535815	0.255697	0.000104622	0.357019	FALSE
ENSG00000213639.11	182	1.03599	41.8493	30.5404	0.0164393	2:28763702:CGTTA:C	12062	12062	11	17	0.177083	0.0101453	-0.336689	0.123873	0.492351	0.483151	0.570914	0.000109212	0.797143	FALSE
ENSG00000226833.7	182	1.00509	40.8259	30.7628	0.016932	2:28737099:CAGCTCACTG:C	-14623	-14623	3	6	0.0625	0.010778	0.685389	0.254449	0.49975	0.499575	0.575465	9.35948e-05	0.803497	FALSE
ENSG00000163806.16	182	1.03592	45.2083	30.7826	0.0125824	2:28809900:C:A	27383	27383	4	8	0.0833333	0.00773577	0.596594	0.211105	0.424858	0.418544	0.542903	0.000101061	0.758032	FALSE
ENSG00000171103.11	122	1.02046	36.1627	32.5573	0.0446815	2:28830200:CTT:C	-40109	-40109	4	6	0.0625	0.0372789	0.616556	0.284766	0.80052	0.802725	0.669255	0.00011565	0.934453	FALSE
ENSG00000163811.12	137	1.0008	43.7738	33.3903	0.0355699	2:28921646:C:T	26979	26979	4	7	0.0729167	0.0313495	0.29662	0.13226	0.792721	0.794894	0.667001	8.50786e-05	0.931305	FALSE
ENSG00000189350.13	127	1.03661	42.0812	33.3615	0.00364146	2:28952274:G:A	-4337	-4337	28	48	0.5	0.00288976	-0.352976	0.110176	0.134487	0.130653	0.368161	0.00010899	0.514047	FALSE
ENSG00000115295.21	42	1.00822	16.9487	31.9781	0.0102139	2:29142060:C:T	44355	44355	11	15	0.15625	0.00716865	0.324857	0.113744	0.160684	0.156853	0.390276	0.000229637	0.544926	FALSE
ENSG00000119801.13	128	0.995018	18.1474	30.8047	0.0199088	2:30155018:T:C	8077	8077	20	31	0.677083	0.0129948	0.295264	0.112803	0.315268	0.308052	0.494328	0.000198176	0.690209	FALSE
ENSG00000213626.13	164	1.05093	44.796	31.4424	0.0455373	2:30261285:C:A	29751	29751	3	6	0.0625	0.0347344	-0.218567	0.0994855	0.863114	0.865507	0.686372	0.000110865	0.958351	FALSE
ENSG00000172954.14	28	1.03463	23.7875	35.1604	0.0126405	2:30447348:C:A	122	122	5	8	0.0833333	0.0128476	0.488046	0.186122	0.251775	0.246298	0.45892	0.000190601	0.64077	FALSE
ENSG00000285984.1	74	1.02862	25.8982	33.7304	0.000574861	2:30911073:G:C	13686	13686	5	8	0.0833333	0.000450942	-0.814962	0.210458	0.010099	0.0129497	0.126246	0.000169213	0.176272	FALSE
ENSG00000158089.15	56	1.04307	24.8672	33.4843	0.033671	2:31135077:C:G	-20125	-20125	3	6	0.0625	0.0298388	0.35349	0.156096	0.560944	0.553897	0.596364	0.000191148	0.832677	FALSE
ENSG00000013016.16	134	1.00905	33.8786	32.062	0.0108831	2:31234288:GGGGACCCCG:G	136	136	23	35	0.635417	0.00776196	0.434649	0.153873	0.307969	0.30559	0.49278	0.000115469	0.688048	FALSE
ENSG00000273165.1	97	1.0228	31.4854	31.9891	0.0403101	2:31880971:C:A	27548	27548	5	7	0.0729167	0.0318479	-0.583104	0.260814	0.719328	0.718014	0.645757	0.000134632	0.901643	FALSE
ENSG00000162961.14	111	1.02522	49.3501	33.998	0.0221786	2:31993611:T:C	-46194	-46194	3	5	0.0520833	0.0202741	-0.742224	0.305198	0.663134	0.659191	0.627747	8.7114e-05	0.876497	FALSE
ENSG00000288937.2	111	1.03658	47.0445	33.4259	0.00437338	2:31993611:T:C	-46228	-46228	3	5	0.0520833	0.00353203	1.13817	0.36382	0.173883	0.172835	0.403753	9.74798e-05	0.563743	FALSE
ENSG00000021574.14	107	1.02797	48.9114	33.0508	0.00125599	2:32080600:T:TA	17044	17044	3	5	0.0520833	0.000897051	-0.607276	0.167297	0.0512949	0.0544752	0.258301	8.92915e-05	0.360655	FALSE
ENSG00000272716.2	147	1.02665	56.1927	33.1353	0.0473465	2:32146040:G:T	-19717	-19717	4	7	0.0729167	0.0414464	0.649718	0.306914	0.932007	0.931238	0.700499	7.71395e-05	0.978077	FALSE
ENSG00000152683.14	148	1.03136	53.0531	32.6096	0.0226143	2:32180410:C:CA	14569	14569	8	12	0.125	0.0181183	0.341806	0.137853	0.69803	0.690896	0.636858	8.39291e-05	0.889218	FALSE
ENSG00000289727.1	164	1.02422	52.9992	31.8623	0.0525276	2:32198232:A:G	-35154	-35154	3	5	0.0520833	0.04201	0.859715	0.407303	0.937406	0.940082	0.702338	8.06525e-05	0.980645	FALSE
ENSG00000091106.19	150	1.00856	51.4991	31.8401	0.0107445	2:32244544:C:CA	-21188	-21188	5	5	0.0520833	0.00744292	0.414016	0.145715	0.423658	0.422522	0.544852	7.57457e-05	0.760754	FALSE
ENSG00000119820.11	152	1.02354	49.8977	31.3931	0.0164351	2:32326454:A:AT	48550	48550	5	7	0.0729167	0.0112375	0.482573	0.180285	0.559744	0.551763	0.595669	8.53293e-05	0.831707	FALSE
ENSG00000272754.1	88	1.0016	32.1203	32.7794	0.0181917	2:32278457:T:C	-43181	-43181	5	6	0.0625	0.0146247	1.04751	0.407768	0.449455	0.44473	0.553798	0.000116502	0.773244	FALSE
ENSG00000115760.16	80	0.994363	25.9301	32.1792	0.0133661	2:32322276:T:G	-34747	-34747	5	5	0.0520833	0.00983429	0.417359	0.15285	0.30027	0.297131	0.487029	0.000138143	0.680018	FALSE
ENSG00000018699.13	70	1.01194	26.5829	32.3861	0.013968	2:32607177:CTAT:C	-20855	-20855	3	5	0.0520833	0.0105637	-0.673951	0.249452	0.309269	0.306473	0.493068	0.00014968	0.68845	FALSE
ENSG00000049323.16	8	0.9786	2.80814	37.0564	0.526454	2:32983065:T:C	36112	36112	5	8	0.0833333	0.538319	0.178329	0.286949	0.879512	0.880929	0.689057	0.00116047	0.962101	FALSE
ENSG00000152689.18	65	1.02829	18.4753	30.8832	0.00834212	2:33400676:A:G	-35648	-35648	8	12	0.125	0.00494118	0.564739	0.188209	0.131987	0.134314	0.372097	0.000236694	0.519543	FALSE
ENSG00000119812.20	80	1.02056	30.3519	31.9831	0.0161129	2:33567046:T:G	-32301	-32301	6	8	0.0833333	0.0117704	0.714105	0.268671	0.382962	0.37937	0.527598	0.000137862	0.736663	FALSE
ENSG00000150938.10	73	1.01183	13.2721	31.0676	0.000174031	2:36404636:A:G	48858	48858	3	6	0.0625	6.66414e-05	0.745717	0.164781	0.0019998	0.00213752	0.0441516	0.000299515	0.061647	TRUE
ENSG00000273090.1	121	1.02144	48.6586	32.1282	0.0363608	2:36499974:A:T	-13758	-13758	3	6	0.0625	0.0288316	0.615681	0.270072	0.828617	0.829598	0.676118	8.64469e-05	0.944035	FALSE
ENSG00000171055.15	21	0.974065	8.27708	33.1634	0.0580721	2:36599600:A:G	-46487	-46487	30	48	0.5	0.0514524	0.249416	0.123677	0.40336	0.402903	0.536861	0.000381961	0.749596	FALSE
ENSG00000115808.12	134	1.0518	50.0849	32.2816	0.0048547	2:36965723:C:T	-813	-813	4	7	0.0729167	0.00334153	0.617626	0.196116	0.20058	0.196015	0.424921	9.96378e-05	0.5933	FALSE
ENSG00000008869.12	109	1.03502	47.5859	32.4748	0.00954492	2:37065747:T:G	-18625	-18625	3	5	0.0520833	0.00709725	0.721772	0.25237	0.351965	0.349819	0.514131	9.55277e-05	0.717859	FALSE
ENSG00000152133.17	109	1.02884	47.962	32.4054	0.00198764	2:37087668:AGGCCTGGAG:A	3150	3150	3	5	0.0520833	0.00130324	-0.756334	0.216343	0.0830917	0.0839663	0.307044	9.15121e-05	0.428713	FALSE
ENSG00000055332.19	212	1.03131	47.9932	30.5527	0.00795764	2:37206305:A:G	48783	48783	13	16	0.833333	0.00446424	-0.365037	0.120099	0.305569	0.304077	0.492157	9.27481e-05	0.687178	FALSE
ENSG00000218739.10	186	1.01514	52.0384	32.0661	0.00640086	2:37192842:G:T	-3646	-3646	17	21	0.78125	0.00436734	-0.577516	0.189482	0.280672	0.277261	0.474553	7.79233e-05	0.662599	FALSE
ENSG00000115816.15	169	1.06602	55.1687	31.0939	0.0426483	2:37185792:T:G	-45804	-45804	19	22	0.229167	0.0313495	-0.281597	0.125561	0.89581	0.89899	0.693279	9.76927e-05	0.967995	FALSE
ENSG00000003509.16	169	1.01938	55.5066	31.6641	0.00789948	2:37270351:G:GA	38720	38720	21	33	0.65625	0.00519287	-0.501054	0.168055	0.360164	0.34688	0.513393	7.48843e-05	0.716828	FALSE
ENSG00000115825.11	80	1.01624	41.3638	33.4429	0.0520446	2:37371855:A:G	47022	47022	7	9	0.09375	0.0467971	0.344902	0.167349	0.883412	0.887382	0.690428	9.86604e-05	0.964015	FALSE
ENSG00000115828.17	96	1.02312	29.347	33.2625	0.00271147	2:37345663:G:T	2836	2836	3	6	0.0625	0.00209004	-0.454999	0.136889	0.069993	0.0715184	0.288388	0.000144704	0.402663	FALSE
ENSG00000236213.4	61	0.989201	11.5671	32.1689	0.0611952	2:37599981:C:A	37495	37495	9	10	0.104167	0.0507083	-0.498955	0.246578	0.526047	0.523331	0.585687	0.000300116	0.81777	FALSE
ENSG00000290100.1	214	1.02328	44.3542	30.2541	1.02447e-05	2:37600271:C:T	-17057	-17057	10	11	0.114583	2.03004e-06	-0.972816	0.171223	0.00019998	0.000376072	0.0128829	9.58469e-05	0.0179878	TRUE
ENSG00000163171.8	98	1.03853	41.3124	33.659	0.0920216	2:37689362:G:C	-49106	-49106	17	25	0.260417	0.0856965	0.326306	0.184512	0.980102	0.979911	0.712246	0.000112221	0.994479	FALSE
ENSG00000237803.6	77	1.01496	29.2174	33.2865	9.77079e-06	2:37829287:G:A	-46987	-46987	32	44	0.458333	5.7288e-06	0.772567	0.144675	0.00019998	0.000251085	0.0101283	0.000138621	0.0141417	TRUE
ENSG00000115841.21	59	1.01282	22.2649	33.2638	0.0140838	2:37916545:T:C	-6642	-6642	6	10	0.104167	0.0117588	-0.541234	0.2036	0.265073	0.265164	0.467112	0.000179625	0.652209	FALSE
ENSG00000232973.14	68	1.03266	39.1271	33.6616	0.00552081	2:38024044:C:T	-49403	-49403	5	8	0.0833333	0.00464932	-0.778522	0.257452	0.182982	0.182412	0.412775	0.00011463	0.57634	FALSE
ENSG00000138061.12	85	1.03042	45.3317	33.1081	0.000369305	2:38074660:C:G	-35242	-35242	4	6	0.0625	0.000249397	-1.17661	0.288565	0.0125987	0.0144742	0.133812	9.76957e-05	0.186835	FALSE
ENSG00000119787.14	27	1.04704	17.8534	33.7735	0.0528579	2:38332577:C:T	-44708	-44708	3	5	0.0520833	0.0486749	-0.311858	0.152672	0.608539	0.600687	0.610932	0.000272045	0.853019	FALSE
ENSG00000213553.4	65	0.962697	6.89723	33.5993	0.000599383	2:38526372:G:T	44521	44521	17	26	0.270833	0.000458826	0.489168	0.126522	0.0049995	0.00512968	0.0746542	0.000426626	0.104236	FALSE
ENSG00000143889.16	63	1.05698	25.259	31.7107	0.00362371	2:38578454:C:T	-25132	-25132	11	17	0.177083	0.00222404	-0.478963	0.145098	0.0734927	0.0745595	0.293896	0.000203103	0.410355	FALSE
ENSG00000143891.17	69	1.01208	22.2998	32.4902	0.0015268	2:38670774:A:T	4693	4693	3	6	0.0625	0.000996715	0.502478	0.139875	0.029797	0.0319989	0.200061	0.000178566	0.279337	FALSE
ENSG00000115875.19	154	1.02445	40.2933	31.713	0.0157585	2:38733349:A:G	-18145	-18145	4	7	0.0729167	0.0111376	0.367606	0.137149	0.463954	0.460953	0.56152	0.000106217	0.784026	FALSE
ENSG00000152147.11	154	1.04869	40.2252	31.3612	0.00103884	2:38735729:CAGTT:C	-15805	-15805	30	40	0.583333	0.000525068	-0.596683	0.156236	0.0308969	0.0343457	0.208256	0.000121944	0.290779	FALSE
ENSG00000163214.21	88	1.01861	18.4696	32.6116	0.0826234	2:38863686:C:G	-12248	-12248	3	6	0.0625	0.0720139	-0.542851	0.292619	0.789321	0.79121	0.666274	0.000223953	0.93029	FALSE
ENSG00000188010.16	88	1.03343	18.668	32.589	0.0307505	2:38834199:C:T	-41777	-41777	13	19	0.197917	0.0250948	0.39466	0.168634	0.428157	0.42586	0.546481	0.00024118	0.763028	FALSE
ENSG00000269210.3	80	0.988342	27.5506	33.6195	0.0145993	2:38984217:TA:T	23840	23840	11	15	0.84375	0.0126839	-0.50958	0.193946	0.343166	0.338675	0.510171	0.000125318	0.71233	FALSE
ENSG00000115904.15	88	1.00073	21.0367	31.8022	0.0382932	2:39078348:G:T	-45997	-45997	8	13	0.135417	0.0296371	-0.358419	0.158064	0.556044	0.559848	0.598576	0.00017695	0.835767	FALSE
ENSG00000231312.8	29	1.0043	23.1715	35.0291	0.0114907	2:39485028:A:G	48498	48498	7	11	0.114583	0.0115256	-0.580805	0.217819	0.235176	0.233136	0.450504	0.000164117	0.62902	FALSE
ENSG00000011566.15	29	1.03698	21.9718	33.5869	0.157609	2:39485235:T:C	47934	47934	3	5	0.0520833	0.149017	0.239274	0.162164	0.972303	0.975131	0.710873	0.000209083	0.992562	FALSE
ENSG00000138050.15	163	1.01713	25.0899	32.2901	0.0973731	2:39751682:A:AT	-27586	-27586	25	29	0.697917	0.0841834	0.322909	0.181669	0.917708	0.921157	0.698195	0.000163474	0.97486	FALSE
ENSG00000287255.3	125	1.03755	27.4503	30.3179	0.0104593	2:40540408:T:C	28487	28487	7	8	0.0833333	0.00589006	0.560945	0.191268	0.239776	0.234909	0.452008	0.000167922	0.63112	FALSE
ENSG00000183023.19	5	1.01312	4.91348	35.0418	0.359607	2:40566152:G:A	-44901	-44901	3	5	0.0520833	0.359898	0.123209	0.132806	0.884012	0.885866	0.690202	0.000814312	0.9637	FALSE
ENSG00000236533.1	2	1.01004	0.993776	34.6027	0.545165	2:41806009:T:C	-44592	-44592	3	5	0.0520833	0.542833	-0.197662	0.321643	0.540946	0.539617	0.590445	0.00393575	0.824413	FALSE
ENSG00000143924.19	130	1.04609	45.5749	31.7998	0.00205289	2:42205942:A:G	36589	36589	6	10	0.104167	0.00121167	0.511641	0.145259	0.0771923	0.0785151	0.299464	0.000106105	0.418129	FALSE
ENSG00000224875.2	134	1.02028	48.0052	31.9333	0.0427641	2:42148170:T:C	-22131	-22131	4	7	0.0729167	0.0337961	0.629929	0.285134	0.873213	0.873189	0.687692	8.70364e-05	0.960194	FALSE
ENSG00000115944.15	77	0.986207	7.84833	32.2284	0.0591625	2:42378700:T:C	-46388	-46388	13	17	0.177083	0.0491087	-0.410284	0.201266	0.387461	0.38688	0.531105	0.000434363	0.74156	FALSE
ENSG00000057935.14	12	1.00014	2.03391	36.7892	0.315991	2:42444911:C:T	-49658	-49658	4	5	0.0520833	0.328221	-0.273447	0.275776	0.538246	0.538066	0.59002	0.00182217	0.823819	FALSE
ENSG00000162881.7	204	1.04888	62.7755	31.8222	0.0346592	2:42762019:C:T	-2116	-2116	26	32	0.666667	0.0266342	-0.39367	0.170094	0.881812	0.881594	0.689057	7.82393e-05	0.962101	FALSE
ENSG00000288886.2	173	1.02699	64.3476	32.5251	0.0135326	2:42798067:T:C	5768	5768	13	17	0.822917	0.0103761	0.580888	0.214433	0.577042	0.571659	0.602519	6.74972e-05	0.841272	FALSE
ENSG00000162882.15	173	1.02739	67.4304	32.8824	0.00261239	2:42792590:A:G	-3	-3	15	22	0.770833	0.00189117	0.405574	0.120686	0.152285	0.152234	0.38685	6.45598e-05	0.540142	FALSE
ENSG00000289082.1	171	1.04463	63.8406	32.468	0.0365369	2:42790914:T:C	-4412	-4412	3	5	0.0520833	0.0298485	0.712265	0.314546	0.89941	0.899749	0.693568	7.51481e-05	0.9684	FALSE
ENSG00000231826.9	163	1.02989	47.7397	31.3612	0.0132179	2:43063975:C:T	23313	23313	8	12	0.125	0.00879853	0.505206	0.182056	0.461754	0.455798	0.559671	9.24902e-05	0.781445	FALSE
ENSG00000286796.1	332	1.03556	101.835	31.5953	0.00793157	2:43132598:AGGTGAGGTG:A	3777	3777	11	13	0.135417	0.00516643	0.787231	0.263866	0.542646	0.539071	0.59025	4.47848e-05	0.82414	FALSE
ENSG00000230587.5	202	1.02346	73.2402	31.8568	0.00740735	2:43208473:C:CAAAAAAA	-8773	-8773	5	5	0.0520833	0.00497111	0.777676	0.259374	0.408359	0.408513	0.539035	5.81122e-05	0.752631	FALSE
ENSG00000287387.1	194	1.04384	72.0036	31.8447	0.00140716	2:43196776:A:G	-23073	-23073	10	15	0.15625	0.000808282	-0.778145	0.212203	0.0830917	0.0854941	0.309995	6.63398e-05	0.432832	FALSE
ENSG00000152518.8	189	1.03257	66.4232	31.6021	0.00457079	2:43221340:A:T	-5266	-5266	13	21	0.21875	0.00282072	0.391993	0.122011	0.248275	0.24829	0.459265	6.7502e-05	0.641252	FALSE
ENSG00000279873.2	188	1.00272	72.811	33.0312	0.000317434	2:43255905:G:A	28695	28695	4	6	0.0625	0.000208971	1.07614	0.260054	0.0205979	0.0225927	0.169154	5.17433e-05	0.236183	FALSE
ENSG00000234936.1	187	1.02217	70.2593	32.1351	0.0162763	2:43214820:TA:T	-14753	-14753	14	15	0.15625	0.0121057	0.485802	0.183565	0.677132	0.675532	0.63264	6.01277e-05	0.883328	FALSE
ENSG00000115970.19	105	1.00719	21.3574	33.6656	0.0342122	2:43571653:G:A	-24385	-24385	3	5	0.0520833	0.030794	-0.588248	0.26137	0.523248	0.521168	0.584461	0.000181139	0.816058	FALSE
ENSG00000138036.18	109	0.983826	16.3445	30.8608	0.169682	2:43802682:C:T	28643	28643	6	7	0.0729167	0.143245	0.427658	0.285593	0.953505	0.953553	0.705683	0.000205461	0.985316	FALSE
ENSG00000138095.20	98	1.0085	28.0082	32.6128	0.004101	2:43987323:G:T	-8903	-8903	22	34	0.354167	0.00292987	0.265402	0.0829748	0.10339	0.106345	0.339442	0.000139211	0.473949	FALSE
ENSG00000138078.16	99	1.04565	32.1061	32.3408	0.0159958	2:44408890:C:T	47028	47028	4	7	0.0729167	0.0121574	-0.338756	0.128086	0.393261	0.382346	0.528829	0.000150216	0.738381	FALSE
ENSG00000143919.15	98	1.03762	31.2315	32.2979	0.00476414	2:44391450:C:T	29503	29503	6	9	0.09375	0.00328235	0.313962	0.0994808	0.125387	0.126789	0.363864	0.000147663	0.508047	FALSE
ENSG00000068784.13	134	1.0178	24.8217	30.4854	0.0176607	2:45645438:C:A	33273	33273	18	24	0.75	0.0109302	-0.386989	0.143972	0.353365	0.34901	0.513919	0.000165885	0.717564	FALSE
ENSG00000171132.14	106	1.02399	29.2088	31.3067	3.84514e-05	2:45638640:C:T	-12705	-12705	12	14	0.145833	1.32375e-05	-0.597565	0.118012	0.00059994	0.000944309	0.0248542	0.000146118	0.0347028	TRUE
ENSG00000116016.14	33	0.992515	9.25673	33.8752	0.0520594	2:46336253:C:G	42586	42586	4	7	0.0729167	0.0482574	0.558967	0.27311	0.394161	0.393919	0.533195	0.000382688	0.744477	FALSE
ENSG00000119729.12	167	1.01328	50.8943	31.6433	0.0188484	2:46551066:C:G	9260	9260	17	26	0.729167	0.0134441	0.394621	0.151569	0.618638	0.614551	0.615067	7.88103e-05	0.858791	FALSE
ENSG00000250565.7	169	0.989022	50.1882	31.519	0.000500836	2:46541420:G:A	-1157	-1157	37	47	0.510417	0.000242308	0.790231	0.193336	0.0250975	0.0259717	0.181445	6.90767e-05	0.253344	FALSE
ENSG00000119878.6	196	1.03547	52.4764	30.5634	0.0112372	2:46582482:T:C	-33934	-33934	21	25	0.260417	0.00661215	0.772262	0.26743	0.433557	0.430243	0.54813	8.68486e-05	0.76533	FALSE
ENSG00000151665.13	196	1.01543	52.4539	30.799	0.00112529	2:46628364:C:T	11309	11309	16	20	0.208333	0.000509913	0.806526	0.210616	0.0521948	0.0545327	0.258463	7.74375e-05	0.360882	FALSE
ENSG00000279254.1	158	1.0155	46.0513	32.1207	0.00112791	2:46631182:G:C	-37688	-37688	27	42	0.5625	0.000670298	-0.614041	0.16448	0.0460954	0.0480535	0.245331	8.82376e-05	0.342546	FALSE
ENSG00000068724.18	199	1.02096	47.7609	31.6922	0.00360492	2:46958299:G:A	42430	42430	21	26	0.270833	0.00220469	-0.429681	0.130042	0.151785	0.151226	0.385981	8.78269e-05	0.538929	FALSE
ENSG00000180398.13	226	1.0298	60.1264	31.8046	0.00116531	2:46954893:A:C	13038	13038	5	8	0.0833333	0.000652415	-0.602356	0.160938	0.0580942	0.0617318	0.272564	7.34039e-05	0.38057	FALSE
ENSG00000095002.15	44	1.01278	11.626	32.8969	0.0703249	2:47433290:G:C	30223	30223	3	6	0.0625	0.0618163	0.264782	0.137234	0.570643	0.565937	0.59978	0.000343801	0.837448	FALSE
ENSG00000230979.3	18	0.974181	2.70898	36.3978	0.231862	2:47658337:G:T	-32909	-32909	5	8	0.0833333	0.241167	-0.251847	0.211229	0.514649	0.52159	0.584577	0.0011709	0.81622	FALSE
ENSG00000116062.19	16	0.986616	2.72197	36.115	0.177356	2:47658337:G:T	-37193	-37193	5	8	0.0833333	0.184289	0.334919	0.247283	0.416158	0.418122	0.5429	0.00125689	0.758028	FALSE
ENSG00000233230.3	74	1.03651	31.6285	31.932	0.00478875	2:47888987:G:A	-16691	-16691	14	19	0.802083	0.00312364	0.705659	0.222282	0.126887	0.129317	0.365785	0.000144905	0.51073	FALSE
ENSG00000138081.22	74	1.0174	32.285	32.5012	0.045102	2:47942146:A:G	35648	35648	5	8	0.0833333	0.0374862	0.287712	0.133038	0.772423	0.769102	0.659471	0.000127254	0.920792	FALSE
ENSG00000170802.17	108	1.05402	45.3032	32.1068	0.0107842	2:48326489:AAG:A	11852	11852	3	5	0.0520833	0.00772875	-0.506399	0.179166	0.370263	0.362491	0.519391	0.000111492	0.725204	FALSE
ENSG00000162869.16	118	1.01327	31.1476	31.6524	0.031398	2:48452715:T:A	12117	12117	4	5	0.0520833	0.0235362	0.545107	0.230191	0.626737	0.624114	0.618053	0.000128752	0.862961	FALSE
ENSG00000282828.2	87	0.937495	6.22915	35.3096	0.0508627	2:49579606:G:T	16218	16218	12	16	0.166667	0.0519029	0.43902	0.218138	0.30407	0.305826	0.492978	0.000400442	0.688324	FALSE
ENSG00000143942.5	73	1.02013	37.3367	33.1176	0.0517322	2:53812428:C:G	44624	44624	3	6	0.0625	0.0454268	0.504559	0.243191	0.855914	0.857922	0.684623	0.000111801	0.955911	FALSE
ENSG00000068912.15	82	1.02581	36.1702	32.7771	0.0150201	2:53782707:C:T	-4302	-4302	4	7	0.0729167	0.0119302	0.524234	0.197643	0.415058	0.409098	0.539035	0.000119247	0.752631	FALSE
ENSG00000115239.24	149	1.02621	40.3751	31.5474	0.0351491	2:53867501:G:GAA	7341	7341	19	20	0.208333	0.0263757	0.329896	0.142277	0.756924	0.755569	0.65688	0.000107078	0.917173	FALSE
ENSG00000170634.13	116	1.05747	49.4558	32.3355	0.0297108	2:54018510:TA:T	47672	47672	5	7	0.0729167	0.0236337	0.477433	0.201766	0.759724	0.756568	0.657132	0.00010407	0.917526	FALSE
ENSG00000068878.15	116	1.03464	49.1108	32.3558	0.0125947	2:53967294:C:T	-3699	-3699	6	10	0.104167	0.00941884	0.572377	0.208303	0.451455	0.446708	0.554937	9.23643e-05	0.774835	FALSE
ENSG00000289065.1	49	1.00165	32.6286	33.9534	0.0443683	2:54141984:T:TTG	26188	26188	6	11	0.114583	0.0411722	0.43278	0.204144	0.769023	0.772013	0.660449	0.000114721	0.922156	FALSE
ENSG00000115306.16	6	0.984481	2.52013	35.9537	0.366647	2:54468315:TAAAATAAA:T	11998	11998	4	7	0.0729167	0.37317	0.135023	0.149676	0.682732	0.688865	0.636356	0.00134041	0.888517	FALSE
ENSG00000115310.19	10	1.02222	8.90616	35.1839	0.135367	2:55067595:T:A	-45026	-45026	6	11	0.114583	0.136407	0.182895	0.119982	0.718628	0.718513	0.645853	0.000473871	0.901777	FALSE
ENSG00000227799.1	119	1.02847	38.2904	33.0516	0.0407952	2:55211178:C:T	-13102	-13102	3	5	0.0520833	0.0352119	0.716858	0.327207	0.789521	0.788617	0.665686	0.000114375	0.92947	FALSE
ENSG00000143947.15	118	1.04248	39.4423	31.9243	0.00784486	2:55223348:G:A	-8555	-8555	12	19	0.197917	0.0053415	0.528329	0.177853	0.255474	0.24872	0.459294	0.000120161	0.641292	FALSE
ENSG00000162994.16	118	1.02184	40.439	32.4734	2.2945e-06	2:55224878:C:T	-7685	-7685	15	21	0.21875	9.1752e-07	0.917413	0.154366	9.999e-05	7.50652e-05	0.00401293	0.000104253	0.00560308	TRUE
ENSG00000289606.1	123	1.01493	40.5099	32.1727	0.0299051	2:55275260:A:G	39213	39213	5	7	0.0729167	0.0234424	-0.743075	0.313563	0.69973	0.70207	0.640035	9.99709e-05	0.893654	FALSE
ENSG00000085760.15	201	1.0292	46.7795	31.1315	0.0128282	2:55308484:T:C	39137	39137	20	29	0.302083	0.0082688	0.382931	0.136776	0.444656	0.439276	0.551178	9.40174e-05	0.769587	FALSE
ENSG00000240401.9	184	1.01192	48.4869	31.9583	0.00820994	2:55315496:T:C	33146	33146	9	14	0.145833	0.00563859	0.500962	0.169836	0.329667	0.323897	0.503428	8.20635e-05	0.702915	FALSE
ENSG00000115355.18	136	1.01384	37.7604	34.5539	0.0203686	2:55405588:T:C	-14307	-14307	4	7	0.0729167	0.019563	0.35111	0.14348	0.543146	0.533781	0.588255	0.000106566	0.821355	FALSE
ENSG00000163001.12	180	1.01767	39.9476	32.0254	0.0428852	2:55558608:A:AAAAAT	39004	39004	6	7	0.0729167	0.0341613	0.444636	0.201702	0.823618	0.821727	0.673729	0.000103013	0.940699	FALSE
ENSG00000272606.2	206	1.05617	63.7652	31.3626	0.000161641	2:55573856:G:T	-44013	-44013	9	14	0.145833	6.65206e-05	-0.949308	0.20974	0.00689931	0.0077397	0.0951965	8.01598e-05	0.132919	FALSE
ENSG00000275052.5	205	1.0176	65.9057	32.0539	0.00316115	2:55576031:T:A	-42849	-42849	15	22	0.229167	0.00202694	-0.340309	0.102038	0.180882	0.181689	0.412262	6.24206e-05	0.575624	FALSE
ENSG00000138035.15	77	1.00434	19.4445	35.2358	0.0333505	2:55659645:C:T	-34218	-34218	5	9	0.09375	0.0339549	-0.515852	0.23372	0.482152	0.480839	0.569748	0.000195614	0.795515	FALSE
ENSG00000028116.18	22	1.02373	14.5711	33.6334	0.0364298	2:57950548:T:G	42919	42919	3	6	0.0625	0.0327781	0.444315	0.199881	0.414959	0.406376	0.538492	0.000292328	0.751873	FALSE
ENSG00000287875.1	21	1.04709	15.3203	33.9568	0.137993	2:58006329:C:T	-40371	-40371	3	6	0.0625	0.132004	-0.412358	0.267372	0.888011	0.889055	0.690753	0.000317038	0.964469	FALSE
ENSG00000115392.13	70	0.928033	4.15337	36.5996	0.376392	2:58282493:A:C	41083	41083	14	19	0.802083	0.387177	0.179199	0.204642	0.868113	0.873295	0.687692	0.000564626	0.960194	FALSE
ENSG00000233426.3	75	0.927085	4.17258	36.6059	0.00784923	2:58282493:A:C	31053	31053	14	19	0.802083	0.00935727	0.476428	0.173219	0.0471953	0.0424155	0.232189	0.000558377	0.324195	FALSE
ENSG00000228590.4	88	1.02778	32.5435	32.441	0.0055024	2:60399170:A:G	-40658	-40658	13	17	0.177083	0.00391353	0.617692	0.199926	0.154085	0.154706	0.38871	0.000134033	0.542739	FALSE
ENSG00000119866.22	58	1.01385	17.201	32.6255	0.0277968	2:60553515:G:GGAGA	-952	-952	12	17	0.822917	0.0226096	0.27813	0.116599	0.382762	0.377639	0.526931	0.000233886	0.735731	FALSE
ENSG00000115421.13	68	1.00748	24.9211	31.8156	0.122026	2:60780647:A:G	24394	24394	14	20	0.208333	0.104586	-0.193398	0.116066	0.958304	0.960393	0.707132	0.00015551	0.987338	FALSE
ENSG00000162924.16	66	1.015	21.4696	31.1479	0.0486007	2:60903497:C:T	22006	22006	5	6	0.0625	0.036412	0.559632	0.257213	0.650935	0.650748	0.62513	0.000188668	0.872843	FALSE
ENSG00000237522.1	90	0.99537	30.1712	32.4436	0.0368768	2:60946806:C:T	8757	8757	12	15	0.15625	0.0300827	0.564825	0.249815	0.681532	0.679979	0.633673	0.000119452	0.884771	FALSE
ENSG00000162928.9	61	1.03115	21.7592	31.8315	0.0210307	2:61004628:CA:C	-12597	-12597	4	8	0.0833333	0.0154674	0.593925	0.233308	0.357064	0.35557	0.516159	0.000204294	0.720691	FALSE
ENSG00000162927.14	61	1.04289	20.5976	30.9016	0.032236	2:61022966:A:C	4707	4707	4	7	0.0729167	0.022537	-0.569317	0.238535	0.478952	0.470552	0.565136	0.000230495	0.789076	FALSE
ENSG00000162929.14	81	1.0641	26.9153	30.4235	0.0511335	2:61022966:A:C	-42905	-42905	4	7	0.0729167	0.0362479	-0.48963	0.224828	0.743726	0.735042	0.651402	0.000198066	0.909525	FALSE
ENSG00000212978.6	187	1.02438	44.357	30.5881	0.0213721	2:61161255:T:C	16286	16286	5	8	0.0833333	0.013731	-0.622546	0.239912	0.609939	0.605828	0.612448	9.645e-05	0.855135	FALSE
ENSG00000173209.23	192	1.03932	54.3507	31.3117	8.56819e-06	2:61172212:T:C	-5206	-5206	24	31	0.322917	2.48895e-06	-0.934714	0.166483	0.00039996	0.000338615	0.0121338	8.56891e-05	0.0169419	TRUE
ENSG00000273302.1	173	1.03568	66.3671	32.611	0.0213456	2:61229259:AT:A	29280	29280	3	6	0.0625	0.0170389	-0.787043	0.314152	0.757324	0.749268	0.655392	6.8758e-05	0.915096	FALSE
ENSG00000115464.15	199	1.01819	50.7697	30.7391	0.0194096	2:61497433:G:A	26346	26346	10	14	0.145833	0.0125335	-0.285491	0.108457	0.625837	0.622518	0.617647	8.1305e-05	0.862394	FALSE
ENSG00000270820.8	199	1.0364	50.1757	30.3446	0.00198358	2:61480279:C:CTTT	9091	9091	30	44	0.458333	0.000884205	0.401567	0.11047	0.0825917	0.0857735	0.310249	9.13065e-05	0.433187	FALSE
ENSG00000082898.19	150	0.98867	21.1974	31.1949	0.013552	2:61518418:AACACACACA:A	-20324	-20324	25	36	0.375	0.00886	-0.385731	0.139141	0.261674	0.256085	0.463141	0.000163214	0.646664	FALSE
ENSG00000170264.13	87	1.02323	30.9068	33.0982	0.00492842	2:61883417:CAA:C	29273	29273	5	6	0.0625	0.00382204	1.0473	0.337995	0.136086	0.134141	0.371899	0.000137491	0.519267	FALSE
ENSG00000115484.15	96	1.02921	30.1482	32.1769	0.0922051	2:61875450:C:T	-13221	-13221	3	5	0.0520833	0.0788688	-0.496045	0.274039	0.941106	0.942876	0.702963	0.000145862	0.981518	FALSE
ENSG00000173163.11	96	1.03287	31.2596	32.5708	0.00524606	2:61872656:G:A	-16068	-16068	9	11	0.114583	0.00378843	0.508999	0.164092	0.141586	0.14074	0.37848	0.000143633	0.528455	FALSE
ENSG00000170340.11	96	1.03884	29.6898	32.1632	0.0669758	2:62203267:A:G	7152	7152	3	6	0.0625	0.0558624	-0.498787	0.252188	0.860514	0.86419	0.686041	0.000156391	0.95789	FALSE
ENSG00000228541.3	41	1.02388	14.7041	34.2432	0.056231	2:62293607:C:G	-2639	-2639	3	5	0.0520833	0.0535416	0.628693	0.314672	0.566243	0.562323	0.599478	0.000289936	0.837025	FALSE
ENSG00000115507.10	19	0.96497	6.74665	33.4517	0.00785851	2:63007418:A:G	-42639	-42639	4	5	0.0520833	0.00653236	0.716774	0.247808	0.060394	0.0581686	0.265959	0.000442556	0.371347	FALSE
ENSG00000014641.21	35	1.01555	16.8977	34.6011	0.0179151	2:63547553:G:GTA	-41056	-41056	3	6	0.0625	0.0172578	-0.49713	0.198856	0.256474	0.256493	0.46336	0.000240457	0.64697	FALSE
ENSG00000143951.16	18	1.03235	9.93609	33.8368	0.0173724	2:63845613:A:C	17770	17770	4	7	0.0729167	0.0155267	0.233093	0.0916221	0.147685	0.148943	0.384601	0.000449994	0.537002	FALSE
ENSG00000169764.16	25	1.00945	13.4499	34.4613	0.0591111	2:63844098:A:C	3146	3146	6	7	0.0729167	0.0571357	-0.30565	0.155379	0.552645	0.555076	0.596579	0.000291454	0.832979	FALSE
ENSG00000143952.20	52	1.00813	27.7581	33.7582	0.0844567	2:64000692:A:G	-18736	-18736	6	7	0.0729167	0.078867	0.583866	0.322553	0.909009	0.912423	0.696291	0.000140158	0.972201	FALSE
ENSG00000228079.2	130	1.0227	40.9217	31.2481	0.00737999	2:64117498:T:TA	29252	29252	22	31	0.322917	0.00454169	0.507916	0.167468	0.252575	0.251655	0.460372	0.000103537	0.642797	FALSE
ENSG00000225889.10	122	1.00495	30.7667	30.8546	0.0104646	2:64099166:T:TACAC	-44074	-44074	33	38	0.395833	0.00634861	0.548946	0.189057	0.283172	0.274293	0.472651	0.000124088	0.659942	FALSE
ENSG00000197329.12	121	1.02771	31.3934	30.6534	2.1651e-06	2:64130072:G:A	-14348	-14348	6	9	0.90625	4.04312e-07	0.571633	0.0919966	0.00019998	5.15025e-05	0.00303383	0.000138886	0.00423601	TRUE
ENSG00000288932.2	192	1.00895	49.2152	31.3634	0.000488133	2:64284464:A:T	10755	10755	28	36	0.375	0.000227128	-0.3982	0.096896	0.0205979	0.022877	0.170478	7.94437e-05	0.238031	FALSE
ENSG00000289176.1	213	1.01876	78.4299	32.5688	0.000891866	2:64382702:C:T	40993	40993	4	6	0.0625	0.00056863	-1.08023	0.284935	0.0647935	0.0637698	0.275972	5.28098e-05	0.385328	FALSE
ENSG00000236148.5	207	1.01252	78.2242	32.7673	0.00217178	2:64367769:T:C	20028	20028	9	12	0.125	0.0015249	-0.772265	0.224554	0.149685	0.152078	0.386737	5.10499e-05	0.539985	FALSE
ENSG00000119862.13	74	1.00114	30.1177	33.2773	0.0282134	2:64447513:T:G	-6456	-6456	34	46	0.520833	0.0243723	-0.446885	0.189923	0.580042	0.577139	0.603702	0.000123905	0.842923	FALSE
ENSG00000260101.2	150	1.02546	41.2558	30.7179	0.011689	2:64514797:A:G	-9313	-9313	5	6	0.0625	0.00705921	1.37492	0.480389	0.373163	0.372151	0.524832	0.000104343	0.7328	FALSE
ENSG00000119844.17	150	1.02979	45.6742	31.4986	0.0232799	2:64542805:ATGTT:A	18506	18506	4	8	0.0833333	0.0166903	0.303469	0.120714	0.648535	0.646747	0.623785	9.66162e-05	0.870964	FALSE
ENSG00000179833.4	66	1.00184	12.4379	33.9458	0.0424155	2:64733902:A:G	-17103	-17103	5	8	0.0833333	0.0392893	0.440791	0.20585	0.413159	0.415834	0.541903	0.000301253	0.756636	FALSE
ENSG00000234572.1	116	1.0144	35.1613	32.2464	0.023369	2:64889250:A:C	25624	25624	26	45	0.46875	0.0180986	0.347262	0.140027	0.562244	0.557977	0.597781	0.000114817	0.834657	FALSE
ENSG00000115902.11	115	1.0541	39.2483	32.0157	0.0172203	2:65003929:GT:G	15452	15452	3	5	0.0520833	0.0126973	0.847531	0.322623	0.479452	0.468615	0.564425	0.000128736	0.788082	FALSE
ENSG00000232613.7	159	1.04156	49.0709	32.6743	0.00597738	2:65003929:GT:G	-26791	-26791	3	5	0.0520833	0.004419	0.932107	0.306275	0.239076	0.237249	0.45245	9.61003e-05	0.631737	FALSE
ENSG00000237638.3	193	1.02244	38.5888	30.6009	0.0065688	2:65083897:A:G	27671	27671	22	24	0.25	0.00361804	-0.364116	0.11673	0.220478	0.215416	0.439651	0.000109629	0.613866	FALSE
ENSG00000011523.15	193	1.01913	40.3237	31.0791	0.000757576	2:65076640:TAAC:T	20286	20286	31	40	0.583333	0.00034743	0.439803	0.110977	0.0234977	0.0279274	0.187304	0.000102922	0.261525	FALSE
ENSG00000138069.18	272	1.00239	35.843	30.2745	0.0784054	2:65155721:G:GT	25390	25390	5	5	0.0520833	0.0581603	-0.431863	0.220491	0.944606	0.946179	0.703329	0.000104898	0.982028	FALSE
ENSG00000172974.11	98	1.00641	35.4033	32.7011	0.0149309	2:65250869:C:T	45761	45761	24	40	0.583333	0.0117555	0.342215	0.128728	0.412459	0.409803	0.539329	0.00010878	0.753042	FALSE
[truncated: 13,547 more rows]

## Sheet: TableS14
Table S14: Cis-eQTL results for T1 timepoint from TensorQTL permutation analysis with significant cis-eGenes (FDR < 0.1) labelled
phenotype_id	num_var	beta_shape1	beta_shape2	true_df	pval_true_df	variant_id	start_distance	end_distance	ma_samples	ma_count	af	pval_nominal	slope	slope_se	pval_perm	pval_beta	qval	pval_nominal_threshold	pval_adj_BH	is_eGene
ENSG00000290825.1	7	0.989007	6.08378	33.145	0.113814	1:17594:C:T	5725	5725	9	9	0.09375	0.114619	0.571613	0.352715	0.523448	0.525511	0.567787	0.000570092	0.812516	FALSE
ENSG00000227232.5	8	1.00309	6.85855	32.6525	0.0373	1:17594:C:T	-11976	-11976	9	9	0.09375	0.036288	-0.62068	0.284381	0.232477	0.22825	0.430028	0.000550285	0.61538	FALSE
ENSG00000238009.6	44	1.01343	15.2191	30.4337	0.00196788	1:133483:G:T	-240	-240	31	41	0.427083	0.0012602	0.488548	0.138529	0.0257974	0.0280236	0.187052	0.000263678	0.267675	FALSE
ENSG00000268903.1	46	1.02034	17.2498	30.6401	0.0345869	1:92742:G:A	-43153	-43153	5	5	0.0520833	0.0282142	0.791947	0.345044	0.446855	0.445393	0.539403	0.000242193	0.771897	FALSE
ENSG00000269981.1	48	0.992897	20.0201	31.8662	0.0622685	1:92742:G:A	-45223	-45223	5	5	0.0520833	0.0577271	0.652797	0.332	0.723428	0.72648	0.632832	0.000177337	0.905597	FALSE
ENSG00000239906.1	49	1.01996	19.7439	30.9285	0.0862925	1:92742:G:A	-47597	-47597	5	5	0.0520833	0.0762802	0.888657	0.485578	0.826217	0.82658	0.657232	0.000211152	0.940513	FALSE
ENSG00000241860.7	38	1.00146	19.341	31.4876	0.0277437	1:134266:G:A	-39596	-39596	7	8	0.0833333	0.0242	0.502194	0.212567	0.417858	0.418976	0.527082	0.000193306	0.754266	FALSE
ENSG00000279928.2	30	1.02371	17.0302	31.4407	0.0860309	1:191617:A:C	8921	8921	6	6	0.0625	0.078505	-0.8739	0.48129	0.777622	0.776694	0.645457	0.000250122	0.923663	FALSE
ENSG00000279457.4	11	1.00415	11.2589	33.7287	0.0146309	1:181481:AG:A	-13930	-13930	10	10	0.104167	0.0157577	0.603843	0.237193	0.152885	0.151502	0.373224	0.0003374	0.534091	FALSE
ENSG00000290385.1	6	0.960839	3.28059	34.8826	0.0363823	1:502653:G:T	-20275	-20275	7	9	0.09375	0.0418959	-0.413442	0.195308	0.128487	0.125849	0.348998	0.000888695	0.499424	FALSE
ENSG00000237491.10	156	1.04996	25.6493	29.1997	0.0657318	1:818802:A:G	40055	40055	10	15	0.84375	0.0502009	0.44702	0.219922	0.813219	0.811906	0.654049	0.000192508	0.935958	FALSE
ENSG00000228794.12	202	1.01257	38.8333	30.4175	0.0347827	1:855316:C:CAT	30178	30178	5	5	0.947917	0.0278027	-0.815574	0.354336	0.740826	0.742789	0.63651	0.000102852	0.91086	FALSE
ENSG00000230021.10	201	1.02242	37.9049	30.0141	0.0248099	1:804046:A:G	-23750	-23750	9	13	0.864583	0.0185183	0.553934	0.223575	0.605139	0.60436	0.596039	0.000111594	0.852945	FALSE
ENSG00000188976.11	167	1.06214	36.4362	28.1169	0.0014743	1:955641:G:A	-3668	-3668	17	21	0.78125	0.000562354	-0.524503	0.137378	0.040296	0.0424633	0.227909	0.000144829	0.326143	FALSE
ENSG00000187961.15	170	1.03045	39.0013	29.0942	0.00344292	1:958082:C:T	-2502	-2502	16	19	0.802083	0.00181837	0.52164	0.153799	0.114789	0.116773	0.338462	0.000113565	0.484347	FALSE
ENSG00000187583.11	178	1.02867	38.8983	28.6439		1:941119:A:G	-25363	-25363	10	10	0.895833	0.000140171	1.14036	0.264845	0.0110989	0.0133501	0.132711	0.000112717	0.189913	FALSE
ENSG00000272512.1	206	1.03754	52.2215	29.485	0.00132346	1:1029460:T:C	31409	31409	6	9	0.09375	0.000674302	0.857036	0.228359	0.0566943	0.0594496	0.260561	8.82953e-05	0.372868	FALSE
ENSG00000188290.11	212	1.03251	54.7595	29.5546	0.000778021	1:1039190:T:G	39018	39018	3	6	0.0625	0.000379401	0.905206	0.228724	0.0368963	0.0371283	0.213946	8.18472e-05	0.306162	FALSE
ENSG00000187608.10	201	1.04811	54.006	29.5628	0.000931677	1:975029:T:C	-26109	-26109	5	8	0.0833333	0.000464353	-0.537499	0.138314	0.0382962	0.0416254	0.225435	9.05526e-05	0.322603	FALSE
ENSG00000231702.2	204	1.04796	59.6046	29.7325	0.00608318	1:993036:G:A	-15193	-15193	7	8	0.0833333	0.00382279	-0.997197	0.320454	0.284672	0.283287	0.466364	8.1983e-05	0.667378	FALSE
ENSG00000188157.15	199	1.04762	57.462	29.5216	0.00022308	1:1039190:T:G	19070	19070	3	6	0.0625	9.38015e-05	0.824519	0.185514	0.00819918	0.0101406	0.112605	8.48791e-05	0.16114	FALSE
ENSG00000131591.18	157	1.03511	41.855	29.3569	0.0350588	1:1101496:T:A	-14865	-14865	4	6	0.0625	0.0253055	0.587807	0.250875	0.764024	0.764285	0.641931	0.000108657	0.918618	FALSE
ENSG00000223823.1	136	1.01301	39.611	30.5438	0.0219941	1:1153882:A:G	16865	16865	12	19	0.197917	0.0172089	0.519166	0.206946	0.582542	0.579745	0.587355	0.000101094	0.840518	FALSE
ENSG00000162571.14	177	1.03423	39.2148	29.9586	0.0357843	1:1163041:C:T	-10839	-10839	5	9	0.09375	0.0274519	0.543006	0.235343	0.753025	0.749077	0.638169	0.000115394	0.913234	FALSE
ENSG00000186891.14	212	1.0185	46.523	29.7471	0.00139183	1:1211917:G:A	5325	5325	9	10	0.104167	0.000753658	-1.08932	0.293375	0.0568943	0.0591672	0.260222	8.88851e-05	0.372383	FALSE
ENSG00000186827.12	224	1.03	45.6853	29.2609	0.00500492	1:1263238:T:A	49085	49085	15	18	0.1875	0.00284995	-0.621125	0.192683	0.194181	0.193196	0.404089	9.67083e-05	0.578261	FALSE
ENSG00000078808.20	262	1.01488	51.3045	29.6329	0.0157996	1:1205055:G:T	-26976	-26976	28	38	0.604167	0.0108001	-0.197028	0.0729199	0.553845	0.551396	0.577919	7.89175e-05	0.827015	FALSE
ENSG00000176022.7	261	1.01288	45.5757	28.6824	0.012708	1:1217733:G:A	-14504	-14504	14	15	0.15625	0.00745473	-0.620811	0.217734	0.438656	0.43546	0.534542	8.7799e-05	0.764941	FALSE
ENSG00000184163.3	255	1.01181	48.951	29.0206	0.0201089	1:1255143:C:T	8421	8421	8	8	0.0833333	0.0130984	0.820262	0.312747	0.629537	0.624982	0.601553	8.1233e-05	0.860835	FALSE
ENSG00000260179.1	261	1.03468	44.4921	28.0851	0.0100103	1:1281201:G:C	29867	29867	6	7	0.0729167	0.00518402	0.762987	0.254823	0.350165	0.344458	0.495311	0.000101971	0.708801	FALSE
ENSG00000160087.21	212	1.03035	46.8212	29.2703	0.00147869	1:1279728:TG:T	5864	5864	7	9	0.09375	0.00072896	0.463928	0.124543	0.0594941	0.0609134	0.262504	9.45512e-05	0.37565	FALSE
ENSG00000230415.1	208	1.00466	44.2377	29.2714	0.00414848	1:1252487:C:A	-22736	-22736	8	9	0.09375	0.00231434	-0.858026	0.259862	0.166483	0.166303	0.383796	8.61558e-05	0.54922	FALSE
ENSG00000162572.21	205	1.02042	39.6632	28.4429	0.00705426	1:1318756:G:A	38320	38320	18	22	0.770833	0.00366621	0.393709	0.125873	0.240976	0.236171	0.434231	0.000105422	0.621394	FALSE
ENSG00000169972.13	213	0.987633	36.455	29.4725	0.0383794	1:1281878:G:C	-26719	-26719	5	8	0.0833333	0.0282956	0.309561	0.134947	0.765223	0.763979	0.641808	9.42923e-05	0.918441	FALSE
ENSG00000131584.19	212	1.00493	36.8392	29.4549	0.01254	1:1290841:A:G	-18768	-18768	31	43	0.447917	0.00817134	0.289624	0.1029	0.374563	0.369421	0.507502	0.000103623	0.726247	FALSE
ENSG00000127054.22	307	1.00851	36.4259	28.6319	0.00155774	1:1274980:C:T	-49707	-49707	18	23	0.239583	0.000673177	0.312356	0.0832144	0.0517948	0.0536778	0.251262	0.000107053	0.359561	FALSE
ENSG00000224051.7	308	0.971304	37.4825	29.4336	0.00651129	1:1352182:G:A	27426	27426	6	8	0.0833333	0.00393196	-0.37622	0.121321	0.238576	0.22917	0.43016	8.2796e-05	0.615568	FALSE
ENSG00000169962.5	307	0.980557	41.4228	29.7168	1.42076e-05	1:1302224:T:C	-29056	-29056	13	13	0.864583	4.70014e-06	-1.31064	0.239905	0.00059994	0.000685266	0.0219606	7.94178e-05	0.0314261	TRUE
ENSG00000107404.21	299	0.990674	36.0826	29.2077	0.0127518	1:1361679:G:A	12261	12261	23	37	0.385417	0.00805058	0.236277	0.083769	0.379462	0.37517	0.50984	9.70622e-05	0.729593	FALSE
ENSG00000162576.17	307	0.998766	35.833	29.0991	0.0263938	1:1361685:C:T	-92	-92	29	42	0.4375	0.0179387	-0.483741	0.194186	0.617338	0.617059	0.599607	0.000102666	0.858051	FALSE
ENSG00000175756.14	349	0.990813	34.686	28.7259	0.0342406	1:1376092:G:A	885	885	4	8	0.0833333	0.0230986	0.232677	0.0976501	0.70403	0.704839	0.627592	0.000101057	0.898099	FALSE
ENSG00000221978.13	308	0.991017	32.3891	29.0924	0.00454098	1:1409847:G:T	10512	10512	7	7	0.0729167	0.00248222	0.671888	0.205119	0.139386	0.139997	0.362778	0.000108359	0.519143	FALSE
ENSG00000224870.9	307	0.981692	31.7848	29.0237	0.0016592	1:1384546:C:T	-14969	-14969	23	32	0.333333	0.000787322	0.581598	0.157302	0.0549945	0.0546713	0.252172	0.000104241	0.360864	FALSE
ENSG00000242485.6	306	0.982077	32.3814	29.0916	0.00520246	1:1403129:C:CAAAAAAAA	-4166	-4166	9	9	0.09375	0.00289222	-0.427482	0.132841	0.168583	0.16173	0.379742	0.000102565	0.54342	FALSE
ENSG00000272455.1	308	1.00223	34.8749	29.0922	0.00133749	1:1375679:TA:T	-33418	-33418	30	43	0.447917	0.000626581	-0.581751	0.15393	0.0427957	0.0452508	0.233498	0.000107707	0.33414	FALSE
ENSG00000215915.10	223	1.01702	27.8941	28.2051	0.0216151	1:1407232:G:C	-42457	-42457	33	43	0.447917	0.0128535	-0.537414	0.204296	0.453155	0.4482	0.540213	0.000146952	0.773057	FALSE
ENSG00000160072.20	182	1.00962	29.8619	28.8422	0.00453893	1:1511847:T:C	40082	40082	5	5	0.0520833	0.00237392	-1.60729	0.488192	0.125987	0.12408	0.347022	0.000131439	0.496596	FALSE
ENSG00000197785.14	217	1.01573	43.9306	28.5848	0.0053895	1:1504291:C:G	-7871	-7871	4	5	0.0520833	0.0027589	-0.67911	0.209872	0.20268	0.205055	0.412574	9.26207e-05	0.590402	FALSE
ENSG00000205090.9	233	1.01726	42.7951	28.3246	0.00105158	1:1546857:CAACAAAA:C	6233	6233	9	10	0.104167	0.000399051	1.25037	0.317371	0.0393961	0.0414268	0.225233	9.59307e-05	0.322314	FALSE
ENSG00000215014.5	289	1.00109	52.5063	28.4725	0.023496	1:1533883:G:T	-40219	-40219	6	7	0.0729167	0.0146213	-0.898359	0.348593	0.712729	0.712635	0.62958	7.10533e-05	0.900943	FALSE
ENSG00000160075.12	293	1.01366	52.4038	28.1289	0.000949423	1:1547630:G:A	-27233	-27233	27	40	0.583333	0.000337863	0.244359	0.0611121	0.0467953	0.0463352	0.236478	7.67115e-05	0.338405	FALSE
ENSG00000228594.4	289	1.00273	63.2137	28.8773	0.028834	1:1563537:C:CA	-36598	-36598	24	31	0.322917	0.0193322	-0.303702	0.123491	0.838116	0.842012	0.661354	5.96024e-05	0.946413	FALSE
ENSG00000286989.1	288	1.028	58.2423	28.0015	0.0508146	1:1606445:G:GGCTGGGCTG	6131	6131	5	5	0.0520833	0.0337506	1.01986	0.460369	0.949005	0.94942	0.686841	7.50031e-05	0.982885	FALSE
ENSG00000197530.13	283	1.00689	64.5403	28.9109	0.0294367	1:1600379:C:T	-15075	-15075	9	10	0.104167	0.0198616	-0.371894	0.151932	0.850215	0.853021	0.664188	5.98454e-05	0.950468	FALSE
ENSG00000272106.1	284	1.03686	63.9638	28.2652	0.00932872	1:1663377:C:T	47582	47582	5	5	0.0520833	0.00491463	-1.38661	0.459913	0.434957	0.433128	0.533793	7.18164e-05	0.76387	FALSE
ENSG00000189409.14	273	1.01432	73.6317	29.08	0.0274452	1:1646243:G:A	14080	14080	5	8	0.0833333	0.018702	0.596956	0.241348	0.865513	0.868116	0.668344	5.48103e-05	0.956416	FALSE
ENSG00000248333.9	287	1.00623	84.8046	29.6055	0.000205116	1:1659220:A:G	208	208	20	29	0.302083	8.74662e-05	-0.418442	0.0936408	0.0162984	0.0167723	0.147378	4.53675e-05	0.210901	FALSE
ENSG00000272004.1	285	1.00332	81.4129	29.2446	0.00088239	1:1659060:G:A	-265	-265	18	28	0.291667	0.000406286	-0.626418	0.159255	0.0670933	0.0686445	0.277557	4.64432e-05	0.39719	FALSE
ENSG00000189339.12	358	1.02619	98.5983	29.3805	0.000147761	1:1665535:T:C	-27260	-27260	11	12	0.125	5.68891e-05	0.808319	0.175104	0.0111989	0.0128032	0.129569	4.38523e-05	0.185416	FALSE
ENSG00000215914.4	366	1.01318	100.244	29.5233	0.00131931	1:1691377:C:T	-8565	-8565	24	38	0.604167	0.000677492	0.505338	0.134709	0.118588	0.119973	0.342071	3.99921e-05	0.48951	FALSE
ENSG00000008128.23	376	1.01311	84.8109	29.1129	0.0229291	1:1747472:A:T	23115	23115	5	6	0.0625	0.0153456	-0.693066	0.271058	0.852315	0.857203	0.665317	4.72493e-05	0.952084	FALSE
ENSG00000227775.3	377	1.04027	80.4615	28.4878	0.0330544	1:1674848:G:C	-49664	-49664	33	45	0.46875	0.0216339	-0.584042	0.242234	0.927207	0.928043	0.682463	5.81982e-05	0.97662	FALSE
ENSG00000290854.1	352	1.01483	66.9855	28.5302	0.0015395	1:1708728:C:T	-37264	-37264	12	17	0.177083	0.000649339	0.725004	0.192485	0.0944906	0.094183	0.311931	6.04282e-05	0.44638	FALSE
ENSG00000008130.15	261	1.00913	48.0722	28.1839	0.0143892	1:1752624:C:T	-27833	-27833	5	5	0.0520833	0.00801049	-0.475382	0.168422	0.50005	0.497421	0.558878	8.1419e-05	0.799767	FALSE
ENSG00000231050.3	214	1.00064	44.8489	29.8746	0.00265105	1:1881249:A:G	-9974	-9974	22	31	0.322917	0.00157073	0.577184	0.167503	0.111389	0.112058	0.333376	8.29594e-05	0.477068	FALSE
ENSG00000078369.19	208	0.994678	42.8037	29.6666	0.033795	1:1865951:T:A	-26341	-26341	13	14	0.145833	0.025061	0.245584	0.104625	0.765523	0.772143	0.644731	8.38449e-05	0.922624	FALSE
ENSG00000169885.10	167	1.0176	32.7396	29.2571	0.067002	1:1887206:T:G	-27902	-27902	4	6	0.0625	0.0515148	-0.606829	0.300345	0.891511	0.893653	0.675587	0.000125633	0.96678	FALSE
ENSG00000187730.9	58	1.01691	22.7666	32.4018	0.0507342	1:2059802:C:G	40473	40473	3	6	0.0625	0.0486157	0.528926	0.258301	0.687531	0.687895	0.622571	0.000179918	0.890913	FALSE
ENSG00000067606.17	105	1.03747	37.1261	30.8416	0.0337809	1:2066876:A:G	16465	16465	13	20	0.208333	0.0280314	-0.395887	0.172269	0.712829	0.707083	0.628773	0.000124127	0.899788	FALSE
ENSG00000271806.1	122	1.02199	60.6809	31.9985	0.038963	1:2186496:G:GC	41217	41217	34	43	0.447917	0.0359822	-0.38391	0.17559	0.907809	0.906845	0.678534	6.95443e-05	0.970997	FALSE
ENSG00000182873.5	107	1.00443	50.7125	31.2709	1.81388e-05	1:2189679:C:T	5290	5290	21	26	0.729167	1.05629e-05	0.90155	0.173741	0.00059994	0.00088977	0.0258671	7.50534e-05	0.0370163	TRUE
ENSG00000234396.3	143	1.00616	47.7487	30.0918	0.000499761	1:2252315:C:G	39792	39792	17	23	0.239583	0.00026451	-0.667449	0.163409	0.020398	0.0229899	0.170083	8.05381e-05	0.243393	FALSE
ENSG00000162585.17	144	0.988269	47.7249	30.1552	0.000791544	1:2207910:CGTGTGT:C	-4811	-4811	6	8	0.0833333	0.000443273	-0.547649	0.140331	0.0385961	0.0387286	0.218314	7.23066e-05	0.312412	FALSE
ENSG00000157933.11	165	1.01997	49.8449	29.4258	0.0152487	1:2182832:C:T	-44556	-44556	6	7	0.0729167	0.0101148	-0.44125	0.16171	0.527647	0.525721	0.567787	8.36743e-05	0.812516	FALSE
ENSG00000116151.14	283	1.03306	88.8643	29.7901	0.0226849	1:2386420:G:GT	-5287	-5287	4	5	0.0520833	0.0163838	0.959527	0.379346	0.863214	0.862743	0.666576	5.05996e-05	0.953885	FALSE
ENSG00000157916.20	284	1.03419	96.791	30.3807	0.000603502	1:2345148:G:A	-46627	-46627	17	21	0.21875	0.000347435	-0.343274	0.0860618	0.0493951	0.050731	0.246879	4.67548e-05	0.353289	FALSE
ENSG00000157911.11	204	1.05296	77.0968	30.1083	0.00351259	1:2383824:C:G	-29973	-29973	18	28	0.291667	0.00222793	0.455288	0.137297	0.213879	0.215938	0.41955	6.51536e-05	0.600385	FALSE
ENSG00000149527.18	158	1.03989	62.769	30.2285	0.000258883	1:2419005:C:T	-6975	-6975	10	15	0.15625	0.000133634	-0.558867	0.129299	0.0106989	0.0134445	0.132711	7.4438e-05	0.189913	FALSE
ENSG00000157881.16	135	1.01414	23.4267	28.6336	0.0268139	1:2494553:C:T	-32044	-32044	28	40	0.583333	0.0173241	-0.270651	0.108006	0.475252	0.4642	0.545591	0.000172045	0.780752	FALSE
ENSG00000157873.18	172	1.02542	20.8078	28.2715	0.113521	1:2561226:G:T	5587	5587	17	17	0.177083	0.086907	0.208959	0.118426	0.912309	0.914868	0.680249	0.000206762	0.973451	FALSE
ENSG00000238164.6	169	0.99506	21.3433	29.0784	0.0262794	1:2510396:T:TCCGATCGGC	-46635	-46635	3	5	0.0520833	0.0178103	-0.764249	0.306414	0.439156	0.435959	0.534704	0.000168543	0.765172	FALSE
ENSG00000228037.1	145	1.00142	15.5223	29.6689	0.133465	1:2580534:A:AAAT	-1026	-1026	23	34	0.645833	0.113213	-0.325248	0.199885	0.886711	0.891531	0.675505	0.000240797	0.966662	FALSE
ENSG00000157870.17	138	0.981073	12.7479	30.0387	0.13146	1:2557169:T:C	-29322	-29322	23	33	0.65625	0.113617	-0.228105	0.140348	0.833617	0.838802	0.660484	0.000258999	0.945166	FALSE
ENSG00000142606.16	89	0.952337	5.0589	31.9485	0.00376281	1:2583136:C:T	-49880	-49880	19	26	0.729167	0.00322535	-0.565261	0.177941	0.0252975	0.0231672	0.170708	0.000544523	0.244287	FALSE
ENSG00000162591.17	113	1.04421	33.6909	30.9909	0.0128749	1:3629700:CCGGG:C	18192	18192	25	34	0.354167	0.0102345	0.277257	0.101788	0.337866	0.333079	0.490002	0.000142017	0.701204	FALSE
ENSG00000238260.3	114	1.05759	35.6489	30.9471	0.0605964	1:3628056:C:T	3270	3270	3	5	0.0520833	0.0525464	-0.748471	0.372177	0.881512	0.881657	0.672861	0.000144436	0.962879	FALSE
ENSG00000158109.15	115	1.04715	36.6348	31.0285	0.00212807	1:3615031:C:T	-9984	-9984	3	6	0.0625	0.00152797	0.532072	0.153957	0.0627937	0.0651939	0.27127	0.000132755	0.388193	FALSE
ENSG00000116213.16	85	1.02958	29.0622	31.2024	0.00551291	1:3623460:T:G	-29301	-29301	26	35	0.364583	0.00429725	0.383571	0.125069	0.137486	0.13872	0.361649	0.000151629	0.517527	FALSE
ENSG00000227372.12	177	1.01298	52.1912	29.9735	0.0188445	1:3778997:T:G	31624	31624	7	8	0.0833333	0.0136567	0.446839	0.1715	0.631237	0.623923	0.601287	7.67169e-05	0.860455	FALSE
ENSG00000235169.11	253	1.01607	61.3976	29.2495	2.26274e-06	1:3780727:C:T	7978	7978	22	25	0.260417	4.98249e-07	0.928561	0.149165	0.00019998	0.000119636	0.00638867	6.64072e-05	0.00914233	TRUE
ENSG00000130764.10	324	1.02623	77.452	29.56	0.00775511	1:3826755:G:A	30257	30257	22	34	0.354167	0.00486798	0.366257	0.121332	0.444456	0.440117	0.536632	5.58355e-05	0.767932	FALSE
ENSG00000169598.17	363	1.02027	101.262	30.2017	0.0192428	1:3833209:A:G	-24058	-24058	3	6	0.0625	0.0143444	0.570139	0.220551	0.856714	0.855609	0.664697	4.12644e-05	0.951195	FALSE
ENSG00000116198.14	363	1.02146	101.68	30.1799	0.000294417	1:3816218:T:C	-41178	-41178	12	18	0.8125	0.000151801	-0.710267	0.166023	0.0260974	0.0271055	0.18326	4.13793e-05	0.262249	FALSE
ENSG00000198912.12	188	1.02944	69.3419	30.5456	0.00193088	1:3916757:T:C	16464	16464	12	12	0.125	0.00126089	0.708701	0.200966	0.117288	0.116637	0.338188	6.35204e-05	0.483955	FALSE
ENSG00000236423.8	188	1.03356	68.7976	30.4669	0.0183664	1:3852667:A:G	-47680	-47680	3	5	0.0520833	0.0140593	0.739125	0.285001	0.707529	0.708295	0.62898	6.55397e-05	0.900085	FALSE
ENSG00000287586.1	88	1.02955	16.4675	29.6335	0.00577747	1:4778574:ATCTCTCTC:A	43579	43579	9	11	0.114583	0.00355495	0.839661	0.267441	0.079992	0.0838377	0.298525	0.000267434	0.427196	FALSE
ENSG00000236948.2	21	1.01008	11.5459	32.357	0.0468015	1:5629642:A:G	-38653	-38653	3	6	0.0625	0.0446381	0.636581	0.304942	0.426757	0.42022	0.52738	0.000340749	0.754693	FALSE
ENSG00000069424.16	156	1.03207	53.1624	29.9904	0.00149409	1:6035102:A:G	44175	44175	19	30	0.3125	0.000856587	-0.469162	0.127944	0.0681932	0.0694565	0.278909	8.4095e-05	0.399125	FALSE
ENSG00000131697.18	159	1.01962	53.7511	29.9729	0.0146663	1:6003595:G:A	11122	11122	26	42	0.5625	0.0103857	-0.365897	0.134624	0.540846	0.538903	0.573076	7.74374e-05	0.820084	FALSE
ENSG00000158286.13	191	1.01146	36.5759	29.3693	0.000222852	1:6198087:C:T	-7388	-7388	21	24	0.25	8.97889e-05	-0.701878	0.157387	0.00729927	0.00764693	0.0970027	0.000108488	0.138813	FALSE
ENSG00000116251.11	201	1.01276	35.6248	29.0242	0.014093	1:6219718:G:T	10329	10329	10	14	0.145833	0.00878531	-0.508537	0.182562	0.393461	0.390713	0.516268	0.000112239	0.738791	FALSE
ENSG00000116237.16	142	0.992525	36.7059	30.0259	0.00148903	1:6221732:C:T	-14240	-14240	10	11	0.114583	0.00085959	-0.882105	0.240639	0.0548945	0.0545685	0.252172	9.65e-05	0.360864	FALSE
ENSG00000158292.7	87	1.01138	24.8	29.8819	0.0305192	1:6252418:T:G	-8680	-8680	21	31	0.322917	0.0228985	0.423966	0.17765	0.536846	0.531063	0.56985	0.00015991	0.815468	FALSE
ENSG00000097021.21	109	0.991719	11.3924	29.5942	0.0927442	1:6440008:C:CA	46241	46241	11	16	0.166667	0.0756124	0.347237	0.189284	0.673033	0.673305	0.617767	0.000309435	0.884039	FALSE
ENSG00000187017.18	150	1.02129	27.7672	28.8885	6.99887e-05	1:6433403:T:C	8627	8627	14	19	0.197917	2.09761e-05	0.72306	0.145885	0.00119988	0.00168512	0.0383173	0.000151326	0.0548328	TRUE
ENSG00000215788.11	92	1.02718	26.1492	29.3833	0.0334207	1:6467273:A:G	1098	1098	20	26	0.270833	0.02406	-0.266573	0.112714	0.583842	0.576757	0.586333	0.000166218	0.839055	FALSE
ENSG00000171680.23	112	1.00013	27.0709	31.2344	0.00489721	1:6524744:A:T	4670	4670	15	18	0.1875	0.00381141	-0.662013	0.212663	0.126687	0.124405	0.347118	0.000137016	0.496733	FALSE
ENSG00000162408.11	134	0.999727	31.2641	30.5606	0.0380679	1:6521817:G:A	-32696	-32696	19	22	0.770833	0.0310368	0.459107	0.203787	0.70493	0.702919	0.62685	0.000118353	0.897037	FALSE
ENSG00000204859.13	121	0.991123	34.7048	31.032	0.00448745	1:6625606:CCG:C	45612	45612	3	6	0.0625	0.00337011	0.387882	0.122749	0.145485	0.147501	0.369894	0.000101194	0.529327	FALSE
ENSG00000116273.6	143	0.994988	36.2535	30.0245	0.00369188	1:6600501:C:T	-13230	-13230	7	8	0.0833333	0.00231871	0.680382	0.206105	0.131687	0.127041	0.350411	9.91809e-05	0.501446	FALSE
ENSG00000162413.17	143	1.04417	35.1477	29.0085	0.00687595	1:6639213:AGTT:A	24606	24606	8	12	0.125	0.00390555	0.252143	0.0812417	0.19958	0.198004	0.406659	0.000136105	0.581938	FALSE
ENSG00000041988.16	144	1.01381	34.7982	29.3994	0.0374148	1:6671441:T:C	46573	46573	5	7	0.0729167	0.0273145	0.468655	0.202924	0.728927	0.729831	0.63373	0.000115614	0.906881	FALSE
ENSG00000007923.17	57	1.02522	16.2011	29.6507	0.0519535	1:6659619:G:A	-42305	-42305	3	5	0.0520833	0.0401615	-0.409917	0.191881	0.566743	0.567426	0.583478	0.000265197	0.83497	FALSE
ENSG00000237436.1	42	0.998025	11.9971	30.6902	0.0631629	1:6821628:A:G	36785	36785	4	5	0.0520833	0.0538821	0.795236	0.397786	0.545045	0.543763	0.575144	0.000305261	0.823044	FALSE
ENSG00000171735.20	42	1.01714	12.7996	31.348	0.0480948	1:6786492:C:T	1038	1038	3	5	0.0520833	0.0424846	-0.532215	0.252183	0.465953	0.459757	0.543979	0.000320334	0.778446	FALSE
ENSG00000049245.13	102	1.0434	37.0001	30.782	0.00763325	1:7734229:A:G	-37067	-37067	3	6	0.0625	0.00571328	0.462894	0.156583	0.230877	0.228758	0.43006	0.000128744	0.615426	FALSE
ENSG00000049246.15	119	1.00742	39.6647	31.0346	0.000396014	1:7830057:T:C	45766	45766	8	12	0.125	0.000257307	0.694933	0.169736	0.0139986	0.0150684	0.139957	9.76792e-05	0.200282	FALSE
ENSG00000236266.1	167	1.04222	48.7783	30.2422	0.00839312	1:7844415:G:A	17073	17073	4	6	0.9375	0.00586462	0.860341	0.292039	0.318068	0.317491	0.483243	9.70328e-05	0.691531	FALSE
ENSG00000049247.14	167	1.02633	47.6833	30.4496	0.0187234	1:7857301:C:T	3789	3789	3	5	0.0520833	0.0143254	0.919202	0.355506	0.589141	0.58218	0.587698	9.07345e-05	0.841009	FALSE
ENSG00000049249.10	98	1.02165	28.6587	30.4045	0.000655353	1:7969442:T:TG	26275	26275	20	27	0.28125	0.000381887	-0.586235	0.148214	0.0146985	0.0169245	0.148097	0.000146926	0.211931	FALSE
ENSG00000116288.13	110	1.0269	30.4713	29.3706	0.00675793	1:7959160:CA:C	4869	4869	27	31	0.322917	0.00405762	0.362844	0.117465	0.179482	0.176683	0.390325	0.000142425	0.558564	FALSE
ENSG00000284747.1	93	1.03208	23.6317	29.2923	0.0804853	1:7987608:G:A	-3526	-3526	4	7	0.0729167	0.0633163	0.562495	0.292709	0.854515	0.855269	0.664678	0.000189112	0.951168	FALSE
ENSG00000116285.13	55	1.01223	15.4261	29.6188	0.0277352	1:7981292:T:G	-45017	-45017	8	13	0.135417	0.0200597	0.562848	0.230343	0.348865	0.346272	0.496486	0.000258319	0.710483	FALSE
ENSG00000162426.16	53	0.994631	17.8586	29.8241	0.0267034	1:8298682:C:T	-19432	-19432	5	5	0.0520833	0.0196652	-0.986047	0.402138	0.392961	0.385879	0.513997	0.000200909	0.735541	FALSE
ENSG00000232912.6	121	0.990158	33.8421	29.2695	0.0382277	1:8380583:G:A	-44062	-44062	8	10	0.104167	0.0276222	0.330938	0.143601	0.730327	0.736108	0.634889	0.000103162	0.90854	FALSE
ENSG00000142599.20	49	1.02551	24.3661	32.6927	0.0545568	1:8864223:A:G	15302	15302	4	7	0.0729167	0.0534164	-0.285805	0.142669	0.740526	0.736375	0.634889	0.000176677	0.90854	FALSE
ENSG00000074800.16	74	1.02133	40.7169	32.3794	0.00136265	1:8906290:T:TA	27100	27100	9	11	0.114583	0.00122306	-0.286489	0.0809838	0.0462954	0.050312	0.246656	0.000103237	0.35297	FALSE
ENSG00000232208.2	121	1.03604	54.1553	32.2357	0.0194882	1:8923626:G:A	15882	15882	7	12	0.125	0.0180784	0.53019	0.213113	0.639636	0.640636	0.606755	8.4428e-05	0.86828	FALSE
ENSG00000131686.15	138	1.04627	58.7873	30.8317	0.000762231	1:8960846:T:C	14979	14979	27	45	0.46875	0.000493414	0.571456	0.147872	0.0340966	0.0372054	0.214068	8.23499e-05	0.306336	FALSE
ENSG00000290109.1	117	1.04189	44.6376	30.5039	0.0596247	1:8923626:G:A	-47618	-47618	7	12	0.125	0.0499595	0.373525	0.18356	0.928107	0.930645	0.682909	0.000105834	0.977257	FALSE
ENSG00000142583.18	103	1.02898	29.8139	30.3202	0.0165376	1:9105626:G:A	17148	17148	8	11	0.114583	0.012344	-0.554644	0.209518	0.388261	0.377889	0.510875	0.000147303	0.731073	FALSE
ENSG00000180758.12	62	1.00897	28.4199	32.1034	0.0299277	1:9143751:C:CTT	14647	14647	3	5	0.0520833	0.0276927	0.796252	0.345678	0.578242	0.574276	0.585293	0.000137577	0.837567	FALSE
ENSG00000234546.5	26	1.01093	11.2598	31.293	0.00907049	1:9147662:G:A	-34342	-34342	10	17	0.822917	0.00734694	-0.567594	0.198666	0.0951905	0.0946873	0.312204	0.00035115	0.446771	FALSE
ENSG00000228526.8	47	1.03671	25.6103	31.806	0.0110479	1:9240509:G:T	41603	41603	5	7	0.0729167	0.00962098	0.955589	0.347623	0.234877	0.232257	0.431688	0.00017913	0.617756	FALSE
ENSG00000049239.13	137	1.01823	53.008	31.6333	0.00155059	1:9247955:G:T	13181	13181	8	12	0.125	0.00122187	-0.595342	0.168272	0.0773923	0.0748477	0.287287	7.78907e-05	0.411113	FALSE
ENSG00000171621.14	196	1.0023	53.585	30.7773	0.00296631	1:9270681:G:C	-22213	-22213	20	22	0.229167	0.0020821	-0.733462	0.21951	0.148285	0.146387	0.369337	7.01307e-05	0.52853	FALSE
ENSG00000171612.7	39	1.01392	8.89649	30.6673	0.0878113	1:9577533:G:A	38068	38068	5	5	0.0520833	0.0764272	-0.861901	0.471205	0.552145	0.552327	0.57834	0.000452179	0.827617	FALSE
ENSG00000188807.13	100	1.00859	35.4989	30.4956	0.0366223	1:9593777:A:G	4866	4866	6	10	0.104167	0.0295995	-0.398203	0.175113	0.727327	0.731012	0.633829	0.0001099	0.907024	FALSE
ENSG00000171608.18	209	1.02325	58.0504	29.2308	0.0133343	1:9644449:C:T	14560	14560	6	8	0.0833333	0.00848956	-0.527293	0.188365	0.534647	0.530382	0.569677	7.32258e-05	0.815221	FALSE
ENSG00000179840.5	252	1.03023	61.5759	28.2019	0.00161891	1:9692590:C:T	38004	38004	28	39	0.59375	0.000639265	0.495857	0.131452	0.0835916	0.0873669	0.303692	7.18523e-05	0.43459	FALSE
ENSG00000231789.4	235	1.02175	55.2924	28.455	0.0284683	1:9683671:G:A	-3912	-3912	34	48	0.5	0.0181734	0.455704	0.183337	0.788921	0.791026	0.6501	7.62142e-05	0.930307	FALSE
ENSG00000171603.18	68	1.00217	18.6833	30.0214	0.0217588	1:9810903:A:T	-13081	-13081	4	8	0.0833333	0.0160635	0.249906	0.0984764	0.341766	0.336004	0.491244	0.000200962	0.702982	FALSE
ENSG00000178585.15	103	1.04623	36.9076	30.0092	0.00879228	1:9954620:C:T	44284	44284	5	7	0.0729167	0.0059683	-0.925241	0.314803	0.261874	0.257989	0.449747	0.000131106	0.643598	FALSE
ENSG00000162441.12	126	1.05555	36.759	29.3624	0.118677	1:9955640:C:T	12233	12233	5	8	0.0833333	0.0977777	-0.346173	0.203151	0.987001	0.989135	0.695649	0.000138536	0.995489	FALSE
ENSG00000173614.14	126	1.03407	37.0293	29.8389	0.0177972	1:9980710:G:A	37282	37282	7	7	0.0729167	0.012626	-0.717402	0.271956	0.475152	0.469422	0.547909	0.00012209	0.78407	FALSE
ENSG00000162444.12	120	1.02185	24.3902	28.6572	0.0487494	1:9980710:G:A	-16496	-16496	7	7	0.0729167	0.0342396	-0.386486	0.174972	0.69953	0.696251	0.624819	0.000172826	0.894129	FALSE
ENSG00000130939.20	95	1.03056	19.5079	28.2614	0.0387655	1:10036084:C:CT	3250	3250	4	5	0.0520833	0.0253507	-0.44922	0.19179	0.529447	0.52345	0.566873	0.000227088	0.811208	FALSE
ENSG00000054523.20	93	1.01444	27.537	30.4536	0.00103992	1:10190549:T:TTTG	-20021	-20021	5	7	0.0729167	0.000635599	0.639111	0.169337	0.0238976	0.026671	0.181864	0.000146631	0.260252	FALSE
ENSG00000284642.1	217	1.01338	40.397	28.4396	0.00289631	1:10347111:T:G	-48305	-48305	5	9	0.09375	0.00131696	0.573081	0.163245	0.105789	0.106805	0.32655	9.93434e-05	0.4673	FALSE
ENSG00000142657.21	219	1.02624	42.5347	28.8949	0.00583135	1:10403592:G:GAA	4998	4998	5	6	0.0625	0.00318222	-0.439419	0.138104	0.210679	0.209665	0.416744	0.000101661	0.59637	FALSE
ENSG00000142655.13	148	1.02506	32.0399	30.1331	0.0542999	1:10489228:G:A	16940	16940	3	5	0.0520833	0.043869	0.457633	0.218378	0.825617	0.82641	0.657232	0.000134034	0.940513	FALSE
ENSG00000160049.12	148	1.04196	32.3771	30.163	0.025501	1:10452452:T:C	-20077	-20077	22	27	0.71875	0.0193844	-0.386819	0.157362	0.556644	0.54761	0.576814	0.00014594	0.825434	FALSE
ENSG00000130940.15	3	0.991387	0.970147	32.7048	0.131109	1:10758328:C:CT	-38322	-38322	9	11	0.114583	0.129357	0.302085	0.194199	0.128687	0.129727	0.352942	0.00363254	0.505068	FALSE
ENSG00000175262.15	107	1.0218	30.0135	30.2136	0.0926109	1:10954061:C:T	-28015	-28015	13	17	0.177083	0.0786044	-0.409602	0.225662	0.940306	0.943667	0.685728	0.000140419	0.981292	FALSE
ENSG00000120948.19	102	1.02483	26.7538	29.8547	0.00304812	1:11027467:G:A	15123	15123	21	31	0.677083	0.00182433	0.281822	0.0831214	0.0714929	0.0729109	0.283753	0.000160291	0.406056	FALSE
ENSG00000009724.18	197	1.0076	30.3974	29.3363	0.00135067	1:11065670:TTTAG:T	18431	18431	5	9	0.09375	0.000668088	0.672633	0.179066	0.0365963	0.0391627	0.219425	0.000127589	0.314002	FALSE
ENSG00000116649.10	206	1.00636	32.0836	29.6555	0.00629273	1:11013450:TCA:T	-46570	-46570	3	5	0.0520833	0.00392057	-0.471562	0.152012	0.182082	0.180955	0.394384	0.000119998	0.564372	FALSE
ENSG00000226849.1	205	1.02372	26.1859	28.3934	0.0024619	1:11039190:G:A	-29281	-29281	6	6	0.0625	0.001082	1.54075	0.430102	0.0557944	0.0579816	0.25822	0.000162724	0.369518	FALSE
ENSG00000171824.14	185	0.994529	21.9513	29.4971	0.00213413	1:11063581:C:A	-36288	-36288	5	6	0.0625	0.00115011	-0.835745	0.234756	0.0477952	0.0466926	0.237637	0.000163348	0.340063	FALSE
ENSG00000198793.14	96	1.02526	33.7623	31.4987	0.00292367	1:11257263:C:T	-5293	-5293	4	7	0.0729167	0.00231283	-0.639256	0.193591	0.0854915	0.0877964	0.303984	0.000127346	0.435007	FALSE
ENSG00000120942.14	88	1.01692	31.684	32.1289	0.00868979	1:11281757:A:G	8559	8559	3	5	0.0520833	0.00781654	0.410314	0.144867	0.238376	0.234462	0.433498	0.000129304	0.620345	FALSE
ENSG00000132879.14	144	1.0186	39.6787	29.2096	0.00657497	1:11634311:T:C	-20064	-20064	17	18	0.8125	0.00383569	-0.514238	0.165321	0.228177	0.222613	0.426034	0.000104273	0.609664	FALSE
ENSG00000116661.11	144	1.03766	37.7111	28.4973	0.0130708	1:11648996:C:CCCAG	-6790	-6790	22	27	0.28125	0.00749848	-0.557241	0.195598	0.380462	0.373153	0.508526	0.000122333	0.727712	FALSE
ENSG00000116663.11	146	1.02931	39.9806	28.9547	0.0221601	1:11631104:G:A	-33096	-33096	35	47	0.489583	0.0144958	-0.201403	0.0780422	0.583042	0.578678	0.586866	0.000110068	0.839818	FALSE
ENSG00000162490.7	172	1.03547	61.4682	29.567	0.00511745	1:11722724:G:C	31014	31014	7	12	0.125	0.00307487	0.703946	0.22034	0.257974	0.255016	0.447373	7.41482e-05	0.6402	FALSE
ENSG00000116670.16	172	1.03224	59.555	29.3952	0.0213994	1:11719705:C:T	27894	27894	6	8	0.0833333	0.0146835	0.472774	0.183578	0.716328	0.712489	0.62958	7.51435e-05	0.900943	FALSE
ENSG00000177674.16	148	1.02341	42.7146	29.257	0.00473742	1:11744231:C:T	8147	8147	11	14	0.145833	0.0026783	-0.299261	0.0921653	0.173283	0.174923	0.389155	9.95994e-05	0.556889	FALSE
ENSG00000215910.8	236	0.999227	65.4127	30.032	0.0147608	1:11809521:T:C	47734	47734	8	14	0.145833	0.0105361	0.56291	0.207558	0.624238	0.622289	0.600841	5.63981e-05	0.859817	FALSE
ENSG00000011021.23	235	1.00926	54.1618	29.6478	0.0185455	1:11827259:C:A	21163	21163	4	7	0.0729167	0.0129122	0.467452	0.177827	0.636936	0.633256	0.603888	7.23216e-05	0.864177	FALSE
ENSG00000177000.13	235	1.0439	50.4147	28.7088	0.00145582	1:11787277:G:GGAA	-19178	-19178	25	39	0.40625	0.000633796	-0.378379	0.100227	0.0616938	0.0619258	0.264535	9.47662e-05	0.378556	FALSE
ENSG00000285646.2	293	1.00818	40.4383	28.9943	0.000178865	1:11915626:T:C	7686	7686	5	8	0.0833333	6.29111e-05	1.02686	0.22412	0.00649935	0.00689935	0.0913247	9.62437e-05	0.130688	FALSE
ENSG00000116685.16	300	1.02187	45.287	29.1363	0.0119015	1:11912754:C:T	-13674	-13674	21	29	0.302083	0.00737857	-0.277803	0.0972931	0.413659	0.407958	0.522853	9.31122e-05	0.748214	FALSE
ENSG00000083444.17	296	1.01194	47.4104	29.4785	0.00780972	1:11949898:C:T	15693	15693	23	32	0.333333	0.00484604	-0.330231	0.109334	0.310669	0.304935	0.477555	8.39364e-05	0.683392	FALSE
ENSG00000116688.18	256	1.04648	53.1132	28.6254	1.42818e-06	1:12012461:G:C	32280	32280	35	47	0.489583	2.19647e-07	-0.870299	0.13378	9.999e-05	4.78428e-05	0.00313986	9.12491e-05	0.00449321	TRUE
ENSG00000116691.11	208	1.00861	45.4503	29.4933	0.0128622	1:11997038:CA:C	-22428	-22428	7	8	0.0833333	0.00844792	-0.466704	0.166603	0.444156	0.440586	0.536834	8.58504e-05	0.768221	FALSE
ENSG00000120949.15	86	1.00637	18.9005	29.0618	0.0602699	1:12048307:T:C	-14996	-14996	10	10	0.104167	0.045059	-0.609112	0.292395	0.688031	0.688709	0.622742	0.000203686	0.891157	FALSE
ENSG00000028137.19	244	1.03774	73.4993	29.7465	0.020121	1:12128370:T:C	-38621	-38621	4	6	0.0625	0.0142904	-0.335584	0.129738	0.768223	0.763429	0.641753	6.2812e-05	0.918363	FALSE
ENSG00000048707.15	137	1.00519	42.1349	29.8253	0.0125501	1:12202632:G:A	-27398	-27398	17	20	0.208333	0.00859223	-0.335979	0.120229	0.416058	0.410132	0.523266	9.07415e-05	0.748805	FALSE
ENSG00000162496.9	105	1.01713	46.4902	30.6569	0.00162495	1:12574951:C:G	-43259	-43259	3	5	0.0520833	0.00107	-0.669845	0.186777	0.0670933	0.0691481	0.278023	8.82408e-05	0.397858	FALSE
ENSG00000116731.23	41	1.04734	16.4601	30.7309	0.0158033	1:13706848:A:G	6660	6660	4	5	0.0520833	0.0123384	0.473757	0.17895	0.210479	0.211665	0.417635	0.000295524	0.597645	FALSE
ENSG00000189337.17	80	0.965681	10.3569	32.391	0.0605962	1:13868627:T:C	-24165	-24165	4	7	0.0729167	0.0581912	0.466744	0.237841	0.486551	0.49296	0.557012	0.000289373	0.797096	FALSE
[truncated: 15,503 more rows]

## Sheet: TableS15
Table S15: Cis-eQTL results for T2 timepoint from TensorQTL permutation analysis with significant cis-eGenes (FDR < 0.1) labelled
[truncated: 15,796 more rows]

## Sheet: TableS16
Table S16: Cis-eQTL results for T3 timepoint from TensorQTL permutation analysis with significant cis-eGenes (FDR < 0.1) labelled
[truncated: 15,997 more rows]

[truncated: 1 more sheets: TableS17]
