# Supplementary material for: Genetic control of the transcriptional response to active tuberculosis disease and treatment
Source: Research Square preprint supplement (doi:10.21203/rs.3.rs-7311967/v1), 2025-08-29
Supplement: Supplementary file 3 [file 692aeaa509fed35e215dc0bf.xlsx]

## Sheet: Contents
Genetic control of the transcriptional response to tuberculosis disease and treatment
John F. O'Grady, Alexander S. Leonard, Houcheng Li, Lingzhao Fang, Hubert Pausch, Isobel C. Gormley, Stephen V. Gordon, David E. MacHugh*
* Corresponding author: David E. MacHugh
Corresponding author email address:			david.machugh@ucd.ie
Supplementary data
Worksheet 1		SRR Run IDs, related to Figure 1
Worksheet 2		Sample Metadata, related to Figure 1 and Figure S1
Worksheet 3		RNA-seq QC results, related to Figure 1 and S2
Worksheet 4		Genotype concordance results, related to Figure 2 and S3
Worksheet 5		SRR IDs used for merging, related to Figure 2 and S3-5
Worksheet 6		Differential expression (DE) results, related to Figure 3
Worksheet 7		Gprofiler Overrepresentation results of DE Genes, related to Figure 3
Worksheet 8		Covariates used for eQTL mapping of T0 samples, related to Figure 4 and S6-7
Worksheet 9		Covariates used for eQTL mapping of T1 samples, related to Figure 4 and S6-7
Worksheet 10		Covariates used for eQTL mapping of T2 samples, related to Figure 4 and S6-7
Worksheet 11		Covariates used for eQTL mapping of T3 samples, related to Figure 4 and S6-7
Worksheet 12		Covariates used for eQTL mapping of T4 samples, related to Figure 4 and S6-7

## Sheet: Table S1
Table S1: Patient and SRR Run IDs for whole blood RNA-seq data from Tabone et al., (2021)
Patient ID	SRR Timepoint T0	SRR Timepoint T1	SRR Timepoint T2	SRR Timepoint T3	SRR Timepoint T4
1	SRR12609770	SRR12609772	SRR12609774	SRR12609775	SRR12609776
3	SRR12609780	SRR12609781	SRR12609783	SRR12609784	SRR12609787
13	SRR12609800	SRR12609801	SRR12609803	SRR12609804	SRR12609805
29	SRR12609808	SRR12609809	SRR12609812	SRR12609813	SRR12609814
36	SRR12609817	SRR12609818	SRR12609820	SRR12609821	SRR12609822
75	SRR12609394	SRR12609395	SRR12609397	SRR12609399	SRR12609401
76	SRR12609405	SRR12609406	SRR12609409	SRR12609411	SRR12609412
83	SRR12609414	SRR12609415	SRR12609418	SRR12609420	SRR12609422
84	SRR12609425	SRR12609426	SRR12609429	SRR12609431	SRR12609433
85	SRR12609434	SRR12609435	SRR12609438	SRR12609439	SRR12609440
87	SRR12609855	SRR12609856	SRR12609859	SRR12609861	SRR12609863
92	SRR12609449	SRR12609450	SRR12609453	SRR12609454	SRR12609457
99	SRR12609489	SRR12609866	SRR12609869	SRR12609871	SRR12609872
105	SRR12609475	SRR12609476	SRR12609480	SRR12609482	SRR12609484
117	SRR12609875	SRR12609876	SRR12609880	SRR12609882	SRR12609883
124	SRR12609885	SRR12609886	SRR12609890	SRR12609892	SRR12609894
127	SRR12609897	SRR12609898	SRR12609901	SRR12609903	SRR12609905
136	SRR12609910	SRR12609911	SRR12609914	SRR12609916	SRR12609918
137	SRR12609922	SRR12609923	SRR12609926	SRR12609928	SRR12609930
146	SRR12609934	SRR12609935	SRR12609938	SRR12609940	SRR12609942
157	SRR12609495	SRR12609496	SRR12609499	SRR12609501	SRR12609503
175	SRR12609506	SRR12609507	SRR12609509	SRR12609511	SRR12609513
176	SRR12609516	SRR12609517	SRR12609520	SRR12609522	SRR12609523
201	SRR12609526	SRR12609527	SRR12609530	SRR12609531	SRR12609533
203	SRR12609535	SRR12609536	SRR12609539	SRR12609541	SRR12609543
221	SRR12609546	SRR12609547	SRR12609550	SRR12609551	SRR12609552
227	SRR12609574	SRR12609575	SRR12609578	SRR12609580	SRR12609581
254	SRR12609974	SRR12609975	SRR12609978	SRR12609980	SRR12609981
256	SRR12609982	SRR12609983	SRR12609986	SRR12609988	SRR12609990
257	SRR12609994	SRR12609995	SRR12609998	SRR12610000	SRR12610001
258	SRR12610003	SRR12610004	SRR12610007	SRR12610009	SRR12610011
265	SRR12610014	SRR12610015	SRR12610018	SRR12610020	SRR12610021
266	SRR12610053	SRR12610054	SRR12610057	SRR12609587	SRR12609589
268	SRR12609595	SRR12609596	SRR12609599	SRR12609601	SRR12609603
278	SRR12609608	SRR12609609	SRR12609612	SRR12609614	SRR12609616
294	SRR12609626	SRR12609627	SRR12609629	SRR12609634	SRR12609636
297	SRR12609641	SRR12609642	SRR12609645	SRR12609647	SRR12609649
302	SRR12609676	SRR12609677	SRR12609680	SRR12610058	SRR12610060
327	SRR12610032	SRR12610033	SRR12610036	SRR12610037	SRR12610038
335	SRR12610063	SRR12610064	SRR12610066	SRR12610068	SRR12610069
348	SRR12610071	SRR12610072	SRR12610075	SRR12610077	SRR12610079
367	SRR12609651	SRR12609652	SRR12609655	SRR12609656	SRR12609658
371	SRR12610092	SRR12610093	SRR12610096	SRR12610098	SRR12610101
389	SRR12610115	SRR12610116	SRR12610119	SRR12610121	SRR12610122
395	SRR12610123	SRR12610124	SRR12610127	SRR12610129	SRR12610131
400	SRR12610148	SRR12610149	SRR12610152	SRR12609682	SRR12609684
432	SRR12609687	SRR12609688	SRR12609691	SRR12609693	SRR12609694
461	SRR12609696	SRR12609697	SRR12609700	SRR12609702	SRR12609704

## Sheet: Table S2
Table S2: Sample metadata for all n = 48 patients including day of sampling
Patient ID	Age (Years)	Birth Place	Culture Result	Reported Ethnicity	Gender	TB Group	Interferon Gamma Release Assay (IGRA) result	Smear Result	Subgroup for diagnosis	Resistance	Subgroup for anti-TB therapy	Response Group	Days from Treatment Commencement (T0)	Days from Treatment Commencement (T1)	Days from Treatment Commencement (T2)	Days from Treatment Commencement (T3)	Days from Treatment Commencement (T4)
P_1	29	Foreign Born	Positive	South Asia (ISC)	male	PTB	Pos	Positive	TB Drug Resistance	Z	TB Drug Resistance	stronger_delayed	-1	18	60	181	285
P_3	25	Foreign Born	Positive	South Asia (ISC)	male	PTB	Pos	Negative	TB Drug Resistance	H	TB Drug Resistance	weaker	-1	13	62	125	306
P_13	47	Foreign Born	Positive	South Asia (ISC)	male	PTB	Pos	Negative	PTB Culture Positive	None	Long_ATT	similar	-1	15	55	174	230
P_29	42	Foreign Born	Positive	South Asia (ISC)	male	PTB	Pos	Positive	PTB Culture Positive	None	Long_ATT	stronger_initial	-1	6	55	180	253
P_36	25	Foreign Born	Positive	South Asia (ISC)	female	PTB	Pos	Positive	PTB Culture Positive	None	Long_ATT	stronger_delayed	-1	13	55	167	224
P_75	41	Foreign Born	Positive	Central Europe (Poland)	male	PTB	Pos	Negative	TB Drug Resistance	H, E	TB Drug Resistance	weaker	0	6	53	159	284
P_76	30	Foreign Born	Positive	South Asia (ISC)	male	PTB	Pos	Negative	PTB Culture Positive	None	Short_ATT	stronger_delayed	-1	7	56	159	350
P_83	36	Foreign Born	Positive	South Asia (Sri Lanka)	female	PTB	Pos	Positive	PTB Culture Positive	None	Long_ATT	weaker	-1	6	48	163	279
P_84	21	Foreign Born	Positive	East African (Sudan)	male	PTB	Pos	Negative	PTB Culture Positive	None	Short_ATT	similar	-3	4	53	171	362
P_85	34	Foreign Born	Positive	East African (Somalia)	female	PTB	Pos	Positive	PTB Culture Positive	None	Short_ATT	similar	-1	7	55	126	197
P_87	54	Foreign Born	Positive	South Asia (ISC)	male	TB_Prog_Contact	Pos	Positive	Other TB Progressor	None	Long_ATT	weaker	-1	8	46	154	273
P_92	47	UK Born	Positive	British	male	PTB	Pos	Positive	PTB Culture Positive	None	Long_ATT	stronger_delayed	-1	6	55	167	286
P_99	40	Foreign Born	Positive	South Asia (ISC)	male	PTB	Pos	Positive	PTB Culture Positive	None	Long_ATT	stronger_initial	-1	6	54	168	239
P_105	67	Foreign Born	Positive	South Asia (ISC)	female	PTB	Pos	Positive	PTB Culture Positive	None	Long_ATT	stronger_delayed	-1	6	56	149	262
P_117	35	Foreign Born	Positive	South Asia (ISC)	male	PTB	Pos	Negative	PTB Culture Positive	None	Short_ATT	stronger_delayed	-3	6	52	165	347
P_124	31	Foreign Born	Positive	South Asia (ISC)	female	PTB	Pos	Positive	PTB Culture Positive	None	Long_ATT	stronger_initial	-1	6	55	162	295
P_127	26	Foreign Born	Positive	South Asia (ISC)	female	PTB	Pos	Negative	PTB Culture Positive	None	Long_ATT	stronger_delayed	-2	5	54	160	293
P_136	39	Foreign Born	Positive	East African (Somalia)	male	PTB	Pos	Negative	PTB Culture Positive	None	Long_ATT	similar	-1	7	56	179	292
P_137	38	Foreign Born	Positive	South Asia (ISC)	female	PTB	Pos	Positive	PTB Culture Positive	None	Long_ATT	stronger_delayed	-1	8	54	166	278
P_146	46	UK Born	Positive	British	male	PTB	Pos	Positive	Difficult TB Cases	None	Difficult TB Cases	similar	-1	7	53	166	277
P_157	25	Foreign Born	Positive	South Asia (ISC)	female	PTB	Pos	Negative	PTB Culture Positive	None	Long_ATT	stronger_delayed	-1	6	55	167	280
P_175	43	Foreign Born	Positive	South Asia (ISC)	male	PTB	Pos	Positive	PTB Culture Positive	None	Long_ATT	similar	-1	7	35	159	277
P_176	39	Foreign Born	Positive	East African (Somalia)	male	PTB	Pos	Positive	PTB Culture Positive	None	Long_ATT	stronger_initial	-3	6	54	163	229
P_201	32	Foreign Born	Positive	South Asia (ISC)	female	PTB	Pos	Positive	PTB Culture Positive	None	Short_ATT	weaker	-1	7	56	141	364
P_203	21	Foreign Born	Positive	Central Africa (Cameroon)	male	PTB	Pos	Negative	PTB Culture Positive	None	Long_ATT	weaker	-1	9	55	167	301
P_221	44	Foreign Born	Positive	East African (Somalia)	male	PTB	Pos	Negative	Difficult TB Cases	None	Difficult TB Cases	similar	-5	8	53	107	281
P_227	25	Foreign Born	Positive	East Africa (Somalia)	female	TB_Prog_Contact	Pos	Negative	Other TB Progressor	None	Short_ATT	stronger_delayed	-1	6	56	157	325
P_254	21	UK Born	Positive	British Indian	male	PTB	Pos	Negative	PTB Culture Positive	None	Short_ATT	weaker	-1	6	55	167	351
P_256	41	UK Born	Positive	British	male	PTB	Pos	Negative	Outbreak TB strain	None	Outbreak TB strain	similar	-5	7	56	176	303
P_257	39	Foreign Born	Positive	East African (Somalia)	male	PTB	Pos	Negative	PTB Culture Positive	None	Short_ATT	similar	-1	6	54	170	357
P_258	30	UK Born	Positive	British	female	TB_Prog_Contact	Pos	Negative	Outbreak TB strain	None	Outbreak TB strain	similar	0	7	56	168	287
P_265	40	Foreign Born	Positive	South Asia (ISC)	female	PTB	Pos	Negative	PTB Culture Positive	None	Short_ATT	weaker	-1	5	51	192	368
P_266	39	UK Born	Positive	British	male	TB_Prog	Pos	Negative	Outbreak TB strain	None	Outbreak TB strain	similar	0	8	57	158	286
P_268	35	UK Born	Positive	British	female	TB_Prog	Pos	Negative	Outbreak TB strain	None	Outbreak TB strain	weaker	0	8	57	158	286
P_278	32	UK Born	Positive	British	male	TB_Prog_Contact	Pos	Negative	Outbreak TB strain	None	Outbreak TB strain	weaker	-2	7	56	168	280
P_294	47	UK Born	Positive	British	male	TB_Prog_Contact	Pos	Negative	Outbreak TB strain	None	Outbreak TB strain	weaker	-5	9	43	158	273
P_297	35	UK Born	Positive	British	male	PTB	Pos	Negative	PTB Culture Positive	None	Long_ATT	similar	-3	7	56	167	283
P_302	58	UK Born	Positive	British	male	PTB	Pos	Negative	PTB Culture Positive	None	Long_ATT	similar	-6	7	57	169	274
P_327	32	Foreign Born	Positive	South Asia (Pakistan)	female	PTB	Pos	Positive	PTB Culture Positive	None	Long_ATT	stronger_initial	-1	7	56	112	230
P_335	37	Foreign Born	Positive	East African (Zimbabwe)	male	PTB	Pos	Negative	PTB Culture Positive	None	Short_ATT	similar	-2	16	55	160	342
P_348	27	UK Born	Positive	British	female	TB_Prog_Contact	Pos	Negative	Other TB Progressor	None	Long_ATT	weaker	-4	7	61	168	287
P_367	23	UK Born	Positive	British	male	PTB	Pos	Positive	Outbreak TB strain	None	Outbreak TB strain	similar	-6	7	56	161	301
P_371	65	Foreign Born	Positive	South Asia (ISC)	male	PTB	Pos	Positive	PTB Culture Positive	None	Long_ATT	similar	-1	8	54	165	293
P_389	28	Foreign Born	Positive	East African (Somalia)	female	PTB	Pos	Positive	PTB Culture Positive	None	Long_ATT	similar	-1	7	55	168	245
P_395	21	Foreign Born	Positive	South Africa	female	PTB	Pos	Positive	PTB Culture Positive	None	Long_ATT	weaker	-1	7	53	172	297
P_400	53	Foreign Born	Positive	South Asia (ISC)	male	PTB	Pos	Positive	PTB Culture Positive	None	Long_ATT	weaker	-1	6	56	166	298
P_432	55	Foreign Born	Positive	South Asia (ISC)	male	PTB	Pos	Negative	Difficult TB Cases	None	Difficult TB Cases	weaker	-1	7	55	159	197
P_461	30	UK Born	Positive	British	female	PTB	Pos	Positive	PTB Culture Positive	None	Long_ATT	similar	-1	5	55	165	277

## Sheet: Table S3
Table S3: RNA-seq alignment summary statistics
Patient_ID	Run	Number of reads post trimming /input for alignment	Uniquely mapped reads number	Uniquely mapped reads (%)	Number of reads mapped to multiple loci	Number of reads mapped to multiple loci %	Number of reads mapped to too many loci	Number of reads mapped to too many loci %	Number of reads unmapped: too short	Number of reads unmapped: too short %	Number of reads unmapped: other	Number of reads unmapped: other %
1	SRR12609770	22520532	14977381	0.6651	3443133	0.1529	275045	0.0122	3795044	0.1685	29929	0.0013
3	SRR12609780	27118927	17313419	0.6384	4649553	0.1715	288906	0.0107	4845442	0.1787	21607	0.0008
13	SRR12609800	23763533	10987710	0.4624	7763442	0.3267	137065	0.0058	4858429	0.2044	16887	0.0007
29	SRR12609808	22591826	14603857	0.6464	4147661	0.1836	219508	0.0097	3593425	0.1591	27375	0.0012
36	SRR12609817	23163642	14587981	0.6298	4069247	0.1757	223748	0.0097	4237870	0.183	44796	0.0019
75	SRR12609394	21018233	13879672	0.6604	2649547	0.1261	149082	0.0071	4314250	0.2053	25682	0.0012
76	SRR12609405	25409804	16901428	0.6652	4576650	0.1801	177437	0.007	3729418	0.1468	24871	0.001
83	SRR12609414	35172749	26898429	0.7648	6754870	0.192	250876	0.0071	1219818	0.0347	48756	0.0014
84	SRR12609425	22243342	14901345	0.6699	3609365	0.1623	144136	0.0065	3573339	0.1606	15157	0.0007
85	SRR12609434	24992257	16039693	0.6418	3576572	0.1431	174067	0.007	5174069	0.207	27856	0.0011
87	SRR12609855	26567013	18289126	0.6884	4009093	0.1509	168076	0.0063	4074342	0.1534	26376	0.001
92	SRR12609449	23935754	17124803	0.7154	2696842	0.1127	151755	0.0063	3942014	0.1647	20340	0.0008
99	SRR12609489	23703845	15574159	0.657	3348676	0.1413	172655	0.0073	4569131	0.1928	39224	0.0017
105	SRR12609475	31959603	22628064	0.708	5856825	0.1833	302809	0.0095	3147945	0.0985	23960	0.0007
117	SRR12609875	27074373	17891169	0.6608	4060358	0.15	228732	0.0084	4862500	0.1796	31614	0.0012
124	SRR12609885	25419830	17677693	0.6954	3070505	0.1208	178551	0.007	4463188	0.1756	29893	0.0012
127	SRR12609897	24816094	17170264	0.6919	3439606	0.1386	314077	0.0127	3854891	0.1553	37256	0.0015
136	SRR12609910	35922315	26002189	0.7238	6801816	0.1893	264498	0.0074	2809868	0.0782	43944	0.0012
137	SRR12609922	25133461	16703061	0.6646	3514833	0.1398	237015	0.0094	4654864	0.1852	23688	0.0009
146	SRR12609934	28040053	18590896	0.663	4985225	0.1778	156466	0.0056	4282599	0.1527	24867	0.0009
157	SRR12609495	25848104	18740907	0.725	5607280	0.2169	243126	0.0094	1227786	0.0475	29005	0.0011
175	SRR12609506	31936762	21594317	0.6762	5728374	0.1794	329018	0.0103	4253786	0.1332	31267	0.001
176	SRR12609516	22172895	15447537	0.6967	3299900	0.1488	199403	0.009	3196619	0.1442	29436	0.0013
201	SRR12609526	31556879	18271722	0.579	11303720	0.3582	176964	0.0056	1783137	0.0565	21336	0.0007
203	SRR12609535	25742396	15579746	0.6052	7407828	0.2878	117820	0.0046	2621293	0.1018	15709	0.0006
221	SRR12609546	28245666	18468219	0.6538	4702356	0.1665	170217	0.006	4874851	0.1726	30023	0.0011
227	SRR12609574	29418445	20727288	0.7046	3387510	0.1151	186301	0.0063	5095827	0.1732	21519	0.0007
254	SRR12609974	32844112	15518949	0.4725	13277777	0.4043	210258	0.0064	3823236	0.1164	13892	0.0004
256	SRR12609982	30236681	18899645	0.6251	7548964	0.2497	273754	0.0091	3492802	0.1155	21516	0.0007
257	SRR12609994	28707300	14413247	0.5021	10893257	0.3795	203984	0.0071	3182125	0.1108	14687	0.0005
258	SRR12610003	25080824	14637814	0.5836	6766459	0.2698	169412	0.0068	3488252	0.1391	18887	0.0008
265	SRR12610014	28164192	16878404	0.5993	7613311	0.2703	194915	0.0069	3445550	0.1223	32012	0.0011
266	SRR12610053	26477955	16361267	0.6179	5866934	0.2216	196626	0.0074	4037542	0.1525	15586	0.0006
268	SRR12609595	24904339	15405001	0.6186	5987379	0.2404	136437	0.0055	3355725	0.1347	19797	0.0008
278	SRR12609608	25883003	16433805	0.6349	6115838	0.2363	134485	0.0052	3180343	0.1229	18532	0.0007
294	SRR12609626	23672320	14726248	0.6221	5808551	0.2454	126893	0.0054	2995204	0.1265	15424	0.0007
297	SRR12609641	26840975	15039301	0.5603	8031910	0.2992	146894	0.0055	3606954	0.1344	15916	0.0006
302	SRR12609676	30702333	18744015	0.6105	7469573	0.2433	279471	0.0091	4178104	0.1361	31170	0.001
327	SRR12610032	33589785	19630857	0.5844	8255215	0.2458	295885	0.0088	5376328	0.1601	31500	0.0009
335	SRR12610063	31524224	19178497	0.6084	8561485	0.2716	189968	0.006	3574624	0.1134	19650	0.0006
348	SRR12610071	29146916	19886586	0.6823	5875642	0.2016	136488	0.0047	3227709	0.1107	20491	0.0007
367	SRR12609651	27246082	17525074	0.6432	7514141	0.2758	201645	0.0074	1979769	0.0727	25453	0.0009
371	SRR12610092	29952784	21376735	0.7137	6488921	0.2166	303235	0.0101	1756576	0.0586	27317	0.0009
389	SRR12610115	29064197	16495925	0.5676	10519348	0.3619	155729	0.0054	1865249	0.0642	27946	0.001
395	SRR12610123	28491001	17959051	0.6303	8478337	0.2976	167972	0.0059	1849946	0.0649	35695	0.0013
400	SRR12610148	20153301	12469418	0.6187	4886787	0.2425	102259	0.0051	2673701	0.1327	21136	0.001
432	SRR12609687	31529938	18421888	0.5843	7839521	0.2486	196755	0.0062	5047631	0.1601	24143	0.0008
461	SRR12609696	34053261	14063669	0.413	15208873	0.4466	257875	0.0076	4501969	0.1322	20875	0.0006
1	SRR12609772	22391786	12042449	0.5378	4837619	0.216	231847	0.0104	5254246	0.2347	25625	0.0011
3	SRR12609781	36185556	17341343	0.4792	13344064	0.3688	132057	0.0036	5344398	0.1477	23694	0.0007
13	SRR12609801	23936512	14693908	0.6139	5865260	0.245	136856	0.0057	3221941	0.1346	18547	0.0008
29	SRR12609809	24656558	15561477	0.6311	5520833	0.2239	196605	0.008	3351545	0.1359	26098	0.0011
36	SRR12609818	23979934	16204445	0.6758	2753199	0.1148	194050	0.0081	4796070	0.2	32170	0.0013
75	SRR12609395	26262768	17707677	0.6743	3748672	0.1427	190750	0.0073	4582360	0.1745	33309	0.0013
76	SRR12609406	27370036	5826592	0.2129	17116632	0.6254	182897	0.0067	4235193	0.1547	8722	0.0003
83	SRR12609415	29379863	20573711	0.7003	4106624	0.1398	171660	0.0058	4489589	0.1528	38279	0.0013
84	SRR12609426	25150241	16120759	0.641	4483744	0.1783	158082	0.0063	4371681	0.1738	15975	0.0006
85	SRR12609435	31864897	14271807	0.4479	14934555	0.4687	155108	0.0049	2484006	0.078	19421	0.0006
87	SRR12609856	24655896	16467792	0.6679	3485105	0.1413	157926	0.0064	4521383	0.1834	23690	0.001
92	SRR12609450	26348612	18718807	0.7104	4072432	0.1546	133031	0.005	3405943	0.1293	18399	0.0007
99	SRR12609866	25939422	17234645	0.6644	4454691	0.1717	169542	0.0065	4041666	0.1558	38878	0.0015
105	SRR12609476	28442712	19998174	0.7031	3693640	0.1299	334631	0.0118	4388126	0.1543	28141	0.001
117	SRR12609876	25808288	17666979	0.6845	3901433	0.1512	231108	0.009	3976221	0.1541	32547	0.0013
124	SRR12609886	31865343	12736987	0.3997	17398449	0.546	89257	0.0028	1627932	0.0511	12718	0.0004
127	SRR12609898	27128309	18676522	0.6885	3299779	0.1216	317377	0.0117	4795562	0.1768	39069	0.0014
136	SRR12609911	26512690	20581130	0.7763	3089066	0.1165	182591	0.0069	2634937	0.0994	24966	0.0009
137	SRR12609923	24476696	16859204	0.6888	3381110	0.1381	221456	0.009	3993075	0.1631	21851	0.0009
146	SRR12609935	23704905	17626453	0.7436	2793206	0.1178	154805	0.0065	3102561	0.1309	27880	0.0012
157	SRR12609496	23073326	14034470	0.6083	5661163	0.2454	174908	0.0076	3178736	0.1378	24049	0.001
175	SRR12609507	36091159	24232666	0.6714	10317151	0.2859	331367	0.0092	1183262	0.0328	26713	0.0007
176	SRR12609517	34441141	20252085	0.588	11821836	0.3432	179850	0.0052	2163897	0.0628	23473	0.0007
201	SRR12609527	28393511	19432486	0.6844	6025012	0.2122	158956	0.0056	2756929	0.0971	20128	0.0007
203	SRR12609536	31832426	19712844	0.6193	9122720	0.2866	119564	0.0038	2861853	0.0899	15445	0.0005
221	SRR12609547	27868745	16962843	0.6087	5549535	0.1991	130803	0.0047	5177254	0.1858	48310	0.0017
227	SRR12609575	25138570	13667040	0.5437	7276811	0.2895	123870	0.0049	4056915	0.1614	13934	0.0006
254	SRR12609975	32593799	19128053	0.5869	9351813	0.2869	247652	0.0076	3847725	0.1181	18556	0.0006
256	SRR12609983	30372809	17953723	0.5911	8101554	0.2667	220206	0.0073	4076712	0.1342	20614	0.0007
257	SRR12609995	26035974	16738147	0.6429	5743374	0.2206	220352	0.0085	3315696	0.1274	18405	0.0007
258	SRR12610004	28173307	14628285	0.5192	9303389	0.3302	138554	0.0049	4085473	0.145	17606	0.0006
265	SRR12610015	25919673	18595713	0.7174	4942407	0.1907	211858	0.0082	2118304	0.0817	51391	0.002
266	SRR12610054	24431620	11620896	0.4756	8683601	0.3554	158187	0.0065	3956297	0.1619	12639	0.0005
268	SRR12609596	25710935	14080793	0.5477	7811176	0.3038	158187	0.0062	3641455	0.1416	19324	0.0008
278	SRR12609609	25360109	16344810	0.6445	5520169	0.2177	120257	0.0047	3358584	0.1324	16289	0.0006
294	SRR12609627	23390933	14089060	0.6023	5775734	0.2469	141689	0.0061	3365882	0.1439	18568	0.0008
297	SRR12609642	23768693	16860429	0.7094	5147628	0.2166	147151	0.0062	1599796	0.0673	13689	0.0006
302	SRR12609677	33336754	23763693	0.7128	7024094	0.2107	256968	0.0077	2259370	0.0678	32629	0.001
327	SRR12610033	31119229	19128352	0.6147	7435565	0.2389	231569	0.0074	4299618	0.1382	24125	0.0008
335	SRR12610064	26199563	14054085	0.5364	10622494	0.4054	119297	0.0046	1392880	0.0532	10807	0.0004
348	SRR12610072	28762513	16757343	0.5826	4591334	0.1596	123832	0.0043	7265853	0.2526	24151	0.0008
367	SRR12609652	27477908	14296386	0.5203	9290923	0.3381	156225	0.0057	3713664	0.1352	20710	0.0008
371	SRR12610093	24670339	13742831	0.5571	7873894	0.3192	179507	0.0073	2856562	0.1158	17545	0.0007
389	SRR12610116	33610022	23515337	0.6997	6258837	0.1862	199447	0.0059	3592268	0.1069	44133	0.0013
395	SRR12610124	28646550	14461838	0.5048	10076153	0.3517	171134	0.006	3908694	0.1364	28731	0.001
400	SRR12610149	33647494	8565260	0.2546	20849693	0.6197	235815	0.007	3985126	0.1184	11600	0.0003
432	SRR12609688	28484646	17783917	0.6243	6088602	0.2138	200263	0.007	4390466	0.1541	21398	0.0008
461	SRR12609697	28657881	11765089	0.4105	13913662	0.4855	155805	0.0054	2807167	0.098	16158	0.0006
1	SRR12609774	23731963	15353479	0.647	3803491	0.1603	252372	0.0106	4294352	0.181	28269	0.0012
3	SRR12609783	30093956	20387113	0.6774	5851760	0.1944	288660	0.0096	3541987	0.1177	24436	0.0008
13	SRR12609803	27573922	17141874	0.6217	4992519	0.1811	157769	0.0057	5258547	0.1907	23213	0.0008
29	SRR12609812	26315041	16896401	0.6421	4110909	0.1562	221605	0.0084	5058270	0.1922	27856	0.0011
36	SRR12609820	28719945	18624973	0.6485	5645836	0.1966	202595	0.0071	4214979	0.1468	31562	0.0011
75	SRR12609397	23977916	16400123	0.684	3912117	0.1632	190460	0.0079	3447048	0.1438	28168	0.0012
76	SRR12609409	22757128	15116708	0.6643	3862991	0.1697	136755	0.006	3619761	0.1591	20913	0.0009
83	SRR12609418	24655541	17281736	0.7009	2481784	0.1007	142851	0.0058	4713978	0.1912	35192	0.0014
84	SRR12609429	24331071	16299702	0.6699	3531562	0.1451	115177	0.0047	4369437	0.1796	15193	0.0006
85	SRR12609438	25874960	16620281	0.6423	3613065	0.1396	104889	0.0041	5516908	0.2132	19817	0.0008
87	SRR12609859	26206225	16314156	0.6225	3678458	0.1404	149136	0.0057	6039627	0.2305	24848	0.0009
92	SRR12609453	28864844	19533818	0.6767	3407451	0.118	173595	0.006	5727639	0.1984	22341	0.0008
99	SRR12609869	32132602	12504597	0.3892	17793977	0.5538	127678	0.004	1686461	0.0525	19889	0.0006
105	SRR12609480	26570541	16431629	0.6184	7563903	0.2847	189318	0.0071	2357215	0.0887	28476	0.0011
117	SRR12609880	25028865	17685984	0.7066	3408001	0.1362	223258	0.0089	3682817	0.1471	28805	0.0012
124	SRR12609890	28761640	17126806	0.5955	5770892	0.2006	148948	0.0052	5686428	0.1977	28566	0.001
127	SRR12609901	24387913	16216314	0.6649	3554606	0.1458	266831	0.0109	4318691	0.1771	31471	0.0013
136	SRR12609914	29679606	20575682	0.6933	3634919	0.1225	262851	0.0089	5167069	0.1741	39085	0.0013
137	SRR12609926	31805985	22447579	0.7058	6747363	0.2121	203282	0.0064	2381658	0.0749	26103	0.0008
146	SRR12609938	32309289	21830644	0.6757	5692490	0.1762	174370	0.0054	4574833	0.1416	36952	0.0011
157	SRR12609499	35773020	23856065	0.6669	10159731	0.284	263151	0.0074	1461014	0.0408	33059	0.0009
175	SRR12609509	26504713	17117481	0.6458	6250763	0.2358	234848	0.0089	2871172	0.1083	30449	0.0011
176	SRR12609520	22828947	13132126	0.5752	6219069	0.2724	120417	0.0053	3335459	0.1461	21876	0.001
201	SRR12609530	26714068	15393985	0.5763	6238604	0.2335	147302	0.0055	4912444	0.1839	21733	0.0008
203	SRR12609539	28850680	17548478	0.6083	6573644	0.2279	114343	0.004	4597131	0.1593	17084	0.0006
221	SRR12609550	30074155	20277410	0.6742	7538749	0.2507	128154	0.0043	2101106	0.0699	28736	0.001
227	SRR12609578	34878163	16719294	0.4794	15675942	0.4494	155536	0.0045	2309190	0.0662	18201	0.0005
254	SRR12609978	29896615	16156588	0.5404	9633571	0.3222	183363	0.0061	3908586	0.1307	14507	0.0005
256	SRR12609986	25783620	15526842	0.6022	5068451	0.1966	198688	0.0077	4972260	0.1928	17379	0.0007
257	SRR12609998	26265187	14708649	0.56	7985762	0.304	171099	0.0065	3381905	0.1288	17772	0.0007
258	SRR12610007	28726737	19975284	0.6954	7206428	0.2509	184567	0.0064	1336066	0.0465	24392	0.0008
265	SRR12610018	23779351	7029983	0.2956	12154350	0.5111	138157	0.0058	4443723	0.1869	13138	0.0006
266	SRR12610057	25548298	14658644	0.5738	7580508	0.2967	152259	0.006	3145182	0.1231	11705	0.0005
268	SRR12609599	28894448	16550812	0.5728	8210093	0.2841	142734	0.0049	3970998	0.1374	19811	0.0007
278	SRR12609612	24502732	11756880	0.4798	6565801	0.268	127452	0.0052	6038134	0.2464	14465	0.0006
294	SRR12609629	31109195	16966915	0.5454	10207844	0.3281	167907	0.0054	3747353	0.1205	19176	0.0006
297	SRR12609645	20139034	10449039	0.5188	6209697	0.3083	82923	0.0041	3386638	0.1682	10737	0.0005
302	SRR12609680	31817876	14182086	0.4457	13883007	0.4363	213745	0.0067	3519429	0.1106	19609	0.0006
327	SRR12610036	33561323	18732037	0.5581	10916539	0.3253	183217	0.0055	3708397	0.1105	21133	0.0006
335	SRR12610066	26587937	9551531	0.3592	13981688	0.5259	169062	0.0064	2876669	0.1082	8987	0.0003
348	SRR12610075	26314442	18065236	0.6865	5032849	0.1913	121743	0.0046	3076518	0.1169	18096	0.0007
367	SRR12609655	28355038	15643084	0.5517	8425673	0.2971	154174	0.0054	4110019	0.1449	22088	0.0008
371	SRR12610096	25817771	15445890	0.5983	8172317	0.3165	159086	0.0062	2022231	0.0783	18247	0.0007
389	SRR12610119	27771901	17154968	0.6177	7318294	0.2635	140750	0.0051	3132340	0.1128	25549	0.0009
395	SRR12610127	29598412	12833294	0.4336	13092013	0.4423	156227	0.0053	3492276	0.118	24602	0.0008
400	SRR12610152	28866571	13509705	0.468	10649739	0.3689	147490	0.0051	4540751	0.1573	18886	0.0007
432	SRR12609691	26739108	16927279	0.6331	4861525	0.1818	168279	0.0063	4760851	0.178	21174	0.0008
461	SRR12609700	28612934	21237325	0.7422	5494139	0.192	167498	0.0059	1689038	0.059	24934	0.0009
1	SRR12609775	24585450	14855344	0.6042	4910188	0.1997	178029	0.0072	4619104	0.1879	22785	0.0009
3	SRR12609784	28575557	18123812	0.6342	6320011	0.2212	237924	0.0083	3871032	0.1355	22778	0.0008
13	SRR12609804	22896034	14198761	0.6201	4690603	0.2049	117300	0.0051	3872970	0.1692	16400	0.0007
29	SRR12609813	24633201	14105797	0.5726	6892085	0.2798	154093	0.0063	3460343	0.1405	20883	0.0008
36	SRR12609821	26655582	17659778	0.6625	4028971	0.1511	161518	0.0061	4777339	0.1792	27976	0.001
75	SRR12609399	24623498	14150901	0.5747	2831824	0.115	151174	0.0061	7455768	0.3028	33831	0.0014
76	SRR12609411	27425407	12427821	0.4531	8989957	0.3278	122683	0.0045	5868130	0.214	16816	0.0006
83	SRR12609420	25245405	10393468	0.4117	9717171	0.3849	127469	0.005	4990715	0.1977	16582	0.0007
84	SRR12609431	27397069	17402092	0.6352	4811284	0.1756	102712	0.0037	5066371	0.1849	14610	0.0005
85	SRR12609439	26878834	18418890	0.6853	3685010	0.1371	108273	0.004	4646961	0.1729	19700	0.0007
87	SRR12609861	27924216	18699438	0.6696	4976132	0.1782	169097	0.0061	4057225	0.1453	22324	0.0008
92	SRR12609454	30104409	16089612	0.5345	5145349	0.1709	130917	0.0043	8721438	0.2897	17093	0.0006
99	SRR12609871	28152430	18852722	0.6697	6160513	0.2188	152905	0.0054	2953851	0.1049	32439	0.0012
105	SRR12609482	33471089	21117881	0.6309	9782713	0.2923	227730	0.0068	2323570	0.0694	19195	0.0006
117	SRR12609882	29201789	18866023	0.6461	4747458	0.1626	191478	0.0066	5371034	0.1839	25796	0.0009
124	SRR12609892	22847771	14683729	0.6427	3408944	0.1492	101067	0.0044	4634448	0.2028	19583	0.0009
127	SRR12609903	24279556	17270581	0.7113	4014793	0.1654	256443	0.0106	2706818	0.1115	30921	0.0013
136	SRR12609916	28658451	19510258	0.6808	4242242	0.148	190587	0.0067	4686557	0.1635	28807	0.001
137	SRR12609928	28879552	18776513	0.6502	8472859	0.2934	174528	0.006	1433829	0.0496	21823	0.0008
146	SRR12609940	26755596	18604041	0.6953	3567607	0.1333	165302	0.0062	4388217	0.164	30429	0.0011
157	SRR12609501	34070033	26583906	0.7803	4585833	0.1346	228310	0.0067	2643911	0.0776	28073	0.0008
175	SRR12609511	32291645	23931629	0.7411	7077559	0.2192	275687	0.0085	982794	0.0304	23976	0.0007
176	SRR12609522	28234339	19233091	0.6812	5815041	0.206	141969	0.005	3020446	0.107	23792	0.0008
201	SRR12609531	28432655	18610683	0.6546	5397529	0.1898	152010	0.0053	4250293	0.1495	22140	0.0008
203	SRR12609541	27853304	14785532	0.5308	8424373	0.3025	115917	0.0042	4513836	0.1621	13646	0.0005
221	SRR12609551	26463275	17248548	0.6518	4946165	0.1869	137154	0.0052	4112286	0.1554	19122	0.0007
227	SRR12609580	29716965	14165830	0.4767	14413287	0.485	115538	0.0039	1009051	0.034	13259	0.0004
254	SRR12609980	28452226	15930723	0.5599	8041103	0.2826	146728	0.0052	4309194	0.1515	24478	0.0009
256	SRR12609988	25656391	15839573	0.6174	6164559	0.2403	160054	0.0062	3476286	0.1355	15919	0.0006
257	SRR12610000	27228431	15345987	0.5636	7652649	0.2811	165652	0.0061	4047735	0.1487	16408	0.0006
258	SRR12610009	31762533	15803177	0.4975	10650730	0.3353	159738	0.005	5132152	0.1616	16736	0.0005
265	SRR12610020	29387894	15416509	0.5246	9768880	0.3324	152926	0.0052	4024165	0.1369	25414	0.0009
266	SRR12609587	21264974	9820631	0.4618	8629280	0.4058	119329	0.0056	2686770	0.1263	8964	0.0004
268	SRR12609601	30106707	14067857	0.4673	12144291	0.4034	156757	0.0052	3723373	0.1237	14429	0.0005
278	SRR12609614	25379634	12967538	0.5109	8873261	0.3496	121585	0.0048	3404075	0.1341	13175	0.0005
294	SRR12609634	27305886	17256959	0.632	7775983	0.2848	140021	0.0051	2117942	0.0776	14981	0.0005
297	SRR12609647	25376268	15039162	0.5926	7181414	0.283	126441	0.005	3015584	0.1188	13667	0.0005
302	SRR12610058	27247194	19478504	0.7149	4567373	0.1676	213801	0.0078	2960976	0.1087	26540	0.001
327	SRR12610037	28679987	17397545	0.6066	7839885	0.2734	202506	0.0071	3220989	0.1123	19062	0.0007
335	SRR12610068	27296047	16115016	0.5904	7151562	0.262	150310	0.0055	3864023	0.1416	15136	0.0006
348	SRR12610077	26305451	12415017	0.472	12036641	0.4576	107133	0.0041	1734597	0.0659	12063	0.0005
367	SRR12609656	29976255	16345170	0.5453	9102753	0.3037	144589	0.0048	4362716	0.1455	21027	0.0007
371	SRR12610098	24377583	14662939	0.6015	6431363	0.2638	154580	0.0063	3111618	0.1276	17083	0.0007
389	SRR12610121	26895637	16506323	0.6137	7190667	0.2674	106848	0.004	3069079	0.1141	22720	0.0008
395	SRR12610129	29899955	18796421	0.6286	7077466	0.2367	132503	0.0044	3859183	0.1291	34382	0.0011
400	SRR12609682	31606025	17964875	0.5684	12100639	0.3829	159351	0.005	1362178	0.0431	18982	0.0006
432	SRR12609693	30250558	17532792	0.5796	8003197	0.2646	157106	0.0052	4539718	0.1501	17745	0.0006
461	SRR12609702	21801178	13433584	0.6162	6274318	0.2878	110718	0.0051	1966404	0.0902	16154	0.0007
1	SRR12609776	23610038	15406867	0.6526	4988389	0.2113	178401	0.0076	3009928	0.1275	26453	0.0011
3	SRR12609787	29009528	16738476	0.577	7759631	0.2675	252728	0.0087	4234805	0.146	23888	0.0008
13	SRR12609805	24412301	15352998	0.6289	5834803	0.239	123565	0.0051	3083703	0.1263	17232	0.0007
29	SRR12609814	27033553	17140330	0.634	5947874	0.22	171477	0.0063	3750334	0.1387	23538	0.0009
36	SRR12609822	31392977	21351047	0.6801	5614634	0.1789	196114	0.0062	4200744	0.1338	30438	0.001
75	SRR12609401	26741172	17947250	0.6711	7296768	0.2729	199963	0.0075	1262961	0.0472	34230	0.0013
76	SRR12609412	28388594	18709013	0.659	4530576	0.1596	131658	0.0046	4998226	0.1761	19121	0.0007
83	SRR12609422	32213637	20407936	0.6335	8830756	0.2741	164139	0.0051	2781671	0.0864	29135	0.0009
84	SRR12609433	22393613	14611398	0.6525	3882202	0.1734	97572	0.0044	3789498	0.1692	12943	0.0006
85	SRR12609440	29829551	24341126	0.816	3434953	0.1152	154014	0.0052	1876265	0.0629	23193	0.0008
87	SRR12609863	37898946	25844406	0.6819	6834069	0.1803	215815	0.0057	4972324	0.1312	32332	0.0009
92	SRR12609457	26267060	18198677	0.6928	5461529	0.2079	114796	0.0044	2477103	0.0943	14955	0.0006
99	SRR12609872	24258326	17690857	0.7293	3065844	0.1264	135580	0.0056	3337075	0.1376	28970	0.0012
105	SRR12609484	28765355	21523733	0.7483	4684104	0.1628	225465	0.0078	2309917	0.0803	22136	0.0008
117	SRR12609883	26921458	17436848	0.6477	3802276	0.1412	173532	0.0064	5483513	0.2037	25289	0.0009
124	SRR12609894	29282717	21380712	0.7301	6859598	0.2343	121552	0.0042	891217	0.0304	29638	0.001
127	SRR12609905	20724031	13653432	0.6588	2678590	0.1293	175598	0.0085	4191829	0.2023	24582	0.0012
136	SRR12609918	30009167	21458093	0.7151	3990679	0.133	170653	0.0057	4365535	0.1455	24207	0.0008
137	SRR12609930	27907622	20367904	0.7298	3909059	0.1401	188471	0.0068	3418585	0.1225	23603	0.0008
146	SRR12609942	33212829	24041275	0.7239	4218260	0.127	177242	0.0053	4742316	0.1428	33736	0.001
157	SRR12609503	34754494	23503503	0.6763	9334310	0.2686	206723	0.0059	1687439	0.0486	22519	0.0006
175	SRR12609513	27952829	20335716	0.7275	4758097	0.1702	213041	0.0076	2619836	0.0937	26139	0.0009
176	SRR12609523	31950136	18211465	0.57	12796559	0.4005	116767	0.0037	809762	0.0253	15583	0.0005
201	SRR12609533	30901947	17347878	0.5614	9659320	0.3126	164759	0.0053	3712957	0.1202	17033	0.0006
203	SRR12609543	29798682	20267419	0.6801	7179430	0.2409	128131	0.0043	2203711	0.074	19991	0.0007
221	SRR12609552	24038217	15285706	0.6359	4198391	0.1747	106577	0.0044	4429101	0.1843	18442	0.0008
227	SRR12609581	24386664	11358155	0.4658	8383607	0.3438	112067	0.0046	4520022	0.1853	12813	0.0005
254	SRR12609981	34173748	22109765	0.647	10115284	0.296	218028	0.0064	1713633	0.0501	17038	0.0005
256	SRR12609990	24675050	15471748	0.627	6067460	0.2459	166650	0.0068	2954801	0.1197	14391	0.0006
257	SRR12610001	31489284	15481296	0.4916	11289582	0.3585	189235	0.006	4512849	0.1433	16322	0.0005
258	SRR12610011	27500602	14200279	0.5164	9592514	0.3488	124816	0.0045	3568952	0.1298	14041	0.0005
265	SRR12610021	31026858	18882645	0.6086	6802924	0.2193	194457	0.0063	5115201	0.1649	31631	0.001
266	SRR12609589	28681331	11675057	0.4071	13229369	0.4613	167268	0.0058	3599037	0.1255	10600	0.0004
268	SRR12609603	27629544	17284925	0.6256	6599041	0.2388	157579	0.0057	3566333	0.1291	21666	0.0008
278	SRR12609616	27115928	16056434	0.5921	7805837	0.2879	115679	0.0043	3120751	0.1151	17227	0.0006
294	SRR12609636	24613590	14202930	0.577	6465794	0.2627	140092	0.0057	3786278	0.1538	18496	0.0008
297	SRR12609649	28300823	16982107	0.6001	7276981	0.2571	120130	0.0042	3906904	0.138	14701	0.0005
302	SRR12610060	27724649	19308479	0.6964	4533204	0.1635	240643	0.0087	3614557	0.1304	27766	0.001
327	SRR12610038	29125453	17133480	0.5883	8190221	0.2812	165372	0.0057	3616704	0.1242	19676	0.0007
335	SRR12610069	28792910	17239513	0.5987	8984113	0.312	151895	0.0053	2401485	0.0834	15904	0.0006
348	SRR12610079	19389517	9045213	0.4665	8032455	0.4143	90746	0.0047	2209463	0.114	11640	0.0006
367	SRR12609658	27452674	15113412	0.5505	8561212	0.3119	120283	0.0044	3642999	0.1327	14768	0.0005
371	SRR12610101	24634584	11081120	0.4498	10622814	0.4312	123622	0.005	2793778	0.1134	13250	0.0005
389	SRR12610122	28872914	19222480	0.6658	6994118	0.2422	118157	0.0041	2514407	0.0871	23752	0.0008
395	SRR12610131	26473148	12947189	0.4891	10191109	0.385	128686	0.0049	3180047	0.1201	26117	0.001
400	SRR12609684	25061556	15910492	0.6349	6992518	0.279	125689	0.005	2010528	0.0802	22329	0.0009
432	SRR12609694	25067765	14841629	0.5921	6792881	0.271	119498	0.0048	3299173	0.1316	14584	0.0006
461	SRR12609704	28807635	11780190	0.4089	12155671	0.422	165147	0.0057	4683728	0.1626	22899	0.0008
	MEAN	2.76595e+07	1.68725e+07	0.610399	6.96766e+06	0.248974	173901	0.00630875	3.62264e+06	0.133491	22852.3	0.0008325
	SD	3.40846e+06	3.32338e+06	0.0929051	3.18993e+06	0.100771	50990.1	0.00175984	1.21851e+06	0.0474384	7672.16	0.000285101

## Sheet: TableS4
Table S4: Genotype concordance between samples across each timepoint
	T0VT1	T0VT2	T0VT3	T0VT4	T1VT0	T1VT2	T1VT3	T3VT4	T2VT0	T2VT1	T2VT3	T2VT4	T3VT0	T3VT1	T3VT2	T3VT4	T4VT0	T4VT1	T4VT2	T4VT3
P_1	0.982	0.979	0.985	0.982	0.984	0.989	0.99	0.99	0.981	0.99	0.989	0.987	0.985	0.989	0.988	0.99	0.982	0.988	0.986	0.989
P_3	0.886	0.993	0.992	0.993	0.889	0.893	0.89	0.894	0.992	0.892	0.991	0.991	0.992	0.886	0.991	0.989	0.993	0.895	0.991	0.989
P_13	0.984	0.984	0.979	0.983	0.985	0.994	0.992	0.996	0.984	0.994	0.991	0.994	0.978	0.993	0.991	0.991	0.982	0.996	0.994	0.99
P_29	0.991	0.992	0.99	0.991	0.993	0.994	0.993	0.994	0.992	0.993	0.993	0.995	0.99	0.992	0.993	0.994	0.991	0.995	0.994	0.993
P_36	0.988	0.988	0.986	0.988	0.99	0.996	0.994	0.995	0.989	0.995	0.995	0.995	0.987	0.994	0.995	0.994	0.988	0.995	0.994	0.994
P_75	0.993	0.993	0.992	0.988	0.993	0.992	0.991	0.986	0.994	0.992	0.991	0.984	0.992	0.992	0.991	0.981	0.987	0.987	0.985	0.982
P_76	0.987	0.995	0.992	0.995	0.985	0.987	0.983	0.988	0.995	0.989	0.991	0.996	0.992	0.984	0.991	0.99	0.995	0.987	0.995	0.989
P_83	0.985	0.99	0.989	0.989	0.987	0.993	0.992	0.991	0.991	0.992	0.995	0.996	0.99	0.991	0.996	0.995	0.991	0.992	0.997	0.995
P_84	0.979	0.981	0.98	0.98	0.979	0.992	0.991	0.992	0.981	0.992	0.993	0.992	0.98	0.993	0.993	0.993	0.981	0.993	0.993	0.993
P_85	0.99	0.985	0.99	0.992	0.99	0.988	0.994	0.995	0.985	0.987	0.987	0.988	0.99	0.994	0.987	0.995	0.993	0.995	0.989	0.995
P_87	0.994	0.995	0.995	0.99	0.994	0.994	0.995	0.992	0.994	0.994	0.994	0.988	0.995	0.995	0.994	0.989	0.99	0.991	0.989	0.99
P_92	0.996	0.996	0.994	0.993	0.996	0.997	0.994	0.995	0.996	0.997	0.995	0.995	0.995	0.994	0.995	0.993	0.994	0.994	0.995	0.992
P_99	0.987	0.982	0.979	0.981	0.987	0.992	0.993	0.996	0.983	0.992	0.991	0.992	0.979	0.994	0.991	0.995	0.983	0.996	0.992	0.995
P_105	0.995	0.989	0.993	0.996	0.995	0.99	0.99	0.995	0.989	0.991	0.985	0.988	0.993	0.99	0.984	0.993	0.997	0.995	0.988	0.994
P_117	0.988	0.986	0.985	0.987	0.988	0.995	0.993	0.995	0.987	0.994	0.993	0.993	0.984	0.993	0.994	0.992	0.987	0.995	0.993	0.991
P_124	0.985	0.977	0.986	0.988	0.986	0.979	0.984	0.986	0.977	0.98	0.975	0.976	0.985	0.982	0.973	0.983	0.989	0.985	0.975	0.985
P_127	0.992	0.984	0.992	0.992	0.991	0.986	0.993	0.992	0.983	0.987	0.983	0.983	0.992	0.993	0.982	0.992	0.991	0.991	0.982	0.991
P_136	0.99	0.988	0.988	0.983	0.991	0.994	0.995	0.991	0.988	0.993	0.994	0.989	0.988	0.996	0.994	0.991	0.983	0.991	0.99	0.99
P_137	0.994	0.992	0.99	0.992	0.994	0.995	0.991	0.994	0.992	0.995	0.994	0.993	0.99	0.992	0.995	0.992	0.991	0.994	0.994	0.992
P_146	0.995	0.996	0.996	0.995	0.996	0.997	0.996	0.995	0.996	0.996	0.996	0.995	0.996	0.996	0.995	0.995	0.995	0.995	0.995	0.995
P_157	0.911	0.915	0.916	0.915	0.911	0.995	0.995	0.993	0.912	0.995	0.995	0.995	0.912	0.995	0.995	0.994	0.912	0.994	0.995	0.995		Overall Concordance
P_175	0.994	0.99	0.996	0.995	0.995	0.991	0.994	0.994	0.99	0.991	0.989	0.988	0.996	0.994	0.988	0.994	0.994	0.994	0.988	0.994		MEAN	0.989943
P_176	0.995	0.994	0.994	0.995	0.995	0.994	0.995	0.996	0.995	0.994	0.995	0.995	0.994	0.995	0.995	0.995	0.994	0.995	0.995	0.994		SD	0.0124524
P_201	0.988	0.985	0.988	0.991	0.989	0.987	0.991	0.992	0.985	0.987	0.987	0.988	0.989	0.992	0.988	0.991	0.991	0.993	0.988	0.991
P_203	0.99	0.992	0.991	0.992	0.99	0.993	0.991	0.992	0.992	0.992	0.992	0.993	0.991	0.991	0.992	0.992	0.993	0.993	0.994	0.992
P_221	0.988	0.985	0.984	0.983	0.988	0.994	0.993	0.993	0.985	0.995	0.993	0.993	0.984	0.994	0.993	0.991	0.984	0.992	0.992	0.991
P_227	0.992	0.991	0.991	0.98	0.991	0.991	0.986	0.981	0.99	0.991	0.987	0.978	0.989	0.987	0.987	0.972	0.978	0.98	0.979	0.971
P_254	0.993	0.995	0.992	0.995	0.993	0.994	0.992	0.994	0.994	0.993	0.993	0.993	0.992	0.992	0.993	0.993	0.995	0.993	0.995	0.994
P_256	0.995	0.997	0.995	0.996	0.995	0.996	0.992	0.992	0.997	0.996	0.994	0.995	0.996	0.993	0.995	0.996	0.996	0.992	0.996	0.996
P_257	0.994	0.994	0.994	0.994	0.994	0.994	0.993	0.994	0.993	0.993	0.994	0.994	0.995	0.994	0.994	0.994	0.994	0.994	0.994	0.994
P_258	0.991	0.993	0.992	0.993	0.992	0.995	0.994	0.994	0.993	0.994	0.992	0.994	0.992	0.994	0.992	0.994	0.992	0.994	0.993	0.994
P_265	0.994	0.982	0.993	0.994	0.992	0.983	0.992	0.994	0.983	0.982	0.98	0.98	0.994	0.993	0.979	0.995	0.994	0.993	0.98	0.995
P_266	0.996	0.996	0.995	0.994	0.996	0.996	0.995	0.994	0.996	0.995	0.995	0.995	0.996	0.995	0.995	0.994	0.994	0.994	0.995	0.994
P_268	0.993	0.994	0.993	0.995	0.994	0.996	0.995	0.995	0.994	0.996	0.995	0.996	0.994	0.995	0.995	0.996	0.996	0.995	0.996	0.996
P_278	0.993	0.995	0.995	0.996	0.995	0.995	0.994	0.994	0.995	0.994	0.994	0.995	0.995	0.993	0.995	0.995	0.995	0.995	0.996	0.995
P_294	0.993	0.993	0.993	0.994	0.994	0.994	0.993	0.994	0.994	0.995	0.995	0.996	0.994	0.993	0.995	0.995	0.995	0.994	0.996	0.995
P_297	0.994	0.989	0.993	0.979	0.995	0.992	0.993	0.981	0.988	0.991	0.986	0.973	0.993	0.994	0.987	0.977	0.978	0.981	0.972	0.977
P_302	0.989	0.986	0.986	0.987	0.99	0.995	0.995	0.996	0.987	0.996	0.993	0.993	0.987	0.995	0.992	0.995	0.988	0.996	0.993	0.995
P_327	0.992	0.991	0.99	0.99	0.993	0.995	0.995	0.994	0.99	0.994	0.994	0.994	0.99	0.995	0.994	0.993	0.99	0.993	0.994	0.993
P_335	0.992	0.993	0.994	0.995	0.993	0.99	0.992	0.993	0.992	0.99	0.992	0.993	0.995	0.992	0.993	0.995	0.995	0.993	0.993	0.995
P_348	0.992	0.992	0.99	0.988	0.992	0.995	0.994	0.993	0.993	0.995	0.994	0.993	0.991	0.995	0.994	0.989	0.987	0.993	0.992	0.988
P_367	0.994	0.995	0.993	0.992	0.994	0.996	0.995	0.994	0.995	0.995	0.995	0.993	0.994	0.995	0.994	0.994	0.992	0.994	0.994	0.994
P_371	0.995	0.995	0.994	0.994	0.997	0.996	0.994	0.995	0.996	0.996	0.995	0.994	0.995	0.994	0.993	0.995	0.994	0.995	0.994	0.995
P_389	0.994	0.993	0.992	0.993	0.994	0.994	0.992	0.994	0.993	0.994	0.994	0.995	0.992	0.993	0.994	0.995	0.992	0.994	0.995	0.994
P_395	0.991	0.983	0.984	0.985	0.991	0.993	0.993	0.993	0.985	0.992	0.987	0.988	0.984	0.993	0.986	0.988	0.985	0.994	0.988	0.989
P_400	0.981	0.976	0.975	0.977	0.979	0.992	0.993	0.994	0.975	0.992	0.993	0.991	0.977	0.993	0.992	0.994	0.976	0.994	0.992	0.994
P_432	0.995	0.996	0.994	0.997	0.995	0.996	0.994	0.997	0.996	0.995	0.995	0.996	0.995	0.995	0.995	0.996	0.996	0.996	0.996	0.996
P_461	0.994	0.994	0.995	0.992	0.994	0.994	0.995	0.992	0.994	0.994	0.996	0.994	0.995	0.995	0.996	0.994	0.991	0.992	0.993	0.994
MEAN	0.987167	0.988312	0.988646	0.988521	0.987583	0.990687	0.9905	0.990708	0.988354	0.990458	0.991667	0.991146	0.988833	0.990667	0.991542	0.991937	0.988417	0.990625	0.991229	0.991854
SD	0.0192921	0.0121167	0.0117699	0.0120601	0.0190485	0.0148541	0.0150474	0.0146461	0.0124653	0.0149125	0.0043532	0.00546162	0.0123828	0.0156672	0.00467205	0.00479985	0.0124761	0.0145216	0.00558204	0.00479357

## Sheet: TableS5
Table S5: SRR IDs merged prior to final variant call
Patient ID	SRR Timepoint T0	SRR Timepoint T1	SRR Timepoint T2	SRR Timepoint T3	SRR Timepoint T4
1	SRR12609770	SRR12609772	SRR12609774	SRR12609775	SRR12609776
3	SRR12609780	NA	SRR12609783	SRR12609784	SRR12609787
13	SRR12609800	SRR12609801	SRR12609803	SRR12609804	SRR12609805
29	SRR12609808	SRR12609809	SRR12609812	SRR12609813	SRR12609814
36	SRR12609817	SRR12609818	SRR12609820	SRR12609821	SRR12609822
75	SRR12609394	SRR12609395	SRR12609397	SRR12609399	SRR12609401
76	SRR12609405	SRR12609406	SRR12609409	SRR12609411	SRR12609412
83	SRR12609414	SRR12609415	SRR12609418	SRR12609420	SRR12609422
84	SRR12609425	SRR12609426	SRR12609429	SRR12609431	SRR12609433
85	SRR12609434	SRR12609435	SRR12609438	SRR12609439	SRR12609440
87	SRR12609855	SRR12609856	SRR12609859	SRR12609861	SRR12609863
92	SRR12609449	SRR12609450	SRR12609453	SRR12609454	SRR12609457
99	SRR12609489	SRR12609866	SRR12609869	SRR12609871	SRR12609872
105	SRR12609475	SRR12609476	SRR12609480	SRR12609482	SRR12609484
117	SRR12609875	SRR12609876	SRR12609880	SRR12609882	SRR12609883
124	SRR12609885	SRR12609886	SRR12609890	SRR12609892	SRR12609894
127	SRR12609897	SRR12609898	SRR12609901	SRR12609903	SRR12609905
136	SRR12609910	SRR12609911	SRR12609914	SRR12609916	SRR12609918
137	SRR12609922	SRR12609923	SRR12609926	SRR12609928	SRR12609930
146	SRR12609934	SRR12609935	SRR12609938	SRR12609940	SRR12609942
157	NA	SRR12609496	SRR12609499	SRR12609501	SRR12609503
175	SRR12609506	SRR12609507	SRR12609509	SRR12609511	SRR12609513
176	SRR12609516	SRR12609517	SRR12609520	SRR12609522	SRR12609523
201	SRR12609526	SRR12609527	SRR12609530	SRR12609531	SRR12609533
203	SRR12609535	SRR12609536	SRR12609539	SRR12609541	SRR12609543
221	SRR12609546	SRR12609547	SRR12609550	SRR12609551	SRR12609552
227	SRR12609574	SRR12609575	SRR12609578	SRR12609580	SRR12609581
254	SRR12609974	SRR12609975	SRR12609978	SRR12609980	SRR12609981
256	SRR12609982	SRR12609983	SRR12609986	SRR12609988	SRR12609990
257	SRR12609994	SRR12609995	SRR12609998	SRR12610000	SRR12610001
258	SRR12610003	SRR12610004	SRR12610007	SRR12610009	SRR12610011
265	SRR12610014	SRR12610015	SRR12610018	SRR12610020	SRR12610021
266	SRR12610053	SRR12610054	SRR12610057	SRR12609587	SRR12609589
268	SRR12609595	SRR12609596	SRR12609599	SRR12609601	SRR12609603
278	SRR12609608	SRR12609609	SRR12609612	SRR12609614	SRR12609616
294	SRR12609626	SRR12609627	SRR12609629	SRR12609634	SRR12609636
297	SRR12609641	SRR12609642	SRR12609645	SRR12609647	SRR12609649
302	SRR12609676	SRR12609677	SRR12609680	SRR12610058	SRR12610060
327	SRR12610032	SRR12610033	SRR12610036	SRR12610037	SRR12610038
335	SRR12610063	SRR12610064	SRR12610066	SRR12610068	SRR12610069
348	SRR12610071	SRR12610072	SRR12610075	SRR12610077	SRR12610079
367	SRR12609651	SRR12609652	SRR12609655	SRR12609656	SRR12609658
371	SRR12610092	SRR12610093	SRR12610096	SRR12610098	SRR12610101
389	SRR12610115	SRR12610116	SRR12610119	SRR12610121	SRR12610122
395	SRR12610123	SRR12610124	SRR12610127	SRR12610129	SRR12610131
400	SRR12610148	SRR12610149	SRR12610152	SRR12609682	SRR12609684
432	SRR12609687	SRR12609688	SRR12609691	SRR12609693	SRR12609694
461	SRR12609696	SRR12609697	SRR12609700	SRR12609702	SRR12609704

## Sheet: TableS6
Table S6: Differential Expression results for each contrast
Gene ID	Gene Name	Base Mean	log2FoldChange	lfcSE	stat	pvalue	padj	significant	diffexpressed	Contrast
ENSG00000227232.5	WASH7P	415.892	0.0882554	0.0541568	0	1	1	FALSE	Not DE	T1_V_T0
ENSG00000238009.6	ENSG00000238009	62.5806	-0.29362	0.127193	-0.736045	0.461703	1	FALSE	Not DE	T1_V_T0
ENSG00000268903.1	ENSG00000268903	1850.9	-0.0634297	0.11741	0	1	1	FALSE	Not DE	T1_V_T0
ENSG00000269981.1	ENSG00000269981	1167.84	-0.229763	0.117051	-0.254271	0.799286	1	FALSE	Not DE	T1_V_T0
ENSG00000241860.7	ENSG00000241860	28.0586	0.0509755	0.151	0	1	1	FALSE	Not DE	T1_V_T0
ENSG00000279928.2	DDX11L17	12.1874	-0.085142	0.202867	0	1	1	FALSE	Not DE	T1_V_T0
ENSG00000279457.4	WASH9P	359.336	0.0123256	0.0534742	0	1	1	FALSE	Not DE	T1_V_T0
ENSG00000228463.10	ENSG00000228463	35.8387	-0.103489	0.110992	0	1	1	FALSE	Not DE	T1_V_T0
ENSG00000290385.1	ENSG00000290385	108.555	0.0207059	0.118344	0	1	1	FALSE	Not DE	T1_V_T0
ENSG00000230021.10	ENSG00000230021	198.175	0.194253	0.0948535	0	1	1	FALSE	Not DE	T1_V_T0
ENSG00000225972.1	MTND1P23	1271.67	0.226594	0.170198	0.156252	0.875834	1	FALSE	Not DE	T1_V_T0
ENSG00000225630.1	MTND2P28	847.927	-0.0956865	0.120996	0	1	1	FALSE	Not DE	T1_V_T0
ENSG00000237973.1	MTCO1P12	1243.9	0.0679318	0.117282	0	1	1	FALSE	Not DE	T1_V_T0
ENSG00000229344.1	MTCO2P12	202.342	-0.0504251	0.172841	0	1	1	FALSE	Not DE	T1_V_T0
ENSG00000248527.1	MTATP6P1	5256.66	-0.132067	0.0984597	0	1	1	FALSE	Not DE	T1_V_T0
ENSG00000198744.5	MTCO3P12	86.2206	0.0453074	0.170702	0	1	1	FALSE	Not DE	T1_V_T0
ENSG00000237491.10	LINC01409	18.2132	0.168272	0.119135	0	1	1	FALSE	Not DE	T1_V_T0
ENSG00000228794.12	LINC01128	109.92	0.183902	0.0582667	0	1	1	FALSE	Not DE	T1_V_T0
ENSG00000188976.11	NOC2L	849.874	-0.0428115	0.0476869	0	1	1	FALSE	Not DE	T1_V_T0
ENSG00000187961.15	KLHL17	252.38	0.0941631	0.057176	0	1	1	FALSE	Not DE	T1_V_T0
ENSG00000187583.11	PLEKHN1	34.1269	-0.0204162	0.103703	0	1	1	FALSE	Not DE	T1_V_T0
ENSG00000272512.1	ENSG00000272512	24.1976	0.429691	0.197214	1.16468	0.24415	1	FALSE	Not DE	T1_V_T0
ENSG00000188290.11	HES4	119.278	0.298648	0.162466	0.607194	0.543722	1	FALSE	Not DE	T1_V_T0
ENSG00000187608.10	ISG15	4925.03	-0.703846	0.194293	-2.59322	0.00950819	0.37627	FALSE	Not DE	T1_V_T0
ENSG00000188157.15	AGRN	131.332	-0.241791	0.136114	-0.307029	0.758821	1	FALSE	Not DE	T1_V_T0
ENSG00000131591.18	C1orf159	317.517	0.107178	0.0598739	0	1	1	FALSE	Not DE	T1_V_T0
ENSG00000223823.1	LINC01342	10.05	-0.159931	0.182242	0	1	1	FALSE	Not DE	T1_V_T0
ENSG00000186891.14	TNFRSF18	162.944	0.198773	0.0985121	0	1	1	FALSE	Not DE	T1_V_T0
ENSG00000186827.12	TNFRSF4	210.605	0.0990949	0.0846526	0	1	1	FALSE	Not DE	T1_V_T0
ENSG00000078808.20	SDF4	1930.04	-0.100617	0.0423262	0	1	1	FALSE	Not DE	T1_V_T0
ENSG00000176022.7	B3GALT6	297.249	-0.0725892	0.0617473	0	1	1	FALSE	Not DE	T1_V_T0
ENSG00000184163.3	C1QTNF12	31.8009	0.0599521	0.121341	0	1	1	FALSE	Not DE	T1_V_T0
ENSG00000160087.21	UBE2J2	1153.95	-0.0462011	0.046422	0	1	1	FALSE	Not DE	T1_V_T0
ENSG00000230415.1	LINC01786	13.2036	0.225489	0.144585	0.176291	0.860065	1	FALSE	Not DE	T1_V_T0
ENSG00000162572.21	SCNN1D	117.652	0.22032	0.0816147	0.248978	0.803378	1	FALSE	Not DE	T1_V_T0
ENSG00000131584.19	ACAP3	1634.61	0.19449	0.0539373	0	1	1	FALSE	Not DE	T1_V_T0
ENSG00000169972.13	PUSL1	176.182	0.0765189	0.0663353	0	1	1	FALSE	Not DE	T1_V_T0
ENSG00000127054.22	INTS11	1837.04	0.0195377	0.0531597	0	1	1	FALSE	Not DE	T1_V_T0
ENSG00000224051.7	CPTP	519.022	-0.120251	0.0682795	0	1	1	FALSE	Not DE	T1_V_T0
ENSG00000169962.5	TAS1R3	39.2305	-0.110327	0.100252	0	1	1	FALSE	Not DE	T1_V_T0
ENSG00000107404.21	DVL1	418.937	0.0335877	0.0519718	0	1	1	FALSE	Not DE	T1_V_T0
ENSG00000162576.17	MXRA8	14.3098	0.401177	0.190475	1.05618	0.290884	1	FALSE	Not DE	T1_V_T0
ENSG00000175756.14	AURKAIP1	1397.69	-0.13571	0.0752188	0	1	1	FALSE	Not DE	T1_V_T0
ENSG00000221978.13	CCNL2	2398.69	0.160683	0.0368345	0	1	1	FALSE	Not DE	T1_V_T0
ENSG00000224870.9	MRPL20-AS1	331.638	0.0657793	0.0523607	0	1	1	FALSE	Not DE	T1_V_T0
ENSG00000242485.6	MRPL20	824.012	-0.0399694	0.0510023	0	1	1	FALSE	Not DE	T1_V_T0
ENSG00000272455.1	MRPL20-DT	50.7546	0.0813007	0.084566	0	1	1	FALSE	Not DE	T1_V_T0
ENSG00000215915.10	ATAD3C	13.0521	0.00419156	0.151105	0	1	1	FALSE	Not DE	T1_V_T0
ENSG00000160072.20	ATAD3B	531.249	0.116038	0.0573355	0	1	1	FALSE	Not DE	T1_V_T0
ENSG00000197785.14	ATAD3A	271.604	-0.0141617	0.0612998	0	1	1	FALSE	Not DE	T1_V_T0
ENSG00000205090.9	TMEM240	23.9894	-0.106384	0.126686	0	1	1	FALSE	Not DE	T1_V_T0
ENSG00000160075.12	SSU72	2598.13	-0.108358	0.0428221	0	1	1	FALSE	Not DE	T1_V_T0
ENSG00000215014.5	ENSG00000215014	7.81772	-0.265225	0.171758	-0.379748	0.704133	NA	NA	Not DE	T1_V_T0
ENSG00000228594.4	FNDC10	129.678	-0.168325	0.0907203	0	1	1	FALSE	Not DE	T1_V_T0
ENSG00000286989.1	ENSG00000286989	43.4497	0.212311	0.101608	0.121159	0.903565	1	FALSE	Not DE	T1_V_T0
ENSG00000272106.1	ENSG00000272106	65.5434	0.0798048	0.0745671	0	1	1	FALSE	Not DE	T1_V_T0
ENSG00000197530.13	MIB2	858.253	0.0158357	0.0678343	0	1	1	FALSE	Not DE	T1_V_T0
ENSG00000189409.14	MMP23B	13.8727	0.307174	0.169837	0.631041	0.528014	1	FALSE	Not DE	T1_V_T0
ENSG00000248333.9	CDK11B	885.516	-0.0172166	0.0407374	0	1	1	FALSE	Not DE	T1_V_T0
ENSG00000272004.1	ENSG00000272004	9.98471	0.0215553	0.16194	0	1	1	FALSE	Not DE	T1_V_T0
ENSG00000189339.12	SLC35E2B	1061.52	0.00511654	0.0464014	0	1	1	FALSE	Not DE	T1_V_T0
ENSG00000008128.23	CDK11A	90.8573	0.0316108	0.0827733	0	1	1	FALSE	Not DE	T1_V_T0
ENSG00000290854.1	ENSG00000290854	12.3208	0.339302	0.147511	0.944353	0.344989	1	FALSE	Not DE	T1_V_T0
ENSG00000008130.15	NADK	10125.9	-0.144291	0.0643047	0	1	1	FALSE	Not DE	T1_V_T0
ENSG00000078369.19	GNB1	4955.31	-0.0762237	0.0256608	0	1	1	FALSE	Not DE	T1_V_T0
ENSG00000169885.10	CALML6	9.05626	-0.00989957	0.172663	0	1	1	FALSE	Not DE	T1_V_T0
ENSG00000067606.17	PRKCZ	541.798	0.17547	0.0489781	0	1	1	FALSE	Not DE	T1_V_T0
ENSG00000182873.5	PRKCZ-AS1	22.6415	0.0581777	0.116782	0	1	1	FALSE	Not DE	T1_V_T0
ENSG00000162585.17	FAAP20	729.567	0.0382038	0.0662001	0	1	1	FALSE	Not DE	T1_V_T0
ENSG00000157933.11	SKI	1231.39	0.227595	0.0589869	0.467822	0.639912	1	FALSE	Not DE	T1_V_T0
ENSG00000116151.14	MORN1	98.6185	0.0906823	0.0669513	0	1	1	FALSE	Not DE	T1_V_T0
ENSG00000157916.20	RER1	2592.17	-0.0307591	0.0318564	0	1	1	FALSE	Not DE	T1_V_T0
ENSG00000157911.11	PEX10	126.363	-0.0864908	0.0521027	0	1	1	FALSE	Not DE	T1_V_T0
ENSG00000149527.18	PLCH2	97.1751	0.212679	0.0994042	0.127546	0.898508	1	FALSE	Not DE	T1_V_T0
ENSG00000157881.16	PANK4	325.003	-0.0305398	0.0556578	0	1	1	FALSE	Not DE	T1_V_T0
ENSG00000238164.6	TNFRSF14-AS1	34.0182	0.204304	0.116394	0.0369799	0.970501	1	FALSE	Not DE	T1_V_T0
ENSG00000157873.18	TNFRSF14	2144.82	-0.182115	0.0634289	0	1	1	FALSE	Not DE	T1_V_T0
ENSG00000228037.1	ENSG00000228037	8.84039	-0.135052	0.17958	0	1	1	FALSE	Not DE	T1_V_T0
ENSG00000157870.17	PRXL2B	39.9718	0.0475544	0.103591	0	1	1	FALSE	Not DE	T1_V_T0
ENSG00000142606.16	MMEL1	6.4375	-0.240335	0.218129	-0.184912	0.853298	NA	NA	Not DE	T1_V_T0
ENSG00000162591.17	MEGF6	1051.96	0.524026	0.0671963	4.82209	1.42065e-06	0.000781051	TRUE	DE Up	T1_V_T0
ENSG00000238260.3	ENSG00000238260	78.5233	0.208994	0.0824791	0.10905	0.913163	1	FALSE	Not DE	T1_V_T0
ENSG00000158109.15	TPRG1L	1360.43	0.046693	0.0506792	0	1	1	FALSE	Not DE	T1_V_T0
ENSG00000116213.16	WRAP73	665.426	0.033677	0.0364674	0	1	1	FALSE	Not DE	T1_V_T0
ENSG00000078900.15	TP73	8.49935	0.294018	0.207262	0.453618	0.650104	1	FALSE	Not DE	T1_V_T0
ENSG00000227372.12	TP73-AS1	197.151	0.0268789	0.05173	0	1	1	FALSE	Not DE	T1_V_T0
ENSG00000235169.11	SMIM1	302.686	-0.378134	0.137724	-1.29341	0.19587	1	FALSE	Not DE	T1_V_T0
ENSG00000130764.10	LRRC47	749.467	-0.0347568	0.0330972	0	1	1	FALSE	Not DE	T1_V_T0
ENSG00000116198.14	CEP104	311.819	-0.0411275	0.038526	0	1	1	FALSE	Not DE	T1_V_T0
ENSG00000169598.17	DFFB	174.116	0.0536124	0.0494539	0	1	1	FALSE	Not DE	T1_V_T0
ENSG00000198912.12	C1orf174	399.391	-0.0111867	0.0361748	0	1	1	FALSE	Not DE	T1_V_T0
ENSG00000236423.8	LINC01134	18.0038	-0.291477	0.129462	-0.706594	0.479819	1	FALSE	Not DE	T1_V_T0
ENSG00000196581.11	AJAP1	17.5319	0.723664	0.190079	2.75498	0.00586952	0.280607	FALSE	Not DE	T1_V_T0
ENSG00000287586.1	ENSG00000287586	45.7613	0.652255	0.129431	3.49419	0.000475499	0.0479543	TRUE	DE Up	T1_V_T0
ENSG00000236948.2	ENSG00000236948	24.8877	0.328222	0.138239	0.927545	0.353644	1	FALSE	Not DE	T1_V_T0
ENSG00000131697.18	NPHP4	191.028	0.0266419	0.0534798	0	1	1	FALSE	Not DE	T1_V_T0
ENSG00000069424.16	KCNAB2	4220.36	0.0888027	0.035887	0	1	1	FALSE	Not DE	T1_V_T0
ENSG00000116254.18	CHD5	8.35254	0.385268	0.212001	0.8739	0.382173	1	FALSE	Not DE	T1_V_T0
ENSG00000116251.11	RPL22	37.6809	0.190821	0.101995	0	1	1	FALSE	Not DE	T1_V_T0
ENSG00000158286.13	RNF207	38.0434	0.173951	0.117417	0	1	1	FALSE	Not DE	T1_V_T0
ENSG00000116237.16	ICMT	292.358	-0.107469	0.0441726	0	1	1	FALSE	Not DE	T1_V_T0
ENSG00000158292.7	GPR153	56.8503	0.0478898	0.0949488	0	1	1	FALSE	Not DE	T1_V_T0
ENSG00000097021.21	ACOT7	115.586	-0.151625	0.0680874	0	1	1	FALSE	Not DE	T1_V_T0
ENSG00000187017.18	ESPN	307.394	0.40002	0.13974	1.43137	0.152325	1	FALSE	Not DE	T1_V_T0
ENSG00000215788.11	TNFRSF25	1056.87	0.143385	0.0737804	0	1	1	FALSE	Not DE	T1_V_T0
ENSG00000171680.23	PLEKHG5	43.2613	0.211915	0.117402	0.101489	0.919162	1	FALSE	Not DE	T1_V_T0
ENSG00000162408.11	NOL9	312.951	0.0247595	0.0475028	0	1	1	FALSE	Not DE	T1_V_T0
ENSG00000204859.13	ZBTB48	1202.34	0.0451908	0.0504824	0	1	1	FALSE	Not DE	T1_V_T0
ENSG00000162413.17	KLHL21	1533.13	0.0332277	0.0627557	0	1	1	FALSE	Not DE	T1_V_T0
ENSG00000116273.6	PHF13	184.108	0.045007	0.0567986	0	1	1	FALSE	Not DE	T1_V_T0
ENSG00000041988.16	THAP3	290.348	-0.0374899	0.0494242	0	1	1	FALSE	Not DE	T1_V_T0
ENSG00000007923.17	DNAJC11	508.075	-0.0343142	0.0404859	0	1	1	FALSE	Not DE	T1_V_T0
ENSG00000237436.1	CAMTA1-DT	8.44305	0.146591	0.182082	0	1	1	FALSE	Not DE	T1_V_T0
ENSG00000171735.20	CAMTA1	362.69	0.0689972	0.0482603	0	1	1	FALSE	Not DE	T1_V_T0
ENSG00000049245.13	VAMP3	1416.88	-0.290329	0.0519553	-1.7386	0.082106	1	FALSE	Not DE	T1_V_T0
ENSG00000049246.15	PER3	49.8337	0.16226	0.0915497	0	1	1	FALSE	Not DE	T1_V_T0
ENSG00000049247.14	UTS2	21.2742	0.20584	0.150755	0.0387366	0.9691	1	FALSE	Not DE	T1_V_T0
ENSG00000049249.10	TNFRSF9	95.2067	0.0494138	0.083416	0	1	1	FALSE	Not DE	T1_V_T0
ENSG00000116288.13	PARK7	1444.82	-0.110225	0.0490278	0	1	1	FALSE	Not DE	T1_V_T0
ENSG00000284747.1	ENSG00000284747	16.154	-0.0108741	0.141282	0	1	1	FALSE	Not DE	T1_V_T0
ENSG00000162426.16	SLC45A1	10.0171	0.182664	0.18523	0	1	1	FALSE	Not DE	T1_V_T0
ENSG00000142599.20	RERE	4338.28	-0.110048	0.0497171	0	1	1	FALSE	Not DE	T1_V_T0
ENSG00000232912.6	RERE-AS1	364.602	-0.206129	0.0777004	-0.078878	0.93713	1	FALSE	Not DE	T1_V_T0
ENSG00000074800.16	ENO1	9554.08	-0.118659	0.0547622	0	1	1	FALSE	Not DE	T1_V_T0
ENSG00000232208.2	ENSG00000232208	5.60937	-0.510451	0.235841	-1.31636	0.188055	NA	NA	Not DE	T1_V_T0
ENSG00000131686.15	CA6	10.408	-0.0510291	0.201138	0	1	1	FALSE	Not DE	T1_V_T0
ENSG00000290109.1	ENSG00000290109	13.8962	0.0944023	0.175649	0	1	1	FALSE	Not DE	T1_V_T0
ENSG00000142583.18	SLC2A5	61.733	0.401617	0.121275	1.66248	0.0964167	1	FALSE	Not DE	T1_V_T0
ENSG00000180758.12	GPR157	94.6699	0.249314	0.0707201	0.697308	0.48561	1	FALSE	Not DE	T1_V_T0
ENSG00000228526.8	MIR34AHG	8.18238	-0.0282006	0.214441	0	1	NA	NA	Not DE	T1_V_T0
ENSG00000049239.13	H6PD	1037.18	-0.0182713	0.0439212	0	1	1	FALSE	Not DE	T1_V_T0
ENSG00000171621.14	SPSB1	68.6542	-0.0291106	0.0812245	0	1	1	FALSE	Not DE	T1_V_T0
ENSG00000171612.7	SLC25A33	67.0381	-0.0594038	0.06583	0	1	1	FALSE	Not DE	T1_V_T0
ENSG00000188807.13	TMEM201	90.2655	-0.0129099	0.0738491	0	1	1	FALSE	Not DE	T1_V_T0
ENSG00000171608.18	PIK3CD	9499.38	-0.0185087	0.0429383	0	1	1	FALSE	Not DE	T1_V_T0
ENSG00000179840.5	PIK3CD-AS1	43.3238	-0.281393	0.0994601	-0.818349	0.413158	1	FALSE	Not DE	T1_V_T0
ENSG00000171603.18	CLSTN1	1310.12	-0.0699443	0.038991	0	1	1	FALSE	Not DE	T1_V_T0
ENSG00000178585.15	CTNNBIP1	335.844	0.113523	0.0398784	0	1	1	FALSE	Not DE	T1_V_T0
ENSG00000162441.12	LZIC	346.881	-0.0539841	0.0371329	0	1	1	FALSE	Not DE	T1_V_T0
ENSG00000173614.14	NMNAT1	108.165	-0.0858156	0.0586118	0	1	1	FALSE	Not DE	T1_V_T0
ENSG00000162444.12	RBP7	630.333	0.158267	0.0755901	0	1	1	FALSE	Not DE	T1_V_T0
ENSG00000130939.20	UBE4B	965.491	0.128363	0.0391547	0	1	1	FALSE	Not DE	T1_V_T0
ENSG00000054523.20	KIF1B	602.495	-0.12137	0.0753687	0	1	1	FALSE	Not DE	T1_V_T0
ENSG00000284642.1	ENSG00000284642	17.5757	-0.190395	0.143229	0	1	1	FALSE	Not DE	T1_V_T0
ENSG00000142657.21	PGD	6397.8	-0.132444	0.0617435	0	1	1	FALSE	Not DE	T1_V_T0
ENSG00000160049.12	DFFA	207.775	-0.121637	0.0457439	0	1	1	FALSE	Not DE	T1_V_T0
ENSG00000142655.13	PEX14	327.495	0.0786584	0.0449317	0	1	1	FALSE	Not DE	T1_V_T0
ENSG00000130940.15	CASZ1	223.663	-0.148924	0.055833	0	1	1	FALSE	Not DE	T1_V_T0
ENSG00000175262.15	C1orf127	20.3939	0.0691058	0.127818	0	1	1	FALSE	Not DE	T1_V_T0
ENSG00000120948.19	TARDBP	1578.87	0.046641	0.0277418	0	1	1	FALSE	Not DE	T1_V_T0
ENSG00000116649.10	SRM	471.167	-0.152022	0.0615961	0	1	1	FALSE	Not DE	T1_V_T0
ENSG00000171824.14	EXOSC10	634.864	-0.0258771	0.0478054	0	1	1	FALSE	Not DE	T1_V_T0
ENSG00000226849.1	ENSG00000226849	9.78348	0.0745191	0.1908	0	1	1	FALSE	Not DE	T1_V_T0
ENSG00000198793.14	MTOR	587.011	0.0424601	0.0350044	0	1	1	FALSE	Not DE	T1_V_T0
ENSG00000120942.14	UBIAD1	183.425	-0.0778212	0.0528406	0	1	1	FALSE	Not DE	T1_V_T0
ENSG00000204624.8	DISP3	7.74471	-0.221726	0.210248	-0.103336	0.917696	NA	NA	Not DE	T1_V_T0
ENSG00000116661.11	FBXO2	50.6338	0.0662653	0.0954033	0	1	1	FALSE	Not DE	T1_V_T0
ENSG00000132879.14	FBXO44	571.446	0.128395	0.055807	0	1	1	FALSE	Not DE	T1_V_T0
ENSG00000116670.16	MAD2L2	441.253	-0.0758875	0.0638756	0	1	1	FALSE	Not DE	T1_V_T0
ENSG00000116663.11	FBXO6	528.778	-0.559163	0.103855	-3.45832	0.000543555	0.0529588	FALSE	Not DE	T1_V_T0
ENSG00000162490.7	DRAXIN	36.1921	0.206095	0.0984835	0.0618866	0.950653	1	FALSE	Not DE	T1_V_T0
ENSG00000177674.16	AGTRAP	4147.34	-0.250611	0.0793402	-0.637894	0.523543	1	FALSE	Not DE	T1_V_T0
ENSG00000177000.13	MTHFR	655.746	-0.133748	0.0408485	0	1	1	FALSE	Not DE	T1_V_T0
ENSG00000011021.23	CLCN6	393.172	-0.0583759	0.0419364	0	1	1	FALSE	Not DE	T1_V_T0
ENSG00000116685.16	KIAA2013	2014.5	-0.100614	0.049759	0	1	1	FALSE	Not DE	T1_V_T0
ENSG00000083444.17	PLOD1	1321.58	-0.0581732	0.0541955	0	1	1	FALSE	Not DE	T1_V_T0
ENSG00000116688.18	MFN2	1556.93	-0.00264898	0.0464502	0	1	1	FALSE	Not DE	T1_V_T0
ENSG00000116691.11	MIIP	1413.7	-0.131681	0.0728465	0	1	1	FALSE	Not DE	T1_V_T0
ENSG00000120949.15	TNFRSF8	393.585	-0.0177479	0.0560245	0	1	1	FALSE	Not DE	T1_V_T0
ENSG00000028137.19	TNFRSF1B	15243.4	-0.17292	0.0491272	0	1	1	FALSE	Not DE	T1_V_T0
ENSG00000048707.15	VPS13D	827.03	0.099232	0.0451407	0	1	1	FALSE	Not DE	T1_V_T0
ENSG00000162496.9	DHRS3	342.386	-0.0180575	0.0662365	0	1	1	FALSE	Not DE	T1_V_T0
ENSG00000116731.23	PRDM2	996.284	0.0541269	0.0404615	0	1	1	FALSE	Not DE	T1_V_T0
ENSG00000189337.17	KAZN	172.419	0.396392	0.117694	1.66866	0.0951849	1	FALSE	Not DE	T1_V_T0
ENSG00000171729.14	TMEM51	43.3718	-0.448692	0.129852	-1.91519	0.0554679	1	FALSE	Not DE	T1_V_T0
ENSG00000142621.21	FHAD1	12.4275	-0.0576017	0.176792	0	1	1	FALSE	Not DE	T1_V_T0
ENSG00000228140.2	EFHD2-AS1	38.397	-0.0307386	0.0956705	0	1	1	FALSE	Not DE	T1_V_T0
ENSG00000142634.13	EFHD2	14110.5	-0.135784	0.0553132	0	1	1	FALSE	Not DE	T1_V_T0
ENSG00000162438.12	CTRC	19.9578	0.215373	0.138734	0.110811	0.911766	1	FALSE	Not DE	T1_V_T0
ENSG00000132906.18	CASP9	338.563	-0.125927	0.0388195	0	1	1	FALSE	Not DE	T1_V_T0
ENSG00000116138.13	DNAJC16	191.743	-0.0521062	0.0398534	0	1	1	FALSE	Not DE	T1_V_T0
ENSG00000116771.6	AGMAT	47.8386	-0.101582	0.0887009	0	1	1	FALSE	Not DE	T1_V_T0
ENSG00000197312.12	DDI2	301.775	0.0112248	0.042594	0	1	1	FALSE	Not DE	T1_V_T0
ENSG00000116786.13	PLEKHM2	1982.64	-0.100395	0.0497705	0	1	1	FALSE	Not DE	T1_V_T0
ENSG00000162461.8	SLC25A34	53.0683	-0.339367	0.0913194	-1.52614	0.126974	1	FALSE	Not DE	T1_V_T0
ENSG00000233954.7	UQCRHL	65.9467	-0.11177	0.0717805	0	1	1	FALSE	Not DE	T1_V_T0
ENSG00000179743.4	SPEN-AS1	92.8793	0.0355715	0.0575423	0	1	1	FALSE	Not DE	T1_V_T0
ENSG00000065526.13	SPEN	1445.94	-0.0351239	0.0490516	0	1	1	FALSE	Not DE	T1_V_T0
ENSG00000116809.12	ZBTB17	835.637	-0.0984177	0.0492763	0	1	1	FALSE	Not DE	T1_V_T0
ENSG00000142627.13	EPHA2	11.8702	0.339713	0.178116	0.784396	0.432808	1	FALSE	Not DE	T1_V_T0
ENSG00000142632.17	ARHGEF19	162.721	0.0801317	0.0596029	0	1	1	FALSE	Not DE	T1_V_T0
ENSG00000291077.1	ENSG00000291077	21.6684	0.352128	0.166303	0.914766	0.360315	1	FALSE	Not DE	T1_V_T0
ENSG00000288398.1	ENSG00000288398	38.7604	-0.214072	0.0885401	-0.158929	0.873725	1	FALSE	Not DE	T1_V_T0
ENSG00000132881.12	CPLANE2	26.7649	-0.155255	0.115151	0	1	1	FALSE	Not DE	T1_V_T0
ENSG00000037637.11	FBXO42	656.718	0.00820553	0.0311502	0	1	1	FALSE	Not DE	T1_V_T0
ENSG00000055070.17	SZRD1	2219.33	-0.164577	0.0403957	0	1	1	FALSE	Not DE	T1_V_T0
ENSG00000157191.20	NECAP2	1634.92	-0.124191	0.0346766	0	1	1	FALSE	Not DE	T1_V_T0
ENSG00000226029.1	LINC01772	31.7041	0.147562	0.0984744	0	1	1	FALSE	Not DE	T1_V_T0
ENSG00000290842.1	CROCCP3	124.518	0.123806	0.0738816	0	1	1	FALSE	Not DE	T1_V_T0
ENSG00000219481.11	NBPF1	64.4466	-0.00565875	0.0803957	0	1	1	FALSE	Not DE	T1_V_T0
ENSG00000291072.1	CROCCP2	280.488	0.121528	0.0537781	0	1	1	FALSE	Not DE	T1_V_T0
ENSG00000186301.8	MST1P2	37.6977	0.259706	0.098386	0.606851	0.54395	1	FALSE	Not DE	T1_V_T0
ENSG00000280114.1	ENSG00000280114	15.3281	-0.0302839	0.122393	0	1	1	FALSE	Not DE	T1_V_T0
ENSG00000058453.17	CROCC	662.175	0.116318	0.0581274	0	1	1	FALSE	Not DE	T1_V_T0
ENSG00000238142.4	ENSG00000238142	118.828	0.0293261	0.0676689	0	1	1	FALSE	Not DE	T1_V_T0
ENSG00000159363.19	ATP13A2	757.99	-0.171205	0.0570688	0	1	1	FALSE	Not DE	T1_V_T0
ENSG00000117118.10	SDHB	920.391	-0.115127	0.0375945	0	1	1	FALSE	Not DE	T1_V_T0
ENSG00000117115.13	PADI2	4014.76	-0.323422	0.0866236	-1.4248	0.154214	1	FALSE	Not DE	T1_V_T0
ENSG00000159339.13	PADI4	3701.79	0.133138	0.0864649	0	1	1	FALSE	Not DE	T1_V_T0
ENSG00000276747.1	PADI6	16.1293	-0.575403	0.175471	-2.1394	0.0324031	0.845447	FALSE	Not DE	T1_V_T0
ENSG00000179051.14	RCC2	1373.14	-0.105556	0.0350425	0	1	1	FALSE	Not DE	T1_V_T0
ENSG00000074964.17	ARHGEF10L	551.034	-0.166946	0.0618258	0	1	1	FALSE	Not DE	T1_V_T0
ENSG00000159423.17	ALDH4A1	117.532	0.182116	0.0671495	0	1	1	FALSE	Not DE	T1_V_T0
ENSG00000169991.11	IFFO2	362.574	0.0362837	0.0534223	0	1	1	FALSE	Not DE	T1_V_T0
ENSG00000272084.1	ENSG00000272084	7.87572	0.0627323	0.21165	0	1	NA	NA	Not DE	T1_V_T0
ENSG00000127481.15	UBR4	1971.78	-0.00102355	0.0383432	0	1	1	FALSE	Not DE	T1_V_T0
ENSG00000230424.3	EMC1-AS1	63.9778	0.0940406	0.0707165	0	1	1	FALSE	Not DE	T1_V_T0
ENSG00000127463.16	EMC1	280.332	0.00197703	0.0389296	0	1	1	FALSE	Not DE	T1_V_T0
ENSG00000053372.5	MRTO4	192.325	-0.0538457	0.057975	0	1	1	FALSE	Not DE	T1_V_T0
ENSG00000162482.5	AKR7A3	7.2579	0.43715	0.210315	1.12759	0.259492	NA	NA	Not DE	T1_V_T0
ENSG00000053371.13	AKR7A2	363.918	-0.0881827	0.0544952	0	1	1	FALSE	Not DE	T1_V_T0
ENSG00000040487.13	SLC66A1	206.692	-0.0350839	0.0533436	0	1	1	FALSE	Not DE	T1_V_T0
ENSG00000077549.19	CAPZB	6795.04	-0.0707245	0.0347638	0	1	1	FALSE	Not DE	T1_V_T0
ENSG00000173436.15	MICOS10	17.6311	0.279424	0.144881	0.548201	0.583554	1	FALSE	Not DE	T1_V_T0
ENSG00000158747.15	NBL1	38.234	0.167315	0.117686	0	1	1	FALSE	Not DE	T1_V_T0
ENSG00000158748.4	HTR6	19.1843	0.0559077	0.146937	0	1	1	FALSE	Not DE	T1_V_T0
ENSG00000162542.14	TMCO4	331.139	-0.0244961	0.0506127	0	1	1	FALSE	Not DE	T1_V_T0
ENSG00000169914.6	OTUD3	114.21	0.0705799	0.0618024	0	1	1	FALSE	Not DE	T1_V_T0
ENSG00000187980.7	PLA2G2C	14.3276	0.312095	0.13778	0.813578	0.415887	1	FALSE	Not DE	T1_V_T0
ENSG00000162543.6	UBXN10	22.2215	0.289041	0.126533	0.703697	0.481621	1	FALSE	Not DE	T1_V_T0
ENSG00000226664.1	ENSG00000226664	7.41827	0.431519	0.205082	1.12891	0.258937	NA	NA	Not DE	T1_V_T0
ENSG00000162545.6	CAMK2N1	26.545	0.158124	0.121696	0	1	1	FALSE	Not DE	T1_V_T0
ENSG00000090432.7	MUL1	507.62	-0.195456	0.0513823	0	1	1	FALSE	Not DE	T1_V_T0
ENSG00000158825.6	CDA	2578.92	-0.0472301	0.0771758	0	1	1	FALSE	Not DE	T1_V_T0
ENSG00000158828.8	PINK1	2330.7	0.158965	0.06571	0	1	1	FALSE	Not DE	T1_V_T0
ENSG00000117242.7	PINK1-AS	98.4575	0.0328555	0.0626476	0	1	1	FALSE	Not DE	T1_V_T0
ENSG00000244038.11	DDOST	1195.28	-0.125098	0.0430063	0	1	1	FALSE	Not DE	T1_V_T0
ENSG00000127483.19	HP1BP3	1579.89	0.0699927	0.0373189	0	1	1	FALSE	Not DE	T1_V_T0
ENSG00000075151.24	EIF4G3	1016.52	-0.00306715	0.0760771	0	1	1	FALSE	Not DE	T1_V_T0
ENSG00000117298.16	ECE1	4722	-0.173207	0.0694914	0	1	1	FALSE	Not DE	T1_V_T0
ENSG00000236936.1	ENSG00000236936	14.5762	0.400447	0.138838	1.44375	0.14881	1	FALSE	Not DE	T1_V_T0
ENSG00000231105.2	ECE1-AS1	28.4922	-0.0875973	0.0996824	0	1	1	FALSE	Not DE	T1_V_T0
ENSG00000142794.19	NBPF3	53.0429	0.156064	0.101865	0	1	1	FALSE	Not DE	T1_V_T0
ENSG00000162551.14	ALPL	9075.98	-0.466155	0.156129	-1.70471	0.0882489	1	FALSE	Not DE	T1_V_T0
ENSG00000233431.1	LINC02596	41.7272	-0.296678	0.150472	-0.6425	0.520549	1	FALSE	Not DE	T1_V_T0
ENSG00000076864.21	RAP1GAP	184.79	0.174484	0.204538	0	1	1	FALSE	Not DE	T1_V_T0
ENSG00000090686.16	USP48	799.28	0.162689	0.033168	0	1	1	FALSE	Not DE	T1_V_T0
ENSG00000187942.12	LDLRAD2	8.68212	0.0726777	0.184813	0	1	1	FALSE	Not DE	T1_V_T0
ENSG00000142798.20	HSPG2	35.3644	0.270853	0.11309	0.626516	0.530976	1	FALSE	Not DE	T1_V_T0
ENSG00000285752.1	CDC42-AS1	11.1642	0.0995489	0.155001	0	1	1	FALSE	Not DE	T1_V_T0
ENSG00000070831.18	CDC42	45.8661	0.282277	0.119003	0.691384	0.489325	1	FALSE	Not DE	T1_V_T0
ENSG00000184677.18	ZBTB40	594.438	0.142311	0.0515959	0	1	1	FALSE	Not DE	T1_V_T0
ENSG00000159189.13	C1QC	96.2595	-1.81599	0.237089	-6.81595	9.36454e-12	7.20788e-08	TRUE	DE Down	T1_V_T0
ENSG00000173369.18	C1QB	306.498	-1.54091	0.194087	-6.90879	4.88789e-12	7.20788e-08	TRUE	DE Down	T1_V_T0
ENSG00000133216.17	EPHB2	84.931	0.0634778	0.118166	0	1	1	FALSE	Not DE	T1_V_T0
ENSG00000004487.18	KDM1A	544.059	0.0545777	0.0331283	0	1	1	FALSE	Not DE	T1_V_T0
ENSG00000240553.1	ENSG00000240553	39.8936	0.112939	0.0912136	0	1	1	FALSE	Not DE	T1_V_T0
ENSG00000169641.15	LUZP1	46.6741	0.289237	0.12184	0.732408	0.46392	1	FALSE	Not DE	T1_V_T0
ENSG00000261326.4	LINC01355	63.0984	0.0855551	0.0771601	0	1	1	FALSE	Not DE	T1_V_T0
ENSG00000125944.21	HNRNPR	810.536	-0.0722347	0.0458583	0	1	1	FALSE	Not DE	T1_V_T0
ENSG00000125945.15	ZNF436	77.8694	-0.146895	0.0719145	0	1	1	FALSE	Not DE	T1_V_T0
ENSG00000249087.9	ZNF436-AS1	23.0814	-0.115253	0.113995	0	1	1	FALSE	Not DE	T1_V_T0
ENSG00000204219.11	TCEA3	99.9652	-0.0743535	0.0805131	0	1	1	FALSE	Not DE	T1_V_T0
ENSG00000088280.20	ASAP3	19.5305	0.223246	0.127842	0.181831	0.855715	1	FALSE	Not DE	T1_V_T0
ENSG00000007968.7	E2F2	336.503	0.370447	0.101043	1.68689	0.0916253	1	FALSE	Not DE	T1_V_T0
ENSG00000117318.9	ID3	152.046	-0.0669303	0.0857701	0	1	1	FALSE	Not DE	T1_V_T0
ENSG00000197880.10	MDS2	80.3956	0.175578	0.0895687	0	1	1	FALSE	Not DE	T1_V_T0
ENSG00000142676.14	RPL11	16489.4	-0.153806	0.0633722	0	1	1	FALSE	Not DE	T1_V_T0
ENSG00000236810.8	ELOA-AS1	106.534	0.124968	0.0607188	0	1	1	FALSE	Not DE	T1_V_T0
ENSG00000011007.13	ELOA	417.387	-0.112544	0.0355247	0	1	1	FALSE	Not DE	T1_V_T0
ENSG00000057757.10	PITHD1	781.212	0.150594	0.0601624	0	1	1	FALSE	Not DE	T1_V_T0
ENSG00000011009.11	LYPLA2	1641.77	-0.100657	0.0571729	0	1	1	FALSE	Not DE	T1_V_T0
ENSG00000117308.15	GALE	127.003	-0.0727231	0.0606119	0	1	1	FALSE	Not DE	T1_V_T0
ENSG00000117305.15	HMGCL	520.731	-0.120865	0.0480586	0	1	1	FALSE	Not DE	T1_V_T0
ENSG00000179163.12	FUCA1	399.644	0.0116757	0.0501445	0	1	1	FALSE	Not DE	T1_V_T0
ENSG00000188822.8	CNR2	290.397	0.254692	0.0848744	0.644391	0.519322	1	FALSE	Not DE	T1_V_T0
ENSG00000189266.13	PNRC2	1044.72	-0.062321	0.036228	0	1	1	FALSE	Not DE	T1_V_T0
ENSG00000188529.15	SRSF10	649.877	0.0430054	0.0467536	0	1	1	FALSE	Not DE	T1_V_T0
ENSG00000185436.12	IFNLR1	65.9131	-0.0887554	0.0843828	0	1	1	FALSE	Not DE	T1_V_T0
ENSG00000001460.18	STPG1	33.6485	-0.122392	0.0955516	0	1	1	FALSE	Not DE	T1_V_T0
ENSG00000001461.17	NIPAL3	313.848	0.0145322	0.0476365	0	1	1	FALSE	Not DE	T1_V_T0
ENSG00000288982.1	ENSG00000288982	10.5702	0.0846255	0.16664	0	1	1	FALSE	Not DE	T1_V_T0
ENSG00000286061.1	RCAN3AS	41.7059	0.26262	0.101704	0.615705	0.538089	1	FALSE	Not DE	T1_V_T0
ENSG00000117602.13	RCAN3	667.422	0.0413669	0.0641964	0	1	1	FALSE	Not DE	T1_V_T0
ENSG00000133226.19	SRRM1	859.125	-0.0204373	0.036859	0	1	1	FALSE	Not DE	T1_V_T0
ENSG00000169504.15	CLIC4	233.822	-0.17182	0.0606469	0	1	1	FALSE	Not DE	T1_V_T0
ENSG00000020633.19	RUNX3	2169.86	-0.0184313	0.058741	0	1	1	FALSE	Not DE	T1_V_T0
ENSG00000233755.1	ENSG00000233755	18.7072	0.380015	0.142993	1.25891	0.208063	1	FALSE	Not DE	T1_V_T0
ENSG00000117614.10	SYF2	1298.63	-0.103524	0.0378493	0	1	1	FALSE	Not DE	T1_V_T0
ENSG00000284602.1	ENSG00000284602	14.1273	0.0761684	0.147322	0	1	1	FALSE	Not DE	T1_V_T0
ENSG00000117616.18	RSRP1	5047.01	0.137527	0.0404476	0	1	1	FALSE	Not DE	T1_V_T0
ENSG00000187010.21	RHD	30.4029	0.188899	0.137677	0	1	1	FALSE	Not DE	T1_V_T0
ENSG00000183726.11	TMEM50A	2217	-0.0434238	0.0351034	0	1	1	FALSE	Not DE	T1_V_T0
ENSG00000188672.19	RHCE	18.3722	0.259036	0.197327	0.29918	0.764803	1	FALSE	Not DE	T1_V_T0
ENSG00000204178.11	MACO1	362.9	0.157452	0.0498864	0	1	1	FALSE	Not DE	T1_V_T0
ENSG00000157978.12	LDLRAP1	1845.34	-0.086126	0.0509868	0	1	1	FALSE	Not DE	T1_V_T0
ENSG00000225643.1	ENSG00000225643	10.5068	0.365561	0.189808	0.872256	0.383069	1	FALSE	Not DE	T1_V_T0
ENSG00000117643.15	MAN1C1	353.927	0.0602832	0.0637474	0	1	1	FALSE	Not DE	T1_V_T0
ENSG00000162430.18	SELENON	53.7915	-0.117711	0.123927	0	1	1	FALSE	Not DE	T1_V_T0
ENSG00000228172.5	ENSG00000228172	11.3235	0.11135	0.155043	0	1	1	FALSE	Not DE	T1_V_T0
ENSG00000117640.18	MTFR1L	626.213	0.120872	0.0403692	0	1	1	FALSE	Not DE	T1_V_T0
ENSG00000236528.3	ENSG00000236528	12.4188	0.129703	0.147146	0	1	1	FALSE	Not DE	T1_V_T0
ENSG00000182749.6	PAQR7	196.231	0.231839	0.0657331	0.484373	0.628121	1	FALSE	Not DE	T1_V_T0
ENSG00000117632.23	STMN1	284.682	0.112957	0.0708333	0	1	1	FALSE	Not DE	T1_V_T0
ENSG00000158006.14	PAFAH2	308.684	0.0987416	0.049338	0	1	1	FALSE	Not DE	T1_V_T0
ENSG00000175087.10	PDIK1L	86.7742	0.0740114	0.0678466	0	1	1	FALSE	Not DE	T1_V_T0
ENSG00000142684.9	ZNF593	130.618	-0.219128	0.0965115	-0.198192	0.842895	1	FALSE	Not DE	T1_V_T0
ENSG00000142675.18	CNKSR1	45.9476	-0.00765111	0.100911	0	1	1	FALSE	Not DE	T1_V_T0
ENSG00000130695.16	CEP85	202.04	0.0955705	0.0561473	0	1	1	FALSE	Not DE	T1_V_T0
ENSG00000142669.15	SH3BGRL3	19423.7	-0.0799864	0.0737068	0	1	1	FALSE	Not DE	T1_V_T0
ENSG00000158062.21	UBXN11	3376.28	0.146057	0.0568864	0	1	1	FALSE	Not DE	T1_V_T0
ENSG00000169442.9	CD52	7792.24	-0.0818377	0.0743937	0	1	1	FALSE	Not DE	T1_V_T0
ENSG00000176092.17	CRYBG2	37.7035	0.101444	0.097363	0	1	1	FALSE	Not DE	T1_V_T0
ENSG00000176083.18	ZNF683	302.392	-0.00882919	0.0987959	0	1	1	FALSE	Not DE	T1_V_T0
ENSG00000117682.18	DHDDS	284.13	-0.0461813	0.0394508	0	1	1	FALSE	Not DE	T1_V_T0
ENSG00000225891.2	DHDDS-AS1	29.2483	-0.12152	0.102687	0	1	1	FALSE	Not DE	T1_V_T0
ENSG00000198830.11	HMGN2	2942.98	-0.0168877	0.0535363	0	1	1	FALSE	Not DE	T1_V_T0
ENSG00000117676.14	RPS6KA1	7225.02	-0.0648533	0.0529276	0	1	1	FALSE	Not DE	T1_V_T0
ENSG00000117713.21	ARID1A	2174.2	0.0255655	0.0378566	0	1	1	FALSE	Not DE	T1_V_T0
ENSG00000060642.12	PIGV	234.947	-0.108971	0.0410922	0	1	1	FALSE	Not DE	T1_V_T0
ENSG00000204160.12	ZDHHC18	9504.45	-0.0921631	0.0660497	0	1	1	FALSE	Not DE	T1_V_T0
ENSG00000175793.12	SFN	9.06362	-0.0886755	0.198119	0	1	1	FALSE	Not DE	T1_V_T0
ENSG00000142751.15	GPN2	363.896	-0.0123504	0.0390107	0	1	1	FALSE	Not DE	T1_V_T0
ENSG00000198746.13	GPATCH3	291.378	-0.113937	0.0546788	0	1	1	FALSE	Not DE	T1_V_T0
ENSG00000090273.14	NUDC	992.014	-0.138581	0.056417	0	1	1	FALSE	Not DE	T1_V_T0
ENSG00000175707.10	KDF1	13.6512	-0.332069	0.154519	-0.85471	0.392712	1	FALSE	Not DE	T1_V_T0
ENSG00000253368.4	TRNP1	14.1198	0.00619317	0.174187	0	1	1	FALSE	Not DE	T1_V_T0
ENSG00000090020.11	SLC9A1	1047.08	-0.0725274	0.0521764	0	1	1	FALSE	Not DE	T1_V_T0
ENSG00000142784.16	WDTC1	2543.48	-0.0221435	0.0443359	0	1	1	FALSE	Not DE	T1_V_T0
ENSG00000186501.15	TMEM222	1046.35	-0.0474536	0.0530937	0	1	1	FALSE	Not DE	T1_V_T0
ENSG00000142765.18	SYTL1	3917.18	0.160704	0.0546864	0	1	1	FALSE	Not DE	T1_V_T0
ENSG00000142733.18	MAP3K6	231.862	-0.0874962	0.0648285	0	1	1	FALSE	Not DE	T1_V_T0
ENSG00000158195.11	WASF2	3673.29	0.0766202	0.0399589	0	1	1	FALSE	Not DE	T1_V_T0
ENSG00000237429.1	ENSG00000237429	36.8096	-0.11936	0.107199	0	1	1	FALSE	Not DE	T1_V_T0
ENSG00000126705.15	AHDC1	198.539	0.00395272	0.0612321	0	1	1	FALSE	Not DE	T1_V_T0
ENSG00000000938.13	FGR	14535.9	-0.18529	0.0476102	0	1	1	FALSE	Not DE	T1_V_T0
ENSG00000233975.2	LINC02574	7.88636	-1.13465	0.304505	-3.06939	0.00214496	NA	NA	Not DE	T1_V_T0
ENSG00000126709.16	IFI6	4335.3	-0.73079	0.16573	-3.20274	0.00136125	0.100733	FALSE	Not DE	T1_V_T0
ENSG00000009780.16	FAM76A	157.116	0.0793189	0.0511237	0	1	1	FALSE	Not DE	T1_V_T0
ENSG00000117758.14	STX12	504.77	-0.0511157	0.0397694	0	1	1	FALSE	Not DE	T1_V_T0
ENSG00000117751.18	PPP1R8	402.534	-0.0303751	0.0370893	0	1	1	FALSE	Not DE	T1_V_T0
ENSG00000130775.16	THEMIS2	7783.55	-0.130499	0.048142	0	1	1	FALSE	Not DE	T1_V_T0
ENSG00000117748.10	RPA2	822.075	-0.0297704	0.0383223	0	1	1	FALSE	Not DE	T1_V_T0
ENSG00000130768.15	SMPDL3B	34.1866	-0.155926	0.110893	0	1	1	FALSE	Not DE	T1_V_T0
ENSG00000227050.1	ENSG00000227050	6.61303	0.617629	0.214089	1.95073	0.0510896	NA	NA	Not DE	T1_V_T0
ENSG00000158156.9	XKR8	1493.69	-0.0669714	0.0482037	0	1	1	FALSE	Not DE	T1_V_T0
ENSG00000158161.16	EYA3	455.004	0.0150273	0.0382365	0	1	1	FALSE	Not DE	T1_V_T0
ENSG00000228589.3	SPCS2P4	14.9321	-0.19387	0.131132	0	1	1	FALSE	Not DE	T1_V_T0
ENSG00000289576.2	ENSG00000289576	65.7017	0.0758502	0.0902533	0	1	1	FALSE	Not DE	T1_V_T0
ENSG00000169403.12	PTAFR	6502.66	0.0632228	0.0494464	0	1	1	FALSE	Not DE	T1_V_T0
ENSG00000126698.11	DNAJC8	1126.96	-0.0514036	0.0425814	0	1	1	FALSE	Not DE	T1_V_T0
ENSG00000130770.18	ATP5IF1	770.515	0.0199081	0.0416011	0	1	1	FALSE	Not DE	T1_V_T0
ENSG00000270605.1	ENSG00000270605	86.9519	0.142052	0.0722253	0	1	1	FALSE	Not DE	T1_V_T0
ENSG00000130766.5	SESN2	337.702	0.00247819	0.0486816	0	1	1	FALSE	Not DE	T1_V_T0
ENSG00000130772.14	MED18	248.186	-0.123102	0.0506023	0	1	1	FALSE	Not DE	T1_V_T0
ENSG00000204138.13	PHACTR4	285.453	0.0607455	0.0534664	0	1	1	FALSE	Not DE	T1_V_T0
ENSG00000180198.17	RCC1	217.142	-0.165103	0.0456254	0	1	1	FALSE	Not DE	T1_V_T0
ENSG00000180098.9	TRNAU1AP	349.285	-0.0229945	0.0435715	0	1	1	FALSE	Not DE	T1_V_T0
ENSG00000197989.15	SNHG12	316.62	0.143634	0.054755	0	1	1	FALSE	Not DE	T1_V_T0
ENSG00000120656.14	TAF12	458.302	-0.120566	0.0425342	0	1	1	FALSE	Not DE	T1_V_T0
ENSG00000162419.13	GMEB1	297.486	-0.0443197	0.0395754	0	1	1	FALSE	Not DE	T1_V_T0
ENSG00000198492.16	YTHDF2	708.531	-0.0412498	0.0348259	0	1	1	FALSE	Not DE	T1_V_T0
ENSG00000159023.23	EPB41	3804.64	0.350371	0.0744987	2.01844	0.0435451	1	FALSE	Not DE	T1_V_T0
ENSG00000116350.18	SRSF4	1283.25	-0.0492877	0.0266927	0	1	1	FALSE	Not DE	T1_V_T0
ENSG00000116353.16	MECR	94.5943	0.0673588	0.0682437	0	1	1	FALSE	Not DE	T1_V_T0
ENSG00000060656.20	PTPRU	7.4827	-0.274416	0.227387	-0.327265	0.743468	NA	NA	Not DE	T1_V_T0
ENSG00000186056.11	MATN1-AS1	54.7996	-0.0389017	0.092978	0	1	1	FALSE	Not DE	T1_V_T0
ENSG00000287510.1	ENSG00000287510	60.5234	-0.300261	0.293896	-0.341144	0.732995	1	FALSE	Not DE	T1_V_T0
ENSG00000162511.8	LAPTM5	28922.9	-0.124509	0.0460957	0	1	1	FALSE	Not DE	T1_V_T0
ENSG00000162512.16	SDC3	137.97	-0.981482	0.142665	-5.47776	4.30738e-08	4.73627e-05	TRUE	DE Down	T1_V_T0
ENSG00000134644.16	PUM1	790.844	0.0708116	0.0434465	0	1	1	FALSE	Not DE	T1_V_T0
ENSG00000060688.13	SNRNP40	412.516	-0.0187785	0.036746	0	1	1	FALSE	Not DE	T1_V_T0
ENSG00000121766.16	ZCCHC17	399.859	0.0196573	0.0425912	0	1	1	FALSE	Not DE	T1_V_T0
ENSG00000168528.12	SERINC2	105.782	-0.0619097	0.0986874	0	1	1	FALSE	Not DE	T1_V_T0
ENSG00000284543.1	LINC01226	10.8729	0.546474	0.214857	1.61258	0.106836	1	FALSE	Not DE	T1_V_T0
ENSG00000162517.13	PEF1	1192.5	-0.0739057	0.0498158	0	1	1	FALSE	Not DE	T1_V_T0
ENSG00000121753.13	ADGRB2	31.3433	-0.0172834	0.120279	0	1	1	FALSE	Not DE	T1_V_T0
ENSG00000134668.13	SPOCD1	198.456	-0.335706	0.0971887	-1.39631	0.16262	1	FALSE	Not DE	T1_V_T0
ENSG00000269967.1	ENSG00000269967	8.63214	0.239891	0.180775	0.220669	0.82535	1	FALSE	Not DE	T1_V_T0
ENSG00000184007.22	PTP4A2	116.869	0.128527	0.0859312	0	1	1	FALSE	Not DE	T1_V_T0
ENSG00000121774.18	KHDRBS1	1350.06	-0.0737274	0.0311507	0	1	1	FALSE	Not DE	T1_V_T0
ENSG00000121775.18	TMEM39B	348.492	-0.0581095	0.0423105	0	1	1	FALSE	Not DE	T1_V_T0
ENSG00000025800.14	KPNA6	131.201	0.210598	0.0802335	0.132096	0.894909	1	FALSE	Not DE	T1_V_T0
ENSG00000084652.16	TXLNA	936.905	-0.0730023	0.0327524	0	1	1	FALSE	Not DE	T1_V_T0
ENSG00000160050.16	CCDC28B	114.564	-0.0726725	0.0759503	0	1	1	FALSE	Not DE	T1_V_T0
ENSG00000224066.1	ENSG00000224066	23.3642	0.090761	0.122184	0	1	1	FALSE	Not DE	T1_V_T0
ENSG00000160051.12	IQCC	18.0236	-0.00113374	0.121301	0	1	1	FALSE	Not DE	T1_V_T0
ENSG00000160055.20	TMEM234	346.253	-0.0907644	0.0526307	0	1	1	FALSE	Not DE	T1_V_T0
ENSG00000084623.12	EIF3I	1168.13	-0.10478	0.0402786	0	1	1	FALSE	Not DE	T1_V_T0
ENSG00000183615.6	FAM167B	8.64501	0.0179647	0.200813	0	1	1	FALSE	Not DE	T1_V_T0
ENSG00000182866.18	LCK	2972.29	-0.0155302	0.0583141	0	1	1	FALSE	Not DE	T1_V_T0
ENSG00000116478.12	HDAC1	1635.95	-0.0544227	0.0257881	0	1	1	FALSE	Not DE	T1_V_T0
ENSG00000175130.7	MARCKSL1	1172.47	0.173462	0.0611294	0	1	1	FALSE	Not DE	T1_V_T0
ENSG00000162526.7	TSSK3	23.5093	0.0328163	0.119507	0	1	1	FALSE	Not DE	T1_V_T0
ENSG00000225828.2	FAM229A	380.807	0.231293	0.0588992	0.531306	0.595207	1	FALSE	Not DE	T1_V_T0
ENSG00000160058.19	BSDC1	968.384	0.0380454	0.0293821	0	1	1	FALSE	Not DE	T1_V_T0
ENSG00000176261.16	ZBTB8OS	490.736	-0.0511001	0.0411459	0	1	1	FALSE	Not DE	T1_V_T0
ENSG00000162521.19	RBBP4	1155.69	0.0064059	0.0313274	0	1	1	FALSE	Not DE	T1_V_T0
ENSG00000162522.11	KIAA1522	62.4513	-0.260834	0.0851348	-0.714558	0.474882	1	FALSE	Not DE	T1_V_T0
ENSG00000134684.13	YARS1	752.493	-0.0779642	0.0398989	0	1	1	FALSE	Not DE	T1_V_T0
ENSG00000116497.18	S100PBP	520.655	0.0795225	0.0343462	0	1	1	FALSE	Not DE	T1_V_T0
ENSG00000287691.1	ENSG00000287691	8.21215	-0.0885785	0.413485	0	1	NA	NA	Not DE	T1_V_T0
ENSG00000116514.17	RNF19B	2432.09	-0.147983	0.0554524	0	1	1	FALSE	Not DE	T1_V_T0
ENSG00000004455.18	AK2	996.882	-0.0438872	0.0308715	0	1	1	FALSE	Not DE	T1_V_T0
ENSG00000142920.17	AZIN2	53.3601	0.162791	0.0989731	0	1	1	FALSE	Not DE	T1_V_T0
ENSG00000278997.1	ENSG00000278997	17.0661	0.137464	0.134028	0	1	1	FALSE	Not DE	T1_V_T0
ENSG00000116525.14	TRIM62	273.362	0.0522123	0.039856	0	1	1	FALSE	Not DE	T1_V_T0
ENSG00000160094.15	ZNF362	394.299	-0.0346297	0.0432055	0	1	1	FALSE	Not DE	T1_V_T0
ENSG00000184389.9	A3GALT2	45.7632	0.102951	0.109838	0	1	1	FALSE	Not DE	T1_V_T0
ENSG00000225313.5	ENSG00000225313	15.7222	0.15687	0.295917	0	1	1	FALSE	Not DE	T1_V_T0
ENSG00000134686.21	PHC2	7899.06	-0.0460978	0.0767683	0	1	1	FALSE	Not DE	T1_V_T0
ENSG00000121903.15	ZSCAN20	28.0403	-0.116254	0.100121	0	1	1	FALSE	Not DE	T1_V_T0
ENSG00000163866.9	SMIM12	607.309	-0.0516081	0.039005	0	1	1	FALSE	Not DE	T1_V_T0
ENSG00000116544.12	DLGAP3	27.3302	-0.0566365	0.132886	0	1	1	FALSE	Not DE	T1_V_T0
ENSG00000284773.1	ENSG00000284773	41.5869	0.147423	0.0963473	0	1	1	FALSE	Not DE	T1_V_T0
ENSG00000197056.11	ZMYM1	115.418	0.181574	0.060229	0	1	1	FALSE	Not DE	T1_V_T0
ENSG00000116560.12	SFPQ	2491.94	0.0185005	0.0303585	0	1	1	FALSE	Not DE	T1_V_T0
ENSG00000146463.12	ZMYM4	373.812	0.106146	0.0478065	0	1	1	FALSE	Not DE	T1_V_T0
ENSG00000142687.19	KIAA0319L	2434.28	-0.0440284	0.0601305	0	1	1	FALSE	Not DE	T1_V_T0
ENSG00000020129.16	NCDN	296.901	-0.136917	0.0519722	0	1	1	FALSE	Not DE	T1_V_T0
ENSG00000239636.3	TFAP2E-AS1	149.569	0.0962774	0.0614991	0	1	1	FALSE	Not DE	T1_V_T0
ENSG00000116819.9	TFAP2E	65.4483	-0.00770623	0.0688981	0	1	1	FALSE	Not DE	T1_V_T0
ENSG00000126067.12	PSMB2	890.397	-0.188823	0.0482947	0	1	1	FALSE	Not DE	T1_V_T0
ENSG00000142686.8	C1orf216	148.212	0.00791589	0.0580056	0	1	1	FALSE	Not DE	T1_V_T0
ENSG00000092853.14	CLSPN	19.4963	0.245983	0.131029	0.350942	0.725632	1	FALSE	Not DE	T1_V_T0
ENSG00000134698.11	AGO4	2010.12	0.15843	0.050865	0	1	1	FALSE	Not DE	T1_V_T0
ENSG00000092847.14	AGO1	844.195	0.0542741	0.028271	0	1	1	FALSE	Not DE	T1_V_T0
ENSG00000126070.20	AGO3	433.99	0.121924	0.0476825	0	1	1	FALSE	Not DE	T1_V_T0
ENSG00000271554.1	ENSG00000271554	9.2722	0.316254	0.166792	0.696998	0.485804	1	FALSE	Not DE	T1_V_T0
ENSG00000116863.11	ADPRS	815.917	-0.068146	0.0569987	0	1	1	FALSE	Not DE	T1_V_T0
ENSG00000171812.13	COL8A2	49.386	-0.408779	0.100984	-2.06745	0.0386921	0.940957	FALSE	Not DE	T1_V_T0
ENSG00000054116.12	TRAPPC3	886.249	-0.107493	0.0387859	0	1	1	FALSE	Not DE	T1_V_T0
ENSG00000116871.16	MAP7D1	3697.42	-0.0495266	0.0448791	0	1	1	FALSE	Not DE	T1_V_T0
ENSG00000054118.15	THRAP3	1907.17	-0.0405724	0.02058	0	1	1	FALSE	Not DE	T1_V_T0
ENSG00000214193.11	SH3D21	141.653	0.194513	0.0759658	0	1	1	FALSE	Not DE	T1_V_T0
ENSG00000142694.7	EVA1B	316.192	-0.151871	0.100716	0	1	1	FALSE	Not DE	T1_V_T0
ENSG00000196182.11	STK40	4963.58	-0.0633572	0.0482605	0	1	1	FALSE	Not DE	T1_V_T0
ENSG00000181817.6	LSM10	1113.82	-0.115964	0.0559056	0	1	1	FALSE	Not DE	T1_V_T0
ENSG00000116885.18	OSCP1	6.96664	0.30099	0.211208	0.478152	0.632542	NA	NA	Not DE	T1_V_T0
ENSG00000116898.12	MRPS15	410.939	-0.104949	0.0500578	0	1	1	FALSE	Not DE	T1_V_T0
ENSG00000119535.19	CSF3R	76917.1	-0.0915684	0.07621	0	1	1	FALSE	Not DE	T1_V_T0
ENSG00000233621.3	ZC3H12A-DT	110.42	-0.165292	0.081847	0	1	1	FALSE	Not DE	T1_V_T0
ENSG00000163874.11	ZC3H12A	504.531	-0.213134	0.0556568	-0.23599	0.813441	1	FALSE	Not DE	T1_V_T0
ENSG00000163875.16	MEAF6	467.787	-0.0309795	0.0423068	0	1	1	FALSE	Not DE	T1_V_T0
ENSG00000163877.11	SNIP1	240.114	-0.0653764	0.0395779	0	1	1	FALSE	Not DE	T1_V_T0
ENSG00000237749.4	ENSG00000237749	26.0543	0.1197	0.180693	0	1	1	FALSE	Not DE	T1_V_T0
ENSG00000134697.13	GNL2	355.922	-0.113463	0.050193	0	1	1	FALSE	Not DE	T1_V_T0
ENSG00000116922.15	C1orf109	59.1089	0.0768976	0.0901139	0	1	1	FALSE	Not DE	T1_V_T0
ENSG00000134690.11	CDCA8	33.0558	0.197918	0.0943139	0	1	1	FALSE	Not DE	T1_V_T0
ENSG00000185090.15	MANEAL	24.6047	-0.0422368	0.125187	0	1	1	FALSE	Not DE	T1_V_T0
ENSG00000196449.4	YRDC	83.3779	-0.0902163	0.0696922	0	1	1	FALSE	Not DE	T1_V_T0
ENSG00000197982.14	C1orf122	318.998	-0.0651867	0.0746439	0	1	1	FALSE	Not DE	T1_V_T0
ENSG00000188786.10	MTF1	622.804	-0.202525	0.058992	-0.0428103	0.965853	1	FALSE	Not DE	T1_V_T0
ENSG00000204084.13	INPP5B	606.654	0.155324	0.0428381	0	1	1	FALSE	Not DE	T1_V_T0
ENSG00000183431.12	SF3A3	913.833	0.0948175	0.0391359	0	1	1	FALSE	Not DE	T1_V_T0
ENSG00000183386.10	FHL3	995.112	0.13907	0.0631104	0	1	1	FALSE	Not DE	T1_V_T0
ENSG00000183520.12	UTP11	213.483	-0.00782621	0.043685	0	1	1	FALSE	Not DE	T1_V_T0
ENSG00000116954.8	RRAGC	384.974	-0.0573357	0.0588158	0	1	1	FALSE	Not DE	T1_V_T0
ENSG00000228436.4	RRAGC-DT	50.3276	0.0936655	0.0839732	0	1	1	FALSE	Not DE	T1_V_T0
ENSG00000174574.16	AKIRIN1	865.076	-0.0740189	0.049459	0	1	1	FALSE	Not DE	T1_V_T0
ENSG00000168653.11	NDUFS5	774.979	-0.104074	0.0632022	0	1	1	FALSE	Not DE	T1_V_T0
ENSG00000127603.32	MACF1	2290.87	0.110518	0.0423043	0	1	1	FALSE	Not DE	T1_V_T0
ENSG00000291129.1	PPIEL	214.379	0.152162	0.0589269	0	1	1	FALSE	Not DE	T1_V_T0
ENSG00000090621.15	PABPC4	1297.8	-0.0888909	0.0382049	0	1	1	FALSE	Not DE	T1_V_T0
ENSG00000116983.13	HPCAL4	58.2215	-0.0769097	0.100564	0	1	1	FALSE	Not DE	T1_V_T0
ENSG00000084072.17	PPIE	623.118	-0.0201112	0.0473397	0	1	1	FALSE	Not DE	T1_V_T0
ENSG00000116985.12	BMP8B	32.6311	0.0877758	0.101924	0	1	1	FALSE	Not DE	T1_V_T0
ENSG00000284719.3	ENSG00000284719	44.02	0.0854335	0.071685	0	1	1	FALSE	Not DE	T1_V_T0
ENSG00000043514.17	TRIT1	193.381	0.141458	0.053403	0	1	1	FALSE	Not DE	T1_V_T0
ENSG00000116990.11	MYCL	398.75	-0.121306	0.0514842	0	1	1	FALSE	Not DE	T1_V_T0
ENSG00000168389.18	MFSD2A	105.73	-0.173975	0.0776986	0	1	1	FALSE	Not DE	T1_V_T0
ENSG00000131236.18	CAP1	11873.4	-0.109227	0.0402451	0	1	1	FALSE	Not DE	T1_V_T0
ENSG00000131238.18	PPT1	3733.11	-0.183416	0.0440818	0	1	1	FALSE	Not DE	T1_V_T0
ENSG00000117000.9	RLF	411.402	0.0708177	0.0503927	0	1	1	FALSE	Not DE	T1_V_T0
ENSG00000259943.2	ZMPSTE24-DT	58.9715	0.0319056	0.0764205	0	1	1	FALSE	Not DE	T1_V_T0
ENSG00000084073.10	ZMPSTE24	410.051	-0.0830949	0.0468412	0	1	1	FALSE	Not DE	T1_V_T0
ENSG00000049089.15	COL9A2	417.724	0.418405	0.0755047	2.8926	0.00382066	0.206369	FALSE	Not DE	T1_V_T0
ENSG00000084070.12	SMAP2	14245.6	0.0307475	0.0551571	0	1	1	FALSE	Not DE	T1_V_T0
ENSG00000187801.15	ZFP69B	12.0018	-0.0463306	0.150774	0	1	1	FALSE	Not DE	T1_V_T0
ENSG00000260920.2	ENSG00000260920	17.0788	-0.305839	0.121327	-0.872344	0.383021	1	FALSE	Not DE	T1_V_T0
ENSG00000187815.10	ZFP69	53.0332	0.0556376	0.0828548	0	1	1	FALSE	Not DE	T1_V_T0
ENSG00000238287.1	EXO5-DT	22.8449	0.188	0.135489	0	1	1	FALSE	Not DE	T1_V_T0
ENSG00000164002.12	EXO5	89.167	0.032716	0.0638942	0	1	1	FALSE	Not DE	T1_V_T0
ENSG00000117010.17	ZNF684	35.9295	-0.199867	0.125646	0	1	1	FALSE	Not DE	T1_V_T0
ENSG00000117016.10	RIMS3	43.5337	0.120357	0.0872311	0	1	1	FALSE	Not DE	T1_V_T0
ENSG00000237899.1	ENSG00000237899	48.4285	0.247048	0.0835608	0.563038	0.573409	1	FALSE	Not DE	T1_V_T0
ENSG00000272145.2	NFYC-AS1	8.19684	0.158489	0.189346	0	1	NA	NA	Not DE	T1_V_T0
ENSG00000066136.21	NFYC	1756.98	-0.0817141	0.0375777	0	1	1	FALSE	Not DE	T1_V_T0
ENSG00000117013.17	KCNQ4	11.6748	0.330441	0.161133	0.809523	0.418214	1	FALSE	Not DE	T1_V_T0
ENSG00000179862.7	CITED4	113.053	0.209725	0.105389	0.0922818	0.926474	1	FALSE	Not DE	T1_V_T0
ENSG00000171793.17	CTPS1	139.55	0.0497294	0.0523524	0	1	1	FALSE	Not DE	T1_V_T0
ENSG00000281207.1	SLFNL1-AS1	26.8789	0.337697	0.117054	1.17635	0.239456	1	FALSE	Not DE	T1_V_T0
ENSG00000010803.17	SCMH1	197.545	0.190618	0.0671069	0	1	1	FALSE	Not DE	T1_V_T0
ENSG00000127124.16	HIVEP3	497.341	0.14533	0.0754113	0	1	1	FALSE	Not DE	T1_V_T0
ENSG00000198815.9	FOXJ3	640.04	0.0786838	0.0420659	0	1	1	FALSE	Not DE	T1_V_T0
ENSG00000066185.13	ZMYND12	8.16817	0.00929472	0.175329	0	1	NA	NA	Not DE	T1_V_T0
ENSG00000127125.9	PPCS	534.124	-0.112706	0.036865	0	1	1	FALSE	Not DE	T1_V_T0
ENSG00000186409.19	CCDC30	94.0924	0.0436167	0.0849804	0	1	1	FALSE	Not DE	T1_V_T0
ENSG00000236876.3	TMSB4XP1	16.3438	-0.115329	0.144089	0	1	1	FALSE	Not DE	T1_V_T0
ENSG00000171960.12	PPIH	346.575	0.0688807	0.05266	0	1	1	FALSE	Not DE	T1_V_T0
ENSG00000065978.19	YBX1	7466.19	-0.0641991	0.0553599	0	1	1	FALSE	Not DE	T1_V_T0
ENSG00000117385.16	P3H1	569.051	0.0675072	0.0436904	0	1	1	FALSE	Not DE	T1_V_T0
ENSG00000283580.4	ENSG00000283580	30.5339	0.167911	0.10161	0	1	1	FALSE	Not DE	T1_V_T0
ENSG00000177868.12	SVBP	275.075	-0.0518065	0.0529321	0	1	1	FALSE	Not DE	T1_V_T0
ENSG00000164010.15	ERMAP	253.004	0.105594	0.0529155	0	1	1	FALSE	Not DE	T1_V_T0
ENSG00000228192.10	ZNF691-DT	6.65639	0.0217812	0.201183	0	1	NA	NA	Not DE	T1_V_T0
ENSG00000164011.18	ZNF691	194.215	-0.0465247	0.0515308	0	1	1	FALSE	Not DE	T1_V_T0
ENSG00000117394.24	SLC2A1	687.001	0.28696	0.0947036	0.918233	0.358497	1	FALSE	Not DE	T1_V_T0
ENSG00000227533.7	SLC2A1-DT	24.9327	0.531425	0.147975	2.23973	0.0251082	0.717986	FALSE	Not DE	T1_V_T0
ENSG00000117395.13	EBNA1BP2	258.654	-0.093317	0.0568316	0	1	1	FALSE	Not DE	T1_V_T0
ENSG00000066056.14	TIE1	9.54819	0.285314	0.187973	0.453863	0.649928	1	FALSE	Not DE	T1_V_T0
ENSG00000117400.18	MPL	37.7637	0.0232072	0.108141	0	1	1	FALSE	Not DE	T1_V_T0
ENSG00000234694.2	CDC20-DT	13.1212	0.194501	0.137222	0	1	1	FALSE	Not DE	T1_V_T0
ENSG00000117399.14	CDC20	26.5415	0.061342	0.172369	0	1	1	FALSE	Not DE	T1_V_T0
ENSG00000066322.15	ELOVL1	1271.43	-0.119434	0.0395131	0	1	1	FALSE	Not DE	T1_V_T0
ENSG00000159479.17	MED8	431.202	-0.133519	0.0427112	0	1	1	FALSE	Not DE	T1_V_T0
ENSG00000198198.17	SZT2	1326.43	-0.0203478	0.0364379	0	1	1	FALSE	Not DE	T1_V_T0
ENSG00000178922.18	HYI	130.287	0.0961316	0.0670479	0	1	1	FALSE	Not DE	T1_V_T0
ENSG00000142949.17	PTPRF	24.1912	0.487352	0.149423	1.92307	0.0544707	1	FALSE	Not DE	T1_V_T0
ENSG00000237950.3	LINC02918	19.5457	-0.136646	0.13359	0	1	1	FALSE	Not DE	T1_V_T0
ENSG00000117408.11	IPO13	417.606	-0.0955039	0.042175	0	1	1	FALSE	Not DE	T1_V_T0
ENSG00000132768.14	DPH2	269.804	-0.0666539	0.0535908	0	1	1	FALSE	Not DE	T1_V_T0
ENSG00000117410.14	ATP6V0B	5156.71	0.0237969	0.0628439	0	1	1	FALSE	Not DE	T1_V_T0
ENSG00000117411.18	B4GALT2	34.0326	-0.0359553	0.10768	0	1	1	FALSE	Not DE	T1_V_T0
ENSG00000159214.13	CCDC24	76.8359	-0.112245	0.0783389	0	1	1	FALSE	Not DE	T1_V_T0
ENSG00000196517.13	SLC6A9	41.2592	0.436884	0.168003	1.41	0.158541	1	FALSE	Not DE	T1_V_T0
ENSG00000230615.8	ENSG00000230615	95.1532	0.177762	0.124696	0	1	1	FALSE	Not DE	T1_V_T0
ENSG00000178028.14	DMAP1	763.873	0.0543045	0.0451862	0	1	1	FALSE	Not DE	T1_V_T0
ENSG00000117419.16	ERI3	433.869	0.0349255	0.0441634	0	1	1	FALSE	Not DE	T1_V_T0
ENSG00000187147.18	RNF220	1164.16	-0.00247498	0.0341205	0	1	1	FALSE	Not DE	T1_V_T0
ENSG00000126106.14	TMEM53	50.6469	-0.0278447	0.0880248	0	1	1	FALSE	Not DE	T1_V_T0
ENSG00000198520.12	ARMH1	727.613	0.0579981	0.0648458	0	1	1	FALSE	Not DE	T1_V_T0
ENSG00000142945.13	KIF2C	28.252	0.204659	0.142368	0.0327231	0.973895	1	FALSE	Not DE	T1_V_T0
ENSG00000225721.5	ENSG00000225721	12.3491	0.21349	0.148389	0.0909082	0.927566	1	FALSE	Not DE	T1_V_T0
ENSG00000142937.12	RPS8	13600.2	-0.0613709	0.0498738	0	1	1	FALSE	Not DE	T1_V_T0
ENSG00000142959.5	BEST4	12.5813	-0.00924573	0.152913	0	1	1	FALSE	Not DE	T1_V_T0
ENSG00000173846.13	PLK3	374.595	-0.00710476	0.0541334	0	1	1	FALSE	Not DE	T1_V_T0
ENSG00000222009.9	BTBD19	65.3529	-0.211604	0.0921856	-0.125876	0.89983	1	FALSE	Not DE	T1_V_T0
ENSG00000117425.14	PTCH2	23.2306	-0.0928246	0.124767	0	1	1	FALSE	Not DE	T1_V_T0
ENSG00000070785.17	EIF2B3	175.878	-0.00945368	0.0517074	0	1	1	FALSE	Not DE	T1_V_T0
ENSG00000126107.15	HECTD3	798.018	-0.010966	0.0485665	0	1	1	FALSE	Not DE	T1_V_T0
ENSG00000126088.14	UROD	651.157	0.0626721	0.0624206	0	1	1	FALSE	Not DE	T1_V_T0
ENSG00000162415.7	ZSWIM5	59.6575	0.435325	0.0928891	2.5334	0.0112963	0.421805	FALSE	Not DE	T1_V_T0
ENSG00000132773.12	TOE1	162.806	-0.119749	0.0485309	0	1	1	FALSE	Not DE	T1_V_T0
ENSG00000280670.3	CCDC163	38.8864	0.132763	0.0908597	0	1	1	FALSE	Not DE	T1_V_T0
ENSG00000132763.15	MMACHC	30.4926	-0.149905	0.0984464	0	1	1	FALSE	Not DE	T1_V_T0
ENSG00000117450.15	PRDX1	1280.99	-0.174745	0.0501653	0	1	1	FALSE	Not DE	T1_V_T0
ENSG00000117448.14	AKR1A1	984.492	-0.230574	0.0534015	-0.572526	0.566966	1	FALSE	Not DE	T1_V_T0
ENSG00000132780.17	NASP	857.218	-0.234554	0.0482854	-0.71563	0.47422	1	FALSE	Not DE	T1_V_T0
ENSG00000159588.15	CCDC17	246.093	-0.175868	0.0731718	0	1	1	FALSE	Not DE	T1_V_T0
ENSG00000159592.11	GPBP1L1	1665.56	-0.0636449	0.0322662	0	1	1	FALSE	Not DE	T1_V_T0
ENSG00000159596.7	TMEM69	194.489	-0.139237	0.0422111	0	1	1	FALSE	Not DE	T1_V_T0
ENSG00000197429.11	IPP	70.8649	0.113956	0.0748261	0	1	1	FALSE	Not DE	T1_V_T0
ENSG00000086015.23	MAST2	231.4	0.00606903	0.0475468	0	1	1	FALSE	Not DE	T1_V_T0
ENSG00000117461.15	PIK3R3	47.8592	-0.040312	0.0905557	0	1	1	FALSE	Not DE	T1_V_T0
ENSG00000085998.15	POMGNT1	319.706	-0.00265377	0.048988	0	1	1	FALSE	Not DE	T1_V_T0
ENSG00000085999.13	RAD54L	10.4505	0.184165	0.192581	0	1	1	FALSE	Not DE	T1_V_T0
ENSG00000132128.18	LRRC41	543.873	-0.123233	0.0410608	0	1	1	FALSE	Not DE	T1_V_T0
ENSG00000173660.12	UQCRH	1068.51	-0.131392	0.0517278	0	1	1	FALSE	Not DE	T1_V_T0
ENSG00000117481.11	NSUN4	165.572	0.0237025	0.0451779	0	1	1	FALSE	Not DE	T1_V_T0
ENSG00000117480.16	FAAH	334.864	0.419923	0.0693361	3.17184	0.00151475	0.107457	FALSE	Not DE	T1_V_T0
ENSG00000232022.10	FAAHP1	14.1393	0.193948	0.152107	0	1	1	FALSE	Not DE	T1_V_T0
ENSG00000291138.1	ENSG00000291138	28.7043	0.362603	0.122481	1.32757	0.184319	1	FALSE	Not DE	T1_V_T0
ENSG00000079277.22	MKNK1	1733.64	-0.106773	0.064949	0	1	1	FALSE	Not DE	T1_V_T0
ENSG00000123472.13	ATPAF1	279.074	-0.0661834	0.0408992	0	1	1	FALSE	Not DE	T1_V_T0
ENSG00000159658.15	EFCAB14	1202.96	-0.0889611	0.0306378	0	1	1	FALSE	Not DE	T1_V_T0
ENSG00000224805.2	LINC00853	51.2351	-0.0943243	0.10208	0	1	1	FALSE	Not DE	T1_V_T0
ENSG00000162366.8	PDZK1IP1	1505.77	0.617901	0.118273	3.53337	0.000410298	0.0435595	TRUE	DE Up	T1_V_T0
ENSG00000162367.12	TAL1	606.461	0.203966	0.0924665	0.0428882	0.965791	1	FALSE	Not DE	T1_V_T0
ENSG00000123473.17	STIL	34.09	0.530977	0.170699	1.93895	0.0525073	1	FALSE	Not DE	T1_V_T0
ENSG00000162368.15	CMPK1	1120.93	-0.00639523	0.0399563	0	1	1	FALSE	Not DE	T1_V_T0
ENSG00000237424.1	FOXD2-AS1	59.9341	-0.138425	0.0865186	0	1	1	FALSE	Not DE	T1_V_T0
ENSG00000186564.6	FOXD2	10.1923	0.0921382	0.164296	0	1	1	FALSE	Not DE	T1_V_T0
ENSG00000117834.13	SLC5A9	29.4167	0.207964	0.12628	0.0630673	0.949713	1	FALSE	Not DE	T1_V_T0
ENSG00000272491.1	ENSG00000272491	7.26297	0.342497	0.244752	0.582209	0.560426	NA	NA	Not DE	T1_V_T0
ENSG00000132122.12	SPATA6	126.95	0.407692	0.0802585	2.58779	0.00965947	0.378366	FALSE	Not DE	T1_V_T0
ENSG00000186094.18	AGBL4	10.1329	0.492437	0.324709	0.900614	0.367793	1	FALSE	Not DE	T1_V_T0
ENSG00000185104.21	FAF1	501.873	0.111015	0.0618917	0	1	1	FALSE	Not DE	T1_V_T0
ENSG00000123080.12	CDKN2C	68.5271	-0.00279516	0.0641852	0	1	1	FALSE	Not DE	T1_V_T0
ENSG00000123091.5	RNF11	1335.92	0.217037	0.083354	0.204395	0.838045	1	FALSE	Not DE	T1_V_T0
ENSG00000085831.16	TTC39A	8.46087	0.312547	0.20523	0.548396	0.58342	1	FALSE	Not DE	T1_V_T0
ENSG00000085832.18	EPS15	979.506	-0.0174288	0.0513646	0	1	1	FALSE	Not DE	T1_V_T0
ENSG00000227070.2	EPS15-AS1	18.7078	-0.0459197	0.133021	0	1	1	FALSE	Not DE	T1_V_T0
ENSG00000117859.19	OSBPL9	496.398	0.0640435	0.0536996	0	1	1	FALSE	Not DE	T1_V_T0
ENSG00000078618.23	NRDC	3853.89	-0.0293613	0.0457248	0	1	1	FALSE	Not DE	T1_V_T0
ENSG00000117862.13	TXNDC12	95.9134	-0.0952376	0.0642848	0	1	1	FALSE	Not DE	T1_V_T0
ENSG00000134717.18	BTF3L4	359.514	-0.0616898	0.0394013	0	1	1	FALSE	Not DE	T1_V_T0
ENSG00000157077.16	ZFYVE9	28.2453	0.368486	0.122875	1.3712	0.170313	1	FALSE	Not DE	T1_V_T0
ENSG00000154222.15	CC2D1B	733.814	-0.0216666	0.0284175	0	1	1	FALSE	Not DE	T1_V_T0
ENSG00000085840.13	ORC1	18.0351	0.253792	0.131148	0.410163	0.681686	1	FALSE	Not DE	T1_V_T0
ENSG00000134748.13	PRPF38A	546.707	-0.00698123	0.033942	0	1	1	FALSE	Not DE	T1_V_T0
ENSG00000134744.14	TUT4	474.073	0.153475	0.0623813	0	1	1	FALSE	Not DE	T1_V_T0
ENSG00000116157.6	GPX7	93.4496	0.00571432	0.0722457	0	1	1	FALSE	Not DE	T1_V_T0
ENSG00000182183.15	SHISAL2A	219.649	0.0367514	0.0785064	0	1	1	FALSE	Not DE	T1_V_T0
ENSG00000162377.6	COA7	46.3935	-0.161502	0.0853691	0	1	1	FALSE	Not DE	T1_V_T0
ENSG00000162378.13	ZYG11B	299.427	0.198931	0.0520263	0	1	1	FALSE	Not DE	T1_V_T0
ENSG00000228929.1	RPS13P2	35.264	-0.0679733	0.129457	0	1	1	FALSE	Not DE	T1_V_T0
ENSG00000121310.17	ECHDC2	634.444	0.190254	0.0584144	0	1	1	FALSE	Not DE	T1_V_T0
ENSG00000116171.19	SCP2	477.8	-0.100032	0.0576246	0	1	1	FALSE	Not DE	T1_V_T0
ENSG00000174348.14	PODN	20.3758	0.101449	0.152811	0	1	1	FALSE	Not DE	T1_V_T0
ENSG00000162383.13	SLC1A7	52.4716	0.172514	0.114374	0	1	1	FALSE	Not DE	T1_V_T0
ENSG00000157184.7	CPT2	232.06	-0.0817337	0.0488939	0	1	1	FALSE	Not DE	T1_V_T0
ENSG00000236723.2	ENSG00000236723	9.52229	-0.0516605	0.160803	0	1	1	FALSE	Not DE	T1_V_T0
ENSG00000162384.14	CZIB	441.663	-0.104213	0.0358198	0	1	1	FALSE	Not DE	T1_V_T0
ENSG00000162385.11	MAGOH	316.702	-0.169877	0.0424433	0	1	1	FALSE	Not DE	T1_V_T0
ENSG00000157193.18	LRP8	98.6142	0.243953	0.0601975	0.730152	0.465297	1	FALSE	Not DE	T1_V_T0
ENSG00000230138.2	LINC02812	11.1211	-0.0756725	0.164701	0	1	1	FALSE	Not DE	T1_V_T0
ENSG00000058804.12	NDC1	133.734	0.0514124	0.0562533	0	1	1	FALSE	Not DE	T1_V_T0
ENSG00000058799.15	YIPF1	980.056	-0.161958	0.0573073	0	1	1	FALSE	Not DE	T1_V_T0
ENSG00000081870.12	HSPB11	252.795	0.0363121	0.0439344	0	1	1	FALSE	Not DE	T1_V_T0
ENSG00000116212.15	LRRC42	114.663	0.0254569	0.0544078	0	1	1	FALSE	Not DE	T1_V_T0
ENSG00000116209.12	TMEM59	2930.93	-0.16175	0.0500559	0	1	1	FALSE	Not DE	T1_V_T0
ENSG00000116205.14	TCEANC2	225.385	-0.024019	0.0369857	0	1	1	FALSE	Not DE	T1_V_T0
ENSG00000256407.2	ENSG00000256407	8.54405	0.374046	0.182082	0.955869	0.339138	1	FALSE	Not DE	T1_V_T0
ENSG00000116221.15	MRPL37	480.017	-0.125831	0.0455616	0	1	1	FALSE	Not DE	T1_V_T0
ENSG00000157216.17	SSBP3	1117.24	0.126841	0.0548896	0	1	1	FALSE	Not DE	T1_V_T0
ENSG00000162390.18	ACOT11	54.6545	0.569157	0.122198	3.02098	0.00251956	0.154527	FALSE	Not DE	T1_V_T0
ENSG00000243725.7	TTC4	8.60532	0.18851	0.209219	0	1	1	FALSE	Not DE	T1_V_T0
ENSG00000162396.6	PARS2	39.4245	-0.0528172	0.0874904	0	1	1	FALSE	Not DE	T1_V_T0
ENSG00000006555.11	TTC22	191.473	0.0690942	0.0584992	0	1	1	FALSE	Not DE	T1_V_T0
ENSG00000162398.12	LEXM	20.2893	0.280895	0.139908	0.578203	0.563127	1	FALSE	Not DE	T1_V_T0
ENSG00000116133.13	DHCR24	101.767	-0.0477217	0.0777857	0	1	1	FALSE	Not DE	T1_V_T0
ENSG00000162402.15	USP24	947.657	0.0940305	0.0380845	0	1	1	FALSE	Not DE	T1_V_T0
ENSG00000234810.4	ENSG00000234810	21.5655	-0.0606681	0.160242	0	1	1	FALSE	Not DE	T1_V_T0
ENSG00000173406.16	DAB1	73.5819	0.514924	0.131359	2.39743	0.0165106	0.550138	FALSE	Not DE	T1_V_T0
ENSG00000184292.7	TACSTD2	24.8644	0.469573	0.176005	1.53162	0.125615	1	FALSE	Not DE	T1_V_T0
ENSG00000162601.12	MYSM1	271.955	0.128468	0.0795744	0	1	1	FALSE	Not DE	T1_V_T0
ENSG00000283445.1	ENSG00000283445	7.28197	0.944068	0.251969	2.95301	0.00314688	NA	NA	Not DE	T1_V_T0
ENSG00000177606.8	JUN	124.792	0.170982	0.0742963	0	1	1	FALSE	Not DE	T1_V_T0
ENSG00000234807.8	LINC01135	58.5758	0.16184	0.110924	0	1	1	FALSE	Not DE	T1_V_T0
ENSG00000232453.7	LINC02777	9.85624	0.197151	0.157275	0	1	1	FALSE	Not DE	T1_V_T0
ENSG00000237352.6	LINC01358	14.0795	0.245366	0.170233	0.266495	0.789858	1	FALSE	Not DE	T1_V_T0
ENSG00000172456.18	FGGY	163.413	0.302145	0.103429	0.98758	0.323359	1	FALSE	Not DE	T1_V_T0
ENSG00000134709.13	HOOK1	30.4312	0.0555899	0.109852	0	1	1	FALSE	Not DE	T1_V_T0
ENSG00000162599.18	NFIA	130.155	0.31579	0.0987201	1.17292	0.240829	1	FALSE	Not DE	T1_V_T0
ENSG00000162604.12	TM2D1	293.44	0.135066	0.0542168	0	1	1	FALSE	Not DE	T1_V_T0
ENSG00000132849.22	PATJ	217.53	0.272852	0.0889578	0.818954	0.412813	1	FALSE	Not DE	T1_V_T0
ENSG00000240563.2	L1TD1	11.1723	-0.642245	0.191878	-2.30482	0.0211765	0.653287	FALSE	Not DE	T1_V_T0
ENSG00000162607.13	USP1	336.337	0.00946798	0.0518389	0	1	1	FALSE	Not DE	T1_V_T0
ENSG00000116641.18	DOCK7	52.5489	-0.0959951	0.0934601	0	1	1	FALSE	Not DE	T1_V_T0
ENSG00000125703.15	ATG4C	179.87	0.0558957	0.052833	0	1	1	FALSE	Not DE	T1_V_T0
ENSG00000088035.18	ALG6	232.829	0.123447	0.0493033	0	1	1	FALSE	Not DE	T1_V_T0
ENSG00000142856.17	ITGB3BP	135.879	0.179127	0.047484	0	1	1	FALSE	Not DE	T1_V_T0
ENSG00000203965.13	EFCAB7	30.9539	0.220135	0.0985951	0.204216	0.838185	1	FALSE	Not DE	T1_V_T0
ENSG00000079739.17	PGM1	500.877	-0.0152761	0.0440081	0	1	1	FALSE	Not DE	T1_V_T0
ENSG00000158966.16	CACHD1	19.4144	0.168692	0.143876	0	1	1	FALSE	Not DE	T1_V_T0
ENSG00000162437.15	RAVER2	28.4846	0.174309	0.099945	0	1	1	FALSE	Not DE	T1_V_T0
ENSG00000162434.14	JAK1	5554.81	0.10864	0.0310914	0	1	1	FALSE	Not DE	T1_V_T0
ENSG00000162433.15	AK4	15.2729	-0.125846	0.138066	0	1	1	FALSE	Not DE	T1_V_T0
ENSG00000116675.16	DNAJC6	30.999	0.729128	0.160419	3.29841	0.000972355	0.0809104	FALSE	Not DE	T1_V_T0
ENSG00000116678.20	LEPR	93.9314	0.136069	0.0916017	0	1	1	FALSE	Not DE	T1_V_T0
ENSG00000184588.18	PDE4B	1059.73	-0.129609	0.0587078	0	1	1	FALSE	Not DE	T1_V_T0
ENSG00000118473.23	SGIP1	20.4842	0.572579	0.189624	1.96483	0.049434	1	FALSE	Not DE	T1_V_T0
ENSG00000152760.10	DYNLT5	5.95648	0.395413	0.245113	0.797236	0.425314	NA	NA	Not DE	T1_V_T0
ENSG00000152763.17	DNAI4	18.81	0.199298	0.13227	0	1	1	FALSE	Not DE	T1_V_T0
ENSG00000198160.15	MIER1	802.16	-0.0410523	0.0583686	0	1	1	FALSE	Not DE	T1_V_T0
ENSG00000116704.8	SLC35D1	179.658	0.0774092	0.0572251	0	1	1	FALSE	Not DE	T1_V_T0
ENSG00000162594.17	IL23R	8.60885	-0.232684	0.187777	-0.174057	0.861821	1	FALSE	Not DE	T1_V_T0
ENSG00000081985.14	IL12RB2	74.3351	0.129522	0.0831159	0	1	1	FALSE	Not DE	T1_V_T0
ENSG00000142864.15	SERBP1	1575.03	-0.0573849	0.0304049	0	1	1	FALSE	Not DE	T1_V_T0
ENSG00000116717.13	GADD45A	132.802	0.187604	0.0746117	0	1	1	FALSE	Not DE	T1_V_T0
ENSG00000116729.14	WLS	960.69	0.029349	0.0853665	0	1	1	FALSE	Not DE	T1_V_T0
ENSG00000033122.21	LRRC7	14.4097	0.217775	0.218016	0.081533	0.935018	1	FALSE	Not DE	T1_V_T0
ENSG00000066557.6	LRRC40	77.4186	0.215216	0.0949618	0.160231	0.872699	1	FALSE	Not DE	T1_V_T0
ENSG00000116754.14	SRSF11	1572.61	0.223555	0.055133	0.427246	0.6692	1	FALSE	Not DE	T1_V_T0
ENSG00000118454.13	ANKRD13C	188.143	0.230773	0.0611185	0.503496	0.614616	1	FALSE	Not DE	T1_V_T0
ENSG00000197568.15	HHLA3	42.8815	-0.124748	0.103841	0	1	1	FALSE	Not DE	T1_V_T0
ENSG00000050628.21	PTGER3	9.51924	0.081469	0.190603	0	1	1	FALSE	Not DE	T1_V_T0
ENSG00000132485.14	ZRANB2	688.03	0.122337	0.0576925	0	1	1	FALSE	Not DE	T1_V_T0
ENSG00000229956.11	ZRANB2-DT	9.23378	0.34336	0.238694	0.6006	0.548107	1	FALSE	Not DE	T1_V_T0
ENSG00000172260.15	NEGR1	32.7978	0.303914	0.139529	0.744753	0.456421	1	FALSE	Not DE	T1_V_T0
ENSG00000162620.16	LRRIQ3	7.72185	-0.0582867	0.204125	0	1	NA	NA	Not DE	T1_V_T0
ENSG00000116791.14	CRYZ	96.5387	0.0314291	0.0851038	0	1	1	FALSE	Not DE	T1_V_T0
ENSG00000162623.16	TYW3	135.783	0.0203809	0.0589338	0	1	1	FALSE	Not DE	T1_V_T0
ENSG00000137968.17	SLC44A5	5.84317	0.459069	0.361523	0.716604	0.473619	NA	NA	Not DE	T1_V_T0
ENSG00000117054.15	ACADM	178.809	0.00490238	0.0696509	0	1	1	FALSE	Not DE	T1_V_T0
ENSG00000137955.16	RABGGTB	387.517	0.0766334	0.0429583	0	1	1	FALSE	Not DE	T1_V_T0
ENSG00000057468.7	MSH4	15.4007	0.0188888	0.145126	0	1	1	FALSE	Not DE	T1_V_T0
ENSG00000184005.11	ST6GALNAC3	286.043	0.438797	0.132182	1.80658	0.070827	1	FALSE	Not DE	T1_V_T0
ENSG00000226415.1	TPI1P1	12.177	-0.209364	0.129965	-0.0720468	0.942565	1	FALSE	Not DE	T1_V_T0
ENSG00000142892.15	PIGK	174.607	0.076988	0.0564255	0	1	1	FALSE	Not DE	T1_V_T0
ENSG00000226084.5	ENSG00000226084	31.7392	-0.18448	0.111548	0	1	1	FALSE	Not DE	T1_V_T0
ENSG00000154027.19	AK5	91.8226	0.131237	0.0927568	0	1	1	FALSE	Not DE	T1_V_T0
ENSG00000036549.13	ZZZ3	283.628	0.18045	0.0669299	0	1	1	FALSE	Not DE	T1_V_T0
ENSG00000077254.14	USP33	656.834	0.0566213	0.0465014	0	1	1	FALSE	Not DE	T1_V_T0
ENSG00000180488.16	MIGA1	120.039	0.174215	0.077426	0	1	1	FALSE	Not DE	T1_V_T0
ENSG00000162614.19	NEXN	66.2106	-0.446877	0.118623	-2.08119	0.0374163	0.924536	FALSE	Not DE	T1_V_T0
ENSG00000162613.18	FUBP1	695.116	0.104473	0.0432619	0	1	1	FALSE	Not DE	T1_V_T0
ENSG00000137960.6	GIPC2	8.70032	0.238639	0.187839	0.205701	0.837024	1	FALSE	Not DE	T1_V_T0
ENSG00000137959.17	IFI44L	1193.5	-0.877759	0.184762	-3.66827	0.000244195	0.0293682	TRUE	DE Down	T1_V_T0
ENSG00000137965.11	IFI44	1844.25	-0.6189	0.154724	-2.7074	0.00678115	0.304341	FALSE	Not DE	T1_V_T0
ENSG00000234184.8	LINC01781	21.7479	-0.337918	0.144598	-0.953802	0.340184	1	FALSE	Not DE	T1_V_T0
ENSG00000233008.8	LINC01725	21.3733	0.380777	0.168917	1.07021	0.284523	1	FALSE	Not DE	T1_V_T0
ENSG00000137941.17	TTLL7	11.8552	0.240719	0.169555	0.240154	0.810211	1	FALSE	Not DE	T1_V_T0
ENSG00000271576.2	PRKACB-DT	7.60734	0.170459	0.19779	0	1	NA	NA	Not DE	T1_V_T0
ENSG00000142875.20	PRKACB	629.638	-0.0103348	0.0605497	0	1	1	FALSE	Not DE	T1_V_T0
ENSG00000117133.11	RPF1	350.892	-0.0880251	0.0469006	0	1	1	FALSE	Not DE	T1_V_T0
ENSG00000285851.1	ENSG00000285851	184.745	0.111909	0.100202	0	1	1	FALSE	Not DE	T1_V_T0
ENSG00000122432.19	SPATA1	19.4738	0.0784101	0.120288	0	1	1	FALSE	Not DE	T1_V_T0
ENSG00000117151.13	CTBS	255.396	0.00435935	0.0777849	0	1	1	FALSE	Not DE	T1_V_T0
ENSG00000284882.2	ENSG00000284882	180.441	-0.0249812	0.0741367	0	1	1	FALSE	Not DE	T1_V_T0
ENSG00000117155.17	SSX2IP	115.803	0.0573493	0.0671824	0	1	1	FALSE	Not DE	T1_V_T0
ENSG00000153898.13	MCOLN2	197.631	0.157775	0.0653856	0	1	1	FALSE	Not DE	T1_V_T0
ENSG00000162643.13	DNAI3	13.5318	0.245585	0.177804	0.256379	0.797658	1	FALSE	Not DE	T1_V_T0
ENSG00000055732.13	MCOLN3	6.24529	0.386994	0.222343	0.841015	0.400339	NA	NA	Not DE	T1_V_T0
ENSG00000097096.10	SYDE2	7.47674	0.205365	0.201186	0.0266658	0.978726	NA	NA	Not DE	T1_V_T0
ENSG00000162642.14	C1orf52	330.179	0.0265022	0.046061	0	1	1	FALSE	Not DE	T1_V_T0
ENSG00000142867.14	BCL10	376.203	-0.177063	0.0419048	0	1	1	FALSE	Not DE	T1_V_T0
ENSG00000223653.6	BCL10-AS1	16.7409	0.13226	0.154568	0	1	1	FALSE	Not DE	T1_V_T0
ENSG00000117174.11	ZNHIT6	142.397	0.0299892	0.0661752	0	1	1	FALSE	Not DE	T1_V_T0
ENSG00000171502.15	COL24A1	13.3201	0.381619	0.169706	1.07019	0.284532	1	FALSE	Not DE	T1_V_T0
ENSG00000285210.1	LINC02795	7.66666	0.335258	0.201009	0.672895	0.501014	NA	NA	Not DE	T1_V_T0
ENSG00000122417.16	ODF2L	250.328	0.229539	0.0649136	0.455044	0.649078	1	FALSE	Not DE	T1_V_T0
ENSG00000236915.3	CLCA4-AS1	20.3851	0.17366	0.116999	0	1	1	FALSE	Not DE	T1_V_T0
ENSG00000097033.15	SH3GLB1	2053.19	-0.210531	0.0745523	-0.141258	0.887667	1	FALSE	Not DE	T1_V_T0
ENSG00000183291.18	SELENOF	1349.39	-0.0502385	0.0390199	0	1	1	FALSE	Not DE	T1_V_T0
ENSG00000153936.18	HS2ST1	80.2757	0.302272	0.149997	0.681828	0.495348	1	FALSE	Not DE	T1_V_T0
ENSG00000143013.13	LMO4	496.567	-0.0355745	0.0381335	0	1	1	FALSE	Not DE	T1_V_T0
ENSG00000237505.8	PKN2-AS1	27.1996	0.182982	0.149648	0	1	1	FALSE	Not DE	T1_V_T0
ENSG00000065243.20	PKN2	1097.31	0.279539	0.0839517	0.947439	0.343415	1	FALSE	Not DE	T1_V_T0
ENSG00000137947.12	GTF2B	667.302	-0.0878877	0.0403021	0	1	1	FALSE	Not DE	T1_V_T0
ENSG00000137944.18	KYAT3	353.988	0.109558	0.0428763	0	1	1	FALSE	Not DE	T1_V_T0
ENSG00000117226.12	GBP3	589.572	-0.508652	0.0912186	-3.38366	0.000715275	0.0641685	FALSE	Not DE	T1_V_T0
ENSG00000117228.11	GBP1	3255.3	-0.649344	0.142168	-3.16066	0.0015741	0.110496	FALSE	Not DE	T1_V_T0
ENSG00000234518.2	PTGES3P1	205.765	-0.385185	0.0969676	-1.90976	0.056164	1	FALSE	Not DE	T1_V_T0
ENSG00000162645.13	GBP2	11336.3	-0.331982	0.08379	-1.57515	0.115222	1	FALSE	Not DE	T1_V_T0
ENSG00000162654.9	GBP4	1678.78	-0.592243	0.119088	-3.29373	0.000988684	0.0810906	FALSE	Not DE	T1_V_T0
ENSG00000284734.1	ENSG00000284734	21.6379	-0.155009	0.110771	0	1	1	FALSE	Not DE	T1_V_T0
ENSG00000154451.15	GBP5	9480.06	-0.660478	0.142714	-3.22657	0.00125285	0.0954772	FALSE	Not DE	T1_V_T0
ENSG00000237568.1	ENSG00000237568	37.3766	-0.869965	0.312935	-2.14091	0.0322816	0.845447	FALSE	Not DE	T1_V_T0
ENSG00000183347.15	GBP6	68.9779	-0.990896	0.191175	-4.13703	3.51831e-05	0.00722145	TRUE	DE Down	T1_V_T0
ENSG00000225492.7	GBP1P1	24.9676	-1.6523	0.29871	-4.86191	1.16261e-06	0.000688353	TRUE	DE Down	T1_V_T0
ENSG00000197147.15	LRRC8B	152.096	0.0368861	0.071688	0	1	1	FALSE	Not DE	T1_V_T0
ENSG00000231999.8	LRRC8C-DT	53.6696	0.0684754	0.0739121	0	1	1	FALSE	Not DE	T1_V_T0
ENSG00000271949.1	ENSG00000271949	10.7002	0.519003	0.188073	1.69617	0.0898546	1	FALSE	Not DE	T1_V_T0
ENSG00000272931.1	LRRC8D-DT	10.8622	0.19705	0.158676	0	1	1	FALSE	Not DE	T1_V_T0
ENSG00000171492.14	LRRC8D	363.449	-0.148971	0.0518302	0	1	1	FALSE	Not DE	T1_V_T0
ENSG00000162664.17	ZNF326	153.005	0.173377	0.0629921	0	1	1	FALSE	Not DE	T1_V_T0
ENSG00000122482.22	ZNF644	350.59	0.121035	0.0720143	0	1	1	FALSE	Not DE	T1_V_T0
ENSG00000162669.16	HFM1	332.731	0.292287	0.17394	0.530567	0.595719	1	FALSE	Not DE	T1_V_T0
ENSG00000097046.13	CDC7	77.9888	0.173288	0.0698813	0	1	1	FALSE	Not DE	T1_V_T0
ENSG00000069702.11	TGFBR3	437.507	0.192823	0.0838042	0	1	1	FALSE	Not DE	T1_V_T0
ENSG00000189195.15	BTBD8	35.2779	0.179783	0.109607	0	1	1	FALSE	Not DE	T1_V_T0
ENSG00000174842.17	GLMN	126.016	0.343722	0.072608	1.97942	0.0477684	1	FALSE	Not DE	T1_V_T0
ENSG00000122484.9	RPAP2	240.625	0.0782202	0.0519335	0	1	1	FALSE	Not DE	T1_V_T0
ENSG00000162676.13	GFI1	195.439	0.166766	0.0757591	0	1	1	FALSE	Not DE	T1_V_T0
ENSG00000067208.17	EVI5	332.79	0.240929	0.0893792	0.457928	0.647004	1	FALSE	Not DE	T1_V_T0
ENSG00000122406.14	RPL5	8997.36	-0.00842646	0.0472278	0	1	1	FALSE	Not DE	T1_V_T0
ENSG00000154511.12	DIPK1A	227.547	0.0311331	0.0995772	0	1	1	FALSE	Not DE	T1_V_T0
ENSG00000143033.18	MTF2	312.915	0.0774947	0.0479575	0	1	1	FALSE	Not DE	T1_V_T0
ENSG00000117500.13	TMED5	585.675	-0.0741573	0.0477328	0	1	1	FALSE	Not DE	T1_V_T0
ENSG00000122483.18	CCDC18	98.2808	0.280902	0.0867302	0.932803	0.350922	1	FALSE	Not DE	T1_V_T0
ENSG00000223745.8	CCDC18-AS1	554.242	0.154973	0.0418201	0	1	1	FALSE	Not DE	T1_V_T0
ENSG00000117505.13	DR1	788.282	-0.0570348	0.0439044	0	1	1	FALSE	Not DE	T1_V_T0
ENSG00000137942.18	FNBP1L	34.4103	0.039213	0.109886	0	1	1	FALSE	Not DE	T1_V_T0
ENSG00000137936.18	BCAR3	32.428	0.187475	0.111207	0	1	1	FALSE	Not DE	T1_V_T0
ENSG00000224093.7	BCAR3-AS1	9.50546	0.0384678	0.197505	0	1	1	FALSE	Not DE	T1_V_T0
ENSG00000067334.14	DNTTIP2	469.736	-0.0922298	0.044045	0	1	1	FALSE	Not DE	T1_V_T0
ENSG00000023909.10	GCLM	115.139	0.0194487	0.0717295	0	1	1	FALSE	Not DE	T1_V_T0
ENSG00000137962.13	ARHGAP29	6.74933	0.314121	0.233025	0.489737	0.62432	NA	NA	Not DE	T1_V_T0
ENSG00000117528.14	ABCD3	203.69	0.0854487	0.0593772	0	1	1	FALSE	Not DE	T1_V_T0
ENSG00000117519.16	CNN3	8.51365	-0.46693	0.185595	-1.43824	0.150366	1	FALSE	Not DE	T1_V_T0
ENSG00000172339.10	ALG14	42.925	0.102041	0.0765008	0	1	1	FALSE	Not DE	T1_V_T0
ENSG00000228502.1	EEF1A1P11	41.1082	-0.0234263	0.156323	0	1	1	FALSE	Not DE	T1_V_T0
ENSG00000137970.7	RPL7P9	141.624	-0.0303387	0.100965	0	1	1	FALSE	Not DE	T1_V_T0
ENSG00000117569.20	PTBP2	226.967	0.186467	0.0710631	0	1	1	FALSE	Not DE	T1_V_T0
ENSG00000188641.14	DPYD	2603.24	0.0954315	0.0931872	0	1	1	FALSE	Not DE	T1_V_T0
ENSG00000156869.14	FRRS1	84.0763	0.245916	0.0938073	0.489474	0.624506	1	FALSE	Not DE	T1_V_T0
ENSG00000162688.17	AGL	161.749	0.140127	0.0610438	0	1	1	FALSE	Not DE	T1_V_T0
ENSG00000288826.1	ENSG00000288826	6.84897	-0.0842945	0.180932	0	1	NA	NA	Not DE	T1_V_T0
ENSG00000156876.10	SASS6	18.8513	-0.0231722	0.165073	0	1	1	FALSE	Not DE	T1_V_T0
ENSG00000122435.11	TRMT13	149.706	0.0834659	0.0703472	0	1	1	FALSE	Not DE	T1_V_T0
ENSG00000122477.13	LRRC39	12.6361	0.19784	0.158367	0	1	1	FALSE	Not DE	T1_V_T0
ENSG00000137992.15	DBT	108.066	-0.0625183	0.0576824	0	1	1	FALSE	Not DE	T1_V_T0
ENSG00000224616.5	RTCA-AS1	43.1458	0.191771	0.101149	0	1	1	FALSE	Not DE	T1_V_T0
ENSG00000137996.13	RTCA	368.302	-0.0520863	0.0334289	0	1	1	FALSE	Not DE	T1_V_T0
ENSG00000079335.20	CDC14A	423.015	0.279154	0.0926174	0.854638	0.392751	1	FALSE	Not DE	T1_V_T0
ENSG00000234332.1	BCAS2P2	6.51068	0.187873	0.209648	0	1	NA	NA	Not DE	T1_V_T0
ENSG00000162694.14	EXTL2	28.602	0.123826	0.106995	0	1	1	FALSE	Not DE	T1_V_T0
ENSG00000162695.12	SLC30A7	359.578	0.0323667	0.0567707	0	1	1	FALSE	Not DE	T1_V_T0
ENSG00000117543.22	DPH5	235.202	0.0422016	0.0548769	0	1	1	FALSE	Not DE	T1_V_T0
ENSG00000233184.9	DPH5-DT	168.026	0.218207	0.0728389	0.249967	0.802613	1	FALSE	Not DE	T1_V_T0
ENSG00000225938.3	S1PR1-DT	19.6109	0.0380809	0.134387	0	1	1	FALSE	Not DE	T1_V_T0
ENSG00000170989.10	S1PR1	790.832	-0.0925071	0.0808399	0	1	1	FALSE	Not DE	T1_V_T0
ENSG00000183298.5	RPSAP19	14.0768	0.00947113	0.177844	0	1	1	FALSE	Not DE	T1_V_T0
ENSG00000224613.7	RNPC3-DT	7.61264	0.648701	0.217981	2.05844	0.0395475	NA	NA	Not DE	T1_V_T0
ENSG00000185946.16	RNPC3	165.081	-0.028986	0.0787718	0	1	1	FALSE	Not DE	T1_V_T0
ENSG00000240038.7	AMY2B	271.849	0.227614	0.0571393	0.483276	0.6289	1	FALSE	Not DE	T1_V_T0
ENSG00000198890.9	PRMT6	88.9603	-0.101224	0.0702661	0	1	1	FALSE	Not DE	T1_V_T0
ENSG00000134215.16	VAV3	729.804	0.216063	0.0790166	0.203291	0.838908	1	FALSE	Not DE	T1_V_T0
ENSG00000230489.1	VAV3-AS1	18.1792	0.00455606	0.143606	0	1	1	FALSE	Not DE	T1_V_T0
ENSG00000226822.4	LINC02785	58.1705	0.099659	0.0986754	0	1	1	FALSE	Not DE	T1_V_T0
ENSG00000085491.17	SLC25A24	165.061	0.0197145	0.0798184	0	1	1	FALSE	Not DE	T1_V_T0
ENSG00000162636.16	FAM102B	229.945	0.0299492	0.0501935	0	1	1	FALSE	Not DE	T1_V_T0
ENSG00000162639.16	HENMT1	305.845	0.171011	0.0445469	0	1	1	FALSE	Not DE	T1_V_T0
ENSG00000290126.1	ENSG00000290126	12.3183	0.126259	0.153689	0	1	1	FALSE	Not DE	T1_V_T0
ENSG00000134186.12	PRPF38B	985.63	0.125653	0.0484977	0	1	1	FALSE	Not DE	T1_V_T0
ENSG00000116266.11	STXBP3	621.971	0.110279	0.0703362	0	1	1	FALSE	Not DE	T1_V_T0
ENSG00000121957.15	GPSM2	61.2988	0.316081	0.082624	1.40494	0.160041	1	FALSE	Not DE	T1_V_T0
ENSG00000085433.17	WDR47	129.171	0.0522787	0.064962	0	1	1	FALSE	Not DE	T1_V_T0
ENSG00000244716.3	ENSG00000244716	19.8194	-0.0546877	0.103979	0	1	1	FALSE	Not DE	T1_V_T0
ENSG00000228665.2	ENSG00000228665	6.74732	0.0271267	0.236792	0	1	NA	NA	Not DE	T1_V_T0
ENSG00000197780.11	TAF13	126.715	-0.0541395	0.0701438	0	1	1	FALSE	Not DE	T1_V_T0
ENSG00000273382.1	TMEM167B-DT	10.1887	0.0798158	0.153274	0	1	1	FALSE	Not DE	T1_V_T0
ENSG00000215717.7	TMEM167B	1042.78	-0.151238	0.0522919	0	1	1	FALSE	Not DE	T1_V_T0
ENSG00000116299.17	ELAPOR1	1076.43	0.103814	0.0862022	0	1	1	FALSE	Not DE	T1_V_T0
ENSG00000031698.13	SARS1	1551.19	-0.123949	0.0411061	0	1	1	FALSE	Not DE	T1_V_T0
ENSG00000143126.8	CELSR2	56.7013	-0.0738089	0.0927898	0	1	1	FALSE	Not DE	T1_V_T0
ENSG00000134222.16	PSRC1	161.602	0.108951	0.0540478	0	1	1	FALSE	Not DE	T1_V_T0
ENSG00000134243.12	SORT1	1005.22	-0.328418	0.0716026	-1.79348	0.0728957	1	FALSE	Not DE	T1_V_T0
ENSG00000143106.13	PSMA5	1100	-0.184501	0.0429742	0	1	1	FALSE	Not DE	T1_V_T0
ENSG00000162650.17	ATXN7L2	163.815	-0.0287012	0.056493	0	1	1	FALSE	Not DE	T1_V_T0
ENSG00000174151.15	CYB561D1	617.254	-0.0177191	0.0400621	0	1	1	FALSE	Not DE	T1_V_T0
ENSG00000181754.7	AMIGO1	130.417	0.0204106	0.082412	0	1	1	FALSE	Not DE	T1_V_T0
ENSG00000290117.1	ENSG00000290117	7.23938	0.682056	0.203738	2.36606	0.0179784	NA	NA	Not DE	T1_V_T0
ENSG00000065135.12	GNAI3	1390.91	-0.0808824	0.0452162	0	1	1	FALSE	Not DE	T1_V_T0
ENSG00000116337.20	AMPD2	5062.84	0.249175	0.057772	0.851186	0.394666	1	FALSE	Not DE	T1_V_T0
ENSG00000168765.19	GSTM4	274.115	0.172156	0.074775	0	1	1	FALSE	Not DE	T1_V_T0
ENSG00000213366.13	GSTM2	487.493	0.408281	0.083722	2.48777	0.0128548	0.464451	FALSE	Not DE	T1_V_T0
ENSG00000134201.12	GSTM5	7.08148	-0.0921599	0.245259	0	1	NA	NA	Not DE	T1_V_T0
ENSG00000134202.12	GSTM3	44.8807	-0.0541824	0.0904282	0	1	1	FALSE	Not DE	T1_V_T0
ENSG00000184371.14	CSF1	241.402	0.169152	0.0720217	0	1	1	FALSE	Not DE	T1_V_T0
ENSG00000168710.18	AHCYL1	829.56	-0.00322716	0.0296491	0	1	1	FALSE	Not DE	T1_V_T0
ENSG00000143093.15	STRIP1	648.797	-0.0970332	0.0344662	0	1	1	FALSE	Not DE	T1_V_T0
ENSG00000116396.15	KCNC4	63.7251	0.0761317	0.0755266	0	1	1	FALSE	Not DE	T1_V_T0
ENSG00000227963.2	RBM15-AS1	42.9918	0.105838	0.079254	0	1	1	FALSE	Not DE	T1_V_T0
ENSG00000162775.17	RBM15	274.484	0.0618228	0.0415676	0	1	1	FALSE	Not DE	T1_V_T0
ENSG00000224699.11	LAMTOR5-AS1	100.755	0.229845	0.0832988	0.358289	0.720127	1	FALSE	Not DE	T1_V_T0
ENSG00000168679.18	SLC16A4	9.74212	0.0857063	0.169682	0	1	1	FALSE	Not DE	T1_V_T0
ENSG00000134248.14	LAMTOR5	643.79	-0.0316262	0.049414	0	1	1	FALSE	Not DE	T1_V_T0
ENSG00000177301.16	KCNA2	20.7505	0.0070219	0.124288	0	1	1	FALSE	Not DE	T1_V_T0
ENSG00000177272.10	KCNA3	322.679	-0.0380981	0.0729216	0	1	1	FALSE	Not DE	T1_V_T0
ENSG00000288803.1	ENSG00000288803	13.5857	0.15543	0.144964	0	1	1	FALSE	Not DE	T1_V_T0
ENSG00000143119.14	CD53	11931.6	-0.276698	0.0546772	-1.40274	0.160694	1	FALSE	Not DE	T1_V_T0
ENSG00000232811.1	ENSG00000232811	8.74914	0.219832	0.199129	0.099592	0.920668	1	FALSE	Not DE	T1_V_T0
ENSG00000121931.16	LRIF1	198.714	0.065815	0.068496	0	1	1	FALSE	Not DE	T1_V_T0
ENSG00000156171.15	DRAM2	877.354	-0.169327	0.033951	0	1	1	FALSE	Not DE	T1_V_T0
ENSG00000134255.16	CEPT1	424.938	-0.136406	0.0484083	0	1	1	FALSE	Not DE	T1_V_T0
ENSG00000272982.1	ENSG00000272982	13.5283	-0.0504677	0.186862	0	1	1	FALSE	Not DE	T1_V_T0
ENSG00000273221.1	ENSG00000273221	36.53	-0.0586253	0.0967948	0	1	1	FALSE	Not DE	T1_V_T0
ENSG00000162777.17	DENND2D	1818.99	0.026464	0.0397451	0	1	1	FALSE	Not DE	T1_V_T0
ENSG00000064886.14	CHI3L2	203.046	-0.0226527	0.0639595	0	1	1	FALSE	Not DE	T1_V_T0
ENSG00000085465.13	OVGP1	67.8503	0.2961	0.089923	1.0687	0.285207	1	FALSE	Not DE	T1_V_T0
ENSG00000260948.1	ENSG00000260948	9.51693	0.219799	0.168977	0.117169	0.906726	1	FALSE	Not DE	T1_V_T0
ENSG00000243960.1	ENSG00000243960	10.3067	-0.0840549	0.173766	0	1	1	FALSE	Not DE	T1_V_T0
ENSG00000116455.14	WDR77	176.571	-0.10676	0.0569201	0	1	1	FALSE	Not DE	T1_V_T0
ENSG00000116459.11	ATP5PB	1364.59	-0.0922869	0.0360559	0	1	1	FALSE	Not DE	T1_V_T0
ENSG00000143110.12	C1orf162	2975.68	-0.285702	0.060099	-1.42601	0.153865	1	FALSE	Not DE	T1_V_T0
ENSG00000121933.19	TMIGD3	40.1907	0.248606	0.107806	0.450864	0.652087	1	FALSE	Not DE	T1_V_T0
ENSG00000116473.15	RAP1A	2039.83	0.0455028	0.0505025	0	1	1	FALSE	Not DE	T1_V_T0
ENSG00000231346.5	LINC01160	15.6789	0.0267816	0.126512	0	1	1	FALSE	Not DE	T1_V_T0
ENSG00000197852.12	INKA2	2415.93	0.109289	0.0614971	0	1	1	FALSE	Not DE	T1_V_T0
ENSG00000227811.3	INKA2-AS1	53.1444	-0.0573451	0.0935858	0	1	1	FALSE	Not DE	T1_V_T0
ENSG00000064703.13	DDX20	171.327	-0.00017104	0.0585843	0	1	1	FALSE	Not DE	T1_V_T0
ENSG00000171385.11	KCND3	18.2983	0.258639	0.142658	0.411048	0.681038	1	FALSE	Not DE	T1_V_T0
ENSG00000231437.3	LINC01750	13.7004	-0.161053	0.159031	0	1	1	FALSE	Not DE	T1_V_T0
ENSG00000231246.3	LINC02884	26.8921	0.131914	0.124626	0	1	1	FALSE	Not DE	T1_V_T0
ENSG00000143079.15	CTTNBP2NL	24.6179	-0.0381855	0.116958	0	1	1	FALSE	Not DE	T1_V_T0
ENSG00000134245.18	WNT2B	9.88299	-0.167506	0.15416	0	1	1	FALSE	Not DE	T1_V_T0
ENSG00000007341.19	ST7L	132.432	-0.0396382	0.0559484	0	1	1	FALSE	Not DE	T1_V_T0
ENSG00000116489.13	CAPZA1	4367.11	-0.128066	0.0513986	0	1	1	FALSE	Not DE	T1_V_T0
ENSG00000155363.19	MOV10	1543.19	-0.549508	0.0943513	-3.70433	0.000211951	0.0269651	TRUE	DE Down	T1_V_T0
ENSG00000155366.17	RHOC	787.083	-0.277493	0.0809048	-0.957831	0.338148	1	FALSE	Not DE	T1_V_T0
ENSG00000155367.16	PPM1J	14.3167	-0.0713838	0.150228	0	1	1	FALSE	Not DE	T1_V_T0
ENSG00000155380.13	SLC16A1	77.2827	0.0444596	0.0724834	0	1	1	FALSE	Not DE	T1_V_T0
ENSG00000226419.8	SLC16A1-AS1	86.7435	0.150894	0.0741011	0	1	1	FALSE	Not DE	T1_V_T0
ENSG00000198799.12	LRIG2	258.959	0.13093	0.0513323	0	1	1	FALSE	Not DE	T1_V_T0
ENSG00000081026.19	MAGI3	30.5889	0.211716	0.117868	0.0994018	0.920819	1	FALSE	Not DE	T1_V_T0
ENSG00000116793.16	PHTF1	356.376	-0.0585159	0.0681741	0	1	1	FALSE	Not DE	T1_V_T0
ENSG00000081019.14	RSBN1	330.964	-0.010271	0.0660272	0	1	1	FALSE	Not DE	T1_V_T0
ENSG00000134242.16	PTPN22	378.392	0.238926	0.0627067	0.62077	0.534751	1	FALSE	Not DE	T1_V_T0
ENSG00000188761.13	BCL2L15	23.4471	0.54926	0.131374	2.65851	0.00784875	0.32922	FALSE	Not DE	T1_V_T0
ENSG00000134262.13	AP4B1	573.395	0.146387	0.0388051	0	1	1	FALSE	Not DE	T1_V_T0
ENSG00000118655.8	DCLRE1B	91.6663	-0.179506	0.0607675	0	1	1	FALSE	Not DE	T1_V_T0
ENSG00000163349.22	HIPK1	1325.02	0.107767	0.0576751	0	1	1	FALSE	Not DE	T1_V_T0
ENSG00000197323.12	TRIM33	700.549	0.143128	0.0547009	0	1	1	FALSE	Not DE	T1_V_T0
ENSG00000116752.6	BCAS2	209.03	-0.146085	0.0478379	0	1	1	FALSE	Not DE	T1_V_T0
ENSG00000175984.15	DENND2C	15.8635	0.273377	0.146129	0.502139	0.61557	1	FALSE	Not DE	T1_V_T0
ENSG00000213281.5	NRAS	335.737	-0.11334	0.0500542	0	1	1	FALSE	Not DE	T1_V_T0
ENSG00000009307.17	CSDE1	4001.45	-0.0771732	0.032872	0	1	1	FALSE	Not DE	T1_V_T0
ENSG00000052723.12	SIKE1	200.286	-0.0106713	0.0509203	0	1	1	FALSE	Not DE	T1_V_T0
ENSG00000134198.10	TSPAN2	346.625	0.0282342	0.0693145	0	1	1	FALSE	Not DE	T1_V_T0
ENSG00000233730.2	LINC01765	37.9052	-0.135989	0.128857	0	1	1	FALSE	Not DE	T1_V_T0
ENSG00000173218.15	VANGL1	44.8213	0.0382918	0.0789404	0	1	1	FALSE	Not DE	T1_V_T0
ENSG00000163393.13	SLC22A15	359.461	0.238091	0.0768978	0.49535	0.620353	1	FALSE	Not DE	T1_V_T0
ENSG00000173212.5	MAB21L3	9.1112	-0.101581	0.207761	0	1	1	FALSE	Not DE	T1_V_T0
ENSG00000163399.16	ATP1A1	2632.35	-0.183123	0.0364058	0	1	1	FALSE	Not DE	T1_V_T0
ENSG00000203865.13	ATP1A1-AS1	54.6904	-0.0251905	0.0835486	0	1	1	FALSE	Not DE	T1_V_T0
ENSG00000233154.6	LINC01762	87.7476	-0.163481	0.0980612	0	1	1	FALSE	Not DE	T1_V_T0
ENSG00000224950.2	ENSG00000224950	107.354	-0.109824	0.0810197	0	1	1	FALSE	Not DE	T1_V_T0
ENSG00000116815.16	CD58	873.439	0.0441891	0.0508154	0	1	1	FALSE	Not DE	T1_V_T0
ENSG00000116824.5	CD2	2072.45	-0.00477818	0.0584766	0	1	1	FALSE	Not DE	T1_V_T0
ENSG00000225079.2	FTH1P22	19.1388	0.146021	0.146248	0	1	1	FALSE	Not DE	T1_V_T0
ENSG00000134247.10	PTGFRN	24.1356	-0.17558	0.117639	0	1	1	FALSE	Not DE	T1_V_T0
ENSG00000134256.13	CD101	553.122	0.00690731	0.0632279	0	1	1	FALSE	Not DE	T1_V_T0
ENSG00000116830.12	TTF2	104.115	-0.00553801	0.0684104	0	1	1	FALSE	Not DE	T1_V_T0
ENSG00000198162.12	MAN1A2	357.826	0.137865	0.0915014	0	1	1	FALSE	Not DE	T1_V_T0
ENSG00000183508.5	TENT5C	2553.71	0.423203	0.142025	1.57157	0.11605	1	FALSE	Not DE	T1_V_T0
ENSG00000196505.11	GDAP2	314.79	0.0088363	0.0531479	0	1	1	FALSE	Not DE	T1_V_T0
ENSG00000065183.16	WDR3	132.774	0.0271086	0.0707689	0	1	1	FALSE	Not DE	T1_V_T0
ENSG00000116874.12	WARS2	73.1249	-0.0112467	0.0657764	0	1	1	FALSE	Not DE	T1_V_T0
ENSG00000231365.7	WARS2-AS1	180.992	0.197175	0.0654909	0	1	1	FALSE	Not DE	T1_V_T0
ENSG00000260941.1	LINC00622	7.1958	-0.0669021	0.205405	0	1	NA	NA	Not DE	T1_V_T0
ENSG00000143067.5	ZNF697	37.1202	0.327909	0.103248	1.23886	0.215397	1	FALSE	Not DE	T1_V_T0
ENSG00000092621.13	PHGDH	48.7739	0.0651464	0.100481	0	1	1	FALSE	Not DE	T1_V_T0
ENSG00000134193.15	REG4	9.74932	-0.385541	0.201298	-0.921723	0.356673	1	FALSE	Not DE	T1_V_T0
ENSG00000134250.21	NOTCH2	3308.28	-0.0730856	0.0515771	0	1	1	FALSE	Not DE	T1_V_T0
ENSG00000265808.4	SEC22B	547.917	-0.101488	0.0467642	0	1	1	FALSE	Not DE	T1_V_T0
ENSG00000290569.1	ENSG00000290569	33.3266	-0.162453	0.107142	0	1	1	FALSE	Not DE	T1_V_T0
ENSG00000270231.5	NBPF8	145.183	0.137389	0.0833817	0	1	1	FALSE	Not DE	T1_V_T0
ENSG00000275131.4	PDE4DIPP2	47.9132	0.145335	0.0996623	0	1	1	FALSE	Not DE	T1_V_T0
ENSG00000273136.8	NBPF26	191.992	0.0629998	0.083858	0	1	1	FALSE	Not DE	T1_V_T0
ENSG00000281741.2	ENSG00000281741	6.72721	-0.36889	0.253559	-0.666079	0.505361	NA	NA	Not DE	T1_V_T0
ENSG00000226067.7	LINC00623	705.321	-0.122703	0.0454234	0	1	1	FALSE	Not DE	T1_V_T0
ENSG00000291135.1	FCGR1BP	144.127	-0.493288	0.156551	-1.87343	0.0610091	1	FALSE	Not DE	T1_V_T0
ENSG00000188610.12	FAM72B	9.02336	0.0395022	0.174061	0	1	1	FALSE	Not DE	T1_V_T0
ENSG00000171943.12	SRGAP2C	156.436	0.0572016	0.0844452	0	1	1	FALSE	Not DE	T1_V_T0
ENSG00000227082.3	LINC02798	6.51929	0.122045	0.230839	0	1	NA	NA	Not DE	T1_V_T0
ENSG00000272583.2	ENSG00000272583	8.26902	-0.0239643	0.180656	0	1	NA	NA	Not DE	T1_V_T0
ENSG00000291141.1	EMBP1	56.3683	0.0484668	0.107969	0	1	1	FALSE	Not DE	T1_V_T0
ENSG00000265531.3	FCGR1CP	366.238	-0.952829	0.181155	-4.15571	3.24276e-05	0.00693319	TRUE	DE Down	T1_V_T0
ENSG00000270872.2	SRGAP2D	11.5467	0.0810269	0.205828	0	1	1	FALSE	Not DE	T1_V_T0
ENSG00000266338.7	NBPF15	171.865	0.070442	0.0754814	0	1	1	FALSE	Not DE	T1_V_T0
ENSG00000196369.12	SRGAP2B	125.053	0.24965	0.11202	0.44322	0.657607	1	FALSE	Not DE	T1_V_T0
ENSG00000290867.1	LINC01145	441.944	-0.0483414	0.0546533	0	1	1	FALSE	Not DE	T1_V_T0
ENSG00000281571.2	ENSG00000281571	29.3801	-0.348836	0.127166	-1.1704	0.241838	1	FALSE	Not DE	T1_V_T0
ENSG00000162825.18	NBPF20	53.9862	-0.0344032	0.0781073	0	1	1	FALSE	Not DE	T1_V_T0
ENSG00000291005.1	NBPF25P	9.84509	-0.0235982	0.144476	0	1	1	FALSE	Not DE	T1_V_T0
ENSG00000117262.19	GPR89A	72.8934	0.207629	0.0689938	0.110581	0.911949	1	FALSE	Not DE	T1_V_T0
ENSG00000117281.16	CD160	138.558	0.0539442	0.0884938	0	1	1	FALSE	Not DE	T1_V_T0
ENSG00000265491.5	RNF115	457.072	0.0800556	0.0366958	0	1	1	FALSE	Not DE	T1_V_T0
ENSG00000186141.10	POLR3C	334.523	-0.045814	0.0378395	0	1	1	FALSE	Not DE	T1_V_T0
ENSG00000186364.12	NUDT17	71.1004	-0.0145206	0.0697067	0	1	1	FALSE	Not DE	T1_V_T0
ENSG00000131788.16	PIAS3	219.762	-0.0173123	0.054613	0	1	1	FALSE	Not DE	T1_V_T0
ENSG00000198483.13	ANKRD35	13.3091	0.175749	0.145373	0	1	1	FALSE	Not DE	T1_V_T0
ENSG00000143127.13	ITGA10	35.5212	-0.13276	0.0908429	0	1	1	FALSE	Not DE	T1_V_T0
ENSG00000131779.11	PEX11B	377.588	-0.0308757	0.0373636	0	1	1	FALSE	Not DE	T1_V_T0
ENSG00000211451.13	GNRHR2	8.84853	0.104456	0.190849	0	1	1	FALSE	Not DE	T1_V_T0
ENSG00000265241.8	RBM8A	141.598	-0.121794	0.0586802	0	1	1	FALSE	Not DE	T1_V_T0
ENSG00000271601.4	LIX1L	632.209	0.00355055	0.0404149	0	1	1	FALSE	Not DE	T1_V_T0
ENSG00000272031.3	ANKRD34A	25.0091	0.0931106	0.10527	0	1	1	FALSE	Not DE	T1_V_T0
ENSG00000121851.13	POLR3GL	399.924	-0.0580941	0.0535218	0	1	1	FALSE	Not DE	T1_V_T0
ENSG00000265972.6	TXNIP	43931.7	-0.0867943	0.0483712	0	1	1	FALSE	Not DE	T1_V_T0
ENSG00000271425.9	NBPF10	167.554	-0.0695319	0.0630345	0	1	1	FALSE	Not DE	T1_V_T0
ENSG00000290578.1	ENSG00000290578	49.2537	0.291653	0.0888434	1.03162	0.30225	1	FALSE	Not DE	T1_V_T0
ENSG00000287978.1	ENSG00000287978	88.4203	0.0836037	0.0840599	0	1	1	FALSE	Not DE	T1_V_T0
ENSG00000268043.9	NBPF12	202.901	0.0737386	0.059171	0	1	1	FALSE	Not DE	T1_V_T0
ENSG00000227242.4	ENSG00000227242	13.1106	0.195475	0.207605	0	1	1	FALSE	Not DE	T1_V_T0
ENSG00000131791.8	PRKAB2	176.75	0.0951593	0.0625052	0	1	1	FALSE	Not DE	T1_V_T0
ENSG00000237188.5	ENSG00000237188	56.2578	0.100876	0.0839946	0	1	1	FALSE	Not DE	T1_V_T0
ENSG00000131781.13	FMO5	84.6057	-0.0311239	0.0740361	0	1	1	FALSE	Not DE	T1_V_T0
ENSG00000116128.12	BCL9	100.559	-0.0919739	0.062457	0	1	1	FALSE	Not DE	T1_V_T0
ENSG00000162836.12	ACP6	146.683	0.20475	0.0539917	0.0879703	0.9299	1	FALSE	Not DE	T1_V_T0
ENSG00000188092.15	GPR89B	112.352	0.269285	0.0628727	1.10198	0.270469	1	FALSE	Not DE	T1_V_T0
ENSG00000263956.8	NBPF11	174.915	0.199879	0.0661499	0	1	1	FALSE	Not DE	T1_V_T0
ENSG00000198658.4	ABHD17AP1	42.6542	0.207075	0.100849	0.070154	0.944071	1	FALSE	Not DE	T1_V_T0
ENSG00000274020.4	LINC01138	732.219	-0.0470952	0.0452295	0	1	1	FALSE	Not DE	T1_V_T0
ENSG00000291232.1	ENSG00000291232	26.9166	0.248832	0.112259	0.434989	0.66357	1	FALSE	Not DE	T1_V_T0
ENSG00000280649.2	ENSG00000280649	97.732	-0.264915	0.0862697	-0.752469	0.451769	1	FALSE	Not DE	T1_V_T0
ENSG00000270629.7	NBPF14	364.084	-0.0894648	0.048175	0	1	1	FALSE	Not DE	T1_V_T0
ENSG00000178104.22	PDE4DIP	233.324	0.0454543	0.0451717	0	1	1	FALSE	Not DE	T1_V_T0
ENSG00000269713.9	NBPF9	100.678	-0.0273086	0.0768784	0	1	1	FALSE	Not DE	T1_V_T0
ENSG00000274265.5	ENSG00000274265	139.89	-0.161602	0.0825911	0	1	1	FALSE	Not DE	T1_V_T0
ENSG00000289614.2	ENSG00000289614	25.689	-0.183369	0.112961	0	1	1	FALSE	Not DE	T1_V_T0
ENSG00000286185.1	ENSG00000286185	66.1787	0.129283	0.105381	0	1	1	FALSE	Not DE	T1_V_T0
ENSG00000288867.1	PPIAL4C	8.31201	0.206409	0.221365	0.028954	0.976901	1	FALSE	Not DE	T1_V_T0
ENSG00000291158.1	LINC00869	423.82	0.0975806	0.0346581	0	1	1	FALSE	Not DE	T1_V_T0
ENSG00000150337.14	FCGR1A	2344.64	-0.773339	0.158375	-3.62014	0.000294441	0.0338255	TRUE	DE Down	T1_V_T0
ENSG00000203814.7	H2BC18	254	-0.28851	0.103523	-0.854978	0.392563	1	FALSE	Not DE	T1_V_T0
ENSG00000270882.3	H4C14	16.7675	-0.340395	0.155615	-0.902198	0.366952	1	FALSE	Not DE	T1_V_T0
ENSG00000290791.1	ENSG00000290791	136.57	-0.0454533	0.0820294	0	1	1	FALSE	Not DE	T1_V_T0
ENSG00000290792.1	ENSG00000290792	136.625	-0.040656	0.0853113	0	1	1	FALSE	Not DE	T1_V_T0
ENSG00000184678.11	H2BC21	1329.63	-0.39009	0.0859274	-2.21222	0.0269514	0.754346	FALSE	Not DE	T1_V_T0
ENSG00000184260.6	H2AC20	24.5971	-0.0441418	0.153018	0	1	1	FALSE	Not DE	T1_V_T0
ENSG00000178096.9	BOLA1	121.031	0.0255518	0.0638188	0	1	1	FALSE	Not DE	T1_V_T0
ENSG00000159164.10	SV2A	32.3767	0.349706	0.100929	1.48328	0.138	1	FALSE	Not DE	T1_V_T0
ENSG00000143368.10	SF3B4	1334.54	-0.143405	0.0534829	0	1	1	FALSE	Not DE	T1_V_T0
ENSG00000014914.21	MTMR11	386.295	-0.143306	0.0592757	0	1	1	FALSE	Not DE	T1_V_T0
ENSG00000264522.6	OTUD7B	75.2	0.151649	0.071908	0	1	1	FALSE	Not DE	T1_V_T0
ENSG00000285184.5	ENSG00000285184	11.3706	0.188123	0.140605	0	1	1	FALSE	Not DE	T1_V_T0
ENSG00000136631.16	VPS45	487.167	-0.053721	0.0367449	0	1	1	FALSE	Not DE	T1_V_T0
ENSG00000023902.14	PLEKHO1	5842.67	-0.208566	0.0672428	-0.127389	0.898633	1	FALSE	Not DE	T1_V_T0
ENSG00000285554.1	LINC02988	50.2561	0.0703622	0.0964584	0	1	1	FALSE	Not DE	T1_V_T0
ENSG00000143401.15	ANP32E	353.093	0.0526944	0.0615929	0	1	1	FALSE	Not DE	T1_V_T0
ENSG00000117362.13	APH1A	1967.39	-0.126148	0.0375765	0	1	1	FALSE	Not DE	T1_V_T0
ENSG00000118292.9	C1orf54	40.1566	-0.0727741	0.0846051	0	1	1	FALSE	Not DE	T1_V_T0
ENSG00000266472.6	MRPS21	621.334	-0.0437073	0.0520439	0	1	1	FALSE	Not DE	T1_V_T0
ENSG00000117360.13	PRPF3	993.244	0.0617885	0.0308799	0	1	1	FALSE	Not DE	T1_V_T0
ENSG00000163125.16	RPRD2	527.498	-0.047167	0.0421345	0	1	1	FALSE	Not DE	T1_V_T0
ENSG00000143374.18	TARS2	233.318	-0.116346	0.0533682	0	1	1	FALSE	Not DE	T1_V_T0
ENSG00000143369.15	ECM1	22.7504	-0.167874	0.111987	0	1	1	FALSE	Not DE	T1_V_T0
ENSG00000237781.3	ADAMTSL4-AS2	884.681	-0.602068	0.122238	-3.28923	0.00100461	0.0818248	FALSE	Not DE	T1_V_T0
ENSG00000143382.16	ADAMTSL4	1335.96	-0.120925	0.0603359	0	1	1	FALSE	Not DE	T1_V_T0
ENSG00000203804.5	ADAMTSL4-AS1	45.994	-0.318666	0.149074	-0.796021	0.42602	1	FALSE	Not DE	T1_V_T0
ENSG00000143384.14	MCL1	18390	-0.100293	0.0499254	0	1	1	FALSE	Not DE	T1_V_T0
ENSG00000143420.19	ENSA	1691.37	-0.0545715	0.0306836	0	1	1	FALSE	Not DE	T1_V_T0
ENSG00000288880.2	ENSG00000288880	22.7871	0.0825125	0.106824	0	1	1	FALSE	Not DE	T1_V_T0
ENSG00000143457.11	GOLPH3L	290.334	-0.18652	0.0576953	0	1	1	FALSE	Not DE	T1_V_T0
ENSG00000143452.16	HORMAD1	35.8675	-0.170583	0.134843	0	1	1	FALSE	Not DE	T1_V_T0
ENSG00000163131.12	CTSS	18854.3	-0.134996	0.0480147	0	1	1	FALSE	Not DE	T1_V_T0
ENSG00000143387.14	CTSK	197.583	0.198979	0.0517577	0	1	1	FALSE	Not DE	T1_V_T0
ENSG00000143437.21	ARNT	576.196	0.0115064	0.0304829	0	1	1	FALSE	Not DE	T1_V_T0
ENSG00000143379.13	SETDB1	990.877	-0.0804801	0.0309118	0	1	1	FALSE	Not DE	T1_V_T0
ENSG00000143418.20	CERS2	1827.78	-0.015704	0.0363023	0	1	1	FALSE	Not DE	T1_V_T0
ENSG00000143412.10	ANXA9	11.9472	0.02321	0.159777	0	1	1	FALSE	Not DE	T1_V_T0
ENSG00000143409.17	MINDY1	1483.7	-0.120249	0.0535674	0	1	1	FALSE	Not DE	T1_V_T0
ENSG00000143363.17	PRUNE1	462.158	-0.0987878	0.0425757	0	1	1	FALSE	Not DE	T1_V_T0
ENSG00000163141.20	BNIPL	51.473	-0.0655038	0.0972877	0	1	1	FALSE	Not DE	T1_V_T0
ENSG00000143443.10	C1orf56	49.9253	-0.124197	0.103592	0	1	1	FALSE	Not DE	T1_V_T0
ENSG00000197622.13	CDC42SE1	10507.5	0.00911882	0.0431482	0	1	1	FALSE	Not DE	T1_V_T0
ENSG00000213190.4	MLLT11	40.0457	-0.194734	0.09215	0	1	1	FALSE	Not DE	T1_V_T0
ENSG00000143458.12	GABPB2	278.852	0.0739356	0.0437835	0	1	1	FALSE	Not DE	T1_V_T0
ENSG00000143434.17	SEMA6C	59.1569	0.232058	0.0830198	0.386148	0.699387	1	FALSE	Not DE	T1_V_T0
ENSG00000163156.12	SCNM1	1128.08	-0.145717	0.0540681	0	1	1	FALSE	Not DE	T1_V_T0
ENSG00000163155.12	LYSMD1	30.1074	-0.33718	0.108933	-1.2593	0.207921	1	FALSE	Not DE	T1_V_T0
ENSG00000163157.15	TMOD4	89.3972	-0.0594382	0.0605741	0	1	1	FALSE	Not DE	T1_V_T0
ENSG00000163159.15	VPS72	517.591	-0.0834377	0.0459781	0	1	1	FALSE	Not DE	T1_V_T0
ENSG00000143398.20	PIP5K1A	590.04	-0.0382555	0.0375485	0	1	1	FALSE	Not DE	T1_V_T0
ENSG00000159352.16	PSMD4	2468.3	-0.0808988	0.0573632	0	1	1	FALSE	Not DE	T1_V_T0
ENSG00000232671.8	ZNF687-AS1	20.3999	-0.0277415	0.114038	0	1	1	FALSE	Not DE	T1_V_T0
ENSG00000143373.18	ZNF687	710.767	-0.113477	0.0530707	0	1	1	FALSE	Not DE	T1_V_T0
ENSG00000143393.17	PI4KB	2138.83	-0.0177224	0.0379934	0	1	1	FALSE	Not DE	T1_V_T0
ENSG00000143390.18	RFX5	576.566	-0.310104	0.0531084	-2.0732	0.0381539	0.935256	FALSE	Not DE	T1_V_T0
ENSG00000237976.2	RFX5-AS1	8.35479	-0.112906	0.191129	0	1	1	FALSE	Not DE	T1_V_T0
ENSG00000143416.21	SELENBP1	1503.42	0.290636	0.166562	0.544159	0.586332	1	FALSE	Not DE	T1_V_T0
ENSG00000159377.11	PSMB4	2917.15	-0.109723	0.0469376	0	1	1	FALSE	Not DE	T1_V_T0
ENSG00000143442.23	POGZ	860.775	0.0599392	0.0294708	0	1	1	FALSE	Not DE	T1_V_T0
ENSG00000143367.17	TUFT1	65.486	-0.0257881	0.0798804	0	1	1	FALSE	Not DE	T1_V_T0
ENSG00000143376.14	SNX27	1292.73	-0.0958559	0.0554637	0	1	1	FALSE	Not DE	T1_V_T0
ENSG00000227045.1	ENSG00000227045	11.3749	-0.0359269	0.17933	0	1	1	FALSE	Not DE	T1_V_T0
ENSG00000143436.11	MRPL9	417.841	-0.0846384	0.0465251	0	1	1	FALSE	Not DE	T1_V_T0
ENSG00000249602.1	ENSG00000249602	21.8403	-0.00454554	0.11887	0	1	1	FALSE	Not DE	T1_V_T0
ENSG00000182134.17	TDRKH	63.5678	0.035211	0.0773748	0	1	1	FALSE	Not DE	T1_V_T0
ENSG00000203288.6	TDRKH-AS1	11.0277	0.00908189	0.163329	0	1	1	FALSE	Not DE	T1_V_T0
ENSG00000143365.20	RORC	112.874	-0.0120136	0.0836572	0	1	1	FALSE	Not DE	T1_V_T0
ENSG00000234614.1	C2CD4D-AS1	19.6377	0.129515	0.138845	0	1	1	FALSE	Not DE	T1_V_T0
ENSG00000196407.12	THEM5	29.9481	0.273721	0.170939	0.431267	0.666274	1	FALSE	Not DE	T1_V_T0
ENSG00000159445.13	THEM4	360.443	0.124926	0.0617926	0	1	1	FALSE	Not DE	T1_V_T0
ENSG00000197747.9	S100A10	2559.42	-0.137138	0.0564793	0	1	1	FALSE	Not DE	T1_V_T0
ENSG00000229021.2	ENSG00000229021	39.418	-0.26835	0.339585	-0.201276	0.840483	1	FALSE	Not DE	T1_V_T0
ENSG00000163191.6	S100A11	19304.7	-0.178178	0.0839805	0	1	1	FALSE	Not DE	T1_V_T0
ENSG00000289062.2	ENSG00000289062	8.26552	0.144221	0.218136	0	1	NA	NA	Not DE	T1_V_T0
ENSG00000163220.11	S100A9	190958	-0.373499	0.114849	-1.51068	0.13087	1	FALSE	Not DE	T1_V_T0
ENSG00000163221.9	S100A12	5970.49	-0.299064	0.12796	-0.774176	0.438827	1	FALSE	Not DE	T1_V_T0
ENSG00000143546.10	S100A8	74517.1	-0.306734	0.122402	-0.871998	0.38321	1	FALSE	Not DE	T1_V_T0
ENSG00000238279.3	ENSG00000238279	35.1492	-0.171798	0.344124	0	1	1	FALSE	Not DE	T1_V_T0
ENSG00000197956.10	S100A6	13802.4	-0.0792517	0.073257	0	1	1	FALSE	Not DE	T1_V_T0
ENSG00000196420.8	S100A5	13.3189	0.0363054	0.159135	0	1	1	FALSE	Not DE	T1_V_T0
ENSG00000196154.12	S100A4	16408.3	0.0640959	0.0753725	0	1	1	FALSE	Not DE	T1_V_T0
ENSG00000189171.15	S100A13	23.1538	0.0667923	0.133782	0	1	1	FALSE	Not DE	T1_V_T0
ENSG00000160679.13	CHTOP	1576.28	-0.0246343	0.0306706	0	1	1	FALSE	Not DE	T1_V_T0
ENSG00000143553.11	SNAPIN	327.837	-0.111413	0.0469389	0	1	1	FALSE	Not DE	T1_V_T0
ENSG00000143621.17	ILF2	1096.54	-0.0753809	0.0398573	0	1	1	FALSE	Not DE	T1_V_T0
ENSG00000143624.14	INTS3	898.301	-0.231025	0.065513	-0.473566	0.635809	1	FALSE	Not DE	T1_V_T0
ENSG00000143554.14	SLC27A3	614.363	-0.164608	0.0715022	0	1	1	FALSE	Not DE	T1_V_T0
ENSG00000143614.11	GATAD2B	266.076	0.324742	0.102804	1.21339	0.224979	1	FALSE	Not DE	T1_V_T0
ENSG00000284738.2	ENSG00000284738	7.36019	-0.394294	0.265199	-0.732634	0.463782	NA	NA	Not DE	T1_V_T0
ENSG00000198837.10	DENND4B	3179.18	-0.0250014	0.0364651	0	1	1	FALSE	Not DE	T1_V_T0
ENSG00000160741.17	CRTC2	2448.45	-0.0547611	0.0434559	0	1	1	FALSE	Not DE	T1_V_T0
ENSG00000143578.16	CREB3L4	76.522	-0.053375	0.0674938	0	1	1	FALSE	Not DE	T1_V_T0
ENSG00000143543.15	JTB	38.5079	-0.0402989	0.179488	0	1	1	FALSE	Not DE	T1_V_T0
ENSG00000272654.2	JTB-DT	13.5997	0.0538125	0.139794	0	1	1	FALSE	Not DE	T1_V_T0
ENSG00000177954.14	RPS27	23623.7	-0.114344	0.0660859	0	1	1	FALSE	Not DE	T1_V_T0
ENSG00000143552.10	NUP210L	19.4962	0.0030582	0.182565	0	1	1	FALSE	Not DE	T1_V_T0
ENSG00000143549.22	TPM3	7426.26	-0.136659	0.0317377	0	1	1	FALSE	Not DE	T1_V_T0
ENSG00000143612.21	C1orf43	1500.39	-0.16345	0.0355638	0	1	1	FALSE	Not DE	T1_V_T0
ENSG00000143569.19	UBAP2L	1231.89	-0.0967689	0.0405787	0	1	1	FALSE	Not DE	T1_V_T0
ENSG00000143575.16	HAX1	942.988	-0.0951558	0.0481369	0	1	1	FALSE	Not DE	T1_V_T0
ENSG00000143595.13	AQP10	132.623	-0.0413718	0.124001	0	1	1	FALSE	Not DE	T1_V_T0
ENSG00000143515.20	ATP8B2	1053.07	0.010924	0.0646047	0	1	1	FALSE	Not DE	T1_V_T0
ENSG00000160712.13	IL6R	5046.07	-0.117894	0.0532855	0	1	1	FALSE	Not DE	T1_V_T0
ENSG00000273110.1	ENSG00000273110	9.13642	-0.251261	0.169921	-0.301674	0.762901	1	FALSE	Not DE	T1_V_T0
ENSG00000160714.10	UBE2Q1	1330.67	-0.108651	0.0326231	0	1	1	FALSE	Not DE	T1_V_T0
ENSG00000160710.18	ADAR	10561.5	-0.216265	0.0577247	-0.281764	0.778125	1	FALSE	Not DE	T1_V_T0
ENSG00000287064.1	ENSG00000287064	7.56128	0.0276424	0.223999	0	1	NA	NA	Not DE	T1_V_T0
ENSG00000143603.19	KCNN3	11.0313	-0.301177	0.227182	-0.445358	0.656061	1	FALSE	Not DE	T1_V_T0
ENSG00000163344.6	PMVK	352.997	-0.148497	0.0692308	0	1	1	FALSE	Not DE	T1_V_T0
ENSG00000163346.17	PBXIP1	6470.17	0.0738935	0.051186	0	1	1	FALSE	Not DE	T1_V_T0
ENSG00000163348.4	PYGO2	906.041	0.0637106	0.0396997	0	1	1	FALSE	Not DE	T1_V_T0
ENSG00000271380.1	ENSG00000271380	14.7392	0.0426467	0.138373	0	1	1	FALSE	Not DE	T1_V_T0
ENSG00000160691.19	SHC1	364.904	-0.166019	0.060448	0	1	1	FALSE	Not DE	T1_V_T0
ENSG00000173207.13	CKS1B	58.4897	-0.105918	0.0829894	0	1	1	FALSE	Not DE	T1_V_T0
ENSG00000160688.19	FLAD1	498.957	-0.0882317	0.0448195	0	1	1	FALSE	Not DE	T1_V_T0
ENSG00000160685.14	ZBTB7B	2790.52	-0.185698	0.0508794	0	1	1	FALSE	Not DE	T1_V_T0
ENSG00000163354.15	DCST2	23.5554	0.178192	0.113086	0	1	1	FALSE	Not DE	T1_V_T0
ENSG00000143537.14	ADAM15	1436.82	-0.0233143	0.0570666	0	1	1	FALSE	Not DE	T1_V_T0
ENSG00000143590.14	EFNA3	17.6288	-0.0640622	0.129572	0	1	1	FALSE	Not DE	T1_V_T0
ENSG00000169242.12	EFNA1	14.7423	0.258173	0.152958	0.380318	0.70371	1	FALSE	Not DE	T1_V_T0
ENSG00000169241.19	SLC50A1	392.541	-0.127873	0.0425425	0	1	1	FALSE	Not DE	T1_V_T0
ENSG00000179085.8	DPM3	190.948	-0.0069779	0.0816092	0	1	1	FALSE	Not DE	T1_V_T0
ENSG00000163462.19	TRIM46	97.9183	0.0283772	0.0762746	0	1	1	FALSE	Not DE	T1_V_T0
ENSG00000185499.17	MUC1	25.2118	-0.687705	0.152493	-3.19821	0.00138283	0.101117	FALSE	Not DE	T1_V_T0
ENSG00000169231.13	THBS3	633.713	-0.00132767	0.0508758	0	1	1	FALSE	Not DE	T1_V_T0
ENSG00000173171.15	MTX1	668.384	-0.188916	0.0721556	0	1	1	FALSE	Not DE	T1_V_T0
ENSG00000236263.1	ENSG00000236263	8.15284	-0.0598861	0.177735	0	1	NA	NA	Not DE	T1_V_T0
ENSG00000177628.16	GBA1	689.287	-0.381681	0.0765569	-2.37315	0.0176373	0.581389	FALSE	Not DE	T1_V_T0
ENSG00000160767.23	ENTREP3	81.0854	-0.287556	0.071419	-1.22595	0.220217	1	FALSE	Not DE	T1_V_T0
ENSG00000116521.11	SCAMP3	424.848	-0.191125	0.0539417	0	1	1	FALSE	Not DE	T1_V_T0
ENSG00000176444.19	CLK2	501.657	-0.0432762	0.0607606	0	1	1	FALSE	Not DE	T1_V_T0
ENSG00000160752.15	FDPS	966.921	-0.0901882	0.0337901	0	1	1	FALSE	Not DE	T1_V_T0
ENSG00000225855.7	RUSC1-AS1	32.5304	-0.0165426	0.0962318	0	1	1	FALSE	Not DE	T1_V_T0
ENSG00000160753.17	RUSC1	222.544	-0.0488247	0.0455062	0	1	1	FALSE	Not DE	T1_V_T0
ENSG00000116539.14	ASH1L	882.204	0.186173	0.0613816	0	1	1	FALSE	Not DE	T1_V_T0
ENSG00000125459.18	MSTO1	193.066	0.018838	0.0443258	0	1	1	FALSE	Not DE	T1_V_T0
ENSG00000246203.2	ENSG00000246203	44.6818	-0.191808	0.0931737	0	1	1	FALSE	Not DE	T1_V_T0
ENSG00000163374.20	YY1AP1	1152.09	0.013614	0.0505736	0	1	1	FALSE	Not DE	T1_V_T0
ENSG00000132676.16	DAP3	926.358	-0.0542341	0.0247348	0	1	1	FALSE	Not DE	T1_V_T0
ENSG00000203761.5	MSTO2P	43.5488	0.229279	0.113817	0.257248	0.796987	1	FALSE	Not DE	T1_V_T0
ENSG00000116580.20	GON4L	711.844	0.0576631	0.0332343	0	1	1	FALSE	Not DE	T1_V_T0
ENSG00000132718.9	SYT11	351.504	-0.0698856	0.0413866	0	1	1	FALSE	Not DE	T1_V_T0
ENSG00000143622.12	RIT1	784.81	-0.12426	0.0519888	0	1	1	FALSE	Not DE	T1_V_T0
ENSG00000132680.11	KHDC4	493.428	0.0616604	0.0580584	0	1	1	FALSE	Not DE	T1_V_T0
ENSG00000116584.22	ARHGEF2	3416.37	-0.0489285	0.0373593	0	1	1	FALSE	Not DE	T1_V_T0
ENSG00000273002.1	ARHGEF2-AS2	78.6571	-0.050072	0.0774834	0	1	1	FALSE	Not DE	T1_V_T0
ENSG00000163479.14	SSR2	3754.54	-0.147848	0.0409337	0	1	1	FALSE	Not DE	T1_V_T0
ENSG00000160803.8	UBQLN4	349.502	-0.0308642	0.0461898	0	1	1	FALSE	Not DE	T1_V_T0
ENSG00000116586.12	LAMTOR2	623.165	-0.156789	0.06634	0	1	1	FALSE	Not DE	T1_V_T0
ENSG00000160789.24	LMNA	512.264	0.0132199	0.0671589	0	1	1	FALSE	Not DE	T1_V_T0
ENSG00000196189.14	SEMA4A	3553.1	-0.189555	0.0694307	0	1	1	FALSE	Not DE	T1_V_T0
ENSG00000160785.14	SLC25A44	1311.05	-0.135612	0.0595292	0	1	1	FALSE	Not DE	T1_V_T0
ENSG00000260238.6	PMF1-BGLAP	70.1207	0.0496363	0.0916379	0	1	1	FALSE	Not DE	T1_V_T0
ENSG00000160781.17	PAQR6	198.589	0.0069542	0.0788706	0	1	1	FALSE	Not DE	T1_V_T0
ENSG00000198952.8	SMG5	1996.51	-0.0253991	0.0422989	0	1	1	FALSE	Not DE	T1_V_T0
ENSG00000163472.19	TMEM79	263.417	-0.168086	0.0515742	0	1	1	FALSE	Not DE	T1_V_T0
ENSG00000198715.13	GLMP	502.583	-0.14154	0.0520336	0	1	1	FALSE	Not DE	T1_V_T0
ENSG00000163468.15	CCT3	1286.53	-0.163842	0.0420271	0	1	1	FALSE	Not DE	T1_V_T0
ENSG00000125462.20	MIR9-1HG	17.3017	-0.111689	0.129562	0	1	1	FALSE	Not DE	T1_V_T0
ENSG00000116604.19	MEF2D	1453.83	0.0157163	0.0358687	0	1	1	FALSE	Not DE	T1_V_T0
ENSG00000187862.13	TTC24	66.4369	0.0318815	0.0930069	0	1	1	FALSE	Not DE	T1_V_T0
ENSG00000163382.13	NAXE	474.241	-0.11966	0.0656423	0	1	1	FALSE	Not DE	T1_V_T0
ENSG00000160818.17	GPATCH4	167.178	-0.0765116	0.0650044	0	1	1	FALSE	Not DE	T1_V_T0
ENSG00000143320.9	CRABP2	25.9555	0.0859075	0.108429	0	1	1	FALSE	Not DE	T1_V_T0
ENSG00000143319.17	ISG20L2	514.158	-0.116579	0.0340672	0	1	1	FALSE	Not DE	T1_V_T0
ENSG00000143303.12	METTL25B	334.592	-0.0770597	0.043163	0	1	1	FALSE	Not DE	T1_V_T0
ENSG00000143314.12	MRPL24	371.029	-0.0821007	0.0660801	0	1	1	FALSE	Not DE	T1_V_T0
ENSG00000143321.19	HDGF	3332.64	0.0337762	0.0646051	0	1	1	FALSE	Not DE	T1_V_T0
ENSG00000143294.15	PRCC	964.252	-0.0858561	0.0351539	0	1	1	FALSE	Not DE	T1_V_T0
ENSG00000027869.12	SH2D2A	699.671	-0.12252	0.0805253	0	1	1	FALSE	Not DE	T1_V_T0
ENSG00000198400.14	NTRK1	29.4147	0.37347	0.118138	1.46836	0.142005	1	FALSE	Not DE	T1_V_T0
ENSG00000187800.14	PEAR1	117.572	-0.140973	0.0824374	0	1	1	FALSE	Not DE	T1_V_T0
ENSG00000132694.19	ARHGEF11	1432.93	-0.173111	0.0591031	0	1	1	FALSE	Not DE	T1_V_T0
ENSG00000117036.12	ETV3	273.27	-0.0407568	0.0523349	0	1	1	FALSE	Not DE	T1_V_T0
ENSG00000290592.1	ENSG00000290592	15.8719	0.445721	0.160475	1.53121	0.125718	1	FALSE	Not DE	T1_V_T0
ENSG00000271736.2	LINC02772	46.6579	0.539339	0.161132	2.10596	0.0352075	0.889958	FALSE	Not DE	T1_V_T0
ENSG00000143297.19	FCRL5	235.926	-0.19427	0.085868	0	1	1	FALSE	Not DE	T1_V_T0
ENSG00000160856.21	FCRL3	595.677	0.0204155	0.0735992	0	1	1	FALSE	Not DE	T1_V_T0
ENSG00000132704.16	FCRL2	288.726	-0.217141	0.0889561	-0.192691	0.847201	1	FALSE	Not DE	T1_V_T0
ENSG00000163534.15	FCRL1	329.068	-0.0685811	0.097661	0	1	1	FALSE	Not DE	T1_V_T0
ENSG00000158473.8	CD1D	810.498	-0.0867436	0.0550734	0	1	1	FALSE	Not DE	T1_V_T0
ENSG00000158477.7	CD1A	27.1269	0.125734	0.114108	0	1	1	FALSE	Not DE	T1_V_T0
ENSG00000158481.13	CD1C	195.089	0.156243	0.0908794	0	1	1	FALSE	Not DE	T1_V_T0
ENSG00000158488.16	CD1E	12.2392	0.243508	0.187155	0.232472	0.816171	1	FALSE	Not DE	T1_V_T0
ENSG00000163554.15	SPTA1	62.4844	0.654132	0.148641	3.05522	0.00224896	0.143654	FALSE	Not DE	T1_V_T0
ENSG00000197403.5	OR6N1	6.93848	0.549395	0.21046	1.66015	0.0968836	NA	NA	Not DE	T1_V_T0
ENSG00000163563.8	MNDA	22400.6	-0.0435638	0.0649775	0	1	1	FALSE	Not DE	T1_V_T0
ENSG00000163564.15	PYHIN1	488.121	0.0997886	0.0657172	0	1	1	FALSE	Not DE	T1_V_T0
ENSG00000163565.20	IFI16	4233.49	-0.327319	0.0761082	-1.67287	0.094353	1	FALSE	Not DE	T1_V_T0
ENSG00000163568.16	AIM2	600.353	-0.679927	0.14945	-3.21129	0.00132139	0.0992268	FALSE	Not DE	T1_V_T0
ENSG00000213088.12	ACKR1	44.5826	0.459512	0.19986	1.29847	0.194126	1	FALSE	Not DE	T1_V_T0
ENSG00000179639.11	FCER1A	516.755	0.196017	0.0995222	0	1	1	FALSE	Not DE	T1_V_T0
ENSG00000158716.9	DUSP23	352.459	0.0564782	0.0694885	0	1	1	FALSE	Not DE	T1_V_T0
ENSG00000181036.14	FCRL6	467.01	0.0349017	0.083067	0	1	1	FALSE	Not DE	T1_V_T0
ENSG00000158714.11	SLAMF8	166.71	-0.865437	0.137693	-4.83275	1.34658e-06	0.000767749	TRUE	DE Down	T1_V_T0
ENSG00000256029.6	ENSG00000256029	6.8989	0.360078	0.244031	0.655973	0.511841	NA	NA	Not DE	T1_V_T0
ENSG00000272668.2	ENSG00000272668	23.6655	0.205805	0.119402	0.0486158	0.961225	1	FALSE	Not DE	T1_V_T0
ENSG00000213085.10	CFAP45	108.546	0.147504	0.0967785	0	1	1	FALSE	Not DE	T1_V_T0
ENSG00000158710.15	TAGLN2	24178.6	-0.116246	0.0542521	0	1	1	FALSE	Not DE	T1_V_T0
ENSG00000162729.14	IGSF8	601.236	-0.0216946	0.0521704	0	1	1	FALSE	Not DE	T1_V_T0
ENSG00000132681.17	ATP1A4	6.23706	0.880695	0.248132	2.74327	0.00608303	NA	NA	Not DE	T1_V_T0
ENSG00000227741.1	ENSG00000227741	11.0912	0.213683	0.164868	0.0829918	0.933858	1	FALSE	Not DE	T1_V_T0
ENSG00000162734.13	PEA15	901.254	-0.217934	0.0503183	-0.356416	0.721529	1	FALSE	Not DE	T1_V_T0
ENSG00000132716.19	DCAF8	547.414	0.19355	0.0535157	0	1	1	FALSE	Not DE	T1_V_T0
ENSG00000258465.8	ENSG00000258465	24.8298	0.125	0.108384	0	1	1	FALSE	Not DE	T1_V_T0
ENSG00000122218.17	COPA	1494.87	-0.104097	0.0353517	0	1	1	FALSE	Not DE	T1_V_T0
ENSG00000162736.18	NCSTN	1666.95	-0.202624	0.0468412	-0.0560291	0.955319	1	FALSE	Not DE	T1_V_T0
ENSG00000171786.6	NHLH1	23.0186	-0.424767	0.124382	-1.80707	0.0707511	1	FALSE	Not DE	T1_V_T0
ENSG00000162739.14	SLAMF6	649.919	0.00073415	0.066774	0	1	1	FALSE	Not DE	T1_V_T0
ENSG00000066294.15	CD84	382.971	-0.0381013	0.0518735	0	1	1	FALSE	Not DE	T1_V_T0
ENSG00000117090.16	SLAMF1	338.821	0.00800348	0.0570587	0	1	1	FALSE	Not DE	T1_V_T0
ENSG00000228863.8	ENSG00000228863	46.7448	-0.900925	0.146801	-4.77467	1.8e-06	0.000893847	TRUE	DE Down	T1_V_T0
ENSG00000117091.10	CD48	4564.55	-0.225256	0.0414276	-0.609636	0.542103	1	FALSE	Not DE	T1_V_T0
ENSG00000026751.17	SLAMF7	987.595	-0.629111	0.0898559	-4.77555	1.79221e-06	0.000893847	TRUE	DE Down	T1_V_T0
ENSG00000122224.18	LY9	589.015	-0.0828697	0.0579976	0	1	1	FALSE	Not DE	T1_V_T0
ENSG00000122223.13	CD244	795.915	0.0151794	0.0488189	0	1	1	FALSE	Not DE	T1_V_T0
ENSG00000179914.5	ITLN1	37.7633	0.434235	0.164195	1.42657	0.153704	1	FALSE	Not DE	T1_V_T0
ENSG00000158769.18	F11R	1216.63	-0.0484187	0.0515972	0	1	1	FALSE	Not DE	T1_V_T0
ENSG00000270149.5	ENSG00000270149	35.5009	0.481117	0.104422	2.69211	0.00710005	0.313175	FALSE	Not DE	T1_V_T0
ENSG00000158773.14	USF1	3578.33	-0.114621	0.0528897	0	1	1	FALSE	Not DE	T1_V_T0
ENSG00000186517.14	ARHGAP30	10225.3	-0.0778581	0.0418063	0	1	1	FALSE	Not DE	T1_V_T0
ENSG00000143256.5	PFDN2	238.204	-0.149993	0.0516418	0	1	1	FALSE	Not DE	T1_V_T0
ENSG00000158793.14	NIT1	598.234	-0.148589	0.0458209	0	1	1	FALSE	Not DE	T1_V_T0
ENSG00000158796.17	DEDD	809.85	-0.104915	0.033752	0	1	1	FALSE	Not DE	T1_V_T0
ENSG00000143222.12	UFC1	927.077	-0.216343	0.0457816	-0.356984	0.721103	1	FALSE	Not DE	T1_V_T0
ENSG00000143258.17	USP21	499.827	-0.0964887	0.0383699	0	1	1	FALSE	Not DE	T1_V_T0
ENSG00000143224.18	PPOX	374.701	0.202101	0.0541883	0.0387659	0.969077	1	FALSE	Not DE	T1_V_T0
ENSG00000158850.15	B4GALT3	834.231	0.0123206	0.0517243	0	1	1	FALSE	Not DE	T1_V_T0
ENSG00000158859.10	ADAMTS4	7.5722	0.071951	0.192876	0	1	NA	NA	Not DE	T1_V_T0
ENSG00000158864.13	NDUFS2	1170.93	-0.093567	0.0313591	0	1	1	FALSE	Not DE	T1_V_T0
ENSG00000158869.11	FCER1G	7874.61	-0.515991	0.0934055	-3.38301	0.000716966	0.0641685	FALSE	Not DE	T1_V_T0
ENSG00000158882.15	TOMM40L	214.706	-0.158872	0.055784	0	1	1	FALSE	Not DE	T1_V_T0
ENSG00000158887.19	MPZ	143.905	-0.25456	0.0811936	-0.671978	0.501598	1	FALSE	Not DE	T1_V_T0
ENSG00000143252.16	SDHC	396.898	-0.120983	0.0590741	0	1	1	FALSE	Not DE	T1_V_T0
ENSG00000289106.2	ENSG00000289106	26.0361	-0.141406	0.1154	0	1	1	FALSE	Not DE	T1_V_T0
ENSG00000288670.1	ENSG00000288670	50.7744	-0.0168071	0.0834206	0	1	1	FALSE	Not DE	T1_V_T0
ENSG00000283696.1	ENSG00000283696	36.3504	-0.312148	0.102093	-1.09849	0.27199	1	FALSE	Not DE	T1_V_T0
ENSG00000143226.16	FCGR2A	2250.64	-0.303695	0.09711	-1.06781	0.285608	1	FALSE	Not DE	T1_V_T0
ENSG00000273112.1	ENSG00000273112	718.395	-0.283047	0.0890988	-0.932083	0.351294	1	FALSE	Not DE	T1_V_T0
ENSG00000203747.13	FCGR3A	6371.92	-0.290085	0.0685465	-1.31422	0.188771	1	FALSE	Not DE	T1_V_T0
ENSG00000289768.1	ENSG00000289768	154.319	-0.367904	0.119186	-1.40875	0.158908	1	FALSE	Not DE	T1_V_T0
ENSG00000244682.8	FCGR2C	140.155	-0.213331	0.101736	-0.131038	0.895745	1	FALSE	Not DE	T1_V_T0
ENSG00000225217.1	HSPA7	1063.07	-0.0516022	0.0772803	0	1	1	FALSE	Not DE	T1_V_T0
ENSG00000072694.22	FCGR2B	623.661	-0.201668	0.0609682	-0.0273586	0.978174	1	FALSE	Not DE	T1_V_T0
ENSG00000132185.18	FCRLA	246.074	-0.238125	0.0887564	-0.429541	0.667529	1	FALSE	Not DE	T1_V_T0
ENSG00000162746.15	FCRLB	21.9124	0.0166672	0.115584	0	1	1	FALSE	Not DE	T1_V_T0
ENSG00000081721.12	DUSP12	200.62	-0.0151731	0.0476306	0	1	1	FALSE	Not DE	T1_V_T0
ENSG00000118217.7	ATF6	1311.11	-0.0498873	0.0699255	0	1	1	FALSE	Not DE	T1_V_T0
ENSG00000162745.11	OLFML2B	21.8229	-0.425433	0.130911	-1.72203	0.0850644	1	FALSE	Not DE	T1_V_T0
ENSG00000198574.6	SH2D1B	192.432	0.0493526	0.103061	0	1	1	FALSE	Not DE	T1_V_T0
ENSG00000152332.16	UHMK1	867.391	0.0824511	0.0598693	0	1	1	FALSE	Not DE	T1_V_T0
ENSG00000117143.14	UAP1	130.342	-0.0582846	0.0596254	0	1	1	FALSE	Not DE	T1_V_T0
ENSG00000132196.16	HSD17B7	149.717	0.0626188	0.0479467	0	1	1	FALSE	Not DE	T1_V_T0
ENSG00000143248.13	RGS5	8.40385	0.387443	0.196253	0.955109	0.339522	1	FALSE	Not DE	T1_V_T0
ENSG00000143228.13	NUF2	14.3857	0.293943	0.140737	0.66751	0.504447	1	FALSE	Not DE	T1_V_T0
ENSG00000185630.20	PBX1	146.388	0.161202	0.0922177	0	1	1	FALSE	Not DE	T1_V_T0
ENSG00000143198.13	MGST3	387.498	-0.126278	0.0444135	0	1	1	FALSE	Not DE	T1_V_T0
ENSG00000143149.13	ALDH9A1	569.558	0.0378305	0.0378334	0	1	1	FALSE	Not DE	T1_V_T0
ENSG00000143183.18	TMCO1	691.36	-0.105588	0.0373107	0	1	1	FALSE	Not DE	T1_V_T0
ENSG00000143179.16	UCK2	119.058	0.178722	0.0540618	0	1	1	FALSE	Not DE	T1_V_T0
ENSG00000234142.2	LINC01675	6.14753	-0.376173	0.219103	-0.804065	0.42136	NA	NA	Not DE	T1_V_T0
ENSG00000143157.12	POGK	435.084	-0.127146	0.0420252	0	1	1	FALSE	Not DE	T1_V_T0
ENSG00000152382.6	TADA1	97.0133	0.109881	0.0692017	0	1	1	FALSE	Not DE	T1_V_T0
ENSG00000225171.2	DUTP6	8.99518	0.411888	0.16342	1.29658	0.194775	1	FALSE	Not DE	T1_V_T0
ENSG00000143167.12	GPA33	80.3272	-0.0455383	0.0964224	0	1	1	FALSE	Not DE	T1_V_T0
ENSG00000143190.23	POU2F1	527.091	0.139932	0.0520142	0	1	1	FALSE	Not DE	T1_V_T0
ENSG00000198821.12	CD247	3383.44	0.080969	0.0579418	0	1	1	FALSE	Not DE	T1_V_T0
ENSG00000143162.9	CREG1	944.692	-0.122246	0.0668622	0	1	1	FALSE	Not DE	T1_V_T0
ENSG00000241666.2	ENSG00000241666	7.20365	-0.314652	0.188679	-0.607657	0.543415	NA	NA	Not DE	T1_V_T0
ENSG00000198771.11	RCSD1	4273.31	0.0469533	0.0250624	0	1	1	FALSE	Not DE	T1_V_T0
ENSG00000197965.12	MPZL1	1513.16	0.160413	0.0606491	0	1	1	FALSE	Not DE	T1_V_T0
ENSG00000143199.18	ADCY10	10.5184	-0.157621	0.176034	0	1	1	FALSE	Not DE	T1_V_T0
ENSG00000143158.11	MPC2	397.67	-0.0420829	0.0443837	0	1	1	FALSE	Not DE	T1_V_T0
ENSG00000143164.16	DCAF6	655.6	0.127711	0.050611	0	1	1	FALSE	Not DE	T1_V_T0
ENSG00000143155.13	TIPRL	389.7	-0.0526578	0.0433744	0	1	1	FALSE	Not DE	T1_V_T0
ENSG00000213064.10	SFT2D2	948.18	-0.0996077	0.0441164	0	1	1	FALSE	Not DE	T1_V_T0
ENSG00000143178.13	TBX19	115.84	-0.0324439	0.0511759	0	1	1	FALSE	Not DE	T1_V_T0
ENSG00000143185.4	XCL2	103.901	-0.0300368	0.0837465	0	1	1	FALSE	Not DE	T1_V_T0
ENSG00000143184.5	XCL1	41.3693	0.0215387	0.107785	0	1	1	FALSE	Not DE	T1_V_T0
ENSG00000143153.14	ATP1B1	36.0167	-0.110585	0.106713	0	1	1	FALSE	Not DE	T1_V_T0
ENSG00000143156.14	NME7	78.0361	-0.0556367	0.0702652	0	1	1	FALSE	Not DE	T1_V_T0
ENSG00000117475.14	BLZF1	176.899	-0.172398	0.0654503	0	1	1	FALSE	Not DE	T1_V_T0
ENSG00000117479.15	SLC19A2	47.6672	0.297615	0.0924117	1.05631	0.290827	1	FALSE	Not DE	T1_V_T0
ENSG00000198734.12	F5	779.59	-0.0454861	0.0836368	0	1	1	FALSE	Not DE	T1_V_T0
ENSG00000174175.17	SELP	287.394	-0.166728	0.0807872	0	1	1	FALSE	Not DE	T1_V_T0
ENSG00000000460.17	C1orf112	168.743	-0.0607452	0.103252	0	1	1	FALSE	Not DE	T1_V_T0
ENSG00000188404.10	SELL	23937.8	-0.365138	0.0701006	-2.35573	0.0184863	0.594848	FALSE	Not DE	T1_V_T0
ENSG00000171806.12	METTL18	95.985	0.0290298	0.0684125	0	1	1	FALSE	Not DE	T1_V_T0
ENSG00000000457.14	SCYL3	290.708	-0.0806644	0.0374995	0	1	1	FALSE	Not DE	T1_V_T0
ENSG00000075945.13	KIFAP3	222.594	0.0421682	0.0483112	0	1	1	FALSE	Not DE	T1_V_T0
ENSG00000120370.14	GORAB	66.3474	0.0525543	0.0832381	0	1	1	FALSE	Not DE	T1_V_T0
ENSG00000231424.3	ENSG00000231424	8.50592	0.455572	0.274865	0.929809	0.35247	1	FALSE	Not DE	T1_V_T0
ENSG00000076258.10	FMO4	35.2841	0.012391	0.0996608	0	1	1	FALSE	Not DE	T1_V_T0
ENSG00000117523.18	PRRC2C	2249.82	0.0432464	0.0439575	0	1	1	FALSE	Not DE	T1_V_T0
ENSG00000233328.3	PFN1P1	34.7258	-0.153325	0.152129	0	1	1	FALSE	Not DE	T1_V_T0
ENSG00000117533.15	VAMP4	294.838	0.0917363	0.0440479	0	1	1	FALSE	Not DE	T1_V_T0
ENSG00000010165.20	METTL13	417.201	-0.132354	0.0406918	0	1	1	FALSE	Not DE	T1_V_T0
ENSG00000197959.15	DNM3	103.597	0.140996	0.0837338	0	1	1	FALSE	Not DE	T1_V_T0
ENSG00000135845.10	PIGC	488.996	0.0434379	0.0522307	0	1	1	FALSE	Not DE	T1_V_T0
ENSG00000094975.14	SUCO	347.255	0.18066	0.0599919	0	1	1	FALSE	Not DE	T1_V_T0
ENSG00000117560.8	FASLG	103.986	0.182963	0.084047	0	1	1	FALSE	Not DE	T1_V_T0
ENSG00000224228.2	ENSG00000224228	6.97615	0.343351	0.230555	0.621765	0.534097	NA	NA	Not DE	T1_V_T0
ENSG00000117586.11	TNFSF4	68.1797	-0.00399542	0.0949259	0	1	1	FALSE	Not DE	T1_V_T0
ENSG00000203739.6	PRDX6-AS1	189.825	0.160023	0.0768814	0	1	1	FALSE	Not DE	T1_V_T0
ENSG00000117592.9	PRDX6	3201.57	0.0705125	0.0728193	0	1	1	FALSE	Not DE	T1_V_T0
ENSG00000076321.11	KLHL20	102.048	0.109094	0.0870935	0	1	1	FALSE	Not DE	T1_V_T0
ENSG00000120334.16	CENPL	24.0861	-0.125525	0.098086	0	1	1	FALSE	Not DE	T1_V_T0
ENSG00000117593.12	DARS2	85.6496	-0.0519179	0.0650507	0	1	1	FALSE	Not DE	T1_V_T0
ENSG00000234741.10	GAS5	1199.74	0.160329	0.0566018	0	1	1	FALSE	Not DE	T1_V_T0
ENSG00000270084.2	GAS5-AS1	9.52409	0.119742	0.149408	0	1	1	FALSE	Not DE	T1_V_T0
ENSG00000185278.16	ZBTB37	414.229	0.100285	0.0457787	0	1	1	FALSE	Not DE	T1_V_T0
ENSG00000135870.12	RC3H1	1113.55	0.0687301	0.0523798	0	1	1	FALSE	Not DE	T1_V_T0
ENSG00000152061.24	RABGAP1L	2107.7	0.189802	0.0611542	0	1	1	FALSE	Not DE	T1_V_T0
ENSG00000116161.18	CACYBP	396.824	-0.179811	0.0487916	0	1	1	FALSE	Not DE	T1_V_T0
ENSG00000120333.4	MRPS14	258.304	-0.00501604	0.0390508	0	1	1	FALSE	Not DE	T1_V_T0
ENSG00000235750.10	KIAA0040	2834.46	-0.295555	0.0626495	-1.52523	0.127201	1	FALSE	Not DE	T1_V_T0
ENSG00000116147.17	TNR	6.78095	0.733647	0.302804	1.76235	0.0780106	NA	NA	Not DE	T1_V_T0
ENSG00000227740.2	LINC02803	28.9161	0.0809658	0.116804	0	1	1	FALSE	Not DE	T1_V_T0
ENSG00000143207.21	COP1	2701.6	0.109461	0.0657315	0	1	1	FALSE	Not DE	T1_V_T0
ENSG00000236021.4	COP1-DT	50.5487	0.0481824	0.0917104	0	1	1	FALSE	Not DE	T1_V_T0
ENSG00000075391.18	RASAL2	14.1829	0.137072	0.164556	0	1	1	FALSE	Not DE	T1_V_T0
ENSG00000116191.19	RALGPS2	519.275	0.0544314	0.0656671	0	1	1	FALSE	Not DE	T1_V_T0
ENSG00000116199.12	FAM20B	364.402	-0.0217713	0.0518144	0	1	1	FALSE	Not DE	T1_V_T0
ENSG00000186283.14	TOR3A	601.106	-0.15354	0.0439267	0	1	1	FALSE	Not DE	T1_V_T0
ENSG00000143322.22	ABL2	214.645	-0.0251221	0.0595291	0	1	1	FALSE	Not DE	T1_V_T0
ENSG00000057252.13	SOAT1	654.425	-0.0769993	0.0447124	0	1	1	FALSE	Not DE	T1_V_T0
ENSG00000231966.1	LINC02818	14.8186	-0.237619	0.149866	-0.251017	0.801801	1	FALSE	Not DE	T1_V_T0
ENSG00000169905.13	TOR1AIP2	709.012	-0.0721086	0.0394219	0	1	1	FALSE	Not DE	T1_V_T0
ENSG00000272906.1	ENSG00000272906	38.2636	0.0112775	0.0871453	0	1	1	FALSE	Not DE	T1_V_T0
ENSG00000143337.19	TOR1AIP1	747.186	-0.0683841	0.0557166	0	1	1	FALSE	Not DE	T1_V_T0
ENSG00000135837.17	CEP350	652.085	0.136526	0.0513743	0	1	1	FALSE	Not DE	T1_V_T0
ENSG00000116260.17	QSOX1	1827.8	0.00592877	0.0627242	0	1	1	FALSE	Not DE	T1_V_T0
ENSG00000230124.8	ACBD6	382.304	0.172411	0.0437497	0	1	1	FALSE	Not DE	T1_V_T0
ENSG00000143324.14	XPR1	297.24	0.129814	0.0656049	0	1	1	FALSE	Not DE	T1_V_T0
ENSG00000243155.1	ENSG00000243155	76.2843	-0.0535764	0.0781566	0	1	1	FALSE	Not DE	T1_V_T0
ENSG00000135823.14	STX6	157.529	-0.00292055	0.0708295	0	1	1	FALSE	Not DE	T1_V_T0
ENSG00000153029.16	MR1	616.652	-0.305608	0.0544365	-1.94002	0.0523768	1	FALSE	Not DE	T1_V_T0
ENSG00000162783.11	IER5	798.17	-0.14365	0.0489938	0	1	1	FALSE	Not DE	T1_V_T0
ENSG00000198216.14	CACNA1E	380.776	-0.346996	0.134935	-1.08938	0.275985	1	FALSE	Not DE	T1_V_T0
ENSG00000231684.3	EIF1P3	11.0038	-0.0274287	0.166577	0	1	1	FALSE	Not DE	T1_V_T0
ENSG00000135821.19	GLUL	8599.86	-0.00154608	0.0563928	0	1	1	FALSE	Not DE	T1_V_T0
ENSG00000135828.11	RNASEL	726.076	-0.16942	0.0614009	0	1	1	FALSE	Not DE	T1_V_T0
ENSG00000143333.7	RGS16	7.53974	0.107911	0.203631	0	1	NA	NA	Not DE	T1_V_T0
ENSG00000135838.14	NPL	1937.58	0.220138	0.063145	0.318912	0.749793	1	FALSE	Not DE	T1_V_T0
ENSG00000135829.17	DHX9	1150.57	0.006291	0.0463604	0	1	1	FALSE	Not DE	T1_V_T0
ENSG00000135862.6	LAMC1	51.2751	-0.253384	0.098396	-0.542547	0.587442	1	FALSE	Not DE	T1_V_T0
ENSG00000116698.22	SMG7	1383.49	-0.0393422	0.0365534	0	1	1	FALSE	Not DE	T1_V_T0
ENSG00000116701.16	NCF2	16488.1	-0.104833	0.0545112	0	1	1	FALSE	Not DE	T1_V_T0
ENSG00000162704.16	ARPC5	6476.06	-0.0585342	0.050188	0	1	1	FALSE	Not DE	T1_V_T0
ENSG00000143344.16	RGL1	56.6469	0.0660817	0.106506	0	1	1	FALSE	Not DE	T1_V_T0
ENSG00000198756.12	COLGALT2	43.4019	0.192807	0.109149	0	1	1	FALSE	Not DE	T1_V_T0
ENSG00000198860.14	TSEN15	224.889	0.00520932	0.0588857	0	1	1	FALSE	Not DE	T1_V_T0
ENSG00000116667.15	C1orf21	237.969	0.0867305	0.0807228	0	1	1	FALSE	Not DE	T1_V_T0
ENSG00000116406.20	EDEM3	473.872	0.112568	0.0700776	0	1	1	FALSE	Not DE	T1_V_T0
ENSG00000135842.17	NIBAN1	5816.88	-0.058258	0.0886489	0	1	1	FALSE	Not DE	T1_V_T0
ENSG00000121481.11	RNF2	202.283	-0.0430428	0.0612406	0	1	1	FALSE	Not DE	T1_V_T0
ENSG00000121486.12	TRMT1L	289.533	-0.101005	0.0514642	0	1	1	FALSE	Not DE	T1_V_T0
ENSG00000116668.13	SWT1	138.746	0.134794	0.0756368	0	1	1	FALSE	Not DE	T1_V_T0
ENSG00000279838.1	ENSG00000279838	10.3383	-0.0223719	0.162877	0	1	1	FALSE	Not DE	T1_V_T0
ENSG00000116679.16	IVNS1ABP	2639.66	0.00601125	0.0489071	0	1	1	FALSE	Not DE	T1_V_T0
ENSG00000047410.14	TPR	1522.04	-0.00736162	0.0455794	0	1	1	FALSE	Not DE	T1_V_T0
ENSG00000157181.16	ODR4	158.733	0.00419588	0.0543346	0	1	1	FALSE	Not DE	T1_V_T0
ENSG00000229739.4	PDC-AS1	26.3205	0.260995	0.118922	0.512893	0.608026	1	FALSE	Not DE	T1_V_T0
ENSG00000073756.13	PTGS2	254.934	0.0872128	0.0893268	0	1	1	FALSE	Not DE	T1_V_T0
ENSG00000273129.3	PACERR	11.2441	0.104393	0.148064	0	1	1	FALSE	Not DE	T1_V_T0
ENSG00000116711.10	PLA2G4A	104.705	0.116523	0.070532	0	1	1	FALSE	Not DE	T1_V_T0
ENSG00000230426.5	LINC01036	29.9217	0.411738	0.170344	1.243	0.213868	1	FALSE	Not DE	T1_V_T0
ENSG00000150681.10	RGS18	1420.1	0.122667	0.0629925	0	1	1	FALSE	Not DE	T1_V_T0
ENSG00000285280.2	ENSG00000285280	171.861	0.119734	0.182719	0	1	1	FALSE	Not DE	T1_V_T0
ENSG00000090104.12	RGS1	24.3358	-0.0288066	0.137499	0	1	1	FALSE	Not DE	T1_V_T0
ENSG00000231767.5	RPS27AP5	38.8502	-0.125501	0.136922	0	1	1	FALSE	Not DE	T1_V_T0
ENSG00000116741.8	RGS2	18274.3	0.0585909	0.0695453	0	1	1	FALSE	Not DE	T1_V_T0
ENSG00000116750.14	UCHL5	178.506	-0.0473946	0.0549927	0	1	1	FALSE	Not DE	T1_V_T0
ENSG00000116747.13	RO60	436.886	0.0133649	0.0502681	0	1	1	FALSE	Not DE	T1_V_T0
ENSG00000023572.10	GLRX2	87.7983	-0.0232564	0.0587584	0	1	1	FALSE	Not DE	T1_V_T0
ENSG00000134371.14	CDC73	366.95	0.0567366	0.065356	0	1	1	FALSE	Not DE	T1_V_T0
ENSG00000162630.6	B3GALT2	14.6507	-0.156993	0.155197	0	1	1	FALSE	Not DE	T1_V_T0
ENSG00000227240.2	ENSG00000227240	88.376	0.305872	0.116433	0.909296	0.363194	1	FALSE	Not DE	T1_V_T0
ENSG00000066279.19	ASPM	17.6652	0.458331	0.150503	1.71645	0.0860806	1	FALSE	Not DE	T1_V_T0
ENSG00000177888.8	ZBTB41	79.8544	0.0854191	0.0919066	0	1	1	FALSE	Not DE	T1_V_T0
ENSG00000213047.13	DENND1B	285.159	0.0289145	0.0718836	0	1	1	FALSE	Not DE	T1_V_T0
ENSG00000151414.15	NEK7	751.656	0.225495	0.0832025	0.306425	0.759281	1	FALSE	Not DE	T1_V_T0
ENSG00000081237.21	PTPRC	9042.31	-0.0837662	0.080548	0	1	1	FALSE	Not DE	T1_V_T0
ENSG00000229989.6	MIR181A1HG	68.3374	0.31046	0.129773	0.851179	0.39467	1	FALSE	Not DE	T1_V_T0
ENSG00000203721.8	LINC00862	189.947	0.213281	0.102263	0.129867	0.896672	1	FALSE	Not DE	T1_V_T0
ENSG00000162702.8	ZNF281	249.323	0.0571775	0.0675646	0	1	1	FALSE	Not DE	T1_V_T0
ENSG00000118193.12	KIF14	9.80912	0.597462	0.223818	1.77583	0.0757612	1	FALSE	Not DE	T1_V_T0
ENSG00000118197.14	DDX59	279.065	-0.0203311	0.0458313	0	1	1	FALSE	Not DE	T1_V_T0
ENSG00000118200.15	CAMSAP2	32.1818	0.0955044	0.109628	0	1	1	FALSE	Not DE	T1_V_T0
ENSG00000170128.5	GPR25	24.4814	0.174357	0.155377	0	1	1	FALSE	Not DE	T1_V_T0
ENSG00000116852.15	KIF21B	2088.45	0.113355	0.0399158	0	1	1	FALSE	Not DE	T1_V_T0
ENSG00000229191.1	ENSG00000229191	7.45217	0.00142707	0.197577	0	1	NA	NA	Not DE	T1_V_T0
ENSG00000116857.17	TMEM9	254.658	0.000665202	0.0550514	0	1	1	FALSE	Not DE	T1_V_T0
ENSG00000174307.7	PHLDA3	12.496	0.160267	0.1687	0	1	1	FALSE	Not DE	T1_V_T0
ENSG00000159176.14	CSRP1	766.79	-0.115034	0.0452952	0	1	1	FALSE	Not DE	T1_V_T0
ENSG00000224536.2	CSRP1-AS1	14.7936	0.262766	0.14272	0.439783	0.660094	1	FALSE	Not DE	T1_V_T0
ENSG00000134369.16	NAV1	77.8451	0.103251	0.0837252	0	1	1	FALSE	Not DE	T1_V_T0
ENSG00000198700.10	IPO9	453.577	-0.00487929	0.0384117	0	1	1	FALSE	Not DE	T1_V_T0
ENSG00000198892.7	SHISA4	293.381	0.724864	0.128702	4.07814	4.53971e-05	0.00873554	TRUE	DE Up	T1_V_T0
ENSG00000134375.11	TIMM17A	363.223	-0.0387758	0.0447712	0	1	1	FALSE	Not DE	T1_V_T0
ENSG00000176393.11	RNPEP	1775.67	-0.0861186	0.0337813	0	1	1	FALSE	Not DE	T1_V_T0
ENSG00000143862.8	ARL8A	951.531	-0.216279	0.0548958	-0.296539	0.766819	1	FALSE	Not DE	T1_V_T0
ENSG00000143851.16	PTPN7	1144.4	0.0754902	0.0502039	0	1	1	FALSE	Not DE	T1_V_T0
ENSG00000243323.7	PTPRVP	15.7894	0.424917	0.132292	1.70015	0.089102	1	FALSE	Not DE	T1_V_T0
ENSG00000133067.18	LGR6	201.793	0.0993738	0.0816058	0	1	1	FALSE	Not DE	T1_V_T0
ENSG00000077152.12	UBE2T	24.7842	0.0387481	0.104386	0	1	1	FALSE	Not DE	T1_V_T0
ENSG00000077157.23	PPP1R12B	1291.21	0.319722	0.068638	1.74426	0.081114	1	FALSE	Not DE	T1_V_T0
ENSG00000236439.4	ENSG00000236439	60.7997	-0.153119	0.158734	0	1	1	FALSE	Not DE	T1_V_T0
ENSG00000226862.1	ENSG00000226862	58.2958	0.133394	0.102418	0	1	1	FALSE	Not DE	T1_V_T0
ENSG00000117139.18	KDM5B	485.551	0.104026	0.0388945	0	1	1	FALSE	Not DE	T1_V_T0
ENSG00000183155.5	RABIF	246.616	-0.0088893	0.0392374	0	1	1	FALSE	Not DE	T1_V_T0
ENSG00000117153.16	KLHL12	447.608	-0.112465	0.0445088	0	1	1	FALSE	Not DE	T1_V_T0
ENSG00000159346.13	ADIPOR1	8288.3	0.186713	0.0875387	0	1	1	FALSE	Not DE	T1_V_T0
ENSG00000159348.13	CYB5R1	697.291	-0.00369364	0.0469855	0	1	1	FALSE	Not DE	T1_V_T0
ENSG00000163444.12	TMEM183A	638.446	-0.0062965	0.0318086	0	1	1	FALSE	Not DE	T1_V_T0
ENSG00000143847.16	PPFIA4	42.2541	0.445721	0.118468	2.07416	0.0380647	0.934559	FALSE	Not DE	T1_V_T0
ENSG00000163485.17	ADORA1	6.41553	0.418828	0.266112	0.822316	0.410897	NA	NA	Not DE	T1_V_T0
ENSG00000133055.10	MYBPH	70.5748	0.515829	0.128896	2.45026	0.0142755	0.494947	FALSE	Not DE	T1_V_T0
ENSG00000133048.13	CHI3L1	3118.01	0.604009	0.0933791	4.32654	1.51467e-05	0.00423944	TRUE	DE Up	T1_V_T0
ENSG00000133063.16	CHIT1	96.012	0.5485	0.149304	2.33417	0.0195868	0.615344	FALSE	Not DE	T1_V_T0
ENSG00000231507.4	LINC01353	18.2222	-0.164497	0.137596	0	1	1	FALSE	Not DE	T1_V_T0
ENSG00000233791.7	BTG2-DT	19.7514	-0.168907	0.139792	0	1	1	FALSE	Not DE	T1_V_T0
ENSG00000159388.6	BTG2	2697.28	-0.0659273	0.0453697	0	1	1	FALSE	Not DE	T1_V_T0
ENSG00000058668.16	ATP2B4	1597.55	0.0216409	0.0398796	0	1	1	FALSE	Not DE	T1_V_T0
ENSG00000122188.13	LAX1	117.379	0.125372	0.0761409	0	1	1	FALSE	Not DE	T1_V_T0
ENSG00000058673.17	ZC3H11A	7.17976	0.0131819	0.193736	0	1	NA	NA	Not DE	T1_V_T0
ENSG00000182004.13	SNRPE	381.986	0.0076451	0.0588473	0	1	1	FALSE	Not DE	T1_V_T0
ENSG00000143842.15	SOX13	123.871	0.198364	0.0804451	0	1	1	FALSE	Not DE	T1_V_T0
ENSG00000143845.15	ETNK2	11.3205	0.257817	0.167671	0.344821	0.730229	1	FALSE	Not DE	T1_V_T0
ENSG00000143850.16	PLEKHA6	12.8179	0.0500176	0.164803	0	1	1	FALSE	Not DE	T1_V_T0
ENSG00000226330.1	PPP1R15B-AS1	10.5504	0.126051	0.169124	0	1	1	FALSE	Not DE	T1_V_T0
ENSG00000158615.10	PPP1R15B	806.115	-0.0687988	0.0499312	0	1	1	FALSE	Not DE	T1_V_T0
ENSG00000133056.14	PIK3C2B	272.534	0.0116721	0.0714864	0	1	1	FALSE	Not DE	T1_V_T0
ENSG00000198625.14	MDM4	1075.51	0.110964	0.0411088	0	1	1	FALSE	Not DE	T1_V_T0
ENSG00000240710.1	ENSG00000240710	36.9787	0.0470795	0.117832	0	1	1	FALSE	Not DE	T1_V_T0
ENSG00000240219.1	ENSG00000240219	123.572	-0.167627	0.0786923	0	1	1	FALSE	Not DE	T1_V_T0
ENSG00000174529.7	TMEM81	89.855	-0.0451049	0.0689988	0	1	1	FALSE	Not DE	T1_V_T0
ENSG00000117222.14	RBBP5	285.06	-0.0775197	0.0423624	0	1	1	FALSE	Not DE	T1_V_T0
ENSG00000133059.17	DSTYK	259.388	0.126846	0.0445945	0	1	1	FALSE	Not DE	T1_V_T0
ENSG00000133069.17	TMCC2	598.848	0.376458	0.123817	1.42515	0.154114	1	FALSE	Not DE	T1_V_T0
ENSG00000163545.11	NUAK2	1929.74	-0.0571652	0.049073	0	1	1	FALSE	Not DE	T1_V_T0
ENSG00000162873.15	KLHDC8A	22.9782	0.452505	0.159451	1.58359	0.113287	1	FALSE	Not DE	T1_V_T0
ENSG00000235363.1	SNRPGP10	20.1129	-0.0351465	0.140288	0	1	1	FALSE	Not DE	T1_V_T0
ENSG00000117266.16	CDK18	66.5805	-0.346624	0.088552	-1.6558	0.0977633	1	FALSE	Not DE	T1_V_T0
ENSG00000174514.13	MFSD4A	7.64425	0.191165	0.204563	0	1	NA	NA	Not DE	T1_V_T0
ENSG00000158711.14	ELK4	527.112	0.0104833	0.0508851	0	1	1	FALSE	Not DE	T1_V_T0
ENSG00000158715.6	SLC45A3	192.028	0.138106	0.0782846	0	1	1	FALSE	Not DE	T1_V_T0
ENSG00000069275.13	NUCKS1	807.751	0.0384382	0.0446283	0	1	1	FALSE	Not DE	T1_V_T0
ENSG00000117280.13	RAB29	601.34	-0.0653504	0.0407836	0	1	1	FALSE	Not DE	T1_V_T0
ENSG00000133065.11	SLC41A1	141.949	-0.00239266	0.0771127	0	1	1	FALSE	Not DE	T1_V_T0
ENSG00000286619.1	ENSG00000286619	14.6732	-0.123308	0.183158	0	1	1	FALSE	Not DE	T1_V_T0
ENSG00000162877.13	PM20D1	9.70958	0.222926	0.188162	0.121843	0.903023	1	FALSE	Not DE	T1_V_T0
ENSG00000196188.12	CTSE	17.9816	0.612293	0.18768	2.19679	0.0280351	0.77197	FALSE	Not DE	T1_V_T0
ENSG00000285417.1	ENSG00000285417	19.9092	0.260369	0.148217	0.407303	0.683785	1	FALSE	Not DE	T1_V_T0
ENSG00000263961.8	RHEX	60.199	0.23015	0.0920952	0.327375	0.743385	1	FALSE	Not DE	T1_V_T0
ENSG00000196550.11	FAM72A	7.92285	-0.0176608	0.203193	0	1	NA	NA	Not DE	T1_V_T0
ENSG00000266028.8	SRGAP2	907.51	-0.0798399	0.0602722	0	1	1	FALSE	Not DE	T1_V_T0
ENSG00000263528.8	IKBKE	851.849	-0.0469917	0.0459106	0	1	1	FALSE	Not DE	T1_V_T0
ENSG00000261000.1	ENSG00000261000	12.8147	0.059256	0.159826	0	1	1	FALSE	Not DE	T1_V_T0
ENSG00000266094.8	RASSF5	3761.62	-0.0463348	0.0375212	0	1	1	FALSE	Not DE	T1_V_T0
ENSG00000143486.16	EIF2D	456.535	-0.0492466	0.0395551	0	1	1	FALSE	Not DE	T1_V_T0
ENSG00000143479.18	DYRK3	24.7746	0.175295	0.166537	0	1	1	FALSE	Not DE	T1_V_T0
ENSG00000162889.11	MAPKAPK2	2829.76	-0.0144332	0.0497321	0	1	1	FALSE	Not DE	T1_V_T0
ENSG00000224114.1	ENSG00000224114	64.0745	-0.166851	0.129168	0	1	1	FALSE	Not DE	T1_V_T0
ENSG00000142224.18	IL19	6.75952	0.500659	0.245111	1.22662	0.219965	NA	NA	Not DE	T1_V_T0
ENSG00000162894.12	FCMR	2463.53	-0.103371	0.0717039	0	1	1	FALSE	Not DE	T1_V_T0
ENSG00000182795.13	C1orf116	26.2412	0.170203	0.139	0	1	1	FALSE	Not DE	T1_V_T0
ENSG00000123836.15	PFKFB2	206.741	0.108213	0.0760897	0	1	1	FALSE	Not DE	T1_V_T0
ENSG00000180667.11	YOD1	581.441	0.26004	0.118126	0.508272	0.611262	1	FALSE	Not DE	T1_V_T0
ENSG00000123838.11	C4BPA	136.559	-0.101709	0.152237	0	1	1	FALSE	Not DE	T1_V_T0
ENSG00000196352.18	CD55	2709.64	-0.157801	0.0707075	0	1	1	FALSE	Not DE	T1_V_T0
ENSG00000117322.19	CR2	69.3376	0.0562851	0.11052	0	1	1	FALSE	Not DE	T1_V_T0
ENSG00000203710.12	CR1	2280.12	-0.124996	0.0967583	0	1	1	FALSE	Not DE	T1_V_T0
ENSG00000197721.17	CR1L	42.1009	0.301123	0.129533	0.780679	0.434991	1	FALSE	Not DE	T1_V_T0
ENSG00000117335.21	CD46	3566.63	0.0430535	0.0779821	0	1	1	FALSE	Not DE	T1_V_T0
ENSG00000203709.13	MIR29B2CHG	1232.83	0.244353	0.0633527	0.700099	0.483865	1	FALSE	Not DE	T1_V_T0
ENSG00000174059.17	CD34	10.8195	0.192899	0.178043	0	1	1	FALSE	Not DE	T1_V_T0
ENSG00000076356.7	PLXNA2	142.695	0.442505	0.0706699	3.43153	0.000600197	0.0566837	FALSE	Not DE	T1_V_T0
ENSG00000196878.15	LAMB3	12.7735	-0.0556004	0.139781	0	1	1	FALSE	Not DE	T1_V_T0
ENSG00000227591.6	HSD11B1-AS1	26.9982	0.0547067	0.110948	0	1	1	FALSE	Not DE	T1_V_T0
ENSG00000123689.6	G0S2	71.4268	-0.856751	0.181613	-3.61621	0.000298944	0.0340884	TRUE	DE Down	T1_V_T0
ENSG00000009790.15	TRAF3IP3	3949.5	9.61263e-05	0.0345685	0	1	1	FALSE	Not DE	T1_V_T0
ENSG00000117597.18	UTP25	149.552	-0.101003	0.0658006	0	1	1	FALSE	Not DE	T1_V_T0
ENSG00000054392.13	HHAT	59.0236	0.279219	0.108338	0.731219	0.464646	1	FALSE	Not DE	T1_V_T0
ENSG00000234004.4	ENSG00000234004	13.0814	-0.161007	0.215376	0	1	1	FALSE	Not DE	T1_V_T0
ENSG00000117625.14	RCOR3	590.2	0.166115	0.0433043	0	1	1	FALSE	Not DE	T1_V_T0
ENSG00000082512.15	TRAF5	468.809	0.102382	0.0575433	0	1	1	FALSE	Not DE	T1_V_T0
ENSG00000153363.15	LINC00467	43.6072	0.0728889	0.0782859	0	1	1	FALSE	Not DE	T1_V_T0
ENSG00000170385.10	SLC30A1	231.331	-0.180878	0.0693656	0	1	1	FALSE	Not DE	T1_V_T0
ENSG00000123684.13	LPGAT1	1841.61	0.0293042	0.0508612	0	1	1	FALSE	Not DE	T1_V_T0
ENSG00000143493.13	INTS7	152.323	-0.0785445	0.0526856	0	1	1	FALSE	Not DE	T1_V_T0
ENSG00000143476.18	DTL	13.2661	0.325742	0.172268	0.729916	0.465441	1	FALSE	Not DE	T1_V_T0
ENSG00000220749.4	RPL21P28	96.0435	0.034528	0.110636	0	1	1	FALSE	Not DE	T1_V_T0
ENSG00000226251.8	LINC02608	23.9684	0.157849	0.107211	0	1	1	FALSE	Not DE	T1_V_T0
ENSG00000066027.12	PPP2R5A	1606.72	0.0459484	0.0423516	0	1	1	FALSE	Not DE	T1_V_T0
ENSG00000234915.1	ENSG00000234915	8.81168	0.29506	0.173982	0.54638	0.584805	1	FALSE	Not DE	T1_V_T0
ENSG00000065600.13	PACC1	120.896	0.0523453	0.0586375	0	1	1	FALSE	Not DE	T1_V_T0
ENSG00000287445.1	ENSG00000287445	7.8562	-0.248861	0.211812	-0.230681	0.817563	NA	NA	Not DE	T1_V_T0
ENSG00000117691.10	NENF	334.692	-0.104621	0.0722986	0	1	1	FALSE	Not DE	T1_V_T0
ENSG00000260805.3	ENSG00000260805	17.8747	-0.319876	0.117706	-1.01844	0.308471	1	FALSE	Not DE	T1_V_T0
ENSG00000162772.17	ATF3	107.212	-1.00106	0.160921	-4.978	6.42459e-07	0.000449546	TRUE	DE Down	T1_V_T0
ENSG00000123685.9	BATF3	83.9285	-0.360341	0.100738	-1.59166	0.111461	1	FALSE	Not DE	T1_V_T0
ENSG00000117697.15	NSL1	406.3	-0.0103645	0.0414043	0	1	1	FALSE	Not DE	T1_V_T0
ENSG00000203705.11	TATDN3	250.955	-0.0927675	0.039575	0	1	1	FALSE	Not DE	T1_V_T0
ENSG00000198468.11	FLVCR1-DT	60.9811	-0.0697123	0.077204	0	1	1	FALSE	Not DE	T1_V_T0
ENSG00000162769.13	FLVCR1	194.744	0.185582	0.0586105	0	1	1	FALSE	Not DE	T1_V_T0
ENSG00000174606.14	ANGEL2	308.594	0.113976	0.042094	0	1	1	FALSE	Not DE	T1_V_T0
ENSG00000136643.12	RPS6KC1	283.157	-0.0247654	0.0656885	0	1	1	FALSE	Not DE	T1_V_T0
ENSG00000143499.14	SMYD2	274.297	-0.0489331	0.0438335	0	1	1	FALSE	Not DE	T1_V_T0
ENSG00000117724.15	CENPF	28.8134	0.279266	0.132615	0.597713	0.550031	1	FALSE	Not DE	T1_V_T0
ENSG00000136636.13	KCTD3	38.6854	0.152306	0.0912323	0	1	1	FALSE	Not DE	T1_V_T0
ENSG00000092978.11	GPATCH2	133.556	0.162305	0.0677095	0	1	1	FALSE	Not DE	T1_V_T0
ENSG00000067533.6	RRP15	94.7907	-0.0246468	0.0707914	0	1	1	FALSE	Not DE	T1_V_T0
ENSG00000228063.4	LYPLAL1-DT	32.2993	-0.0854391	0.110702	0	1	1	FALSE	Not DE	T1_V_T0
ENSG00000143353.12	LYPLAL1	256.616	0.152592	0.0493097	0	1	1	FALSE	Not DE	T1_V_T0
ENSG00000136628.18	EPRS1	609.606	-0.0678279	0.0448267	0	1	1	FALSE	Not DE	T1_V_T0
ENSG00000162813.18	BPNT1	128.725	0.0258128	0.0511995	0	1	1	FALSE	Not DE	T1_V_T0
ENSG00000067704.10	IARS2	340.922	-0.0349187	0.0609603	0	1	1	FALSE	Not DE	T1_V_T0
ENSG00000118873.17	RAB3GAP2	320.934	0.0574456	0.0566968	0	1	1	FALSE	Not DE	T1_V_T0
ENSG00000218283.2	MORF4L1P1	58.6295	-0.101592	0.0775894	0	1	1	FALSE	Not DE	T1_V_T0
ENSG00000162817.7	C1orf115	33.6946	-0.159917	0.0985883	0	1	1	FALSE	Not DE	T1_V_T0
ENSG00000117791.16	MTARC2	10.2444	0.218343	0.168254	0.109017	0.913189	1	FALSE	Not DE	T1_V_T0
ENSG00000286231.1	ENSG00000286231	19.6643	0.449075	0.140895	1.7678	0.0770941	1	FALSE	Not DE	T1_V_T0
ENSG00000257551.1	HLX-AS1	14.0652	-0.0760577	0.148709	0	1	1	FALSE	Not DE	T1_V_T0
ENSG00000136630.13	HLX	417.024	-0.0360114	0.102207	0	1	1	FALSE	Not DE	T1_V_T0
ENSG00000143507.18	DUSP10	100.257	-0.0864485	0.0605618	0	1	1	FALSE	Not DE	T1_V_T0
ENSG00000227925.2	LINC01655	10.3443	0.309857	0.178763	0.614541	0.538858	1	FALSE	Not DE	T1_V_T0
ENSG00000238042.5	LINC02257	10.7853	0.35373	0.186589	0.823894	0.41	1	FALSE	Not DE	T1_V_T0
ENSG00000143498.18	TAF1A	37.3512	-0.144726	0.0994632	0	1	1	FALSE	Not DE	T1_V_T0
ENSG00000154305.18	MIA3	974.54	-0.215346	0.046225	-0.331989	0.739897	1	FALSE	Not DE	T1_V_T0
ENSG00000272750.1	ENSG00000272750	18.3736	-0.0115279	0.123312	0	1	1	FALSE	Not DE	T1_V_T0
ENSG00000186063.13	AIDA	190.075	-0.138984	0.0765117	0	1	1	FALSE	Not DE	T1_V_T0
ENSG00000162819.12	BROX	698.272	-0.0486003	0.0531771	0	1	1	FALSE	Not DE	T1_V_T0
ENSG00000197520.11	FAM177B	28.0244	-0.157292	0.125177	0	1	1	FALSE	Not DE	T1_V_T0
ENSG00000154309.9	DISP1	121.792	0.121795	0.0697955	0	1	1	FALSE	Not DE	T1_V_T0
ENSG00000187554.14	TLR5	634.485	-0.44106	0.114003	-2.1145	0.0344728	0.881663	FALSE	Not DE	T1_V_T0
ENSG00000143502.16	SUSD4	68.8457	-0.0241853	0.085757	0	1	1	FALSE	Not DE	T1_V_T0
ENSG00000203697.12	CAPN8	8.20579	0.500316	0.207038	1.45053	0.146911	NA	NA	Not DE	T1_V_T0
ENSG00000162909.18	CAPN2	1963.15	-0.0812122	0.037916	0	1	1	FALSE	Not DE	T1_V_T0
ENSG00000143514.18	TP53BP2	319.899	0.0729701	0.0448153	0	1	1	FALSE	Not DE	T1_V_T0
ENSG00000291068.1	ENSG00000291068	165.304	-0.00145952	0.0669463	0	1	1	FALSE	Not DE	T1_V_T0
ENSG00000290989.1	ENSG00000290989	60.264	0.202613	0.0768509	0.0339979	0.972879	1	FALSE	Not DE	T1_V_T0
ENSG00000143756.12	FBXO28	314.239	0.0504875	0.0445925	0	1	1	FALSE	Not DE	T1_V_T0
ENSG00000143753.13	DEGS1	487.878	-0.174685	0.0558808	0	1	1	FALSE	Not DE	T1_V_T0
ENSG00000237101.1	ENSG00000237101	6.59335	-0.310957	0.211697	-0.52413	0.600188	NA	NA	Not DE	T1_V_T0
ENSG00000143748.18	NVL	243.444	0.0825397	0.0467023	0	1	1	FALSE	Not DE	T1_V_T0
ENSG00000143771.12	CNIH4	669.422	-0.253901	0.0703658	-0.766019	0.443665	1	FALSE	Not DE	T1_V_T0
ENSG00000162923.18	WDR26	2432.65	0.144137	0.0511851	0	1	1	FALSE	Not DE	T1_V_T0
ENSG00000143786.8	CNIH3	230.277	0.198799	0.0625193	0	1	1	FALSE	Not DE	T1_V_T0
ENSG00000143815.15	LBR	2387.16	0.0344182	0.0642085	0	1	1	FALSE	Not DE	T1_V_T0
ENSG00000282418.1	ENSG00000282418	6.61029	-0.00537555	0.207907	0	1	NA	NA	Not DE	T1_V_T0
ENSG00000143742.14	SRP9	1080.34	0.0268854	0.050739	0	1	1	FALSE	Not DE	T1_V_T0
ENSG00000143819.13	EPHX1	99.5501	-0.00567526	0.0856795	0	1	1	FALSE	Not DE	T1_V_T0
ENSG00000242861.1	ENSG00000242861	527.426	0.151665	0.0592584	0	1	1	FALSE	Not DE	T1_V_T0
ENSG00000196187.12	TMEM63A	1541.89	-0.00351297	0.0432761	0	1	1	FALSE	Not DE	T1_V_T0
ENSG00000243709.1	LEFTY1	7.25039	-0.189681	0.224939	0	1	NA	NA	Not DE	T1_V_T0
ENSG00000255835.1	ENSG00000255835	17.7635	0.196707	0.120161	0	1	1	FALSE	Not DE	T1_V_T0
ENSG00000143751.10	SDE2	189.096	0.0495082	0.0740168	0	1	1	FALSE	Not DE	T1_V_T0
ENSG00000272562.2	H3-3A-DT	144.948	0.0798065	0.0609737	0	1	1	FALSE	Not DE	T1_V_T0
ENSG00000163041.13	H3-3A	6400.54	-0.159796	0.0627925	0	1	1	FALSE	Not DE	T1_V_T0
ENSG00000182827.9	ACBD3	292.13	0.0335889	0.0482721	0	1	1	FALSE	Not DE	T1_V_T0
ENSG00000183814.16	LIN9	25.0994	0.265457	0.109318	0.598775	0.549323	1	FALSE	Not DE	T1_V_T0
ENSG00000143799.14	PARP1	1113.9	-0.0987809	0.0399452	0	1	1	FALSE	Not DE	T1_V_T0
ENSG00000143772.11	ITPKB	1920.64	0.118767	0.0401058	0	1	1	FALSE	Not DE	T1_V_T0
ENSG00000143776.20	CDC42BPA	38.3278	0.262213	0.116471	0.534156	0.593234	1	FALSE	Not DE	T1_V_T0
ENSG00000181450.18	ZNF678	85.1041	0.114424	0.08451	0	1	1	FALSE	Not DE	T1_V_T0
ENSG00000143740.15	SNAP47	263.458	0.0475963	0.0443052	0	1	1	FALSE	Not DE	T1_V_T0
ENSG00000081692.13	JMJD4	209.318	-0.0443577	0.0644916	0	1	1	FALSE	Not DE	T1_V_T0
ENSG00000286389.2	ENSG00000286389	6.11445	0.00293891	0.225053	0	1	NA	NA	Not DE	T1_V_T0
ENSG00000143761.17	ARF1	6058.85	-0.0598679	0.0434494	0	1	1	FALSE	Not DE	T1_V_T0
ENSG00000143793.13	C1orf35	230.389	0.0160679	0.0600332	0	1	1	FALSE	Not DE	T1_V_T0
ENSG00000162910.19	MRPL55	356.203	0.0158939	0.0613612	0	1	1	FALSE	Not DE	T1_V_T0
ENSG00000280157.1	ENSG00000280157	8.69445	0.0883756	0.182254	0	1	1	FALSE	Not DE	T1_V_T0
ENSG00000143774.18	GUK1	10368.3	0.0814275	0.0887482	0	1	1	FALSE	Not DE	T1_V_T0
ENSG00000198835.4	GJC2	14.5789	0.0574354	0.159497	0	1	1	FALSE	Not DE	T1_V_T0
ENSG00000181873.13	IBA57	117.467	0.180447	0.0673039	0	1	1	FALSE	Not DE	T1_V_T0
ENSG00000162913.10	OBSCN-AS1	28.3266	0.0466108	0.117257	0	1	1	FALSE	Not DE	T1_V_T0
ENSG00000154358.23	OBSCN	541.271	-0.0324118	0.0727718	0	1	1	FALSE	Not DE	T1_V_T0
ENSG00000269934.3	ENSG00000269934	20.8306	0.133852	0.115584	0	1	1	FALSE	Not DE	T1_V_T0
ENSG00000154370.16	TRIM11	787.305	-0.0247202	0.0357072	0	1	1	FALSE	Not DE	T1_V_T0
ENSG00000231563.3	ENSG00000231563	64.7303	0.0149258	0.0855593	0	1	1	FALSE	Not DE	T1_V_T0
ENSG00000162931.12	TRIM17	10.6945	0.234652	0.170396	0.203362	0.838852	1	FALSE	Not DE	T1_V_T0
ENSG00000181218.6	H2AC25	63.8092	0.383943	0.117874	1.56051	0.118639	1	FALSE	Not DE	T1_V_T0
ENSG00000196890.5	H2BC26	9.58715	0.433465	0.183783	1.27033	0.203968	1	FALSE	Not DE	T1_V_T0
ENSG00000168159.15	RNF187	1552.94	0.0462864	0.0608804	0	1	1	FALSE	Not DE	T1_V_T0
ENSG00000234975.6	FTH1P2	104.127	-0.16093	0.165988	0	1	1	FALSE	Not DE	T1_V_T0
ENSG00000116574.6	RHOU	180.021	-0.060051	0.0621183	0	1	1	FALSE	Not DE	T1_V_T0
ENSG00000168118.12	RAB4A	392.361	-0.0382166	0.0367138	0	1	1	FALSE	Not DE	T1_V_T0
ENSG00000154429.11	CCSAP	284.684	0.0776892	0.0582504	0	1	1	FALSE	Not DE	T1_V_T0
ENSG00000069248.12	NUP133	345.282	-0.0489184	0.0445929	0	1	1	FALSE	Not DE	T1_V_T0
ENSG00000135776.5	ABCB10	216.458	0.208786	0.0715171	0.122854	0.902223	1	FALSE	Not DE	T1_V_T0
ENSG00000135801.11	TAF5L	181.04	-0.0633374	0.0534855	0	1	1	FALSE	Not DE	T1_V_T0
ENSG00000135763.10	URB2	66.661	0.0523236	0.0741261	0	1	1	FALSE	Not DE	T1_V_T0
ENSG00000228058.4	LINC01736	6.75189	0.0204396	0.211487	0	1	NA	NA	Not DE	T1_V_T0
ENSG00000143641.10	GALNT2	758.436	-0.0648528	0.0321579	0	1	1	FALSE	Not DE	T1_V_T0
ENSG00000135775.14	COG2	304.053	0.00783395	0.038647	0	1	1	FALSE	Not DE	T1_V_T0
ENSG00000119280.17	C1orf198	114.107	-0.229389	0.0769712	-0.381823	0.702593	1	FALSE	Not DE	T1_V_T0
ENSG00000143643.13	TTC13	444.971	0.187979	0.0438613	0	1	1	FALSE	Not DE	T1_V_T0
ENSG00000173409.14	ARV1	88.5687	-0.178921	0.0712905	0	1	1	FALSE	Not DE	T1_V_T0
ENSG00000182118.8	FAM89A	29.7766	-0.27998	0.105464	-0.758365	0.448233	1	FALSE	Not DE	T1_V_T0
ENSG00000143633.13	C1orf131	145.535	-0.0571145	0.0588932	0	1	1	FALSE	Not DE	T1_V_T0
ENSG00000116906.13	GNPAT	574.098	0.0333905	0.0315605	0	1	1	FALSE	Not DE	T1_V_T0
ENSG00000116903.7	EXOC8	303.83	0.0519272	0.051733	0	1	1	FALSE	Not DE	T1_V_T0
ENSG00000010072.16	SPRTN	76.8559	0.0113028	0.064011	0	1	1	FALSE	Not DE	T1_V_T0
ENSG00000287856.1	ENSG00000287856	7.87833	-0.392309	0.211535	-0.909114	0.36329	NA	NA	Not DE	T1_V_T0
ENSG00000270106.6	TSNAX-DISC1	17.9332	0.152489	0.117226	0	1	1	FALSE	Not DE	T1_V_T0
ENSG00000162946.23	DISC1	695.041	-0.075015	0.0985878	0	1	1	FALSE	Not DE	T1_V_T0
ENSG00000116991.12	SIPA1L2	521.709	-0.0289006	0.11985	0	1	1	FALSE	Not DE	T1_V_T0
ENSG00000212916.6	MAP10	18.7136	0.0397476	0.125268	0	1	1	FALSE	Not DE	T1_V_T0
ENSG00000135778.12	NTPCR	170.179	0.0148254	0.042244	0	1	1	FALSE	Not DE	T1_V_T0
ENSG00000135749.19	PCNX2	304.773	0.27446	0.0668917	1.11315	0.265646	1	FALSE	Not DE	T1_V_T0
ENSG00000143674.11	MAP3K21	19.8936	0.0841138	0.122287	0	1	1	FALSE	Not DE	T1_V_T0
ENSG00000183780.13	SLC35F3	28.3686	0.648203	0.137924	3.24964	0.00115549	0.0902928	FALSE	Not DE	T1_V_T0
ENSG00000235605.1	ENSG00000235605	10.5314	-0.103024	0.226872	0	1	1	FALSE	Not DE	T1_V_T0
ENSG00000231663.3	COA6-AS1	34.3884	0.257679	0.101786	0.566664	0.570942	1	FALSE	Not DE	T1_V_T0
ENSG00000168275.16	COA6	145.168	-0.198454	0.0605728	0	1	1	FALSE	Not DE	T1_V_T0
ENSG00000059588.10	TARBP1	292.887	0.239079	0.0579931	0.673861	0.5004	1	FALSE	Not DE	T1_V_T0
ENSG00000168264.11	IRF2BP2	1343.8	0.0443588	0.0357564	0	1	1	FALSE	Not DE	T1_V_T0
ENSG00000286263.1	ENSG00000286263	21.0797	0.312976	0.18097	0.624283	0.532442	1	FALSE	Not DE	T1_V_T0
ENSG00000238005.5	LNCATV	153.86	0.0723098	0.0914858	0	1	1	FALSE	Not DE	T1_V_T0
ENSG00000258082.2	ENSG00000258082	25.5034	-0.0988692	0.116562	0	1	1	FALSE	Not DE	T1_V_T0
ENSG00000173726.11	TOMM20	786.634	0.0396222	0.0368692	0	1	1	FALSE	Not DE	T1_V_T0
ENSG00000188739.15	RBM34	12.7487	-0.258906	0.141427	-0.416515	0.677033	1	FALSE	Not DE	T1_V_T0
ENSG00000054267.22	ARID4B	1148.23	0.102735	0.0646846	0	1	1	FALSE	Not DE	T1_V_T0
ENSG00000285053.1	TBCE	17.821	0.131475	0.116169	0	1	1	FALSE	Not DE	T1_V_T0
ENSG00000162885.14	B3GALNT2	126.418	0.0914725	0.0506254	0	1	1	FALSE	Not DE	T1_V_T0
ENSG00000143669.16	LYST	3417.54	0.211534	0.0621227	0.18567	0.852704	1	FALSE	Not DE	T1_V_T0
ENSG00000116962.15	NID1	118.651	0.0136118	0.0745841	0	1	1	FALSE	Not DE	T1_V_T0
ENSG00000077585.14	GPR137B	225.782	-0.0191244	0.0547863	0	1	1	FALSE	Not DE	T1_V_T0
ENSG00000086619.15	ERO1B	236.355	0.203111	0.0516489	0.0602327	0.95197	1	FALSE	Not DE	T1_V_T0
ENSG00000186197.15	EDARADD	27.7276	0.30946	0.111112	0.985137	0.324557	1	FALSE	Not DE	T1_V_T0
ENSG00000116977.19	LGALS8	909.033	-0.144404	0.0468155	0	1	1	FALSE	Not DE	T1_V_T0
ENSG00000273058.2	ENSG00000273058	24.1185	0.21168	0.127657	0.0914936	0.9271	1	FALSE	Not DE	T1_V_T0
ENSG00000230325.1	ENSG00000230325	36.0899	0.123531	0.0926137	0	1	1	FALSE	Not DE	T1_V_T0
ENSG00000119285.11	HEATR1	196.655	-0.0403942	0.0600064	0	1	1	FALSE	Not DE	T1_V_T0
ENSG00000116984.15	MTR	289.731	0.105401	0.0687948	0	1	1	FALSE	Not DE	T1_V_T0
ENSG00000198626.18	RYR2	20.989	0.595934	0.186976	2.11757	0.0342117	0.880695	FALSE	Not DE	T1_V_T0
ENSG00000133019.12	CHRM3	9.86134	0.584674	0.234228	1.6423	0.100527	1	FALSE	Not DE	T1_V_T0
ENSG00000233355.7	CHRM3-AS2	265.173	0.284764	0.0762485	1.11168	0.266276	1	FALSE	Not DE	T1_V_T0
ENSG00000180875.5	GREM2	13.477	-0.0362233	0.168122	0	1	1	FALSE	Not DE	T1_V_T0
ENSG00000182901.18	RGS7	21.6212	0.640948	0.185967	2.37111	0.017735	0.582116	FALSE	Not DE	T1_V_T0
ENSG00000091483.8	FH	262.244	-0.107719	0.0472092	0	1	1	FALSE	Not DE	T1_V_T0
ENSG00000117009.12	KMO	131.991	-0.1963	0.0705785	0	1	1	FALSE	Not DE	T1_V_T0
ENSG00000054277.14	OPN3	178.862	-0.147892	0.0501052	0	1	1	FALSE	Not DE	T1_V_T0
ENSG00000143702.16	CEP170	20.0136	0.0696253	0.168553	0	1	1	FALSE	Not DE	T1_V_T0
ENSG00000054282.16	SDCCAG8	110.567	-0.115392	0.0573508	0	1	1	FALSE	Not DE	T1_V_T0
ENSG00000117020.19	AKT3	19.3762	-0.0560797	0.150983	0	1	1	FALSE	Not DE	T1_V_T0
ENSG00000289055.2	ENSG00000289055	10.8186	0.266518	0.160065	0.415568	0.677726	1	FALSE	Not DE	T1_V_T0
ENSG00000179456.12	ZBTB18	1450.83	0.0467285	0.057792	0	1	1	FALSE	Not DE	T1_V_T0
ENSG00000289439.2	ENSG00000289439	83.5576	0.466634	0.107299	2.48497	0.0129563	0.466003	FALSE	Not DE	T1_V_T0
ENSG00000240963.1	ENSG00000240963	33.9962	0.0872242	0.111519	0	1	1	FALSE	Not DE	T1_V_T0
ENSG00000035687.10	ADSS2	267.013	0.117032	0.0887839	0	1	1	FALSE	Not DE	T1_V_T0
ENSG00000179397.18	CATSPERE	22.0501	0.395874	0.133814	1.46378	0.143255	1	FALSE	Not DE	T1_V_T0
ENSG00000121644.19	DESI2	290.269	0.0101456	0.0432278	0	1	1	FALSE	Not DE	T1_V_T0
ENSG00000203667.10	COX20	283.21	-0.0225186	0.0465925	0	1	1	FALSE	Not DE	T1_V_T0
ENSG00000153187.21	HNRNPU	4360.17	-0.040489	0.0272207	0	1	1	FALSE	Not DE	T1_V_T0
ENSG00000203666.13	EFCAB2	300.645	-0.6356	0.103692	-4.20092	2.65837e-05	0.00626235	TRUE	DE Down	T1_V_T0
ENSG00000185420.19	SMYD3	553.864	0.282122	0.101153	0.81186	0.416872	1	FALSE	Not DE	T1_V_T0
ENSG00000162851.8	TFB2M	76.2568	0.0826512	0.0661816	0	1	1	FALSE	Not DE	T1_V_T0
ENSG00000162852.14	CNST	467.74	0.0685989	0.047195	0	1	1	FALSE	Not DE	T1_V_T0
ENSG00000260698.1	ENSG00000260698	15.0397	-0.0292528	0.132839	0	1	1	FALSE	Not DE	T1_V_T0
ENSG00000143653.10	SCCPDH	177.098	0.00466764	0.0579887	0	1	1	FALSE	Not DE	T1_V_T0
ENSG00000223519.8	KIF28P	56.1031	-0.0195049	0.0973862	0	1	1	FALSE	Not DE	T1_V_T0
ENSG00000227953.7	LINC01341	22.6587	0.231768	0.118445	0.268209	0.788539	1	FALSE	Not DE	T1_V_T0
ENSG00000153207.16	AHCTF1	802.801	0.252234	0.0682972	0.764804	0.444388	1	FALSE	Not DE	T1_V_T0
ENSG00000135747.11	ZNF670-ZNF695	6.49808	0.00208936	0.207944	0	1	NA	NA	Not DE	T1_V_T0
ENSG00000188295.15	ZNF669	26.391	0.0835574	0.109192	0	1	1	FALSE	Not DE	T1_V_T0
ENSG00000196418.13	ZNF124	100.13	0.0816797	0.0722317	0	1	1	FALSE	Not DE	T1_V_T0
ENSG00000259865.1	ENSG00000259865	209.112	0.237827	0.0891585	0.424271	0.671368	1	FALSE	Not DE	T1_V_T0
ENSG00000290124.1	ENSG00000290124	10.1783	0.0131934	0.221343	0	1	1	FALSE	Not DE	T1_V_T0
ENSG00000227671.5	ZNF731P	217.893	0.172474	0.0705696	0	1	1	FALSE	Not DE	T1_V_T0
ENSG00000290683.1	ENSG00000290683	6.44254	0.274855	0.216226	0.346189	0.729201	NA	NA	Not DE	T1_V_T0
ENSG00000162714.13	ZNF496	250.942	-0.276505	0.0749802	-1.02033	0.307571	1	FALSE	Not DE	T1_V_T0
ENSG00000162711.18	NLRP3	69.7678	-0.0847594	0.0785677	0	1	1	FALSE	Not DE	T1_V_T0
ENSG00000169224.13	GCSAML	32.4198	0.222861	0.111123	0.205727	0.837004	1	FALSE	Not DE	T1_V_T0
ENSG00000162722.9	TRIM58	2588.42	0.239505	0.138532	0.285171	0.775513	1	FALSE	Not DE	T1_V_T0
ENSG00000238243.3	OR2W3	235.601	0.50876	0.143906	2.14556	0.0319077	0.841074	FALSE	Not DE	T1_V_T0
ENSG00000175137.11	SH3BP5L	1471.13	0.020498	0.0443025	0	1	1	FALSE	Not DE	T1_V_T0
ENSG00000171161.13	ZNF672	871.01	-0.19338	0.0503694	0	1	1	FALSE	Not DE	T1_V_T0
ENSG00000171163.16	ZNF692	889.196	0.0977549	0.0484682	0	1	1	FALSE	Not DE	T1_V_T0
ENSG00000185220.12	PGBD2	128.045	0.00593252	0.0481991	0	1	1	FALSE	Not DE	T1_V_T0
ENSG00000233084.2	RPL23AP25	7.24116	0.132395	0.186967	0	1	NA	NA	Not DE	T1_V_T0
ENSG00000035115.22	SH3YL1	205.116	0.103233	0.064669	0	1	1	FALSE	Not DE	T1_V_T0
ENSG00000143727.16	ACP1	508.742	0.00835372	0.051961	0	1	1	FALSE	Not DE	T1_V_T0
ENSG00000151353.15	TMEM18	240.79	0.00384131	0.047361	0	1	1	FALSE	Not DE	T1_V_T0
ENSG00000233296.2	TMEM18-DT	6.36487	0.152256	0.226483	0	1	NA	NA	Not DE	T1_V_T0
ENSG00000235688.3	SNTG2-AS1	6.63089	0.00408663	0.214016	0	1	NA	NA	Not DE	T1_V_T0
ENSG00000172554.12	SNTG2	12.3213	0.122996	0.216167	0	1	1	FALSE	Not DE	T1_V_T0
ENSG00000289608.2	ENSG00000289608	10.437	0.372247	0.238653	0.721749	0.470449	1	FALSE	Not DE	T1_V_T0
ENSG00000234423.2	LINC01250	8.98879	0.259918	0.219194	0.273357	0.784579	1	FALSE	Not DE	T1_V_T0
ENSG00000032389.13	EIPR1	315.645	-0.0488235	0.0447878	0	1	1	FALSE	Not DE	T1_V_T0
ENSG00000171853.16	TRAPPC12	428.298	-0.0320217	0.040204	0	1	1	FALSE	Not DE	T1_V_T0
ENSG00000182551.14	ADI1	255.396	-0.0867027	0.0488782	0	1	1	FALSE	Not DE	T1_V_T0
ENSG00000235078.1	ENSG00000235078	7.2826	-0.0930083	0.19437	0	1	NA	NA	Not DE	T1_V_T0
ENSG00000234171.5	RNASEH1-DT	32.1982	-0.118465	0.0962618	0	1	1	FALSE	Not DE	T1_V_T0
ENSG00000287126.1	ENSG00000287126	17.4527	-0.275174	0.122704	-0.612646	0.540111	1	FALSE	Not DE	T1_V_T0
ENSG00000171863.15	RPS7	6495.82	-0.0199223	0.0464132	0	1	1	FALSE	Not DE	T1_V_T0
ENSG00000188765.7	TMSB4XP2	45.8909	-0.0907785	0.144181	0	1	1	FALSE	Not DE	T1_V_T0
ENSG00000205837.7	LINC00487	13.0446	-0.0239741	0.233227	0	1	1	FALSE	Not DE	T1_V_T0
ENSG00000225964.6	NRIR	135.639	-0.402627	0.153988	-1.31586	0.18822	1	FALSE	Not DE	T1_V_T0
ENSG00000134326.12	CMPK2	542.488	-0.535473	0.155991	-2.15059	0.0315084	0.834334	FALSE	Not DE	T1_V_T0
ENSG00000134321.13	RSAD2	2080	-0.832041	0.197239	-3.20444	0.00135325	0.100637	FALSE	Not DE	T1_V_T0
ENSG00000151692.15	RNF144A	423.778	0.17495	0.0682607	0	1	1	FALSE	Not DE	T1_V_T0
ENSG00000229727.7	ENSG00000229727	7.01674	0.328548	0.20698	0.621064	0.534558	NA	NA	Not DE	T1_V_T0
ENSG00000235576.3	LINC01871	175.512	0.0835906	0.0796619	0	1	1	FALSE	Not DE	T1_V_T0
ENSG00000235665.6	LINC00298	35.8767	0.339773	0.108247	1.29124	0.19662	1	FALSE	Not DE	T1_V_T0
ENSG00000236790.7	LINC00299	197.994	0.402564	0.0859253	2.35744	0.0184013	0.593855	FALSE	Not DE	T1_V_T0
ENSG00000236008.5	LINC01814	45.172	0.214268	0.0894273	0.159549	0.873236	1	FALSE	Not DE	T1_V_T0
ENSG00000235092.7	ID2-AS1	29.5315	-0.0106768	0.0882691	0	1	1	FALSE	Not DE	T1_V_T0
ENSG00000115738.10	ID2	803.397	-0.0160456	0.0628083	0	1	1	FALSE	Not DE	T1_V_T0
ENSG00000134313.17	KIDINS220	754.051	0.0668104	0.0638865	0	1	1	FALSE	Not DE	T1_V_T0
ENSG00000143797.12	MBOAT2	830.432	0.0946299	0.075958	0	1	1	FALSE	Not DE	T1_V_T0
ENSG00000151693.11	ASAP2	75.9293	-0.189477	0.0855297	0	1	1	FALSE	Not DE	T1_V_T0
ENSG00000119185.13	ITGB1BP1	434.869	-0.034045	0.03543	0	1	1	FALSE	Not DE	T1_V_T0
ENSG00000119203.14	CPSF3	307.323	-0.0788675	0.043997	0	1	1	FALSE	Not DE	T1_V_T0
ENSG00000134330.19	IAH1	263.521	-0.021612	0.042721	0	1	1	FALSE	Not DE	T1_V_T0
ENSG00000151694.15	ADAM17	633.074	-0.1044	0.0449274	0	1	1	FALSE	Not DE	T1_V_T0
ENSG00000239300.6	ENSG00000239300	11.8628	0.260735	0.164166	0.369963	0.71141	1	FALSE	Not DE	T1_V_T0
ENSG00000271855.1	ENSG00000271855	9.68434	0.24266	0.160302	0.266125	0.790143	1	FALSE	Not DE	T1_V_T0
ENSG00000134308.14	YWHAQ	1184.74	-0.0259228	0.0347918	0	1	1	FALSE	Not DE	T1_V_T0
ENSG00000115750.17	TAF1B	84.9768	0.0429862	0.0820686	0	1	1	FALSE	Not DE	T1_V_T0
ENSG00000269973.1	ENSG00000269973	57.8572	0.0276621	0.0779346	0	1	1	FALSE	Not DE	T1_V_T0
ENSG00000134317.18	GRHL1	23.8872	-0.0667903	0.10712	0	1	1	FALSE	Not DE	T1_V_T0
ENSG00000260077.1	ENSG00000260077	100.534	0.0967991	0.0628456	0	1	1	FALSE	Not DE	T1_V_T0
ENSG00000172059.11	KLF11	209.118	-0.130052	0.0603891	0	1	1	FALSE	Not DE	T1_V_T0
ENSG00000171848.16	RRM2	99.192	0.179894	0.124359	0	1	1	FALSE	Not DE	T1_V_T0
ENSG00000115756.13	HPCAL1	1678.34	0.0849431	0.0434791	0	1	1	FALSE	Not DE	T1_V_T0
ENSG00000115758.14	ODC1	778.816	0.0222657	0.0565682	0	1	1	FALSE	Not DE	T1_V_T0
ENSG00000257135.8	ODC1-DT	26.2126	-0.126994	0.0983192	0	1	1	FALSE	Not DE	T1_V_T0
ENSG00000115761.17	NOL10	250.624	0.0840663	0.0439099	0	1	1	FALSE	Not DE	T1_V_T0
ENSG00000143870.13	PDIA6	1200.77	-0.196443	0.0402735	0	1	1	FALSE	Not DE	T1_V_T0
ENSG00000271952.3	LINC01954	6.35671	0.388572	0.266817	0.706745	0.479725	NA	NA	Not DE	T1_V_T0
ENSG00000162976.13	SLC66A3	435.037	-0.157411	0.0524203	0	1	1	FALSE	Not DE	T1_V_T0
ENSG00000134318.16	ROCK2	294.687	0.0614082	0.0665084	0	1	1	FALSE	Not DE	T1_V_T0
ENSG00000224177.8	LINC00570	78.9542	0.290221	0.154422	0.584248	0.559053	1	FALSE	Not DE	T1_V_T0
ENSG00000169016.17	E2F6	74.314	0.0468557	0.06622	0	1	1	FALSE	Not DE	T1_V_T0
ENSG00000134324.12	LPIN1	401.96	0.0818748	0.0451747	0	1	1	FALSE	Not DE	T1_V_T0
ENSG00000224184.7	MIR3681HG	9.09813	0.391566	0.262441	0.729937	0.465429	1	FALSE	Not DE	T1_V_T0
ENSG00000071575.12	TRIB2	636.602	0.127541	0.0633467	0	1	1	FALSE	Not DE	T1_V_T0
ENSG00000151779.14	NBAS	517.909	-0.0236034	0.042601	0	1	1	FALSE	Not DE	T1_V_T0
ENSG00000079785.16	DDX1	416.137	-0.0317404	0.041702	0	1	1	FALSE	Not DE	T1_V_T0
ENSG00000197872.11	CYRIA	1820.04	0.152175	0.0445043	0	1	1	FALSE	Not DE	T1_V_T0
ENSG00000163029.16	SMC6	227.817	0.065477	0.0531825	0	1	1	FALSE	Not DE	T1_V_T0
ENSG00000178295.15	GEN1	75.9071	0.103045	0.0692091	0	1	1	FALSE	Not DE	T1_V_T0
ENSG00000240857.2	RDH14	79.3452	-0.0226036	0.0708734	0	1	1	FALSE	Not DE	T1_V_T0
ENSG00000236204.7	LINC01376	38.2406	0.316625	0.132241	0.881916	0.377822	1	FALSE	Not DE	T1_V_T0
ENSG00000228784.9	LINC00954	122.47	0.178473	0.0639636	0	1	1	FALSE	Not DE	T1_V_T0
ENSG00000183891.6	TTC32	152.983	0.0392257	0.0773246	0	1	1	FALSE	Not DE	T1_V_T0
ENSG00000118965.16	WDR35	71.4693	-0.0693166	0.07637	0	1	1	FALSE	Not DE	T1_V_T0
ENSG00000068697.7	LAPTM4A	1148.22	-0.177665	0.047432	0	1	1	FALSE	Not DE	T1_V_T0
ENSG00000115884.11	SDC1	9.29359	-0.475969	0.269325	-1.02467	0.30552	1	FALSE	Not DE	T1_V_T0
ENSG00000055917.17	PUM2	2081.74	0.102016	0.0331129	0	1	1	FALSE	Not DE	T1_V_T0
ENSG00000143878.10	RHOB	1782.32	0.0855804	0.0560993	0	1	1	FALSE	Not DE	T1_V_T0
ENSG00000118960.13	HS1BP3	827.01	-0.0801517	0.0512675	0	1	1	FALSE	Not DE	T1_V_T0
ENSG00000143869.7	GDF7	12.5081	-0.0732018	0.191088	0	1	1	FALSE	Not DE	T1_V_T0
ENSG00000118961.15	LDAH	147.937	0.121311	0.0594335	0	1	1	FALSE	Not DE	T1_V_T0
ENSG00000119771.15	KLHL29	30.6714	0.0933702	0.129553	0	1	1	FALSE	Not DE	T1_V_T0
ENSG00000283031.2	ENSG00000283031	10.0016	-0.0691332	0.154387	0	1	1	FALSE	Not DE	T1_V_T0
ENSG00000119778.15	ATAD2B	385.973	0.176772	0.0696714	0	1	1	FALSE	Not DE	T1_V_T0
ENSG00000173960.14	UBXN2A	122.938	0.0934687	0.0553253	0	1	1	FALSE	Not DE	T1_V_T0
ENSG00000205639.12	MFSD2B	141.231	0.249356	0.114263	0.431953	0.665776	1	FALSE	Not DE	T1_V_T0
ENSG00000163026.12	WDCP	98.7958	-0.11428	0.061682	0	1	1	FALSE	Not DE	T1_V_T0
ENSG00000119782.14	FKBP1B	47.9182	0.194342	0.118346	0	1	1	FALSE	Not DE	T1_V_T0
ENSG00000115128.7	SF3B6	719.947	-0.154818	0.0499436	0	1	1	FALSE	Not DE	T1_V_T0
ENSG00000219626.9	FAM228B	164.185	0.0825077	0.0590202	0	1	1	FALSE	Not DE	T1_V_T0
ENSG00000115129.14	TP53I3	132.454	-0.0427492	0.0746393	0	1	1	FALSE	Not DE	T1_V_T0
ENSG00000198399.16	ITSN2	1282.38	0.0917728	0.0503871	0	1	1	FALSE	Not DE	T1_V_T0
ENSG00000084676.16	NCOA1	2330.73	0.0895305	0.0607243	0	1	1	FALSE	Not DE	T1_V_T0
ENSG00000184924.6	PTRHD1	215.305	0.00102007	0.0620127	0	1	1	FALSE	Not DE	T1_V_T0
ENSG00000138092.11	CENPO	73.6207	-0.0247589	0.0723507	0	1	1	FALSE	Not DE	T1_V_T0
ENSG00000138031.15	ADCY3	315.038	-0.679633	0.108699	-4.41251	1.02179e-05	0.00314589	TRUE	DE Down	T1_V_T0
ENSG00000115137.12	DNAJC27	58.5918	-0.181399	0.0827052	0	1	1	FALSE	Not DE	T1_V_T0
ENSG00000224165.8	DNAJC27-AS1	31.2018	-0.140059	0.113133	0	1	1	FALSE	Not DE	T1_V_T0
ENSG00000115138.11	POMC	50.7473	-0.143193	0.105175	0	1	1	FALSE	Not DE	T1_V_T0
ENSG00000119772.19	DNMT3A	750.638	0.0405962	0.0376388	0	1	1	FALSE	Not DE	T1_V_T0
ENSG00000235072.2	ARNILA	13.7968	0.134265	0.139009	0	1	1	FALSE	Not DE	T1_V_T0
ENSG00000138101.20	DTNB	256.086	-0.0236694	0.0602999	0	1	1	FALSE	Not DE	T1_V_T0
ENSG00000143970.18	ASXL2	540.54	0.156749	0.0638116	0	1	1	FALSE	Not DE	T1_V_T0
ENSG00000084731.15	KIF3C	150.086	0.0187615	0.0641657	0	1	1	FALSE	Not DE	T1_V_T0
ENSG00000084733.11	RAB10	1600.83	-0.0794463	0.0476088	0	1	1	FALSE	Not DE	T1_V_T0
ENSG00000157833.13	GAREM2	33.0241	-0.0880086	0.115637	0	1	1	FALSE	Not DE	T1_V_T0
ENSG00000084754.12	HADHA	2517.97	-0.102754	0.0296863	0	1	1	FALSE	Not DE	T1_V_T0
ENSG00000138029.14	HADHB	1084.9	-0.0934178	0.0388535	0	1	1	FALSE	Not DE	T1_V_T0
ENSG00000286707.1	ENSG00000286707	9.622	-0.251938	0.172048	-0.301884	0.76274	1	FALSE	Not DE	T1_V_T0
ENSG00000173567.16	ADGRF3	14.7279	-0.118569	0.135208	0	1	1	FALSE	Not DE	T1_V_T0
ENSG00000138018.19	SELENOI	176.365	0.158376	0.0495954	0	1	1	FALSE	Not DE	T1_V_T0
ENSG00000157856.12	DRC1	29.3495	0.0502046	0.154221	0	1	1	FALSE	Not DE	T1_V_T0
ENSG00000115155.19	OTOF	137.974	-1.07638	0.24153	-3.62846	0.000285122	0.0330013	TRUE	DE Down	T1_V_T0
ENSG00000115163.15	CENPA	40.2457	0.117017	0.09241	0	1	1	FALSE	Not DE	T1_V_T0
ENSG00000084764.12	MAPRE3	170.344	0.128378	0.0658606	0	1	1	FALSE	Not DE	T1_V_T0
ENSG00000119777.20	TMEM214	923.446	-0.0866431	0.0463713	0	1	1	FALSE	Not DE	T1_V_T0
ENSG00000084693.16	AGBL5	153.913	-0.101054	0.05413	0	1	1	FALSE	Not DE	T1_V_T0
ENSG00000228474.6	OST4	3786.27	-0.0941332	0.0650181	0	1	1	FALSE	Not DE	T1_V_T0
ENSG00000138080.14	EMILIN1	26.5894	-0.128667	0.118221	0	1	1	FALSE	Not DE	T1_V_T0
ENSG00000138030.14	KHK	64.5733	-0.083054	0.0835225	0	1	1	FALSE	Not DE	T1_V_T0
ENSG00000143994.14	ABHD1	9.2048	0.196102	0.178621	0	1	1	FALSE	Not DE	T1_V_T0
ENSG00000138073.14	PREB	802.776	0.0220751	0.035924	0	1	1	FALSE	Not DE	T1_V_T0
ENSG00000138074.15	SLC5A6	272.742	-0.112909	0.0458648	0	1	1	FALSE	Not DE	T1_V_T0
ENSG00000138085.18	ATRAID	744.811	-0.167425	0.0439427	0	1	1	FALSE	Not DE	T1_V_T0
ENSG00000084774.14	CAD	485.701	-0.088858	0.047147	0	1	1	FALSE	Not DE	T1_V_T0
ENSG00000163794.6	UCN	30.7983	0.0914242	0.115562	0	1	1	FALSE	Not DE	T1_V_T0
ENSG00000115204.15	MPV17	430.914	-0.0687085	0.0405619	0	1	1	FALSE	Not DE	T1_V_T0
ENSG00000115207.15	GTF3C2	671.033	0.0388492	0.0316365	0	1	1	FALSE	Not DE	T1_V_T0
ENSG00000234072.1	GTF3C2-AS2	89.1781	0.0745647	0.0601734	0	1	1	FALSE	Not DE	T1_V_T0
ENSG00000115211.17	EIF2B4	473.52	0.0538343	0.040757	0	1	1	FALSE	Not DE	T1_V_T0
ENSG00000115234.11	SNX17	2262.69	-0.096949	0.0557646	0	1	1	FALSE	Not DE	T1_V_T0
ENSG00000163795.14	ZNF513	384.294	0.0121525	0.0452512	0	1	1	FALSE	Not DE	T1_V_T0
ENSG00000115241.11	PPM1G	1152.73	-0.142223	0.0416489	0	1	1	FALSE	Not DE	T1_V_T0
ENSG00000115216.14	NRBP1	2113.46	-0.132068	0.036341	0	1	1	FALSE	Not DE	T1_V_T0
ENSG00000157992.12	KRTCAP3	56.6482	0.0776003	0.0727007	0	1	1	FALSE	Not DE	T1_V_T0
ENSG00000138002.16	IFT172	120.971	-0.0513658	0.0626031	0	1	1	FALSE	Not DE	T1_V_T0
ENSG00000176714.10	CCDC121	15.0295	-0.278259	0.149307	-0.52415	0.600174	1	FALSE	Not DE	T1_V_T0
ENSG00000198522.14	GPN1	280.357	0.0167228	0.0436398	0	1	1	FALSE	Not DE	T1_V_T0
ENSG00000119760.16	SUPT7L	516.266	-0.0538574	0.0414312	0	1	1	FALSE	Not DE	T1_V_T0
ENSG00000163798.14	SLC4A1AP	315.202	-0.12456	0.0429292	0	1	1	FALSE	Not DE	T1_V_T0
ENSG00000243147.8	MRPL33	336.06	-0.10731	0.0463181	0	1	1	FALSE	Not DE	T1_V_T0
ENSG00000171174.15	RBKS	36.8098	0.00778193	0.0947004	0	1	1	FALSE	Not DE	T1_V_T0
ENSG00000158019.21	BABAM2	881.531	0.0374377	0.0490746	0	1	1	FALSE	Not DE	T1_V_T0
ENSG00000075426.12	FOSL2	2426.26	-0.23332	0.0656797	-0.507306	0.61194	1	FALSE	Not DE	T1_V_T0
ENSG00000270210.1	ENSG00000270210	39.1986	-0.0234662	0.118684	0	1	1	FALSE	Not DE	T1_V_T0
ENSG00000163803.13	PLB1	933.991	0.0581594	0.0857158	0	1	1	FALSE	Not DE	T1_V_T0
ENSG00000226833.7	PPP1CB-DT	30.0087	0.191814	0.105159	0	1	1	FALSE	Not DE	T1_V_T0
ENSG00000213639.11	PPP1CB	147.631	0.146413	0.116558	0	1	1	FALSE	Not DE	T1_V_T0
ENSG00000163806.16	SPDYA	12.1362	0.374015	0.182303	0.954537	0.339812	1	FALSE	Not DE	T1_V_T0
ENSG00000171103.11	TRMT61B	93.74	0.128265	0.0662921	0	1	1	FALSE	Not DE	T1_V_T0
ENSG00000163811.12	WDR43	201.315	0.0218567	0.053566	0	1	1	FALSE	Not DE	T1_V_T0
ENSG00000189350.13	TOGARAM2	143.81	0.058586	0.0774515	0	1	1	FALSE	Not DE	T1_V_T0
ENSG00000115295.21	CLIP4	258.769	0.0128757	0.0728063	0	1	1	FALSE	Not DE	T1_V_T0
ENSG00000119801.13	YPEL5	2230.66	0.0216249	0.0445839	0	1	1	FALSE	Not DE	T1_V_T0
ENSG00000213626.13	LBH	1981.48	-0.0721947	0.0617343	0	1	1	FALSE	Not DE	T1_V_T0
ENSG00000172954.14	LCLAT1	152.116	0.199739	0.0849951	0	1	1	FALSE	Not DE	T1_V_T0
ENSG00000162949.16	CAPN13	7.06638	0.698189	0.316978	1.57168	0.116025	NA	NA	Not DE	T1_V_T0
ENSG00000158089.15	GALNT14	245.529	0.0106017	0.171901	0	1	1	FALSE	Not DE	T1_V_T0
ENSG00000214711.10	CAPN14	7.56357	0.525891	0.197056	1.6538	0.0981674	NA	NA	Not DE	T1_V_T0
ENSG00000013016.16	EHD3	290.596	-0.165658	0.0678177	0	1	1	FALSE	Not DE	T1_V_T0
ENSG00000162959.14	MEMO1	25.6709	0.181774	0.134914	0	1	1	FALSE	Not DE	T1_V_T0
ENSG00000162961.14	DPY30	318.191	-0.0336029	0.0384572	0	1	1	FALSE	Not DE	T1_V_T0
ENSG00000021574.14	SPAST	432.414	0.182995	0.0617761	0	1	1	FALSE	Not DE	T1_V_T0
ENSG00000152683.14	SLC30A6	216.286	0.0710874	0.0471025	0	1	1	FALSE	Not DE	T1_V_T0
ENSG00000091106.19	NLRC4	853.674	-0.289232	0.0833155	-1.07102	0.284162	1	FALSE	Not DE	T1_V_T0
ENSG00000289727.1	ENSG00000289727	11.2232	0.123438	0.152859	0	1	1	FALSE	Not DE	T1_V_T0
ENSG00000119820.11	YIPF4	791.756	0.0635678	0.0517239	0	1	1	FALSE	Not DE	T1_V_T0
ENSG00000115760.16	BIRC6	1130.37	0.140733	0.0610413	0	1	1	FALSE	Not DE	T1_V_T0
ENSG00000018699.13	TTC27	162.598	0.038688	0.0532546	0	1	1	FALSE	Not DE	T1_V_T0
ENSG00000049323.16	LTBP1	126.687	0.0863737	0.0896756	0	1	1	FALSE	Not DE	T1_V_T0
ENSG00000152689.18	RASGRP3	136.958	-0.172666	0.0721331	0	1	1	FALSE	Not DE	T1_V_T0
ENSG00000119812.20	FAM98A	161.861	-0.028979	0.047097	0	1	1	FALSE	Not DE	T1_V_T0
ENSG00000150938.10	CRIM1	55.8389	0.3214	0.111215	1.09159	0.275015	1	FALSE	Not DE	T1_V_T0
ENSG00000171055.15	FEZ2	401.186	0.00282579	0.0448349	0	1	1	FALSE	Not DE	T1_V_T0
ENSG00000205221.13	VIT	8.47957	0.322438	0.226475	0.540625	0.588766	1	FALSE	Not DE	T1_V_T0
ENSG00000115808.12	STRN	425.001	0.114539	0.0506608	0	1	1	FALSE	Not DE	T1_V_T0
ENSG00000008869.12	HEATR5B	454.862	0.124625	0.052447	0	1	1	FALSE	Not DE	T1_V_T0
ENSG00000152133.17	GPATCH11	104.143	-0.0841329	0.0687846	0	1	1	FALSE	Not DE	T1_V_T0
ENSG00000055332.19	EIF2AK2	1132.31	-0.319097	0.0940338	-1.26653	0.205323	1	FALSE	Not DE	T1_V_T0
ENSG00000218739.10	CEBPZOS	258.375	0.0429626	0.0402639	0	1	1	FALSE	Not DE	T1_V_T0
ENSG00000115816.15	CEBPZ	310.592	-0.0428351	0.0508205	0	1	1	FALSE	Not DE	T1_V_T0
ENSG00000003509.16	NDUFAF7	164.081	0.094583	0.0495906	0	1	1	FALSE	Not DE	T1_V_T0
ENSG00000115825.11	PRKD3	313.27	0.0615571	0.0503361	0	1	1	FALSE	Not DE	T1_V_T0
ENSG00000115828.17	QPCT	1690.68	-0.227642	0.0981224	-0.281711	0.778165	1	FALSE	Not DE	T1_V_T0
ENSG00000236213.4	ENSG00000236213	33.653	0.110705	0.114097	0	1	1	FALSE	Not DE	T1_V_T0
ENSG00000290100.1	ENSG00000290100	104.268	0.0121349	0.0958835	0	1	1	FALSE	Not DE	T1_V_T0
ENSG00000163171.8	CDC42EP3	1905.73	0.0474366	0.0664828	0	1	1	FALSE	Not DE	T1_V_T0
ENSG00000237803.6	LINC00211	186.972	0.428526	0.0963551	2.3717	0.0177064	0.582116	FALSE	Not DE	T1_V_T0
ENSG00000115841.21	RMDN2	67.3635	0.088878	0.0810409	0	1	1	FALSE	Not DE	T1_V_T0
ENSG00000138061.12	CYP1B1	395.849	-0.0886381	0.0921204	0	1	1	FALSE	Not DE	T1_V_T0
ENSG00000232973.14	CYP1B1-AS1	108.027	0.0489591	0.0757924	0	1	1	FALSE	Not DE	T1_V_T0
ENSG00000119787.14	ATL2	240.267	0.185287	0.0613409	0	1	1	FALSE	Not DE	T1_V_T0
ENSG00000213553.4	RPLP0P6	99.0805	0.0122118	0.0956917	0	1	1	FALSE	Not DE	T1_V_T0
ENSG00000143889.16	HNRNPLL	353.758	-0.0923181	0.0635118	0	1	1	FALSE	Not DE	T1_V_T0
ENSG00000143891.17	GALM	517.269	-0.535764	0.0990906	-3.38846	0.000702865	0.0636465	FALSE	Not DE	T1_V_T0
ENSG00000115875.19	SRSF7	1501.85	0.0109524	0.0453676	0	1	1	FALSE	Not DE	T1_V_T0
ENSG00000152147.11	GEMIN6	131.858	-0.184763	0.0550991	0	1	1	FALSE	Not DE	T1_V_T0
ENSG00000163214.21	DHX57	255.658	-0.0376079	0.0419586	0	1	1	FALSE	Not DE	T1_V_T0
ENSG00000188010.16	MORN2	19.4354	-0.0850992	0.127533	0	1	1	FALSE	Not DE	T1_V_T0
ENSG00000115904.15	SOS1	774.952	0.00859053	0.0484549	0	1	1	FALSE	Not DE	T1_V_T0
ENSG00000011566.15	MAP4K3	95.7044	0.12776	0.0944819	0	1	1	FALSE	Not DE	T1_V_T0
ENSG00000231312.8	MAP4K3-DT	64.7337	-0.0215569	0.0770456	0	1	1	FALSE	Not DE	T1_V_T0
ENSG00000138050.15	THUMPD2	90.704	0.205911	0.0716405	0.0825072	0.934243	1	FALSE	Not DE	T1_V_T0
ENSG00000183023.19	SLC8A1	1588.28	0.167647	0.128741	0	1	1	FALSE	Not DE	T1_V_T0
ENSG00000287255.3	ENSG00000287255	264.578	0.0534858	0.111128	0	1	1	FALSE	Not DE	T1_V_T0
ENSG00000236533.1	RPS12P4	12.4467	0.0511803	0.211114	0	1	1	FALSE	Not DE	T1_V_T0
ENSG00000224875.2	EML4-AS1	10.3807	0.0449213	0.172901	0	1	1	FALSE	Not DE	T1_V_T0
ENSG00000143924.19	EML4	1017.09	0.193585	0.0441868	0	1	1	FALSE	Not DE	T1_V_T0
ENSG00000115944.15	COX7A2L	815.427	-0.0722913	0.0379177	0	1	1	FALSE	Not DE	T1_V_T0
ENSG00000057935.14	MTA3	156.224	0.117591	0.0544167	0	1	1	FALSE	Not DE	T1_V_T0
ENSG00000162881.7	OXER1	482.453	0.23906	0.0797833	0.489571	0.624438	1	FALSE	Not DE	T1_V_T0
ENSG00000162882.15	HAAO	132.209	-0.0956121	0.0740556	0	1	1	FALSE	Not DE	T1_V_T0
ENSG00000288886.2	ENSG00000288886	25.0741	-0.0119141	0.110805	0	1	1	FALSE	Not DE	T1_V_T0
ENSG00000289082.1	ENSG00000289082	7.13915	-0.378971	0.217492	-0.822883	0.410574	NA	NA	Not DE	T1_V_T0
ENSG00000231826.9	LINC01819	21.5445	0.760512	0.130728	4.28763	1.80588e-05	0.00471183	TRUE	DE Up	T1_V_T0
ENSG00000230587.5	LINC02580	275.767	0.369202	0.0660982	2.55986	0.0104715	0.399007	FALSE	Not DE	T1_V_T0
ENSG00000286796.1	ENSG00000286796	36.2077	0.135411	0.10175	0	1	1	FALSE	Not DE	T1_V_T0
ENSG00000287387.1	ENSG00000287387	18.4994	-0.28381	0.199117	-0.42091	0.67382	1	FALSE	Not DE	T1_V_T0
ENSG00000152518.8	ZFP36L2	4900.43	0.0868962	0.0412633	0	1	1	FALSE	Not DE	T1_V_T0
ENSG00000279873.2	LINC01126	9.42407	0.135053	0.18435	0	1	1	FALSE	Not DE	T1_V_T0
ENSG00000234936.1	ENSG00000234936	132.007	-0.0202881	0.064267	0	1	1	FALSE	Not DE	T1_V_T0
ENSG00000115970.19	THADA	636.548	0.0760662	0.0403991	0	1	1	FALSE	Not DE	T1_V_T0
ENSG00000138036.18	DYNC2LI1	34.073	-0.0582496	0.0935995	0	1	1	FALSE	Not DE	T1_V_T0
ENSG00000138095.20	LRPPRC	595.092	0.00876187	0.0391145	0	1	1	FALSE	Not DE	T1_V_T0
ENSG00000285542.1	ENSG00000285542	12.3786	0.00985686	0.153992	0	1	1	FALSE	Not DE	T1_V_T0
ENSG00000138078.16	PREPL	185.313	-0.0495818	0.0585851	0	1	1	FALSE	Not DE	T1_V_T0
ENSG00000143919.15	CAMKMT	359.297	0.262592	0.0889767	0.70346	0.481769	1	FALSE	Not DE	T1_V_T0
ENSG00000068784.13	SRBD1	457.68	-0.0250898	0.0779904	0	1	1	FALSE	Not DE	T1_V_T0
ENSG00000171132.14	PRKCE	475.885	0.0963715	0.104203	0	1	1	FALSE	Not DE	T1_V_T0
ENSG00000116016.14	EPAS1	69.6399	0.157474	0.0804823	0	1	1	FALSE	Not DE	T1_V_T0
ENSG00000250565.7	ATP6V1E2	80.9067	-0.0548734	0.0599367	0	1	1	FALSE	Not DE	T1_V_T0
ENSG00000119729.12	RHOQ	1443.45	-0.041104	0.0421599	0	1	1	FALSE	Not DE	T1_V_T0
ENSG00000151665.13	PIGF	255.858	0.0984853	0.0395421	0	1	1	FALSE	Not DE	T1_V_T0
ENSG00000119878.6	CRIPT	271.173	0.0898999	0.0446326	0	1	1	FALSE	Not DE	T1_V_T0
ENSG00000222005.9	LINC01118	20.1666	0.273668	0.127517	0.577716	0.563456	1	FALSE	Not DE	T1_V_T0
ENSG00000180398.13	MCFD2	323.033	0.0164965	0.048087	0	1	1	FALSE	Not DE	T1_V_T0
ENSG00000068724.18	TTC7A	1594.84	-0.110791	0.0384891	0	1	1	FALSE	Not DE	T1_V_T0
ENSG00000273269.3	ENSG00000273269	8.61269	0.340868	0.20083	0.701427	0.483036	1	FALSE	Not DE	T1_V_T0
ENSG00000234690.7	EPCAM-DT	7.98775	0.865593	0.237684	2.80033	0.00510504	NA	NA	Not DE	T1_V_T0
ENSG00000095002.15	MSH2	142.641	0.102125	0.0660109	0	1	1	FALSE	Not DE	T1_V_T0
ENSG00000230979.3	ENSG00000230979	47.2765	-0.259236	0.137883	-0.429614	0.667476	1	FALSE	Not DE	T1_V_T0
ENSG00000116062.19	MSH6	249.21	0.0398244	0.0451764	0	1	1	FALSE	Not DE	T1_V_T0
ENSG00000138081.22	FBXO11	1205.95	0.106899	0.0439381	0	1	1	FALSE	Not DE	T1_V_T0
ENSG00000233230.3	ENSG00000233230	23.9583	-0.0701149	0.104752	0	1	1	FALSE	Not DE	T1_V_T0
ENSG00000230773.9	ENSG00000230773	55.5233	0.472472	0.102603	2.65559	0.00791705	0.330285	FALSE	Not DE	T1_V_T0
ENSG00000170802.17	FOXN2	463.858	0.0773885	0.0636798	0	1	1	FALSE	Not DE	T1_V_T0
ENSG00000162869.16	PPP1R21	738.678	0.0114743	0.0394148	0	1	1	FALSE	Not DE	T1_V_T0
ENSG00000068781.21	STON1-GTF2A1L	7.00967	-0.0491356	0.191861	0	1	NA	NA	Not DE	T1_V_T0
ENSG00000282998.1	ENSG00000282998	17.7236	0.0771954	0.191432	0	1	1	FALSE	Not DE	T1_V_T0
ENSG00000282828.2	ENSG00000282828	9.38545	0.107224	0.21515	0	1	1	FALSE	Not DE	T1_V_T0
ENSG00000179915.25	NRXN1	22.9021	0.611198	0.204982	2.00602	0.044854	1	FALSE	Not DE	T1_V_T0
ENSG00000115239.24	ASB3	298.229	0.155275	0.0559273	0	1	1	FALSE	Not DE	T1_V_T0
ENSG00000143942.5	CHAC2	14.722	0.234079	0.146982	0.231857	0.816649	1	FALSE	Not DE	T1_V_T0
ENSG00000068912.15	ERLEC1	296.327	-0.0364954	0.0462561	0	1	1	FALSE	Not DE	T1_V_T0
ENSG00000068878.15	PSME4	982.794	0.19955	0.0504359	0	1	1	FALSE	Not DE	T1_V_T0
ENSG00000170634.13	ACYP2	339.43	0.171254	0.0670187	0	1	1	FALSE	Not DE	T1_V_T0
ENSG00000289065.1	ENSG00000289065	6.92728	0.245361	0.196931	0.23034	0.817827	NA	NA	Not DE	T1_V_T0
ENSG00000115306.16	SPTBN1	755.165	-0.0189439	0.0501206	0	1	1	FALSE	Not DE	T1_V_T0
ENSG00000214595.13	EML6	33.5295	0.312825	0.119579	0.943514	0.345418	1	FALSE	Not DE	T1_V_T0
ENSG00000115310.19	RTN4	2155.26	-0.131474	0.0483043	0	1	1	FALSE	Not DE	T1_V_T0
ENSG00000162994.16	CLHC1	72.2528	0.149433	0.0724157	0	1	1	FALSE	Not DE	T1_V_T0
ENSG00000143947.15	RPS27A	13370.8	-0.00862354	0.0586083	0	1	1	FALSE	Not DE	T1_V_T0
ENSG00000289606.1	ENSG00000289606	11.7029	-0.0861107	0.150914	0	1	1	FALSE	Not DE	T1_V_T0
ENSG00000085760.15	MTIF2	236.855	0.00408224	0.0435847	0	1	1	FALSE	Not DE	T1_V_T0
ENSG00000240401.9	ENSG00000240401	50.1074	-0.297853	0.0790162	-1.23839	0.215571	1	FALSE	Not DE	T1_V_T0
ENSG00000115355.18	CCDC88A	350.606	0.179355	0.0662842	0	1	1	FALSE	Not DE	T1_V_T0
ENSG00000163001.12	CFAP36	202.434	-0.000250227	0.0553052	0	1	1	FALSE	Not DE	T1_V_T0
ENSG00000275052.5	PPP4R3B	977.509	-0.0267264	0.0390578	0	1	1	FALSE	Not DE	T1_V_T0
ENSG00000272606.2	PPP4R3B-DT	21.2418	0.168439	0.117803	0	1	1	FALSE	Not DE	T1_V_T0
ENSG00000138035.15	PNPT1	174.179	-0.0261125	0.0848056	0	1	1	FALSE	Not DE	T1_V_T0
ENSG00000285755.2	ENSG00000285755	6.63012	0.406869	0.218766	0.945615	0.344345	NA	NA	Not DE	T1_V_T0
ENSG00000028116.18	VRK2	239.581	-0.203319	0.0756218	-0.0438857	0.964995	1	FALSE	Not DE	T1_V_T0
ENSG00000287875.1	ENSG00000287875	12.4385	-0.367347	0.154314	-1.08446	0.278162	1	FALSE	Not DE	T1_V_T0
ENSG00000115392.13	FANCL	85.7382	0.00678644	0.072171	0	1	1	FALSE	Not DE	T1_V_T0
ENSG00000233426.3	EIF3FP3	42.7127	-0.0271743	0.0933625	0	1	1	FALSE	Not DE	T1_V_T0
ENSG00000228590.4	MIR4432HG	42.8052	0.280899	0.109679	0.737602	0.460756	1	FALSE	Not DE	T1_V_T0
ENSG00000119866.22	BCL11A	367.596	-0.0437944	0.0646186	0	1	1	FALSE	Not DE	T1_V_T0
ENSG00000115421.13	PAPOLG	302.585	-0.0437847	0.0518168	0	1	1	FALSE	Not DE	T1_V_T0
ENSG00000162924.16	REL	185.531	-0.0867784	0.0802666	0	1	1	FALSE	Not DE	T1_V_T0
ENSG00000162927.14	PUS10	59.7656	0.0789238	0.0781875	0	1	1	FALSE	Not DE	T1_V_T0
ENSG00000162928.9	PEX13	124.979	-0.0854489	0.0578465	0	1	1	FALSE	Not DE	T1_V_T0
ENSG00000162929.14	SANBR	34.1555	0.197424	0.100216	0	1	1	FALSE	Not DE	T1_V_T0
ENSG00000212978.6	C2orf74-DT	39.7913	-0.146318	0.0946714	0	1	1	FALSE	Not DE	T1_V_T0
ENSG00000173209.23	AHSA2P	1431.76	0.145034	0.043576	0	1	1	FALSE	Not DE	T1_V_T0
ENSG00000115464.15	USP34	1784.66	0.128435	0.0417823	0	1	1	FALSE	Not DE	T1_V_T0
ENSG00000270820.8	USP34-DT	63.4601	-0.257433	0.0870805	-0.659534	0.509553	1	FALSE	Not DE	T1_V_T0
ENSG00000082898.19	XPO1	1108.32	-0.0383485	0.0587451	0	1	1	FALSE	Not DE	T1_V_T0
ENSG00000115484.15	CCT4	1066.19	-0.0999141	0.0426539	0	1	1	FALSE	Not DE	T1_V_T0
ENSG00000173163.11	COMMD1	294.244	-0.0159147	0.0550614	0	1	1	FALSE	Not DE	T1_V_T0
ENSG00000170340.11	B3GNT2	220.953	0.112016	0.0719125	0	1	1	FALSE	Not DE	T1_V_T0
ENSG00000228541.3	ENSG00000228541	55.4469	0.125862	0.0996652	0	1	1	FALSE	Not DE	T1_V_T0
ENSG00000115504.15	EHBP1	148.592	0.25493	0.0819607	0.670196	0.502733	1	FALSE	Not DE	T1_V_T0
ENSG00000115507.10	OTX1	38.4368	0.514802	0.154932	2.03188	0.0421663	0.986486	FALSE	Not DE	T1_V_T0
ENSG00000286480.1	ENSG00000286480	7.43484	0.431325	0.289044	0.800309	0.423532	NA	NA	Not DE	T1_V_T0
ENSG00000143951.16	WDPCP	171.265	0.325743	0.0908056	1.38474	0.166131	1	FALSE	Not DE	T1_V_T0
ENSG00000014641.21	MDH1	612.004	-0.098849	0.0540183	0	1	1	FALSE	Not DE	T1_V_T0
ENSG00000169764.16	UGP2	1010.14	-0.124738	0.03884	0	1	1	FALSE	Not DE	T1_V_T0
ENSG00000143952.20	VPS54	307.6	0.0853719	0.0491064	0	1	1	FALSE	Not DE	T1_V_T0
ENSG00000228079.2	ENSG00000228079	10.7561	0.253768	0.157924	0.340467	0.733505	1	FALSE	Not DE	T1_V_T0
ENSG00000197329.12	PELI1	1744.55	0.215097	0.0758546	0.199031	0.842238	1	FALSE	Not DE	T1_V_T0
ENSG00000225889.10	ENSG00000225889	1826.04	0.310299	0.0823913	1.33873	0.180659	1	FALSE	Not DE	T1_V_T0
ENSG00000288932.2	ENSG00000288932	561.756	0.14559	0.0934314	0	1	1	FALSE	Not DE	T1_V_T0
ENSG00000289176.1	ENSG00000289176	81.4369	0.240336	0.113062	0.356757	0.721274	1	FALSE	Not DE	T1_V_T0
ENSG00000119862.13	LGALSL	252.561	0.105513	0.0694658	0	1	1	FALSE	Not DE	T1_V_T0
ENSG00000260101.2	AFTPH-DT	14.6021	-0.0267468	0.13504	0	1	1	FALSE	Not DE	T1_V_T0
ENSG00000119844.17	AFTPH	1077.49	-0.0109192	0.0393668	0	1	1	FALSE	Not DE	T1_V_T0
ENSG00000179833.4	SERTAD2	519.947	0.103581	0.0429333	0	1	1	FALSE	Not DE	T1_V_T0
ENSG00000234572.1	LINC01800	29.5888	0.128776	0.135046	0	1	1	FALSE	Not DE	T1_V_T0
ENSG00000237638.3	LINC02245	135.944	0.058235	0.0778495	0	1	1	FALSE	Not DE	T1_V_T0
ENSG00000115902.11	SLC1A4	178.552	-0.103089	0.0643881	0	1	1	FALSE	Not DE	T1_V_T0
ENSG00000232613.7	LINC02576	7.6938	0.0742535	0.229473	0	1	NA	NA	Not DE	T1_V_T0
ENSG00000011523.15	CEP68	177.633	0.0331033	0.0542488	0	1	1	FALSE	Not DE	T1_V_T0
ENSG00000138069.18	RAB1A	1220.75	-0.0502587	0.0503003	0	1	1	FALSE	Not DE	T1_V_T0
ENSG00000273763.4	ENSG00000273763	23.455	0.187956	0.121371	0	1	1	FALSE	Not DE	T1_V_T0
ENSG00000138071.15	ACTR2	4220.8	-0.00611442	0.0606978	0	1	1	FALSE	Not DE	T1_V_T0
ENSG00000198369.10	SPRED2	31.0169	-0.0911879	0.111309	0	1	1	FALSE	Not DE	T1_V_T0
ENSG00000143995.20	MEIS1	97.6794	0.0200858	0.0738708	0	1	1	FALSE	Not DE	T1_V_T0
ENSG00000143971.9	ETAA1	95.2487	0.0511493	0.0733518	0	1	1	FALSE	Not DE	T1_V_T0
ENSG00000197223.12	C1D	217.917	0.062707	0.0637559	0	1	1	FALSE	Not DE	T1_V_T0
ENSG00000243667.7	DNAAF10	35.8405	0.0792991	0.0867724	0	1	1	FALSE	Not DE	T1_V_T0
ENSG00000273398.6	ENSG00000273398	21.8252	0.364878	0.11152	1.47847	0.139283	1	FALSE	Not DE	T1_V_T0
ENSG00000115946.8	PNO1	95.2172	-0.106376	0.0611143	0	1	1	FALSE	Not DE	T1_V_T0
ENSG00000289156.2	ENSG00000289156	96.0344	0.0794367	0.089413	0	1	1	FALSE	Not DE	T1_V_T0
ENSG00000119865.9	CNRIP1	6.73878	0.384588	0.233943	0.78903	0.430094	NA	NA	Not DE	T1_V_T0
ENSG00000115956.10	PLEK	5284.69	-0.271063	0.0587822	-1.20892	0.226693	1	FALSE	Not DE	T1_V_T0
ENSG00000204923.4	FBXO48	60.5915	-0.017668	0.0721317	0	1	1	FALSE	Not DE	T1_V_T0
ENSG00000169621.11	APLF	59.5519	0.311851	0.0919083	1.21698	0.223611	1	FALSE	Not DE	T1_V_T0
ENSG00000163219.12	ARHGAP25	5974.7	0.0238973	0.0427296	0	1	1	FALSE	Not DE	T1_V_T0
ENSG00000228329.3	LINC01890	13.3986	-0.0399619	0.374388	0	1	1	FALSE	Not DE	T1_V_T0
ENSG00000237576.2	LINC01888	20.3655	-0.0912973	0.118642	0	1	1	FALSE	Not DE	T1_V_T0
ENSG00000198380.13	GFPT1	180.557	0.0597409	0.0531379	0	1	1	FALSE	Not DE	T1_V_T0
ENSG00000169599.13	NFU1	154.073	-0.116029	0.0464162	0	1	1	FALSE	Not DE	T1_V_T0
ENSG00000115977.21	AAK1	1165.76	0.108544	0.0467241	0	1	1	FALSE	Not DE	T1_V_T0
ENSG00000196975.16	ANXA4	413.902	-0.0590539	0.0454101	0	1	1	FALSE	Not DE	T1_V_T0
ENSG00000288869.2	SMANTIS	366.672	-0.188941	0.0741304	0	1	1	FALSE	Not DE	T1_V_T0
ENSG00000087338.5	GMCL1	353.26	0.161606	0.0493746	0	1	1	FALSE	Not DE	T1_V_T0
ENSG00000124380.11	SNRNP27	56.8469	-0.142776	0.0885751	0	1	1	FALSE	Not DE	T1_V_T0
ENSG00000059728.11	MXD1	10228.4	-0.201924	0.0691232	-0.0278276	0.9778	1	FALSE	Not DE	T1_V_T0
ENSG00000179818.17	PCBP1-AS1	1368.37	-0.117416	0.0612235	0	1	1	FALSE	Not DE	T1_V_T0
ENSG00000169564.7	PCBP1	6016.33	-0.0661488	0.0449329	0	1	1	FALSE	Not DE	T1_V_T0
ENSG00000231327.3	LINC01816	7.92097	-0.316234	0.196613	-0.591182	0.554398	NA	NA	Not DE	T1_V_T0
ENSG00000115998.8	C2orf42	194.434	-0.0501223	0.0385161	0	1	1	FALSE	Not DE	T1_V_T0
ENSG00000231414.1	RPL39P15	11.0125	-0.0649779	0.210515	0	1	1	FALSE	Not DE	T1_V_T0
ENSG00000116005.12	PCYOX1	129.579	-0.0223236	0.0584008	0	1	1	FALSE	Not DE	T1_V_T0
ENSG00000143977.14	SNRPG	301.847	-0.110813	0.0505907	0	1	1	FALSE	Not DE	T1_V_T0
ENSG00000035141.9	FAM136A	297.573	0.0768134	0.0464311	0	1	1	FALSE	Not DE	T1_V_T0
ENSG00000163235.16	TGFA	336.373	-0.247672	0.0926599	-0.514479	0.606917	1	FALSE	Not DE	T1_V_T0
ENSG00000075340.23	ADD2	78.2964	-0.141162	0.0811692	0	1	1	FALSE	Not DE	T1_V_T0
ENSG00000152672.8	CLEC4F	83.6967	-0.0621651	0.143479	0	1	1	FALSE	Not DE	T1_V_T0
ENSG00000236469.1	ENSG00000236469	28.0845	-0.130278	0.126384	0	1	1	FALSE	Not DE	T1_V_T0
ENSG00000124357.13	NAGK	5357.65	-0.100273	0.057223	0	1	1	FALSE	Not DE	T1_V_T0
ENSG00000124370.11	MCEE	79.2617	0.134403	0.0684401	0	1	1	FALSE	Not DE	T1_V_T0
ENSG00000124383.11	MPHOSPH10	216.334	-0.0313252	0.0687898	0	1	1	FALSE	Not DE	T1_V_T0
ENSG00000124374.9	PAIP2B	35.0994	0.0280747	0.0974449	0	1	1	FALSE	Not DE	T1_V_T0
ENSG00000075292.19	ZNF638	1536.67	0.0474133	0.0365202	0	1	1	FALSE	Not DE	T1_V_T0
[truncated: 62,062 more rows]

## Sheet: TableS7
Table S7: Overrepresentation results from gprofiler for the top (most significant) 300 differentially expressed up or down genes in the T2, T3 and T4 cohort relative to T0
query	FDR	term_size	query_size	intersection_size	precision	recall	term_id	source	term_name	intersection	Contrast
query_1	1.17497e-77	100	295	68	0.230508	0.68	GO:0019814	GO:CC	immunoglobulin complex	IGHV3-7,IGHV4-39,JCHAIN,IGLV1-40,IGHV3-21,IGLV6-57,IGKV1-5,IGKV2-30,IGHA1,IGHV3-15,IGLV3-1,IGLV2-14,IGHV6-1,IGKV3-15,IGLV1-47,IGKV4-1,IGLV3-19,IGHV3-33,IGLV2-8,IGKV1-16,IGHV3-23,IGLV3-21,IGHV4-59,IGLV1-44,IGKV2D-29,IGHA2,IGHV1-18,IGHV4-4,IGLV2-23,IGHG2,IGHV3-74,IGLV3-25,IGLC2,IGHV1-2,IGHV5-51,IGLV3-10,IGHV4-61,IGKV3-20,IGHG1,IGLV2-11,IGKV3-11,IGHV1-46,IGKV1-12,IGKV1-39,IGHV2-70,IGLV4-69,IGHV3-30,…	T0_V_T2_down
query_1	3.59151e-63	1433	286	152	0.531469	0.106071	GO:0006955	GO:BP	immune response	C1QC,CD274,PDCD1LG2,CD177,SERPING1,AIM2,IGHV3-7,GBP6,FCGR1A,IGHV4-39,TIFA,GBP5,GBP1,JCHAIN,IGLV1-40,IGHV3-21,IGLV6-57,IGKV1-5,DUSP3,LIMK1,IGKV2-30,SOCS3,IGHA1,IGHV3-15,IGLV3-1,IL27,IGLV2-14,CEACAM1,IGHV6-1,IGKV3-15,IGLV1-47,IGKV4-1,IGLV3-19,IGHV3-33,IGLV2-8,IGKV1-16,IGHV3-23,IGLV3-21,IGHV4-59,IGLV1-44,IGKV2D-29,SLAMF8,ANXA3,IGHA2,TAP1,TLR5,IGHV1-18,IGHV4-4,GBP3,IGLV2-23,RHBDF2,H2BC12,IGHG2,IGHV3-…	T0_V_T2_down
query_1	6.09459e-58	2031	295	172	0.583051	0.0846873	GO:0002376	GO:BP	immune system process	C1QC,CD274,PDCD1LG2,CD177,SERPING1,AIM2,IGHV3-7,GBP6,FCGR1A,IGHV4-39,TIFA,BATF2,GBP5,GBP1,JCHAIN,IGLV1-40,IGHV3-21,IGLV6-57,IGKV1-5,DUSP3,LIMK1,IGKV2-30,SOCS3,IGHA1,IGHV3-15,IGLV3-1,SMARCD3,IL27,IGLV2-14,CEACAM1,IGHV6-1,IGKV3-15,IGLV1-47,IGKV4-1,IGLV3-19,IGHV3-33,IGLV2-8,IGKV1-16,IGHV3-23,IGLV3-21,IGHV4-59,IGLV1-44,IGKV2D-29,SLAMF8,ANXA3,IGHA2,TAP1,TLR5,IGHV1-18,IGHV4-4,GBP3,IGLV2-23,TNFAIP6,RHBD…	T0_V_T2_down
query_1	3.31278e-56	57	295	43	0.145763	0.754386	REAC:R-HSA-2168880	REAC	Scavenging of heme from plasma	IGHV3-7,IGHV4-39,JCHAIN,IGLV1-40,IGLV6-57,IGKV1-5,IGKV2-30,IGHA1,IGLV3-1,IGLV2-14,IGKV3-15,IGLV1-47,IGKV4-1,IGLV3-19,IGHV3-33,IGLV2-8,IGKV1-16,IGHV3-23,IGLV3-21,IGHV4-59,IGLV1-44,IGHA2,IGLV2-23,APOL1,IGLV3-25,IGLC2,IGHV1-2,IGKV3-20,IGLV2-11,IGKV3-11,IGHV1-46,IGKV1-12,IGKV1-39,IGHV2-70,IGHV3-30,IGKV3D-20,IGHV2-5,IGLC3,IGLV7-43,HP,IGHV3-11,IGHV3-48,IGHV3-13	T0_V_T2_down
query_1	7.15603e-56	51	295	41	0.138983	0.803922	REAC:R-HSA-173623	REAC	Classical antibody-mediated complement activation	C1QC,IGHV3-7,IGHV4-39,IGLV1-40,IGLV6-57,IGKV1-5,IGKV2-30,IGLV3-1,IGLV2-14,IGKV3-15,IGLV1-47,IGKV4-1,IGLV3-19,IGHV3-33,IGLV2-8,IGKV1-16,IGHV3-23,IGLV3-21,IGHV4-59,IGLV1-44,IGLV2-23,IGHG2,IGLV3-25,IGLC2,IGHV1-2,IGKV3-20,IGHG1,IGLV2-11,IGKV3-11,IGHV1-46,IGKV1-12,IGKV1-39,IGHV2-70,IGHV3-30,IGKV3D-20,IGHV2-5,IGLC3,IGLV7-43,IGHV3-11,IGHV3-48,IGHV3-13	T0_V_T2_down
query_1	1.78526e-55	59	295	42	0.142373	0.711864	REAC:R-HSA-2029481	REAC	FCGR activation	IGHV3-7,FCGR1A,IGHV4-39,IGLV1-40,IGLV6-57,IGKV1-5,IGKV2-30,IGLV3-1,IGLV2-14,IGKV3-15,IGLV1-47,IGKV4-1,IGLV3-19,IGHV3-33,IGLV2-8,IGKV1-16,IGHV3-23,IGLV3-21,IGHV4-59,IGLV1-44,IGLV2-23,IGHG2,IGLV3-25,IGLC2,IGHV1-2,IGKV3-20,IGHG1,IGLV2-11,IGKV3-11,IGHV1-46,IGKV1-12,IGKV1-39,IGHV2-70,IGHV3-30,IGKV3D-20,IGHV2-5,IGLC3,IGLV7-43,FCGR2A,IGHV3-11,IGHV3-48,IGHV3-13	T0_V_T2_down
query_1	4.21477e-55	541	286	95	0.332168	0.175601	GO:0002250	GO:BP	adaptive immune response	C1QC,CD274,PDCD1LG2,SERPING1,IGHV3-7,FCGR1A,IGHV4-39,JCHAIN,IGLV1-40,IGHV3-21,IGLV6-57,IGKV1-5,IGKV2-30,SOCS3,IGHA1,IGHV3-15,IGLV3-1,IL27,IGLV2-14,CEACAM1,IGHV6-1,IGKV3-15,IGLV1-47,IGKV4-1,IGLV3-19,IGHV3-33,IGLV2-8,IGKV1-16,IGHV3-23,IGLV3-21,IGHV4-59,IGLV1-44,IGKV2D-29,IGHA2,TAP1,IGHV1-18,IGHV4-4,IGLV2-23,IGHG2,IGHV3-74,IGLV3-25,IGLC2,ICAM1,IGHV1-2,IGHV5-51,IL1B,IGLV3-10,IGHV4-61,IGKV3-20,IGHG1,I…	T0_V_T2_down
query_1	8.48659e-55	124	295	57	0.19322	0.459677	GO:0003823	GO:MF	antigen binding	IGHV3-7,IGHV4-39,JCHAIN,IGLV1-40,IGHV3-21,IGLV6-57,IGKV1-5,IGKV2-30,IGHA1,IGHV3-15,IGLV3-1,IGLV2-14,IGHV6-1,IGKV3-15,IGLV1-47,IGKV4-1,IGLV3-19,IGHV3-33,IGLV2-8,IGKV1-16,IGHV3-23,IGLV3-21,IGHV4-59,IGLV1-44,IGHA2,TAP1,IGHV1-18,IGHV4-4,IGLV2-23,IGHG2,IGHV3-74,IGLV3-25,IGLC2,IGHV1-2,IGHV5-51,IGHV4-61,IGKV3-20,IGHG1,IGLV2-11,IGKV3-11,IGHV1-46,IGKV1-39,IGHV2-70,TAPBP,HLA-DPA1,IGHV3-30,IGHV2-5,IGLC3,HLA…	T0_V_T2_down
query_1	3.52253e-53	52	295	41	0.138983	0.788462	REAC:R-HSA-166786	REAC	Creation of C4 and C2 activators	C1QC,IGHV3-7,IGHV4-39,IGLV1-40,IGLV6-57,IGKV1-5,IGKV2-30,IGLV3-1,IGLV2-14,IGKV3-15,IGLV1-47,IGKV4-1,IGLV3-19,IGHV3-33,IGLV2-8,IGKV1-16,IGHV3-23,IGLV3-21,IGHV4-59,IGLV1-44,IGLV2-23,IGHG2,IGLV3-25,IGLC2,IGHV1-2,IGKV3-20,IGHG1,IGLV2-11,IGKV3-11,IGHV1-46,IGKV1-12,IGKV1-39,IGHV2-70,IGHV3-30,IGKV3D-20,IGHV2-5,IGLC3,IGLV7-43,IGHV3-11,IGHV3-48,IGHV3-13	T0_V_T2_down
query_1	1.4236e-51	71	295	45	0.152542	0.633803	REAC:R-HSA-2173782	REAC	Binding and Uptake of Ligands by Scavenger Receptors	IGHV3-7,SCARF1,IGHV4-39,JCHAIN,IGLV1-40,IGLV6-57,IGKV1-5,IGKV2-30,IGHA1,IGLV3-1,IGLV2-14,IGKV3-15,IGLV1-47,IGKV4-1,IGLV3-19,IGHV3-33,IGLV2-8,IGKV1-16,IGHV3-23,IGLV3-21,IGHV4-59,IGLV1-44,IGHA2,IGLV2-23,APOL1,IGLV3-25,IGLC2,IGHV1-2,IGKV3-20,IGLV2-11,IGKV3-11,IGHV1-46,IGKV1-12,IGKV1-39,IGHV2-70,IGHV3-30,IGKV3D-20,MARCO,IGHV2-5,IGLC3,IGLV7-43,HP,IGHV3-11,IGHV3-48,IGHV3-13	T0_V_T2_down
query_1	8.77994e-51	71	295	42	0.142373	0.591549	REAC:R-HSA-2029485	REAC	Role of phospholipids in phagocytosis	IGHV3-7,FCGR1A,IGHV4-39,IGLV1-40,IGLV6-57,IGKV1-5,IGKV2-30,IGLV3-1,IGLV2-14,IGKV3-15,IGLV1-47,IGKV4-1,IGLV3-19,IGHV3-33,IGLV2-8,IGKV1-16,IGHV3-23,IGLV3-21,IGHV4-59,IGLV1-44,IGLV2-23,IGHG2,IGLV3-25,IGLC2,IGHV1-2,IGKV3-20,IGHG1,IGLV2-11,IGKV3-11,IGHV1-46,IGKV1-12,IGKV1-39,IGHV2-70,IGHV3-30,IGKV3D-20,IGHV2-5,IGLC3,IGLV7-43,FCGR2A,IGHV3-11,IGHV3-48,IGHV3-13	T0_V_T2_down
query_1	1.2538e-50	57	295	41	0.138983	0.719298	REAC:R-HSA-166663	REAC	Initial triggering of complement	C1QC,IGHV3-7,IGHV4-39,IGLV1-40,IGLV6-57,IGKV1-5,IGKV2-30,IGLV3-1,IGLV2-14,IGKV3-15,IGLV1-47,IGKV4-1,IGLV3-19,IGHV3-33,IGLV2-8,IGKV1-16,IGHV3-23,IGLV3-21,IGHV4-59,IGLV1-44,IGLV2-23,IGHG2,IGLV3-25,IGLC2,IGHV1-2,IGKV3-20,IGHG1,IGLV2-11,IGKV3-11,IGHV1-46,IGKV1-12,IGKV1-39,IGHV2-70,IGHV3-30,IGKV3D-20,IGHV2-5,IGLC3,IGLV7-43,IGHV3-11,IGHV3-48,IGHV3-13	T0_V_T2_down
query_1	1.2538e-50	52	295	38	0.128814	0.730769	REAC:R-HSA-5690714	REAC	CD22 mediated BCR regulation	IGHV3-7,IGHV4-39,IGLV1-40,IGLV6-57,IGKV1-5,IGKV2-30,IGLV3-1,IGLV2-14,IGKV3-15,IGLV1-47,IGKV4-1,IGLV3-19,IGHV3-33,IGLV2-8,IGKV1-16,IGHV3-23,IGLV3-21,IGHV4-59,IGLV1-44,IGLV2-23,IGLV3-25,IGLC2,IGHV1-2,IGKV3-20,IGLV2-11,IGKV3-11,IGHV1-46,IGKV1-12,IGKV1-39,IGHV2-70,IGHV3-30,IGKV3D-20,IGHV2-5,IGLC3,IGLV7-43,IGHV3-11,IGHV3-48,IGHV3-13	T0_V_T2_down
query_1	2.3199e-49	79	295	43	0.145763	0.544304	REAC:R-HSA-9664323	REAC	FCGR3A-mediated IL10 synthesis	IGHV3-7,FCGR1A,IGHV4-39,IGLV1-40,IGLV6-57,IGKV1-5,IGKV2-30,IGLV3-1,IGLV2-14,IGKV3-15,IGLV1-47,IGKV4-1,IGLV3-19,IGHV3-33,IGLV2-8,IGKV1-16,IGHV3-23,IGLV3-21,IGHV4-59,IGLV1-44,IGLV2-23,IGHG2,IGLV3-25,IGLC2,ADCY3,IGHV1-2,IGKV3-20,IGHG1,IGLV2-11,IGKV3-11,IGHV1-46,IGKV1-12,IGKV1-39,IGHV2-70,IGHV3-30,IGKV3D-20,IGHV2-5,IGLC3,IGLV7-43,FCGR2A,IGHV3-11,IGHV3-48,IGHV3-13	T0_V_T2_down
query_1	2.74441e-49	60	295	39	0.132203	0.65	REAC:R-HSA-2730905	REAC	Role of LAT2/NTAL/LAB on calcium mobilization	IGHV3-7,IGHV4-39,IGLV1-40,IGLV6-57,IGKV1-5,IGKV2-30,IGLV3-1,IGLV2-14,IGKV3-15,IGLV1-47,IGKV4-1,IGLV3-19,IGHV3-33,IGLV2-8,IGKV1-16,IGHV3-23,IGLV3-21,IGHV4-59,IGLV1-44,IGLV2-23,IGLV3-25,IGLC2,IGHV1-2,IGKV3-20,IGLV2-11,IGKV3-11,IGHV1-46,IGKV1-12,IGKV1-39,FCER1G,IGHV2-70,IGHV3-30,IGKV3D-20,IGHV2-5,IGLC3,IGLV7-43,IGHV3-11,IGHV3-48,IGHV3-13	T0_V_T2_down
query_1	3.60844e-46	70	199	38	0.190955	0.542857	REAC:R-HSA-977606	REAC	Regulation of Complement cascade	C1QC,SERPING1,IGHV3-7,IGHV4-39,IGLV1-40,IGLV6-57,IGKV1-5,IGKV2-30,IGLV3-1,IGLV2-14,IGKV3-15,IGLV1-47,IGKV4-1,IGLV3-19,IGHV3-33,IGLV2-8,IGKV1-16,IGHV3-23,IGLV3-21,IGHV4-59,IGLV1-44,IGLV2-23,IGHG2,IGLV3-25,IGLC2,IGHV1-2,IGKV3-20,IGHG1,IGLV2-11,IGKV3-11,IGHV1-46,IGKV1-12,IGKV1-39,IGHV2-70,IGHV3-30,IGKV3D-20,IGHV2-5,IGLC3	T0_V_T2_down
query_1	3.94413e-45	74	295	39	0.132203	0.527027	REAC:R-HSA-2871809	REAC	FCERI mediated Ca+2 mobilization	IGHV3-7,IGHV4-39,IGLV1-40,IGLV6-57,IGKV1-5,IGKV2-30,IGLV3-1,IGLV2-14,IGKV3-15,IGLV1-47,IGKV4-1,IGLV3-19,IGHV3-33,IGLV2-8,IGKV1-16,IGHV3-23,IGLV3-21,IGHV4-59,IGLV1-44,IGLV2-23,IGLV3-25,IGLC2,IGHV1-2,IGKV3-20,IGLV2-11,IGKV3-11,IGHV1-46,IGKV1-12,IGKV1-39,FCER1G,IGHV2-70,IGHV3-30,IGKV3D-20,IGHV2-5,IGLC3,IGLV7-43,IGHV3-11,IGHV3-48,IGHV3-13	T0_V_T2_down
query_1	3.94413e-45	74	295	39	0.132203	0.527027	REAC:R-HSA-2871796	REAC	FCERI mediated MAPK activation	IGHV3-7,IGHV4-39,IGLV1-40,IGLV6-57,IGKV1-5,IGKV2-30,IGLV3-1,IGLV2-14,IGKV3-15,IGLV1-47,IGKV4-1,IGLV3-19,IGHV3-33,IGLV2-8,IGKV1-16,IGHV3-23,IGLV3-21,IGHV4-59,IGLV1-44,IGLV2-23,IGLV3-25,IGLC2,IGHV1-2,IGKV3-20,IGLV2-11,IGKV3-11,IGHV1-46,IGKV1-12,IGKV1-39,FCER1G,IGHV2-70,IGHV3-30,IGKV3D-20,IGHV2-5,IGLC3,IGLV7-43,IGHV3-11,IGHV3-48,IGHV3-13	T0_V_T2_down
query_1	6.73555e-45	76	295	39	0.132203	0.513158	REAC:R-HSA-983695	REAC	Antigen activates B Cell Receptor (BCR) leading to generation of second messengers	IGHV3-7,IGHV4-39,IGLV1-40,IGLV6-57,IGKV1-5,IGKV2-30,IGLV3-1,IGLV2-14,IGKV3-15,IGLV1-47,IGKV4-1,IGLV3-19,IGHV3-33,IGLV2-8,IGKV1-16,IGHV3-23,IGLV3-21,IGHV4-59,IGLV1-44,IGLV2-23,IGLV3-25,IGLC2,IGHV1-2,IGKV3-20,IGLV2-11,IGKV3-11,IGHV1-46,IGKV1-12,IGKV1-39,IGHV2-70,IGHV3-30,IGKV3D-20,IGHV2-5,IGLC3,PIK3AP1,IGLV7-43,IGHV3-11,IGHV3-48,IGHV3-13	T0_V_T2_down
query_1	1.18728e-44	107	295	45	0.152542	0.420561	REAC:R-HSA-9664433	REAC	Leishmania parasite growth and survival	IGHV3-7,FCGR1A,IGHV4-39,IGLV1-40,IGLV6-57,IGKV1-5,IGKV2-30,IGLV3-1,IGLV2-14,IGKV3-15,IGLV1-47,IGKV4-1,IGLV3-19,IGHV3-33,IGLV2-8,IGKV1-16,IGHV3-23,IGLV3-21,IGHV4-59,IGLV1-44,IGLV2-23,RHBDF2,IGHG2,IGLV3-25,IGLC2,ADCY3,IGHV1-2,IGKV3-20,IGHG1,IGLV2-11,IGKV3-11,IGHV1-46,IGKV1-12,IGKV1-39,IGHV2-70,IGHV3-30,IGKV3D-20,IGHV2-5,IGLC3,MAPK14,IGLV7-43,FCGR2A,IGHV3-11,IGHV3-48,IGHV3-13	T0_V_T2_down
query_1	1.18728e-44	107	295	45	0.152542	0.420561	REAC:R-HSA-9662851	REAC	Anti-inflammatory response favouring Leishmania parasite infection	IGHV3-7,FCGR1A,IGHV4-39,IGLV1-40,IGLV6-57,IGKV1-5,IGKV2-30,IGLV3-1,IGLV2-14,IGKV3-15,IGLV1-47,IGKV4-1,IGLV3-19,IGHV3-33,IGLV2-8,IGKV1-16,IGHV3-23,IGLV3-21,IGHV4-59,IGLV1-44,IGLV2-23,RHBDF2,IGHG2,IGLV3-25,IGLC2,ADCY3,IGHV1-2,IGKV3-20,IGHG1,IGLV2-11,IGKV3-11,IGHV1-46,IGKV1-12,IGKV1-39,IGHV2-70,IGHV3-30,IGKV3D-20,IGHV2-5,IGLC3,MAPK14,IGLV7-43,FCGR2A,IGHV3-11,IGHV3-48,IGHV3-13	T0_V_T2_down
query_1	1.66621e-44	73	199	38	0.190955	0.520548	REAC:R-HSA-166658	REAC	Complement cascade	C1QC,SERPING1,IGHV3-7,IGHV4-39,IGLV1-40,IGLV6-57,IGKV1-5,IGKV2-30,IGLV3-1,IGLV2-14,IGKV3-15,IGLV1-47,IGKV4-1,IGLV3-19,IGHV3-33,IGLV2-8,IGKV1-16,IGHV3-23,IGLV3-21,IGHV4-59,IGLV1-44,IGLV2-23,IGHG2,IGLV3-25,IGLC2,IGHV1-2,IGKV3-20,IGHG1,IGLV2-11,IGKV3-11,IGHV1-46,IGKV1-12,IGKV1-39,IGHV2-70,IGHV3-30,IGKV3D-20,IGHV2-5,IGLC3	T0_V_T2_down
query_1	1.66621e-44	105	295	43	0.145763	0.409524	REAC:R-HSA-2029482	REAC	Regulation of actin dynamics for phagocytic cup formation	IGHV3-7,FCGR1A,IGHV4-39,IGLV1-40,IGLV6-57,IGKV1-5,LIMK1,IGKV2-30,IGLV3-1,IGLV2-14,IGKV3-15,IGLV1-47,IGKV4-1,IGLV3-19,IGHV3-33,IGLV2-8,IGKV1-16,IGHV3-23,IGLV3-21,IGHV4-59,IGLV1-44,IGLV2-23,IGHG2,IGLV3-25,IGLC2,IGHV1-2,IGKV3-20,IGHG1,IGLV2-11,IGKV3-11,IGHV1-46,IGKV1-12,IGKV1-39,IGHV2-70,IGHV3-30,IGKV3D-20,IGHV2-5,IGLC3,IGLV7-43,FCGR2A,IGHV3-11,IGHV3-48,IGHV3-13	T0_V_T2_down
query_1	1.23814e-43	148	169	42	0.248521	0.283784	REAC:R-HSA-202733	REAC	Cell surface interactions at the vascular wall	CD177,IGHV3-7,IGHV4-39,SDC3,JCHAIN,IGLV1-40,IGLV6-57,IGKV1-5,IGKV2-30,IGHA1,IGLV3-1,IGLV2-14,CEACAM1,IGKV3-15,IGLV1-47,IGKV4-1,IGLV3-19,IGHV3-33,IGLV2-8,IGKV1-16,IGHV3-23,SDC1,IGLV3-21,IGHV4-59,IGLV1-44,IGHA2,IGLV2-23,IGLV3-25,IGLC2,IGHV1-2,IGKV3-20,IGLV2-11,SELL,IGKV3-11,IGHV1-46,GAS6,IGKV1-12,IGKV1-39,FCER1G,IGHV2-70,IGHV3-30,IGKV3D-20	T0_V_T2_down
query_1	7.7607e-41	102	199	36	0.180905	0.352941	REAC:R-HSA-9664417	REAC	Leishmania phagocytosis	IGHV3-7,IGHV4-39,IGLV1-40,IGLV6-57,IGKV1-5,IGKV2-30,IGLV3-1,IGLV2-14,IGKV3-15,IGLV1-47,IGKV4-1,IGLV3-19,IGHV3-33,IGLV2-8,IGKV1-16,IGHV3-23,IGLV3-21,IGHV4-59,IGLV1-44,IGLV2-23,IGHG2,IGLV3-25,IGLC2,IGHV1-2,IGKV3-20,IGHG1,IGLV2-11,IGKV3-11,IGHV1-46,IGKV1-12,IGKV1-39,IGHV2-70,IGHV3-30,IGKV3D-20,IGHV2-5,IGLC3	T0_V_T2_down
query_1	7.7607e-41	102	199	36	0.180905	0.352941	REAC:R-HSA-9664422	REAC	FCGR3A-mediated phagocytosis	IGHV3-7,IGHV4-39,IGLV1-40,IGLV6-57,IGKV1-5,IGKV2-30,IGLV3-1,IGLV2-14,IGKV3-15,IGLV1-47,IGKV4-1,IGLV3-19,IGHV3-33,IGLV2-8,IGKV1-16,IGHV3-23,IGLV3-21,IGHV4-59,IGLV1-44,IGLV2-23,IGHG2,IGLV3-25,IGLC2,IGHV1-2,IGKV3-20,IGHG1,IGLV2-11,IGKV3-11,IGHV1-46,IGKV1-12,IGKV1-39,IGHV2-70,IGHV3-30,IGKV3D-20,IGHV2-5,IGLC3	T0_V_T2_down
query_1	7.7607e-41	102	199	36	0.180905	0.352941	REAC:R-HSA-9664407	REAC	Parasite infection	IGHV3-7,IGHV4-39,IGLV1-40,IGLV6-57,IGKV1-5,IGKV2-30,IGLV3-1,IGLV2-14,IGKV3-15,IGLV1-47,IGKV4-1,IGLV3-19,IGHV3-33,IGLV2-8,IGKV1-16,IGHV3-23,IGLV3-21,IGHV4-59,IGLV1-44,IGLV2-23,IGHG2,IGLV3-25,IGLC2,IGHV1-2,IGKV3-20,IGHG1,IGLV2-11,IGKV3-11,IGHV1-46,IGKV1-12,IGKV1-39,IGHV2-70,IGHV3-30,IGKV3D-20,IGHV2-5,IGLC3	T0_V_T2_down
query_1	1.67371e-40	127	295	43	0.145763	0.338583	REAC:R-HSA-2029480	REAC	Fcgamma receptor (FCGR) dependent phagocytosis	IGHV3-7,FCGR1A,IGHV4-39,IGLV1-40,IGLV6-57,IGKV1-5,LIMK1,IGKV2-30,IGLV3-1,IGLV2-14,IGKV3-15,IGLV1-47,IGKV4-1,IGLV3-19,IGHV3-33,IGLV2-8,IGKV1-16,IGHV3-23,IGLV3-21,IGHV4-59,IGLV1-44,IGLV2-23,IGHG2,IGLV3-25,IGLC2,IGHV1-2,IGKV3-20,IGHG1,IGLV2-11,IGKV3-11,IGHV1-46,IGKV1-12,IGKV1-39,IGHV2-70,IGHV3-30,IGKV3D-20,IGHV2-5,IGLC3,IGLV7-43,FCGR2A,IGHV3-11,IGHV3-48,IGHV3-13	T0_V_T2_down
query_1	3.22835e-39	151	295	46	0.155932	0.304636	REAC:R-HSA-198933	REAC	Immunoregulatory interactions between a Lymphoid and a non-Lymphoid cell	IGHV3-7,FCGR1A,IGHV4-39,IGLV1-40,IGLV6-57,IGKV1-5,IGKV2-30,IGLV3-1,IGLV2-14,IGKV3-15,IGLV1-47,IGKV4-1,IGLV3-19,IGHV3-33,IGLV2-8,IGKV1-16,IGHV3-23,IGLV3-21,IGHV4-59,IGLV1-44,IGLV2-23,IGLV3-25,IGLC2,ICAM1,IGHV1-2,IGKV3-20,IGLV2-11,SELL,IGKV3-11,IGHV1-46,IGKV1-12,IGKV1-39,IGHV2-70,IGHV3-30,IGKV3D-20,LILRA6,IGHV2-5,NECTIN2,IGLC3,SLAMF7,HLA-E,IGLV7-43,IGHV3-11,LILRB4,IGHV3-48,IGHV3-13	T0_V_T2_down
query_1	1.28103e-37	1616	295	124	0.420339	0.0767327	REAC:R-HSA-168256	REAC	Immune System	C1QC,CD274,PDCD1LG2,CD177,SERPING1,AIM2,IGHV3-7,GBP6,FCGR1A,IGHV4-39,TIFA,GBP5,GBP1,IGLV1-40,IGLV6-57,IGKV1-5,DUSP3,LIMK1,IGKV2-30,SOCS3,GPR84,LMNB1,IGLV3-1,IL27,IGLV2-14,CEACAM1,IGKV3-15,IGLV1-47,IGKV4-1,IGLV3-19,IGHV3-33,IGLV2-8,IGKV1-16,IGHV3-23,SDC1,IGLV3-21,IGHV4-59,IGLV1-44,TRIM69,TAP1,TLR5,GBP3,IGLV2-23,FBXO6,TNFAIP6,IGHG2,IGLV3-25,IGLC2,ICAM1,TRIM22,MCEMP1,OSM,IGHV1-2,IL1B,IGKV3-20,IGHG1,…	T0_V_T2_down
query_1	3.77984e-37	182	240	44	0.183333	0.241758	REAC:R-HSA-9658195	REAC	Leishmania infection	IGHV3-7,FCGR1A,IGHV4-39,IGLV1-40,IGLV6-57,IGKV1-5,IGKV2-30,IGLV3-1,IGLV2-14,IGKV3-15,IGLV1-47,IGKV4-1,IGLV3-19,IGHV3-33,IGLV2-8,IGKV1-16,IGHV3-23,IGLV3-21,IGHV4-59,IGLV1-44,IGLV2-23,RHBDF2,IGHG2,IGLV3-25,IGLC2,ADCY3,IGHV1-2,IL1B,IGKV3-20,IGHG1,IGLV2-11,IGKV3-11,IGHV1-46,IGKV1-12,IGKV1-39,IGHV2-70,IGHV3-30,IGKV3D-20,CASP1,IGHV2-5,IGLC3,MAPK14,IGLV7-43,FCGR2A	T0_V_T2_down
query_1	3.77984e-37	182	240	44	0.183333	0.241758	REAC:R-HSA-9824443	REAC	Parasitic Infection Pathways	IGHV3-7,FCGR1A,IGHV4-39,IGLV1-40,IGLV6-57,IGKV1-5,IGKV2-30,IGLV3-1,IGLV2-14,IGKV3-15,IGLV1-47,IGKV4-1,IGLV3-19,IGHV3-33,IGLV2-8,IGKV1-16,IGHV3-23,IGLV3-21,IGHV4-59,IGLV1-44,IGLV2-23,RHBDF2,IGHG2,IGLV3-25,IGLC2,ADCY3,IGHV1-2,IL1B,IGKV3-20,IGHG1,IGLV2-11,IGKV3-11,IGHV1-46,IGKV1-12,IGKV1-39,IGHV2-70,IGHV3-30,IGKV3D-20,CASP1,IGHV2-5,IGLC3,MAPK14,IGLV7-43,FCGR2A	T0_V_T2_down
query_1	7.96413e-37	122	295	40	0.135593	0.327869	REAC:R-HSA-2871837	REAC	FCERI mediated NF-kB activation	IGHV3-7,IGHV4-39,IGLV1-40,IGLV6-57,IGKV1-5,IGKV2-30,IGLV3-1,IGLV2-14,IGKV3-15,IGLV1-47,IGKV4-1,IGLV3-19,IGHV3-33,IGLV2-8,IGKV1-16,IGHV3-23,IGLV3-21,IGHV4-59,IGLV1-44,IGLV2-23,IGLV3-25,IGLC2,IGHV1-2,IGKV3-20,IGLV2-11,IGKV3-11,IGHV1-46,IGKV1-12,IGKV1-39,FCER1G,IGHV2-70,IGHV3-30,IGKV3D-20,IGHV2-5,IGLC3,IGLV7-43,IGHV3-11,IGHV3-48,PSMB8,IGHV3-13	T0_V_T2_down
query_1	2.30156e-33	148	295	40	0.135593	0.27027	REAC:R-HSA-983705	REAC	Signaling by the B Cell Receptor (BCR)	IGHV3-7,IGHV4-39,IGLV1-40,IGLV6-57,IGKV1-5,IGKV2-30,IGLV3-1,IGLV2-14,IGKV3-15,IGLV1-47,IGKV4-1,IGLV3-19,IGHV3-33,IGLV2-8,IGKV1-16,IGHV3-23,IGLV3-21,IGHV4-59,IGLV1-44,IGLV2-23,IGLV3-25,IGLC2,IGHV1-2,IGKV3-20,IGLV2-11,IGKV3-11,IGHV1-46,IGKV1-12,IGKV1-39,IGHV2-70,IGHV3-30,IGKV3D-20,IGHV2-5,IGLC3,PIK3AP1,IGLV7-43,IGHV3-11,IGHV3-48,PSMB8,IGHV3-13	T0_V_T2_down
query_1	5.70039e-33	130	199	34	0.170854	0.261538	REAC:R-HSA-9679191	REAC	Potential therapeutics for SARS	IGHV3-7,IGHV4-39,IGLV1-40,IGLV6-57,IGKV1-5,IGKV2-30,IGLV3-1,IGLV2-14,IGKV3-15,IGLV1-47,IGKV4-1,IGLV3-19,IGHV3-33,IGLV2-8,IGKV1-16,IGHV3-23,IGLV3-21,IGHV4-59,IGLV1-44,IGLV2-23,IGLV3-25,IGLC2,IGHV1-2,IGKV3-20,IGLV2-11,IGKV3-11,IGHV1-46,IGKV1-12,IGKV1-39,IGHV2-70,IGHV3-30,IGKV3D-20,IGHV2-5,IGLC3	T0_V_T2_down
query_1	2.41404e-31	165	295	40	0.135593	0.242424	REAC:R-HSA-2454202	REAC	Fc epsilon receptor (FCERI) signaling	IGHV3-7,IGHV4-39,IGLV1-40,IGLV6-57,IGKV1-5,IGKV2-30,IGLV3-1,IGLV2-14,IGKV3-15,IGLV1-47,IGKV4-1,IGLV3-19,IGHV3-33,IGLV2-8,IGKV1-16,IGHV3-23,IGLV3-21,IGHV4-59,IGLV1-44,IGLV2-23,IGLV3-25,IGLC2,IGHV1-2,IGKV3-20,IGLV2-11,IGKV3-11,IGHV1-46,IGKV1-12,IGKV1-39,FCER1G,IGHV2-70,IGHV3-30,IGKV3D-20,IGHV2-5,IGLC3,IGLV7-43,IGHV3-11,IGHV3-48,PSMB8,IGHV3-13	T0_V_T2_down
query_1	1.86899e-30	869	240	75	0.3125	0.0863061	REAC:R-HSA-168249	REAC	Innate Immune System	C1QC,CD177,SERPING1,AIM2,IGHV3-7,FCGR1A,IGHV4-39,TIFA,IGLV1-40,IGLV6-57,IGKV1-5,DUSP3,LIMK1,IGKV2-30,GPR84,IGLV3-1,IGLV2-14,CEACAM1,IGKV3-15,IGLV1-47,IGKV4-1,IGLV3-19,IGHV3-33,IGLV2-8,IGKV1-16,IGHV3-23,IGLV3-21,IGHV4-59,IGLV1-44,TLR5,IGLV2-23,TNFAIP6,IGHG2,IGLV3-25,IGLC2,MCEMP1,IGHV1-2,IL1B,IGKV3-20,IGHG1,HPSE,UBE2L6,IGLV2-11,SELL,IGKV3-11,IGHV1-46,GYG1,IGKV1-12,IGKV1-39,SIGLEC14,LTA4H,FCER1G,IGH…	T0_V_T2_down
query_1	1.75192e-26	141	295	39	0.132203	0.276596	GO:0016064	GO:BP	immunoglobulin mediated immune response	C1QC,SERPING1,IGHV3-7,FCGR1A,IGHV4-39,IGHV3-21,IGHA1,IGHV3-15,IGHV6-1,IGHV3-33,IGHV3-23,IGHV4-59,IGHA2,IGHV1-18,IGHV4-4,IGHG2,IGHV3-74,IGLC2,IGHV1-2,IGHV5-51,IGHV4-61,IGHG1,IGHV1-46,FCER1G,IGHV2-70,IGHV3-30,IGHV2-5,NECTIN2,IGLC3,NOD2,HLA-E,NBN,IGHV3-66,IGHV3-73,IGHV5-10-1,BCL6,IGHV3-11,IGHV3-48,IGHV3-13	T0_V_T2_down
query_1	2.51516e-26	144	295	39	0.132203	0.270833	GO:0019724	GO:BP	B cell mediated immunity	C1QC,SERPING1,IGHV3-7,FCGR1A,IGHV4-39,IGHV3-21,IGHA1,IGHV3-15,IGHV6-1,IGHV3-33,IGHV3-23,IGHV4-59,IGHA2,IGHV1-18,IGHV4-4,IGHG2,IGHV3-74,IGLC2,IGHV1-2,IGHV5-51,IGHV4-61,IGHG1,IGHV1-46,FCER1G,IGHV2-70,IGHV3-30,IGHV2-5,NECTIN2,IGLC3,NOD2,HLA-E,NBN,IGHV3-66,IGHV3-73,IGHV5-10-1,BCL6,IGHV3-11,IGHV3-48,IGHV3-13	T0_V_T2_down
query_1	4.41073e-26	287	295	49	0.166102	0.170732	GO:0002460	GO:BP	adaptive immune response based on somatic recombination of immune receptors built from immunoglobulin superfamily domains	C1QC,CD274,SERPING1,IGHV3-7,FCGR1A,IGHV4-39,IGHV3-21,SOCS3,IGHA1,IGHV3-15,IL27,CEACAM1,IGHV6-1,IGHV3-33,IGHV3-23,IGHV4-59,IGHA2,IGHV1-18,IGHV4-4,IGHG2,IGHV3-74,IGLC2,ICAM1,IGHV1-2,IGHV5-51,IL1B,IGHV4-61,IGHG1,IGHV1-46,FCER1G,IGHV2-70,IGHV3-30,IGHV2-5,NECTIN2,CCR2,IGLC3,NOD2,HLA-E,NBN,IGHV3-66,IGHV3-73,RSAD2,IGHV5-10-1,HLA-DRA,BCL6,IGHV3-11,LILRB4,IGHV3-48,IGHV3-13	T0_V_T2_down
query_1	8.87287e-26	1234	292	102	0.349315	0.082658	GO:0006952	GO:BP	defense response	FCGR1A,BATF2,SERPING1,GBP5,GBP6,C1QC,AIM2,GBP1,APOL1,APOL2,GBP2,CEACAM1,IRF1,GBP4,UBE2L6,IL27,TIFA,TAP1,TRIM21,POLB,ADM,STAT1,RHBDF2,CD177,RTP4,RAB20,NOD2,PML,PARP9,SOCS3,IL1B,SLAMF8,CARD16,NECTIN2,TRIM22,H2BC12,GBP3,TLR5,FANCA,IFITM3,TNFAIP6,TRAFD1,CASP4,FCER1G,CASP1,ANXA3,IFIT3,CLU,MOV10,PARP14,PIK3AP1,DTX3L,FFAR2,LGALS3BP,RNF213,MARCO,TREML1,SP140,CALCOCO2,OSM,GCH1,NLRC4,BCL6,GBA1,HP,PLSCR1,VA…	T0_V_T3_down
query_1	6.62393e-25	271	295	47	0.159322	0.173432	GO:0002449	GO:BP	lymphocyte mediated immunity	C1QC,SERPING1,IGHV3-7,FCGR1A,IGHV4-39,IGHV3-21,IGHA1,IGHV3-15,CEACAM1,IGHV6-1,IGHV3-33,IGHV3-23,IGHV4-59,IGHA2,IGHV1-18,IGHV4-4,IGHG2,IGHV3-74,IGLC2,ICAM1,IGHV1-2,IGHV5-51,IL1B,IGHV4-61,IGHG1,IGHV1-46,FCER1G,IGHV2-70,IGHV3-30,IGHV2-5,NECTIN2,CCR2,IGLC3,SLAMF7,NOD2,HLA-E,NBN,IGHV3-66,IGHV3-73,RSAD2,IGHV5-10-1,HLA-DRA,BCL6,IGHV3-11,LILRB4,IGHV3-48,IGHV3-13	T0_V_T2_down
query_1	1.08764e-24	497	169	46	0.272189	0.0925553	REAC:R-HSA-109582	REAC	Hemostasis	CD177,SERPING1,IGHV3-7,IGHV4-39,SDC3,JCHAIN,IGLV1-40,IGLV6-57,IGKV1-5,IGKV2-30,LHFPL2,IGHA1,IGLV3-1,IGLV2-14,CEACAM1,IGKV3-15,IGLV1-47,IGKV4-1,IGLV3-19,IGHV3-33,IGLV2-8,IGKV1-16,IGHV3-23,SDC1,IGLV3-21,IGHV4-59,IGLV1-44,IGHA2,IGLV2-23,IGLV3-25,IGLC2,IGHV1-2,LGALS3BP,IGKV3-20,IRF1,IGLV2-11,SELL,IGKV3-11,IGHV1-46,GAS6,IGKV1-12,IGKV1-39,FCER1G,IGHV2-70,IGHV3-30,IGKV3D-20	T0_V_T2_down
query_1	3.81029e-23	856	292	80	0.273973	0.0934579	GO:0098542	GO:BP	defense response to other organism	FCGR1A,BATF2,SERPING1,GBP5,GBP6,C1QC,AIM2,GBP1,APOL1,GBP2,CEACAM1,IRF1,GBP4,UBE2L6,IL27,TIFA,TRIM21,STAT1,CD177,RTP4,RAB20,NOD2,PML,PARP9,IL1B,SLAMF8,NECTIN2,TRIM22,H2BC12,GBP3,TLR5,IFITM3,TRAFD1,CASP4,FCER1G,CASP1,ANXA3,IFIT3,CLU,MOV10,PARP14,PIK3AP1,DTX3L,FFAR2,RNF213,MARCO,TREML1,CALCOCO2,GCH1,NLRC4,HP,PLSCR1,VAMP3,H2BC6,LY96,RBCK1,NMI,IFI35,ZNFX1,IGHA1,CXCL16,BCL3,ZBP1,IRF2,S100A9,H2BC21,ALPK…	T0_V_T3_down
query_1	4.02071e-23	1087	292	90	0.308219	0.0827967	GO:0051707	GO:BP	response to other organism	CD274,FCGR1A,BATF2,SERPING1,GBP5,PDCD1LG2,GBP6,C1QC,FAM20A,AIM2,GBP1,APOL1,GBP2,CEACAM1,IRF1,GBP4,UBE2L6,IL27,TIFA,TRIM21,ADM,STAT1,CD177,RTP4,RAB20,NOD2,PML,PARP9,IL1B,SLAMF8,CARD16,NECTIN2,TRIM22,H2BC12,GBP3,TLR5,IFITM3,TRAFD1,CASP4,FCER1G,CASP1,ANXA3,IFIT3,CLU,MOV10,PARP14,PIK3AP1,DTX3L,FFAR2,RNF213,NPC2,MARCO,TREML1,CALCOCO2,GCH1,NLRC4,HP,PLSCR1,VAMP3,ACTA2,H2BC6,LY96,RBCK1,NMI,IFI35,ZNFX1,IG…	T0_V_T3_down
query_1	4.02071e-23	1088	292	90	0.308219	0.0827206	GO:0043207	GO:BP	response to external biotic stimulus	CD274,FCGR1A,BATF2,SERPING1,GBP5,PDCD1LG2,GBP6,C1QC,FAM20A,AIM2,GBP1,APOL1,GBP2,CEACAM1,IRF1,GBP4,UBE2L6,IL27,TIFA,TRIM21,ADM,STAT1,CD177,RTP4,RAB20,NOD2,PML,PARP9,IL1B,SLAMF8,CARD16,NECTIN2,TRIM22,H2BC12,GBP3,TLR5,IFITM3,TRAFD1,CASP4,FCER1G,CASP1,ANXA3,IFIT3,CLU,MOV10,PARP14,PIK3AP1,DTX3L,FFAR2,RNF213,NPC2,MARCO,TREML1,CALCOCO2,GCH1,NLRC4,HP,PLSCR1,VAMP3,ACTA2,H2BC6,LY96,RBCK1,NMI,IFI35,ZNFX1,IG…	T0_V_T3_down
query_1	4.83835e-23	2031	292	123	0.421233	0.0605613	GO:0002376	GO:BP	immune system process	CD274,FCGR1A,BATF2,SERPING1,GBP5,PDCD1LG2,GBP6,C1QC,AIM2,GBP1,APOL1,GBP2,CEACAM1,ICAM1,LIMK1,DUSP3,IRF1,GBP4,UBE2L6,SMARCD3,SECTM1,IL27,TIFA,TAP1,TRIM21,POLB,STAT1,RHBDF2,CD177,IL15RA,RAB20,NOD2,PML,PARP9,SOCS3,IL1B,PSMB9,SLAMF8,NECTIN2,TRIM22,H2BC12,GBP3,TLR5,FANCA,IFITM3,TNFAIP6,SELL,TRAFD1,CASP4,FCER1G,CASP1,ANXA3,IFIT3,CLU,DYSF,TNFSF10,PADI2,PARP14,PIK3AP1,DTX3L,PSMB8,FFAR2,FAS,GAS6,RNF213,MA…	T0_V_T3_down
query_1	4.93715e-23	348	295	50	0.169492	0.143678	GO:0002443	GO:BP	leukocyte mediated immunity	C1QC,CD177,SERPING1,IGHV3-7,FCGR1A,IGHV4-39,IGHV3-21,IGHA1,IGHV3-15,CEACAM1,IGHV6-1,IGHV3-33,IGHV3-23,IGHV4-59,ANXA3,IGHA2,IGHV1-18,IGHV4-4,IGHG2,IGHV3-74,IGLC2,ICAM1,IGHV1-2,IGHV5-51,IL1B,IGHV4-61,IGHG1,IGHV1-46,FCER1G,IGHV2-70,IGHV3-30,FCAR,IGHV2-5,NECTIN2,CCR2,IGLC3,SLAMF7,NOD2,HLA-E,NBN,IGHV3-66,IGHV3-73,RSAD2,IGHV5-10-1,HLA-DRA,BCL6,IGHV3-11,LILRB4,IGHV3-48,IGHV3-13	T0_V_T2_down
query_1	5.29241e-23	1234	278	95	0.341727	0.0769854	GO:0006952	GO:BP	defense response	FCGR1A,GBP5,BATF2,SERPING1,GBP6,GBP1,C1QC,APOL1,GBP2,APOL2,AIM2,GBP4,IRF1,UBE2L6,CEACAM1,TAP1,TIFA,STAT1,IL27,POLB,RHBDF2,SLAMF8,TRIM21,TRIM22,CD177,GBP3,RTP4,PML,TNFAIP6,H2BC12,ADM,PARP9,RAB20,IFIT3,CASP1,CARD16,PARP14,FANCA,TRAFD1,MOV10,IL1B,NOD2,MARCO,DTX3L,CLU,IFITM3,TLR5,NECTIN2,SOCS3,CASP4,FCER1G,PIK3AP1,RNF213,CALCOCO2,ANXA3,LGALS3BP,GCH1,HLA-E,APOL3,CCR2,NUB1,RSAD2,VAMP3,TREML1,PLSCR1,IFI…	T0_V_T4_down
query_1	9.34803e-23	514	285	59	0.207018	0.114786	GO:0002252	GO:BP	immune effector process	C1QC,CD177,SERPING1,IGHV3-7,FCGR1A,IGHV4-39,IGHV3-21,LIMK1,SOCS3,IGHA1,IGHV3-15,IL27,CEACAM1,IGHV6-1,IGHV3-33,IGHV3-23,IGHV4-59,SLAMF8,ANXA3,IGHA2,IGHV1-18,IGHV4-4,IGHG2,IGHV3-74,IGLC2,ICAM1,IGHV1-2,IGHV5-51,IL1B,IGHV4-61,IGHG1,VSIG4,IGHV1-46,FCER1G,IGHV2-70,IGHV3-30,FCAR,SBNO2,MZB1,IGHV2-5,NECTIN2,CCR2,IGLC3,CLEC4D,SLAMF7,DYSF,NOD2,HLA-E,NBN,IGHV3-66,IGHV3-73,RSAD2,IGHV5-10-1,HLA-DRA,BCL6,DDX60,…	T0_V_T2_down
query_1	1.09868e-22	1088	278	87	0.31295	0.0799632	GO:0043207	GO:BP	response to external biotic stimulus	FCGR1A,CD274,GBP5,BATF2,SERPING1,PDCD1LG2,GBP6,GBP1,C1QC,APOL1,GBP2,FAM20A,AIM2,GBP4,IRF1,UBE2L6,CEACAM1,TIFA,STAT1,IL27,SLAMF8,TRIM21,TRIM22,CD177,GBP3,RTP4,PML,H2BC12,ADM,PARP9,RAB20,IFIT3,CASP1,CARD16,PARP14,TRAFD1,MOV10,IL1B,NOD2,MARCO,DTX3L,CLU,IFITM3,TLR5,NPC2,NECTIN2,CASP4,FCER1G,PIK3AP1,RNF213,CALCOCO2,ANXA3,GCH1,HLA-E,NUB1,RSAD2,VAMP3,TREML1,PLSCR1,BAK1,IFI35,FFAR2,SLAMF7,STAT2,SOD2,NMI,…	T0_V_T4_down
query_1	1.09868e-22	1087	278	87	0.31295	0.0800368	GO:0051707	GO:BP	response to other organism	FCGR1A,CD274,GBP5,BATF2,SERPING1,PDCD1LG2,GBP6,GBP1,C1QC,APOL1,GBP2,FAM20A,AIM2,GBP4,IRF1,UBE2L6,CEACAM1,TIFA,STAT1,IL27,SLAMF8,TRIM21,TRIM22,CD177,GBP3,RTP4,PML,H2BC12,ADM,PARP9,RAB20,IFIT3,CASP1,CARD16,PARP14,TRAFD1,MOV10,IL1B,NOD2,MARCO,DTX3L,CLU,IFITM3,TLR5,NPC2,NECTIN2,CASP4,FCER1G,PIK3AP1,RNF213,CALCOCO2,ANXA3,GCH1,HLA-E,NUB1,RSAD2,VAMP3,TREML1,PLSCR1,BAK1,IFI35,FFAR2,SLAMF7,STAT2,SOD2,NMI,…	T0_V_T4_down
query_1	1.34488e-22	1114	292	90	0.308219	0.0807899	GO:0009607	GO:BP	response to biotic stimulus	CD274,FCGR1A,BATF2,SERPING1,GBP5,PDCD1LG2,GBP6,C1QC,FAM20A,AIM2,GBP1,APOL1,GBP2,CEACAM1,IRF1,GBP4,UBE2L6,IL27,TIFA,TRIM21,ADM,STAT1,CD177,RTP4,RAB20,NOD2,PML,PARP9,IL1B,SLAMF8,CARD16,NECTIN2,TRIM22,H2BC12,GBP3,TLR5,IFITM3,TRAFD1,CASP4,FCER1G,CASP1,ANXA3,IFIT3,CLU,MOV10,PARP14,PIK3AP1,DTX3L,FFAR2,RNF213,NPC2,MARCO,TREML1,CALCOCO2,GCH1,NLRC4,HP,PLSCR1,VAMP3,ACTA2,H2BC6,LY96,RBCK1,NMI,IFI35,ZNFX1,IG…	T0_V_T3_down
query_1	2.73369e-22	2031	278	118	0.42446	0.0580995	GO:0002376	GO:BP	immune system process	FCGR1A,CD274,GBP5,BATF2,SERPING1,PDCD1LG2,GBP6,GBP1,C1QC,LIMK1,APOL1,GBP2,AIM2,GBP4,DUSP3,IRF1,UBE2L6,CEACAM1,TAP1,ICAM1,TIFA,SMARCD3,STAT1,SECTM1,IL27,POLB,RHBDF2,SLAMF8,TRIM21,TRIM22,CD177,GBP3,PSMB9,PML,TNFAIP6,H2BC12,PARP9,IL15RA,PSMB8,RAB20,IFIT3,CASP1,PARP14,FANCA,TRAFD1,IL1B,NOD2,SOCS1,MARCO,DTX3L,CLU,IFITM3,TLR5,NECTIN2,SELL,SOCS3,TNFSF10,CASP4,FCER1G,PIK3AP1,FAS,RNF213,PADI2,PSME1,CALCOC…	T0_V_T4_down
query_1	3.15931e-22	1114	278	87	0.31295	0.0780969	GO:0009607	GO:BP	response to biotic stimulus	FCGR1A,CD274,GBP5,BATF2,SERPING1,PDCD1LG2,GBP6,GBP1,C1QC,APOL1,GBP2,FAM20A,AIM2,GBP4,IRF1,UBE2L6,CEACAM1,TIFA,STAT1,IL27,SLAMF8,TRIM21,TRIM22,CD177,GBP3,RTP4,PML,H2BC12,ADM,PARP9,RAB20,IFIT3,CASP1,CARD16,PARP14,TRAFD1,MOV10,IL1B,NOD2,MARCO,DTX3L,CLU,IFITM3,TLR5,NPC2,NECTIN2,CASP4,FCER1G,PIK3AP1,RNF213,CALCOCO2,ANXA3,GCH1,HLA-E,NUB1,RSAD2,VAMP3,TREML1,PLSCR1,BAK1,IFI35,FFAR2,SLAMF7,STAT2,SOD2,NMI,…	T0_V_T4_down
query_1	3.32747e-22	694	295	62	0.210169	0.0893372	REAC:R-HSA-1280218	REAC	Adaptive Immune System	CD274,PDCD1LG2,IGHV3-7,FCGR1A,IGHV4-39,IGLV1-40,IGLV6-57,IGKV1-5,IGKV2-30,SOCS3,IGLV3-1,IGLV2-14,IGKV3-15,IGLV1-47,IGKV4-1,IGLV3-19,IGHV3-33,IGLV2-8,IGKV1-16,IGHV3-23,IGLV3-21,IGHV4-59,IGLV1-44,TRIM69,TAP1,IGLV2-23,FBXO6,IGLV3-25,IGLC2,ICAM1,IGHV1-2,IGKV3-20,UBE2L6,IGLV2-11,SELL,IGKV3-11,IGHV1-46,IGKV1-12,IGKV1-39,IGHV2-70,TAPBP,HLA-DPA1,IGHV3-30,TRIM21,IGKV3D-20,LILRA6,IGHV2-5,NECTIN2,IGLC3,PIK3…	T0_V_T2_down
query_1	5.16015e-22	791	292	74	0.253425	0.0935525	GO:0140546	GO:BP	defense response to symbiont	FCGR1A,SERPING1,GBP5,GBP6,C1QC,AIM2,GBP1,APOL1,GBP2,CEACAM1,IRF1,GBP4,UBE2L6,IL27,TIFA,TRIM21,STAT1,CD177,RTP4,RAB20,NOD2,PML,PARP9,IL1B,SLAMF8,NECTIN2,TRIM22,H2BC12,GBP3,TLR5,IFITM3,TRAFD1,CASP4,FCER1G,CASP1,IFIT3,CLU,MOV10,PARP14,PIK3AP1,DTX3L,FFAR2,MARCO,TREML1,CALCOCO2,GCH1,NLRC4,PLSCR1,VAMP3,H2BC6,LY96,NMI,IFI35,ZNFX1,IGHA1,CXCL16,BCL3,ZBP1,IRF2,S100A9,H2BC21,ALPK1,NUB1,CD300A,STAT2,HLA-E,RS…	T0_V_T3_down
query_1	5.16015e-22	1231	292	93	0.318493	0.0755483	GO:0044419	GO:BP	biological process involved in interspecies interaction between organisms	CD274,FCGR1A,BATF2,SERPING1,GBP5,PDCD1LG2,GBP6,C1QC,FAM20A,AIM2,GBP1,APOL1,GBP2,CEACAM1,ICAM1,IRF1,GBP4,UBE2L6,IL27,TIFA,TRIM21,ADM,STAT1,CD177,RTP4,RAB20,NOD2,PML,PARP9,IL1B,SLAMF8,CARD16,NECTIN2,TRIM22,H2BC12,GBP3,TLR5,IFITM3,TRAFD1,CASP4,FCER1G,CASP1,ANXA3,IFIT3,CLU,MOV10,PARP14,PIK3AP1,DTX3L,FFAR2,GAS6,RNF213,NPC2,MARCO,TREML1,CALCOCO2,GCH1,NLRC4,HP,PLSCR1,VAMP3,ACTA2,H2BC6,LY96,RBCK1,NMI,IFI…	T0_V_T3_down
query_1	1.39925e-21	856	278	75	0.269784	0.0876168	GO:0098542	GO:BP	defense response to other organism	FCGR1A,GBP5,BATF2,SERPING1,GBP6,GBP1,C1QC,APOL1,GBP2,AIM2,GBP4,IRF1,UBE2L6,CEACAM1,TIFA,STAT1,IL27,SLAMF8,TRIM21,TRIM22,CD177,GBP3,RTP4,PML,H2BC12,PARP9,RAB20,IFIT3,CASP1,PARP14,TRAFD1,MOV10,IL1B,NOD2,MARCO,DTX3L,CLU,IFITM3,TLR5,NECTIN2,CASP4,FCER1G,PIK3AP1,RNF213,CALCOCO2,ANXA3,GCH1,HLA-E,NUB1,RSAD2,VAMP3,TREML1,PLSCR1,IFI35,FFAR2,SLAMF7,STAT2,NMI,CLEC4D,HLA-C,RBCK1,NLRC4,IFIH1,ZNFX1,ZBP1,FGL2,M…	T0_V_T4_down
query_1	2.09412e-21	694	292	68	0.232877	0.0979827	GO:0045087	GO:BP	innate immune response	FCGR1A,SERPING1,GBP5,GBP6,C1QC,AIM2,GBP1,APOL1,GBP2,CEACAM1,IRF1,GBP4,UBE2L6,IL27,TIFA,TRIM21,STAT1,CD177,RAB20,NOD2,PML,PARP9,SLAMF8,NECTIN2,TRIM22,H2BC12,GBP3,TLR5,IFITM3,TRAFD1,CASP4,FCER1G,CASP1,IFIT3,CLU,PARP14,PIK3AP1,DTX3L,FFAR2,MARCO,TREML1,CALCOCO2,GCH1,NLRC4,PLSCR1,VAMP3,H2BC6,LY96,NMI,IFI35,ZNFX1,CXCL16,ZBP1,S100A9,H2BC21,ALPK1,NUB1,CD300A,STAT2,HLA-E,RSAD2,GRN,TRIM38,IFI16,JAK3,JCHAIN…	T0_V_T3_down
query_1	3.27699e-21	1845	292	118	0.40411	0.0639566	GO:0009605	GO:BP	response to external stimulus	CD274,FCGR1A,BATF2,SERPING1,GBP5,PDCD1LG2,GBP6,C1QC,FAM20A,AIM2,GBP1,APOL1,KREMEN1,GBP2,CEACAM1,SCARF1,DUSP3,IRF1,GBP4,UBE2L6,CASP5,IL27,TIFA,ATF3,TRIM21,ADM,STAT1,PLAUR,RHBDF2,CD177,RTP4,IL15RA,RAB20,NOD2,PML,PARP9,GRIN3A,SOCS3,IL1B,SLAMF8,CARD16,NECTIN2,TRIM22,H2BC12,GBP3,TLR5,FANCA,IFITM3,TNFAIP6,KCNJ2,TRAFD1,CASP4,FCER1G,CASP1,ANXA3,IFIT3,CLU,MOV10,PADI2,PARP14,HPSE,PIK3AP1,DTX3L,FFAR2,FAS,GA…	T0_V_T3_down
query_1	3.48554e-21	1231	278	89	0.320144	0.0722989	GO:0044419	GO:BP	biological process involved in interspecies interaction between organisms	FCGR1A,CD274,GBP5,BATF2,SERPING1,PDCD1LG2,GBP6,GBP1,C1QC,APOL1,GBP2,FAM20A,AIM2,GBP4,IRF1,UBE2L6,CEACAM1,ICAM1,TIFA,STAT1,IL27,SLAMF8,TRIM21,TRIM22,CD177,GBP3,RTP4,PML,H2BC12,ADM,PARP9,RAB20,IFIT3,CASP1,CARD16,PARP14,TRAFD1,MOV10,IL1B,NOD2,MARCO,DTX3L,CLU,IFITM3,TLR5,NPC2,NECTIN2,CASP4,FCER1G,PIK3AP1,RNF213,CALCOCO2,ANXA3,GAS6,GCH1,HLA-E,NUB1,RSAD2,VAMP3,TREML1,PLSCR1,BAK1,IFI35,FFAR2,SLAMF7,STAT…	T0_V_T4_down
query_1	3.48554e-21	694	278	66	0.23741	0.0951009	GO:0045087	GO:BP	innate immune response	FCGR1A,GBP5,SERPING1,GBP6,GBP1,C1QC,APOL1,GBP2,AIM2,GBP4,IRF1,UBE2L6,CEACAM1,TIFA,STAT1,IL27,SLAMF8,TRIM21,TRIM22,CD177,GBP3,PML,H2BC12,PARP9,RAB20,IFIT3,CASP1,PARP14,TRAFD1,NOD2,MARCO,DTX3L,CLU,IFITM3,TLR5,NECTIN2,CASP4,FCER1G,PIK3AP1,CALCOCO2,GCH1,HLA-E,NUB1,RSAD2,VAMP3,TREML1,PLSCR1,IFI35,FFAR2,SLAMF7,STAT2,NMI,CLEC4D,HLA-C,NLRC4,IFIH1,ZNFX1,ZBP1,MR1,CXCL16,S100A9,CD300A,IL12RB1,IFI16,JAK3,H2B…	T0_V_T4_down
query_1	3.48554e-21	1433	278	96	0.345324	0.0669923	GO:0006955	GO:BP	immune response	FCGR1A,CD274,GBP5,SERPING1,PDCD1LG2,GBP6,GBP1,C1QC,LIMK1,APOL1,GBP2,AIM2,GBP4,DUSP3,IRF1,UBE2L6,CEACAM1,TAP1,ICAM1,TIFA,STAT1,SECTM1,IL27,RHBDF2,SLAMF8,TRIM21,TRIM22,CD177,GBP3,PML,H2BC12,PARP9,RAB20,IFIT3,CASP1,PARP14,TRAFD1,IL1B,NOD2,MARCO,DTX3L,CLU,IFITM3,TLR5,NECTIN2,SOCS3,TNFSF10,CASP4,FCER1G,PIK3AP1,FAS,CALCOCO2,ANXA3,DYSF,GCH1,HLA-E,CCR2,NUB1,RSAD2,VAMP3,NBN,TREML1,BTN3A1,PLSCR1,IFI35,FFAR…	T0_V_T4_down
query_1	7.02324e-21	1845	283	115	0.40636	0.0623306	GO:0009605	GO:BP	response to external stimulus	FCGR1A,CD274,GBP5,BATF2,SERPING1,PDCD1LG2,GBP6,GBP1,C1QC,APOL1,SCARF1,GBP2,FAM20A,AIM2,KREMEN1,GBP4,DUSP3,IRF1,UBE2L6,CEACAM1,TIFA,STAT1,IL27,RHBDF2,ATF3,SLAMF8,CASP5,TRIM21,TRIM22,CD177,GBP3,RTP4,PML,TNFAIP6,H2BC12,GRIN3A,ADM,PARP9,KCNJ2,IL15RA,PLAUR,RAB20,IFIT3,CASP1,CARD16,PARP14,FANCA,TRAFD1,MOV10,IL1B,NOD2,MARCO,DTX3L,CLU,IFITM3,TLR5,NPC2,NECTIN2,SOCS3,TYMP,CASP4,FCER1G,PIK3AP1,FAS,RNF213,PA…	T0_V_T4_down
query_1	8.98633e-21	1616	276	97	0.351449	0.0600248	REAC:R-HSA-168256	REAC	Immune System	FCGR1A,CD274,GBP5,SERPING1,PDCD1LG2,GBP6,GBP1,C1QC,LIMK1,GBP2,AIM2,FBXO6,GBP4,DUSP3,IRF1,UBE2L6,CEACAM1,TAP1,ICAM1,TIFA,STAT1,IL27,TRIM21,TRIM22,CD177,GBP3,PSMB9,PML,PSME2,TNFAIP6,IL15RA,PLAUR,GPR84,PSMB8,IFIT3,LTA4H,CASP1,CTSA,LMNB1,IL1B,NOD2,SOCS1,DTX3L,CLU,IFITM3,TLR5,NPC2,NECTIN2,SELL,SOCS3,GNS,CASP4,FCER1G,PIK3AP1,RNF213,PADI2,TRIM69,PSME1,HPSE,HLA-E,GYG1,CCR2,SDC1,RSAD2,VAMP3,TREML1,BTN3A1,…	T0_V_T4_down
query_1	1.06405e-20	791	278	70	0.251799	0.0884956	GO:0140546	GO:BP	defense response to symbiont	FCGR1A,GBP5,SERPING1,GBP6,GBP1,C1QC,APOL1,GBP2,AIM2,GBP4,IRF1,UBE2L6,CEACAM1,TIFA,STAT1,IL27,SLAMF8,TRIM21,TRIM22,CD177,GBP3,RTP4,PML,H2BC12,PARP9,RAB20,IFIT3,CASP1,PARP14,TRAFD1,MOV10,IL1B,NOD2,MARCO,DTX3L,CLU,IFITM3,TLR5,NECTIN2,CASP4,FCER1G,PIK3AP1,CALCOCO2,GCH1,HLA-E,NUB1,RSAD2,VAMP3,TREML1,PLSCR1,IFI35,FFAR2,SLAMF7,STAT2,NMI,CLEC4D,HLA-C,NLRC4,IFIH1,ZNFX1,ZBP1,FGL2,MR1,CXCL16,S100A9,CD300A,I…	T0_V_T4_down
query_1	1.10859e-20	1433	292	98	0.335616	0.068388	GO:0006955	GO:BP	immune response	CD274,FCGR1A,SERPING1,GBP5,PDCD1LG2,GBP6,C1QC,AIM2,GBP1,APOL1,GBP2,CEACAM1,ICAM1,LIMK1,DUSP3,IRF1,GBP4,UBE2L6,SECTM1,IL27,TIFA,TAP1,TRIM21,STAT1,RHBDF2,CD177,RAB20,NOD2,PML,PARP9,SOCS3,IL1B,SLAMF8,NECTIN2,TRIM22,H2BC12,GBP3,TLR5,IFITM3,TRAFD1,CASP4,FCER1G,CASP1,ANXA3,IFIT3,CLU,DYSF,TNFSF10,PARP14,PIK3AP1,DTX3L,FFAR2,FAS,MARCO,TREML1,CALCOCO2,OSM,GCH1,NLRC4,BCL6,PLSCR1,VAMP3,NBN,H2BC6,LY96,RBCK1,N…	T0_V_T3_down
query_1	1.54896e-20	393	185	37	0.2	0.0941476	REAC:R-HSA-9679506	REAC	SARS-CoV Infections	IGHV3-7,IGHV4-39,SDC3,IGLV1-40,IGLV6-57,IGKV1-5,IGKV2-30,IGLV3-1,IGLV2-14,IGKV3-15,IGLV1-47,IGKV4-1,IGLV3-19,IGHV3-33,IGLV2-8,IGKV1-16,IGHV3-23,SDC1,IGLV3-21,IGHV4-59,IGLV1-44,IGLV2-23,IGLV3-25,IGLC2,IGHV1-2,IGKV3-20,IGLV2-11,IGKV3-11,IGHV1-46,IGKV1-12,IGKV1-39,IGHV2-70,IGHV3-30,IGKV3D-20,CASP1,IGHV2-5,STAT1	T0_V_T2_down
query_1	1.65932e-20	1616	292	100	0.342466	0.0618812	REAC:R-HSA-168256	REAC	Immune System	CD274,FCGR1A,SERPING1,GBP5,PDCD1LG2,GBP6,C1QC,AIM2,GBP1,GBP2,CEACAM1,ICAM1,LIMK1,FBXO6,DUSP3,IRF1,GBP4,UBE2L6,IL27,TIFA,TAP1,TRIM21,STAT1,PLAUR,CD177,IL15RA,NOD2,PML,SOCS3,IL1B,PSMB9,LMNB1,NECTIN2,TRIM22,GBP3,TLR5,IFITM3,TNFAIP6,GPR84,SELL,PSME2,CASP4,FCER1G,CASP1,IFIT3,CTSA,CLU,LTA4H,PADI2,TRIM69,HPSE,PIK3AP1,DTX3L,CLEC2B,PSMB8,RNF213,GNS,NPC2,TREML1,OSM,NLRC4,BCL6,HP,VAMP3,LY96,RBCK1,IFI35,DAPP…	T0_V_T3_down
query_1	3.77676e-20	76	141	22	0.156028	0.289474	GO:0072562	GO:CC	blood microparticle	C1QC,SERPING1,IGHV3-7,JCHAIN,IGKV1-5,IGKV2-30,IGHA1,IGKV3-15,IGLV1-47,IGKV4-1,IGHV3-23,IGLV3-21,IGHA2,IGHG2,APOL1,IGLV3-25,IGLC2,LGALS3BP,IGKV3-20,IGHG1,IGKV3-11,IGKV1-39	T0_V_T2_down
query_1	1.61587e-18	1234	282	87	0.308511	0.0705024	GO:0006952	GO:BP	defense response	C1QC,CD177,SERPING1,AIM2,GBP6,FCGR1A,TIFA,BATF2,GBP5,GBP1,JCHAIN,SOCS3,IGHA1,ADM,IL27,CEACAM1,SLAMF8,ANXA3,IGHA2,TAP1,TLR5,GBP3,TNFAIP6,RHBDF2,H2BC12,IGHG2,APOL1,RTP4,TRIM22,OSM,IL1B,LGALS3BP,IGKV3-20,GCH1,IGHG1,UBE2L6,IRF1,VSIG4,APOL2,GBP4,RAB20,PLSCR1,GBP2,IFIT3,GBA1,CARD16,FCER1G,HLA-DPA1,FCAR,TRIM21,CCRL2,MARCO,SBNO2,CASP1,PML,STAT1,NLRC4,NECTIN2,CCR2,IFITM3,CLEC4D,OAS1,PIK3AP1,SLAMF7,H2BC6,M…	T0_V_T2_down
query_1	1.61587e-18	791	272	66	0.242647	0.0834387	GO:0140546	GO:BP	defense response to symbiont	C1QC,CD177,SERPING1,AIM2,GBP6,FCGR1A,TIFA,GBP5,GBP1,JCHAIN,IGHA1,IL27,CEACAM1,SLAMF8,IGHA2,TLR5,GBP3,H2BC12,IGHG2,APOL1,RTP4,TRIM22,IL1B,IGKV3-20,GCH1,IGHG1,UBE2L6,IRF1,VSIG4,GBP4,RAB20,PLSCR1,GBP2,IFIT3,FCER1G,HLA-DPA1,FCAR,TRIM21,MARCO,CASP1,PML,STAT1,NLRC4,NECTIN2,IFITM3,CLEC4D,OAS1,PIK3AP1,SLAMF7,H2BC6,NAIP,NOD2,HLA-E,CASP4,MOV10,OAS3,IFI44L,RSAD2,PARP9,S100A9,H2BC21,IFI27,FPR2,CXCL16,VAMP3,D…	T0_V_T2_down
query_1	2.09518e-18	856	272	69	0.253676	0.0806075	GO:0098542	GO:BP	defense response to other organism	C1QC,CD177,SERPING1,AIM2,GBP6,FCGR1A,TIFA,BATF2,GBP5,GBP1,JCHAIN,IGHA1,IL27,CEACAM1,SLAMF8,ANXA3,IGHA2,TLR5,GBP3,H2BC12,IGHG2,APOL1,RTP4,TRIM22,IL1B,IGKV3-20,GCH1,IGHG1,UBE2L6,IRF1,VSIG4,GBP4,RAB20,PLSCR1,GBP2,IFIT3,FCER1G,HLA-DPA1,FCAR,TRIM21,MARCO,CASP1,PML,STAT1,NLRC4,NECTIN2,IFITM3,CLEC4D,OAS1,PIK3AP1,SLAMF7,H2BC6,NAIP,NOD2,HLA-E,CASP4,MOV10,OAS3,IFI44L,RSAD2,PARP9,S100A9,H2BC21,HP,IFI27,FPR2…	T0_V_T2_down
query_1	8.79677e-18	2492	286	142	0.496503	0.0569823	GO:0005576	GO:CC	extracellular region	C1QB,C1QC,CD274,PDCD1LG2,CD177,NRN1,FAM20A,SERPING1,IGHV3-7,GBP6,IGHV4-39,GBP1,JCHAIN,IGLV1-40,IGHV3-21,IGLV6-57,IGKV1-5,IGKV2-30,IGHA1,IGHV3-15,IGLV3-1,ADM,IL27,IGLV2-14,CEACAM1,CDCP1,IGHV6-1,APOL4,IGKV3-15,IGLV1-47,IGKV4-1,IGLV3-19,IGHV3-33,IGLV2-8,IGKV1-16,IGHV3-23,SDC1,IGLV3-21,IGHV4-59,IGLV1-44,IGKV2D-29,ANXA3,IGHA2,IGHV1-18,IGHV4-4,IGLV2-23,TNFAIP6,H2BC12,IGHG2,IGHV3-74,APOL1,WARS1,IGLV3-25…	T0_V_T2_down
query_1	1.0506e-17	1087	277	78	0.281588	0.0717571	GO:0051707	GO:BP	response to other organism	C1QC,CD274,PDCD1LG2,CD177,FAM20A,SERPING1,AIM2,GBP6,FCGR1A,TIFA,BATF2,GBP5,GBP1,JCHAIN,IGHA1,ADM,IL27,CEACAM1,SLAMF8,ANXA3,IGHA2,TLR5,GBP3,H2BC12,IGHG2,APOL1,RTP4,TRIM22,IL1B,IGKV3-20,GCH1,IGHG1,UBE2L6,IRF1,VSIG4,GBP4,RAB20,PLSCR1,GBP2,IFIT3,CARD16,FCER1G,HLA-DPA1,FCAR,TRIM21,MARCO,SBNO2,CASP1,PML,STAT1,NLRC4,NECTIN2,IFITM3,CLEC4D,OAS1,PIK3AP1,SLAMF7,H2BC6,MAPK14,NAIP,NOD2,HLA-E,CASP4,MOV10,OAS3,…	T0_V_T2_down
query_1	1.09627e-17	1088	277	78	0.281588	0.0716912	GO:0043207	GO:BP	response to external biotic stimulus	C1QC,CD274,PDCD1LG2,CD177,FAM20A,SERPING1,AIM2,GBP6,FCGR1A,TIFA,BATF2,GBP5,GBP1,JCHAIN,IGHA1,ADM,IL27,CEACAM1,SLAMF8,ANXA3,IGHA2,TLR5,GBP3,H2BC12,IGHG2,APOL1,RTP4,TRIM22,IL1B,IGKV3-20,GCH1,IGHG1,UBE2L6,IRF1,VSIG4,GBP4,RAB20,PLSCR1,GBP2,IFIT3,CARD16,FCER1G,HLA-DPA1,FCAR,TRIM21,MARCO,SBNO2,CASP1,PML,STAT1,NLRC4,NECTIN2,IFITM3,CLEC4D,OAS1,PIK3AP1,SLAMF7,H2BC6,MAPK14,NAIP,NOD2,HLA-E,CASP4,MOV10,OAS3,…	T0_V_T2_down
query_1	2.82485e-17	583	271	53	0.195572	0.0909091	GO:0031347	GO:BP	regulation of defense response	FCGR1A,GBP5,SERPING1,GBP2,AIM2,IRF1,CEACAM1,TIFA,STAT1,IL27,RHBDF2,SLAMF8,TRIM21,TRIM22,PML,TNFAIP6,PARP9,CASP1,CARD16,PARP14,FANCA,TRAFD1,IL1B,NOD2,DTX3L,TLR5,NECTIN2,SOCS3,CASP4,PIK3AP1,HLA-E,CCR2,RSAD2,PLSCR1,IFI35,FFAR2,FFAR3,STAT2,NMI,GBA1,OSM,MAPK14,NLRC4,SBNO2,BCL6,IFIH1,ZNFX1,ZBP1,FGL2,S100A9,CD300A,IL12RB1,IFI16	T0_V_T4_down
query_1	2.96522e-17	583	291	55	0.189003	0.0943396	GO:0031347	GO:BP	regulation of defense response	FCGR1A,SERPING1,GBP5,AIM2,GBP2,CEACAM1,IRF1,IL27,TIFA,TRIM21,STAT1,RHBDF2,NOD2,PML,PARP9,SOCS3,IL1B,SLAMF8,CARD16,NECTIN2,TRIM22,TLR5,FANCA,TNFAIP6,TRAFD1,CASP4,CASP1,PARP14,PIK3AP1,DTX3L,FFAR2,OSM,NLRC4,BCL6,GBA1,PLSCR1,LY96,NMI,IFI35,ELF4,ZNFX1,ZBP1,S100A9,ALPK1,STAT3,CD300A,STAT2,MAPK14,HLA-E,PRKCD,RSAD2,GRN,TRIM38,IFI16,S100A8	T0_V_T3_down
query_1	3.90059e-17	1114	277	78	0.281588	0.070018	GO:0009607	GO:BP	response to biotic stimulus	C1QC,CD274,PDCD1LG2,CD177,FAM20A,SERPING1,AIM2,GBP6,FCGR1A,TIFA,BATF2,GBP5,GBP1,JCHAIN,IGHA1,ADM,IL27,CEACAM1,SLAMF8,ANXA3,IGHA2,TLR5,GBP3,H2BC12,IGHG2,APOL1,RTP4,TRIM22,IL1B,IGKV3-20,GCH1,IGHG1,UBE2L6,IRF1,VSIG4,GBP4,RAB20,PLSCR1,GBP2,IFIT3,CARD16,FCER1G,HLA-DPA1,FCAR,TRIM21,MARCO,SBNO2,CASP1,PML,STAT1,NLRC4,NECTIN2,IFITM3,CLEC4D,OAS1,PIK3AP1,SLAMF7,H2BC6,MAPK14,NAIP,NOD2,HLA-E,CASP4,MOV10,OAS3,…	T0_V_T2_down
query_1	6.2242e-17	589	199	42	0.211055	0.0713073	REAC:R-HSA-5653656	REAC	Vesicle-mediated transport	IGHV3-7,SCARF1,IGHV4-39,JCHAIN,IGLV1-40,IGLV6-57,IGKV1-5,IGKV2-30,IGHA1,IGLV3-1,IGLV2-14,IGKV3-15,IGLV1-47,IGKV4-1,IGLV3-19,IGHV3-33,IGLV2-8,IGKV1-16,IGHV3-23,IGLV3-21,IGHV4-59,IGLV1-44,IGHA2,IGLV2-23,APOL1,IGLV3-25,IGLC2,IGHV1-2,IGKV3-20,IGLV2-11,IGKV3-11,IGHV1-46,IGKV1-12,IGKV1-39,IGHV2-70,IGHV3-30,IGKV3D-20,MARCO,IGHV2-5,SORT1,GNS,IGLC3	T0_V_T2_down
query_1	2.52358e-16	790	291	64	0.219931	0.0810127	GO:0032101	GO:BP	regulation of response to external stimulus	FCGR1A,SERPING1,GBP5,AIM2,KREMEN1,GBP2,CEACAM1,SCARF1,DUSP3,IRF1,IL27,TIFA,TRIM21,STAT1,PLAUR,RHBDF2,NOD2,PML,PARP9,GRIN3A,SOCS3,IL1B,SLAMF8,CARD16,NECTIN2,TRIM22,TLR5,FANCA,TNFAIP6,TRAFD1,CASP4,CASP1,PADI2,PARP14,HPSE,PIK3AP1,DTX3L,FFAR2,GAS6,OSM,NLRC4,BCL6,GBA1,PLSCR1,LY96,NMI,IFI35,ELF4,ZNFX1,ZBP1,S100A9,ALPK1,STAT3,CD300A,STAT2,MAPK14,HLA-E,SEMA4A,PRKCD,RSAD2,GRN,TRIM38,IFI16,S100A8	T0_V_T3_down
query_1	3.58745e-16	1231	277	80	0.288809	0.0649878	GO:0044419	GO:BP	biological process involved in interspecies interaction between organisms	C1QC,CD274,PDCD1LG2,CD177,FAM20A,SERPING1,AIM2,GBP6,FCGR1A,TIFA,BATF2,GBP5,GBP1,JCHAIN,IGHA1,ADM,IL27,CEACAM1,SLAMF8,ANXA3,IGHA2,TLR5,GBP3,H2BC12,IGHG2,APOL1,RTP4,ICAM1,TRIM22,IL1B,IGKV3-20,GCH1,IGHG1,UBE2L6,IRF1,VSIG4,GBP4,GAS6,RAB20,PLSCR1,GBP2,IFIT3,CARD16,FCER1G,HLA-DPA1,FCAR,TRIM21,MARCO,SBNO2,CASP1,PML,STAT1,NLRC4,NECTIN2,IFITM3,CLEC4D,OAS1,PIK3AP1,SLAMF7,H2BC6,MAPK14,NAIP,NOD2,HLA-E,CASP4,…	T0_V_T2_down
query_1	5.0243e-16	790	271	61	0.225092	0.0772152	GO:0032101	GO:BP	regulation of response to external stimulus	FCGR1A,GBP5,SERPING1,SCARF1,GBP2,AIM2,KREMEN1,DUSP3,IRF1,CEACAM1,TIFA,STAT1,IL27,RHBDF2,SLAMF8,TRIM21,TRIM22,PML,TNFAIP6,GRIN3A,PARP9,PLAUR,CASP1,CARD16,PARP14,FANCA,TRAFD1,IL1B,NOD2,DTX3L,TLR5,NECTIN2,SOCS3,CASP4,PIK3AP1,PADI2,GAS6,HPSE,HLA-E,CCR2,RSAD2,PLSCR1,IFI35,FFAR2,FFAR3,STAT2,NMI,GBA1,OSM,MAPK14,NLRC4,SBNO2,BCL6,IFIH1,ZNFX1,ZBP1,FGL2,S100A9,CD300A,IL12RB1,IFI16	T0_V_T4_down
query_1	5.86291e-16	836	185	46	0.248649	0.0550239	REAC:R-HSA-5663205	REAC	Infectious disease	IGHV3-7,FCGR1A,IGHV4-39,SDC3,IGLV1-40,IGLV6-57,IGKV1-5,IGKV2-30,IGLV3-1,IGLV2-14,IGKV3-15,IGLV1-47,IGKV4-1,IGLV3-19,IGHV3-33,IGLV2-8,IGKV1-16,IGHV3-23,SDC1,IGLV3-21,IGHV4-59,IGLV1-44,IGLV2-23,RHBDF2,H2BC12,IGHG2,IGLV3-25,IGLC2,ADCY3,IGHV1-2,IL1B,IGKV3-20,IGHG1,IGLV2-11,IGKV3-11,IGHV1-46,IGKV1-12,IGKV1-39,IGHV2-70,IGHV3-30,IGKV3D-20,CASP1,H2BC5,IGHV2-5,PML,STAT1	T0_V_T2_down
query_1	7.64098e-16	158	212	25	0.117925	0.158228	REAC:R-HSA-913531	REAC	Interferon Signaling	FCGR1A,GBP5,GBP6,GBP1,GBP2,GBP4,IRF1,UBE2L6,ICAM1,STAT1,TRIM21,TRIM22,GBP3,PML,PSMB8,IFIT3,SOCS1,IFITM3,SOCS3,HLA-E,RSAD2,IFI35,STAT2,XAF1,HLA-C	T0_V_T4_down
query_1	7.8084e-16	158	292	27	0.0924658	0.170886	REAC:R-HSA-913531	REAC	Interferon Signaling	GBP6,FCGR1A,GBP5,GBP1,SOCS3,GBP3,ICAM1,TRIM22,UBE2L6,IRF1,GBP4,GBP2,IFIT3,HLA-DPA1,TRIM21,PML,STAT1,IFITM3,OAS1,HLA-E,OAS3,SOCS1,RSAD2,HLA-DRA,IFI27,XAF1,PSMB8	T0_V_T2_down
query_1	8.22064e-16	73	258	19	0.0736434	0.260274	REAC:R-HSA-877300	REAC	Interferon gamma signaling	GBP6,FCGR1A,GBP5,GBP1,SOCS3,GBP3,ICAM1,TRIM22,IRF1,GBP4,GBP2,HLA-DPA1,TRIM21,PML,OAS1,HLA-E,OAS3,SOCS1,HLA-DRA	T0_V_T2_down
query_1	1.01592e-15	704	276	55	0.199275	0.078125	GO:0050776	GO:BP	regulation of immune response	FCGR1A,CD274,GBP5,SERPING1,GBP1,C1QC,LIMK1,GBP2,AIM2,DUSP3,IRF1,CEACAM1,TIFA,IL27,RHBDF2,SLAMF8,TRIM21,CD177,PARP9,CASP1,PARP14,TRAFD1,IL1B,NOD2,CLU,TLR5,NECTIN2,FCER1G,PIK3AP1,HLA-E,CCR2,RSAD2,BTN3A1,PLSCR1,IFI35,FFAR2,STAT2,NMI,CLEC4D,HLA-C,MAPK14,RBCK1,NLRC4,BCL6,IFIH1,BTN3A2,ZNFX1,ZBP1,FGL2,MR1,CD300A,IL12RB1,BTN3A3,IFI16,JAK3	T0_V_T4_down
query_1	1.06842e-15	694	272	57	0.209559	0.0821326	GO:0045087	GO:BP	innate immune response	C1QC,CD177,SERPING1,AIM2,GBP6,FCGR1A,TIFA,GBP5,GBP1,JCHAIN,IL27,CEACAM1,SLAMF8,TLR5,GBP3,H2BC12,APOL1,TRIM22,GCH1,UBE2L6,IRF1,VSIG4,GBP4,RAB20,PLSCR1,GBP2,IFIT3,FCER1G,HLA-DPA1,FCAR,TRIM21,MARCO,CASP1,PML,STAT1,NLRC4,NECTIN2,IFITM3,CLEC4D,OAS1,PIK3AP1,SLAMF7,H2BC6,NAIP,NOD2,HLA-E,CASP4,OAS3,RSAD2,PARP9,S100A9,H2BC21,IFI27,FPR2,CXCL16,VAMP3,DDX60	T0_V_T2_down
query_1	1.54596e-15	403	271	41	0.151292	0.101737	GO:0002831	GO:BP	regulation of response to biotic stimulus	CD274,GBP5,SERPING1,GBP2,AIM2,IRF1,CEACAM1,TIFA,STAT1,IL27,SLAMF8,TRIM21,TRIM22,PML,PARP9,CASP1,CARD16,PARP14,TRAFD1,IL1B,NOD2,DTX3L,TLR5,NECTIN2,PIK3AP1,HLA-E,RSAD2,PLSCR1,IFI35,FFAR2,STAT2,NMI,NLRC4,IFIH1,ZNFX1,ZBP1,FGL2,MR1,CD300A,IL12RB1,IFI16	T0_V_T4_down
query_1	7.12366e-15	158	283	27	0.0954064	0.170886	REAC:R-HSA-913531	REAC	Interferon Signaling	FCGR1A,GBP5,GBP6,GBP1,GBP2,ICAM1,IRF1,GBP4,UBE2L6,TRIM21,STAT1,PML,SOCS3,TRIM22,GBP3,IFITM3,IFIT3,PSMB8,IFI35,XAF1,IRF2,SOCS1,STAT2,HLA-E,PRKCD,RSAD2,TRIM38	T0_V_T3_down
query_1	8.9389e-15	681	185	40	0.216216	0.0587372	REAC:R-HSA-9824446	REAC	Viral Infection Pathways	IGHV3-7,IGHV4-39,SDC3,IGLV1-40,IGLV6-57,IGKV1-5,IGKV2-30,IGLV3-1,IGLV2-14,IGKV3-15,IGLV1-47,IGKV4-1,IGLV3-19,IGHV3-33,IGLV2-8,IGKV1-16,IGHV3-23,SDC1,IGLV3-21,IGHV4-59,IGLV1-44,IGLV2-23,H2BC12,IGLV3-25,IGLC2,IGHV1-2,IGKV3-20,IGLV2-11,IGKV3-11,IGHV1-46,IGKV1-12,IGKV1-39,IGHV2-70,IGHV3-30,IGKV3D-20,CASP1,H2BC5,IGHV2-5,PML,STAT1	T0_V_T2_down
query_1	9.36226e-15	403	284	41	0.144366	0.101737	GO:0002831	GO:BP	regulation of response to biotic stimulus	CD274,SERPING1,GBP5,AIM2,GBP2,CEACAM1,IRF1,IL27,TIFA,TRIM21,STAT1,NOD2,PML,PARP9,IL1B,SLAMF8,CARD16,NECTIN2,TRIM22,TLR5,TRAFD1,CASP1,PARP14,PIK3AP1,DTX3L,FFAR2,NLRC4,PLSCR1,LY96,NMI,IFI35,ZNFX1,ZBP1,ALPK1,CD300A,STAT2,HLA-E,RSAD2,GRN,TRIM38,IFI16	T0_V_T3_down
query_1	1.52722e-14	1845	277	101	0.364621	0.0547425	GO:0009605	GO:BP	response to external stimulus	C1QC,CD274,PDCD1LG2,CD177,FAM20A,SERPING1,AIM2,GBP6,SCARF1,FCGR1A,TIFA,BATF2,GBP5,GBP1,JCHAIN,DUSP3,SOCS3,IGHA1,ADM,KREMEN1,IL27,CEACAM1,CASP5,SLAMF8,ATF3,ANXA3,IGHA2,TLR5,GBP3,TNFAIP6,RHBDF2,H2BC12,IGHG2,APOL1,RTP4,TRIM22,OSM,IL1B,GRIN3A,BHLHA15,IGKV3-20,GCH1,IGHG1,HPSE,UBE2L6,IRF1,VSIG4,GBP4,GAS6,RAB20,PLSCR1,GBP2,IFIT3,GBA1,CARD16,IL15RA,FCER1G,HLA-DPA1,FCAR,TRIM21,CCRL2,MARCO,SBNO2,CASP1,KCNJ…	T0_V_T2_down
query_1	1.69977e-14	177	265	32	0.120755	0.180791	GO:0042742	GO:BP	defense response to bacterium	GBP6,FCGR1A,GBP5,GBP1,JCHAIN,IGHA1,SLAMF8,ANXA3,IGHA2,GBP3,H2BC12,IGHG2,IL1B,IGKV3-20,IGHG1,GBP4,GBP2,FCER1G,CASP1,NLRC4,CLEC4D,OAS1,H2BC6,NAIP,NOD2,HLA-E,CASP4,OAS3,S100A9,H2BC21,HP,FPR2	T0_V_T2_down
query_1	5.44821e-14	1044	284	67	0.235915	0.0641762	GO:0080134	GO:BP	regulation of response to stress	FCGR1A,SERPING1,GBP5,AIM2,KREMEN1,RMI2,GBP2,CEACAM1,SCARF1,IRF1,SMARCD3,IL27,TIFA,TRIM21,STAT1,PLAUR,RHBDF2,NOD2,PML,PARP9,SOCS3,IL1B,SLAMF8,CARD16,NECTIN2,TRIM22,TLR5,FANCA,TNFAIP6,TRAFD1,CASP4,CASP1,CLU,PARP14,HPSE,PIK3AP1,DTX3L,FFAR2,FAS,OSM,GCH1,NLRC4,BCL6,GBA1,PLSCR1,LY96,NMI,IFI35,ELF4,ZNFX1,ZBP1,S100A9,GRINA,BAK1,ALPK1,INSL3,STAT3,CD300A,STAT2,MAPK14,HLA-E,PRKCD,RSAD2,MICU1,GRN,TRIM38,IFI16	T0_V_T3_down
query_1	8.33906e-14	564	214	41	0.191589	0.072695	REAC:R-HSA-1280215	REAC	Cytokine Signaling in Immune system	FCGR1A,GBP5,GBP6,GBP1,GBP2,GBP4,DUSP3,IRF1,UBE2L6,ICAM1,TIFA,STAT1,IL27,TRIM21,TRIM22,GBP3,PSMB9,PML,PSME2,IL15RA,PSMB8,IFIT3,CASP1,LMNB1,IL1B,NOD2,SOCS1,IFITM3,SOCS3,PSME1,HLA-E,CCR2,SDC1,RSAD2,IFI35,STAT2,SOD2,XAF1,OSM,HLA-C,MAPK14	T0_V_T4_down
query_1	1.07159e-13	1044	274	65	0.237226	0.0622605	GO:0080134	GO:BP	regulation of response to stress	FCGR1A,GBP5,SERPING1,SCARF1,GBP2,AIM2,KREMEN1,IRF1,RMI2,CEACAM1,TIFA,SMARCD3,STAT1,IL27,RHBDF2,SLAMF8,TRIM21,TRIM22,PML,TNFAIP6,PARP9,PLAUR,CASP1,CARD16,PARP14,FANCA,TRAFD1,IL1B,NOD2,DTX3L,CLU,TLR5,NECTIN2,SOCS3,CASP4,PIK3AP1,FAS,GCH1,HPSE,HLA-E,CCR2,RSAD2,PLSCR1,BAK1,IFI35,FFAR2,FFAR3,STAT2,NMI,GBA1,OSM,MAPK14,GRINA,NLRC4,SBNO2,BCL6,IFIH1,ZNFX1,ZBP1,FGL2,S100A9,CD300A,IL12RB1,IFI16,DDIAS	T0_V_T4_down
query_1	1.56324e-13	704	291	53	0.182131	0.0752841	GO:0050776	GO:BP	regulation of immune response	C1QC,CD274,CD177,SERPING1,AIM2,FCGR1A,TIFA,GBP5,GBP1,DUSP3,LIMK1,IGHA1,IL27,CEACAM1,SLAMF8,IGHA2,TLR5,RHBDF2,IGHG2,IL1B,IGHG1,IRF1,VSIG4,PLSCR1,GBP2,FCER1G,HLA-DPA1,FCAR,TRIM21,CASP1,NLRC4,NECTIN2,CCR2,IGLC3,CLEC4D,OAS1,PIK3AP1,BMX,MAPK14,NAIP,NOD2,HLA-E,OAS3,FCGR2A,RSAD2,PARP9,HLA-DRA,FPR2,BCL6,DDX60,CD38,LILRB4,IFI16	T0_V_T2_down
query_1	2.37026e-13	564	285	47	0.164912	0.0833333	REAC:R-HSA-1280215	REAC	Cytokine Signaling in Immune system	FCGR1A,GBP5,GBP6,GBP1,GBP2,ICAM1,DUSP3,IRF1,GBP4,UBE2L6,IL27,TIFA,TRIM21,STAT1,IL15RA,NOD2,PML,SOCS3,IL1B,PSMB9,LMNB1,TRIM22,GBP3,IFITM3,PSME2,CASP1,IFIT3,PSMB8,OSM,BCL6,IFI35,XAF1,LTBR,PSME1,IRF2,SOD2,SOCS1,SDC1,ALPK1,STAT3,STAT2,MAPK14,HLA-E,PRKCD,RSAD2,TRIM38,JAK3	T0_V_T3_down
query_1	3.3159e-13	1163	276	69	0.25	0.0593293	GO:0002682	GO:BP	regulation of immune system process	FCGR1A,CD274,GBP5,SERPING1,PDCD1LG2,GBP1,C1QC,LIMK1,GBP2,AIM2,DUSP3,IRF1,CEACAM1,ICAM1,TIFA,SMARCD3,STAT1,IL27,RHBDF2,SLAMF8,TRIM21,CD177,TNFAIP6,PARP9,IL15RA,CASP1,PARP14,FANCA,TRAFD1,IL1B,NOD2,SOCS1,CLU,TLR5,NECTIN2,FCER1G,PIK3AP1,PADI2,GAS6,ITGA2B,HLA-E,CCR2,RSAD2,BTN3A1,PLSCR1,IFI35,FFAR2,FFAR3,STAT2,NMI,CLEC4D,HLA-C,MAPK14,RBCK1,NLRC4,BCL6,IFIH1,BTN3A2,ZNFX1,ZBP1,FGL2,HCAR2,MR1,CD300A,IL12RB…	T0_V_T4_down
query_1	3.46955e-13	73	95	13	0.136842	0.178082	REAC:R-HSA-877300	REAC	Interferon gamma signaling	FCGR1A,GBP5,GBP6,GBP1,GBP2,ICAM1,IRF1,GBP4,TRIM21,PML,SOCS3,TRIM22,GBP3	T0_V_T3_down
query_1	7.45561e-13	73	161	15	0.0931677	0.205479	REAC:R-HSA-877300	REAC	Interferon gamma signaling	FCGR1A,GBP5,GBP6,GBP1,GBP2,GBP4,IRF1,ICAM1,TRIM21,TRIM22,GBP3,PML,SOCS1,SOCS3,HLA-E	T0_V_T4_down
query_1	1.04734e-12	704	292	52	0.178082	0.0738636	GO:0050776	GO:BP	regulation of immune response	CD274,FCGR1A,SERPING1,GBP5,C1QC,AIM2,GBP1,GBP2,CEACAM1,LIMK1,DUSP3,IRF1,IL27,TIFA,TRIM21,RHBDF2,CD177,NOD2,PARP9,IL1B,SLAMF8,NECTIN2,TLR5,TRAFD1,FCER1G,CASP1,CLU,PARP14,PIK3AP1,FFAR2,NLRC4,BCL6,PLSCR1,LY96,RBCK1,NMI,IFI35,ZNFX1,IGHA1,ZBP1,BTN3A1,ALPK1,CD300A,STAT2,MAPK14,HLA-E,PRKCD,RSAD2,GRN,IFI16,JAK3,CLEC4D	T0_V_T3_down
query_1	1.38572e-12	106	169	18	0.106509	0.169811	GO:0034341	GO:BP	response to type II interferon	GBP5,GBP6,GBP1,GBP2,GBP4,IRF1,STAT1,TRIM21,GBP3,PARP9,RAB20,CASP1,PARP14,IFITM3,CALCOCO2,GCH1,NUB1,VAMP3	T0_V_T4_down
query_1	2.40229e-12	177	292	31	0.106164	0.175141	GO:0042742	GO:BP	defense response to bacterium	FCGR1A,GBP5,GBP6,GBP1,GBP2,GBP4,NOD2,IL1B,SLAMF8,H2BC12,GBP3,CASP4,FCER1G,CASP1,ANXA3,RNF213,NLRC4,HP,H2BC6,RBCK1,ZNFX1,IGHA1,BCL3,S100A9,H2BC21,HLA-E,PRKCD,GRN,JCHAIN,S100A8,CLEC4D	T0_V_T3_down
query_1	2.69348e-12	2800	292	125	0.428082	0.0446429	GO:0006950	GO:BP	response to stress	FCGR1A,BATF2,SERPING1,GBP5,GBP6,C1QC,AIM2,GBP1,APOL1,APOL2,KREMEN1,RMI2,GBP2,CEACAM1,SCARF1,FBXO6,IRF1,GBP4,UBE2L6,SMARCD3,IL27,TIFA,TAP1,ATF3,TRIM21,POLB,ADM,STAT1,PLAUR,RHBDF2,CD177,RTP4,RAB20,NOD2,PML,PARP9,SOCS3,IL1B,SLAMF8,CARD16,NECTIN2,TRIM22,H2BC12,GBP3,TLR5,MYL9,FANCA,IFITM3,TNFAIP6,TRAFD1,CASP4,FCER1G,CASP1,ANXA3,IFIT3,CLU,MOV10,PARP14,MYOF,HPSE,PIK3AP1,DTX3L,MSRB2,FFAR2,LGALS3BP,FAS,GA…	T0_V_T3_down
query_1	3.07578e-12	825	271	54	0.199262	0.0654545	GO:0002684	GO:BP	positive regulation of immune system process	FCGR1A,CD274,GBP5,SERPING1,PDCD1LG2,GBP1,C1QC,LIMK1,GBP2,AIM2,DUSP3,IRF1,CEACAM1,ICAM1,TIFA,SMARCD3,CD177,PARP9,IL15RA,CASP1,IL1B,NOD2,SOCS1,CLU,TLR5,NECTIN2,FCER1G,PIK3AP1,GAS6,ITGA2B,HLA-E,CCR2,RSAD2,BTN3A1,PLSCR1,IFI35,FFAR2,FFAR3,NMI,CLEC4D,HLA-C,RBCK1,NLRC4,BCL6,IFIH1,BTN3A2,ZNFX1,ZBP1,HCAR2,MR1,CD300A,IL12RB1,BTN3A3,IFI16	T0_V_T4_down
query_1	3.07578e-12	325	271	33	0.121771	0.101538	GO:0009615	GO:BP	response to virus	GBP5,GBP1,GBP2,AIM2,IRF1,STAT1,IL27,TRIM21,TRIM22,GBP3,RTP4,PML,PARP9,IFIT3,CASP1,MOV10,IL1B,DTX3L,CLU,IFITM3,NPC2,RSAD2,PLSCR1,STAT2,NMI,MAPK14,IFIH1,ACTA2,ZNFX1,ZBP1,FGL2,IL12RB1,IFI16	T0_V_T4_down
query_1	5.26358e-12	458	265	43	0.162264	0.0938865	GO:0009617	GO:BP	response to bacterium	CD274,PDCD1LG2,FAM20A,GBP6,FCGR1A,GBP5,GBP1,JCHAIN,IGHA1,ADM,IL27,SLAMF8,ANXA3,IGHA2,TLR5,GBP3,H2BC12,IGHG2,IL1B,IGKV3-20,GCH1,IGHG1,GBP4,GBP2,CARD16,FCER1G,FCAR,SBNO2,CASP1,NLRC4,CLEC4D,OAS1,H2BC6,MAPK14,NAIP,NOD2,HLA-E,CASP4,OAS3,S100A9,H2BC21,HP,FPR2	T0_V_T2_down
query_1	9.58458e-12	2800	281	120	0.427046	0.0428571	GO:0006950	GO:BP	response to stress	FCGR1A,GBP5,BATF2,SERPING1,GBP6,GBP1,C1QC,APOL1,SCARF1,GBP2,APOL2,AIM2,KREMEN1,FBXO6,GBP4,IRF1,RMI2,UBE2L6,CEACAM1,TAP1,TIFA,SMARCD3,STAT1,IL27,POLB,RHBDF2,ATF3,SLAMF8,TRIM21,TRIM22,CD177,GBP3,RTP4,PML,TNFAIP6,H2BC12,ADM,PARP9,PLAUR,RAB20,IFIT3,MYL9,CASP1,CARD16,PARP14,FANCA,TRAFD1,MOV10,IL1B,NOD2,MARCO,DTX3L,CLU,MYOF,IFITM3,TLR5,NECTIN2,SOCS3,CASP4,FCER1G,PIK3AP1,FAS,RNF213,CALCOCO2,ANXA3,LGALS3…	T0_V_T4_down
query_1	1.09606e-11	573	271	43	0.158672	0.0750436	GO:0050778	GO:BP	positive regulation of immune response	FCGR1A,CD274,GBP5,SERPING1,GBP1,C1QC,LIMK1,GBP2,AIM2,DUSP3,IRF1,CEACAM1,TIFA,CD177,PARP9,CASP1,IL1B,NOD2,CLU,TLR5,NECTIN2,FCER1G,PIK3AP1,HLA-E,CCR2,RSAD2,BTN3A1,PLSCR1,IFI35,FFAR2,NMI,HLA-C,RBCK1,NLRC4,IFIH1,BTN3A2,ZNFX1,ZBP1,MR1,CD300A,IL12RB1,BTN3A3,IFI16	T0_V_T4_down
query_1	1.25973e-11	325	284	33	0.116197	0.101538	GO:0009615	GO:BP	response to virus	GBP5,AIM2,GBP1,GBP2,IRF1,IL27,TRIM21,STAT1,RTP4,PML,PARP9,IL1B,TRIM22,GBP3,IFITM3,CASP1,IFIT3,CLU,MOV10,DTX3L,NPC2,PLSCR1,ACTA2,NMI,ZNFX1,BCL3,ZBP1,IRF2,STAT2,MAPK14,RSAD2,TRIM38,IFI16	T0_V_T3_down
query_1	1.58974e-11	564	292	43	0.14726	0.0762411	REAC:R-HSA-1280215	REAC	Cytokine Signaling in Immune system	GBP6,FCGR1A,TIFA,GBP5,GBP1,DUSP3,SOCS3,LMNB1,IL27,SDC1,GBP3,ICAM1,TRIM22,OSM,IL1B,IGHG1,UBE2L6,IRF1,GBP4,GBP2,IFIT3,IL15RA,HLA-DPA1,TRIM21,CASP1,PML,STAT1,TNFRSF17,CCR2,IFITM3,OAS1,MAPK14,NOD2,HLA-E,OAS3,SOCS1,RSAD2,HLA-DRA,IFI27,BCL6,LTBR,XAF1,PSMB8	T0_V_T2_down
query_1	1.82362e-11	1163	285	67	0.235088	0.0576096	GO:0002682	GO:BP	regulation of immune system process	CD274,FCGR1A,SERPING1,GBP5,PDCD1LG2,C1QC,AIM2,GBP1,GBP2,CEACAM1,ICAM1,LIMK1,DUSP3,IRF1,SMARCD3,IL27,TIFA,TRIM21,STAT1,RHBDF2,CD177,IL15RA,NOD2,PARP9,IL1B,SLAMF8,NECTIN2,TLR5,FANCA,TNFAIP6,TRAFD1,FCER1G,CASP1,CLU,PADI2,PARP14,PIK3AP1,FFAR2,GAS6,HCAR2,ITGA2B,NLRC4,BCL6,PLSCR1,LY96,RBCK1,NMI,IFI35,ZNFX1,IGHA1,TMEM176A,ZBP1,TMEM176B,SOCS1,BTN3A1,ALPK1,STAT3,CD300A,STAT2,MAPK14,HLA-E,PRKCD,RSAD2,LILRB…	T0_V_T3_down
query_1	2.62228e-11	249	271	28	0.103321	0.11245	GO:0051607	GO:BP	defense response to virus	GBP5,GBP1,GBP2,AIM2,IRF1,STAT1,IL27,TRIM21,TRIM22,GBP3,RTP4,PML,PARP9,IFIT3,CASP1,MOV10,IL1B,DTX3L,IFITM3,RSAD2,PLSCR1,STAT2,IFIH1,ZNFX1,ZBP1,FGL2,IL12RB1,IFI16	T0_V_T4_down
query_1	2.9832e-11	573	291	44	0.151203	0.0767888	GO:0050778	GO:BP	positive regulation of immune response	C1QC,CD274,CD177,SERPING1,AIM2,FCGR1A,TIFA,GBP5,GBP1,DUSP3,LIMK1,IGHA1,CEACAM1,IGHA2,TLR5,IGHG2,IL1B,IGHG1,IRF1,VSIG4,PLSCR1,GBP2,FCER1G,HLA-DPA1,CASP1,NLRC4,NECTIN2,CCR2,IGLC3,OAS1,PIK3AP1,BMX,NAIP,NOD2,HLA-E,OAS3,RSAD2,PARP9,HLA-DRA,FPR2,DDX60,CD38,LILRB4,IFI16	T0_V_T2_down
query_1	3.28564e-11	55	212	14	0.0660377	0.254545	REAC:R-HSA-909733	REAC	Interferon alpha/beta signaling	GBP2,IRF1,STAT1,PSMB8,IFIT3,SOCS1,IFITM3,SOCS3,HLA-E,RSAD2,IFI35,STAT2,XAF1,HLA-C	T0_V_T4_down
query_1	3.42558e-11	1382	274	69	0.251825	0.0499276	REAC:R-HSA-1643685	REAC	Disease	SERPING1,IGHV3-7,FCGR1A,IGHV4-39,RMI2,SDC3,IGLV1-40,IGLV6-57,IGKV1-5,IGKV2-30,LMNB1,IGLV3-1,KREMEN1,IGLV2-14,IGKV3-15,IGLV1-47,IGKV4-1,IGLV3-19,IGHV3-33,IGLV2-8,IGKV1-16,IGHV3-23,SDC1,IGLV3-21,IGHV4-59,IGLV1-44,TLR5,IGLV2-23,RHBDF2,H2BC12,IGHG2,IGLV3-25,IGLC2,ADCY3,IGHV1-2,IL1B,TCN2,IGKV3-20,IGHG1,IGLV2-11,IGKV3-11,IGHV1-46,GYG1,IGKV1-12,IGKV1-39,IGHV2-70,IGHV3-30,IGKV3D-20,CASP1,H2BC5,IGHV2-5,PM…	T0_V_T2_down
query_1	4.15346e-11	682	276	49	0.177536	0.0718475	GO:0034097	GO:BP	response to cytokine	CD274,GBP5,GBP6,GBP1,GBP2,AIM2,GBP4,IRF1,CEACAM1,ICAM1,STAT1,TRIM21,GBP3,PML,PARP9,IL15RA,RAB20,CASP1,CARD16,PARP14,IL1B,SOCS1,IFITM3,SELL,SOCS3,CASP4,FCER1G,FAS,PADI2,CALCOCO2,GAS6,GCH1,CCR2,NUB1,VAMP3,PLSCR1,CCRL2,STAT2,GBA1,XAF1,OSM,MAPK14,SBNO2,IFIH1,ZBP1,CXCL16,IL12RB1,IFI16,JAK3	T0_V_T4_down
query_1	4.98255e-11	583	277	44	0.158845	0.0754717	GO:0031347	GO:BP	regulation of defense response	SERPING1,AIM2,FCGR1A,TIFA,GBP5,SOCS3,IL27,CEACAM1,SLAMF8,TLR5,TNFAIP6,RHBDF2,TRIM22,OSM,IL1B,IRF1,VSIG4,PLSCR1,GBP2,GBA1,CARD16,TRIM21,SBNO2,CASP1,PML,STAT1,NLRC4,NECTIN2,CCR2,OAS1,PIK3AP1,MAPK14,NAIP,NOD2,HLA-E,CASP4,OAS3,RSAD2,PARP9,S100A9,FPR2,BCL6,DDX60,ZFP36	T0_V_T2_down
query_1	4.99803e-11	825	282	53	0.187943	0.0642424	GO:0002684	GO:BP	positive regulation of immune system process	C1QC,CD274,PDCD1LG2,CD177,SERPING1,AIM2,FCGR1A,TIFA,GBP5,GBP1,DUSP3,LIMK1,IGHA1,SMARCD3,CEACAM1,IGHA2,TLR5,IGHG2,ICAM1,IL1B,IGHG1,IRF1,VSIG4,GAS6,PLSCR1,GBP2,IL15RA,FCER1G,HLA-DPA1,FCAR,CASP1,MZB1,NLRC4,NECTIN2,CCR2,IGLC3,CLEC4D,OAS1,PIK3AP1,BMX,NAIP,NOD2,HLA-E,OAS3,SOCS1,RSAD2,PARP9,HLA-DRA,FPR2,BCL6,DDX60,CD38,LILRB4	T0_V_T2_down
query_1	7.73682e-11	682	291	50	0.171821	0.0733138	GO:0034097	GO:BP	response to cytokine	CD274,AIM2,GBP6,GBP5,GBP1,SOCS3,CEACAM1,GBP3,ICAM1,OSM,IL1B,GCH1,IRF1,SELL,GBP4,GAS6,RAB20,PLSCR1,GBP2,GBA1,CARD16,IL15RA,FCER1G,HLA-DPA1,FCAR,TRIM21,CCRL2,SBNO2,CASP1,PML,STAT1,TNFRSF17,CCR2,IFITM3,OAS1,PADI2,MAPK14,NAIP,CASP4,OAS3,SOCS1,PARP9,IFI27,CXCL16,VAMP3,ZFP36,CD38,LILRB4,XAF1,IFI16	T0_V_T2_down
query_1	1.06195e-10	31	272	12	0.0441176	0.387097	WP:WP619	WP	Type II interferon signaling	GBP1,ICAM1,IRF1,TAP1,STAT1,SOCS3,IL1B,PSMB9,IRF2,SOCS1,STAT2,PRKCD	T0_V_T3_down
query_1	1.19184e-10	339	284	32	0.112676	0.0943953	GO:0045088	GO:BP	regulation of innate immune response	SERPING1,GBP5,AIM2,GBP2,CEACAM1,IRF1,TIFA,TRIM21,NOD2,PARP9,SLAMF8,NECTIN2,TLR5,TRAFD1,CASP1,PARP14,PIK3AP1,FFAR2,NLRC4,PLSCR1,LY96,NMI,IFI35,ZNFX1,ZBP1,ALPK1,CD300A,STAT2,HLA-E,RSAD2,GRN,IFI16	T0_V_T3_down
query_1	1.55611e-10	106	224	18	0.0803571	0.169811	GO:0034341	GO:BP	response to type II interferon	GBP5,GBP6,GBP1,GBP2,IRF1,GBP4,TRIM21,STAT1,RAB20,PARP9,GBP3,IFITM3,CASP1,PARP14,CALCOCO2,GCH1,VAMP3,CXCL16	T0_V_T3_down
query_1	1.86725e-10	790	277	52	0.187726	0.0658228	GO:0032101	GO:BP	regulation of response to external stimulus	SERPING1,AIM2,SCARF1,FCGR1A,TIFA,GBP5,DUSP3,SOCS3,KREMEN1,IL27,CEACAM1,SLAMF8,TLR5,TNFAIP6,RHBDF2,TRIM22,OSM,IL1B,GRIN3A,HPSE,IRF1,VSIG4,GAS6,PLSCR1,GBP2,GBA1,CARD16,TRIM21,SBNO2,CASP1,PML,STAT1,NLRC4,NECTIN2,CCR2,OAS1,PIK3AP1,PADI2,PLAUR,MAPK14,NAIP,NOD2,HLA-E,CASP4,OAS3,RSAD2,PARP9,S100A9,FPR2,BCL6,DDX60,ZFP36	T0_V_T2_down
query_1	2.45348e-10	1163	282	64	0.22695	0.0550301	GO:0002682	GO:BP	regulation of immune system process	C1QC,CD274,PDCD1LG2,CD177,SERPING1,AIM2,FCGR1A,TIFA,GBP5,GBP1,DUSP3,LIMK1,IGHA1,SMARCD3,IL27,CEACAM1,SLAMF8,IGHA2,TLR5,TNFAIP6,RHBDF2,IGHG2,ICAM1,IL1B,IGHG1,IRF1,VSIG4,GAS6,PLSCR1,GBP2,IL15RA,FCER1G,HLA-DPA1,FCAR,TRIM21,CASP1,MZB1,STAT1,NLRC4,NECTIN2,CCR2,IGLC3,CLEC4D,OAS1,PIK3AP1,PADI2,BMX,TMEM176B,MAPK14,NAIP,NOD2,HLA-E,OAS3,SOCS1,FCGR2A,RSAD2,PARP9,HLA-DRA,FPR2,BCL6,DDX60,ZFP36,CD38,LILRB4	T0_V_T2_down
query_1	2.57605e-10	434	291	36	0.123711	0.0829493	GO:0002253	GO:BP	activation of immune response	C1QC,SERPING1,AIM2,TIFA,GBP5,GBP1,DUSP3,LIMK1,IGHA1,CEACAM1,IGHA2,TLR5,IGHG2,IL1B,IGHG1,IRF1,VSIG4,PLSCR1,GBP2,FCER1G,CASP1,NLRC4,NECTIN2,IGLC3,OAS1,PIK3AP1,BMX,NAIP,NOD2,OAS3,RSAD2,FPR2,DDX60,CD38,LILRB4,IFI16	T0_V_T2_down
query_1	2.61014e-10	419	282	34	0.120567	0.0811456	GO:0002764	GO:BP	immune response-regulating signaling pathway	AIM2,FCGR1A,TIFA,GBP5,GBP1,DUSP3,LIMK1,IGHA1,CEACAM1,IGHA2,TLR5,IGHG2,IGHG1,IRF1,PLSCR1,GBP2,FCER1G,FCAR,CASP1,NLRC4,NECTIN2,IGLC3,CLEC4D,OAS1,PIK3AP1,BMX,NAIP,NOD2,OAS3,RSAD2,FPR2,DDX60,CD38,LILRB4	T0_V_T2_down
query_1	2.66874e-10	55	292	14	0.0479452	0.254545	REAC:R-HSA-909733	REAC	Interferon alpha/beta signaling	SOCS3,IRF1,GBP2,IFIT3,STAT1,IFITM3,OAS1,HLA-E,OAS3,SOCS1,RSAD2,IFI27,XAF1,PSMB8	T0_V_T2_down
query_1	3.83158e-10	31	262	11	0.0419847	0.354839	GO:0070269	GO:BP	pyroptosis	AIM2,GBP5,GBP1,GBP3,GBP2,TRIM21,CASP1,NLRC4,NAIP,CASP4,IFI27	T0_V_T2_down
query_1	5.38014e-10	249	284	27	0.0950704	0.108434	GO:0051607	GO:BP	defense response to virus	GBP5,AIM2,GBP1,GBP2,IRF1,IL27,TRIM21,STAT1,RTP4,PML,PARP9,IL1B,TRIM22,GBP3,IFITM3,CASP1,IFIT3,MOV10,DTX3L,PLSCR1,ZNFX1,ZBP1,IRF2,STAT2,RSAD2,TRIM38,IFI16	T0_V_T3_down
query_1	5.4082e-10	2053	286	105	0.367133	0.0511447	GO:0005615	GO:CC	extracellular space	C1QC,CD274,CD177,FAM20A,SERPING1,IGHV3-7,GBP6,JCHAIN,IGLV1-40,IGLV6-57,IGKV1-5,IGKV2-30,IGHA1,IGLV3-1,ADM,IL27,IGLV2-14,CEACAM1,APOL4,IGKV3-15,IGLV1-47,IGKV4-1,IGLV3-19,IGLV2-8,IGKV1-16,IGHV3-23,SDC1,IGLV3-21,IGLV1-44,IGKV2D-29,ANXA3,IGHA2,IGLV2-23,TNFAIP6,H2BC12,IGHG2,APOL1,WARS1,IGLV3-25,IGLC2,ICAM1,OSM,MYOF,IL1B,TCN2,VAMP5,LAP3,IGLV3-10,LGALS3BP,IGKV3-20,IGHG1,HPSE,IGLV2-11,SELL,IGKV3-11,GAS6,…	T0_V_T2_down
query_1	6.37398e-10	458	292	42	0.143836	0.0917031	GO:0009617	GO:BP	response to bacterium	CD274,FCGR1A,GBP5,PDCD1LG2,GBP6,FAM20A,GBP1,GBP2,GBP4,IL27,ADM,NOD2,IL1B,SLAMF8,CARD16,H2BC12,GBP3,TLR5,CASP4,FCER1G,CASP1,ANXA3,RNF213,GCH1,NLRC4,HP,H2BC6,LY96,RBCK1,ZNFX1,IGHA1,BCL3,SOD2,S100A9,H2BC21,MAPK14,HLA-E,PRKCD,GRN,JCHAIN,S100A8,CLEC4D	T0_V_T3_down
query_1	7.16532e-10	434	284	35	0.123239	0.0806452	GO:0002253	GO:BP	activation of immune response	SERPING1,GBP5,C1QC,AIM2,GBP1,GBP2,CEACAM1,LIMK1,DUSP3,IRF1,TIFA,NOD2,IL1B,NECTIN2,TLR5,FCER1G,CASP1,CLU,PIK3AP1,FFAR2,NLRC4,PLSCR1,LY96,RBCK1,NMI,IFI35,ZNFX1,IGHA1,ZBP1,BTN3A1,ALPK1,CD300A,PRKCD,RSAD2,IFI16	T0_V_T3_down
query_1	8.40285e-10	434	271	34	0.125461	0.078341	GO:0002253	GO:BP	activation of immune response	GBP5,SERPING1,GBP1,C1QC,LIMK1,GBP2,AIM2,DUSP3,IRF1,CEACAM1,TIFA,CASP1,IL1B,NOD2,CLU,TLR5,NECTIN2,FCER1G,PIK3AP1,RSAD2,BTN3A1,PLSCR1,IFI35,FFAR2,NMI,RBCK1,NLRC4,IFIH1,BTN3A2,ZNFX1,ZBP1,CD300A,BTN3A3,IFI16	T0_V_T4_down
query_1	8.40285e-10	339	271	30	0.110701	0.0884956	GO:0045088	GO:BP	regulation of innate immune response	GBP5,SERPING1,GBP2,AIM2,IRF1,CEACAM1,TIFA,SLAMF8,TRIM21,PARP9,CASP1,PARP14,TRAFD1,NOD2,TLR5,NECTIN2,PIK3AP1,HLA-E,RSAD2,PLSCR1,IFI35,FFAR2,STAT2,NMI,NLRC4,IFIH1,ZNFX1,ZBP1,CD300A,IFI16	T0_V_T4_down
query_1	9.52182e-10	55	273	14	0.0512821	0.254545	REAC:R-HSA-909733	REAC	Interferon alpha/beta signaling	GBP2,IRF1,STAT1,SOCS3,IFITM3,IFIT3,PSMB8,IFI35,XAF1,IRF2,SOCS1,STAT2,HLA-E,RSAD2	T0_V_T3_down
query_1	9.52182e-10	869	292	53	0.181507	0.0609896	REAC:R-HSA-168249	REAC	Innate Immune System	FCGR1A,SERPING1,C1QC,AIM2,CEACAM1,LIMK1,DUSP3,UBE2L6,TIFA,TRIM21,PLAUR,CD177,NOD2,IL1B,PSMB9,TLR5,TNFAIP6,GPR84,SELL,PSME2,CASP4,FCER1G,CASP1,CTSA,CLU,LTA4H,PADI2,HPSE,PSMB8,GNS,NPC2,NLRC4,HP,LY96,GYG1,PSME1,ZBP1,GM2A,S100A9,SOCS1,DYNLT1,ALPK1,SERPINA1,CD300A,IGLV6-57,MAPK14,HLA-E,PRKCD,LILRB3,GRN,IFI16,S100A8,CLEC4D	T0_V_T3_down
query_1	1.49902e-09	3381	212	119	0.561321	0.0351967	GO:0005886	GO:CC	plasma membrane	CD274,PDCD1LG2,CD177,NRN1,IGHV3-7,SCARF1,FCGR1A,IGHV4-39,SDC3,GBP1,IGLV1-40,IGHV3-21,IGLV6-57,IGKV1-5,DUSP3,IGKV2-30,PSTPIP2,SOCS3,LHFPL2,IGHA1,GPR84,IGHV3-15,IGLV3-1,KREMEN1,IGLV2-14,CEACAM1,CDCP1,IGHV6-1,IGKV3-15,IGLV1-47,IGKV4-1,IGLV3-19,SLC26A8,IGHV3-33,IGLV2-8,IGKV1-16,IGHV3-23,SDC1,IGLV3-21,IGHV4-59,IGLV1-44,IGKV2D-29,ANXA3,IGHA2,TLR5,IGHV1-18,IGHV4-4,IGLV2-23,RHBDF2,IGHG2,IGHV3-74,SLC6A12,…	T0_V_T2_down
query_1	1.85242e-09	89	103	12	0.116505	0.134831	GO:0071346	GO:BP	cellular response to type II interferon	GBP5,GBP6,GBP1,GBP2,GBP4,IRF1,STAT1,GBP3,PARP9,RAB20,CASP1,PARP14	T0_V_T4_down
query_1	2.14079e-09	264	291	29	0.0996564	0.109848	GO:0050727	GO:BP	regulation of inflammatory response	FCGR1A,AIM2,RHBDF2,NOD2,SOCS3,IL1B,SLAMF8,CARD16,FANCA,TNFAIP6,CASP4,CASP1,PIK3AP1,FFAR2,OSM,NLRC4,BCL6,GBA1,NMI,IFI35,ELF4,ZBP1,S100A9,STAT3,MAPK14,HLA-E,PRKCD,GRN,S100A8	T0_V_T3_down
query_1	2.23961e-09	106	269	18	0.0669145	0.169811	GO:0034341	GO:BP	response to type II interferon	GBP6,GBP5,GBP1,GBP3,GCH1,IRF1,GBP4,RAB20,GBP2,HLA-DPA1,FCAR,TRIM21,CASP1,STAT1,IFITM3,PARP9,CXCL16,VAMP3	T0_V_T2_down
query_1	2.39323e-09	31	129	9	0.0697674	0.290323	WP:WP619	WP	Type II interferon signaling	GBP1,IRF1,TAP1,ICAM1,STAT1,PSMB9,IL1B,SOCS1,SOCS3	T0_V_T4_down
query_1	3.20444e-09	606	276	41	0.148551	0.0676568	GO:0001817	GO:BP	regulation of cytokine production	CD274,GBP5,PDCD1LG2,GBP1,AIM2,IRF1,CEACAM1,STAT1,IL27,TRIM21,IGF2BP3,PML,CASP1,CARD16,IL1B,NOD2,SOCS1,CLU,TLR5,FCER1G,GAS6,HPSE,HLA-E,CCR2,RSAD2,BTN3A1,FFAR2,FFAR3,NMI,GBA1,XAF1,OSM,MAPK14,NLRC4,BCL6,IFIH1,BTN3A2,IL12RB1,BTN3A3,IFI16,JAK3	T0_V_T4_down
query_1	3.26247e-09	579	291	44	0.151203	0.0759931	GO:0006954	GO:BP	inflammatory response	FCGR1A,GBP5,AIM2,APOL2,GBP2,IL27,POLB,ADM,RHBDF2,NOD2,SOCS3,IL1B,SLAMF8,CARD16,TLR5,FANCA,TNFAIP6,CASP4,CASP1,CLU,PIK3AP1,FFAR2,OSM,NLRC4,BCL6,GBA1,HP,PLSCR1,LY96,NMI,IFI35,ELF4,CCRL2,ZBP1,S100A9,SERPINA1,STAT3,MAPK14,HLA-E,PRKCD,GRN,IFI16,APOL3,S100A8	T0_V_T3_down
query_1	3.26247e-09	573	284	40	0.140845	0.069808	GO:0050778	GO:BP	positive regulation of immune response	CD274,FCGR1A,SERPING1,GBP5,C1QC,AIM2,GBP1,GBP2,CEACAM1,LIMK1,DUSP3,IRF1,TIFA,CD177,NOD2,PARP9,IL1B,NECTIN2,TLR5,FCER1G,CASP1,CLU,PIK3AP1,FFAR2,NLRC4,PLSCR1,LY96,RBCK1,NMI,IFI35,ZNFX1,IGHA1,ZBP1,BTN3A1,ALPK1,CD300A,HLA-E,PRKCD,RSAD2,IFI16	T0_V_T3_down
query_1	3.51639e-09	403	272	32	0.117647	0.0794045	GO:0002831	GO:BP	regulation of response to biotic stimulus	CD274,SERPING1,AIM2,TIFA,GBP5,IL27,CEACAM1,SLAMF8,TLR5,TRIM22,IL1B,IRF1,VSIG4,PLSCR1,GBP2,CARD16,TRIM21,CASP1,PML,STAT1,NLRC4,NECTIN2,OAS1,PIK3AP1,NAIP,NOD2,HLA-E,OAS3,RSAD2,PARP9,FPR2,DDX60	T0_V_T2_down
query_1	3.62054e-09	249	291	26	0.0893471	0.104418	GO:0051607	GO:BP	defense response to virus	AIM2,GBP5,GBP1,IL27,GBP3,RTP4,TRIM22,IL1B,IRF1,PLSCR1,GBP2,IFIT3,TRIM21,CASP1,PML,STAT1,IFITM3,OAS1,MOV10,OAS3,IFI44L,RSAD2,PARP9,IFI27,DDX60,IFI16	T0_V_T2_down
query_1	3.64844e-09	9	121	6	0.0495868	0.666667	GO:0042571	GO:CC	immunoglobulin complex, circulating	JCHAIN,IGHA1,IGHA2,IGHG2,IGKV3-20,IGHG1	T0_V_T2_down
query_1	3.93597e-09	608	276	41	0.148551	0.0674342	GO:0001816	GO:BP	cytokine production	CD274,GBP5,PDCD1LG2,GBP1,AIM2,IRF1,CEACAM1,STAT1,IL27,TRIM21,IGF2BP3,PML,CASP1,CARD16,IL1B,NOD2,SOCS1,CLU,TLR5,FCER1G,GAS6,HPSE,HLA-E,CCR2,RSAD2,BTN3A1,FFAR2,FFAR3,NMI,GBA1,XAF1,OSM,MAPK14,NLRC4,BCL6,IFIH1,BTN3A2,IL12RB1,BTN3A3,IFI16,JAK3	T0_V_T4_down
query_1	3.95771e-09	31	233	10	0.0429185	0.322581	GO:0070269	GO:BP	pyroptosis	GBP5,AIM2,GBP1,GBP2,TRIM21,GBP3,CASP4,CASP1,NLRC4,ZBP1	T0_V_T3_down
query_1	4.35562e-09	3623	212	124	0.584906	0.0342258	GO:0071944	GO:CC	cell periphery	C1QC,SEPTIN4,CD274,PDCD1LG2,CD177,NRN1,SERPING1,IGHV3-7,SCARF1,FCGR1A,IGHV4-39,SDC3,GBP1,IGLV1-40,IGHV3-21,IGLV6-57,IGKV1-5,DUSP3,IGKV2-30,PSTPIP2,SOCS3,LHFPL2,IGHA1,GPR84,IGHV3-15,IGLV3-1,KREMEN1,IGLV2-14,CEACAM1,CDCP1,IGHV6-1,IGKV3-15,IGLV1-47,IGKV4-1,IGLV3-19,SLC26A8,IGHV3-33,IGLV2-8,IGKV1-16,IGHV3-23,SDC1,IGLV3-21,IGHV4-59,IGLV1-44,IGKV2D-29,ANXA3,IGHA2,TLR5,IGHV1-18,IGHV4-4,IGLV2-23,RHBDF2,I…	T0_V_T2_down
query_1	5.26831e-09	264	264	27	0.102273	0.102273	GO:0050727	GO:BP	regulation of inflammatory response	FCGR1A,AIM2,RHBDF2,SLAMF8,TNFAIP6,CASP1,CARD16,FANCA,IL1B,NOD2,SOCS3,CASP4,PIK3AP1,HLA-E,CCR2,IFI35,FFAR2,FFAR3,NMI,GBA1,OSM,MAPK14,NLRC4,SBNO2,BCL6,ZBP1,S100A9	T0_V_T4_down
query_1	5.63501e-09	682	285	46	0.161404	0.0674487	GO:0034097	GO:BP	response to cytokine	CD274,GBP5,GBP6,AIM2,GBP1,GBP2,CEACAM1,ICAM1,IRF1,GBP4,TRIM21,STAT1,IL15RA,RAB20,PML,PARP9,SOCS3,IL1B,CARD16,GBP3,IFITM3,SELL,CASP4,FCER1G,CASP1,PADI2,PARP14,FAS,GAS6,CALCOCO2,OSM,GCH1,GBA1,PLSCR1,VAMP3,CCRL2,XAF1,CXCL16,ZBP1,SOCS1,NUB1,STAT3,STAT2,MAPK14,IFI16,JAK3	T0_V_T3_down
query_1	5.6519e-09	396	282	31	0.109929	0.0782828	GO:0002757	GO:BP	immune response-activating signaling pathway	AIM2,TIFA,GBP5,GBP1,DUSP3,LIMK1,IGHA1,CEACAM1,IGHA2,TLR5,IGHG2,IGHG1,IRF1,PLSCR1,GBP2,FCER1G,CASP1,NLRC4,NECTIN2,IGLC3,OAS1,PIK3AP1,BMX,NAIP,NOD2,OAS3,RSAD2,FPR2,DDX60,CD38,LILRB4	T0_V_T2_down
query_1	6.57456e-09	825	273	48	0.175824	0.0581818	GO:0002684	GO:BP	positive regulation of immune system process	CD274,FCGR1A,SERPING1,GBP5,PDCD1LG2,C1QC,AIM2,GBP1,GBP2,CEACAM1,ICAM1,LIMK1,DUSP3,IRF1,SMARCD3,TIFA,CD177,IL15RA,NOD2,PARP9,IL1B,NECTIN2,TLR5,FCER1G,CASP1,CLU,PIK3AP1,FFAR2,GAS6,HCAR2,ITGA2B,NLRC4,BCL6,PLSCR1,LY96,RBCK1,NMI,IFI35,ZNFX1,IGHA1,ZBP1,SOCS1,BTN3A1,ALPK1,CD300A,HLA-E,PRKCD,RSAD2	T0_V_T3_down
query_1	7.05343e-09	31	249	10	0.0401606	0.322581	GO:0070269	GO:BP	pyroptosis	GBP5,GBP1,GBP2,AIM2,TRIM21,GBP3,CASP1,CASP4,NLRC4,ZBP1	T0_V_T4_down
query_1	7.14979e-09	869	271	49	0.180812	0.0563867	REAC:R-HSA-168249	REAC	Innate Immune System	FCGR1A,SERPING1,C1QC,LIMK1,AIM2,DUSP3,UBE2L6,CEACAM1,TIFA,TRIM21,CD177,PSMB9,PSME2,TNFAIP6,PLAUR,GPR84,PSMB8,LTA4H,CASP1,CTSA,IL1B,NOD2,SOCS1,CLU,TLR5,NPC2,SELL,GNS,CASP4,FCER1G,PADI2,PSME1,HPSE,HLA-E,GYG1,CCR2,CLEC4D,HLA-C,MAPK14,GM2A,NLRC4,IFIH1,ZBP1,FGL2,PSMB10,S100A9,CD300A,HP,IFI16	T0_V_T4_down
query_1	8.14223e-09	5765	287	205	0.714286	0.0355594	GO:0050896	GO:BP	response to stimulus	C1QC,SEPTIN4,CD274,PDCD1LG2,CD177,FAM20A,SERPING1,AIM2,IGHV3-7,GBP6,SCARF1,FCGR1A,IGHV4-39,TIFA,BATF2,GBP5,RMI2,GBP1,JCHAIN,IGLV1-40,IGHV3-21,IGLV6-57,IGKV1-5,DUSP3,LIMK1,IGKV2-30,SOCS3,IGHA1,GPR84,IGHV3-15,IGLV3-1,SMARCD3,ADM,KREMEN1,IL27,IGLV2-14,CEACAM1,IGHV6-1,IGKV3-15,IGLV1-47,IGKV4-1,CASP5,IGLV3-19,IGHV3-33,IGLV2-8,IGKV1-16,IGHV3-23,SDC1,IGLV3-21,IGHV4-59,IGLV1-44,IGKV2D-29,SLAMF8,ATF3,ANXA…	T0_V_T2_down
query_1	9.56174e-09	860	267	48	0.179775	0.055814	GO:0001775	GO:BP	cell activation	CD274,BATF2,PDCD1LG2,DUSP3,IRF1,CEACAM1,ICAM1,SMARCD3,IL27,SLAMF8,CD177,IL15RA,MYL9,FANCA,IL1B,NOD2,SOCS1,CLU,NECTIN2,SOCS3,FCER1G,ANXA3,GAS6,DYSF,HLA-E,CCR2,RSAD2,NBN,TREML1,BTN3A1,PLSCR1,BAK1,IFI35,SLAMF7,NMI,GBA1,CLEC4D,MAPK14,PLEK,SBNO2,BCL6,ACTA2,FGL2,LTBR,MR1,PSMB10,CD300A,IL12RB1	T0_V_T4_down
query_1	1.29176e-08	141	231	18	0.0779221	0.12766	KEGG:04621	KEGG	NOD-like receptor signaling pathway	AIM2,GBP5,GBP1,CASP5,GBP3,IL1B,GBP4,GBP2,CARD16,CASP1,STAT1,NLRC4,OAS1,MAPK14,NAIP,NOD2,CASP4,OAS3	T0_V_T2_down
query_1	1.32197e-08	20	195	8	0.0410256	0.4	WP:WP4197	WP	Immune response to tuberculosis	IRF1,TAP1,STAT1,PSMB8,IFIT3,SOCS1,IFI35,STAT2	T0_V_T4_down
query_1	1.48332e-08	366	271	30	0.110701	0.0819672	GO:0031349	GO:BP	positive regulation of defense response	FCGR1A,GBP5,GBP2,AIM2,IRF1,TIFA,PARP9,CASP1,IL1B,NOD2,TLR5,NECTIN2,CASP4,PIK3AP1,HLA-E,CCR2,RSAD2,PLSCR1,IFI35,FFAR2,FFAR3,NMI,OSM,NLRC4,IFIH1,ZNFX1,ZBP1,S100A9,CD300A,IFI16	T0_V_T4_down
query_1	1.90763e-08	177	278	25	0.0899281	0.141243	GO:0042742	GO:BP	defense response to bacterium	FCGR1A,GBP5,GBP6,GBP1,GBP2,GBP4,SLAMF8,GBP3,H2BC12,CASP1,IL1B,NOD2,CASP4,FCER1G,RNF213,ANXA3,HLA-E,CLEC4D,RBCK1,NLRC4,ZNFX1,MR1,S100A9,HP,H2BC21	T0_V_T4_down
query_1	1.99525e-08	366	291	31	0.106529	0.0846995	GO:0031349	GO:BP	positive regulation of defense response	FCGR1A,GBP5,AIM2,GBP2,IRF1,TIFA,NOD2,PARP9,IL1B,NECTIN2,TLR5,CASP4,CASP1,PIK3AP1,FFAR2,OSM,NLRC4,PLSCR1,LY96,NMI,IFI35,ZNFX1,ZBP1,S100A9,ALPK1,CD300A,HLA-E,RSAD2,GRN,IFI16,S100A8	T0_V_T3_down
query_1	2.77806e-08	514	276	37	0.134058	0.0719844	GO:0002252	GO:BP	immune effector process	FCGR1A,SERPING1,C1QC,LIMK1,CEACAM1,ICAM1,IL27,SLAMF8,CD177,IL1B,NOD2,CLU,NECTIN2,SOCS3,FCER1G,ANXA3,DYSF,HLA-E,CCR2,RSAD2,NBN,IFI35,FFAR2,SLAMF7,FFAR3,NMI,CLEC4D,HLA-C,SBNO2,BCL6,BTN3A2,FGL2,MR1,CD300A,IL12RB1,BTN3A3,JAK3	T0_V_T4_down
query_1	2.83323e-08	606	285	40	0.140351	0.0660066	GO:0001817	GO:BP	regulation of cytokine production	CD274,GBP5,PDCD1LG2,AIM2,GBP1,CEACAM1,IRF1,IL27,TRIM21,STAT1,NOD2,PML,IL1B,CARD16,IGF2BP3,TLR5,FCER1G,CASP1,CLU,HPSE,FFAR2,GAS6,OSM,NLRC4,BCL6,GBA1,LY96,NMI,ELF4,XAF1,BCL3,SOCS1,BTN3A1,STAT3,MAPK14,HLA-E,RSAD2,TRIM38,IFI16,JAK3	T0_V_T3_down
query_1	2.88204e-08	291	284	28	0.0985915	0.0962199	GO:0032102	GO:BP	negative regulation of response to external stimulus	SERPING1,KREMEN1,CEACAM1,DUSP3,TRIM21,PLAUR,RHBDF2,NOD2,GRIN3A,SOCS3,SLAMF8,CARD16,TNFAIP6,TRAFD1,PADI2,PARP14,GBA1,NMI,ELF4,STAT3,STAT2,MAPK14,HLA-E,SEMA4A,PRKCD,GRN,TRIM38,IFI16	T0_V_T3_down
query_1	3.0103e-08	756	276	44	0.15942	0.0582011	GO:0045321	GO:BP	leukocyte activation	CD274,BATF2,PDCD1LG2,DUSP3,IRF1,CEACAM1,ICAM1,SMARCD3,IL27,SLAMF8,CD177,IL15RA,FANCA,IL1B,NOD2,SOCS1,CLU,NECTIN2,SOCS3,FCER1G,ANXA3,GAS6,DYSF,HLA-E,CCR2,RSAD2,NBN,BTN3A1,PLSCR1,BAK1,IFI35,SLAMF7,NMI,GBA1,CLEC4D,SBNO2,BCL6,FGL2,LTBR,MR1,PSMB10,CD300A,IL12RB1,JAK3	T0_V_T4_down
query_1	3.01534e-08	89	133	12	0.0902256	0.134831	GO:0071346	GO:BP	cellular response to type II interferon	GBP5,GBP6,GBP1,GBP2,IRF1,GBP4,STAT1,RAB20,PARP9,GBP3,CASP1,PARP14	T0_V_T3_down
query_1	3.26569e-08	608	285	40	0.140351	0.0657895	GO:0001816	GO:BP	cytokine production	CD274,GBP5,PDCD1LG2,AIM2,GBP1,CEACAM1,IRF1,IL27,TRIM21,STAT1,NOD2,PML,IL1B,CARD16,IGF2BP3,TLR5,FCER1G,CASP1,CLU,HPSE,FFAR2,GAS6,OSM,NLRC4,BCL6,GBA1,LY96,NMI,ELF4,XAF1,BCL3,SOCS1,BTN3A1,STAT3,MAPK14,HLA-E,RSAD2,TRIM38,IFI16,JAK3	T0_V_T3_down
query_1	4.23199e-08	579	271	40	0.147601	0.0690846	GO:0006954	GO:BP	inflammatory response	FCGR1A,GBP5,GBP2,APOL2,AIM2,IL27,POLB,RHBDF2,SLAMF8,TNFAIP6,ADM,CASP1,CARD16,FANCA,IL1B,NOD2,CLU,TLR5,SOCS3,CASP4,PIK3AP1,HLA-E,APOL3,CCR2,PLSCR1,IFI35,FFAR2,FFAR3,CCRL2,NMI,GBA1,OSM,MAPK14,NLRC4,SBNO2,BCL6,ZBP1,S100A9,HP,IFI16	T0_V_T4_down
query_1	4.32073e-08	613	291	42	0.14433	0.0685155	GO:0071345	GO:BP	cellular response to cytokine stimulus	AIM2,GBP6,GBP5,GBP1,SOCS3,CEACAM1,GBP3,ICAM1,OSM,IL1B,IRF1,GBP4,GAS6,RAB20,GBP2,GBA1,CARD16,IL15RA,FCER1G,HLA-DPA1,FCAR,CCRL2,SBNO2,CASP1,PML,STAT1,TNFRSF17,CCR2,IFITM3,OAS1,PADI2,MAPK14,NAIP,CASP4,OAS3,SOCS1,PARP9,IFI27,VAMP3,ZFP36,LILRB4,IFI16	T0_V_T2_down
query_1	5.28146e-08	141	284	19	0.0669014	0.134752	KEGG:04621	KEGG	NOD-like receptor signaling pathway	GBP5,AIM2,GBP1,GBP2,GBP4,CASP5,STAT1,NOD2,IL1B,CARD16,GBP3,CASP4,CASP1,NLRC4,RBCK1,STAT2,MAPK14,PRKCD,IFI16	T0_V_T3_down
query_1	5.86186e-08	5	199	5	0.0251256	1	GO:0071745	GO:CC	IgA immunoglobulin complex	JCHAIN,IGHA1,IGHA2,IGKV3-20,IGLC3	T0_V_T2_down
query_1	5.86186e-08	16	228	7	0.0307018	0.4375	GO:0061702	GO:CC	canonical inflammasome complex	AIM2,CASP5,CARD16,CASP1,NLRC4,NAIP,CASP4	T0_V_T2_down
query_1	7.46288e-08	458	278	37	0.133094	0.080786	GO:0009617	GO:BP	response to bacterium	FCGR1A,CD274,GBP5,PDCD1LG2,GBP6,GBP1,GBP2,FAM20A,GBP4,IL27,SLAMF8,GBP3,H2BC12,ADM,CASP1,CARD16,IL1B,NOD2,TLR5,CASP4,FCER1G,RNF213,ANXA3,GCH1,HLA-E,SOD2,CLEC4D,MAPK14,RBCK1,NLRC4,SBNO2,ZNFX1,MR1,S100A9,HP,LOXL1,H2BC21	T0_V_T4_down
query_1	8.04426e-08	293	284	26	0.0915493	0.0887372	GO:0002833	GO:BP	positive regulation of response to biotic stimulus	CD274,GBP5,AIM2,GBP2,IRF1,TIFA,NOD2,PARP9,NECTIN2,TLR5,CASP1,PIK3AP1,FFAR2,NLRC4,PLSCR1,LY96,NMI,IFI35,ZNFX1,ZBP1,ALPK1,CD300A,HLA-E,RSAD2,GRN,IFI16	T0_V_T3_down
query_1	8.46456e-08	1650	271	74	0.273063	0.0448485	GO:0048584	GO:BP	positive regulation of response to stimulus	FCGR1A,CD274,GBP5,SERPING1,SEPTIN4,GBP1,C1QC,LIMK1,SCARF1,GBP2,AIM2,DUSP3,IRF1,CEACAM1,ICAM1,TIFA,SMARCD3,SECTM1,ATF3,TRIM21,TRIM22,CD177,PML,GADD45B,PARP9,PLAUR,CASP1,CARD16,PARP14,IL1B,NOD2,MARCO,CLU,TLR5,NECTIN2,TNFSF10,CASP4,FCER1G,PIK3AP1,FAS,GADD45G,GAS6,HPSE,HLA-E,APOL3,CCR2,RSAD2,BTN3A1,PLSCR1,BAK1,IFI35,FFAR2,FFAR3,TGM2,NMI,OSM,CLEC4D,HLA-C,RBCK1,NLRC4,IFIH1,ACTA2,G0S2,BTN3A2,ZNFX1,ZBP1,…	T0_V_T4_down
query_1	8.95229e-08	41	117	8	0.0683761	0.195122	GO:0050691	GO:BP	regulation of defense response to virus by host	AIM2,STAT1,IL27,TRIM22,PML,PARP9,IL1B,DTX3L	T0_V_T4_down
query_1	9.43668e-08	613	276	40	0.144928	0.0652529	GO:0071345	GO:BP	cellular response to cytokine stimulus	GBP5,GBP6,GBP1,GBP2,AIM2,GBP4,IRF1,CEACAM1,ICAM1,STAT1,GBP3,PML,PARP9,IL15RA,RAB20,CASP1,CARD16,PARP14,IL1B,SOCS1,IFITM3,SOCS3,CASP4,FCER1G,FAS,PADI2,GAS6,CCR2,VAMP3,CCRL2,STAT2,GBA1,OSM,MAPK14,SBNO2,IFIH1,ZBP1,IL12RB1,IFI16,JAK3	T0_V_T4_down
query_1	9.68033e-08	4	119	4	0.0336134	1	GO:0071748	GO:CC	monomeric IgA immunoglobulin complex	JCHAIN,IGHA1,IGHA2,IGKV3-20	T0_V_T2_down
query_1	9.7051e-08	22	30	5	0.166667	0.227273	GO:0042832	GO:BP	defense response to protozoan	BATF2,GBP6,GBP1,GBP2,GBP4	T0_V_T4_down
query_1	1.20763e-07	419	269	29	0.107807	0.0692124	GO:0002764	GO:BP	immune response-regulating signaling pathway	FCGR1A,GBP5,GBP1,LIMK1,GBP2,AIM2,DUSP3,IRF1,CEACAM1,TIFA,CASP1,NOD2,TLR5,NECTIN2,FCER1G,PIK3AP1,RSAD2,BTN3A1,PLSCR1,IFI35,FFAR2,NMI,CLEC4D,RBCK1,NLRC4,IFIH1,BTN3A2,CD300A,BTN3A3	T0_V_T4_down
query_1	1.22688e-07	293	271	25	0.0922509	0.0853242	GO:0002833	GO:BP	positive regulation of response to biotic stimulus	CD274,GBP5,GBP2,AIM2,IRF1,TIFA,PARP9,CASP1,NOD2,TLR5,NECTIN2,PIK3AP1,HLA-E,RSAD2,PLSCR1,IFI35,FFAR2,NMI,NLRC4,IFIH1,ZNFX1,ZBP1,MR1,CD300A,IFI16	T0_V_T4_down
query_1	1.25511e-07	5	70	4	0.0571429	0.8	GO:0140639	GO:BP	positive regulation of pyroptosis	GBP5,GBP1,GBP2,GBP3	T0_V_T4_down
query_1	1.26609e-07	141	232	17	0.0732759	0.120567	KEGG:04621	KEGG	NOD-like receptor signaling pathway	GBP5,GBP1,GBP2,AIM2,GBP4,STAT1,CASP5,GBP3,CASP1,CARD16,IL1B,NOD2,CASP4,STAT2,MAPK14,RBCK1,NLRC4	T0_V_T4_down
query_1	1.29138e-07	1044	277	53	0.191336	0.0507663	GO:0080134	GO:BP	regulation of response to stress	SERPING1,AIM2,SCARF1,FCGR1A,TIFA,GBP5,RMI2,SOCS3,SMARCD3,KREMEN1,IL27,CEACAM1,SLAMF8,TLR5,TNFAIP6,RHBDF2,TRIM22,OSM,IL1B,GCH1,HPSE,IRF1,VSIG4,PLSCR1,GBP2,GBA1,CARD16,TRIM21,SBNO2,CASP1,PML,STAT1,NLRC4,NECTIN2,CCR2,OAS1,PIK3AP1,PLAUR,MAPK14,NAIP,NOD2,HLA-E,CASP4,OAS3,BAK1,RSAD2,DDIAS,PARP9,S100A9,FPR2,BCL6,DDX60,ZFP36	T0_V_T2_down
query_1	1.30242e-07	185	284	21	0.0739437	0.113514	GO:0031348	GO:BP	negative regulation of defense response	SERPING1,CEACAM1,TRIM21,RHBDF2,NOD2,SOCS3,SLAMF8,TNFAIP6,TRAFD1,PARP14,GBA1,NMI,ELF4,STAT3,STAT2,MAPK14,HLA-E,PRKCD,GRN,TRIM38,IFI16	T0_V_T3_down
query_1	1.48537e-07	20	264	8	0.030303	0.4	WP:WP4197	WP	Immune response to tuberculosis	IRF1,TAP1,STAT1,IFIT3,PSMB8,IFI35,SOCS1,STAT2	T0_V_T3_down
query_1	1.55844e-07	23	30	5	0.166667	0.217391	GO:0001562	GO:BP	response to protozoan	BATF2,GBP6,GBP1,GBP2,GBP4	T0_V_T4_down
query_1	1.60619e-07	150	276	18	0.0652174	0.12	GO:0050777	GO:BP	negative regulation of immune response	SERPING1,CEACAM1,RHBDF2,SLAMF8,TRIM21,PARP14,TRAFD1,NOD2,HLA-E,CCR2,STAT2,NMI,MAPK14,BCL6,FGL2,CD300A,IFI16,JAK3	T0_V_T4_down
query_1	1.8324e-07	860	292	48	0.164384	0.055814	GO:0001775	GO:BP	cell activation	CD274,BATF2,PDCD1LG2,CEACAM1,ICAM1,DUSP3,IRF1,SMARCD3,IL27,CD177,IL15RA,NOD2,SOCS3,IL1B,SLAMF8,NECTIN2,MYL9,FANCA,FCER1G,ANXA3,CLU,DYSF,GAS6,TREML1,BCL6,GBA1,PLSCR1,ACTA2,NBN,NMI,IFI35,ELF4,PLEK,LTBR,BCL3,SOCS1,BTN3A1,BAK1,STAT3,CD300A,MAPK14,HLA-E,SEMA4A,PRKCD,RSAD2,GRN,JAK3,CLEC4D	T0_V_T3_down
query_1	1.8515e-07	419	273	29	0.106227	0.0692124	GO:0002764	GO:BP	immune response-regulating signaling pathway	FCGR1A,GBP5,AIM2,GBP1,GBP2,CEACAM1,LIMK1,DUSP3,IRF1,TIFA,NOD2,NECTIN2,TLR5,FCER1G,CASP1,PIK3AP1,FFAR2,NLRC4,PLSCR1,LY96,RBCK1,NMI,IFI35,IGHA1,BTN3A1,ALPK1,CD300A,PRKCD,RSAD2	T0_V_T3_down
query_1	2.04012e-07	325	291	27	0.0927835	0.0830769	GO:0009615	GO:BP	response to virus	AIM2,GBP5,GBP1,IL27,GBP3,RTP4,TRIM22,IL1B,IRF1,PLSCR1,GBP2,IFIT3,TRIM21,CASP1,PML,STAT1,IFITM3,OAS1,MAPK14,MOV10,OAS3,IFI44L,RSAD2,PARP9,IFI27,DDX60,IFI16	T0_V_T2_down
query_1	2.18961e-07	396	273	28	0.102564	0.0707071	GO:0002757	GO:BP	immune response-activating signaling pathway	GBP5,AIM2,GBP1,GBP2,CEACAM1,LIMK1,DUSP3,IRF1,TIFA,NOD2,NECTIN2,TLR5,FCER1G,CASP1,PIK3AP1,FFAR2,NLRC4,PLSCR1,LY96,RBCK1,NMI,IFI35,IGHA1,BTN3A1,ALPK1,CD300A,PRKCD,RSAD2	T0_V_T3_down
query_1	2.52997e-07	31	117	7	0.0598291	0.225806	GO:0002230	GO:BP	positive regulation of defense response to virus by host	AIM2,STAT1,IL27,TRIM22,PML,PARP9,DTX3L	T0_V_T4_down
query_1	2.87426e-07	460	271	32	0.118081	0.0695652	GO:0032103	GO:BP	positive regulation of response to external stimulus	FCGR1A,GBP5,SCARF1,GBP2,AIM2,IRF1,TIFA,PARP9,CASP1,IL1B,NOD2,TLR5,NECTIN2,CASP4,PIK3AP1,GAS6,HLA-E,CCR2,RSAD2,PLSCR1,IFI35,FFAR2,FFAR3,NMI,OSM,NLRC4,IFIH1,ZNFX1,ZBP1,S100A9,CD300A,IFI16	T0_V_T4_down
query_1	3.37825e-07	4	70	4	0.0571429	1	GO:0051715	GO:BP	cytolysis in another organism	GBP5,GBP1,GBP2,GBP3	T0_V_T4_down
query_1	3.42538e-07	22	38	5	0.131579	0.227273	GO:0042832	GO:BP	defense response to protozoan	BATF2,GBP6,GBP1,GBP2,GBP4	T0_V_T3_down
query_1	3.45046e-07	4	119	4	0.0336134	1	GO:0071749	GO:CC	polymeric IgA immunoglobulin complex	JCHAIN,IGHA1,IGHA2,IGKV3-20	T0_V_T2_down
query_1	3.45046e-07	4	119	4	0.0336134	1	GO:0071751	GO:CC	secretory IgA immunoglobulin complex	JCHAIN,IGHA1,IGHA2,IGKV3-20	T0_V_T2_down
query_1	3.45046e-07	4	119	4	0.0336134	1	GO:0071746	GO:CC	IgA immunoglobulin complex, circulating	JCHAIN,IGHA1,IGHA2,IGKV3-20	T0_V_T2_down
query_1	3.45046e-07	7	199	5	0.0251256	0.714286	GO:0071735	GO:CC	IgG immunoglobulin complex	IGHA1,IGHG2,IGLC2,IGHG1,IGLC3	T0_V_T2_down
query_1	3.9385e-07	41	142	8	0.056338	0.195122	GO:0050691	GO:BP	regulation of defense response to virus by host	AIM2,IL27,STAT1,PML,PARP9,IL1B,TRIM22,DTX3L	T0_V_T3_down
query_1	4.06509e-07	279	284	24	0.084507	0.0860215	GO:0045089	GO:BP	positive regulation of innate immune response	GBP5,AIM2,GBP2,IRF1,TIFA,NOD2,PARP9,NECTIN2,TLR5,CASP1,PIK3AP1,FFAR2,NLRC4,PLSCR1,LY96,NMI,IFI35,ZNFX1,ZBP1,ALPK1,CD300A,HLA-E,RSAD2,IFI16	T0_V_T3_down
query_1	4.39951e-07	5	95	4	0.0421053	0.8	GO:0140639	GO:BP	positive regulation of pyroptosis	GBP5,GBP1,GBP2,GBP3	T0_V_T3_down
query_1	4.51189e-07	106	264	15	0.0568182	0.141509	GO:0050729	GO:BP	positive regulation of inflammatory response	FCGR1A,AIM2,CASP1,IL1B,CASP4,HLA-E,CCR2,IFI35,FFAR2,FFAR3,NMI,OSM,NLRC4,ZBP1,S100A9	T0_V_T4_down
query_1	4.58361e-07	31	233	9	0.0386266	0.290323	WP:WP619	WP	Type II interferon signaling	GBP1,SOCS3,TAP1,ICAM1,IL1B,IRF1,STAT1,OAS1,SOCS1	T0_V_T2_down
query_1	4.63884e-07	756	292	43	0.14726	0.0568783	GO:0045321	GO:BP	leukocyte activation	CD274,BATF2,PDCD1LG2,CEACAM1,ICAM1,DUSP3,IRF1,SMARCD3,IL27,CD177,IL15RA,NOD2,SOCS3,IL1B,SLAMF8,NECTIN2,FANCA,FCER1G,ANXA3,CLU,DYSF,GAS6,BCL6,GBA1,PLSCR1,NBN,NMI,IFI35,ELF4,LTBR,BCL3,SOCS1,BTN3A1,BAK1,STAT3,CD300A,HLA-E,SEMA4A,PRKCD,RSAD2,GRN,JAK3,CLEC4D	T0_V_T3_down
query_1	4.7704e-07	460	291	33	0.113402	0.0717391	GO:0032103	GO:BP	positive regulation of response to external stimulus	FCGR1A,GBP5,AIM2,GBP2,SCARF1,IRF1,TIFA,NOD2,PARP9,IL1B,NECTIN2,TLR5,CASP4,CASP1,PIK3AP1,FFAR2,GAS6,OSM,NLRC4,PLSCR1,LY96,NMI,IFI35,ZNFX1,ZBP1,S100A9,ALPK1,CD300A,HLA-E,RSAD2,GRN,IFI16,S100A8	T0_V_T3_down
query_1	4.7704e-07	374	285	29	0.101754	0.0775401	GO:0002683	GO:BP	negative regulation of immune system process	CD274,SERPING1,PDCD1LG2,C1QC,GBP1,CEACAM1,DUSP3,IRF1,TRIM21,RHBDF2,NOD2,SLAMF8,TNFAIP6,TRAFD1,PADI2,PARP14,BCL6,NMI,TMEM176A,TMEM176B,SOCS1,CD300A,STAT2,MAPK14,HLA-E,LILRB3,GRN,IFI16,JAK3	T0_V_T3_down
query_1	4.93843e-07	606	291	38	0.130584	0.0627063	GO:0001817	GO:BP	regulation of cytokine production	CD274,PDCD1LG2,AIM2,GBP5,GBP1,IL27,CEACAM1,TLR5,IGF2BP3,OSM,IL1B,HPSE,IRF1,VSIG4,GAS6,GBA1,CARD16,FCER1G,HLA-DPA1,TRIM21,CASP1,PML,STAT1,NLRC4,CCR2,OAS1,MAPK14,NAIP,NOD2,HLA-E,OAS3,SOCS1,RSAD2,BCL6,ZFP36,LILRB4,XAF1,IFI16	T0_V_T2_down
query_1	5.1576e-07	23	38	5	0.131579	0.217391	GO:0001562	GO:BP	response to protozoan	BATF2,GBP6,GBP1,GBP2,GBP4	T0_V_T3_down
query_1	5.3196e-07	396	269	27	0.100372	0.0681818	GO:0002757	GO:BP	immune response-activating signaling pathway	GBP5,GBP1,LIMK1,GBP2,AIM2,DUSP3,IRF1,CEACAM1,TIFA,CASP1,NOD2,TLR5,NECTIN2,FCER1G,PIK3AP1,RSAD2,BTN3A1,PLSCR1,IFI35,FFAR2,NMI,RBCK1,NLRC4,IFIH1,BTN3A2,CD300A,BTN3A3	T0_V_T4_down
query_1	5.61262e-07	1880	162	54	0.333333	0.0287234	GO:0097708	GO:CC	intracellular vesicle	FCGR1A,CD274,GBP5,SERPING1,SEPTIN4,GBP6,GBP1,SCARF1,GBP2,LHFPL2,GBP4,CEACAM1,TAP1,VPS9D1,SORT1,VAMP5,TRIM21,CD177,STX11,GBP3,PML,TNFAIP6,IL15RA,PLAUR,GPR84,RAB20,LTA4H,CTSA,SAMD9L,IL1B,NOD2,SOCS1,MARCO,DTX3L,CLU,MYOF,IFITM3,AP5B1,NPC2,SELL,GNS,FCER1G,PADI2,CALCOCO2,ANXA3,LGALS3BP,GAS6,ITGA2B,DYSF,CYB561,GCH1,HPSE,HLA-E,GYG1	T0_V_T4_down
query_1	5.61262e-07	1876	162	54	0.333333	0.0287846	GO:0031410	GO:CC	cytoplasmic vesicle	FCGR1A,CD274,GBP5,SERPING1,SEPTIN4,GBP6,GBP1,SCARF1,GBP2,LHFPL2,GBP4,CEACAM1,TAP1,VPS9D1,SORT1,VAMP5,TRIM21,CD177,STX11,GBP3,PML,TNFAIP6,IL15RA,PLAUR,GPR84,RAB20,LTA4H,CTSA,SAMD9L,IL1B,NOD2,SOCS1,MARCO,DTX3L,CLU,MYOF,IFITM3,AP5B1,NPC2,SELL,GNS,FCER1G,PADI2,CALCOCO2,ANXA3,LGALS3BP,GAS6,ITGA2B,DYSF,CYB561,GCH1,HPSE,HLA-E,GYG1	T0_V_T4_down
query_1	5.82836e-07	36	259	11	0.042471	0.305556	GO:0019731	GO:BP	antibacterial humoral response	JCHAIN,IGHA1,IGHA2,H2BC12,IGHG2,IGKV3-20,IGHG1,H2BC6,NOD2,HLA-E,H2BC21	T0_V_T2_down
query_1	5.82836e-07	608	291	38	0.130584	0.0625	GO:0001816	GO:BP	cytokine production	CD274,PDCD1LG2,AIM2,GBP5,GBP1,IL27,CEACAM1,TLR5,IGF2BP3,OSM,IL1B,HPSE,IRF1,VSIG4,GAS6,GBA1,CARD16,FCER1G,HLA-DPA1,TRIM21,CASP1,PML,STAT1,NLRC4,CCR2,OAS1,MAPK14,NAIP,NOD2,HLA-E,OAS3,SOCS1,RSAD2,BCL6,ZFP36,LILRB4,XAF1,IFI16	T0_V_T2_down
query_1	5.95306e-07	282	282	23	0.0815603	0.0815603	GO:0002768	GO:BP	immune response-regulating cell surface receptor signaling pathway	FCGR1A,GBP1,DUSP3,LIMK1,IGHA1,CEACAM1,IGHA2,TLR5,IGHG2,IGHG1,PLSCR1,FCER1G,FCAR,NECTIN2,IGLC3,CLEC4D,OAS1,PIK3AP1,BMX,NOD2,FPR2,CD38,LILRB4	T0_V_T2_down
query_1	6.53498e-07	279	271	23	0.0848708	0.0824373	GO:0045089	GO:BP	positive regulation of innate immune response	GBP5,GBP2,AIM2,IRF1,TIFA,PARP9,CASP1,NOD2,TLR5,NECTIN2,PIK3AP1,HLA-E,RSAD2,PLSCR1,IFI35,FFAR2,NMI,NLRC4,IFIH1,ZNFX1,ZBP1,CD300A,IFI16	T0_V_T4_down
query_1	6.7345e-07	374	291	29	0.0996564	0.0775401	GO:0002683	GO:BP	negative regulation of immune system process	CD274,SERPING1,PDCD1LG2,GBP1,C1QC,DUSP3,IRF1,CEACAM1,RHBDF2,SLAMF8,TRIM21,TNFAIP6,PARP14,TRAFD1,NOD2,SOCS1,PADI2,HLA-E,CCR2,STAT2,NMI,MAPK14,BCL6,FGL2,CD300A,IFI16,TMEM176B,JAK3,LILRB3	T0_V_T4_down
query_1	7.73298e-07	2800	278	105	0.377698	0.0375	GO:0006950	GO:BP	response to stress	C1QC,CD177,SERPING1,AIM2,GBP6,SCARF1,FCGR1A,TIFA,BATF2,GBP5,RMI2,GBP1,JCHAIN,SOCS3,IGHA1,SMARCD3,ADM,KREMEN1,IL27,CEACAM1,SDC1,SLAMF8,ATF3,ANXA3,IGHA2,TAP1,TLR5,GBP3,FBXO6,TNFAIP6,RHBDF2,H2BC12,IGHG2,APOL1,RTP4,TRIM22,OSM,MYOF,IL1B,BHLHA15,LGALS3BP,IGKV3-20,GCH1,IGHG1,HPSE,UBE2L6,IRF1,VSIG4,APOL2,GBP4,GAS6,RAB20,PLSCR1,GBP2,IFIT3,GBA1,CARD16,FCER1G,HLA-DPA1,FCAR,TRIM21,CCRL2,MARCO,SBNO2,CASP1,PML…	T0_V_T2_down
query_1	8.00458e-07	4	222	4	0.018018	1	GO:0072557	GO:CC	IPAF inflammasome complex	CARD16,CASP1,NLRC4,NAIP	T0_V_T2_down
query_1	9.25646e-07	423	291	30	0.103093	0.070922	GO:0043068	GO:BP	positive regulation of programmed cell death	CD274,GBP5,SEPTIN4,GBP1,GBP2,ATF3,ADM,GADD45B,PML,GBP3,CLU,TNFSF10,TGM2,FAS,HCAR2,NLRC4,G0S2,BCL6,RBCK1,LTBR,KCNMA1,ZBP1,SOD2,S100A9,HTATIP2,BAK1,GADD45G,PRKCD,GRN,S100A8	T0_V_T3_down
query_1	9.25646e-07	31	142	7	0.0492958	0.225806	GO:0002230	GO:BP	positive regulation of defense response to virus by host	AIM2,IL27,STAT1,PML,PARP9,TRIM22,DTX3L	T0_V_T3_down
query_1	9.25646e-07	1650	292	75	0.256849	0.0454545	GO:0048584	GO:BP	positive regulation of response to stimulus	CD274,FCGR1A,SERPING1,GBP5,SEPTIN4,C1QC,AIM2,GBP1,GBP2,CEACAM1,SCARF1,ICAM1,LIMK1,DUSP3,IRF1,SMARCD3,SECTM1,TIFA,ATF3,TRIM21,PLAUR,CD177,GADD45B,NOD2,PML,PARP9,IL1B,CARD16,NECTIN2,TRIM22,TLR5,CASP4,FCER1G,CASP1,CLU,TNFSF10,PARP14,HPSE,PIK3AP1,TGM2,FFAR2,FAS,GAS6,MARCO,OSM,NLRC4,G0S2,PLSCR1,ACTA2,LY96,RBCK1,RALB,NMI,IFI35,ZNFX1,IGHA1,LTBR,ZBP1,S100A9,BTN3A1,BAK1,ALPK1,GADD45G,INSL3,STAT3,CD300A,HL…	T0_V_T3_down
query_1	9.33107e-07	287	276	24	0.0869565	0.0836237	GO:0002460	GO:BP	adaptive immune response based on somatic recombination of immune receptors built from immunoglobulin superfamily domains	FCGR1A,CD274,SERPING1,C1QC,CEACAM1,ICAM1,IL27,IL1B,NOD2,CLU,NECTIN2,SOCS3,FCER1G,HLA-E,CCR2,RSAD2,NBN,HLA-C,BCL6,BTN3A2,MR1,IL12RB1,BTN3A3,JAK3	T0_V_T4_down
query_1	9.34006e-07	89	269	14	0.0520446	0.157303	GO:0071346	GO:BP	cellular response to type II interferon	GBP6,GBP5,GBP1,GBP3,IRF1,GBP4,RAB20,GBP2,HLA-DPA1,FCAR,CASP1,STAT1,PARP9,VAMP3	T0_V_T2_down
query_1	1.11582e-06	4	95	4	0.0421053	1	GO:0051715	GO:BP	cytolysis in another organism	GBP5,GBP1,GBP2,GBP3	T0_V_T3_down
query_1	1.14164e-06	264	277	24	0.0866426	0.0909091	GO:0050727	GO:BP	regulation of inflammatory response	AIM2,FCGR1A,SOCS3,SLAMF8,TNFAIP6,RHBDF2,OSM,IL1B,GBA1,CARD16,SBNO2,CASP1,NLRC4,CCR2,PIK3AP1,MAPK14,NAIP,NOD2,HLA-E,CASP4,S100A9,FPR2,BCL6,ZFP36	T0_V_T2_down
query_1	1.1685e-06	694	273	37	0.135531	0.0533141	REAC:R-HSA-1280218	REAC	Adaptive Immune System	FCGR1A,CD274,PDCD1LG2,FBXO6,UBE2L6,TAP1,ICAM1,TRIM21,PSMB9,PSME2,PSMB8,CTSA,SOCS1,DTX3L,NECTIN2,SELL,SOCS3,PIK3AP1,RNF213,TRIM69,PSME1,HLA-E,VAMP3,TREML1,BTN3A1,SLAMF7,CLEC2B,DAPP1,TAPBP,HLA-C,RBCK1,BTN3A2,PSMB10,S100A9,CD300A,BTN3A3,LILRA6	T0_V_T4_down
query_1	1.16972e-06	339	291	26	0.0893471	0.0766962	GO:0045088	GO:BP	regulation of innate immune response	SERPING1,AIM2,TIFA,GBP5,CEACAM1,SLAMF8,TLR5,IRF1,VSIG4,PLSCR1,GBP2,TRIM21,CASP1,NLRC4,NECTIN2,OAS1,PIK3AP1,NAIP,NOD2,HLA-E,OAS3,RSAD2,PARP9,FPR2,DDX60,IFI16	T0_V_T2_down
query_1	1.23336e-06	5	99	4	0.040404	0.8	GO:0140970	GO:BP	AIM2 inflammasome complex assembly	GBP5,GBP2,AIM2,CASP1	T0_V_T4_down
query_1	1.23336e-06	58	117	8	0.0683761	0.137931	GO:0050688	GO:BP	regulation of defense response to virus	AIM2,STAT1,IL27,TRIM22,PML,PARP9,IL1B,DTX3L	T0_V_T4_down
query_1	1.31302e-06	1831	207	64	0.309179	0.0349536	GO:0010033	GO:BP	response to organic substance	CD274,GBP5,PDCD1LG2,GBP6,GBP1,GBP2,AIM2,FBXO6,GBP4,IRF1,CEACAM1,ICAM1,STAT1,POLB,SORT1,ATF3,TRIM21,GBP3,PML,GRIN3A,ADM,PARP9,IL15RA,RAB20,LTA4H,CASP1,CARD16,PARP14,IL1B,NOD2,SOCS1,CLU,IFITM3,TLR5,SELL,SOCS3,TNFSF10,CASP4,FCER1G,FAS,PADI2,GRAMD1B,CALCOCO2,ANXA3,GAS6,GCH1,HPSE,CCR2,SDC1,NUB1,VAMP3,PLSCR1,KCNMA1,BAK1,FFAR2,FFAR3,ADCY3,CCRL2,STAT2,TGM2,SOD2,GBA1,XAF1,OSM	T0_V_T4_down
query_1	1.32774e-06	5	70	4	0.0571429	0.8	GO:0019835	GO:BP	cytolysis	GBP5,GBP1,GBP2,GBP3	T0_V_T4_down
query_1	1.38612e-06	756	282	41	0.14539	0.0542328	GO:0045321	GO:BP	leukocyte activation	CD274,PDCD1LG2,CD177,BATF2,DUSP3,SOCS3,SMARCD3,IL27,CEACAM1,SLAMF8,ANXA3,ICAM1,IL1B,IRF1,VSIG4,GAS6,PLSCR1,GBA1,IL15RA,FCER1G,HLA-DPA1,FCAR,SBNO2,MZB1,NECTIN2,CCR2,CLEC4D,SLAMF7,DYSF,NOD2,HLA-E,NBN,SOCS1,BAK1,RSAD2,HLA-DRA,FPR2,BCL6,LTBR,CD38,LILRB4	T0_V_T2_down
query_1	1.49731e-06	93	258	13	0.0503876	0.139785	GO:0019882	GO:BP	antigen processing and presentation	FCGR1A,TAP1,ICAM1,PSMB8,NOD2,FCER1G,PSME1,HLA-E,GBA1,TAPBP,HLA-C,FGL2,MR1	T0_V_T4_down
query_1	1.54294e-06	150	285	17	0.0596491	0.113333	GO:0050777	GO:BP	negative regulation of immune response	SERPING1,CEACAM1,TRIM21,RHBDF2,NOD2,SLAMF8,TRAFD1,PARP14,BCL6,NMI,CD300A,STAT2,MAPK14,HLA-E,GRN,IFI16,JAK3	T0_V_T3_down
query_1	1.56563e-06	106	291	15	0.0515464	0.141509	GO:0050729	GO:BP	positive regulation of inflammatory response	FCGR1A,AIM2,IL1B,CASP4,CASP1,FFAR2,OSM,NLRC4,NMI,IFI35,ZBP1,S100A9,HLA-E,GRN,S100A8	T0_V_T3_down
query_1	1.69326e-06	262	269	24	0.0892193	0.0916031	GO:0009897	GO:CC	external side of plasma membrane	FCGR1A,CD274,PDCD1LG2,ICAM1,PLAUR,TCN2,SELL,FCER1G,FAS,ITGA2B,HLA-E,CCR2,SDC1,BTN3A1,SLAMF7,ITGA7,CLEC2B,CCRL2,CLEC4D,HLA-C,BTN3A2,MR1,IL12RB1,BTN3A3	T0_V_T4_down
query_1	1.79428e-06	34	125	8	0.064	0.235294	GO:0006956	GO:BP	complement activation	C1QC,SERPING1,IGHA1,IGHA2,IGHG2,IL1B,IGHG1,VSIG4	T0_V_T2_down
query_1	1.80713e-06	423	268	28	0.104478	0.0661939	GO:0043068	GO:BP	positive regulation of programmed cell death	CD274,GBP5,SEPTIN4,GBP1,GBP2,ATF3,GBP3,PML,GADD45B,ADM,CLU,TNFSF10,FAS,GADD45G,KCNMA1,BAK1,TGM2,SOD2,RBCK1,NLRC4,HTATIP2,BCL6,G0S2,ZBP1,HCAR2,LTBR,S100A9,E2F1	T0_V_T4_down
query_1	1.95199e-06	5	143	4	0.027972	0.8	GO:0140639	GO:BP	positive regulation of pyroptosis	GBP5,GBP1,GBP3,GBP2	T0_V_T2_down
query_1	1.97284e-06	3	74	3	0.0405405	1	GO:0071750	GO:CC	dimeric IgA immunoglobulin complex	JCHAIN,IGHA1,IGHA2	T0_V_T2_down
query_1	1.97284e-06	3	74	3	0.0405405	1	GO:0071752	GO:CC	secretory dimeric IgA immunoglobulin complex	JCHAIN,IGHA1,IGHA2	T0_V_T2_down
query_1	2.41541e-06	5	117	4	0.034188	0.8	GO:0140970	GO:BP	AIM2 inflammasome complex assembly	GBP5,AIM2,GBP2,CASP1	T0_V_T3_down
query_1	2.41541e-06	613	133	24	0.180451	0.0391517	GO:0071345	GO:BP	cellular response to cytokine stimulus	GBP5,GBP6,AIM2,GBP1,GBP2,CEACAM1,ICAM1,IRF1,GBP4,STAT1,IL15RA,RAB20,PML,PARP9,SOCS3,IL1B,CARD16,GBP3,IFITM3,CASP4,FCER1G,CASP1,PADI2,PARP14	T0_V_T3_down
query_1	3.17008e-06	291	214	21	0.0981308	0.0721649	GO:0032102	GO:BP	negative regulation of response to external stimulus	SERPING1,KREMEN1,DUSP3,CEACAM1,RHBDF2,SLAMF8,TRIM21,TNFAIP6,GRIN3A,PLAUR,CARD16,PARP14,TRAFD1,NOD2,SOCS3,PADI2,HLA-E,STAT2,NMI,GBA1,MAPK14	T0_V_T4_down
query_1	3.49195e-06	366	272	26	0.0955882	0.0710383	GO:0031349	GO:BP	positive regulation of defense response	AIM2,FCGR1A,TIFA,GBP5,TLR5,OSM,IL1B,IRF1,PLSCR1,GBP2,CASP1,NLRC4,NECTIN2,CCR2,OAS1,PIK3AP1,NAIP,NOD2,HLA-E,CASP4,OAS3,RSAD2,PARP9,S100A9,FPR2,DDX60	T0_V_T2_down
query_1	3.52553e-06	92	284	13	0.0457746	0.141304	GO:0002832	GO:BP	negative regulation of response to biotic stimulus	SERPING1,CEACAM1,TRIM21,SLAMF8,CARD16,TRAFD1,PARP14,NMI,STAT2,HLA-E,GRN,TRIM38,IFI16	T0_V_T3_down
query_1	3.79963e-06	227	284	20	0.0704225	0.0881057	GO:0002218	GO:BP	activation of innate immune response	GBP5,AIM2,GBP2,IRF1,TIFA,NOD2,TLR5,CASP1,PIK3AP1,FFAR2,NLRC4,LY96,NMI,IFI35,ZNFX1,ZBP1,ALPK1,CD300A,RSAD2,IFI16	T0_V_T3_down
query_1	3.88683e-06	64	265	10	0.0377358	0.15625	GO:0070821	GO:CC	tertiary granule membrane	CD177,GPR84,CEACAM1,MCEMP1,SIGLEC14,FCER1G,FCAR,CLEC4D,SLC2A3,FPR2	T0_V_T2_down
query_1	4.01838e-06	13	201	6	0.0298507	0.461538	GO:0034987	GO:MF	immunoglobulin receptor binding	JCHAIN,IGHA1,IGHA2,IGHG2,IGHG1,CLEC4D	T0_V_T2_down
query_1	4.07041e-06	59	262	11	0.0419847	0.186441	WP:WP5218	WP	Extrafollicular and follicular B cell activation by SARS CoV 2	MS4A1,PAX5,IFNG-AS1,CR2,CD19,GPR183,BACH2,BLNK,MFGE8,CD22,CXCR5	T0_V_T4_up
query_1	4.56032e-06	5	95	4	0.0421053	0.8	GO:0019835	GO:BP	cytolysis	GBP5,GBP1,GBP2,GBP3	T0_V_T3_down
query_1	4.99205e-06	58	93	7	0.0752688	0.12069	GO:0050688	GO:BP	regulation of defense response to virus	AIM2,IL27,STAT1,PML,PARP9,IL1B,TRIM22	T0_V_T3_down
query_1	5.24834e-06	181	272	17	0.0625	0.0939227	REAC:R-HSA-5357801	REAC	Programmed Cell Death	IRF1,CASP5,IL1B,PSMB9,LMNB1,PSME2,CASP4,CASP1,TNFSF10,PSMB8,FAS,LY96,PSME1,IRF2,BAK1,STAT3,PRKCD	T0_V_T3_down
query_1	5.58948e-06	4	143	4	0.027972	1	GO:0051715	GO:BP	cytolysis in another organism	GBP5,GBP1,GBP3,GBP2	T0_V_T2_down
query_1	5.5919e-06	149	30	7	0.233333	0.0469799	GO:0001906	GO:BP	cell killing	FCGR1A,GBP5,GBP1,APOL1,GBP2,CEACAM1,ICAM1	T0_V_T3_down
query_1	5.77963e-06	106	269	13	0.0483271	0.122642	GO:0002456	GO:BP	T cell mediated immunity	CEACAM1,ICAM1,IL1B,NOD2,NECTIN2,HLA-E,CCR2,RSAD2,HLA-C,BTN3A2,MR1,IL12RB1,BTN3A3	T0_V_T4_down
query_1	5.95407e-06	380	271	26	0.095941	0.0684211	GO:0001819	GO:BP	positive regulation of cytokine production	CD274,GBP5,AIM2,IRF1,STAT1,IL27,CASP1,IL1B,NOD2,CLU,TLR5,FCER1G,HPSE,HLA-E,CCR2,RSAD2,BTN3A1,FFAR2,FFAR3,OSM,MAPK14,NLRC4,IFIH1,BTN3A2,IL12RB1,IFI16	T0_V_T4_down
query_1	6.40008e-06	25	291	8	0.0274914	0.32	GO:0035456	GO:BP	response to interferon-beta	AIM2,IRF1,PLSCR1,STAT1,IFITM3,OAS1,XAF1,IFI16	T0_V_T2_down
query_1	6.45112e-06	363	276	26	0.0942029	0.0716253	REAC:R-HSA-449147	REAC	Signaling by Interleukins	DUSP3,ICAM1,TIFA,STAT1,IL27,PSMB9,PSME2,IL15RA,PSMB8,CASP1,LMNB1,IL1B,NOD2,SOCS1,SOCS3,PSME1,CCR2,SDC1,STAT2,SOD2,OSM,MAPK14,BCL6,PSMB10,IL12RB1,JAK3	T0_V_T4_down
query_1	6.60394e-06	489	276	33	0.119565	0.0674847	GO:0098552	GO:CC	side of membrane	FCGR1A,CD274,GBP5,PDCD1LG2,NRN1,ICAM1,CD177,PLAUR,CTSA,TCN2,SELL,SOCS3,FCER1G,FAS,ITGA2B,HLA-E,CCR2,SDC1,BTN3A1,SLAMF7,ITGA7,CLEC2B,CCRL2,TAPBP,CLEC4D,HLA-C,GM2A,MICALL1,BTN3A2,MR1,IL12RB1,BTN3A3,JAK3	T0_V_T4_down
query_1	6.60394e-06	567	212	32	0.150943	0.0564374	GO:0009986	GO:CC	cell surface	FCGR1A,CD274,PDCD1LG2,SDC3,CEACAM1,ICAM1,IL27,SORT1,SLAMF8,VAMP5,IL15RA,PLAUR,NOD2,CLU,TCN2,NECTIN2,SELL,FCER1G,FAS,ITGA2B,HLA-E,CCR2,SDC1,VAMP3,TREML1,BTN3A1,SLAMF7,ITGA7,CLEC2B,CCRL2,CLEC4D,HLA-C	T0_V_T4_down
query_1	6.60394e-06	16	232	6	0.0258621	0.375	GO:0061702	GO:CC	canonical inflammasome complex	AIM2,CASP5,CASP1,CARD16,CASP4,NLRC4	T0_V_T4_down
query_1	6.6131e-06	287	285	23	0.0807018	0.0801394	GO:0002460	GO:BP	adaptive immune response based on somatic recombination of immune receptors built from immunoglobulin superfamily domains	CD274,FCGR1A,SERPING1,C1QC,CEACAM1,ICAM1,IL27,NOD2,SOCS3,IL1B,NECTIN2,FCER1G,CLU,BCL6,NBN,IGHA1,BCL3,STAT3,HLA-E,SEMA4A,PRKCD,RSAD2,JAK3	T0_V_T3_down
query_1	7.72554e-06	449	276	28	0.101449	0.0623608	GO:0042110	GO:BP	T cell activation	CD274,PDCD1LG2,DUSP3,IRF1,CEACAM1,ICAM1,SMARCD3,IL27,FANCA,IL1B,NOD2,SOCS1,SOCS3,FCER1G,HLA-E,CCR2,RSAD2,BTN3A1,SLAMF7,GBA1,CLEC4D,BCL6,FGL2,MR1,PSMB10,CD300A,IL12RB1,JAK3	T0_V_T4_down
query_1	7.80509e-06	70	284	11	0.0387324	0.157143	GO:0045824	GO:BP	negative regulation of innate immune response	SERPING1,CEACAM1,TRIM21,SLAMF8,TRAFD1,PARP14,NMI,STAT2,HLA-E,GRN,IFI16	T0_V_T3_down
query_1	7.84034e-06	227	271	19	0.0701107	0.0837004	GO:0002218	GO:BP	activation of innate immune response	GBP5,GBP2,AIM2,IRF1,TIFA,CASP1,NOD2,TLR5,PIK3AP1,RSAD2,IFI35,FFAR2,NMI,NLRC4,IFIH1,ZNFX1,ZBP1,CD300A,IFI16	T0_V_T4_down
query_1	7.98654e-06	497	291	31	0.106529	0.0623742	GO:0002521	GO:BP	leukocyte differentiation	BATF2,C1QC,IRF1,CEACAM1,SMARCD3,IL27,SLAMF8,TNFAIP6,IL15RA,FANCA,IL1B,SOCS1,SOCS3,FCER1G,GAS6,CCR2,RSAD2,BAK1,GBA1,CLEC4D,MAPK14,SBNO2,BCL6,FGL2,LTBR,MR1,IL12RB1,IFI16,TMEM176B,JAK3,LILRB3	T0_V_T4_down
query_1	8.20785e-06	860	282	43	0.152482	0.05	GO:0001775	GO:BP	cell activation	CD274,PDCD1LG2,CD177,BATF2,DUSP3,SOCS3,SMARCD3,IL27,CEACAM1,SLAMF8,ANXA3,ICAM1,IL1B,IRF1,VSIG4,GAS6,PLSCR1,GBA1,IL15RA,FCER1G,HLA-DPA1,FCAR,SBNO2,MZB1,NECTIN2,CCR2,CLEC4D,SLAMF7,DYSF,MAPK14,NOD2,HLA-E,NBN,SOCS1,BAK1,RSAD2,PLEK,HLA-DRA,FPR2,BCL6,LTBR,CD38,LILRB4	T0_V_T2_down
query_1	8.2177e-06	91	264	12	0.0454545	0.131868	REAC:R-HSA-1236975	REAC	Antigen processing-Cross presentation	FCGR1A,TAP1,PSMB9,PSME2,PSMB8,PSME1,HLA-E,VAMP3,TAPBP,HLA-C,PSMB10,S100A9	T0_V_T4_down
query_1	8.6621e-06	2899	171	71	0.415205	0.0244912	GO:0031982	GO:CC	vesicle	FCGR1A,CD274,GBP5,SERPING1,SEPTIN4,GBP6,GBP1,SCARF1,GBP2,FAM20A,LHFPL2,GBP4,CEACAM1,TAP1,ICAM1,VPS9D1,SECTM1,WARS1,SORT1,VAMP5,LAP3,TRIM21,CD177,STX11,GBP3,PSMB9,PML,PSME2,TNFAIP6,IL15RA,PLAUR,GPR84,PSMB8,RAB20,LTA4H,CTSA,SAMD9L,IL1B,NOD2,SOCS1,MARCO,DTX3L,CLU,MYOF,IFITM3,AP5B1,NPC2,NECTIN2,SELL,TNFSF10,GNS,NUCB1,FCER1G,FAS,GK,PADI2,PSME1,CALCOCO2,ANXA3,LGALS3BP,GAS6,ITGA2B,DYSF,CYB561,GCH1,HPSE,…	T0_V_T4_down
query_1	9.05386e-06	16	189	6	0.031746	0.375	GO:0061702	GO:CC	canonical inflammasome complex	AIM2,CASP5,CARD16,CASP4,CASP1,NLRC4	T0_V_T3_down
query_1	9.06387e-06	348	276	25	0.0905797	0.0718391	GO:0002443	GO:BP	leukocyte mediated immunity	FCGR1A,SERPING1,C1QC,CEACAM1,ICAM1,CD177,IL1B,NOD2,CLU,NECTIN2,FCER1G,ANXA3,HLA-E,CCR2,RSAD2,NBN,SLAMF7,HLA-C,BCL6,BTN3A2,MR1,CD300A,IL12RB1,BTN3A3,JAK3	T0_V_T4_down
query_1	9.46844e-06	2842	276	102	0.369565	0.0358902	GO:0048583	GO:BP	regulation of response to stimulus	FCGR1A,CD274,GBP5,SERPING1,SEPTIN4,GBP1,C1QC,LIMK1,SCARF1,GBP2,AIM2,KREMEN1,DUSP3,IRF1,RMI2,CEACAM1,ICAM1,TIFA,SMARCD3,STAT1,SECTM1,IL27,RHBDF2,ATF3,SLAMF8,TRIM21,TRIM22,CD177,PML,TNFAIP6,GRIN3A,GADD45B,ADM,PARP9,PLAUR,CASP1,CARD16,PARP14,FANCA,TRAFD1,IL1B,NOD2,SOCS1,MARCO,DTX3L,CLU,TLR5,NECTIN2,SOCS3,TNFSF10,CASP4,FCER1G,PIK3AP1,FAS,GADD45G,RNF213,PADI2,GAS6,GCH1,HPSE,HLA-E,APOL3,CCR2,RSAD2,BTN3…	T0_V_T4_down
query_1	9.75909e-06	514	292	33	0.113014	0.0642023	GO:0002252	GO:BP	immune effector process	FCGR1A,SERPING1,C1QC,CEACAM1,ICAM1,LIMK1,IL27,CD177,NOD2,SOCS3,IL1B,SLAMF8,NECTIN2,FCER1G,ANXA3,CLU,DYSF,FFAR2,BCL6,NBN,NMI,IFI35,IGHA1,BCL3,STAT3,CD300A,HLA-E,SEMA4A,PRKCD,RSAD2,GRN,JAK3,CLEC4D	T0_V_T3_down
query_1	9.79262e-06	24	249	7	0.0281124	0.291667	REAC:R-HSA-5620971	REAC	Pyroptosis	IRF1,CASP5,IL1B,CASP4,CASP1,IRF2,BAK1	T0_V_T3_down
query_1	9.85029e-06	20	292	7	0.0239726	0.35	WP:WP4197	WP	Immune response to tuberculosis	TAP1,IRF1,IFIT3,STAT1,OAS1,SOCS1,PSMB8	T0_V_T2_down
query_1	1.0603e-05	258	282	20	0.070922	0.0775194	GO:0002429	GO:BP	immune response-activating cell surface receptor signaling pathway	GBP1,DUSP3,LIMK1,IGHA1,CEACAM1,IGHA2,TLR5,IGHG2,IGHG1,PLSCR1,FCER1G,NECTIN2,IGLC3,OAS1,PIK3AP1,BMX,NOD2,FPR2,CD38,LILRB4	T0_V_T2_down
query_1	1.16802e-05	5	175	4	0.0228571	0.8	GO:0140970	GO:BP	AIM2 inflammasome complex assembly	AIM2,GBP5,GBP2,CASP1	T0_V_T2_down
query_1	1.25647e-05	169	276	16	0.057971	0.0946746	GO:0002819	GO:BP	regulation of adaptive immune response	FCGR1A,CD274,IRF1,CEACAM1,IL27,IL1B,NOD2,NECTIN2,HLA-E,CCR2,RSAD2,HLA-C,BCL6,MR1,IL12RB1,JAK3	T0_V_T4_down
query_1	1.28727e-05	78	264	11	0.0416667	0.141026	REAC:R-HSA-1236974	REAC	ER-Phagosome pathway	TAP1,PSMB9,PSME2,PSMB8,PSME1,HLA-E,VAMP3,TAPBP,HLA-C,PSMB10,S100A9	T0_V_T4_down
query_1	1.31787e-05	54	249	9	0.0361446	0.166667	REAC:R-HSA-5218859	REAC	Regulated Necrosis	IRF1,CASP5,IL1B,CASP4,CASP1,TNFSF10,FAS,IRF2,BAK1	T0_V_T3_down
query_1	1.31787e-05	694	291	36	0.123711	0.0518732	REAC:R-HSA-1280218	REAC	Adaptive Immune System	CD274,FCGR1A,PDCD1LG2,ICAM1,FBXO6,UBE2L6,TAP1,TRIM21,SOCS3,PSMB9,NECTIN2,SELL,PSME2,CTSA,TRIM69,PIK3AP1,DTX3L,CLEC2B,PSMB8,RNF213,TREML1,VAMP3,LY96,RBCK1,DAPP1,PSME1,S100A9,SOCS1,BTN3A1,CD300A,IGLV6-57,HLA-E,LILRB3,LILRA6,TAPBP,S100A8	T0_V_T3_down
query_1	1.38353e-05	92	271	12	0.0442804	0.130435	GO:0002832	GO:BP	negative regulation of response to biotic stimulus	SERPING1,CEACAM1,SLAMF8,TRIM21,CARD16,PARP14,TRAFD1,HLA-E,STAT2,NMI,FGL2,IFI16	T0_V_T4_down
query_1	1.38692e-05	54	181	8	0.0441989	0.148148	REAC:R-HSA-5218859	REAC	Regulated Necrosis	IRF1,CASP5,CASP1,IL1B,TNFSF10,CASP4,FAS,BAK1	T0_V_T4_down
query_1	1.55249e-05	290	276	22	0.0797101	0.0758621	GO:0002697	GO:BP	regulation of immune effector process	FCGR1A,SERPING1,CEACAM1,ICAM1,IL27,SLAMF8,CD177,IL1B,NOD2,NECTIN2,HLA-E,CCR2,RSAD2,FFAR2,FFAR3,HLA-C,BCL6,FGL2,MR1,CD300A,IL12RB1,JAK3	T0_V_T4_down
query_1	1.59804e-05	282	292	21	0.0719178	0.0744681	GO:0002768	GO:BP	immune response-regulating cell surface receptor signaling pathway	FCGR1A,GBP1,CEACAM1,LIMK1,DUSP3,NOD2,NECTIN2,TLR5,FCER1G,PIK3AP1,FFAR2,PLSCR1,LY96,RBCK1,NMI,IFI35,IGHA1,BTN3A1,CD300A,PRKCD,CLEC4D	T0_V_T3_down
query_1	1.59804e-05	2842	292	106	0.363014	0.0372977	GO:0048583	GO:BP	regulation of response to stimulus	CD274,FCGR1A,SERPING1,GBP5,SEPTIN4,C1QC,AIM2,GBP1,KREMEN1,RMI2,GBP2,CEACAM1,SCARF1,ICAM1,LIMK1,DUSP3,IRF1,SMARCD3,SECTM1,IL27,TIFA,ATF3,TRIM21,ADM,STAT1,PLAUR,RHBDF2,CD177,GADD45B,NOD2,PML,PARP9,GRIN3A,SOCS3,IL1B,SLAMF8,CARD16,NECTIN2,TRIM22,TLR5,FANCA,TNFAIP6,TRAFD1,CASP4,FCER1G,CASP1,CLU,TNFSF10,PADI2,PARP14,HPSE,PIK3AP1,DTX3L,TGM2,FFAR2,FAS,GAS6,RNF213,MARCO,OSM,GCH1,NLRC4,G0S2,BCL6,GBA1,PLSCR…	T0_V_T3_down
query_1	1.65741e-05	282	269	20	0.0743494	0.070922	GO:0002768	GO:BP	immune response-regulating cell surface receptor signaling pathway	FCGR1A,GBP1,LIMK1,DUSP3,CEACAM1,NOD2,TLR5,NECTIN2,FCER1G,PIK3AP1,BTN3A1,PLSCR1,IFI35,FFAR2,NMI,CLEC4D,RBCK1,BTN3A2,CD300A,BTN3A3	T0_V_T4_down
query_1	1.70291e-05	91	291	12	0.0412371	0.131868	REAC:R-HSA-1236975	REAC	Antigen processing-Cross presentation	FCGR1A,TAP1,PSMB9,PSME2,PSMB8,VAMP3,LY96,PSME1,S100A9,HLA-E,TAPBP,S100A8	T0_V_T3_down
query_1	1.70291e-05	420	292	26	0.0890411	0.0619048	REAC:R-HSA-6798695	REAC	Neutrophil degranulation	CEACAM1,PLAUR,CD177,TNFAIP6,GPR84,SELL,FCER1G,CTSA,LTA4H,PADI2,HPSE,GNS,NPC2,HP,GYG1,GM2A,S100A9,DYNLT1,SERPINA1,CD300A,MAPK14,PRKCD,LILRB3,GRN,S100A8,CLEC4D	T0_V_T3_down
query_1	1.87981e-05	271	269	21	0.0780669	0.0774908	GO:0002449	GO:BP	lymphocyte mediated immunity	FCGR1A,SERPING1,C1QC,CEACAM1,ICAM1,IL1B,NOD2,CLU,NECTIN2,FCER1G,HLA-E,CCR2,RSAD2,NBN,SLAMF7,HLA-C,BCL6,BTN3A2,MR1,IL12RB1,BTN3A3	T0_V_T4_down
query_1	1.95095e-05	84	284	12	0.0422535	0.142857	GO:0032652	GO:BP	regulation of interleukin-1 production	GBP5,AIM2,CEACAM1,NOD2,PML,CARD16,CASP1,GAS6,NLRC4,ELF4,STAT3,IFI16	T0_V_T3_down
query_1	1.95095e-05	84	284	12	0.0422535	0.142857	GO:0032612	GO:BP	interleukin-1 production	GBP5,AIM2,CEACAM1,NOD2,PML,CARD16,CASP1,GAS6,NLRC4,ELF4,STAT3,IFI16	T0_V_T3_down
query_1	2.01233e-05	579	291	36	0.123711	0.0621762	GO:0006954	GO:BP	inflammatory response	AIM2,FCGR1A,GBP5,SOCS3,ADM,IL27,SLAMF8,TLR5,TNFAIP6,RHBDF2,OSM,IL1B,IGHG1,APOL2,PLSCR1,GBP2,GBA1,CARD16,CCRL2,SBNO2,CASP1,NLRC4,CCR2,PIK3AP1,MAPK14,NAIP,NOD2,HLA-E,CASP4,S100A9,HP,FPR2,BCL6,ZFP36,LILRB4,IFI16	T0_V_T2_down
query_1	2.1386e-05	393	276	25	0.0905797	0.0636132	GO:1903131	GO:BP	mononuclear cell differentiation	BATF2,IRF1,SMARCD3,IL27,SLAMF8,IL15RA,FANCA,IL1B,SOCS1,SOCS3,FCER1G,GAS6,CCR2,RSAD2,BAK1,GBA1,CLEC4D,BCL6,FGL2,LTBR,MR1,IL12RB1,IFI16,TMEM176B,JAK3	T0_V_T4_down
query_1	2.24198e-05	181	150	12	0.08	0.0662983	REAC:R-HSA-5357801	REAC	Programmed Cell Death	IRF1,CASP5,PSMB9,PSME2,PSMB8,CASP1,LMNB1,IL1B,TNFSF10,CASP4,FAS,PSME1	T0_V_T4_down
query_1	2.24198e-05	24	181	6	0.0331492	0.25	REAC:R-HSA-5620971	REAC	Pyroptosis	IRF1,CASP5,CASP1,IL1B,CASP4,BAK1	T0_V_T4_down
query_1	2.30339e-05	5	143	4	0.027972	0.8	GO:0019835	GO:BP	cytolysis	GBP5,GBP1,GBP3,GBP2	T0_V_T2_down
query_1	2.312e-05	258	272	19	0.0698529	0.0736434	GO:0002429	GO:BP	immune response-activating cell surface receptor signaling pathway	GBP1,CEACAM1,LIMK1,DUSP3,NOD2,NECTIN2,TLR5,FCER1G,PIK3AP1,FFAR2,PLSCR1,LY96,RBCK1,NMI,IFI35,IGHA1,BTN3A1,CD300A,PRKCD	T0_V_T3_down
query_1	2.33562e-05	196	273	17	0.0622711	0.0867347	GO:0002221	GO:BP	pattern recognition receptor signaling pathway	GBP5,AIM2,GBP2,IRF1,TIFA,NOD2,TLR5,CASP1,PIK3AP1,FFAR2,NLRC4,LY96,NMI,IFI35,ALPK1,CD300A,RSAD2	T0_V_T3_down
query_1	2.37715e-05	154	276	15	0.0543478	0.0974026	GO:0002822	GO:BP	regulation of adaptive immune response based on somatic recombination of immune receptors built from immunoglobulin superfamily domains	FCGR1A,CD274,CEACAM1,IL27,IL1B,NOD2,NECTIN2,HLA-E,CCR2,RSAD2,HLA-C,BCL6,MR1,IL12RB1,JAK3	T0_V_T4_down
query_1	2.49639e-05	363	285	25	0.0877193	0.0688705	REAC:R-HSA-449147	REAC	Signaling by Interleukins	ICAM1,DUSP3,IL27,TIFA,STAT1,IL15RA,NOD2,SOCS3,IL1B,PSMB9,LMNB1,PSME2,CASP1,PSMB8,OSM,BCL6,PSME1,SOD2,SOCS1,SDC1,ALPK1,STAT3,STAT2,MAPK14,JAK3	T0_V_T3_down
query_1	2.49639e-05	78	291	11	0.0378007	0.141026	REAC:R-HSA-1236974	REAC	ER-Phagosome pathway	TAP1,PSMB9,PSME2,PSMB8,VAMP3,LY96,PSME1,S100A9,HLA-E,TAPBP,S100A8	T0_V_T3_down
query_1	2.62968e-05	497	292	30	0.10274	0.0603622	GO:0002521	GO:BP	leukocyte differentiation	BATF2,C1QC,CEACAM1,IRF1,SMARCD3,IL27,IL15RA,SOCS3,IL1B,SLAMF8,FANCA,TNFAIP6,FCER1G,GAS6,BCL6,GBA1,LTBR,BCL3,TMEM176A,TMEM176B,SOCS1,BAK1,STAT3,MAPK14,SEMA4A,RSAD2,LILRB3,IFI16,JAK3,CLEC4D	T0_V_T3_down
query_1	2.63857e-05	133	259	17	0.0656371	0.12782	GO:0006959	GO:BP	humoral immune response	C1QC,SERPING1,JCHAIN,IGHA1,IGHA2,H2BC12,IGHG2,IL1B,IGKV3-20,IGHG1,VSIG4,CCR2,H2BC6,NOD2,HLA-E,S100A9,H2BC21	T0_V_T2_down
query_1	2.68655e-05	84	291	12	0.0412371	0.142857	GO:0032612	GO:BP	interleukin-1 production	AIM2,GBP5,CEACAM1,GAS6,CARD16,CASP1,PML,NLRC4,NAIP,NOD2,LILRB4,IFI16	T0_V_T2_down
query_1	2.68655e-05	84	291	12	0.0412371	0.142857	GO:0032652	GO:BP	regulation of interleukin-1 production	AIM2,GBP5,CEACAM1,GAS6,CARD16,CASP1,PML,NLRC4,NAIP,NOD2,LILRB4,IFI16	T0_V_T2_down
query_1	2.70112e-05	236	276	19	0.0688406	0.0805085	GO:0002366	GO:BP	leukocyte activation involved in immune response	CEACAM1,ICAM1,IL27,CD177,SOCS3,FCER1G,ANXA3,DYSF,CCR2,NBN,IFI35,NMI,CLEC4D,SBNO2,BCL6,FGL2,CD300A,IL12RB1,JAK3	T0_V_T4_down
query_1	2.70112e-05	185	271	17	0.0627306	0.0918919	GO:0031348	GO:BP	negative regulation of defense response	SERPING1,CEACAM1,RHBDF2,SLAMF8,TRIM21,TNFAIP6,PARP14,TRAFD1,NOD2,SOCS3,HLA-E,STAT2,NMI,GBA1,MAPK14,FGL2,IFI16	T0_V_T4_down
query_1	2.76698e-05	24	121	6	0.0495868	0.25	GO:0006958	GO:BP	complement activation, classical pathway	C1QC,SERPING1,IGHA1,IGHA2,IGHG2,IGHG1	T0_V_T2_down
query_1	2.76698e-05	293	291	22	0.0756014	0.0750853	GO:0002833	GO:BP	positive regulation of response to biotic stimulus	CD274,AIM2,TIFA,GBP5,TLR5,IRF1,PLSCR1,GBP2,CASP1,NLRC4,NECTIN2,OAS1,PIK3AP1,NAIP,NOD2,HLA-E,OAS3,RSAD2,PARP9,FPR2,DDX60,IFI16	T0_V_T2_down
query_1	2.91626e-05	635	276	33	0.119565	0.0519685	GO:0046649	GO:BP	lymphocyte activation	CD274,PDCD1LG2,DUSP3,IRF1,CEACAM1,ICAM1,SMARCD3,IL27,SLAMF8,IL15RA,FANCA,IL1B,NOD2,SOCS1,SOCS3,FCER1G,GAS6,HLA-E,CCR2,RSAD2,NBN,BTN3A1,BAK1,SLAMF7,GBA1,CLEC4D,BCL6,FGL2,MR1,PSMB10,CD300A,IL12RB1,JAK3	T0_V_T4_down
query_1	2.95758e-05	70	202	9	0.0445545	0.128571	GO:0045824	GO:BP	negative regulation of innate immune response	SERPING1,CEACAM1,SLAMF8,TRIM21,PARP14,TRAFD1,HLA-E,STAT2,NMI	T0_V_T4_down
query_1	3.10824e-05	420	265	23	0.0867925	0.0547619	REAC:R-HSA-6798695	REAC	Neutrophil degranulation	CD177,GPR84,CEACAM1,TNFAIP6,MCEMP1,HPSE,SELL,GYG1,SIGLEC14,LTA4H,FCER1G,FCAR,GM2A,GNS,CLEC4D,PADI2,SLC2A3,PLAUR,MAPK14,FCGR2A,S100A9,HP,FPR2	T0_V_T2_down
query_1	3.18111e-05	239	276	19	0.0688406	0.0794979	GO:0002263	GO:BP	cell activation involved in immune response	CEACAM1,ICAM1,IL27,CD177,SOCS3,FCER1G,ANXA3,DYSF,CCR2,NBN,IFI35,NMI,CLEC4D,SBNO2,BCL6,FGL2,CD300A,IL12RB1,JAK3	T0_V_T4_down
query_1	3.19025e-05	24	242	6	0.0247934	0.25	REAC:R-HSA-5620971	REAC	Pyroptosis	CASP5,IL1B,IRF1,CASP1,CASP4,BAK1	T0_V_T2_down
query_1	3.43944e-05	356	276	25	0.0905797	0.0702247	GO:0019221	GO:BP	cytokine-mediated signaling pathway	AIM2,IRF1,CEACAM1,STAT1,PARP9,IL15RA,CASP1,CARD16,PARP14,IL1B,SOCS1,IFITM3,CASP4,FCER1G,FAS,PADI2,GAS6,CCR2,CCRL2,STAT2,OSM,IFIH1,ZBP1,IL12RB1,JAK3	T0_V_T4_down
query_1	3.46803e-05	330	264	21	0.0795455	0.0636364	REAC:R-HSA-983169	REAC	Class I MHC mediated antigen processing & presentation	FCGR1A,FBXO6,UBE2L6,TAP1,TRIM21,PSMB9,PSME2,PSMB8,SOCS1,DTX3L,SOCS3,RNF213,TRIM69,PSME1,HLA-E,VAMP3,TAPBP,HLA-C,RBCK1,PSMB10,S100A9	T0_V_T4_down
query_1	3.47074e-05	291	291	23	0.0790378	0.0790378	GO:0032102	GO:BP	negative regulation of response to external stimulus	SERPING1,DUSP3,SOCS3,KREMEN1,CEACAM1,SLAMF8,TNFAIP6,RHBDF2,GRIN3A,VSIG4,GBA1,CARD16,TRIM21,OAS1,PADI2,PLAUR,MAPK14,NOD2,HLA-E,OAS3,FPR2,ZFP36,IFI16	T0_V_T2_down
query_1	3.5119e-05	460	272	28	0.102941	0.0608696	GO:0032103	GO:BP	positive regulation of response to external stimulus	AIM2,SCARF1,FCGR1A,TIFA,GBP5,TLR5,OSM,IL1B,IRF1,GAS6,PLSCR1,GBP2,CASP1,NLRC4,NECTIN2,CCR2,OAS1,PIK3AP1,NAIP,NOD2,HLA-E,CASP4,OAS3,RSAD2,PARP9,S100A9,FPR2,DDX60	T0_V_T2_down
query_1	3.5119e-05	279	291	21	0.0721649	0.0752688	GO:0045089	GO:BP	positive regulation of innate immune response	AIM2,TIFA,GBP5,TLR5,IRF1,PLSCR1,GBP2,CASP1,NLRC4,NECTIN2,OAS1,PIK3AP1,NAIP,NOD2,HLA-E,OAS3,RSAD2,PARP9,FPR2,DDX60,IFI16	T0_V_T2_down
query_1	3.58831e-05	189	199	14	0.0703518	0.0740741	GO:0006909	GO:BP	phagocytosis	FCGR1A,LIMK1,IL15RA,RAB20,ATG3,NOD2,MARCO,FCER1G,ANXA3,GAS6,DYSF,CCR2,PLSCR1,TGM2	T0_V_T4_down
query_1	3.59047e-05	651	291	37	0.127148	0.0568356	GO:0030141	GO:CC	secretory granule	SERPING1,LHFPL2,CEACAM1,CD177,TNFAIP6,PLAUR,GPR84,LTA4H,CTSA,IL1B,CLU,NPC2,SELL,GNS,FCER1G,PADI2,ANXA3,LGALS3BP,GAS6,ITGA2B,CYB561,HPSE,GYG1,VAMP3,TREML1,CLEC4D,HLA-C,MAPK14,GM2A,SPARC,FGL2,S100A9,CD300A,HP,LOXL1,EGF,LILRB3	T0_V_T4_down
query_1	3.59662e-05	68	224	10	0.0446429	0.147059	GO:0043202	GO:CC	lysosomal lumen	SDC3,CTSA,TCN2,NPC2,GNS,HPSE,GYG1,SDC1,GBA1,GM2A	T0_V_T4_down
query_1	3.59662e-05	4	101	3	0.029703	0.75	GO:0097169	GO:CC	AIM2 inflammasome complex	AIM2,CASP1,CARD16	T0_V_T4_down
query_1	3.67844e-05	20	207	6	0.0289855	0.3	GO:0002675	GO:BP	positive regulation of acute inflammatory response	FCGR1A,IL1B,HLA-E,FFAR2,FFAR3,OSM	T0_V_T4_down
query_1	3.67844e-05	149	79	9	0.113924	0.0604027	GO:0001906	GO:BP	cell killing	FCGR1A,GBP5,GBP1,APOL1,GBP2,CEACAM1,ICAM1,GBP3,H2BC12	T0_V_T4_down
query_1	3.7577e-05	759	171	29	0.169591	0.0382082	GO:0099503	GO:CC	secretory vesicle	SERPING1,SEPTIN4,LHFPL2,CEACAM1,CD177,STX11,TNFAIP6,PLAUR,GPR84,LTA4H,CTSA,IL1B,CLU,MYOF,NPC2,SELL,GNS,FCER1G,PADI2,ANXA3,LGALS3BP,GAS6,ITGA2B,DYSF,CYB561,HPSE,GYG1,VAMP3,TREML1	T0_V_T4_down
query_1	3.79923e-05	141	265	13	0.0490566	0.0921986	GO:0070820	GO:CC	tertiary granule	CD177,GPR84,CEACAM1,TNFAIP6,MCEMP1,SIGLEC14,LTA4H,FCER1G,FCAR,CLEC4D,SLC2A3,HP,FPR2	T0_V_T2_down
query_1	3.81778e-05	9	2	2	1	0.222222	GO:0098883	GO:BP	synapse pruning	C1QB,C1QC	T0_V_T2_down
query_1	4.00636e-05	2899	261	95	0.363985	0.0327699	GO:0031982	GO:CC	vesicle	SEPTIN4,CD274,CD177,FAM20A,SERPING1,IGHV3-7,GBP6,SCARF1,FCGR1A,GBP5,GBP1,JCHAIN,IGKV1-5,IGKV2-30,LHFPL2,IGHA1,GPR84,IGLV2-14,CEACAM1,IGLV3-19,IGHV3-23,SDC1,IGLV3-21,ANXA3,IGHA2,TAP1,GBP3,TNFAIP6,IGHG2,WARS1,IGLC2,ICAM1,MCEMP1,MYOF,IL1B,STX11,VAMP5,LAP3,LGALS3BP,IGKV3-20,GCH1,IGHG1,HPSE,SELL,GBP4,IGKV3-11,GAS6,GYG1,RAB20,PLSCR1,IGKV1-39,GBP2,VPS9D1,SECTM1,GBA1,SIGLEC14,IL15RA,LTA4H,FCER1G,TAPBP,HL…	T0_V_T2_down
query_1	4.42842e-05	189	277	17	0.0613718	0.0899471	GO:0034612	GO:BP	response to tumor necrosis factor	AIM2,GBP1,GBP3,GCH1,GAS6,GBP2,GBA1,CARD16,FCAR,CASP1,STAT1,TNFRSF17,MAPK14,NAIP,CASP4,CXCL16,ZFP36	T0_V_T2_down
query_1	4.52035e-05	25	271	7	0.0258303	0.28	GO:0035456	GO:BP	response to interferon-beta	AIM2,IRF1,STAT1,IFITM3,PLSCR1,XAF1,IFI16	T0_V_T4_down
query_1	4.59364e-05	61	259	12	0.046332	0.196721	GO:0019730	GO:BP	antimicrobial humoral response	JCHAIN,IGHA1,IGHA2,H2BC12,IGHG2,IGKV3-20,IGHG1,H2BC6,NOD2,HLA-E,S100A9,H2BC21	T0_V_T2_down
query_1	4.70295e-05	1444	291	63	0.216495	0.0436288	GO:0012501	GO:BP	programmed cell death	CD274,GBP5,SEPTIN4,AIM2,GBP1,KREMEN1,GBP2,ICAM1,IRF1,CASP5,ATF3,TRIM21,POLB,ADM,STAT1,PLAUR,SORT1,GADD45B,NOD2,PML,SOCS3,IL1B,CARD16,GBP3,ATG3,CASP4,CASP1,IFIT3,CLU,TNFSF10,TRIM69,TGM2,FAS,GAS6,HCAR2,DRAM1,NLRC4,G0S2,BCL6,GBA1,PLSCR1,NBN,RBCK1,RALB,XAF1,LTBR,KCNMA1,BCL3,ZBP1,SOD2,S100A9,HTATIP2,GRINA,BAK1,GADD45G,INSL3,MAPK14,PRKCD,GRN,ITPRIP,IFI16,JAK3,S100A8	T0_V_T3_down
query_1	4.85799e-05	27	258	7	0.0271318	0.259259	GO:0002474	GO:BP	antigen processing and presentation of peptide antigen via MHC class I	FCGR1A,TAP1,FCER1G,HLA-E,TAPBP,HLA-C,MR1	T0_V_T4_down
query_1	4.97349e-05	1447	291	63	0.216495	0.0435384	GO:0008219	GO:BP	cell death	CD274,GBP5,SEPTIN4,AIM2,GBP1,KREMEN1,GBP2,ICAM1,IRF1,CASP5,ATF3,TRIM21,POLB,ADM,STAT1,PLAUR,SORT1,GADD45B,NOD2,PML,SOCS3,IL1B,CARD16,GBP3,ATG3,CASP4,CASP1,IFIT3,CLU,TNFSF10,TRIM69,TGM2,FAS,GAS6,HCAR2,DRAM1,NLRC4,G0S2,BCL6,GBA1,PLSCR1,NBN,RBCK1,RALB,XAF1,LTBR,KCNMA1,BCL3,ZBP1,SOD2,S100A9,HTATIP2,GRINA,BAK1,GADD45G,INSL3,MAPK14,PRKCD,GRN,ITPRIP,IFI16,JAK3,S100A8	T0_V_T3_down
query_1	5.11082e-05	150	291	15	0.0515464	0.1	GO:0050777	GO:BP	negative regulation of immune response	SERPING1,CEACAM1,SLAMF8,RHBDF2,VSIG4,TRIM21,CCR2,OAS1,MAPK14,NOD2,HLA-E,OAS3,BCL6,LILRB4,IFI16	T0_V_T2_down
query_1	5.53702e-05	15	74	4	0.0540541	0.266667	GO:0060263	GO:BP	regulation of respiratory burst	JCHAIN,IGHA1,SLAMF8,IGHA2	T0_V_T2_down
query_1	5.73734e-05	209	273	17	0.0622711	0.0813397	GO:0002758	GO:BP	innate immune response-activating signaling pathway	GBP5,AIM2,GBP2,IRF1,TIFA,NOD2,TLR5,CASP1,PIK3AP1,FFAR2,NLRC4,LY96,NMI,IFI35,ALPK1,CD300A,RSAD2	T0_V_T3_down
query_1	5.74487e-05	60	181	8	0.0441989	0.133333	GO:0071260	GO:BP	cellular response to mechanical stimulus	IRF1,CASP5,KCNJ2,CASP1,IL1B,TLR5,FAS,BAK1	T0_V_T4_down
query_1	6.09346e-05	393	292	25	0.0856164	0.0636132	GO:1903131	GO:BP	mononuclear cell differentiation	BATF2,IRF1,SMARCD3,IL27,IL15RA,SOCS3,IL1B,SLAMF8,FANCA,FCER1G,GAS6,BCL6,GBA1,LTBR,BCL3,TMEM176A,TMEM176B,SOCS1,BAK1,STAT3,SEMA4A,RSAD2,IFI16,JAK3,CLEC4D	T0_V_T3_down
query_1	6.14849e-05	196	265	16	0.0603774	0.0816327	GO:0002221	GO:BP	pattern recognition receptor signaling pathway	GBP5,GBP2,AIM2,IRF1,TIFA,CASP1,NOD2,TLR5,PIK3AP1,RSAD2,IFI35,FFAR2,NMI,NLRC4,IFIH1,CD300A	T0_V_T4_down
query_1	6.2659e-05	2	20	2	0.1	1	GO:0140973	GO:BP	positive regulation of AIM2 inflammasome complex assembly	GBP5,GBP2	T0_V_T4_down
query_1	6.30203e-05	129	195	12	0.0615385	0.0930233	KEGG:05164	KEGG	Influenza A	ICAM1,STAT1,PML,CASP1,IL1B,SOCS3,TNFSF10,FAS,CALCOCO2,RSAD2,BAK1,STAT2	T0_V_T4_down
query_1	6.34458e-05	541	276	31	0.112319	0.0573013	GO:0002250	GO:BP	adaptive immune response	FCGR1A,CD274,SERPING1,PDCD1LG2,C1QC,IRF1,CEACAM1,TAP1,ICAM1,IL27,IL1B,NOD2,CLU,NECTIN2,SOCS3,FCER1G,HLA-E,CCR2,RSAD2,NBN,BTN3A1,SLAMF7,CLEC4D,HLA-C,BCL6,BTN3A2,MR1,IL12RB1,BTN3A3,LILRA6,JAK3	T0_V_T4_down
query_1	6.48327e-05	236	292	19	0.0650685	0.0805085	GO:0002366	GO:BP	leukocyte activation involved in immune response	CEACAM1,ICAM1,IL27,CD177,SOCS3,FCER1G,ANXA3,DYSF,BCL6,NBN,NMI,IFI35,BCL3,STAT3,CD300A,SEMA4A,GRN,JAK3,CLEC4D	T0_V_T3_down
query_1	6.59851e-05	258	269	18	0.0669145	0.0697674	GO:0002429	GO:BP	immune response-activating cell surface receptor signaling pathway	GBP1,LIMK1,DUSP3,CEACAM1,NOD2,TLR5,NECTIN2,FCER1G,PIK3AP1,BTN3A1,PLSCR1,IFI35,FFAR2,NMI,RBCK1,BTN3A2,CD300A,BTN3A3	T0_V_T4_down
query_1	6.89132e-05	25	284	7	0.0246479	0.28	GO:0035456	GO:BP	response to interferon-beta	AIM2,IRF1,STAT1,IFITM3,PLSCR1,XAF1,IFI16	T0_V_T3_down
query_1	7.16232e-05	60	249	9	0.0361446	0.15	GO:0071260	GO:BP	cellular response to mechanical stimulus	IRF1,CASP5,IL1B,TLR5,KCNJ2,CASP1,FAS,LTBR,BAK1	T0_V_T3_down
query_1	7.38536e-05	185	291	17	0.0584192	0.0918919	GO:0031348	GO:BP	negative regulation of defense response	SERPING1,SOCS3,CEACAM1,SLAMF8,TNFAIP6,RHBDF2,VSIG4,GBA1,TRIM21,OAS1,MAPK14,NOD2,HLA-E,OAS3,FPR2,ZFP36,IFI16	T0_V_T2_down
query_1	7.53517e-05	374	233	22	0.0944206	0.0588235	GO:0002683	GO:BP	negative regulation of immune system process	C1QC,CD274,PDCD1LG2,SERPING1,GBP1,DUSP3,CEACAM1,SLAMF8,TNFAIP6,RHBDF2,IRF1,VSIG4,TRIM21,CCR2,OAS1,PADI2,TMEM176B,MAPK14,NOD2,HLA-E,OAS3,SOCS1	T0_V_T2_down
query_1	7.60436e-05	239	292	19	0.0650685	0.0794979	GO:0002263	GO:BP	cell activation involved in immune response	CEACAM1,ICAM1,IL27,CD177,SOCS3,FCER1G,ANXA3,DYSF,BCL6,NBN,NMI,IFI35,BCL3,STAT3,CD300A,SEMA4A,GRN,JAK3,CLEC4D	T0_V_T3_down
query_1	7.80299e-05	651	292	37	0.126712	0.0568356	GO:0030141	GO:CC	secretory granule	SERPING1,CEACAM1,LHFPL2,PLAUR,CD177,IL1B,TNFAIP6,GPR84,SELL,FCER1G,ANXA3,CTSA,CLU,LTA4H,PADI2,HPSE,LGALS3BP,GAS6,GNS,NPC2,TREML1,ITGA2B,HP,VAMP3,GYG1,GM2A,S100A9,DYNLT1,SERPINA1,CD300A,MAPK14,PRKCD,LILRB3,SPARC,GRN,S100A8,CLEC4D	T0_V_T3_down
query_1	7.80299e-05	264	291	20	0.0687285	0.0757576	GO:0031983	GO:CC	vesicle lumen	SERPING1,CTSA,CLU,PADI2,HPSE,LGALS3BP,GAS6,GNS,NPC2,HP,GYG1,GM2A,S100A9,DYNLT1,SERPINA1,MAPK14,PRKCD,SPARC,GRN,S100A8	T0_V_T3_down
query_1	7.80299e-05	1880	292	74	0.253425	0.0393617	GO:0097708	GO:CC	intracellular vesicle	CD274,FCGR1A,SERPING1,GBP5,GBP6,SEPTIN4,GBP1,GBP2,CEACAM1,LHFPL2,SCARF1,GBP4,TAP1,TRIM21,VPS9D1,STX11,PLAUR,VAMP5,SORT1,CD177,IL15RA,RAB20,NOD2,PML,IL1B,GBP3,IFITM3,TNFAIP6,GPR84,SELL,FCER1G,ANXA3,CTSA,CLU,DYSF,SAMD9L,LTA4H,PADI2,AP5B1,MYOF,HPSE,DTX3L,LGALS3BP,GAS6,GNS,NPC2,MARCO,TREML1,CALCOCO2,GCH1,ITGA2B,HP,VAMP3,LY96,GYG1,TMEM150B,GM2A,S100A9,SOCS1,DYNLT1,SERPINA1,CD300A,MAPK14,SNX20,HLA-E,PR…	T0_V_T3_down
query_1	7.80299e-05	261	291	20	0.0687285	0.0766284	GO:0034774	GO:CC	secretory granule lumen	SERPING1,CTSA,CLU,PADI2,HPSE,LGALS3BP,GAS6,GNS,NPC2,HP,GYG1,GM2A,S100A9,DYNLT1,SERPINA1,MAPK14,PRKCD,SPARC,GRN,S100A8	T0_V_T3_down
query_1	7.80299e-05	759	292	41	0.140411	0.0540184	GO:0099503	GO:CC	secretory vesicle	SERPING1,SEPTIN4,CEACAM1,LHFPL2,STX11,PLAUR,CD177,IL1B,TNFAIP6,GPR84,SELL,FCER1G,ANXA3,CTSA,CLU,DYSF,LTA4H,PADI2,MYOF,HPSE,LGALS3BP,GAS6,GNS,NPC2,TREML1,ITGA2B,HP,VAMP3,GYG1,GM2A,S100A9,DYNLT1,SERPINA1,CD300A,MAPK14,PRKCD,LILRB3,SPARC,GRN,S100A8,CLEC4D	T0_V_T3_down
query_1	7.80299e-05	264	291	20	0.0687285	0.0757576	GO:0060205	GO:CC	cytoplasmic vesicle lumen	SERPING1,CTSA,CLU,PADI2,HPSE,LGALS3BP,GAS6,GNS,NPC2,HP,GYG1,GM2A,S100A9,DYNLT1,SERPINA1,MAPK14,PRKCD,SPARC,GRN,S100A8	T0_V_T3_down
query_1	7.80299e-05	4	117	3	0.025641	0.75	GO:0097169	GO:CC	AIM2 inflammasome complex	AIM2,CARD16,CASP1	T0_V_T3_down
query_1	7.80299e-05	1876	292	74	0.253425	0.0394456	GO:0031410	GO:CC	cytoplasmic vesicle	CD274,FCGR1A,SERPING1,GBP5,GBP6,SEPTIN4,GBP1,GBP2,CEACAM1,LHFPL2,SCARF1,GBP4,TAP1,TRIM21,VPS9D1,STX11,PLAUR,VAMP5,SORT1,CD177,IL15RA,RAB20,NOD2,PML,IL1B,GBP3,IFITM3,TNFAIP6,GPR84,SELL,FCER1G,ANXA3,CTSA,CLU,DYSF,SAMD9L,LTA4H,PADI2,AP5B1,MYOF,HPSE,DTX3L,LGALS3BP,GAS6,GNS,NPC2,MARCO,TREML1,CALCOCO2,GCH1,ITGA2B,HP,VAMP3,LY96,GYG1,TMEM150B,GM2A,S100A9,SOCS1,DYNLT1,SERPINA1,CD300A,MAPK14,SNX20,HLA-E,PR…	T0_V_T3_down
query_1	7.87308e-05	1650	282	67	0.237589	0.0406061	GO:0048584	GO:BP	positive regulation of response to stimulus	C1QC,SEPTIN4,CD274,CD177,SERPING1,AIM2,SCARF1,FCGR1A,TIFA,GBP5,GBP1,DUSP3,LIMK1,IGHA1,SMARCD3,CEACAM1,ATF3,IGHA2,TLR5,IGHG2,G0S2,ICAM1,TRIM22,OSM,IL1B,IGHG1,HPSE,IRF1,VSIG4,GAS6,PLSCR1,GBP2,GADD45B,SECTM1,CARD16,FCER1G,HLA-DPA1,TRIM21,MARCO,CASP1,PML,NLRC4,NECTIN2,CCR2,IGLC3,CLEC4D,OAS1,PIK3AP1,BMX,PLAUR,NAIP,NOD2,HLA-E,CASP4,OAS3,RALB,BAK1,RSAD2,PARP9,S100A9,TNFSF10,HLA-DRA,FPR2,DDX60,LTBR,CD38,…	T0_V_T2_down
query_1	7.88856e-05	98	291	12	0.0412371	0.122449	GO:0051092	GO:BP	positive regulation of NF-kappaB transcription factor activity	AIM2,NOD2,IL1B,CARD16,TRIM22,CLU,NLRC4,RBCK1,S100A9,STAT3,TRIM38,S100A8	T0_V_T3_down
query_1	8.03477e-05	68	244	10	0.0409836	0.147059	GO:0043202	GO:CC	lysosomal lumen	SDC3,TCN2,CTSA,HPSE,GNS,NPC2,GBA1,GYG1,GM2A,SDC1	T0_V_T3_down
query_1	8.26481e-05	541	292	32	0.109589	0.0591497	GO:0002250	GO:BP	adaptive immune response	CD274,FCGR1A,SERPING1,PDCD1LG2,C1QC,CEACAM1,ICAM1,IRF1,IL27,TAP1,NOD2,SOCS3,IL1B,NECTIN2,FCER1G,CLU,BCL6,NBN,IGHA1,BCL3,BTN3A1,STAT3,IGLV6-57,HLA-E,SEMA4A,PRKCD,RSAD2,LILRB3,LILRA6,JAK3,JCHAIN,CLEC4D	T0_V_T3_down
query_1	8.58646e-05	4	175	3	0.0171429	0.75	GO:0097169	GO:CC	AIM2 inflammasome complex	AIM2,CARD16,CASP1	T0_V_T2_down
query_1	9.40546e-05	77	199	9	0.0452261	0.116883	GO:0050764	GO:BP	regulation of phagocytosis	FCGR1A,IL15RA,ATG3,NOD2,FCER1G,GAS6,DYSF,PLSCR1,TGM2	T0_V_T4_down
query_1	9.74108e-05	2	24	2	0.0833333	1	GO:0140973	GO:BP	positive regulation of AIM2 inflammasome complex assembly	GBP5,GBP2	T0_V_T3_down
query_1	9.74108e-05	150	285	14	0.0491228	0.0933333	GO:0046631	GO:BP	alpha-beta T cell activation	CD274,IRF1,IL27,SOCS3,BCL6,ELF4,BCL3,SOCS1,STAT3,CD300A,HLA-E,SEMA4A,RSAD2,JAK3	T0_V_T3_down
query_1	9.74108e-05	77	197	9	0.0456853	0.116883	GO:0050764	GO:BP	regulation of phagocytosis	FCGR1A,IL15RA,NOD2,ATG3,FCER1G,DYSF,TGM2,GAS6,PLSCR1	T0_V_T3_down
query_1	0.000101118	2	12	2	0.166667	1	GO:0106139	GO:CC	symbiont cell surface	GBP5,GBP1	T0_V_T4_down
query_1	0.000109858	79	267	10	0.0374532	0.126582	GO:0002709	GO:BP	regulation of T cell mediated immunity	CEACAM1,IL1B,NOD2,NECTIN2,HLA-E,CCR2,RSAD2,HLA-C,MR1,IL12RB1	T0_V_T4_down
query_1	0.000109858	200	276	16	0.057971	0.08	GO:0002703	GO:BP	regulation of leukocyte mediated immunity	FCGR1A,CEACAM1,ICAM1,CD177,IL1B,NOD2,NECTIN2,HLA-E,CCR2,RSAD2,HLA-C,BCL6,MR1,CD300A,IL12RB1,JAK3	T0_V_T4_down
query_1	0.000112798	35	224	7	0.03125	0.2	WP:WP1433	WP	Nucleotide binding oligomerization domain NOD pathway	AIM2,CASP5,IL1B,CASP1,NLRC4,NAIP,NOD2	T0_V_T2_down
query_1	0.000113693	158	117	10	0.0854701	0.0632911	GO:0071222	GO:BP	cellular response to lipopolysaccharide	CD274,GBP5,PDCD1LG2,GBP2,NOD2,IL1B,CARD16,GBP3,TLR5,CASP1	T0_V_T3_down
query_1	0.00012024	1444	276	59	0.213768	0.0408587	GO:0012501	GO:BP	programmed cell death	CD274,GBP5,SEPTIN4,GBP1,GBP2,AIM2,KREMEN1,IRF1,ICAM1,STAT1,POLB,SORT1,ATF3,CASP5,TRIM21,GBP3,PML,GADD45B,ADM,PLAUR,IFIT3,ATG3,CASP1,CARD16,IL1B,NOD2,CLU,SOCS3,TNFSF10,CASP4,FAS,GADD45G,TRIM69,GAS6,NBN,PLSCR1,KCNMA1,BAK1,TGM2,SOD2,GBA1,XAF1,DRAM1,MAPK14,RBCK1,GRINA,NLRC4,HTATIP2,BCL6,G0S2,ZBP1,RALB,HCAR2,LTBR,S100A9,E2F1,IFI16,DDIAS,JAK3	T0_V_T4_down
query_1	0.000126898	1447	276	59	0.213768	0.040774	GO:0008219	GO:BP	cell death	CD274,GBP5,SEPTIN4,GBP1,GBP2,AIM2,KREMEN1,IRF1,ICAM1,STAT1,POLB,SORT1,ATF3,CASP5,TRIM21,GBP3,PML,GADD45B,ADM,PLAUR,IFIT3,ATG3,CASP1,CARD16,IL1B,NOD2,CLU,SOCS3,TNFSF10,CASP4,FAS,GADD45G,TRIM69,GAS6,NBN,PLSCR1,KCNMA1,BAK1,TGM2,SOD2,GBA1,XAF1,DRAM1,MAPK14,RBCK1,GRINA,NLRC4,HTATIP2,BCL6,G0S2,ZBP1,RALB,HCAR2,LTBR,S100A9,E2F1,IFI16,DDIAS,JAK3	T0_V_T4_down
query_1	0.000127922	189	288	16	0.0555556	0.0846561	GO:0006909	GO:BP	phagocytosis	FCGR1A,LIMK1,IL15RA,RAB20,NOD2,ATG3,FCER1G,ANXA3,DYSF,TGM2,GAS6,MARCO,PLSCR1,CD300A,PRKCD,MSR1	T0_V_T3_down
query_1	0.000130692	101	267	11	0.0411985	0.108911	GO:0002824	GO:BP	positive regulation of adaptive immune response based on somatic recombination of immune receptors built from immunoglobulin superfamily domains	FCGR1A,CD274,IL1B,NOD2,NECTIN2,HLA-E,CCR2,RSAD2,HLA-C,MR1,IL12RB1	T0_V_T4_down
query_1	0.000130692	483	276	27	0.0978261	0.0559006	GO:0050865	GO:BP	regulation of cell activation	CD274,PDCD1LG2,DUSP3,IRF1,CEACAM1,SMARCD3,IL27,SLAMF8,IL15RA,FANCA,IL1B,NOD2,SOCS1,NECTIN2,FCER1G,GAS6,HLA-E,CCR2,PLSCR1,CLEC4D,PLEK,BCL6,ACTA2,FGL2,CD300A,IL12RB1,JAK3	T0_V_T4_down
query_1	0.000131337	19	2	2	1	0.105263	GO:0150146	GO:BP	cell junction disassembly	C1QB,C1QC	T0_V_T2_down
query_1	0.000133059	209	265	16	0.0603774	0.076555	GO:0002758	GO:BP	innate immune response-activating signaling pathway	GBP5,GBP2,AIM2,IRF1,TIFA,CASP1,NOD2,TLR5,PIK3AP1,RSAD2,IFI35,FFAR2,NMI,NLRC4,IFIH1,CD300A	T0_V_T4_down
query_1	0.000134117	36	121	6	0.0495868	0.166667	GO:0002455	GO:BP	humoral immune response mediated by circulating immunoglobulin	C1QC,SERPING1,IGHA1,IGHA2,IGHG2,IGHG1	T0_V_T2_down
query_1	0.000134155	404	291	25	0.0859107	0.0618812	GO:0043065	GO:BP	positive regulation of apoptotic process	CD274,SEPTIN4,ATF3,ADM,GADD45B,PML,CLU,TNFSF10,TGM2,FAS,HCAR2,NLRC4,G0S2,BCL6,RBCK1,LTBR,KCNMA1,ZBP1,SOD2,S100A9,BAK1,GADD45G,PRKCD,GRN,S100A8	T0_V_T3_down
query_1	0.000134155	380	284	24	0.084507	0.0631579	GO:0001819	GO:BP	positive regulation of cytokine production	CD274,GBP5,AIM2,IRF1,IL27,STAT1,NOD2,IL1B,TLR5,FCER1G,CASP1,CLU,HPSE,FFAR2,OSM,NLRC4,LY96,BCL3,BTN3A1,STAT3,MAPK14,HLA-E,RSAD2,IFI16	T0_V_T3_down
query_1	0.00013542	170	228	14	0.0614035	0.0823529	GO:0071356	GO:BP	cellular response to tumor necrosis factor	AIM2,GBP1,GBP3,GAS6,GBP2,GBA1,CARD16,FCAR,CASP1,STAT1,TNFRSF17,MAPK14,NAIP,CASP4	T0_V_T2_down
query_1	0.000136753	148	265	12	0.045283	0.0810811	GO:0042581	GO:CC	specific granule	CD177,GPR84,CEACAM1,ANXA3,MCEMP1,HPSE,FCAR,CLEC4D,SLC2A3,PLAUR,HP,FPR2	T0_V_T2_down
query_1	0.000139432	11	2	2	1	0.181818	WP:WP545	WP	Complement activation	C1QB,C1QC	T0_V_T2_down
query_1	0.000141564	68	227	9	0.0396476	0.132353	GO:0043202	GO:CC	lysosomal lumen	SDC3,SDC1,TCN2,HPSE,GYG1,GBA1,GM2A,GNS,TPP1	T0_V_T2_down
query_1	0.000142211	59	163	8	0.0490798	0.135593	WP:WP5218	WP	Extrafollicular and follicular B cell activation by SARS CoV 2	MS4A1,CR2,PAX5,GPR183,IFNG-AS1,CD19,MFGE8,BACH2	T0_V_T3_up
query_1	0.000142382	22	143	5	0.034965	0.227273	GO:0042832	GO:BP	defense response to protozoan	GBP6,BATF2,GBP1,GBP4,GBP2	T0_V_T2_down
query_1	0.000145608	189	214	14	0.0654206	0.0740741	GO:0034612	GO:BP	response to tumor necrosis factor	GBP1,GBP2,AIM2,STAT1,GBP3,CASP1,CARD16,CASP4,FAS,GAS6,GCH1,NUB1,GBA1,MAPK14	T0_V_T4_down
query_1	0.000148026	170	292	15	0.0513699	0.0882353	GO:0043123	GO:BP	positive regulation of canonical NF-kappaB signal transduction	SECTM1,TIFA,TRIM21,NOD2,IL1B,CARD16,TRIM22,CASP1,TNFSF10,RBCK1,LTBR,ALPK1,TRIM38,APOL3,CLEC4D	T0_V_T3_down
query_1	0.000148238	19	134	5	0.0373134	0.263158	GO:0003094	GO:BP	glomerular filtration	JCHAIN,IGHA1,IGHA2,IGKV3-20,GAS6	T0_V_T2_down
query_1	0.000149911	330	291	21	0.0721649	0.0636364	REAC:R-HSA-983169	REAC	Class I MHC mediated antigen processing & presentation	FCGR1A,FBXO6,UBE2L6,TAP1,TRIM21,SOCS3,PSMB9,PSME2,TRIM69,DTX3L,PSMB8,RNF213,VAMP3,LY96,RBCK1,PSME1,S100A9,SOCS1,HLA-E,TAPBP,S100A8	T0_V_T3_down
query_1	0.000151989	48	20	4	0.2	0.0833333	GO:0031640	GO:BP	killing of cells of another organism	GBP5,GBP1,APOL1,GBP2	T0_V_T4_down
query_1	0.000151989	48	20	4	0.2	0.0833333	GO:0141061	GO:BP	disruption of cell in another organism	GBP5,GBP1,APOL1,GBP2	T0_V_T4_down
query_1	0.000153179	380	247	22	0.0890688	0.0578947	GO:0001819	GO:BP	positive regulation of cytokine production	CD274,AIM2,GBP5,IL27,TLR5,OSM,IL1B,HPSE,IRF1,FCER1G,HLA-DPA1,CASP1,STAT1,NLRC4,CCR2,OAS1,MAPK14,NAIP,NOD2,HLA-E,OAS3,RSAD2	T0_V_T2_down
query_1	0.000155466	2899	292	103	0.35274	0.0355295	GO:0031982	GO:CC	vesicle	CD274,FCGR1A,SERPING1,GBP5,GBP6,SEPTIN4,FAM20A,GBP1,GBP2,CEACAM1,LHFPL2,SCARF1,ICAM1,GBP4,SECTM1,WARS1,TAP1,TRIM21,VPS9D1,STX11,PLAUR,VAMP5,SORT1,CD177,IL15RA,RAB20,NOD2,PML,LAP3,IL1B,PSMB9,NECTIN2,GBP3,IFITM3,TNFAIP6,GPR84,SELL,PSME2,FCER1G,ANXA3,CTSA,CLU,DYSF,SAMD9L,TNFSF10,LTA4H,PADI2,AP5B1,MYOF,HPSE,DTX3L,PSMB8,TGM2,GK,LGALS3BP,FAS,GAS6,GNS,NUCB1,NPC2,MARCO,TREML1,CALCOCO2,GCH1,ITGA2B,GALM,GB…	T0_V_T3_down
query_1	0.000155504	2	12	2	0.166667	1	GO:0044217	GO:CC	other organism part	GBP5,GBP1	T0_V_T4_down
query_1	0.000156928	356	262	23	0.0877863	0.0646067	GO:0019221	GO:BP	cytokine-mediated signaling pathway	AIM2,CEACAM1,OSM,IL1B,IRF1,GAS6,CARD16,IL15RA,FCER1G,CCRL2,CASP1,STAT1,TNFRSF17,CCR2,IFITM3,OAS1,PADI2,NAIP,CASP4,OAS3,SOCS1,PARP9,IFI27	T0_V_T2_down
query_1	0.00015763	158	124	10	0.0806452	0.0632911	GO:0071222	GO:BP	cellular response to lipopolysaccharide	CD274,GBP5,PDCD1LG2,GBP2,GBP3,CASP1,CARD16,IL1B,NOD2,TLR5	T0_V_T4_down
query_1	0.00016172	164	117	10	0.0854701	0.0609756	GO:0071219	GO:BP	cellular response to molecule of bacterial origin	CD274,GBP5,PDCD1LG2,GBP2,NOD2,IL1B,CARD16,GBP3,TLR5,CASP1	T0_V_T3_down
query_1	0.000161836	73	284	10	0.0352113	0.136986	GO:0032611	GO:BP	interleukin-1 beta production	GBP5,AIM2,NOD2,PML,CARD16,CASP1,NLRC4,ELF4,STAT3,IFI16	T0_V_T3_down
query_1	0.000161836	73	284	10	0.0352113	0.136986	GO:0032651	GO:BP	regulation of interleukin-1 beta production	GBP5,AIM2,NOD2,PML,CARD16,CASP1,NLRC4,ELF4,STAT3,IFI16	T0_V_T3_down
query_1	0.000169487	50	20	4	0.2	0.08	GO:0141060	GO:BP	disruption of anatomical structure in another organism	GBP5,GBP1,APOL1,GBP2	T0_V_T4_down
query_1	0.000180597	449	292	26	0.0890411	0.0579065	GO:0042110	GO:BP	T cell activation	CD274,PDCD1LG2,CEACAM1,ICAM1,DUSP3,IRF1,SMARCD3,IL27,NOD2,SOCS3,IL1B,FANCA,FCER1G,BCL6,GBA1,ELF4,BCL3,SOCS1,BTN3A1,STAT3,CD300A,HLA-E,SEMA4A,RSAD2,JAK3,CLEC4D	T0_V_T3_down
query_1	0.0001807	2005	293	82	0.279863	0.0408978	GO:0051239	GO:BP	regulation of multicellular organismal process	CD274,SERPING1,GBP5,PDCD1LG2,C1QC,AIM2,GBP1,KREMEN1,CEACAM1,LIMK1,DUSP3,IRF1,SMARCD3,IL27,WARS1,TRIM21,ADM,STAT1,PLAUR,IL15RA,NOD2,PML,FGF13,IL1B,SLAMF8,CARD16,NECTIN2,IGF2BP3,TLR5,MYL9,FANCA,TNFAIP6,KCNJ2,FCER1G,CASP1,ANXA3,CLU,HPSE,TGM2,FFAR2,GAS6,HCAR2,SCN1B,OSM,GCH1,NLRC4,G0S2,TYMP,BCL6,GBA1,PLSCR1,ACTA2,B4GALT5,LY96,NMI,ELF4,XAF1,PLEK,BCL3,TMEM176A,TMEM176B,HTATIP2,SOCS1,BTN3A1,DYNLT1,GADD45…	T0_V_T3_down
query_1	0.000187682	129	258	13	0.0503876	0.100775	KEGG:05164	KEGG	Influenza A	SOCS3,ICAM1,IL1B,HLA-DPA1,CASP1,PML,STAT1,OAS1,OAS3,BAK1,RSAD2,TNFSF10,HLA-DRA	T0_V_T2_down
query_1	0.000193604	84	265	9	0.0339623	0.107143	GO:0035579	GO:CC	specific granule membrane	CD177,GPR84,CEACAM1,MCEMP1,FCAR,CLEC4D,SLC2A3,PLAUR,FPR2	T0_V_T2_down
query_1	0.000193604	2	24	2	0.0833333	1	GO:0106139	GO:CC	symbiont cell surface	GBP5,GBP1	T0_V_T2_down
query_1	0.000196633	107	267	11	0.0411985	0.102804	GO:0002821	GO:BP	positive regulation of adaptive immune response	FCGR1A,CD274,IL1B,NOD2,NECTIN2,HLA-E,CCR2,RSAD2,HLA-C,MR1,IL12RB1	T0_V_T4_down
query_1	0.000201669	21	134	5	0.0373134	0.238095	GO:0097205	GO:BP	renal filtration	JCHAIN,IGHA1,IGHA2,IGKV3-20,GAS6	T0_V_T2_down
query_1	0.000206918	4	189	3	0.015873	0.75	GO:0072557	GO:CC	IPAF inflammasome complex	CARD16,CASP1,NLRC4	T0_V_T3_down
query_1	0.00020774	73	291	10	0.0343643	0.136986	GO:0032611	GO:BP	interleukin-1 beta production	AIM2,GBP5,CARD16,CASP1,PML,NLRC4,NAIP,NOD2,LILRB4,IFI16	T0_V_T2_down
query_1	0.00020774	73	291	10	0.0343643	0.136986	GO:0032651	GO:BP	regulation of interleukin-1 beta production	AIM2,GBP5,CARD16,CASP1,PML,NLRC4,NAIP,NOD2,LILRB4,IFI16	T0_V_T2_down
query_1	0.000208679	187	265	15	0.0566038	0.0802139	GO:0002274	GO:BP	myeloid leukocyte activation	BATF2,CD177,CLU,NECTIN2,FCER1G,ANXA3,DYSF,CCR2,PLSCR1,IFI35,NMI,CLEC4D,SBNO2,LTBR,CD300A	T0_V_T4_down
query_1	0.000210396	41	250	7	0.028	0.170732	GO:0050691	GO:BP	regulation of defense response to virus by host	AIM2,IL27,TRIM22,IL1B,PML,STAT1,PARP9	T0_V_T2_down
query_1	0.000210396	3	282	3	0.0106383	1	GO:0071659	GO:BP	negative regulation of IP-10 production	OAS1,OAS3,LILRB4	T0_V_T2_down
query_1	0.000210396	483	282	27	0.0957447	0.0559006	GO:0050865	GO:BP	regulation of cell activation	CD274,PDCD1LG2,DUSP3,SMARCD3,IL27,CEACAM1,SLAMF8,IL1B,IRF1,VSIG4,GAS6,PLSCR1,IL15RA,FCER1G,HLA-DPA1,MZB1,NECTIN2,CCR2,CLEC4D,NOD2,HLA-E,SOCS1,PLEK,HLA-DRA,BCL6,CD38,LILRB4	T0_V_T2_down
query_1	0.000215494	93	292	11	0.0376712	0.11828	GO:0019882	GO:BP	antigen processing and presentation	FCGR1A,TAP1,ICAM1,GBA1,FCER1G,TAPBP,HLA-DPA1,NOD2,HLA-E,HLA-DRA,PSMB8	T0_V_T2_down
query_1	0.000215494	23	143	5	0.034965	0.217391	GO:0001562	GO:BP	response to protozoan	GBP6,BATF2,GBP1,GBP4,GBP2	T0_V_T2_down
query_1	0.000217963	31	9	3	0.333333	0.0967742	WP:WP558	WP	Complement and coagulation cascades	C1QB,C1QC,SERPING1	T0_V_T2_down
query_1	0.000225572	2	18	2	0.111111	1	GO:0106139	GO:CC	symbiont cell surface	GBP5,GBP1	T0_V_T3_down
query_1	0.000226973	195	291	16	0.0549828	0.0820513	GO:0052547	GO:BP	regulation of peptidase activity	AIM2,PLAUR,PSMB9,CARD16,CASP1,TNFSF10,PSMB8,FAS,GAS6,NLRC4,S100A9,BAK1,STAT3,GRN,IFI16,S100A8	T0_V_T3_down
query_1	0.000227616	164	124	10	0.0806452	0.0609756	GO:0071219	GO:BP	cellular response to molecule of bacterial origin	CD274,GBP5,PDCD1LG2,GBP2,GBP3,CASP1,CARD16,IL1B,NOD2,TLR5	T0_V_T4_down
query_1	0.000234782	635	292	32	0.109589	0.0503937	GO:0046649	GO:BP	lymphocyte activation	CD274,PDCD1LG2,CEACAM1,ICAM1,DUSP3,IRF1,SMARCD3,IL27,IL15RA,NOD2,SOCS3,IL1B,SLAMF8,FANCA,FCER1G,GAS6,BCL6,GBA1,NBN,ELF4,BCL3,SOCS1,BTN3A1,BAK1,STAT3,CD300A,HLA-E,SEMA4A,PRKCD,RSAD2,JAK3,CLEC4D	T0_V_T3_down
query_1	0.000245931	158	224	13	0.0580357	0.0822785	GO:0071222	GO:BP	cellular response to lipopolysaccharide	CD274,PDCD1LG2,GBP5,TLR5,GBP3,IL1B,GBP2,CARD16,FCAR,SBNO2,CASP1,MAPK14,NOD2	T0_V_T2_down
query_1	0.000250211	1831	294	75	0.255102	0.0409612	GO:0010033	GO:BP	response to organic substance	CD274,GBP5,PDCD1LG2,GBP6,AIM2,GBP1,GBP2,CEACAM1,ICAM1,FBXO6,IRF1,GBP4,ATF3,TRIM21,POLB,ADM,STAT1,SORT1,IL15RA,RAB20,NOD2,PML,PARP9,GRIN3A,SOCS3,IL1B,CARD16,GBP3,TLR5,IFITM3,SELL,GRAMD1B,CASP4,FCER1G,CASP1,ANXA3,CLU,TNFSF10,LTA4H,PADI2,PARP14,HPSE,TGM2,FFAR2,FAS,GAS6,CALCOCO2,OSM,GCH1,GBA1,PLSCR1,VAMP3,LY96,RALB,CCRL2,XAF1,CXCL16,KCNMA1,ZBP1,SOD2,S100A9,SOCS1,SDC1,BAK1,EDEM2,NUB1,STAT3,STAT2,MAPK1…	T0_V_T3_down
query_1	0.000257407	177	291	15	0.0515464	0.0847458	GO:0052548	GO:BP	regulation of endopeptidase activity	AIM2,PLAUR,PSMB9,CARD16,CASP1,TNFSF10,PSMB8,FAS,GAS6,NLRC4,S100A9,BAK1,STAT3,IFI16,S100A8	T0_V_T3_down
query_1	0.000262072	105	285	13	0.045614	0.12381	GO:0007259	GO:BP	receptor signaling pathway via JAK-STAT	STAT1,IL15RA,PARP9,SOCS3,PARP14,OSM,NMI,BCL3,SOCS1,STAT3,CD300A,STAT2,JAK3	T0_V_T3_down
query_1	0.000269034	36	2	2	1	0.0555556	WP:WP3941	WP	Oxidative damage response	C1QB,C1QC	T0_V_T2_down
query_1	0.000269034	35	2	2	1	0.0571429	WP:WP3937	WP	Microglia pathogen phagocytosis pathway	C1QB,C1QC	T0_V_T2_down
query_1	0.000269955	149	258	14	0.0542636	0.0939597	GO:0001906	GO:BP	cell killing	FCGR1A,GBP5,GBP1,CEACAM1,GBP3,H2BC12,APOL1,ICAM1,IGHG1,GBP2,NECTIN2,SLAMF7,HLA-E,HLA-DRA	T0_V_T2_down
query_1	0.000271868	404	268	23	0.0858209	0.0569307	GO:0043065	GO:BP	positive regulation of apoptotic process	CD274,SEPTIN4,ATF3,PML,GADD45B,ADM,CLU,TNFSF10,FAS,GADD45G,KCNMA1,BAK1,TGM2,SOD2,RBCK1,NLRC4,BCL6,G0S2,ZBP1,HCAR2,LTBR,S100A9,E2F1	T0_V_T4_down
query_1	0.000271868	84	154	8	0.0519481	0.0952381	GO:0032612	GO:BP	interleukin-1 production	GBP5,AIM2,CEACAM1,PML,CASP1,CARD16,NOD2,GAS6	T0_V_T4_down
query_1	0.000271868	105	289	13	0.0449827	0.12381	GO:0007259	GO:BP	receptor signaling pathway via JAK-STAT	STAT1,PARP9,IL15RA,PARP14,SOCS1,SOCS3,CCR2,STAT2,NMI,OSM,CD300A,JAK3,EGF	T0_V_T4_down
query_1	0.000271868	84	154	8	0.0519481	0.0952381	GO:0032652	GO:BP	regulation of interleukin-1 production	GBP5,AIM2,CEACAM1,PML,CASP1,CARD16,NOD2,GAS6	T0_V_T4_down
query_1	0.000271868	765	276	35	0.126812	0.0457516	GO:0030097	GO:BP	hemopoiesis	BATF2,C1QC,IRF1,CEACAM1,SMARCD3,STAT1,IL27,SLAMF8,PML,TNFAIP6,IL15RA,FANCA,IL1B,SOCS1,SOCS3,FCER1G,GAS6,CCR2,RSAD2,BAK1,SOD2,GBA1,OSM,CLEC4D,MAPK14,PLEK,SBNO2,BCL6,FGL2,LTBR,MR1,IL12RB1,IFI16,TMEM176B,JAK3	T0_V_T4_down
query_1	0.000272218	136	280	13	0.0464286	0.0955882	GO:0005775	GO:CC	vacuolar lumen	SDC3,TCN2,CTSA,PADI2,HPSE,GNS,NPC2,GBA1,GYG1,GM2A,SDC1,PRKCD,GRN	T0_V_T3_down
query_1	0.000287319	7	74	3	0.0405405	0.428571	GO:0060267	GO:BP	positive regulation of respiratory burst	JCHAIN,IGHA1,IGHA2	T0_V_T2_down
query_1	0.000296386	3	20	2	0.1	0.666667	GO:0140971	GO:BP	regulation of AIM2 inflammasome complex assembly	GBP5,GBP2	T0_V_T4_down
query_1	0.000300007	635	282	31	0.109929	0.0488189	GO:0046649	GO:BP	lymphocyte activation	CD274,PDCD1LG2,DUSP3,SOCS3,SMARCD3,IL27,CEACAM1,SLAMF8,ICAM1,IL1B,IRF1,VSIG4,GAS6,GBA1,IL15RA,FCER1G,HLA-DPA1,MZB1,CCR2,CLEC4D,SLAMF7,NOD2,HLA-E,NBN,SOCS1,BAK1,RSAD2,HLA-DRA,BCL6,CD38,LILRB4	T0_V_T2_down
query_1	0.000309994	2	24	2	0.0833333	1	GO:0044217	GO:CC	other organism part	GBP5,GBP1	T0_V_T2_down
query_1	0.000312143	15	5	2	0.4	0.133333	GO:0046007	GO:BP	negative regulation of activated T cell proliferation	CD274,PDCD1LG2	T0_V_T2_down
query_1	0.000313654	169	282	14	0.0496454	0.0828402	GO:0002819	GO:BP	regulation of adaptive immune response	CD274,FCGR1A,IL27,CEACAM1,IL1B,IRF1,NECTIN2,CCR2,NOD2,HLA-E,RSAD2,HLA-DRA,BCL6,LILRB4	T0_V_T2_down
query_1	0.000314852	4	232	3	0.012931	0.75	GO:0072557	GO:CC	IPAF inflammasome complex	CASP1,CARD16,NLRC4	T0_V_T4_down
query_1	0.00031816	182	239	14	0.0585774	0.0769231	REAC:R-HSA-8878171	REAC	Transcriptional regulation by RUNX1	SMARCD3,PML,SOCS3,PSMB9,H2BC12,MYL9,PSME2,MOV10,PSMB8,ITGA2B,H2BC5,H2BC6,PSME1,H2BC21	T0_V_T3_down
query_1	0.000318919	930	169	29	0.171598	0.0311828	GO:0030659	GO:CC	cytoplasmic vesicle membrane	FCGR1A,CD274,GBP5,GBP1,SCARF1,GBP2,LHFPL2,CEACAM1,TAP1,SORT1,VAMP5,CD177,PML,IL15RA,PLAUR,GPR84,RAB20,MARCO,DTX3L,MYOF,IFITM3,SELL,FCER1G,ANXA3,ITGA2B,DYSF,CYB561,HLA-E,VAMP3	T0_V_T4_down
query_1	0.000325622	2	18	2	0.111111	1	GO:0044217	GO:CC	other organism part	GBP5,GBP1	T0_V_T3_down
query_1	0.000328423	23	5	2	0.4	0.0869565	REAC:R-HSA-389948	REAC	PD-1 signaling	CD274,PDCD1LG2	T0_V_T2_down
query_1	0.000334632	48	24	4	0.166667	0.0833333	GO:0141061	GO:BP	disruption of cell in another organism	GBP5,GBP1,APOL1,GBP2	T0_V_T3_down
query_1	0.000334632	48	24	4	0.166667	0.0833333	GO:0031640	GO:BP	killing of cells of another organism	GBP5,GBP1,APOL1,GBP2	T0_V_T3_down
query_1	0.000336892	106	251	11	0.0438247	0.103774	GO:0050729	GO:BP	positive regulation of inflammatory response	AIM2,FCGR1A,OSM,IL1B,CASP1,NLRC4,CCR2,NAIP,HLA-E,CASP4,S100A9	T0_V_T2_down
query_1	0.000338517	353	276	21	0.076087	0.0594901	GO:0030098	GO:BP	lymphocyte differentiation	IRF1,SMARCD3,IL27,SLAMF8,IL15RA,FANCA,IL1B,SOCS1,SOCS3,FCER1G,GAS6,CCR2,RSAD2,BAK1,GBA1,CLEC4D,BCL6,FGL2,MR1,IL12RB1,JAK3	T0_V_T4_down
query_1	0.00034572	196	272	15	0.0551471	0.0765306	GO:0002221	GO:BP	pattern recognition receptor signaling pathway	AIM2,TIFA,GBP5,TLR5,IRF1,GBP2,CASP1,NLRC4,OAS1,PIK3AP1,NAIP,NOD2,OAS3,RSAD2,DDX60	T0_V_T2_down
query_1	0.000348042	41	265	9	0.0339623	0.219512	KEGG:05150	KEGG	Staphylococcus aureus infection	C1QB,C1QC,FCGR1A,ICAM1,HLA-DPA1,FCAR,FCGR2A,HLA-DRA,FPR2	T0_V_T2_down
query_1	0.000348042	58	9	3	0.333333	0.0517241	KEGG:05133	KEGG	Pertussis	C1QB,C1QC,SERPING1	T0_V_T2_down
query_1	0.000348042	75	259	11	0.042471	0.146667	KEGG:05322	KEGG	Systemic lupus erythematosus	C1QB,C1QC,FCGR1A,H2BC12,HLA-DPA1,TRIM21,H2BC5,H2BC6,FCGR2A,HLA-DRA,H2BC21	T0_V_T2_down
query_1	0.000350053	91	292	11	0.0376712	0.120879	GO:0002286	GO:BP	T cell activation involved in immune response	CEACAM1,ICAM1,IL27,SOCS3,FCER1G,BCL6,BCL3,STAT3,SEMA4A,JAK3,CLEC4D	T0_V_T3_down
query_1	0.000367529	661	165	24	0.145455	0.0363086	GO:0098657	GO:BP	import into cell	FCGR1A,LIMK1,SCARF1,CEACAM1,CACNA1E,SORT1,CD177,SLC6A12,ADM,KCNJ2,IL15RA,RAB20,ATG3,NOD2,MARCO,KCNJ15,CLU,FCER1G,ANXA3,LGALS3BP,GAS6,DYSF,CCR2,SDC1	T0_V_T4_down
query_1	0.000369602	173	276	14	0.0507246	0.0809249	KEGG:05169	KEGG	Epstein-Barr virus infection	TAP1,ICAM1,STAT1,GADD45B,FAS,GADD45G,HLA-E,BAK1,STAT2,TAPBP,HLA-C,MAPK14,E2F1,JAK3	T0_V_T4_down
query_1	0.00036978	50	24	4	0.166667	0.08	GO:0141060	GO:BP	disruption of anatomical structure in another organism	GBP5,GBP1,APOL1,GBP2	T0_V_T3_down
query_1	0.00036978	188	117	10	0.0854701	0.0531915	GO:0071216	GO:BP	cellular response to biotic stimulus	CD274,GBP5,PDCD1LG2,GBP2,NOD2,IL1B,CARD16,GBP3,TLR5,CASP1	T0_V_T3_down
query_1	0.000370122	164	224	13	0.0580357	0.0792683	GO:0071219	GO:BP	cellular response to molecule of bacterial origin	CD274,PDCD1LG2,GBP5,TLR5,GBP3,IL1B,GBP2,CARD16,FCAR,SBNO2,CASP1,MAPK14,NOD2	T0_V_T2_down
query_1	0.000370581	943	169	29	0.171598	0.0307529	GO:0012506	GO:CC	vesicle membrane	FCGR1A,CD274,GBP5,GBP1,SCARF1,GBP2,LHFPL2,CEACAM1,TAP1,SORT1,VAMP5,CD177,PML,IL15RA,PLAUR,GPR84,RAB20,MARCO,DTX3L,MYOF,IFITM3,SELL,FCER1G,ANXA3,ITGA2B,DYSF,CYB561,HLA-E,VAMP3	T0_V_T4_down
query_1	0.000371323	420	266	22	0.0827068	0.052381	REAC:R-HSA-6798695	REAC	Neutrophil degranulation	CEACAM1,CD177,TNFAIP6,PLAUR,GPR84,LTA4H,CTSA,NPC2,SELL,GNS,FCER1G,PADI2,HPSE,GYG1,CLEC4D,HLA-C,MAPK14,GM2A,FGL2,S100A9,CD300A,HP	T0_V_T4_down
query_1	0.000371977	31	250	6	0.024	0.193548	GO:0002230	GO:BP	positive regulation of defense response to virus by host	AIM2,IL27,TRIM22,PML,STAT1,PARP9	T0_V_T2_down
query_1	0.00038068	108	285	13	0.045614	0.12037	GO:0097696	GO:BP	receptor signaling pathway via STAT	STAT1,IL15RA,PARP9,SOCS3,PARP14,OSM,NMI,BCL3,SOCS1,STAT3,CD300A,STAT2,JAK3	T0_V_T3_down
query_1	0.00038068	189	266	15	0.056391	0.0793651	GO:0034612	GO:BP	response to tumor necrosis factor	AIM2,GBP1,GBP2,STAT1,CARD16,GBP3,CASP4,CASP1,FAS,GAS6,GCH1,GBA1,CXCL16,NUB1,MAPK14	T0_V_T3_down
query_1	0.000386616	42	9	3	0.333333	0.0714286	KEGG:04610	KEGG	Complement and coagulation cascades	C1QB,C1QC,SERPING1	T0_V_T2_down
query_1	0.000386952	540	289	29	0.100346	0.0537037	GO:0006897	GO:BP	endocytosis	FCGR1A,LIMK1,SCARF1,CEACAM1,SORT1,CD177,ADM,IL15RA,RAB20,ATG3,NOD2,MARCO,CLU,FCER1G,ANXA3,LGALS3BP,GAS6,DYSF,CCR2,SDC1,PLSCR1,TGM2,MICALL1,RALB,EHD1,CXCL16,CD300A,MSR1,EGF	T0_V_T4_down
query_1	0.000391106	142	291	13	0.0446735	0.0915493	GO:2000116	GO:BP	regulation of cysteine-type endopeptidase activity	AIM2,PLAUR,PSMB9,CARD16,CASP1,TNFSF10,FAS,GAS6,NLRC4,S100A9,BAK1,IFI16,S100A8	T0_V_T3_down
query_1	0.000395717	108	289	13	0.0449827	0.12037	GO:0097696	GO:BP	receptor signaling pathway via STAT	STAT1,PARP9,IL15RA,PARP14,SOCS1,SOCS3,CCR2,STAT2,NMI,OSM,CD300A,JAK3,EGF	T0_V_T4_down
query_1	0.0004076	54	254	7	0.0275591	0.12963	REAC:R-HSA-5218859	REAC	Regulated Necrosis	CASP5,IL1B,IRF1,CASP1,CASP4,BAK1,TNFSF10	T0_V_T2_down
query_1	0.000412599	1892	250	68	0.272	0.0359408	GO:0007166	GO:BP	cell surface receptor signaling pathway	FCGR1A,CD274,PDCD1LG2,GBP1,LIMK1,AIM2,KREMEN1,DUSP3,IRF1,CEACAM1,ICAM1,P2RY14,STAT1,RHBDF2,SORT1,ATF3,CD177,PML,TNFAIP6,GRIN3A,PARP9,IL15RA,PLAUR,CASP1,CARD16,PARP14,FANCA,IL1B,NOD2,SOCS1,MARCO,DTX3L,IFITM3,TLR5,NECTIN2,SOCS3,TNFSF10,CASP4,FCER1G,PIK3AP1,FAS,RNF213,PADI2,GAS6,ITGA2B,CCR2,SDC1,BTN3A1,PLSCR1,BAK1,IFI35,FFAR2,FFAR3,ITGA7,CCRL2,STAT2,NMI,OSM,CLEC4D,MAPK14,PLEK,RBCK1,BCL6,IFIH1,G0S2,B…	T0_V_T4_down
query_1	0.000414651	35	13	3	0.230769	0.0857143	WP:WP3937	WP	Microglia pathogen phagocytosis pathway	C1QB,FCGR1A,C1QC	T0_V_T3_down
query_1	0.000426372	35	189	6	0.031746	0.171429	WP:WP1433	WP	Nucleotide binding oligomerization domain NOD pathway	AIM2,CASP5,NOD2,IL1B,CASP1,NLRC4	T0_V_T3_down
query_1	0.000426372	32	266	7	0.0263158	0.21875	WP:WP5347	WP	IL 26 signaling pathways	ICAM1,STAT1,SOCS3,IL1B,ACTA2,STAT3,MAPK14	T0_V_T3_down
query_1	0.000440407	261	276	17	0.0615942	0.0651341	GO:0030217	GO:BP	T cell differentiation	IRF1,SMARCD3,IL27,FANCA,IL1B,SOCS1,SOCS3,FCER1G,CCR2,RSAD2,GBA1,CLEC4D,BCL6,FGL2,MR1,IL12RB1,JAK3	T0_V_T4_down
query_1	0.000440407	257	291	18	0.0618557	0.0700389	GO:1902105	GO:BP	regulation of leukocyte differentiation	C1QC,IRF1,CEACAM1,SMARCD3,IL27,SLAMF8,TNFAIP6,IL15RA,FANCA,SOCS1,GAS6,CCR2,BCL6,FGL2,IL12RB1,TMEM176B,JAK3,LILRB3	T0_V_T4_down
query_1	0.000440844	497	291	27	0.0927835	0.054326	GO:0002521	GO:BP	leukocyte differentiation	C1QC,BATF2,SOCS3,SMARCD3,IL27,CEACAM1,SLAMF8,TNFAIP6,IL1B,IRF1,GAS6,GBA1,IL15RA,FCER1G,SBNO2,CCR2,CLEC4D,TMEM176B,MAPK14,SOCS1,BAK1,RSAD2,HLA-DRA,BCL6,LTBR,LILRB4,IFI16	T0_V_T2_down
query_1	0.000440844	187	282	15	0.0531915	0.0802139	GO:0002274	GO:BP	myeloid leukocyte activation	CD177,BATF2,ANXA3,VSIG4,PLSCR1,FCER1G,FCAR,SBNO2,NECTIN2,CCR2,CLEC4D,DYSF,FPR2,LTBR,LILRB4	T0_V_T2_down
query_1	0.000440844	70	291	9	0.0309278	0.128571	GO:0045824	GO:BP	negative regulation of innate immune response	SERPING1,CEACAM1,SLAMF8,VSIG4,TRIM21,OAS1,HLA-E,OAS3,IFI16	T0_V_T2_down
query_1	0.000454988	3	24	2	0.0833333	0.666667	GO:0140971	GO:BP	regulation of AIM2 inflammasome complex assembly	GBP5,GBP2	T0_V_T3_down
query_1	0.000463275	16	5	2	0.4	0.125	GO:0032693	GO:BP	negative regulation of interleukin-10 production	CD274,PDCD1LG2	T0_V_T2_down
query_1	0.000463911	356	264	22	0.0833333	0.0617978	GO:0019221	GO:BP	cytokine-mediated signaling pathway	AIM2,CEACAM1,IRF1,STAT1,IL15RA,PARP9,IL1B,CARD16,IFITM3,CASP4,FCER1G,CASP1,PADI2,PARP14,FAS,GAS6,OSM,CCRL2,ZBP1,SOCS1,STAT3,STAT2	T0_V_T3_down
query_1	0.000471617	1118	292	50	0.171233	0.0447227	GO:0009967	GO:BP	positive regulation of signal transduction	GBP5,SEPTIN4,GBP2,ICAM1,SECTM1,TIFA,ATF3,TRIM21,PLAUR,GADD45B,NOD2,PML,PARP9,IL1B,CARD16,NECTIN2,TRIM22,CASP4,CASP1,TNFSF10,PARP14,HPSE,PIK3AP1,TGM2,FAS,GAS6,MARCO,OSM,G0S2,ACTA2,LY96,RBCK1,RALB,NMI,IFI35,LTBR,ZBP1,S100A9,BAK1,ALPK1,GADD45G,INSL3,STAT3,CD300A,PRKCD,RSAD2,TRIM38,APOL3,S100A8,CLEC4D	T0_V_T3_down
query_1	0.000483035	6	199	3	0.0150754	0.5	GO:0071753	GO:CC	IgM immunoglobulin complex	JCHAIN,IGKV3-20,IGLC3	T0_V_T2_down
query_1	0.000526498	188	124	10	0.0806452	0.0531915	GO:0071216	GO:BP	cellular response to biotic stimulus	CD274,GBP5,PDCD1LG2,GBP2,GBP3,CASP1,CARD16,IL1B,NOD2,TLR5	T0_V_T4_down
query_1	0.000530097	169	92	8	0.0869565	0.0473373	GO:0002819	GO:BP	regulation of adaptive immune response	CD274,FCGR1A,CEACAM1,IRF1,IL27,NOD2,IL1B,NECTIN2	T0_V_T3_down
query_1	0.000530097	71	292	9	0.0308219	0.126761	GO:0002292	GO:BP	T cell differentiation involved in immune response	IL27,SOCS3,FCER1G,BCL6,BCL3,STAT3,SEMA4A,JAK3,CLEC4D	T0_V_T3_down
query_1	0.000539846	96	276	10	0.0362319	0.104167	GO:0046634	GO:BP	regulation of alpha-beta T cell activation	CD274,IRF1,IL27,SOCS1,HLA-E,CCR2,BCL6,CD300A,IL12RB1,JAK3	T0_V_T4_down
query_1	0.000539846	19	31	3	0.0967742	0.157895	GO:0150146	GO:BP	cell junction disassembly	C1QB,C1QC,DUSP3	T0_V_T4_down
query_1	0.000544446	97	267	10	0.0374532	0.103093	GO:0032649	GO:BP	regulation of type II interferon production	CD274,PDCD1LG2,IL27,IL1B,NOD2,GAS6,CCR2,BTN3A1,BTN3A2,IL12RB1	T0_V_T4_down
query_1	0.000546189	170	256	13	0.0507812	0.0764706	GO:0043123	GO:BP	positive regulation of canonical NF-kappaB signal transduction	TIFA,SECTM1,TRIM21,TRIM22,CASP1,CARD16,IL1B,NOD2,TNFSF10,APOL3,CLEC4D,RBCK1,LTBR	T0_V_T4_down
query_1	0.000554739	2005	276	76	0.275362	0.0379052	GO:0051239	GO:BP	regulation of multicellular organismal process	CD274,GBP5,SERPING1,PDCD1LG2,GBP1,C1QC,LIMK1,AIM2,KREMEN1,DUSP3,IRF1,CEACAM1,SMARCD3,STAT1,WARS1,IL27,SLAMF8,TRIM21,IGF2BP3,PML,TNFAIP6,ADM,KCNJ2,IL15RA,PLAUR,MYL9,CASP1,FGF13,CARD16,FANCA,IL1B,NOD2,SOCS1,CLU,TLR5,NECTIN2,TYMP,FCER1G,GADD45G,ANXA3,GAS6,GCH1,HPSE,HLA-E,CCR2,RSAD2,PLAAT4,BTN3A1,PLSCR1,FFAR2,FFAR3,TGM2,NMI,GBA1,XAF1,OSM,CLEC4D,MAPK14,PLEK,SPARC,NLRC4,HTATIP2,BCL6,IFIH1,ACTA2,G0S2,SC…	T0_V_T4_down
query_1	0.000556295	189	224	13	0.0580357	0.0687831	GO:0006909	GO:BP	phagocytosis	FCGR1A,LIMK1,ANXA3,GAS6,RAB20,PLSCR1,IL15RA,FCER1G,MARCO,CCR2,ATG3,DYSF,NOD2	T0_V_T2_down
query_1	0.000560276	182	155	11	0.0709677	0.0604396	REAC:R-HSA-8878171	REAC	Transcriptional regulation by RUNX1	SMARCD3,PSMB9,PML,PSME2,H2BC12,PSMB8,MYL9,MOV10,SOCS3,PSME1,ITGA2B	T0_V_T4_down
query_1	0.000572983	97	267	10	0.0374532	0.103093	GO:0032609	GO:BP	type II interferon production	CD274,PDCD1LG2,IL27,IL1B,NOD2,GAS6,CCR2,BTN3A1,BTN3A2,IL12RB1	T0_V_T4_down
query_1	0.00058036	154	282	13	0.0460993	0.0844156	GO:0002822	GO:BP	regulation of adaptive immune response based on somatic recombination of immune receptors built from immunoglobulin superfamily domains	CD274,FCGR1A,IL27,CEACAM1,IL1B,NECTIN2,CCR2,NOD2,HLA-E,RSAD2,HLA-DRA,BCL6,LILRB4	T0_V_T2_down
query_1	0.00058036	66	259	10	0.03861	0.151515	GO:0050830	GO:BP	defense response to Gram-positive bacterium	GBP6,H2BC12,IL1B,GBP4,GBP2,H2BC6,NOD2,HLA-E,CASP4,H2BC21	T0_V_T2_down
query_1	0.00058036	19	282	5	0.0177305	0.263158	GO:2001185	GO:BP	regulation of CD8-positive, alpha-beta T cell activation	CD274,IRF1,HLA-E,SOCS1,LILRB4	T0_V_T2_down
query_1	0.000611883	80	285	10	0.0350877	0.125	GO:1902106	GO:BP	negative regulation of leukocyte differentiation	C1QC,CEACAM1,IRF1,TNFAIP6,BCL6,TMEM176A,TMEM176B,SOCS1,LILRB3,JAK3	T0_V_T3_down
query_1	0.000611883	66	114	7	0.0614035	0.106061	GO:0050830	GO:BP	defense response to Gram-positive bacterium	GBP6,GBP2,GBP4,NOD2,IL1B,H2BC12,CASP4	T0_V_T3_down
query_1	0.000615164	187	292	15	0.0513699	0.0802139	GO:0002274	GO:BP	myeloid leukocyte activation	BATF2,CD177,NECTIN2,FCER1G,ANXA3,CLU,DYSF,PLSCR1,NMI,IFI35,LTBR,CD300A,PRKCD,GRN,CLEC4D	T0_V_T3_down
query_1	0.000615164	48	213	7	0.0328638	0.145833	GO:0002752	GO:BP	cell surface pattern recognition receptor signaling pathway	NOD2,TLR5,PIK3AP1,FFAR2,LY96,NMI,IFI35	T0_V_T3_down
query_1	0.00062255	66	161	8	0.0496894	0.121212	GO:0050830	GO:BP	defense response to Gram-positive bacterium	GBP6,GBP2,GBP4,H2BC12,IL1B,NOD2,CASP4,HLA-E	T0_V_T4_down
query_1	0.000631737	173	274	13	0.0474453	0.0751445	KEGG:05169	KEGG	Epstein-Barr virus infection	TAP1,ICAM1,GADD45B,TAPBP,HLA-DPA1,STAT1,OAS1,MAPK14,HLA-E,OAS3,BAK1,HLA-DRA,E2F1	T0_V_T2_down
query_1	0.000631737	103	258	11	0.0426357	0.106796	KEGG:04514	KEGG	Cell adhesion molecules	CD274,PDCD1LG2,SDC3,SDC1,ICAM1,SELL,HLA-DPA1,NECTIN2,LRRC4,HLA-E,HLA-DRA	T0_V_T2_down
query_1	0.000633058	157	291	14	0.04811	0.089172	GO:0051091	GO:BP	positive regulation of DNA-binding transcription factor activity	AIM2,TRIM21,NOD2,IL1B,CARD16,TRIM22,ANXA3,CLU,NLRC4,RBCK1,S100A9,STAT3,TRIM38,S100A8	T0_V_T3_down
query_1	0.000638998	80	291	10	0.0343643	0.125	GO:1902106	GO:BP	negative regulation of leukocyte differentiation	C1QC,IRF1,CEACAM1,TNFAIP6,SOCS1,BCL6,FGL2,TMEM176B,JAK3,LILRB3	T0_V_T4_down
query_1	0.00064236	31	13	3	0.230769	0.0967742	WP:WP558	WP	Complement and coagulation cascades	C1QB,SERPING1,C1QC	T0_V_T3_down
query_1	0.000647703	136	224	11	0.0491071	0.0808824	GO:0005775	GO:CC	vacuolar lumen	SDC3,CTSA,TCN2,NPC2,GNS,PADI2,HPSE,GYG1,SDC1,GBA1,GM2A	T0_V_T4_down
query_1	0.000655081	91	23	4	0.173913	0.043956	GO:0042157	GO:BP	lipoprotein metabolic process	APOL1,APOL6,APOL2,APOL4	T0_V_T4_down
query_1	0.000655081	26	103	4	0.038835	0.153846	GO:0060333	GO:BP	type II interferon-mediated signaling pathway	IRF1,STAT1,PARP9,PARP14	T0_V_T4_down
query_1	0.000661889	4	282	3	0.0106383	0.75	GO:0071658	GO:BP	regulation of IP-10 production	OAS1,OAS3,LILRB4	T0_V_T2_down
query_1	0.000661889	4	282	3	0.0106383	0.75	GO:0071612	GO:BP	IP-10 production	OAS1,OAS3,LILRB4	T0_V_T2_down
query_1	0.000684438	209	272	15	0.0551471	0.0717703	GO:0002758	GO:BP	innate immune response-activating signaling pathway	AIM2,TIFA,GBP5,TLR5,IRF1,GBP2,CASP1,NLRC4,OAS1,PIK3AP1,NAIP,NOD2,OAS3,RSAD2,DDX60	T0_V_T2_down
query_1	0.000688446	58	113	6	0.0530973	0.103448	KEGG:05133	KEGG	Pertussis	SERPING1,C1QB,C1QC,IRF1,CASP1,IL1B	T0_V_T4_down
query_1	0.000692696	1388	207	45	0.217391	0.0324207	GO:0071310	GO:BP	cellular response to organic substance	CD274,GBP5,PDCD1LG2,GBP6,GBP1,GBP2,AIM2,GBP4,IRF1,CEACAM1,ICAM1,STAT1,ATF3,GBP3,PML,PARP9,IL15RA,RAB20,CASP1,CARD16,PARP14,IL1B,NOD2,SOCS1,IFITM3,TLR5,SOCS3,CASP4,FCER1G,FAS,PADI2,GRAMD1B,GAS6,CCR2,VAMP3,BAK1,FFAR2,FFAR3,ADCY3,CCRL2,STAT2,TGM2,SOD2,GBA1,OSM	T0_V_T4_down
query_1	0.000692696	34	207	6	0.0289855	0.176471	GO:0002673	GO:BP	regulation of acute inflammatory response	FCGR1A,IL1B,HLA-E,FFAR2,FFAR3,OSM	T0_V_T4_down
query_1	0.000696538	22	36	3	0.0833333	0.136364	GO:0050860	GO:BP	negative regulation of T cell receptor signaling pathway	GBP1,DUSP3,CEACAM1	T0_V_T4_down
query_1	0.000696538	243	292	18	0.0616438	0.0740741	GO:0032496	GO:BP	response to lipopolysaccharide	CD274,GBP5,PDCD1LG2,GBP2,GBP3,ADM,CASP1,CARD16,IL1B,NOD2,TLR5,GCH1,SOD2,MAPK14,SBNO2,S100A9,LOXL1,MAOB	T0_V_T4_down
query_1	0.000698616	35	16	3	0.1875	0.0857143	WP:WP3937	WP	Microglia pathogen phagocytosis pathway	FCGR1A,C1QB,C1QC	T0_V_T4_down
query_1	0.000698616	35	114	5	0.0438596	0.142857	WP:WP1433	WP	Nucleotide binding oligomerization domain NOD pathway	AIM2,CASP5,CASP1,IL1B,NOD2	T0_V_T4_down
query_1	0.000698937	274	289	18	0.0622837	0.0656934	GO:0030139	GO:CC	endocytic vesicle	FCGR1A,SCARF1,TAP1,VPS9D1,RAB20,NOD2,MARCO,ANXA3,DYSF,HLA-E,VAMP3,TAPBP,HLA-C,SPARC,EHD1,HP,MSR1,EGF	T0_V_T4_down
query_1	0.000702387	80	265	9	0.0339623	0.1125	GO:0002275	GO:BP	myeloid cell activation involved in immune response	CD177,FCER1G,ANXA3,DYSF,CCR2,IFI35,NMI,SBNO2,CD300A	T0_V_T4_down
query_1	0.000702413	1079	291	48	0.164948	0.0444856	GO:0043067	GO:BP	regulation of programmed cell death	CD274,GBP5,SEPTIN4,GBP1,GBP2,ICAM1,CASP5,ATF3,ADM,STAT1,PLAUR,GADD45B,NOD2,PML,SOCS3,IL1B,CARD16,GBP3,CASP4,CASP1,IFIT3,CLU,TNFSF10,TGM2,FAS,GAS6,HCAR2,NLRC4,G0S2,BCL6,GBA1,RBCK1,LTBR,KCNMA1,BCL3,ZBP1,SOD2,S100A9,HTATIP2,GRINA,BAK1,GADD45G,INSL3,PRKCD,GRN,ITPRIP,JAK3,S100A8	T0_V_T3_down
query_1	0.000703025	449	282	24	0.0851064	0.0534521	GO:0042110	GO:BP	T cell activation	CD274,PDCD1LG2,DUSP3,SOCS3,SMARCD3,IL27,CEACAM1,ICAM1,IL1B,IRF1,VSIG4,GBA1,FCER1G,HLA-DPA1,CCR2,CLEC4D,SLAMF7,NOD2,HLA-E,SOCS1,RSAD2,HLA-DRA,BCL6,LILRB4	T0_V_T2_down
query_1	0.000703025	290	282	19	0.0673759	0.0655172	GO:0002697	GO:BP	regulation of immune effector process	CD177,SERPING1,FCGR1A,IL27,CEACAM1,SLAMF8,ICAM1,IL1B,VSIG4,MZB1,NECTIN2,CCR2,NOD2,HLA-E,RSAD2,HLA-DRA,BCL6,DDX60,LILRB4	T0_V_T2_down
query_1	0.000721231	753	91	18	0.197802	0.0239044	GO:0051241	GO:BP	negative regulation of multicellular organismal process	CD274,SERPING1,PDCD1LG2,C1QC,GBP1,KREMEN1,CEACAM1,DUSP3,IRF1,ADM,STAT1,PLAUR,NOD2,PML,FGF13,IL1B,SLAMF8,CARD16	T0_V_T3_down
query_1	0.000721231	15	8	2	0.25	0.133333	GO:0046007	GO:BP	negative regulation of activated T cell proliferation	CD274,PDCD1LG2	T0_V_T3_down
query_1	0.000721231	1387	291	57	0.195876	0.0410959	GO:0006915	GO:BP	apoptotic process	CD274,SEPTIN4,KREMEN1,ICAM1,IRF1,CASP5,ATF3,POLB,ADM,STAT1,PLAUR,SORT1,GADD45B,NOD2,PML,SOCS3,IL1B,CARD16,ATG3,CASP4,CASP1,IFIT3,CLU,TNFSF10,TRIM69,TGM2,FAS,GAS6,HCAR2,DRAM1,NLRC4,G0S2,BCL6,GBA1,PLSCR1,NBN,RBCK1,RALB,XAF1,LTBR,KCNMA1,BCL3,ZBP1,SOD2,S100A9,HTATIP2,GRINA,BAK1,GADD45G,INSL3,MAPK14,PRKCD,GRN,ITPRIP,IFI16,JAK3,S100A8	T0_V_T3_down
query_1	0.000721231	22	35	3	0.0857143	0.136364	GO:0050860	GO:BP	negative regulation of T cell receptor signaling pathway	GBP1,CEACAM1,DUSP3	T0_V_T3_down
query_1	0.000723092	243	117	11	0.0940171	0.0452675	GO:0032496	GO:BP	response to lipopolysaccharide	CD274,GBP5,PDCD1LG2,GBP2,ADM,NOD2,IL1B,CARD16,GBP3,TLR5,CASP1	T0_V_T3_down
query_1	0.000732929	142	271	12	0.0442804	0.084507	GO:2000116	GO:BP	regulation of cysteine-type endopeptidase activity	AIM2,PSMB9,PLAUR,CASP1,CARD16,TNFSF10,FAS,GAS6,BAK1,NLRC4,S100A9,IFI16	T0_V_T4_down
query_1	0.00073785	77	265	9	0.0339623	0.116883	GO:0050764	GO:BP	regulation of phagocytosis	FCGR1A,GAS6,PLSCR1,IL15RA,FCER1G,ATG3,DYSF,NOD2,FPR2	T0_V_T2_down
query_1	0.000747494	22	5	2	0.4	0.0909091	WP:WP4585	WP	Cancer immunotherapy by PD 1 blockade	CD274,PDCD1LG2	T0_V_T2_down
query_1	0.000747494	72	9	3	0.333333	0.0416667	WP:WP5090	WP	Complement system in neuronal development and plasticity	C1QB,C1QC,SERPING1	T0_V_T2_down
query_1	0.000773177	1543	261	55	0.210728	0.0356448	GO:0070062	GO:CC	extracellular exosome	CD274,CD177,FAM20A,SERPING1,IGHV3-7,GBP6,JCHAIN,IGKV1-5,IGKV2-30,IGHA1,IGLV2-14,CEACAM1,IGLV3-19,IGHV3-23,SDC1,IGLV3-21,ANXA3,IGHA2,IGHG2,WARS1,IGLC2,ICAM1,MYOF,VAMP5,LAP3,LGALS3BP,IGKV3-20,IGHG1,IGKV3-11,GAS6,PLSCR1,IGKV1-39,SECTM1,GBA1,LTA4H,H2BC5,GM2A,NECTIN2,GNS,IGLC3,PADI2,SLC2A3,GALM,H2BC6,DYSF,HLA-E,TPP1,GK,RALB,CDK5RAP2,S100A9,TNFSF10,HLA-DRA,H2BC21,HP	T0_V_T2_down
query_1	0.000776172	227	292	16	0.0547945	0.0704846	GO:0043122	GO:BP	regulation of canonical NF-kappaB signal transduction	SECTM1,TIFA,TRIM21,STAT1,NOD2,IL1B,CARD16,TRIM22,CASP1,TNFSF10,RBCK1,LTBR,ALPK1,TRIM38,APOL3,CLEC4D	T0_V_T3_down
query_1	0.000778582	19	35	3	0.0857143	0.157895	GO:0150146	GO:BP	cell junction disassembly	C1QB,C1QC,DUSP3	T0_V_T3_down
query_1	0.00078607	41	30	4	0.133333	0.097561	KEGG:05150	KEGG	Staphylococcus aureus infection	C1QB,FCGR1A,C1QC,ICAM1	T0_V_T3_down
query_1	0.00078607	129	273	12	0.043956	0.0930233	KEGG:05164	KEGG	Influenza A	ICAM1,STAT1,PML,SOCS3,IL1B,CASP1,TNFSF10,FAS,CALCOCO2,BAK1,STAT2,RSAD2	T0_V_T3_down
query_1	0.00078607	58	117	6	0.0512821	0.103448	KEGG:05133	KEGG	Pertussis	C1QB,SERPING1,C1QC,IRF1,IL1B,CASP1	T0_V_T3_down
query_1	0.00078607	85	292	10	0.0342466	0.117647	KEGG:04625	KEGG	C-type lectin receptor signaling pathway	IRF1,STAT1,IL1B,FCER1G,CASP1,BCL3,STAT2,MAPK14,PRKCD,CLEC4D	T0_V_T3_down
query_1	0.000786845	92	231	9	0.038961	0.0978261	GO:0002832	GO:BP	negative regulation of response to biotic stimulus	SERPING1,CEACAM1,SLAMF8,VSIG4,CARD16,TRIM21,OAS1,HLA-E,OAS3	T0_V_T2_down
query_1	0.000798839	5	226	3	0.0132743	0.6	GO:0001788	GO:BP	antibody-dependent cellular cytotoxicity	FCGR1A,IGHG1,HLA-E	T0_V_T2_down
query_1	0.000804261	15	9	2	0.222222	0.133333	GO:0046007	GO:BP	negative regulation of activated T cell proliferation	CD274,PDCD1LG2	T0_V_T4_down
query_1	0.000806359	90	276	10	0.0362319	0.111111	GO:0002698	GO:BP	negative regulation of immune effector process	SERPING1,CEACAM1,SLAMF8,NOD2,HLA-E,CCR2,BCL6,FGL2,CD300A,JAK3	T0_V_T4_down
query_1	0.000807683	443	282	24	0.0851064	0.0541761	GO:0002694	GO:BP	regulation of leukocyte activation	CD274,PDCD1LG2,DUSP3,SMARCD3,IL27,SLAMF8,IL1B,IRF1,VSIG4,GAS6,PLSCR1,IL15RA,HLA-DPA1,MZB1,NECTIN2,CCR2,CLEC4D,NOD2,HLA-E,SOCS1,HLA-DRA,BCL6,CD38,LILRB4	T0_V_T2_down
query_1	0.000814103	765	292	35	0.119863	0.0457516	GO:0030097	GO:BP	hemopoiesis	BATF2,C1QC,CEACAM1,IRF1,SMARCD3,IL27,STAT1,IL15RA,PML,SOCS3,IL1B,SLAMF8,FANCA,TNFAIP6,FCER1G,GAS6,OSM,BCL6,GBA1,PLEK,LTBR,BCL3,TMEM176A,SOD2,TMEM176B,SOCS1,BAK1,STAT3,MAPK14,SEMA4A,RSAD2,LILRB3,IFI16,JAK3,CLEC4D	T0_V_T3_down
query_1	0.000814103	111	291	11	0.0378007	0.0990991	GO:2001235	GO:BP	positive regulation of apoptotic signaling pathway	SEPTIN4,ATF3,PML,TNFSF10,FAS,G0S2,RBCK1,LTBR,S100A9,PRKCD,S100A8	T0_V_T3_down
query_1	0.000814103	483	292	26	0.0890411	0.0538302	GO:0050865	GO:BP	regulation of cell activation	CD274,PDCD1LG2,CEACAM1,DUSP3,IRF1,SMARCD3,IL27,IL15RA,NOD2,IL1B,SLAMF8,NECTIN2,FANCA,FCER1G,GAS6,BCL6,PLSCR1,ACTA2,PLEK,SOCS1,CD300A,HLA-E,PRKCD,GRN,JAK3,CLEC4D	T0_V_T3_down
query_1	0.000814103	83	285	10	0.0350877	0.120482	GO:1903707	GO:BP	negative regulation of hemopoiesis	C1QC,CEACAM1,IRF1,TNFAIP6,BCL6,TMEM176A,TMEM176B,SOCS1,LILRB3,JAK3	T0_V_T3_down
query_1	0.000821011	211	36	6	0.166667	0.028436	GO:0007162	GO:BP	negative regulation of cell adhesion	CD274,PDCD1LG2,GBP1,DUSP3,IRF1,CEACAM1	T0_V_T4_down
query_1	0.000825908	4	262	3	0.0114504	0.75	GO:1990111	GO:CC	spermatoproteasome complex	PSMB9,PSMB8,PSMB10	T0_V_T4_down
query_1	0.000838039	32	74	4	0.0540541	0.125	GO:0045730	GO:BP	respiratory burst	JCHAIN,IGHA1,SLAMF8,IGHA2	T0_V_T2_down
query_1	0.000856125	141	272	13	0.0477941	0.0921986	GO:0016064	GO:BP	immunoglobulin mediated immune response	FCGR1A,SERPING1,C1QC,NOD2,NECTIN2,FCER1G,CLU,BCL6,NBN,IGHA1,BCL3,HLA-E,PRKCD	T0_V_T3_down
query_1	0.000856125	1892	275	72	0.261818	0.038055	GO:0007166	GO:BP	cell surface receptor signaling pathway	CD274,FCGR1A,PDCD1LG2,AIM2,GBP1,KREMEN1,CEACAM1,ICAM1,LIMK1,DUSP3,P2RY14,IRF1,ATF3,STAT1,PLAUR,RHBDF2,SORT1,CD177,IL15RA,NOD2,PML,PARP9,GRIN3A,SOCS3,IL1B,CARD16,NECTIN2,TLR5,FANCA,IFITM3,TNFAIP6,CASP4,FCER1G,CASP1,TNFSF10,PADI2,PARP14,PIK3AP1,DTX3L,FFAR2,FAS,GAS6,RNF213,MARCO,OSM,ITGA2B,G0S2,BCL6,PLSCR1,LY96,RBCK1,RALB,NMI,IFI35,IGHA1,CCRL2,PLEK,LTBR,BCL3,ZBP1,SOCS1,BTN3A1,SDC1,ITGA7,BAK1,STAT3,C…	T0_V_T3_down
query_1	0.000856125	1183	285	50	0.175439	0.0422654	GO:0048585	GO:BP	negative regulation of response to stimulus	SERPING1,AIM2,GBP1,KREMEN1,RMI2,CEACAM1,ICAM1,DUSP3,ATF3,TRIM21,ADM,STAT1,PLAUR,RHBDF2,NOD2,GRIN3A,SOCS3,IL1B,SLAMF8,CARD16,TNFAIP6,TRAFD1,CLU,PADI2,PARP14,GAS6,RNF213,BCL6,GBA1,NMI,IFI35,ELF4,PLEK,BCL3,SOD2,SOCS1,GRINA,BAK1,STAT3,CD300A,STAT2,MAPK14,HLA-E,SEMA4A,PRKCD,GRN,ITPRIP,TRIM38,IFI16,JAK3	T0_V_T3_down
query_1	0.000862507	83	291	10	0.0343643	0.120482	GO:1903707	GO:BP	negative regulation of hemopoiesis	C1QC,IRF1,CEACAM1,TNFAIP6,SOCS1,BCL6,FGL2,TMEM176B,JAK3,LILRB3	T0_V_T4_down
query_1	0.000863562	258	292	17	0.0582192	0.0658915	GO:0007249	GO:BP	canonical NF-kappaB signal transduction	SECTM1,TIFA,TRIM21,STAT1,NOD2,IL1B,CARD16,TRIM22,CASP1,TNFSF10,RBCK1,LTBR,BCL3,ALPK1,TRIM38,APOL3,CLEC4D	T0_V_T3_down
query_1	0.000864639	93	289	10	0.0346021	0.107527	GO:0019882	GO:BP	antigen processing and presentation	FCGR1A,ICAM1,TAP1,NOD2,FCER1G,PSMB8,GBA1,PSME1,HLA-E,TAPBP	T0_V_T3_down
query_1	0.000875917	81	2	2	1	0.0246914	KEGG:05142	KEGG	Chagas disease	C1QB,C1QC	T0_V_T2_down
query_1	0.000895099	60	276	8	0.0289855	0.133333	GO:0071260	GO:BP	cellular response to mechanical stimulus	CASP5,TLR5,IL1B,IRF1,CASP1,KCNJ2,BAK1,LTBR	T0_V_T2_down
query_1	0.000906134	79	285	9	0.0315789	0.113924	GO:0043367	GO:BP	CD4-positive, alpha-beta T cell differentiation	IL27,SOCS3,BCL6,BCL3,SOCS1,STAT3,SEMA4A,RSAD2,JAK3	T0_V_T3_down
query_1	0.000907574	227	291	16	0.0549828	0.0704846	GO:0002218	GO:BP	activation of innate immune response	AIM2,TIFA,GBP5,TLR5,IRF1,GBP2,CASP1,NLRC4,OAS1,PIK3AP1,NAIP,NOD2,OAS3,RSAD2,DDX60,IFI16	T0_V_T2_down
query_1	0.000910102	68	282	10	0.035461	0.147059	GO:0050853	GO:BP	B cell receptor signaling pathway	MS4A1,FCRL3,STAP1,BLK,CD19,FCMR,BANK1,BLNK,CD22,CD79B	T0_V_T4_up
query_1	0.000911114	91	276	10	0.0362319	0.10989	GO:0002286	GO:BP	T cell activation involved in immune response	CEACAM1,ICAM1,IL27,SOCS3,FCER1G,CLEC4D,BCL6,FGL2,IL12RB1,JAK3	T0_V_T4_down
query_1	0.000924235	59	2	2	1	0.0338983	WP:WP2328	WP	Allograft rejection	C1QB,C1QC	T0_V_T2_down
query_1	0.000947226	148	267	12	0.0449438	0.0810811	GO:0002706	GO:BP	regulation of lymphocyte mediated immunity	FCGR1A,CEACAM1,IL1B,NOD2,NECTIN2,HLA-E,CCR2,RSAD2,HLA-C,BCL6,MR1,IL12RB1	T0_V_T4_down
query_1	0.000957777	79	282	9	0.0319149	0.113924	GO:0002709	GO:BP	regulation of T cell mediated immunity	CEACAM1,IL1B,NECTIN2,CCR2,NOD2,HLA-E,RSAD2,HLA-DRA,LILRB4	T0_V_T2_down
query_1	0.000958479	188	224	13	0.0580357	0.0691489	GO:0071216	GO:BP	cellular response to biotic stimulus	CD274,PDCD1LG2,GBP5,TLR5,GBP3,IL1B,GBP2,CARD16,FCAR,SBNO2,CASP1,MAPK14,NOD2	T0_V_T2_down
query_1	0.000959394	144	272	13	0.0477941	0.0902778	GO:0019724	GO:BP	B cell mediated immunity	FCGR1A,SERPING1,C1QC,NOD2,NECTIN2,FCER1G,CLU,BCL6,NBN,IGHA1,BCL3,HLA-E,PRKCD	T0_V_T3_down
query_1	0.000962821	1556	261	55	0.210728	0.035347	GO:0065010	GO:CC	extracellular membrane-bounded organelle	CD274,CD177,FAM20A,SERPING1,IGHV3-7,GBP6,JCHAIN,IGKV1-5,IGKV2-30,IGHA1,IGLV2-14,CEACAM1,IGLV3-19,IGHV3-23,SDC1,IGLV3-21,ANXA3,IGHA2,IGHG2,WARS1,IGLC2,ICAM1,MYOF,VAMP5,LAP3,LGALS3BP,IGKV3-20,IGHG1,IGKV3-11,GAS6,PLSCR1,IGKV1-39,SECTM1,GBA1,LTA4H,H2BC5,GM2A,NECTIN2,GNS,IGLC3,PADI2,SLC2A3,GALM,H2BC6,DYSF,HLA-E,TPP1,GK,RALB,CDK5RAP2,S100A9,TNFSF10,HLA-DRA,H2BC21,HP	T0_V_T2_down
query_1	0.000962821	1556	261	55	0.210728	0.035347	GO:0043230	GO:CC	extracellular organelle	CD274,CD177,FAM20A,SERPING1,IGHV3-7,GBP6,JCHAIN,IGKV1-5,IGKV2-30,IGHA1,IGLV2-14,CEACAM1,IGLV3-19,IGHV3-23,SDC1,IGLV3-21,ANXA3,IGHA2,IGHG2,WARS1,IGLC2,ICAM1,MYOF,VAMP5,LAP3,LGALS3BP,IGKV3-20,IGHG1,IGKV3-11,GAS6,PLSCR1,IGKV1-39,SECTM1,GBA1,LTA4H,H2BC5,GM2A,NECTIN2,GNS,IGLC3,PADI2,SLC2A3,GALM,H2BC6,DYSF,HLA-E,TPP1,GK,RALB,CDK5RAP2,S100A9,TNFSF10,HLA-DRA,H2BC21,HP	T0_V_T2_down
query_1	0.000962821	1555	261	55	0.210728	0.0353698	GO:1903561	GO:CC	extracellular vesicle	CD274,CD177,FAM20A,SERPING1,IGHV3-7,GBP6,JCHAIN,IGKV1-5,IGKV2-30,IGHA1,IGLV2-14,CEACAM1,IGLV3-19,IGHV3-23,SDC1,IGLV3-21,ANXA3,IGHA2,IGHG2,WARS1,IGLC2,ICAM1,MYOF,VAMP5,LAP3,LGALS3BP,IGKV3-20,IGHG1,IGKV3-11,GAS6,PLSCR1,IGKV1-39,SECTM1,GBA1,LTA4H,H2BC5,GM2A,NECTIN2,GNS,IGLC3,PADI2,SLC2A3,GALM,H2BC6,DYSF,HLA-E,TPP1,GK,RALB,CDK5RAP2,S100A9,TNFSF10,HLA-DRA,H2BC21,HP	T0_V_T2_down
query_1	0.000980303	267	150	12	0.08	0.0449438	REAC:R-HSA-983168	REAC	Antigen processing: Ubiquitination & Proteasome degradation	FBXO6,UBE2L6,TRIM21,PSMB9,PSME2,PSMB8,SOCS1,DTX3L,SOCS3,RNF213,TRIM69,PSME1	T0_V_T4_down
query_1	0.000981097	661	122	19	0.155738	0.0287443	GO:0098657	GO:BP	import into cell	FCGR1A,CEACAM1,SCARF1,LIMK1,CACNA1E,ADM,SORT1,SLC6A12,CD177,IL15RA,RAB20,NOD2,KCNJ2,ATG3,KCNJ15,FCER1G,ANXA3,CLU,DYSF	T0_V_T3_down
query_1	0.000982164	170	214	12	0.0560748	0.0705882	GO:0071356	GO:BP	cellular response to tumor necrosis factor	GBP1,GBP2,AIM2,STAT1,GBP3,CASP1,CARD16,CASP4,FAS,GAS6,GBA1,MAPK14	T0_V_T4_down
query_1	0.000982164	19	161	4	0.0248447	0.210526	GO:2001185	GO:BP	regulation of CD8-positive, alpha-beta T cell activation	CD274,IRF1,SOCS1,HLA-E	T0_V_T4_down
query_1	0.000990193	12	231	4	0.017316	0.333333	GO:0071639	GO:BP	positive regulation of monocyte chemotactic protein-1 production	IL1B,OAS1,NOD2,OAS3	T0_V_T2_down
query_1	0.000990658	211	37	6	0.162162	0.028436	GO:0007162	GO:BP	negative regulation of cell adhesion	CD274,PDCD1LG2,GBP1,CEACAM1,DUSP3,IRF1	T0_V_T3_down
query_1	0.000996163	102	285	10	0.0350877	0.0980392	GO:0035710	GO:BP	CD4-positive, alpha-beta T cell activation	CD274,IL27,SOCS3,BCL6,BCL3,SOCS1,STAT3,SEMA4A,RSAD2,JAK3	T0_V_T3_down
query_1	0.0010009	443	291	24	0.0824742	0.0541761	GO:0030162	GO:BP	regulation of proteolysis	AIM2,PLAUR,PML,IL1B,PSMB9,CARD16,PSME2,CASP1,CLU,TNFSF10,PSMB8,FAS,GAS6,NLRC4,GBA1,DESI1,PSME1,S100A9,BAK1,NUB1,STAT3,GRN,IFI16,S100A8	T0_V_T3_down
query_1	0.0010075	16	8	2	0.25	0.125	GO:0032693	GO:BP	negative regulation of interleukin-10 production	CD274,PDCD1LG2	T0_V_T3_down
query_1	0.00101221	252	117	11	0.0940171	0.0436508	GO:0002237	GO:BP	response to molecule of bacterial origin	CD274,GBP5,PDCD1LG2,GBP2,ADM,NOD2,IL1B,CARD16,GBP3,TLR5,CASP1	T0_V_T3_down
query_1	0.00101623	320	276	19	0.0688406	0.059375	GO:0007159	GO:BP	leukocyte cell-cell adhesion	CD274,PDCD1LG2,DUSP3,IRF1,ICAM1,SMARCD3,CD177,IL1B,NOD2,SOCS1,SELL,HLA-E,CCR2,BCL6,FGL2,S100A9,CD300A,IL12RB1,JAK3	T0_V_T4_down
query_1	0.00102362	150	276	12	0.0434783	0.08	GO:0046631	GO:BP	alpha-beta T cell activation	CD274,IRF1,IL27,SOCS1,SOCS3,HLA-E,CCR2,RSAD2,BCL6,CD300A,IL12RB1,JAK3	T0_V_T4_down
query_1	0.00104322	348	285	21	0.0736842	0.0603448	GO:0002443	GO:BP	leukocyte mediated immunity	FCGR1A,SERPING1,C1QC,CEACAM1,ICAM1,CD177,NOD2,IL1B,NECTIN2,FCER1G,ANXA3,CLU,BCL6,NBN,IGHA1,BCL3,CD300A,HLA-E,PRKCD,RSAD2,JAK3	T0_V_T3_down
query_1	0.00104322	296	291	19	0.0652921	0.0641892	GO:2001233	GO:BP	regulation of apoptotic signaling pathway	SEPTIN4,ICAM1,ATF3,PLAUR,PML,IL1B,CLU,TNFSF10,FAS,G0S2,RBCK1,LTBR,SOD2,S100A9,GRINA,BAK1,PRKCD,ITPRIP,S100A8	T0_V_T3_down
query_1	0.00107079	327	291	20	0.0687285	0.0611621	GO:1903706	GO:BP	regulation of hemopoiesis	C1QC,IRF1,CEACAM1,SMARCD3,STAT1,IL27,SLAMF8,TNFAIP6,IL15RA,FANCA,SOCS1,GAS6,CCR2,MAPK14,BCL6,FGL2,IL12RB1,TMEM176B,JAK3,LILRB3	T0_V_T4_down
query_1	0.00107079	94	276	10	0.0362319	0.106383	GO:0050868	GO:BP	negative regulation of T cell activation	CD274,PDCD1LG2,DUSP3,IRF1,SOCS1,HLA-E,BCL6,FGL2,CD300A,JAK3	T0_V_T4_down
query_1	0.00107079	73	114	6	0.0526316	0.0821918	GO:0032651	GO:BP	regulation of interleukin-1 beta production	GBP5,AIM2,PML,CASP1,CARD16,NOD2	T0_V_T4_down
query_1	0.00107079	73	114	6	0.0526316	0.0821918	GO:0032611	GO:BP	interleukin-1 beta production	GBP5,AIM2,PML,CASP1,CARD16,NOD2	T0_V_T4_down
query_1	0.00108594	759	269	34	0.126394	0.0447958	GO:0099503	GO:CC	secretory vesicle	SEPTIN4,CD177,SERPING1,LHFPL2,GPR84,CEACAM1,ANXA3,TNFAIP6,MCEMP1,MYOF,IL1B,STX11,LGALS3BP,HPSE,SELL,GAS6,GYG1,SIGLEC14,LTA4H,FCER1G,FCAR,GM2A,GNS,CLEC4D,PADI2,SLC2A3,PLAUR,DYSF,MAPK14,FCGR2A,S100A9,HP,FPR2,VAMP3	T0_V_T2_down
query_1	0.00109155	393	291	22	0.0756014	0.0559796	GO:1903131	GO:BP	mononuclear cell differentiation	BATF2,SOCS3,SMARCD3,IL27,SLAMF8,IL1B,IRF1,GAS6,GBA1,IL15RA,FCER1G,CCR2,CLEC4D,TMEM176B,SOCS1,BAK1,RSAD2,HLA-DRA,BCL6,LTBR,LILRB4,IFI16	T0_V_T2_down
query_1	0.00111925	290	92	10	0.108696	0.0344828	GO:0002697	GO:BP	regulation of immune effector process	FCGR1A,SERPING1,CEACAM1,ICAM1,IL27,CD177,NOD2,IL1B,SLAMF8,NECTIN2	T0_V_T3_down
query_1	0.00115544	227	228	14	0.0614035	0.061674	GO:0001818	GO:BP	negative regulation of cytokine production	CD274,PDCD1LG2,GBP1,CEACAM1,NOD2,PML,CARD16,GAS6,BCL6,GBA1,NMI,ELF4,XAF1,BCL3	T0_V_T3_down
query_1	0.0011558	651	269	30	0.111524	0.0460829	GO:0030141	GO:CC	secretory granule	CD177,SERPING1,LHFPL2,GPR84,CEACAM1,ANXA3,TNFAIP6,MCEMP1,IL1B,LGALS3BP,HPSE,SELL,GAS6,GYG1,SIGLEC14,LTA4H,FCER1G,FCAR,GM2A,GNS,CLEC4D,PADI2,SLC2A3,PLAUR,MAPK14,FCGR2A,S100A9,HP,FPR2,VAMP3	T0_V_T2_down
query_1	0.00117506	74	291	9	0.0309278	0.121622	GO:0048525	GO:BP	negative regulation of viral process	PLSCR1,TRIM21,STAT1,IFITM3,OAS1,OAS3,RSAD2,ZFP36,IFI16	T0_V_T2_down
query_1	0.00117506	227	287	16	0.0557491	0.0704846	GO:0001818	GO:BP	negative regulation of cytokine production	CD274,PDCD1LG2,GBP1,CEACAM1,VSIG4,GAS6,GBA1,CARD16,PML,OAS1,NOD2,OAS3,BCL6,ZFP36,LILRB4,XAF1	T0_V_T2_down
query_1	0.00118864	16	9	2	0.222222	0.125	GO:0032693	GO:BP	negative regulation of interleukin-10 production	CD274,PDCD1LG2	T0_V_T4_down
query_1	0.00119309	42	13	3	0.230769	0.0714286	KEGG:04610	KEGG	Complement and coagulation cascades	C1QB,SERPING1,C1QC	T0_V_T3_down
query_1	0.00119309	173	289	13	0.0449827	0.0751445	KEGG:05169	KEGG	Epstein-Barr virus infection	ICAM1,TAP1,STAT1,GADD45B,FAS,BAK1,GADD45G,STAT3,STAT2,MAPK14,HLA-E,JAK3,TAPBP	T0_V_T3_down
query_1	0.00121341	191	267	14	0.0524345	0.0732984	GO:0002699	GO:BP	positive regulation of immune effector process	FCGR1A,CD177,IL1B,NOD2,NECTIN2,HLA-E,CCR2,RSAD2,FFAR2,FFAR3,HLA-C,MR1,CD300A,IL12RB1	T0_V_T4_down
query_1	0.00121342	252	292	18	0.0616438	0.0714286	GO:0002237	GO:BP	response to molecule of bacterial origin	CD274,GBP5,PDCD1LG2,GBP2,GBP3,ADM,CASP1,CARD16,IL1B,NOD2,TLR5,GCH1,SOD2,MAPK14,SBNO2,S100A9,LOXL1,MAOB	T0_V_T4_down
query_1	0.00122597	29	35	3	0.0857143	0.103448	GO:0050858	GO:BP	negative regulation of antigen receptor-mediated signaling pathway	GBP1,CEACAM1,DUSP3	T0_V_T3_down
query_1	0.00123837	31	16	3	0.1875	0.0967742	WP:WP558	WP	Complement and coagulation cascades	SERPING1,C1QB,C1QC	T0_V_T4_down
query_1	0.00123837	72	181	8	0.0441989	0.111111	WP:WP5090	WP	Complement system in neuronal development and plasticity	SERPING1,C1QB,C1QC,CLU,FAS,GAS6,PLSCR1,BAK1	T0_V_T4_down
query_1	0.00125368	29	36	3	0.0833333	0.103448	GO:0050858	GO:BP	negative regulation of antigen receptor-mediated signaling pathway	GBP1,DUSP3,CEACAM1	T0_V_T4_down
query_1	0.00125817	144	36	5	0.138889	0.0347222	GO:0022408	GO:BP	negative regulation of cell-cell adhesion	CD274,PDCD1LG2,DUSP3,IRF1,CEACAM1	T0_V_T4_down
query_1	0.00126179	243	277	17	0.0613718	0.0699588	GO:0032496	GO:BP	response to lipopolysaccharide	CD274,PDCD1LG2,GBP5,ADM,TLR5,GBP3,IL1B,GCH1,GBP2,CARD16,FCAR,SBNO2,CASP1,MAPK14,NOD2,S100A9,ZFP36	T0_V_T2_down
query_1	0.00126238	2168	292	79	0.270548	0.0364391	GO:0009966	GO:BP	regulation of signal transduction	GBP5,SEPTIN4,AIM2,GBP1,KREMEN1,GBP2,CEACAM1,ICAM1,DUSP3,IRF1,SECTM1,TIFA,ATF3,TRIM21,ADM,STAT1,PLAUR,RHBDF2,CD177,GADD45B,NOD2,PML,PARP9,SOCS3,IL1B,CARD16,NECTIN2,TRIM22,FANCA,TNFAIP6,CASP4,CASP1,CLU,TNFSF10,PADI2,PARP14,HPSE,PIK3AP1,TGM2,FAS,GAS6,RNF213,MARCO,OSM,G0S2,BCL6,GBA1,PLSCR1,ACTA2,LY96,RBCK1,RALB,NMI,IFI35,PLEK,LTBR,BCL3,ZBP1,SOD2,S100A9,SOCS1,GRINA,DYNLT1,BAK1,ALPK1,GADD45G,INSL3,STAT…	T0_V_T3_down
query_1	0.00126417	489	7	4	0.571429	0.00817996	GO:0098552	GO:CC	side of membrane	CD274,PDCD1LG2,CD177,NRN1	T0_V_T2_down
query_1	0.00127477	177	276	13	0.0471014	0.0734463	GO:0045619	GO:BP	regulation of lymphocyte differentiation	IRF1,SMARCD3,IL27,SLAMF8,IL15RA,FANCA,SOCS1,GAS6,CCR2,BCL6,FGL2,IL12RB1,JAK3	T0_V_T4_down
query_1	0.00127477	443	276	23	0.0833333	0.0519187	GO:0002694	GO:BP	regulation of leukocyte activation	CD274,PDCD1LG2,DUSP3,IRF1,SMARCD3,IL27,SLAMF8,IL15RA,FANCA,IL1B,NOD2,SOCS1,NECTIN2,GAS6,HLA-E,CCR2,PLSCR1,CLEC4D,BCL6,FGL2,CD300A,IL12RB1,JAK3	T0_V_T4_down
query_1	0.00127477	88	154	7	0.0454545	0.0795455	GO:0033209	GO:BP	tumor necrosis factor-mediated signaling pathway	AIM2,STAT1,CASP1,CARD16,CASP4,FAS,GAS6	T0_V_T4_down
query_1	0.00129322	19	45	3	0.0666667	0.157895	GO:0035458	GO:BP	cellular response to interferon-beta	AIM2,IRF1,STAT1	T0_V_T4_down
query_1	0.00129712	1876	269	63	0.234201	0.0335821	GO:0031410	GO:CC	cytoplasmic vesicle	SEPTIN4,CD274,CD177,SERPING1,GBP6,SCARF1,FCGR1A,GBP5,GBP1,LHFPL2,GPR84,CEACAM1,ANXA3,TAP1,GBP3,TNFAIP6,MCEMP1,MYOF,IL1B,STX11,VAMP5,LGALS3BP,GCH1,HPSE,SELL,GBP4,GAS6,GYG1,RAB20,GBP2,VPS9D1,SIGLEC14,IL15RA,LTA4H,FCER1G,TAPBP,HLA-DPA1,FCAR,TRIM21,MARCO,PML,GM2A,SORT1,IFITM3,GNS,CLEC4D,PADI2,SLC2A3,PLAUR,DYSF,MAPK14,NOD2,HLA-E,TPP1,SAMD9L,SOCS1,FCGR2A,AP5B1,S100A9,HLA-DRA,HP,FPR2,VAMP3	T0_V_T2_down
query_1	0.00131541	1235	292	53	0.181507	0.042915	GO:0010647	GO:BP	positive regulation of cell communication	GBP5,SEPTIN4,GBP2,ICAM1,SECTM1,TIFA,ATF3,TRIM21,PLAUR,GADD45B,NOD2,PML,PARP9,IL1B,CARD16,NECTIN2,TRIM22,CASP4,CASP1,TNFSF10,PARP14,HPSE,PIK3AP1,TGM2,FFAR2,FAS,GAS6,MARCO,HCAR2,OSM,G0S2,GBA1,ACTA2,LY96,RBCK1,RALB,NMI,IFI35,LTBR,ZBP1,S100A9,BAK1,ALPK1,GADD45G,INSL3,STAT3,CD300A,PRKCD,RSAD2,TRIM38,APOL3,S100A8,CLEC4D	T0_V_T3_down
query_1	0.00131946	53	249	7	0.0281124	0.132075	GO:0060760	GO:BP	positive regulation of response to cytokine stimulus	PARP9,CASP1,PARP14,CASP4,GAS6,IFIH1,ZBP1	T0_V_T4_down
query_1	0.00131946	72	266	9	0.0338346	0.125	GO:0002526	GO:BP	acute inflammatory response	FCGR1A,APOL2,IL1B,HLA-E,PLSCR1,FFAR2,FFAR3,OSM,HP	T0_V_T4_down
query_1	0.00132649	1241	292	53	0.181507	0.0427075	GO:0023056	GO:BP	positive regulation of signaling	GBP5,SEPTIN4,GBP2,ICAM1,SECTM1,TIFA,ATF3,TRIM21,PLAUR,GADD45B,NOD2,PML,PARP9,IL1B,CARD16,NECTIN2,TRIM22,CASP4,CASP1,TNFSF10,PARP14,HPSE,PIK3AP1,TGM2,FFAR2,FAS,GAS6,MARCO,HCAR2,OSM,G0S2,VAMP3,ACTA2,LY96,RBCK1,RALB,NMI,IFI35,LTBR,ZBP1,S100A9,BAK1,ALPK1,GADD45G,INSL3,STAT3,CD300A,PRKCD,RSAD2,TRIM38,APOL3,S100A8,CLEC4D	T0_V_T3_down
query_1	0.00132908	27	239	6	0.0251046	0.222222	GO:0038187	GO:MF	pattern recognition receptor activity	AIM2,NOD2,MARCO,TLR5,CLEC4D,IFIH1	T0_V_T4_down
query_1	0.00132908	540	162	21	0.12963	0.0388889	GO:0042803	GO:MF	protein homodimerization activity	GBP5,GBP1,GBP2,GBP4,CEACAM1,TAP1,STAT1,WARS1,ATF3,TRIM21,TRIM22,GBP3,PML,TIMM10,NECTIN2,TYMP,FCER1G,PADI2,CALCOCO2,GCH1,GYG1	T0_V_T4_down
query_1	0.00132908	12	139	4	0.028777	0.333333	GO:0050700	GO:MF	CARD domain binding	CASP1,CARD16,NOD2,CASP4	T0_V_T4_down
query_1	0.00132908	1614	202	49	0.242574	0.0303594	GO:0042802	GO:MF	identical protein binding	GBP5,SEPTIN4,C1QB,GBP1,GBP2,AIM2,GBP4,SDC3,CEACAM1,TAP1,STAT1,VPS9D1,WARS1,ATF3,SLAMF8,TRIM21,TRIM22,GBP3,PML,PSME2,GRIN3A,KCNJ2,IFIT3,TIMM10,CASP1,CARD16,NECTIN2,TNFSF10,TYMP,FCER1G,PIK3AP1,FAS,PADI2,TRIM69,CALCOCO2,ITGA2B,GCH1,GYG1,CCR2,SDC1,KCNMA1,BAK1,IFI35,SLAMF7,DESI1,CLEC2B,STAT2,SOD2,NMI	T0_V_T4_down
query_1	0.0013316	106	282	10	0.035461	0.0943396	GO:0002456	GO:BP	T cell mediated immunity	CEACAM1,ICAM1,IL1B,NECTIN2,CCR2,NOD2,HLA-E,RSAD2,HLA-DRA,LILRB4	T0_V_T2_down
query_1	0.00133608	1880	269	63	0.234201	0.0335106	GO:0097708	GO:CC	intracellular vesicle	SEPTIN4,CD274,CD177,SERPING1,GBP6,SCARF1,FCGR1A,GBP5,GBP1,LHFPL2,GPR84,CEACAM1,ANXA3,TAP1,GBP3,TNFAIP6,MCEMP1,MYOF,IL1B,STX11,VAMP5,LGALS3BP,GCH1,HPSE,SELL,GBP4,GAS6,GYG1,RAB20,GBP2,VPS9D1,SIGLEC14,IL15RA,LTA4H,FCER1G,TAPBP,HLA-DPA1,FCAR,TRIM21,MARCO,PML,GM2A,SORT1,IFITM3,GNS,CLEC4D,PADI2,SLC2A3,PLAUR,DYSF,MAPK14,NOD2,HLA-E,TPP1,SAMD9L,SOCS1,FCGR2A,AP5B1,S100A9,HLA-DRA,HP,FPR2,VAMP3	T0_V_T2_down
query_1	0.00133833	103	217	10	0.0460829	0.0970874	KEGG:04514	KEGG	Cell adhesion molecules	CD274,PDCD1LG2,SDC3,ICAM1,NECTIN2,SELL,HLA-E,SDC1,HLA-C,LRRC4	T0_V_T4_down
query_1	0.00134935	753	115	20	0.173913	0.0265604	GO:0051241	GO:BP	negative regulation of multicellular organismal process	CD274,SERPING1,PDCD1LG2,GBP1,C1QC,KREMEN1,DUSP3,IRF1,CEACAM1,STAT1,SLAMF8,PML,TNFAIP6,ADM,PLAUR,FGF13,CARD16,IL1B,NOD2,SOCS1	T0_V_T4_down
query_1	0.0013598	227	131	10	0.0763359	0.0440529	GO:0043122	GO:BP	regulation of canonical NF-kappaB signal transduction	TIFA,STAT1,SECTM1,TRIM21,TRIM22,CASP1,CARD16,IL1B,NOD2,TNFSF10	T0_V_T4_down
query_1	0.0013598	177	271	13	0.0479705	0.0734463	GO:0052548	GO:BP	regulation of endopeptidase activity	AIM2,PSMB9,PLAUR,PSMB8,CASP1,CARD16,TNFSF10,FAS,GAS6,BAK1,NLRC4,S100A9,IFI16	T0_V_T4_down
query_1	0.00135988	292	265	18	0.0679245	0.0616438	GO:0050900	GO:BP	leukocyte migration	ICAM1,SLAMF8,CD177,TNFAIP6,IL1B,NOD2,SELL,FCER1G,PADI2,GAS6,ITGA2B,CCR2,FFAR2,ITGA7,GBA1,CXCL16,S100A9,CD300A	T0_V_T4_down
query_1	0.00138418	122	291	11	0.0378007	0.0901639	GO:0010952	GO:BP	positive regulation of peptidase activity	AIM2,CASP1,TNFSF10,FAS,NLRC4,S100A9,BAK1,STAT3,GRN,IFI16,S100A8	T0_V_T3_down
query_1	0.00138418	9	13	2	0.153846	0.222222	GO:0098883	GO:BP	synapse pruning	C1QB,C1QC	T0_V_T3_down
query_1	0.00138418	105	285	10	0.0350877	0.0952381	GO:0046632	GO:BP	alpha-beta T cell differentiation	IRF1,IL27,SOCS3,BCL6,BCL3,SOCS1,STAT3,SEMA4A,RSAD2,JAK3	T0_V_T3_down
query_1	0.00138418	479	291	25	0.0859107	0.0521921	GO:0097190	GO:BP	apoptotic signaling pathway	SEPTIN4,ICAM1,ATF3,POLB,PLAUR,SORT1,PML,IL1B,CASP4,CLU,TNFSF10,FAS,G0S2,NBN,RBCK1,LTBR,BCL3,SOD2,S100A9,GRINA,BAK1,PRKCD,ITPRIP,IFI16,S100A8	T0_V_T3_down
query_1	0.00140893	6	226	3	0.0132743	0.5	GO:0002445	GO:BP	type II hypersensitivity	FCGR1A,IGHG1,HLA-E	T0_V_T2_down
query_1	0.00140893	6	226	3	0.0132743	0.5	GO:0001794	GO:BP	type IIa hypersensitivity	FCGR1A,IGHG1,HLA-E	T0_V_T2_down
query_1	0.00140931	304	91	10	0.10989	0.0328947	GO:0043086	GO:BP	negative regulation of catalytic activity	CEACAM1,LIMK1,DUSP3,WARS1,PLAUR,SORT1,PML,PARP9,IL1B,CARD16	T0_V_T3_down
query_1	0.00144754	320	282	19	0.0673759	0.059375	GO:0007159	GO:BP	leukocyte cell-cell adhesion	CD274,PDCD1LG2,CD177,DUSP3,SMARCD3,ICAM1,IL1B,IRF1,VSIG4,SELL,HLA-DPA1,CCR2,NOD2,HLA-E,SOCS1,S100A9,HLA-DRA,BCL6,LILRB4	T0_V_T2_down
query_1	0.00145721	144	37	5	0.135135	0.0347222	GO:0022408	GO:BP	negative regulation of cell-cell adhesion	CD274,PDCD1LG2,CEACAM1,DUSP3,IRF1	T0_V_T3_down
query_1	0.00145792	72	268	9	0.0335821	0.125	GO:0002526	GO:BP	acute inflammatory response	FCGR1A,APOL2,IL1B,FFAR2,OSM,HP,PLSCR1,SERPINA1,HLA-E	T0_V_T3_down
query_1	0.00149327	26	133	4	0.0300752	0.153846	GO:0060333	GO:BP	type II interferon-mediated signaling pathway	IRF1,STAT1,PARP9,PARP14	T0_V_T3_down
query_1	0.00149846	1988	294	72	0.244898	0.0362173	GO:0035556	GO:BP	intracellular signal transduction	SEPTIN4,AIM2,GBP1,CEACAM1,ICAM1,LIMK1,FBXO6,DUSP3,SECTM1,TIFA,ATF3,TRIM21,POLB,ADM,STAT1,PLAUR,GADD45B,NOD2,PML,PARP9,FGF13,SOCS3,IL1B,CARD16,TRIM22,WSB2,CASP4,CASP1,CLU,TNFSF10,HPSE,PIK3AP1,DTX3L,TGM2,FAS,GAS6,NUCB1,MARCO,TREML1,OSM,BCL6,GBA1,ACTA2,NBN,RBCK1,RALB,NMI,IFI35,SAMD14,CCRL2,PLEK,LTBR,BCL3,SOD2,S100A9,SOCS1,GRINA,BAK1,ALPK1,GADD45G,INSL3,STAT3,CD300A,MAPK14,PRKCD,TRIM38,IFI16,JAK3,APO…	T0_V_T3_down
query_1	0.00150377	5	154	3	0.0194805	0.6	GO:0019062	GO:BP	virion attachment to host cell	ICAM1,NECTIN2,GAS6	T0_V_T4_down
query_1	0.00150582	69	212	7	0.0330189	0.101449	GO:0030670	GO:CC	phagocytic vesicle membrane	TAP1,RAB20,ANXA3,HLA-E,VAMP3,TAPBP,HLA-C	T0_V_T4_down
query_1	0.00151388	52	228	6	0.0263158	0.115385	REAC:R-HSA-168643	REAC	Nucleotide-binding domain, leucine rich repeat containing receptor (NLR) signaling pathways	AIM2,CASP1,NLRC4,MAPK14,NOD2,CASP4	T0_V_T2_down
query_1	0.00151588	41	226	6	0.0265487	0.146341	GO:2001238	GO:BP	positive regulation of extrinsic apoptotic signaling pathway	ATF3,PML,TNFSF10,G0S2,RBCK1,LTBR	T0_V_T3_down
query_1	0.00151588	88	159	7	0.0440252	0.0795455	GO:0033209	GO:BP	tumor necrosis factor-mediated signaling pathway	AIM2,STAT1,CARD16,CASP4,CASP1,FAS,GAS6	T0_V_T3_down
query_1	0.00151588	20	268	5	0.0186567	0.25	GO:0002675	GO:BP	positive regulation of acute inflammatory response	FCGR1A,IL1B,FFAR2,OSM,HLA-E	T0_V_T3_down
query_1	0.00151588	1	1	1	1	1	GO:0002843	GO:BP	regulation of tolerance induction to tumor cell	CD274	T0_V_T3_down
query_1	0.00151588	1	1	1	1	1	GO:0002845	GO:BP	positive regulation of tolerance induction to tumor cell	CD274	T0_V_T3_down
query_1	0.00151588	1	1	1	1	1	GO:1905404	GO:BP	positive regulation of activated CD8-positive, alpha-beta T cell apoptotic process	CD274	T0_V_T3_down
query_1	0.00151588	170	159	10	0.0628931	0.0588235	GO:0071356	GO:BP	cellular response to tumor necrosis factor	AIM2,GBP1,GBP2,STAT1,CARD16,GBP3,CASP4,CASP1,FAS,GAS6	T0_V_T3_down
query_1	0.00151588	1	1	1	1	1	GO:0002413	GO:BP	tolerance induction to tumor cell	CD274	T0_V_T3_down
query_1	0.00154367	3	119	2	0.0168067	0.666667	GO:0071756	GO:CC	pentameric IgM immunoglobulin complex	JCHAIN,IGKV3-20	T0_V_T2_down
query_1	0.00154367	159	220	10	0.0454545	0.0628931	GO:0101002	GO:CC	ficolin-1-rich granule	TNFAIP6,GYG1,SIGLEC14,LTA4H,FCER1G,FCAR,GNS,CLEC4D,SLC2A3,MAPK14	T0_V_T2_down
query_1	0.00154367	136	227	10	0.0440529	0.0735294	GO:0005775	GO:CC	vacuolar lumen	SDC3,SDC1,TCN2,HPSE,GYG1,GBA1,GM2A,GNS,PADI2,TPP1	T0_V_T2_down
query_1	0.00154367	3	119	2	0.0168067	0.666667	GO:0071754	GO:CC	IgM immunoglobulin complex, circulating	JCHAIN,IGKV3-20	T0_V_T2_down
query_1	0.00155368	39	280	6	0.0214286	0.153846	GO:0042119	GO:BP	neutrophil activation	CD177,FCER1G,ANXA3,CD300A,PRKCD,GRN	T0_V_T3_down
query_1	0.00156158	8	114	3	0.0263158	0.375	GO:0032661	GO:BP	regulation of interleukin-18 production	GBP5,CASP1,NOD2	T0_V_T4_down
query_1	0.00156158	8	114	3	0.0263158	0.375	GO:0032621	GO:BP	interleukin-18 production	GBP5,CASP1,NOD2	T0_V_T4_down
query_1	0.00156276	99	2	2	1	0.020202	KEGG:04936	KEGG	Alcoholic liver disease	C1QB,C1QC	T0_V_T2_down
query_1	0.00156284	58	250	7	0.028	0.12069	GO:0050688	GO:BP	regulation of defense response to virus	AIM2,IL27,TRIM22,IL1B,PML,STAT1,PARP9	T0_V_T2_down
query_1	0.00156284	294	282	18	0.0638298	0.0612245	GO:0050867	GO:BP	positive regulation of cell activation	CD274,PDCD1LG2,SMARCD3,IL1B,GAS6,IL15RA,HLA-DPA1,NECTIN2,CCR2,CLEC4D,NOD2,HLA-E,SOCS1,PLEK,HLA-DRA,BCL6,CD38,LILRB4	T0_V_T2_down
query_1	0.00156615	50	284	7	0.0246479	0.14	GO:0032731	GO:BP	positive regulation of interleukin-1 beta production	GBP5,AIM2,NOD2,CASP1,NLRC4,STAT3,IFI16	T0_V_T3_down
query_1	0.00156891	6361	212	149	0.70283	0.023424	GO:0016020	GO:CC	membrane	C1QB,SEPTIN4,CD274,PDCD1LG2,CD177,NRN1,IGHV3-7,SCARF1,FCGR1A,IGHV4-39,GBP5,SDC3,GBP1,IGLV1-40,IGHV3-21,IGLV6-57,IGKV1-5,DUSP3,LIMK1,IGKV2-30,PSTPIP2,SOCS3,LHFPL2,IGHA1,GPR84,LMNB1,IGHV3-15,IGLV3-1,KREMEN1,IGLV2-14,CEACAM1,CDCP1,IGHV6-1,IGKV3-15,IGLV1-47,IGKV4-1,IGLV3-19,SLC26A8,IGHV3-33,IGLV2-8,IGKV1-16,IGHV3-23,SDC1,IGLV3-21,IGHV4-59,IGLV1-44,IGKV2D-29,SLAMF8,ANXA3,IGHA2,TAP1,TLR5,IGHV1-18,IGHV4…	T0_V_T2_down
query_1	0.00157824	22	214	5	0.0233645	0.227273	GO:0032692	GO:BP	negative regulation of interleukin-1 production	CEACAM1,PML,CARD16,GAS6,ELF4	T0_V_T3_down
query_1	0.00157824	7	26	2	0.0769231	0.285714	GO:0030853	GO:BP	negative regulation of granulocyte differentiation	C1QC,CEACAM1	T0_V_T3_down
query_1	0.00159242	22	48	3	0.0625	0.136364	GO:0050860	GO:BP	negative regulation of T cell receptor signaling pathway	GBP1,DUSP3,CEACAM1	T0_V_T2_down
query_1	0.0016182	930	122	22	0.180328	0.0236559	GO:0030659	GO:CC	cytoplasmic vesicle membrane	CD274,FCGR1A,GBP5,GBP1,GBP2,CEACAM1,LHFPL2,SCARF1,TAP1,PLAUR,VAMP5,SORT1,CD177,IL15RA,RAB20,PML,IFITM3,GPR84,SELL,FCER1G,ANXA3,DYSF	T0_V_T3_down
query_1	0.00162334	5	159	3	0.0188679	0.6	GO:0019062	GO:BP	virion attachment to host cell	ICAM1,NECTIN2,GAS6	T0_V_T3_down
query_1	0.00164201	353	292	20	0.0684932	0.0566572	GO:0030098	GO:BP	lymphocyte differentiation	IRF1,SMARCD3,IL27,IL15RA,SOCS3,IL1B,SLAMF8,FANCA,FCER1G,GAS6,BCL6,GBA1,BCL3,SOCS1,BAK1,STAT3,SEMA4A,RSAD2,JAK3,CLEC4D	T0_V_T3_down
query_1	0.00164201	8	117	3	0.025641	0.375	GO:0032661	GO:BP	regulation of interleukin-18 production	GBP5,NOD2,CASP1	T0_V_T3_down
query_1	0.00164201	46	63	4	0.0634921	0.0869565	GO:0042058	GO:BP	regulation of epidermal growth factor receptor signaling pathway	CEACAM1,DUSP3,PLAUR,RHBDF2	T0_V_T3_down
query_1	0.00164201	8	117	3	0.025641	0.375	GO:0032621	GO:BP	interleukin-18 production	GBP5,NOD2,CASP1	T0_V_T3_down
[truncated: 2,388 more rows]

## Sheet: TableS8
Table S8: Covariates used in cis-eQTL analsis in T0 individuals
[truncated: 12 more rows]

## Sheet: TableS9
Table S9: Covariates used in cis-eQTL analsis in T1 individuals
[truncated: 14 more rows]

[truncated: 3 more sheets: TableS10, TableS11, TableS12]
