# Supplementary material for: Genetic control of the transcriptional response to active tuberculosis disease and treatment
Source: Research Square preprint supplement (doi:10.21203/rs.3.rs-7311967/v1), 2025-08-29
Supplement: Supplementary file 4 [file 6a946124533cd094f32f65ef.xlsx]

## Sheet: Contents
Genetic control of the transcriptional response to active tuberculosis disease and treatment
John F. O'Grady, Alexander S. Leonard, Houcheng Li, Lingzhao Fang, Hubert Pausch, Isobel C. Gormley, Stephen V. Gordon, David E. MacHugh*
* Corresponding author: David E. MacHugh
Corresponding author email address:			david.machugh@ucd.ie
Supplementary data
Worksheet 18		Significant mashR (LFSR < 0.05) results (standard cis-eQTL mapping), related to Figure 4 and S9
Worksheet 19		response cis-eGenes T0 V T1, related to Figure 4 and S9
Worksheet 20		response cis-eGenes T0 V T2, related to Figure 4 and S9
Worksheet 21		response cis-eGenes T0 V T3,related to Figure 4 and S9
Worksheet 22		response cis-eGenes T0 V T4, related to Figure 4 and S9
Worksheet 23		Enrichment analysis of response cis-eGenes, related to Figure 4
Worksheet 24		Karlsson et al., 2021 marker genes, related to Figure 5
Worksheet 25		Oelen et al., 2022 marker genes, related to Figure 5
Worksheet 26		Cell type cllustering and annotation, related to Figure 5
Worksheet 27		Signature matrix for deconvolution, related to Figure 5 and S10-13
Worksheet 28		Pseudobulk data for 100 samples, related to Figure S10-13
Worksheet 29		Deconvolution results of different tools on 100 psuedobulk samples, related to Figure S10-13
Worksheet 30		Cibersort deconvolution on real data, related to Figure 5
Worksheet 31		Anova test results for differences in cell type proportions, related to Figure 5
Worksheet 32		ieQTL results, related to Figure 6

## Sheet: Table S18
Table S18: mashr results across all groups (T0-T4) for variants that are significant (LFSR < 0.05) in at least one group
gene	gene_name	variant	T0_LFSR	T1_LFSR	T2_LFSR	T3_LFSR	T4_LFSR	variant_gene	T0_posterior_mean	T1_posterior_mean	T2_posterior_mean	T3_posterior_mean	T4_posterior_mean	T0_posterior_sd	T1_posterior_sd	T2_posterior_sd	T3_posterior_sd	T4_posterior_sd
ENSG00000268895.6	A1BG-AS1	19:58347700:A:G	1.41251e-05	2.10374e-05	1.81838e-05	1.41094e-05	8.95885e-09	19:58347700:A:G-ENSG00000268895.6	0.715706	0.7157	0.71571	0.715717	0.715799	0.220347	0.249935	0.215968	0.178941	0.161992
ENSG00000245105.4	A2M-AS1	12:9082621:T:C	0.0348022	0.609268	0.733671	0.681832	0.745802	12:9082621:T:C-ENSG00000245105.4	0.274418	0.0488875	0.0197887	0.034736	0.0145029	0.130873	0.173184	0.149879	0.177282	0.143379
ENSG00000184389.9	A3GALT2	1:33310172:G:A	2.79087e-18	2.369e-13	3.29895e-15	9.72058e-14	4.97262e-21	1:33310172:G:A-ENSG00000184389.9	0.860484	0.860484	0.860484	0.860484	0.860484	0.139	0.162903	0.135717	0.185614	0.109873
ENSG00000087884.16	AAMDC	11:77814208:A:AAAG	0.498034	0.0465407	0.541851	0.523698	0.483053	11:77814208:A:AAAG-ENSG00000087884.16	-0.0612091	-0.20093	-0.0551783	-0.0590717	-0.0640869	0.149181	0.105773	0.121024	0.158971	0.138656
ENSG00000090861.17	AARS1	16:70270868:A:ACTGGGC	0.151948	0.154419	0.152285	0.165764	0.00490499	16:70270868:A:ACTGGGC-ENSG00000090861.17	0.197366	0.195921	0.196246	0.192447	0.250588	0.188349	0.136394	0.115229	0.133499	0.108865
ENSG00000157426.14	AASDH	4:56348200:T:G	0.00161007	0.599452	0.57916	0.490378	0.497938	4:56348200:T:G-ENSG00000157426.14	0.537636	-0.0260038	-0.0339316	0.089519	-0.0835722	0.153849	0.201797	0.209951	0.277547	0.274549
ENSG00000215458.8	AATBC	21:43822234:T:C	0.0376767	0.0320084	0.0439555	0.0420662	0.0390482	21:43822234:T:C-ENSG00000215458.8	-0.198796	-0.200926	-0.198112	-0.198746	-0.199249	0.138315	0.156545	0.133808	0.14086	0.139615
ENSG00000181409.14	AATK	17:81164079:CCCAGCACCA:C	5.58534e-09	1.2722e-07	5.67337e-08	1.00853e-06	4.3738e-07	17:81164079:CCCAGCACCA:C-ENSG00000181409.14	0.526437	0.526409	0.526477	0.526453	0.526461	0.125689	0.145912	0.136518	0.146576	0.137305
ENSG00000183044.12	ABAT	16:8659322:A:G	3.46425e-06	7.76953e-06	2.71892e-06	3.96388e-06	3.36391e-06	16:8659322:A:G-ENSG00000183044.12	-0.646503	-0.646499	-0.646553	-0.646543	-0.646547	0.21626	0.251315	0.192869	0.206143	0.19941
ENSG00000165029.17	ABCA1	9:104903754:G:GC	0.0393409	0.0363952	0.038257	0.0431938	0.0394584	9:104903754:G:GC-ENSG00000165029.17	0.247468	0.248906	0.249134	0.246875	0.247874	0.196982	0.199936	0.157823	0.156008	0.196584
ENSG00000107331.18	ABCA2	9:137040455:G:A	7.75066e-05	0.000198131	5.00595e-05	2.43954e-05	1.74415e-05	9:137040455:G:A-ENSG00000107331.18	-0.454389	-0.454312	-0.454684	-0.454971	-0.454888	0.189747	0.194547	0.18646	0.141266	0.122935
ENSG00000064687.13	ABCA7	19:1038290:A:C	0	8.88178e-16	0	0	0	19:1038290:A:C-ENSG00000064687.13	-1.24797	-1.24797	-1.24797	-1.24797	-1.24797	0.172607	0.257845	0.17305	0.190229	0.150281
ENSG00000114770.17	ABCC5	3:183981728:T:C	7.31262e-06	4.40297e-06	5.26572e-06	0.000248763	3.56658e-08	3:183981728:T:C-ENSG00000114770.17	-0.447245	-0.447484	-0.447665	-0.447339	-0.448253	0.110022	0.122478	0.128418	0.157035	0.114863
ENSG00000117528.14	ABCD3	1:94464789:G:A	0.0372114	0.039041	0.0380913	0.044295	0.0219654	1:94464789:G:A-ENSG00000117528.14	-0.141474	-0.140929	-0.141647	-0.139783	-0.145382	0.114484	0.0990387	0.0790097	0.0985279	0.0936253
ENSG00000144827.9	ABHD10	3:111984144:G:A	0.00313256	0.00410252	0.00482215	0.00107309	0.0031133	3:111984144:G:A-ENSG00000144827.9	-0.423477	-0.422883	-0.422611	-0.425886	-0.423865	0.202276	0.217622	0.176416	0.154244	0.217596
ENSG00000106077.19	ABHD11	7:73690575:T:G	0.0752004	0.0489403	0.0691888	0.0774751	0.0709952	7:73690575:T:G-ENSG00000106077.19	0.265555	0.274696	0.270632	0.266075	0.267138	0.27801	0.149836	0.319211	0.2434	0.312736
ENSG00000168792.5	ABHD15	17:29568510:T:C	0.00211214	0.00234005	0.00205684	0.00220149	0.00182302	17:29568510:T:C-ENSG00000168792.5	-0.310032	-0.310056	-0.310968	-0.31067	-0.310976	0.120508	0.154957	0.159568	0.163163	0.140818
ENSG00000198658.4	ABHD17AP1	1:148147584:G:A	6.48367e-07	5.60874e-07	2.79843e-06	6.17151e-07	4.07029e-07	1:148147584:G:A-ENSG00000198658.4	0.65291	0.652923	0.652924	0.652947	0.652956	0.197004	0.207285	0.206771	0.184698	0.194237
ENSG00000263366.2	ABHD17AP5	22:22114567:C:T	0.0218595	0.0265365	0.0208005	0.0161166	0.018922	22:22114567:C:T-ENSG00000263366.2	0.446608	0.444623	0.446857	0.450006	0.447621	0.334382	0.309021	0.279512	0.234561	0.262909
ENSG00000226981.2	ABHD17AP6	17:20843746:G:A	3.56526e-07	3.97075e-07	5.22935e-07	3.84299e-07	5.58679e-07	17:20843746:G:A-ENSG00000226981.2	0.527885	0.527911	0.527945	0.528021	0.527984	0.151892	0.157986	0.143209	0.169468	0.157855
ENSG00000140526.18	ABHD2	15:89122592:G:T	0.00905925	0.00837079	0.0048906	0.00608696	0.00508881	15:89122592:G:T-ENSG00000140526.18	0.265706	0.266361	0.26845	0.267482	0.267979	0.161953	0.167844	0.112773	0.14104	0.131649
ENSG00000158201.10	ABHD3	18:21681903:C:T	0.0351454	0.0367776	0.0304992	0.0358581	0.0343868	18:21681903:C:T-ENSG00000158201.10	0.198403	0.198136	0.201091	0.198653	0.199046	0.138003	0.135172	0.133465	0.13977	0.152463
ENSG00000100439.11	ABHD4	14:22572756:A:G	0.80784	0.796054	0.719235	0.72743	0.0303997	14:22572756:A:G-ENSG00000100439.11	-0.010979	-0.00711622	0.0237818	0.026328	0.368385	0.218455	0.136327	0.11845	0.200163	0.141888
ENSG00000011198.10	ABHD5	3:43710351:C:A	0.014389	0.0137002	0.00948619	0.0127555	0.00755085	3:43710351:C:A-ENSG00000011198.10	0.279995	0.280518	0.282969	0.280798	0.282733	0.21625	0.203446	0.146993	0.168598	0.116938
ENSG00000108798.9	ABI3	17:49201127:G:C	0.00188314	1.18178e-05	0.000699457	0.0028905	1.66188e-05	17:49201127:G:C-ENSG00000108798.9	0.424918	0.429641	0.425755	0.424323	0.429422	0.174142	0.125774	0.138155	0.129156	0.121608
ENSG00000099204.22	ABLIM1	10:114801398:G:A	0.00902762	0.0185891	0.0285731	0.0264328	0.0266307	10:114801398:G:A-ENSG00000099204.22	0.218072	0.214947	0.213269	0.213862	0.213893	0.110435	0.108085	0.179705	0.12027	0.149999
ENSG00000173210.20	ABLIM3	5:149152420:T:A	0.00334329	0.0033255	0.0044783	0.0044933	0.0043669	5:149152420:T:A-ENSG00000173210.20	-0.29594	-0.29612	-0.29603	-0.296085	-0.296049	0.131995	0.125335	0.164655	0.171232	0.153916
ENSG00000175164.16	ABO	9:133255801:C:T	0.00111077	0.00113076	0.000961189	0.000853294	0.000747972	9:133255801:C:T-ENSG00000175164.16	0.503272	0.503324	0.503518	0.50372	0.503694	0.246773	0.254283	0.220436	0.221382	0.180838
ENSG00000146386.8	ABRACL	6:139028784:G:C	3.77312e-09	1.0581e-09	5.74632e-09	4.44932e-07	3.07636e-08	6:139028784:G:C-ENSG00000146386.8	-0.491883	-0.49187	-0.491977	-0.491943	-0.491953	0.153164	0.0934779	0.14521	0.151245	0.118007
ENSG00000114626.18	ABTB1	3:127682902:G:A	0.00293159	0.00597682	0.00670322	0.00477376	0.00841117	3:127682902:G:A-ENSG00000114626.18	-0.288789	-0.286595	-0.286521	-0.288469	-0.285739	0.1426	0.162065	0.153296	0.122662	0.130488
ENSG00000166016.6	ABTB2	11:34331679:T:C	0.0250437	0.027514	0.0304985	0.0291476	0.0290142	11:34331679:T:C-ENSG00000166016.6	0.392138	0.39149	0.391185	0.391623	0.391387	0.237321	0.251161	0.259594	0.350397	0.250379
ENSG00000151136.15	ABTB3	12:107343926:A:C	0.0536311	0.0500044	0.0489958	0.045084	0.0437798	12:107343926:A:C-ENSG00000151136.15	0.321854	0.323478	0.323409	0.324754	0.324389	0.294698	0.238795	0.229791	0.242545	0.238439
ENSG00000167315.18	ACAA2	18:49815229:T:A	0.0226775	0.0223691	0.0221308	0.0210752	0.0208859	18:49815229:T:A-ENSG00000167315.18	0.697325	0.697548	0.697617	0.697896	0.697707	0.631906	0.510244	0.675567	0.478757	0.436941
ENSG00000151498.12	ACAD8	11:134254720:T:C	3.08977e-06	3.45187e-06	1.7801e-06	4.54127e-05	5.87837e-09	11:134254720:T:C-ENSG00000151498.12	0.416871	0.41698	0.417036	0.417109	0.417685	0.126636	0.133448	0.0907049	0.160313	0.0917047
ENSG00000177646.20	ACAD9	3:128909658:G:C	2.78061e-19	5.66709e-15	1.64909e-16	4.88188e-15	3.69835e-16	3:128909658:G:C-ENSG00000177646.20	1.4185	1.4185	1.4185	1.4185	1.4185	0.228763	0.258853	0.242	0.2765	0.264612
ENSG00000196177.13	ACADSB	10:123054027:C:T	0.00999843	0.0589461	0.0452459	0.10399	0.151169	10:123054027:C:T-ENSG00000196177.13	0.254879	-0.276704	0.120321	0.0887712	-0.0664591	0.110533	0.122401	0.103862	0.123937	0.12951
ENSG00000072778.20	ACADVL	17:7219305:G:A	0.000307661	0.000708011	0.000616586	0.000508435	0.000640629	17:7219305:G:A-ENSG00000072778.20	-0.432519	-0.431913	-0.43219	-0.432562	-0.432368	0.192874	0.1587	0.156411	0.16076	0.240009
ENSG00000114331.16	ACAP2	3:195416487:C:T	0.000285532	0.000254176	0.000209989	0.000236759	0.000272102	3:195416487:C:T-ENSG00000114331.16	0.18349	0.18411	0.184671	0.18407	0.183892	0.0832293	0.0923326	0.0656838	0.0653993	0.0731774
ENSG00000075239.14	ACAT1	11:108121585:C:G	0.000311349	0.000273841	0.00028263	0.000211401	0.000281457	11:108121585:C:G-ENSG00000075239.14	0.468458	0.468592	0.46869	0.468911	0.46872	0.216593	0.189915	0.202638	0.151969	0.186875
ENSG00000110455.14	ACCS	11:44066439:G:T	1.4066e-15	6.20164e-16	7.53189e-16	8.65653e-15	1.70474e-14	11:44066439:G:T-ENSG00000110455.14	0.935623	0.935623	0.935623	0.935623	0.935623	0.172956	0.160527	0.160304	0.177623	0.164367
ENSG00000087085.16	ACHE	7:100884718:C:T	0.0288039	0.0294625	0.0247794	0.0258129	0.0275831	7:100884718:C:T-ENSG00000087085.16	-0.379054	-0.379064	-0.380998	-0.38028	-0.379329	0.26639	0.355615	0.20569	0.266693	0.236513
ENSG00000097021.21	ACOT7	1:6398759:T:C	0.00545195	0.00563102	0.00457676	0.00410562	0.0046277	1:6398759:T:C-ENSG00000097021.21	0.331436	0.33152	0.332349	0.332795	0.332295	0.174313	0.178054	0.15179	0.148827	0.194331
ENSG00000161533.12	ACOX1	17:75963776:A:G	3.93856e-09	1.60785e-08	1.83466e-06	3.71474e-07	8.03739e-08	17:75963776:A:G-ENSG00000161533.12	-0.350797	-0.350592	-0.350602	-0.35077	-0.350784	0.0906921	0.0743615	0.110577	0.0984161	0.0862351
ENSG00000134575.13	ACP2	11:47256731:CT:C	0.0708233	0.0738906	0.00500013	0.0275738	0.031179	11:47256731:CT:C-ENSG00000134575.13	-0.228712	-0.228052	-0.271587	-0.251473	-0.244756	0.153252	0.135402	0.11366	0.16321	0.138174
ENSG00000102575.14	ACP5	19:11577645:T:C	4.78979e-33	4.97527e-19	5.34434e-18	1.56484e-19	4.45896e-16	19:11577645:T:C-ENSG00000102575.14	0.740244	0.740244	0.740245	0.740245	0.740245	0.0732638	0.0980137	0.112995	0.0943368	0.113906
ENSG00000162836.12	ACP6	1:147652507:T:G	5.21595e-07	2.25158e-07	4.07584e-07	6.96082e-07	2.13027e-07	1:147652507:T:G-ENSG00000162836.12	0.575852	0.575901	0.575913	0.57593	0.575945	0.170798	0.176496	0.166186	0.196988	0.145043
ENSG00000111644.8	ACRBP	12:6611216:C:T	0.0064273	0.00997344	0.0109605	0.0110625	0.0112022	12:6611216:C:T-ENSG00000111644.8	0.320197	0.318976	0.319164	0.319254	0.31914	0.150742	0.170948	0.148545	0.205301	0.213564
ENSG00000151726.16	ACSL1	4:184777557:G:C	0.0897275	0.0863879	0.0897621	0.0879682	0.0462715	4:184777557:G:C-ENSG00000151726.16	0.192009	0.193191	0.192447	0.192923	0.203334	0.180786	0.133652	0.180592	0.197084	0.153895
ENSG00000197142.11	ACSL5	10:112419103:CTG:C	0.000148107	0.000238848	0.000334577	0.000355423	0.000381483	10:112419103:CTG:C-ENSG00000197142.11	0.312271	0.312115	0.311951	0.312239	0.312038	0.129228	0.111461	0.105687	0.142364	0.122603
ENSG00000005187.12	ACSM3	16:20623925:A:C	0.0347745	0.0355059	0.0392663	0.0363181	0.0389934	16:20623925:A:C-ENSG00000005187.12	0.318734	0.318745	0.318274	0.319249	0.317933	0.203151	0.2174	0.252168	0.23438	0.226494
ENSG00000154930.15	ACSS1	20:25057848:G:T	0.0714929	0.0340438	0.0739886	0.0714781	0.0621033	20:25057848:G:T-ENSG00000154930.15	0.242388	0.255024	0.243216	0.243966	0.245453	0.229242	0.142564	0.194209	0.206562	0.19505
ENSG00000111058.8	ACSS3	12:80937479:G:A	0.000315963	0.000422384	0.000316431	0.000344296	0.000384544	12:80937479:G:A-ENSG00000111058.8	-0.567576	-0.567497	-0.567693	-0.567632	-0.567612	0.263969	0.28663	0.206483	0.192486	0.266353
ENSG00000107796.13	ACTA2	10:88990206:A:G	0	0	3.33067e-16	1.11022e-15	0	10:88990206:A:G-ENSG00000107796.13	-0.671833	-0.671835	-0.671838	-0.671841	-0.671841	0.0841605	0.101248	0.10666	0.118071	0.106667
ENSG00000213763.4	ACTBP2	5:77741016:A:G	0.018755	0.0204536	0.0225678	0.0135324	0.0200611	5:77741016:A:G-ENSG00000213763.4	0.38102	0.380544	0.379796	0.384933	0.380812	0.195998	0.255657	0.249735	0.195566	0.287568
ENSG00000184009.13	ACTG1	17:81568506:A:G	0.0387261	0.0182041	0.0348678	0.0337486	0.0333876	17:81568506:A:G-ENSG00000184009.13	0.169282	0.17601	0.171704	0.172157	0.171679	0.104962	0.0974747	0.11643	0.115552	0.133121
ENSG00000072110.16	ACTN1	14:68940677:TA:T	0.00361885	0.00519199	0.00561015	0.00545248	0.00551687	14:68940677:TA:T-ENSG00000072110.16	0.226277	0.225464	0.225763	0.226036	0.225963	0.119079	0.110839	0.105753	0.110304	0.127132
ENSG00000259062.2	ACTN1-DT	14:68938736:T:C	0.0280107	0.0120617	0.121196	0.0291056	0.0644036	14:68938736:T:C-ENSG00000259062.2	0.266657	0.286978	0.226256	0.274695	0.248127	0.157108	0.138866	0.182208	0.193667	0.166429
ENSG00000248746.6	ACTN3	11:66573534:C:G	0.0491587	0.0472079	0.0446329	0.0286495	0.0438248	11:66573534:C:G-ENSG00000248746.6	0.271467	0.272506	0.272931	0.280939	0.273052	0.215398	0.192368	0.175545	0.171709	0.221764
ENSG00000130402.14	ACTN4	19:38611705:C:T	0.0795852	0.0434125	0.0688448	0.0643506	0.0738659	19:38611705:C:T-ENSG00000130402.14	-0.249372	-0.2642	-0.254632	-0.256424	-0.251423	0.311936	0.166436	0.191032	0.187384	0.229391
ENSG00000131966.14	ACTR10	14:58223710:T:TA	0.0300211	0.0498094	0.0499666	0.0522369	0.0553027	14:58223710:T:TA-ENSG00000131966.14	-0.357552	-0.350009	-0.35167	-0.350275	-0.349171	0.204517	0.324671	0.258296	0.26066	0.257411
ENSG00000138107.13	ACTR1A	10:102476930:A:G	0.0620903	0.0312776	0.0486626	0.020301	0.0462757	10:102476930:A:G-ENSG00000138107.13	0.100273	0.107621	0.10389	0.114055	0.104341	0.0744339	0.0530305	0.0850617	0.0801079	0.0817119
ENSG00000115073.8	ACTR1B	2:97712734:C:T	0.0137465	0.0193642	0.0117128	0.0131177	0.0118516	2:97712734:C:T-ENSG00000115073.8	0.19086	0.188568	0.192883	0.191799	0.192438	0.106396	0.10465	0.10407	0.124422	0.124585
ENSG00000138071.15	ACTR2	2:65245666:C:A	0.030673	0.0130217	0.0286528	0.025793	0.0347597	2:65245666:C:A-ENSG00000138071.15	0.132647	0.138426	0.134219	0.135129	0.132588	0.084359	0.0783162	0.084358	0.0687838	0.109048
ENSG00000115091.12	ACTR3	2:113877663:G:A	0.148874	0.180866	0.1339	0.154193	0.0467417	2:113877663:G:A-ENSG00000115091.12	0.127829	0.118389	0.130986	0.125358	0.15562	0.133498	0.203816	0.095689	0.117859	0.119599
ENSG00000101442.10	ACTR5	20:38764827:G:A	1.57353e-05	7.4426e-06	6.61655e-06	3.53564e-05	8.14018e-06	20:38764827:G:A-ENSG00000101442.10	-0.408285	-0.408579	-0.408903	-0.408663	-0.408903	0.127099	0.123082	0.11936	0.1605	0.151256
ENSG00000151694.15	ADAM17	2:9527284:C:CAAAGA	0.0118104	0.0164683	0.0221385	0.0223428	0.0204677	2:9527284:C:CAAAGA-ENSG00000151694.15	0.307796	0.306095	0.304934	0.304911	0.305603	0.165444	0.163439	0.169782	0.195028	0.208051
ENSG00000042980.14	ADAM28	8:24338701:A:T	0.0467287	0.0409401	0.0480973	0.0502125	0.0455318	8:24338701:A:T-ENSG00000042980.14	-0.314393	-0.316567	-0.315197	-0.314162	-0.315144	0.207085	0.212521	0.24567	0.301703	0.249295
ENSG00000151651.16	ADAM8	10:133298755:C:G	0.000354445	6.5088e-05	0.000240658	0.000280193	0.000181014	10:133298755:C:G-ENSG00000151651.16	0.248125	0.250749	0.250243	0.250202	0.250474	0.080348	0.0868229	0.117903	0.120592	0.0851107
ENSG00000134028.14	ADAMDEC1	8:24351334:G:A	0.00563154	0.011833	0.00135699	0.00923044	0.00551055	8:24351334:G:A-ENSG00000134028.14	0.339047	0.336251	0.344612	0.337616	0.340349	0.147553	0.174718	0.126135	0.162148	0.190077
ENSG00000142303.14	ADAMTS10	19:8570675:A:AT	0.0383017	0.0394935	0.0360286	0.0357938	0.0359057	19:8570675:A:AT-ENSG00000142303.14	-0.416285	-0.416129	-0.417295	-0.417084	-0.416795	0.319865	0.319085	0.281707	0.279716	0.315233
ENSG00000158859.10	ADAMTS4	1:161247903:C:A	0.509401	0.503072	0.441595	0.530149	0.0122627	1:161247903:C:A-ENSG00000158859.10	-0.0464218	0.0560456	0.133742	0.0532677	-0.476645	0.201909	0.192263	0.178206	0.162204	0.16072
ENSG00000143382.16	ADAMTSL4	1:150523912:C:G	0.015419	0.014952	0.0135542	0.0138038	0.012533	1:150523912:C:G-ENSG00000143382.16	-0.330152	-0.330534	-0.33124	-0.331035	-0.331377	0.231967	0.189237	0.166557	0.186334	0.206129
ENSG00000203804.5	ADAMTSL4-AS1	1:150546135:AT:A	0.0470271	0.0592275	0.066397	0.0643421	0.0637481	1:150546135:AT:A-ENSG00000203804.5	0.289215	0.285584	0.284878	0.285273	0.285153	0.219001	0.255204	0.246769	0.22317	0.200651
ENSG00000237781.3	ADAMTSL4-AS2	1:150590376:C:CTT	5.99094e-05	3.80789e-05	2.64768e-05	2.69961e-05	2.8561e-05	1:150590376:C:CTT-ENSG00000237781.3	0.571393	0.571476	0.571599	0.5716	0.571581	0.196863	0.232935	0.206731	0.185365	0.20269
ENSG00000105963.15	ADAP1	7:989676:G:C	0.00975571	0.0246134	0.00897657	0.0209624	0.019214	7:989676:G:C-ENSG00000105963.15	0.305434	0.297738	0.307612	0.299254	0.300604	0.157424	0.265694	0.136182	0.148904	0.236831
ENSG00000173137.12	ADCK5	8:144403718:T:TATGTGCTAC	0.164062	0.140119	0.120748	0.0315025	0.111073	8:144403718:T:TATGTGCTAC-ENSG00000173137.12	0.233879	0.245974	0.250422	0.307746	0.255297	0.295487	0.292285	0.190953	0.160937	0.226386
ENSG00000121281.13	ADCY7	16:50291459:G:C	0.0119534	0.0111048	0.00702586	0.00981284	0.00793026	16:50291459:G:C-ENSG00000121281.13	0.15201	0.152476	0.154464	0.153	0.153651	0.124522	0.0960434	0.0645887	0.0982817	0.0805314
ENSG00000075340.23	ADD2	2:70768101:G:A	0.0122503	0.0123559	0.0127939	0.0112635	0.0112021	2:70768101:G:A-ENSG00000075340.23	0.380777	0.380898	0.380906	0.381618	0.381446	0.210973	0.208831	0.261359	0.189462	0.237646
ENSG00000174837.15	ADGRE1	19:6897453:C:G	0.000601013	0.00068344	0.000606396	0.000594762	0.00020408	19:6897453:C:G-ENSG00000174837.15	0.387859	0.38793	0.388223	0.388421	0.388904	0.140025	0.188307	0.150081	0.169972	0.13722
ENSG00000127507.18	ADGRE2	19:14779664:G:A	2.49864e-08	2.28168e-07	5.33996e-10	1.6529e-07	2.64182e-10	19:14779664:G:A-ENSG00000127507.18	-0.543748	-0.543753	-0.543877	-0.543861	-0.543925	0.128597	0.137528	0.111398	0.159242	0.131495
ENSG00000123146.20	ADGRE5	19:14399603:C:T	0.0339255	0.0331	0.0284401	0.0269631	0.0148654	19:14399603:C:T-ENSG00000123146.20	-0.293468	-0.294205	-0.2953	-0.29615	-0.299764	0.208368	0.233281	0.170643	0.181219	0.156743
ENSG00000205336.14	ADGRG1	16:57611595:G:A	0.0461539	0.046746	0.0518905	0.0460633	0.0109228	16:57611595:G:A-ENSG00000205336.14	0.232806	0.233135	0.231084	0.233082	0.243163	0.199269	0.187372	0.164146	0.127702	0.11187
ENSG00000182885.17	ADGRG3	16:57686651:T:C	0.00550861	0.00755805	0.00726292	0.00417777	0.00870618	16:57686651:T:C-ENSG00000182885.17	0.169186	0.167943	0.16927	0.171453	0.168655	0.0761192	0.0789228	0.115698	0.0818703	0.115039
ENSG00000182551.14	ADI1	2:3498938:A:G	5.48702e-07	3.64442e-06	4.20044e-07	2.29035e-06	1.50158e-06	2:3498938:A:G-ENSG00000182551.14	0.647787	0.647773	0.647828	0.647808	0.647816	0.193724	0.193668	0.17746	0.197893	0.221978
ENSG00000159346.13	ADIPOR1	1:203001733:G:T	0.117382	0.119872	0.0963458	0.132699	0.0153011	1:203001733:G:T-ENSG00000159346.13	0.134711	0.132906	0.142215	0.130688	0.165289	0.13331	0.0819633	0.089517	0.134311	0.0989871
ENSG00000156110.15	ADK	10:74166686:CA:C	0.0613786	0.0375274	0.0675136	0.0635439	0.055638	10:74166686:CA:C-ENSG00000156110.15	0.151941	0.158397	0.151881	0.152901	0.153975	0.111964	0.103662	0.143199	0.130038	0.11163
ENSG00000101126.18	ADNP	20:50882022:G:T	0.00200044	0.900481	0.92787	0.935496	0.907535	20:50882022:G:T-ENSG00000101126.18	0.283553	-0.0118722	-0.0032809	0.000647867	-0.00616317	0.0781425	0.0968664	0.0926854	0.0850876	0.10492
ENSG00000101544.9	ADNP2	18:80147457:T:C	0.0163778	0.0149353	0.0179312	0.0177621	0.0173743	18:80147457:T:C-ENSG00000101544.9	0.432458	0.43311	0.432434	0.43245	0.432401	0.295315	0.249165	0.228229	0.257682	0.285764
ENSG00000116863.11	ADPRS	1:36078636:T:C	0.0245229	0.0352141	0.0480342	0.0574808	0.0482516	1:36078636:T:C-ENSG00000116863.11	0.149827	0.146746	0.145017	0.1417	0.144062	0.108524	0.110475	0.10739	0.0908635	0.0872793
ENSG00000130706.13	ADRM1	20:62311555:C:T	0.523721	0.408403	0.00886881	0.618922	0.559165	20:62311555:C:T-ENSG00000130706.13	0.0226126	-0.0484928	-0.175571	-0.00814212	0.0191269	0.0906673	0.095406	0.0573115	0.0882483	0.0871199
ENSG00000106624.11	AEBP1	7:44143193:CT:C	0.0305192	0.0284885	0.0256842	0.0306043	0.0270711	7:44143193:CT:C-ENSG00000106624.11	-0.193047	-0.194092	-0.195601	-0.193298	-0.194235	0.161374	0.151617	0.118893	0.123064	0.117366
ENSG00000196526.11	AFAP1	4:7932818:T:G	4.41846e-05	3.87506e-05	5.05593e-05	4.19493e-05	3.64815e-05	4:7932818:T:G-ENSG00000196526.11	0.502342	0.502426	0.502458	0.502549	0.502544	0.190846	0.171421	0.214812	0.181136	0.157642
ENSG00000183077.16	AFMID	17:78186962:A:G	0.000594765	0.000293558	0.000642636	0.000543971	0.000662675	17:78186962:A:G-ENSG00000183077.16	0.318713	0.319519	0.318981	0.319496	0.319163	0.139112	0.123422	0.122698	0.117836	0.142051
ENSG00000038002.9	AGA	4:177435857:A:G	8.26399e-06	1.34807e-05	2.1427e-05	1.325e-05	1.65924e-05	4:177435857:A:G-ENSG00000038002.9	0.417221	0.417118	0.417222	0.417499	0.417386	0.136339	0.121802	0.142866	0.143643	0.150495
ENSG00000230869.1	AGAP10P	10:45637004:GA:G	0.0183026	0.0192016	0.0180786	0.0184064	0.0180307	10:45637004:GA:G-ENSG00000230869.1	0.527545	0.527341	0.527938	0.527648	0.527649	0.340862	0.313735	0.316443	0.352105	0.378766
ENSG00000243289.2	AGAP13P	10:46827610:C:T	0.0372897	0.0103834	0.0413619	0.0423235	0.0367762	10:46827610:C:T-ENSG00000243289.2	0.273441	0.283612	0.273129	0.272579	0.274071	0.184935	0.130337	0.234232	0.160411	0.165949
ENSG00000279058.2	AGAP14P	10:46358081:T:C	0.0341952	0.0397245	0.0435606	0.0424003	0.0374175	10:46358081:T:C-ENSG00000279058.2	0.328842	0.327355	0.326935	0.327224	0.328448	0.200788	0.26393	0.252849	0.262997	0.211762
ENSG00000133612.19	AGAP3	7:151068868:G:A	0.000233738	0.000257999	0.000208852	0.000217063	0.000160634	7:151068868:G:A-ENSG00000133612.19	-0.29943	-0.29933	-0.29999	-0.299993	-0.300234	0.134976	0.124678	0.103503	0.117601	0.109373
ENSG00000188234.15	AGAP4	10:45848664:G:A	9.78603e-07	1.56565e-05	1.83007e-05	2.36848e-05	2.05109e-05	10:45848664:G:A-ENSG00000188234.15	-0.466786	-0.466671	-0.46676	-0.466761	-0.466802	0.122735	0.143237	0.154206	0.145326	0.160727
ENSG00000264204.2	AGAP7P	10:46093020:C:G	3.25293e-07	1.39871e-07	6.86448e-09	7.07434e-08	5.08932e-07	10:46093020:C:G-ENSG00000264204.2	0.513556	0.513607	0.513784	0.51373	0.513703	0.138877	0.138335	0.122108	0.133202	0.143063
ENSG00000204172.12	AGAP9	10:47504806:C:T	1.23454e-05	1.50036e-05	1.33585e-05	1.01492e-05	1.09033e-05	10:47504806:C:T-ENSG00000204172.12	-0.81738	-0.817379	-0.817387	-0.817398	-0.817394	0.321813	0.315276	0.310485	0.255861	0.282424
ENSG00000106351.13	AGFG2	7:100566366:C:T	0.0564872	0.0249256	0.042445	0.0592554	0.0152565	7:100566366:C:T-ENSG00000106351.13	0.384715	0.406011	0.391546	0.383789	0.419641	0.26156	0.20498	0.237406	0.305709	0.283498
ENSG00000134698.11	AGO4	1:35851077:G:C	6.51991e-05	0.00121795	0.000548154	0.000542241	0.000425338	1:35851077:G:C-ENSG00000134698.11	0.243088	0.241291	0.242338	0.242431	0.24279	0.0808526	0.127324	0.0997916	0.0944031	0.0745267
ENSG00000204310.13	AGPAT1	6:32130099:G:A	0.00198715	0.0022403	0.00172018	0.00233416	0.00206852	6:32130099:G:A-ENSG00000204310.13	-0.304319	-0.30439	-0.305628	-0.30484	-0.305037	0.114586	0.150423	0.137473	0.17514	0.15267
ENSG00000169692.13	AGPAT2	9:136707414:C:T	0.53347	0.254402	0.486012	0.0292056	0.553384	9:136707414:C:T-ENSG00000169692.13	-0.00685232	0.0597858	0.0155541	0.109799	-0.00856724	0.061215	0.0800478	0.0661972	0.0464911	0.0837607
ENSG00000160216.21	AGPAT3	21:43851335:T:C	0.0109278	0.583082	0.46717	0.449092	0.582054	21:43851335:T:C-ENSG00000160216.21	-0.217399	-0.0434717	-0.0731762	-0.083208	-0.0479304	0.0843964	0.103469	0.115842	0.131332	0.166537
ENSG00000188157.15	AGRN	1:1029460:T:C	0.000104838	0.000103328	0.000136134	5.5369e-05	8.48569e-05	1:1029460:T:C-ENSG00000188157.15	0.519125	0.519149	0.519233	0.519475	0.519343	0.206276	0.172302	0.267747	0.175185	0.182802
ENSG00000135049.16	AGTPBP1	9:85698392:C:T	0.00814196	0.00541808	0.0044275	0.00224172	0.00252866	9:85698392:C:T-ENSG00000135049.16	0.121803	0.124048	0.12298	0.12608	0.125002	0.0795196	0.0913812	0.0542343	0.0535228	0.0505639
ENSG00000177674.16	AGTRAP	1:11730327:CCA:C	0.000404944	0.000404324	0.000402791	0.000434984	0.000404535	1:11730327:CCA:C-ENSG00000177674.16	-0.297013	-0.297193	-0.297806	-0.297579	-0.297727	0.115442	0.111346	0.119737	0.127401	0.140811
ENSG00000173209.23	AHSA2P	2:61172212:T:C	6.7484e-09	3.77654e-08	2.75888e-06	1.21329e-07	2.61679e-08	2:61172212:T:C-ENSG00000173209.23	-0.585128	-0.585106	-0.585122	-0.58516	-0.585165	0.166483	0.126687	0.188226	0.174732	0.146814
ENSG00000186063.13	AIDA	1:222727031:G:C	0.0448187	0.0592654	0.0580612	0.0411163	0.0615515	1:222727031:G:C-ENSG00000186063.13	0.256139	0.25078	0.251695	0.260083	0.250408	0.172033	0.200414	0.210707	0.17097	0.211525
ENSG00000204472.13	AIF1	6:31594338:C:CA	3.70721e-05	3.81995e-05	4.04577e-05	4.25282e-05	4.75783e-05	6:31594338:C:CA-ENSG00000204472.13	-0.348681	-0.348722	-0.348956	-0.34912	-0.349105	0.129904	0.112216	0.102432	0.135731	0.181317
ENSG00000042286.15	AIFM2	10:70132457:A:G	0.226794	0.089133	0.161254	0.0831602	0.0161864	10:70132457:A:G-ENSG00000042286.15	0.176704	0.241091	0.205603	0.240903	0.295582	0.204984	0.182845	0.205389	0.162494	0.144983
ENSG00000183773.16	AIFM3	22:20995387:T:A	0.0188645	0.0191922	0.0188833	0.0170454	0.018797	22:20995387:T:A-ENSG00000183773.16	0.281829	0.28198	0.282241	0.283214	0.282292	0.172519	0.184901	0.142391	0.17025	0.250807
ENSG00000146416.19	AIG1	6:143051900:TA:T	0.741173	0.784674	0.770695	0.81084	0.0160168	6:143051900:TA:T-ENSG00000146416.19	0.0221257	-0.00833085	-0.0262033	-0.00132509	0.512842	0.229248	0.181271	0.181554	0.27881	0.16947
ENSG00000232434.3	AJM1	9:136860922:AG:A	0.000299602	0.000222676	0.000324533	0.00030676	0.000330653	9:136860922:AG:A-ENSG00000232434.3	0.409806	0.410038	0.41003	0.41005	0.41004	0.202321	0.150486	0.183491	0.130972	0.17519
ENSG00000106992.19	AK1	9:127909719:T:TG	0.0019883	0.00221274	0.00178915	0.00169408	0.0011341	9:127909719:T:TG-ENSG00000106992.19	-0.425829	-0.425839	-0.426341	-0.426568	-0.426958	0.164841	0.206138	0.191769	0.200688	0.198596
ENSG00000121057.13	AKAP1	17:57106355:T:C	0.0284019	0.017846	0.0357345	0.0454798	0.0411494	17:57106355:T:C-ENSG00000121057.13	-0.144063	-0.147169	-0.144333	-0.141127	-0.142616	0.0939312	0.0772488	0.0985079	0.0878572	0.15902
ENSG00000108599.15	AKAP10	17:19958145:C:T	0.000126794	0.000357768	0.00607789	0.00352595	0.000230071	17:19958145:C:T-ENSG00000108599.15	0.357511	0.355076	0.351678	0.352543	0.357187	0.131939	0.119453	0.154016	0.12801	0.12905
ENSG00000011243.19	AKAP8L	19:15385121:G:A	0.580096	0.0183113	0.599166	0.588188	0.536994	19:15385121:G:A-ENSG00000011243.19	0.0757582	-0.371218	0.0275678	0.0345803	-0.0418685	0.157559	0.139628	0.15692	0.160168	0.137833
ENSG00000166452.12	AKIP1	11:8919650:T:G	0.0355143	0.0345596	0.0408899	0.042582	0.038286	11:8919650:T:G-ENSG00000166452.12	0.247355	0.247752	0.247	0.246331	0.247395	0.183476	0.155671	0.156164	0.191428	0.214291
ENSG00000174574.16	AKIRIN1	1:38991334:C:T	0.230374	0.0239801	0.233918	0.221602	0.221873	1:38991334:C:T-ENSG00000174574.16	-0.094928	-0.147686	-0.0957205	-0.0980366	-0.0972473	0.0876354	0.082004	0.0980178	0.076128	0.108163
ENSG00000117448.14	AKR1A1	1:45509416:G:GTTTTTT	0.0136742	0.0132987	0.0113142	0.0146559	0.0135487	1:45509416:G:GTTTTTT-ENSG00000117448.14	-0.154973	-0.155492	-0.156663	-0.155166	-0.155591	0.103643	0.110887	0.0677783	0.102727	0.103404
ENSG00000165568.18	AKR1E2	10:4765183:G:GT	0.0270147	0.0267644	0.0278843	0.0234767	0.0257948	10:4765183:G:GT-ENSG00000165568.18	-0.214545	-0.214865	-0.214792	-0.216462	-0.215312	0.149378	0.132883	0.157907	0.130129	0.150163
ENSG00000142208.18	AKT1	14:104796031:C:G	0.00129755	0.000314183	0.00151215	0.00145608	0.000839628	14:104796031:C:G-ENSG00000142208.18	0.250952	0.252332	0.251166	0.251216	0.25212	0.132117	0.087115	0.122797	0.105998	0.0882327
ENSG00000166971.17	AKTIP	16:53475219:G:A	4.53323e-08	1.49296e-10	2.45636e-11	6.04892e-07	1.09742e-06	16:53475219:G:A-ENSG00000166971.17	0.519339	0.519424	0.519476	0.519409	0.519408	0.126645	0.118951	0.0944337	0.12728	0.131429
ENSG00000148218.16	ALAD	9:113390710:C:G	0.0484422	0.0528856	0.0523927	0.0455993	0.0342039	9:113390710:C:G-ENSG00000148218.16	0.32704	0.325625	0.325533	0.328441	0.331786	0.283896	0.229944	0.241712	0.249156	0.210534
ENSG00000023330.15	ALAS1	3:52219996:C:CA	0.0170758	0.0159867	0.0254855	0.0260846	0.0207659	3:52219996:C:CA-ENSG00000023330.15	0.323212	0.324526	0.321132	0.320898	0.322894	0.15128	0.205721	0.216394	0.253313	0.20542
ENSG00000170017.12	ALCAM	3:105367982:A:G	0.0269632	0.0268416	0.0264514	0.0269055	0.0274824	3:105367982:A:G-ENSG00000170017.12	0.425747	0.425964	0.426426	0.426046	0.42563	0.316666	0.334119	0.242031	0.279654	0.279492
ENSG00000161618.10	ALDH16A1	19:49462871:G:T	6.51711e-06	8.28603e-06	2.06884e-05	1.20824e-05	2.10548e-07	19:49462871:G:T-ENSG00000161618.10	-0.50043	-0.500396	-0.500412	-0.500525	-0.500697	0.214826	0.150704	0.142274	0.165014	0.115761
ENSG00000128918.15	ALDH1A2	15:58497805:G:C	0.0181065	0.00874826	0.0183395	0.018337	0.0165485	15:58497805:G:C-ENSG00000128918.15	0.324045	0.327876	0.324649	0.324727	0.325087	0.204278	0.14944	0.180982	0.19939	0.193783
ENSG00000111275.13	ALDH2	12:111770143:C:CA	0.0110281	0.0116478	0.010932	0.010684	0.0109178	12:111770143:C:CA-ENSG00000111275.13	0.470037	0.469914	0.470385	0.470384	0.470224	0.255999	0.263982	0.293551	0.230683	0.35322
ENSG00000072210.19	ALDH3A2	17:19628908:CAGGGAG:C	0.0172551	0.0176133	0.018808	0.0146287	0.018611	17:19628908:CAGGGAG:C-ENSG00000072210.19	0.249793	0.249884	0.249938	0.25209	0.249885	0.139541	0.136866	0.179315	0.150648	0.164915
ENSG00000112294.14	ALDH5A1	6:24540422:C:T	0.0182003	0.0178353	0.0168319	0.0164708	0.0177383	6:24540422:C:T-ENSG00000112294.14	0.198291	0.198774	0.199788	0.199849	0.198916	0.118438	0.118232	0.122407	0.133659	0.125391
ENSG00000118514.14	ALDH8A1	6:134966395:A:G	0.0218206	0.0215732	0.0162197	0.0211256	0.0194302	6:134966395:A:G-ENSG00000118514.14	-0.361588	-0.361868	-0.364961	-0.362006	-0.362616	0.240885	0.220785	0.190503	0.218724	0.241346
ENSG00000143149.13	ALDH9A1	1:165652974:G:A	0.0269054	0.027677	0.0229626	0.0262206	0.0261617	1:165652974:G:A-ENSG00000143149.13	0.337115	0.337001	0.339368	0.337552	0.337407	0.253566	0.217696	0.191015	0.222319	0.219568
ENSG00000182858.14	ALG12	22:49909601:G:A	0.0336766	0.00174907	0.0197456	0.0399051	0.020674	22:49909601:G:A-ENSG00000182858.14	0.359833	0.379405	0.368046	0.357969	0.366114	0.197002	0.12757	0.185828	0.249102	0.222867
ENSG00000251287.9	ALG1L2	3:130119341:T:G	0.00211597	0.0020983	0.00200679	0.0017441	0.00216476	3:130119341:T:G-ENSG00000251287.9	0.411482	0.411634	0.411932	0.412236	0.411743	0.189631	0.19925	0.207517	0.170537	0.184549
ENSG00000159063.14	ALG8	11:78172432:G:A	0.0199747	0.0166194	0.0150932	0.0156437	0.0116149	11:78172432:G:A-ENSG00000159063.14	0.359359	0.361119	0.361742	0.36139	0.363153	0.214778	0.201983	0.182983	0.232079	0.229333
ENSG00000086848.15	ALG9	11:111863420:C:T	0.61027	0.561455	0.460299	0.436072	0.00359417	11:111863420:C:T-ENSG00000086848.15	-0.0227234	-0.0678648	0.10534	0.113177	-0.601999	0.182107	0.188005	0.179071	0.185385	0.179692
ENSG00000215067.12	ALOX12-AS1	17:6988532:A:T	0.0110439	0.00497859	0.0157252	0.0135222	0.0147343	17:6988532:A:T-ENSG00000215067.12	0.286501	0.289158	0.285055	0.286382	0.285337	0.159448	0.123285	0.164562	0.191329	0.142732
ENSG00000161905.13	ALOX15	17:4673325:C:T	0.000365245	0.000511794	0.000641207	0.000414973	0.000144391	17:4673325:C:T-ENSG00000161905.13	-0.528726	-0.528665	-0.528681	-0.528947	-0.529252	0.166965	0.226811	0.257758	0.274287	0.188472
ENSG00000012779.12	ALOX5	10:45421386:T:C	0.0120931	0.00957514	0.0100798	0.00924889	0.00323939	10:45421386:T:C-ENSG00000012779.12	0.135385	0.136261	0.136824	0.137276	0.139337	0.112654	0.0541222	0.0920783	0.0713202	0.0677751
ENSG00000132965.10	ALOX5AP	13:30762242:G:T	0.019239	0.0253618	0.0243818	0.0196152	0.0216492	13:30762242:G:T-ENSG00000132965.10	0.248718	0.246834	0.247561	0.249795	0.248579	0.131678	0.179695	0.186723	0.15166	0.155072
ENSG00000162551.14	ALPL	1:21515322:T:C	0.0190616	0.0281801	0.0220148	0.0163268	0.000301533	1:21515322:T:C-ENSG00000162551.14	0.258624	0.256526	0.259208	0.265334	0.282998	0.0941016	0.140197	0.12362	0.105454	0.117027
ENSG00000162066.16	AMDHD2	16:2522114:C:T	0.00795507	0.00848142	0.00805834	0.00906201	0.0085168	16:2522114:C:T-ENSG00000162066.16	0.470124	0.469997	0.470409	0.469891	0.470093	0.291992	0.355289	0.184412	0.260179	0.365474
ENSG00000159461.15	AMFR	16:56406289:G:A	0.0389365	0.0366743	0.041956	0.0446206	0.0454834	16:56406289:G:A-ENSG00000159461.15	0.293967	0.294823	0.294359	0.292957	0.292306	0.253658	0.189897	0.196334	0.206301	0.225445
ENSG00000104899.8	AMH	19:2246653:G:A	1.22974e-07	1.90616e-08	1.9856e-07	3.23668e-08	1.13537e-09	19:2246653:G:A-ENSG00000104899.8	0.638909	0.638924	0.638931	0.638947	0.638966	0.179508	0.167108	0.166858	0.15551	0.149568
ENSG00000181754.7	AMIGO1	1:109518426:G:T	0.00604281	0.00440202	0.00231752	0.00377825	0.00658085	1:109518426:G:T-ENSG00000181754.7	0.224821	0.225792	0.228476	0.227419	0.225714	0.109279	0.0991176	0.0916301	0.130673	0.169077
ENSG00000151743.11	AMN1	12:31728207:A:G	0.00322552	0.00542579	0.00636011	0.00453345	0.00731488	12:31728207:A:G-ENSG00000151743.11	0.243739	0.242673	0.242754	0.244857	0.242503	0.0949533	0.124074	0.134044	0.134839	0.142743
ENSG00000291140.1	AMZ2P1	17:64975479:G:A	0.00046868	0.000728153	0.000838072	0.000878064	0.000762104	17:64975479:G:A-ENSG00000291140.1	0.552152	0.551981	0.552011	0.552004	0.552093	0.21607	0.221199	0.244551	0.242851	0.24828
ENSG00000129055.13	ANAPC13	3:134485999:C:G	0.00475671	0.00312771	0.00484202	0.0049675	0.00513084	3:134485999:C:G-ENSG00000129055.13	0.333428	0.334389	0.333963	0.333823	0.33373	0.194978	0.136829	0.163324	0.151009	0.200229
ENSG00000285793.1	ANAPC1P2	2:87075937:C:G	0.00861503	0.0170217	0.00793403	0.00511868	0.0193524	2:87075937:C:G-ENSG00000285793.1	-0.430961	-0.426411	-0.43194	-0.436061	-0.425576	0.223097	0.281804	0.206392	0.195724	0.242654
ENSG00000176248.9	ANAPC2	9:137180729:G:C	0.032266	0.0337956	0.0206909	0.0036375	0.0212753	9:137180729:G:C-ENSG00000176248.9	0.183907	0.183717	0.187252	0.197165	0.187181	0.140795	0.127814	0.0890228	0.0875897	0.0909591
ENSG00000053900.11	ANAPC4	4:25407216:G:A	0.0769487	0.0838311	0.0770143	0.0876084	0.0425048	4:25407216:G:A-ENSG00000053900.11	-0.283409	-0.280949	-0.283897	-0.279251	-0.296784	0.286269	0.24521	0.240034	0.204684	0.198307
ENSG00000151150.22	ANK3	10:60723509:G:A	0.00951927	0.00721373	0.0109722	0.0103407	0.0135246	10:60723509:G:A-ENSG00000151150.22	0.256259	0.257943	0.256639	0.257476	0.255423	0.122097	0.130509	0.139691	0.178106	0.15076
ENSG00000166839.18	ANKDD1A	15:64867259:T:C	3.66766e-05	3.7637e-05	4.55462e-05	7.86149e-05	0.000135834	15:64867259:T:C-ENSG00000166839.18	-0.601571	-0.601571	-0.601597	-0.601543	-0.601515	0.252605	0.19688	0.195795	0.206778	0.276249
ENSG00000189045.15	ANKDD1B	5:75601585:A:G	0.0114986	0.00301125	0.0082379	0.0128837	0.00927938	5:75601585:A:G-ENSG00000189045.15	0.502949	0.509654	0.505435	0.502657	0.504219	0.264975	0.20644	0.253848	0.281496	0.289103
ENSG00000185722.18	ANKFY1	17:4274927:T:TGTAGTCCCA	0.646242	0.681764	0.0431298	0.720281	0.596027	17:4274927:T:TGTAGTCCCA-ENSG00000185722.18	0.0262853	0.016432	0.310743	-0.010652	0.0386037	0.146134	0.134047	0.118964	0.120809	0.124422
ENSG00000001629.10	ANKIB1	7:92290370:AGT:A	0.0303958	0.0316719	0.0362291	0.0145755	0.0310899	7:92290370:AGT:A-ENSG00000001629.10	0.263079	0.262838	0.26078	0.272814	0.26321	0.175882	0.189727	0.135944	0.144753	0.201851
ENSG00000170209.5	ANKK1	11:113368790:T:C	0.0555423	0.0582695	0.0536175	0.0522436	0.0418237	11:113368790:T:C-ENSG00000170209.5	0.284273	0.283799	0.285045	0.28526	0.287733	0.206724	0.250435	0.238741	0.213679	0.20061
ENSG00000160117.16	ANKLE1	19:17318078:G:A	0.430012	0.0304363	0.257077	0.340142	0.483066	19:17318078:G:A-ENSG00000160117.16	0.0869938	0.325702	0.168747	0.124679	0.0602621	0.277428	0.152626	0.196988	0.189614	0.222282
ENSG00000144504.16	ANKMY1	2:240570295:C:T	0.0156066	0.0215061	0.0156795	0.0171865	0.00152801	2:240570295:C:T-ENSG00000144504.16	0.346486	0.344198	0.346965	0.346401	0.355053	0.159287	0.210871	0.159436	0.190803	0.134725
ENSG00000164331.10	ANKRA2	5:73579082:A:C	0.00594407	0.0672762	0.0527755	0.0712651	0.0778405	5:73579082:A:C-ENSG00000164331.10	-0.251228	-0.222062	-0.232431	-0.220702	-0.219445	0.117471	0.167605	0.127224	0.118046	0.15158
ENSG00000088448.14	ANKRD10	13:110878917:C:T	0.0216843	0.0437757	0.0148605	0.00622371	0.0265107	13:110878917:C:T-ENSG00000088448.14	0.214674	0.206969	0.218811	0.226654	0.21265	0.143651	0.125262	0.11217	0.105053	0.129222
ENSG00000167522.17	ANKRD11	16:89494715:C:T	0.230066	0.267435	0.0682643	0.0876121	0.0456832	16:89494715:C:T-ENSG00000167522.17	0.155113	0.146184	0.262447	0.215948	0.266371	0.390003	0.190702	0.246603	0.167866	0.184149
ENSG00000101745.17	ANKRD12	18:9182331:T:TA	0.114617	0.112683	0.0945364	0.10449	0.0317966	18:9182331:T:TA-ENSG00000101745.17	0.101398	0.102207	0.104988	0.102874	0.115239	0.123036	0.097823	0.0740719	0.1011	0.0650366
ENSG00000118454.13	ANKRD13C	1:70355635:A:ATC	0.135091	0.128449	0.0856865	0.102786	0.0204862	1:70355635:A:ATC-ENSG00000118454.13	0.0990542	0.101561	0.108948	0.104522	0.120141	0.0952369	0.106826	0.0769398	0.0890978	0.062073
ENSG00000172932.16	ANKRD13D	11:67249974:C:CA	0.0231155	0.78401	0.794633	0.799348	0.797896	11:67249974:C:CA-ENSG00000172932.16	-0.19239	-0.013513	-0.0141191	-0.0132488	-0.0141075	0.072068	0.0947505	0.0663797	0.101636	0.0936239
ENSG00000180071.21	ANKRD18A	9:38575093:CA:C	0.00132676	0.000901357	0.00113154	0.00112962	0.00107247	9:38575093:CA:C-ENSG00000180071.21	0.719385	0.719725	0.719563	0.719561	0.719553	0.332835	0.333456	0.339254	0.365546	0.320364
ENSG00000189127.8	ANKRD34B	5:80538319:G:A	0.0126241	0.0159441	0.016265	0.0170115	0.0158318	5:80538319:G:A-ENSG00000189127.8	0.473398	0.472112	0.472485	0.472058	0.47247	0.273481	0.284651	0.266059	0.268761	0.312366
ENSG00000135976.21	ANKRD36	2:97086046:G:A	0.00105187	0.00090442	0.00096815	0.000769327	0.000693736	2:97086046:G:A-ENSG00000135976.21	0.228845	0.229451	0.229298	0.230455	0.230236	0.113079	0.0961427	0.0958113	0.0965621	0.09777
ENSG00000196912.13	ANKRD36B	2:97547721:C:G	9.58238e-06	1.26865e-05	9.99881e-06	6.28959e-05	1.24129e-06	2:97547721:C:G-ENSG00000196912.13	-0.37759	-0.377717	-0.37805	-0.377855	-0.378621	0.103917	0.121896	0.115202	0.137202	0.111729
ENSG00000154945.7	ANKRD40	17:50755076:G:T	0.0339272	0.0557193	0.0670717	0.0758022	0.073775	17:50755076:G:T-ENSG00000154945.7	-0.164675	-0.159051	-0.15901	-0.156306	-0.156857	0.102646	0.123997	0.113053	0.125746	0.160969
ENSG00000065413.20	ANKRD44	2:197280446:C:T	0.206925	0.303787	0.043679	0.18853	0.276953	2:197280446:C:T-ENSG00000065413.20	-0.0876963	-0.0647612	-0.135162	-0.0878922	-0.0727927	0.1321	0.146841	0.0749986	0.0867776	0.0869094
ENSG00000186106.11	ANKRD46	8:100551580:C:T	0.620106	0.0219289	0.41973	0.377345	0.474784	8:100551580:C:T-ENSG00000186106.11	0.00262538	0.304753	0.0735593	-0.12165	0.0447484	0.137693	0.111586	0.131581	0.149143	0.15697
ENSG00000100124.15	ANKRD54	22:37844361:G:C	1.73598e-05	1.93154e-05	2.15339e-05	2.12671e-05	2.17018e-05	22:37844361:G:C-ENSG00000100124.15	0.613819	0.613821	0.613849	0.613856	0.613854	0.2709	0.216758	0.232316	0.189482	0.200202
ENSG00000185101.13	ANO9	11:463290:T:C	0.00617738	0.00534579	0.00518825	0.00464157	0.00292902	11:463290:T:C-ENSG00000185101.13	0.29894	0.299667	0.300067	0.300913	0.30163	0.149835	0.12744	0.158375	0.159887	0.151494
ENSG00000166825.15	ANPEP	15:89814887:A:G	0	0	0	0	2.09659e-10	15:89814887:A:G-ENSG00000166825.15	-0.458345	-0.458177	-0.458158	-0.458427	-0.458063	0.0690398	0.0563546	0.0503876	0.0613809	0.0657946
ENSG00000122359.18	ANXA11	10:80160044:T:C	0.231266	0.0135035	0.241279	0.229375	0.217535	10:80160044:T:C-ENSG00000122359.18	0.0816823	0.125503	0.0814875	0.0840983	0.0840207	0.0845596	0.0548159	0.0707808	0.0845577	0.0759285
ENSG00000196975.16	ANXA4	2:69619763:C:T	0.0249063	0.0207018	0.0191663	0.0151693	0.0167475	2:69619763:C:T-ENSG00000196975.16	0.261446	0.263603	0.263931	0.265993	0.26474	0.157854	0.159121	0.194086	0.137315	0.178342
ENSG00000164111.15	ANXA5	4:121696962:C:T	8.96188e-07	1.86512e-07	1.7775e-07	1.62086e-07	1.26181e-07	4:121696962:C:T-ENSG00000164111.15	0.638715	0.638736	0.63876	0.638774	0.638776	0.221488	0.173826	0.18047	0.185012	0.178077
ENSG00000143412.10	ANXA9	1:150935479:A:G	0.404194	0.252513	0.0476552	0.25123	0.209392	1:150935479:A:G-ENSG00000143412.10	0.0428877	-0.107519	-0.37788	-0.111078	0.260967	0.282696	0.261988	0.182909	0.236471	0.230187
ENSG00000136250.12	AOAH	7:36707043:CTT:C	0.0145601	0.0199127	0.0116875	0.00999232	0.0106982	7:36707043:CTT:C-ENSG00000136250.12	-0.272849	-0.270957	-0.274768	-0.276968	-0.275839	0.145481	0.151495	0.140421	0.163135	0.194754
ENSG00000002726.21	AOC1	7:150858914:T:C	0.00574154	0.00537461	0.00428557	0.00502811	0.00477402	7:150858914:T:C-ENSG00000002726.21	0.30479	0.305256	0.30618	0.305585	0.305761	0.179907	0.177549	0.122004	0.149648	0.174281
ENSG00000148120.18	AOPEP	9:94704512:T:C	0.00367103	0.00521845	0.0039298	0.00586156	0.00422942	9:94704512:T:C-ENSG00000148120.18	0.271896	0.271003	0.272951	0.271274	0.271935	0.123744	0.149866	0.147072	0.173385	0.112679
ENSG00000100280.17	AP1B1	22:29436111:A:G	0.000342592	0.00185938	0.00192488	0.00218235	0.00194865	22:29436111:A:G-ENSG00000100280.17	0.226515	0.225291	0.225818	0.225665	0.226015	0.0796205	0.0957773	0.0897824	0.117305	0.103705
ENSG00000213983.12	AP1G2	14:23570367:CT:C	0.0170738	0.0236185	0.00999589	0.011537	0.00754268	14:23570367:CT:C-ENSG00000213983.12	-0.392573	-0.389699	-0.397408	-0.394945	-0.39872	0.286762	0.253787	0.196799	0.188522	0.203244
ENSG00000258727.1	AP1G2-AS1	14:23562756:AAGAG:A	0.00261224	0.00137415	0.0025527	0.00246867	0.0024362	14:23562756:AAGAG:A-ENSG00000258727.1	0.465637	0.466502	0.46592	0.465933	0.465951	0.285771	0.190349	0.247103	0.170869	0.234976
ENSG00000072958.9	AP1M1	19:16236438:G:A	0.00352723	0.00312193	0.00303937	0.00380806	8.00761e-05	19:16236438:G:A-ENSG00000072958.9	0.324258	0.324911	0.325195	0.324707	0.328308	0.139141	0.132289	0.112358	0.132864	0.107837
ENSG00000129354.12	AP1M2	19:10615925:G:T	0.000754062	0.000724282	0.000654929	0.000699852	0.000680255	19:10615925:G:T-ENSG00000129354.12	-0.584034	-0.584096	-0.584221	-0.584196	-0.584189	0.262712	0.264403	0.20163	0.324713	0.287561
ENSG00000196961.13	AP2A1	19:49719698:T:C	0.0299355	0.023741	0.0246992	0.0181443	0.0264332	19:49719698:T:C-ENSG00000196961.13	0.262907	0.265808	0.265016	0.26843	0.264181	0.21336	0.17401	0.162056	0.13946	0.173469
ENSG00000183020.15	AP2A2	11:927250:TG:T	0.0308791	0.0310304	0.0187348	0.0214128	0.0230994	11:927250:TG:T-ENSG00000183020.15	-0.169964	-0.170078	-0.176034	-0.173178	-0.17236	0.124209	0.106276	0.138746	0.0936107	0.11333
ENSG00000103723.17	AP3B2	15:82702846:T:C	0.00892526	0.00871677	0.00866799	0.00784708	0.00789713	15:82702846:T:C-ENSG00000103723.17	0.485308	0.485516	0.485656	0.486096	0.485859	0.225025	0.234645	0.367506	0.293526	0.314256
ENSG00000065000.20	AP3D1	19:2141111:A:C	0.0371795	0.0132805	0.0501364	0.0288389	0.0159734	19:2141111:A:C-ENSG00000065000.20	0.186505	0.195725	0.183335	0.191181	0.196296	0.15332	0.0855604	0.109899	0.145863	0.122644
ENSG00000185009.13	AP3M1	10:74117387:C:G	0.0392118	0.614413	0.536768	0.552909	0.51743	10:74117387:C:G-ENSG00000185009.13	-0.269758	-0.0390562	-0.0689783	-0.0631312	-0.0816327	0.135628	0.167808	0.195749	0.197563	0.20997
ENSG00000157823.17	AP3S2	15:89901449:G:T	0.00215083	0.00557314	0.00622338	0.00603336	0.00875008	15:89901449:G:T-ENSG00000157823.17	-0.329859	-0.327837	-0.328284	-0.3286	-0.327007	0.135418	0.138609	0.172252	0.177994	0.17501
ENSG00000221838.10	AP4M1	7:100113838:AC:A	1.16237e-05	4.27999e-05	6.88438e-05	8.41965e-05	5.62476e-05	7:100113838:AC:A-ENSG00000221838.10	-0.40008	-0.399865	-0.399985	-0.400023	-0.400058	0.134048	0.113	0.160938	0.16172	0.129416
ENSG00000125843.11	AP5S1	20:3810781:G:T	0.00828051	0.0114907	0.00452668	0.00790881	0.00852306	20:3810781:G:T-ENSG00000125843.11	0.262185	0.260973	0.264413	0.262599	0.262485	0.173354	0.207363	0.097081	0.139912	0.157942
ENSG00000242802.9	AP5Z1	7:4786055:G:T	0.133772	0.057543	0.0219227	0.125356	0.101634	7:4786055:G:T-ENSG00000242802.9	-0.146341	-0.173835	-0.189653	-0.148663	-0.155264	0.124729	0.1291	0.0902555	0.145429	0.165551
ENSG00000120868.14	APAF1	12:98665245:T:C	0.0189052	0.0187766	0.0172617	0.0179217	0.0178128	12:98665245:T:C-ENSG00000120868.14	-0.222811	-0.223144	-0.22441	-0.223879	-0.223729	0.131253	0.128729	0.137743	0.146677	0.154433
ENSG00000034053.15	APBA2	15:28921843:T:G	0.0236754	0.0237437	0.0203063	0.010138	0.0174467	15:28921843:T:G-ENSG00000034053.15	0.270542	0.270805	0.271835	0.277994	0.273424	0.17099	0.166974	0.154668	0.138587	0.163076
ENSG00000077420.16	APBB1IP	10:26452587:C:T	0.583018	0.580128	0.549784	0.539212	0.0159362	10:26452587:C:T-ENSG00000077420.16	0.0368941	0.0379694	0.0420431	0.0449922	0.160771	0.0682324	0.0689738	0.0755353	0.0759209	0.0759193
ENSG00000154856.13	APCDD1	18:10448542:C:T	0.0299954	0.0268339	0.0338592	0.0335094	0.0285395	18:10448542:C:T-ENSG00000154856.13	0.392357	0.393721	0.391803	0.391821	0.393105	0.27274	0.236895	0.288681	0.320565	0.235295
ENSG00000164062.13	APEH	3:49693192:G:A	3.96499e-05	6.21093e-06	1.54773e-05	2.87219e-05	3.23874e-05	3:49693192:G:A-ENSG00000164062.13	0.451786	0.452093	0.452009	0.45205	0.45202	0.197834	0.153615	0.112023	0.173153	0.15961
ENSG00000149089.13	APIP	11:34895110:C:T	1.91168e-08	7.83162e-09	1.58089e-08	5.27445e-09	1.77164e-08	11:34895110:C:T-ENSG00000149089.13	0.691442	0.691448	0.691456	0.691465	0.69146	0.189729	0.184698	0.189257	0.179046	0.176504
ENSG00000128394.17	APOBEC3F	22:39029932:G:C	0.0291389	0.0348244	0.0346382	0.0107604	0.0400745	22:39029932:G:C-ENSG00000128394.17	0.165147	0.163472	0.164116	0.172508	0.162698	0.103439	0.102681	0.122526	0.0807169	0.113471
ENSG00000239713.9	APOBEC3G	22:39100331:G:T	0.0310878	0.0294588	0.0305758	0.0305049	0.0197044	22:39100331:G:T-ENSG00000239713.9	0.281313	0.28202	0.281946	0.281869	0.284541	0.249528	0.164052	0.23074	0.194481	0.1476
ENSG00000178878.13	APOLD1	12:12720814:T:C	3.0698e-12	6.89702e-16	1.36842e-10	9.08708e-13	7.41455e-12	12:12720814:T:C-ENSG00000178878.13	0.588801	0.588816	0.588818	0.588843	0.588843	0.116576	0.09044	0.116242	0.117736	0.131316
ENSG00000142192.22	APP	21:26153005:A:C	0.0431622	0.041809	0.037781	0.0361754	0.0360089	21:26153005:A:C-ENSG00000142192.22	0.27487	0.275757	0.276584	0.277148	0.276676	0.224032	0.247361	0.16097	0.214208	0.191648
ENSG00000136044.12	APPL2	12:105204957:G:T	0.29673	0.000271629	0.34244	0.280048	0.296835	12:105204957:G:T-ENSG00000136044.12	-0.141113	-0.249356	-0.126943	-0.144394	-0.137675	0.144644	0.0746106	0.107535	0.0797466	0.0966188
ENSG00000198931.11	APRT	16:88826605:C:G	0.626041	0.612267	0.618797	0.611444	0.0375641	16:88826605:C:G-ENSG00000198931.11	0.0399161	0.0453362	0.0414574	0.0436253	0.190616	0.154165	0.155327	0.124967	0.121913	0.0983281
ENSG00000214293.11	APTR	7:77649163:C:T	0.442211	0.0135479	0.428954	0.441651	0.63389	7:77649163:C:T-ENSG00000214293.11	0.0903921	0.364751	-0.0864182	-0.0894523	0.00318972	0.211884	0.126757	0.170733	0.204656	0.21225
ENSG00000240583.14	AQP1	7:30919557:CTT:C	0.0332402	0.0327122	0.0353073	0.0249635	0.0345987	7:30919557:CTT:C-ENSG00000240583.14	0.342402	0.342672	0.342031	0.348339	0.341963	0.250425	0.183016	0.255137	0.255605	0.23626
ENSG00000143595.13	AQP10	1:154338201:C:A	0.0040158	0.00348511	0.00332019	0.00295512	0.00292557	1:154338201:C:A-ENSG00000143595.13	-0.272815	-0.273569	-0.273767	-0.274307	-0.274114	0.158334	0.136608	0.128055	0.116853	0.135838
ENSG00000165272.16	AQP3	9:33439298:G:A	0.0748093	0.0616273	0.0467223	0.0302622	0.0377411	9:33439298:G:A-ENSG00000165272.16	0.181599	0.186976	0.188981	0.197923	0.193215	0.13306	0.164306	0.132162	0.121862	0.155513
ENSG00000103569.10	AQP9	15:58178000:T:C	0.0275159	0.00952874	0.0251385	0.0239079	0.0339663	15:58178000:T:C-ENSG00000103569.10	0.172971	0.182187	0.176008	0.176512	0.172331	0.0868409	0.109112	0.113046	0.099015	0.116244
ENSG00000021776.11	AQR	15:34928901:T:C	0.0108042	0.00927163	0.0117622	0.0187523	0.0100149	15:34928901:T:C-ENSG00000021776.11	0.215806	0.216646	0.216028	0.213278	0.216822	0.141886	0.109609	0.105915	0.134049	0.122955
ENSG00000120318.16	ARAP3	5:141670089:A:G	0.00255358	0.0022301	0.0021016	0.00146809	0.00248684	5:141670089:A:G-ENSG00000120318.16	0.353619	0.35387	0.354309	0.355053	0.353944	0.237156	0.14973	0.176976	0.135284	0.159811
ENSG00000165527.8	ARF6	14:49882379:G:A	0.0090161	0.00904917	0.00908628	0.00858888	0.00680409	14:49882379:G:A-ENSG00000165527.8	-0.32548	-0.325641	-0.325805	-0.326123	-0.326718	0.187248	0.180208	0.180091	0.157727	0.170218
ENSG00000066777.9	ARFGEF1	8:67319119:T:C	0.503002	0.55208	0.0353477	0.386989	0.509587	8:67319119:T:C-ENSG00000066777.9	-0.0403802	-0.0282486	-0.186468	-0.0621465	-0.0379256	0.128678	0.141389	0.0834936	0.0865965	0.104859
ENSG00000164144.16	ARFIP1	4:152730373:A:G	0.000746624	0.000729555	0.000704413	0.000740005	0.000653932	4:152730373:A:G-ENSG00000164144.16	0.394674	0.394834	0.395106	0.394948	0.395056	0.201134	0.207378	0.173294	0.145812	0.143014
ENSG00000075884.14	ARHGAP15	2:143138661:C:A	0.0585735	0.0228878	0.0544745	0.00955696	0.0367702	2:143138661:C:A-ENSG00000075884.14	-0.221714	-0.241437	-0.223158	-0.249239	-0.229723	0.186279	0.158192	0.126779	0.108588	0.158329
ENSG00000128805.15	ARHGAP22	10:48620282:G:GT	0.00044854	0.000442964	0.000329405	0.000353695	0.000338752	10:48620282:G:GT-ENSG00000128805.15	0.397803	0.397932	0.398436	0.398427	0.3984	0.171749	0.172684	0.134622	0.166494	0.165695
ENSG00000145819.18	ARHGAP26	5:142761415:C:T	0.130804	0.130603	0.116501	0.117219	0.0457888	5:142761415:C:T-ENSG00000145819.18	0.151795	0.152333	0.154547	0.154833	0.17274	0.198665	0.137806	0.108001	0.178493	0.135346
ENSG00000186517.14	ARHGAP30	1:161043522:T:C	0.00810315	0.781787	0.808962	0.82588	0.797102	1:161043522:T:C-ENSG00000186517.14	-0.211244	0.0237041	-0.00737361	-0.0043344	0.00810221	0.0669743	0.0876791	0.120993	0.110831	0.098375
ENSG00000004777.19	ARHGAP33	19:35763455:C:T	0.0157751	0.146735	0.190181	0.18315	0.187547	19:35763455:C:T-ENSG00000004777.19	-0.190455	-0.150804	-0.143271	-0.144754	-0.143164	0.0994284	0.119605	0.16337	0.135933	0.103081
ENSG00000123329.20	ARHGAP9	12:57476338:A:C	0.000138938	0.000109373	5.68084e-05	9.28358e-05	6.93252e-05	12:57476338:A:C-ENSG00000123329.20	0.347741	0.348018	0.348507	0.348546	0.348583	0.1608	0.158915	0.0900447	0.185766	0.132033
ENSG00000111348.9	ARHGDIB	12:14941036:T:TG	0.0847388	0.0322305	0.110508	0.106389	0.101005	12:14941036:T:TG-ENSG00000111348.9	0.13363	0.146364	0.128989	0.129893	0.130551	0.145285	0.0900285	0.0988738	0.100465	0.104211
ENSG00000110237.5	ARHGEF17	11:73357526:T:C	1.32295e-07	1.58726e-07	9.12871e-08	2.45037e-07	9.42207e-08	11:73357526:T:C-ENSG00000110237.5	0.659405	0.65941	0.659436	0.659433	0.659442	0.19324	0.183158	0.175148	0.196379	0.20196
ENSG00000142632.17	ARHGEF19	1:16200034:G:A	0.00211112	0.0022197	0.00219976	0.00156884	0.00174177	1:16200034:G:A-ENSG00000142632.17	-0.373598	-0.373671	-0.373744	-0.374716	-0.374437	0.173567	0.188427	0.151061	0.150544	0.205549
ENSG00000273002.1	ARHGEF2-AS2	1:155953265:C:CA	0.00556819	0.00489735	0.00947989	0.00747015	0.00346388	1:155953265:C:CA-ENSG00000273002.1	-0.427568	-0.428499	-0.425924	-0.426902	-0.429821	0.212378	0.193429	0.212828	0.233792	0.20318
ENSG00000244198.7	ARHGEF35-AS1	7:144224268:A:G	0.000261746	0.000279295	0.000296103	0.000339508	0.000285252	7:144224268:A:G-ENSG00000244198.7	0.595831	0.595844	0.595896	0.59587	0.595913	0.217195	0.241211	0.216699	0.329847	0.275702
ENSG00000152219.5	ARL14EP	11:30331477:A:G	0.0187708	0.0171795	0.0169682	0.00900915	0.0188224	11:30331477:A:G-ENSG00000152219.5	-0.259396	-0.260832	-0.26052	-0.265494	-0.260074	0.139643	0.184423	0.131518	0.133094	0.191377
ENSG00000214087.9	ARL16	17:81667744:A:T	0	0	0	5.77316e-15	0	17:81667744:A:T-ENSG00000214087.9	-0.977976	-0.977976	-0.977976	-0.977976	-0.977976	0.157079	0.146549	0.121903	0.172793	0.160278
ENSG00000185829.19	ARL17A	17:46610102:TTCTC:T	0.0178971	0.0187632	0.0173415	0.0170473	0.0166375	17:46610102:TTCTC:T-ENSG00000185829.19	0.474237	0.474072	0.474622	0.474641	0.47464	0.321082	0.319887	0.25909	0.279677	0.30611
ENSG00000228696.11	ARL17B	17:46358858:G:A	5.00633e-08	3.06143e-08	2.7643e-08	2.43869e-08	4.10421e-08	17:46358858:G:A-ENSG00000228696.11	0.92036	0.920361	0.920362	0.920362	0.920362	0.309091	0.290581	0.245897	0.225739	0.281913
ENSG00000188042.8	ARL4C	2:234510771:G:A	0.0696362	0.0242457	0.0830681	0.040418	0.0474733	2:234510771:G:A-ENSG00000188042.8	0.185593	0.210565	0.182617	0.20345	0.19708	0.131103	0.129325	0.121106	0.131938	0.202005
ENSG00000175906.5	ARL4D	17:43407236:AGTGGGGAG:A	0.0621739	0.0661524	0.0620754	0.0609052	0.0482396	17:43407236:AGTGGGGAG:A-ENSG00000175906.5	0.229415	0.228601	0.229868	0.229977	0.232968	0.175536	0.179797	0.194244	0.184514	0.192103
ENSG00000177917.12	ARL6IP6	2:152762136:ATGAG:A	0.0146847	0.0155193	0.0145426	0.0113555	0.0154659	2:152762136:ATGAG:A-ENSG00000177917.12	-0.318391	-0.318332	-0.318957	-0.320991	-0.318473	0.164915	0.20275	0.17562	0.184834	0.197465
ENSG00000162704.16	ARPC5	1:183621777:G:A	5.58816e-08	5.09699e-12	1.26587e-09	1.92423e-09	2.78267e-07	1:183621777:G:A-ENSG00000162704.16	0.335824	0.336322	0.336234	0.336438	0.336098	0.0946683	0.0597203	0.071479	0.0787908	0.0900853
ENSG00000137486.17	ARRB1	11:75356874:A:G	0.0032597	0.00317931	0.0033691	0.00311599	0.00125532	11:75356874:A:G-ENSG00000137486.17	0.296966	0.29742	0.297274	0.297794	0.298706	0.13796	0.16894	0.138709	0.142565	0.111496
ENSG00000141480.18	ARRB2	17:4671456:T:A	0.00541626	0.000946409	0.00643152	0.00673721	0.00596728	17:4671456:T:A-ENSG00000141480.18	0.249659	0.251992	0.249382	0.249614	0.250047	0.114973	0.0931572	0.107706	0.135874	0.127126
ENSG00000105643.11	ARRDC2	19:18012808:A:G	0.0359491	0.0368883	0.0257696	0.0232879	0.0249288	19:18012808:A:G-ENSG00000105643.11	-0.292718	-0.292851	-0.296362	-0.297372	-0.296062	0.24665	0.206404	0.194178	0.16402	0.190765
ENSG00000113369.9	ARRDC3	5:91362575:A:T	0.043925	0.0476347	0.0419794	0.0381012	0.0414601	5:91362575:A:T-ENSG00000113369.9	-0.224896	-0.224129	-0.225655	-0.226762	-0.225481	0.183208	0.209094	0.162491	0.148297	0.155448
ENSG00000140450.9	ARRDC4	15:97971991:A:C	6.94225e-05	7.34549e-05	7.17764e-05	6.51855e-05	5.23422e-05	15:97971991:A:C-ENSG00000140450.9	-0.638694	-0.638706	-0.638737	-0.638768	-0.638782	0.245431	0.293695	0.252539	0.226526	0.211643
ENSG00000205784.4	ARRDC5	19:4857017:T:C	0.27416	0.256219	0.027852	0.26677	0.270261	19:4857017:T:C-ENSG00000205784.4	-0.149244	-0.155887	-0.283865	-0.151916	-0.150055	0.165137	0.173052	0.13942	0.192848	0.16454
ENSG00000100299.18	ARSA	22:50625049:T:C	2.78201e-06	2.67749e-06	2.84771e-06	7.3101e-06	5.71726e-06	22:50625049:T:C-ENSG00000100299.18	-0.52373	-0.523754	-0.523821	-0.523811	-0.523786	0.195181	0.162105	0.14566	0.220256	0.149496
ENSG00000113273.17	ARSB	5:78938418:C:T	0.00637195	0.00549001	0.00678119	0.0069013	0.00757552	5:78938418:C:T-ENSG00000113273.17	0.471027	0.47153	0.471275	0.471134	0.470704	0.291293	0.207182	0.271371	0.271799	0.229764
ENSG00000173409.14	ARV1	1:230936925:A:G	0.0534486	0.0558539	0.0393633	0.0266148	0.0329455	1:230936925:A:G-ENSG00000173409.14	0.169668	0.16968	0.172531	0.177218	0.174286	0.154832	0.161079	0.124997	0.103315	0.106995
ENSG00000099889.14	ARVCF	22:19970264:C:T	2.22842e-05	2.19217e-05	1.82043e-05	2.86918e-05	1.87788e-05	22:19970264:C:T-ENSG00000099889.14	0.570861	0.570884	0.57096	0.570928	0.570961	0.243277	0.226143	0.164208	0.211538	0.186354
ENSG00000104763.20	ASAH1	8:18064887:T:C	1.17528e-07	3.99977e-09	1.61912e-10	2.01141e-07	2.00797e-07	8:18064887:T:C-ENSG00000104763.20	-0.387269	-0.387516	-0.387926	-0.387503	-0.387769	0.104615	0.0903052	0.0743393	0.0908835	0.124971
ENSG00000204147.11	ASAH2B	10:50757099:G:T	0.00835439	0.0096884	0.00923556	0.0108859	0.0103953	10:50757099:G:T-ENSG00000204147.11	-0.343318	-0.342882	-0.343813	-0.342785	-0.342998	0.167884	0.198424	0.168137	0.195951	0.21803
ENSG00000065802.12	ASB1	2:238448336:C:G	0.0121695	0.021671	0.0235006	0.0242817	0.0227666	2:238448336:C:G-ENSG00000065802.12	0.248255	0.244959	0.245333	0.245056	0.245782	0.143634	0.131415	0.131881	0.154587	0.195771
ENSG00000267080.8	ASB16-AS1	17:44176151:T:C	3.77944e-05	3.58171e-05	1.60206e-05	1.62291e-05	8.83366e-06	17:44176151:T:C-ENSG00000267080.8	-0.454426	-0.454539	-0.454829	-0.454905	-0.455029	0.157927	0.175067	0.135908	0.146915	0.150349
ENSG00000177981.11	ASB8	12:48147974:A:G	1.41966e-06	3.17017e-06	3.16645e-06	2.31961e-06	2.21452e-06	12:48147974:A:G-ENSG00000177981.11	0.426954	0.426934	0.426987	0.427181	0.427125	0.127038	0.173561	0.123178	0.13528	0.11849
ENSG00000183734.5	ASCL2	11:2286192:G:T	0.279537	0.306021	0.0451016	0.276314	0.23314	11:2286192:G:T-ENSG00000183734.5	0.103783	0.0975182	0.220223	0.104574	0.119068	0.119771	0.130578	0.130392	0.143428	0.125336
ENSG00000105011.9	ASF1B	19:14122536:T:G	0.0574968	0.0662051	0.0602404	0.0475478	0.033113	19:14122536:T:G-ENSG00000105011.9	0.332823	0.329605	0.331211	0.337604	0.342696	0.277798	0.340431	0.261339	0.230851	0.201454
ENSG00000161944.17	ASGR2	17:7114639:A:G	1.32641e-05	1.63957e-05	1.06767e-05	8.52176e-06	1.10496e-05	17:7114639:A:G-ENSG00000161944.17	0.366307	0.366448	0.366735	0.367225	0.366963	0.119049	0.14045	0.103698	0.121857	0.133676
ENSG00000110881.12	ASIC1	12:50096316:C:G	0.00375473	0.00366883	0.00391502	0.00378209	0.0030328	12:50096316:C:G-ENSG00000110881.12	0.45032	0.450482	0.450474	0.450567	0.45092	0.229804	0.232828	0.219543	0.19168	0.230404
ENSG00000138381.10	ASNSD1	2:189661479:C:T	1.42354e-08	4.32272e-09	1.90862e-10	7.1911e-08	1.51836e-07	2:189661479:C:T-ENSG00000138381.10	0.62813	0.628139	0.628165	0.628147	0.628154	0.177232	0.163812	0.131346	0.134799	0.179889
ENSG00000128203.7	ASPHD2	22:26452004:G:A	0.00741462	0.00643894	0.016162	0.0145206	0.0128473	22:26452004:G:A-ENSG00000128203.7	0.186398	0.187099	0.184423	0.185447	0.186154	0.0829243	0.0867394	0.108032	0.130136	0.134662
ENSG00000169696.16	ASPSCR1	17:82001793:C:T	0.000117478	0.00017599	0.000107365	1.31218e-05	0.000107404	17:82001793:C:T-ENSG00000169696.16	0.227681	0.227253	0.227468	0.228679	0.228434	0.132367	0.106565	0.0773382	0.0543606	0.128896
ENSG00000156802.13	ATAD2	8:123463881:T:C	0.00767165	0.133278	0.0195319	0.201811	0.364801	8:123463881:T:C-ENSG00000156802.13	-0.2139	-0.11678	-0.178137	0.133363	0.0427327	0.0846233	0.126854	0.0728681	0.124212	0.140336
ENSG00000197785.14	ATAD3A	1:1500729:G:A	0.490046	0.352168	0.555608	0.651481	0.0153136	1:1500729:G:A-ENSG00000197785.14	-0.059643	-0.153756	0.0352141	-0.0038149	-0.473737	0.189859	0.155738	0.160228	0.144986	0.16929
ENSG00000160072.20	ATAD3B	1:1511356:T:C	0.000600407	0.00057667	0.000489341	0.000471715	0.000584283	1:1511356:T:C-ENSG00000160072.20	-0.706247	-0.706277	-0.706365	-0.706382	-0.706284	0.507556	0.44541	0.252285	0.271635	0.311877
ENSG00000226864.3	ATE1OSP	10:121889076:C:T	0.00375694	0.00539862	0.00367239	0.00531881	0.00379694	10:121889076:C:T-ENSG00000226864.3	-0.397429	-0.396537	-0.398064	-0.396823	-0.39772	0.192091	0.218848	0.167876	0.20438	0.196418
ENSG00000123268.9	ATF1	12:50733955:T:C	0.0259789	0.030273	0.0196711	0.0242689	0.0271044	12:50733955:T:C-ENSG00000123268.9	-0.182334	-0.181334	-0.185882	-0.183484	-0.182721	0.106133	0.126849	0.111484	0.11386	0.15507
ENSG00000169136.13	ATF5	19:49971292:G:C	0.0475242	0.0197032	0.0229787	0.00330158	0.0459149	19:49971292:G:C-ENSG00000169136.13	0.213873	0.223865	0.2231	0.23947	0.215096	0.133824	0.096476	0.124911	0.10274	0.195399
ENSG00000118217.7	ATF6	1:161792834:G:A	0.012325	0.0153636	0.0153713	0.0151082	0.015863	1:161792834:G:A-ENSG00000118217.7	0.275353	0.274407	0.274932	0.275121	0.274725	0.161795	0.177754	0.135174	0.161752	0.180684
ENSG00000166669.14	ATF7IP2	16:10353240:A:G	0.324286	0.0918278	0.003047	0.0274033	0.429771	16:10353240:A:G-ENSG00000166669.14	-0.0679483	-0.105633	-0.186733	-0.158254	-0.0185903	0.094171	0.0726375	0.0663864	0.087904	0.109264
ENSG00000145782.13	ATG12	5:115842992:A:AG	0.0348958	0.295576	0.563915	0.592318	0.619	5:115842992:A:AG-ENSG00000145782.13	0.241346	0.112347	0.0412363	0.0263866	0.0178084	0.131515	0.140819	0.160695	0.14425	0.138502
ENSG00000066739.12	ATG2B	14:96351902:C:CA	0.356537	0.374889	0.361686	0.386184	0.0358045	14:96351902:C:CA-ENSG00000066739.12	0.110974	0.108055	0.110411	0.103661	0.210502	0.163467	0.166878	0.176845	0.162261	0.117176
ENSG00000168397.17	ATG4B	2:241665039:A:G	8.9832e-05	3.41201e-05	9.28285e-07	4.87824e-07	3.76169e-11	2:241665039:A:G-ENSG00000168397.17	-0.398876	-0.399056	-0.399362	-0.399771	-0.400615	0.153915	0.129568	0.0852332	0.0855811	0.0760732
ENSG00000197548.13	ATG7	3:11279938:GT:G	0.00680799	0.00773692	0.00692514	0.00695417	0.00115529	3:11279938:GT:G-ENSG00000197548.13	-0.192577	-0.192052	-0.192825	-0.192987	-0.194983	0.0984105	0.12234	0.0959354	0.100555	0.0675765
ENSG00000198925.12	ATG9A	2:219257342:CT:C	0.00162282	0.00129968	0.00144877	0.00146905	0.00133405	2:219257342:CT:C-ENSG00000198925.12	0.423864	0.424239	0.424284	0.424248	0.424396	0.252609	0.179718	0.171814	0.160936	0.228932
ENSG00000184743.13	ATL3	11:63639590:CA:C	0.0193418	0.0151458	0.0123977	0.00234011	0.0196047	11:63639590:CA:C-ENSG00000184743.13	-0.334566	-0.336527	-0.338225	-0.346487	-0.334737	0.224594	0.189228	0.14991	0.132393	0.17384
ENSG00000149311.20	ATM	11:108212074:TA:T	0.448719	0.468836	0.456387	0.468763	0.0391344	11:108212074:TA:T-ENSG00000149311.20	0.0642382	0.0613477	0.062948	0.060771	0.156562	0.102334	0.122132	0.110233	0.109187	0.0894173
ENSG00000166454.10	ATMIN	16:81005161:G:A	0.029371	0.734989	0.682558	0.757375	0.573414	16:81005161:G:A-ENSG00000166454.10	0.346794	-0.0158106	-0.0254054	-0.000661018	-0.07173	0.139752	0.167505	0.178763	0.193511	0.142552
ENSG00000111676.15	ATN1	12:6937980:C:A	0.0686623	0.0498833	0.073921	0.0731552	0.0651827	12:6937980:C:A-ENSG00000111676.15	-0.15108	-0.155801	-0.151076	-0.15097	-0.152372	0.204985	0.112374	0.12307	0.104417	0.135967
ENSG00000168874.13	ATOH8	2:85770358:A:G	2.41975e-06	3.61246e-06	4.05007e-06	5.23219e-06	4.13274e-06	2:85770358:A:G-ENSG00000168874.13	0.57456	0.574555	0.574596	0.574602	0.574619	0.172805	0.171058	0.180299	0.192088	0.214798
ENSG00000047346.13	ATOSA	15:52679756:TCTCCTCCTC:T	0.000429591	0.00126265	0.000971547	0.00105793	0.00130717	15:52679756:TCTCCTCCTC:T-ENSG00000047346.13	0.452764	0.452156	0.452628	0.45253	0.452412	0.158354	0.202048	0.176495	0.187138	0.261693
ENSG00000177556.12	ATOX1	5:151808597:T:C	0.00286108	0.00261483	0.00234283	0.00146423	0.00193635	5:151808597:T:C-ENSG00000177556.12	-0.203844	-0.204411	-0.204539	-0.205795	-0.205249	0.116261	0.113228	0.0999066	0.073169	0.102249
ENSG00000206190.13	ATP10A	15:25840330:C:T	0.0156476	0.0151887	0.0152015	0.00507104	0.0140023	15:25840330:C:T-ENSG00000206190.13	0.225446	0.22562	0.225977	0.231471	0.22602	0.163668	0.124581	0.156452	0.10886	0.100894
ENSG00000105726.17	ATP13A1	19:19685811:G:A	0.00774807	0.00741172	0.00692771	0.00499926	0.00674259	19:19685811:G:A-ENSG00000105726.17	0.292449	0.292828	0.292988	0.294384	0.293165	0.220952	0.184269	0.140517	0.122946	0.15196
ENSG00000159363.19	ATP13A2	1:17023460:G:A	0.355738	0.252513	0.150807	0.27191	0.0416594	1:17023460:G:A-ENSG00000159363.19	-0.0561504	-0.0818692	-0.115581	-0.0731018	-0.145526	0.105295	0.12078	0.0903553	0.0872845	0.0955318
ENSG00000133657.17	ATP13A3	3:194483426:C:CAAAAAAAAA	0.00909607	0.00917695	0.00902471	0.00899925	0.00737012	3:194483426:C:CAAAAAAAAA-ENSG00000133657.17	0.403629	0.403757	0.403973	0.403939	0.404436	0.232731	0.284613	0.22232	0.200941	0.189376
ENSG00000069849.11	ATP1B3	3:141925966:G:T	0.101935	0.0967871	0.0862313	0.0888528	0.0387425	3:141925966:G:T-ENSG00000069849.11	-0.144785	-0.146971	-0.148443	-0.147703	-0.157812	0.11774	0.163834	0.118519	0.145491	0.101562
ENSG00000166896.9	ATP23	12:57912861:CAT:C	4.02779e-05	3.69597e-05	2.33523e-05	8.08709e-06	2.16765e-05	12:57912861:CAT:C-ENSG00000166896.9	-0.524443	-0.524504	-0.524624	-0.524788	-0.524671	0.190443	0.212875	0.184793	0.145377	0.172264
ENSG00000152234.16	ATP5F1A	18:46094334:A:G	0.0891695	0.0168803	0.0970525	0.0994076	0.0806585	18:46094334:A:G-ENSG00000152234.16	-0.139658	-0.157981	-0.139268	-0.138866	-0.141831	0.118826	0.0799053	0.105418	0.11663	0.0931493
ENSG00000110955.9	ATP5F1B	12:56691792:AT:A	0.06816	0.136373	0.00402683	0.118705	0.367381	12:56691792:AT:A-ENSG00000110955.9	-0.181119	-0.141484	-0.245152	-0.149417	-0.077959	0.101937	0.118533	0.0840889	0.121215	0.107562
ENSG00000165629.20	ATP5F1C	10:7823733:T:C	0.501534	0.289716	0.50205	0.44208	0.0398698	10:7823733:T:C-ENSG00000165629.20	0.0268131	0.0673735	0.0281672	0.038062	0.115561	0.0795677	0.0632416	0.0944622	0.0794684	0.066656
ENSG00000099624.8	ATP5F1D	19:1255254:C:T	0.377632	0.370672	0.0309503	0.402668	0.222566	19:1255254:C:T-ENSG00000099624.8	-0.0340965	-0.02775	-0.1429	-0.0202907	0.0795296	0.0781545	0.0718547	0.0521517	0.0534239	0.0685186
ENSG00000124172.10	ATP5F1E	20:59036074:T:TGGGGGAGAC	0.0502388	0.0455721	0.0428908	0.0442085	0.0295914	20:59036074:T:TGGGGGAGAC-ENSG00000124172.10	0.209026	0.210802	0.211525	0.210894	0.21452	0.256037	0.135628	0.140806	0.151719	0.145363
ENSG00000130770.18	ATP5IF1	1:28209700:G:A	0.00121418	0.00031214	0.0001586	0.00107403	1.95468e-05	1:28209700:G:A-ENSG00000130770.18	-0.389727	-0.390554	-0.39152	-0.390232	-0.392	0.168241	0.151993	0.125763	0.150054	0.110384
ENSG00000167863.12	ATP5PD	17:75086690:G:C	0.0881412	0.0348046	0.0860161	0.0737189	0.0682294	17:75086690:G:C-ENSG00000167863.12	0.164919	0.182335	0.166757	0.169993	0.1706	0.146045	0.122291	0.159065	0.105784	0.14642
ENSG00000205464.13	ATP6AP1L	5:82275850:C:T	2.88658e-15	0	3.91758e-11	2.22045e-16	9.26064e-11	5:82275850:C:T-ENSG00000205464.13	-0.893136	-0.893136	-0.893136	-0.893136	-0.893136	0.153327	0.130803	0.159669	0.137486	0.196341
ENSG00000033627.18	ATP6V0A1	17:42487738:A:T	0.0369783	0.163101	0.143698	0.145487	0.159262	17:42487738:A:T-ENSG00000033627.18	-0.170455	-0.133667	-0.139479	-0.139853	-0.137413	0.11746	0.139138	0.0932639	0.15441	0.159717
ENSG00000159720.13	ATP6V0D1	16:67442669:A:G	2.0961e-13	6.51225e-07	1.11022e-16	6.49748e-08	1.94511e-13	16:67442669:A:G-ENSG00000159720.13	-0.481792	-0.481661	-0.481938	-0.481902	-0.482092	0.0784071	0.11006	0.0642886	0.116645	0.0998682
ENSG00000171130.19	ATP6V0E2	7:149871173:A:G	0.00267307	0.00370969	0.00197906	0.00100016	0.0020098	7:149871173:A:G-ENSG00000171130.19	-0.210675	-0.210015	-0.213103	-0.215938	-0.21361	0.0851555	0.0868662	0.0982363	0.101979	0.126232
ENSG00000204934.10	ATP6V0E2-AS1	7:149850374:C:A	0.00331025	0.00856747	0.00197716	0.00146326	0.00332503	7:149850374:C:A-ENSG00000204934.10	-0.576614	-0.573742	-0.578272	-0.579849	-0.576745	0.301373	0.271706	0.229116	0.257181	0.337245
ENSG00000155097.12	ATP6V1C1	8:102992400:T:C	1.17913e-07	5.21695e-06	2.12177e-06	1.51669e-06	3.07742e-05	8:102992400:T:C-ENSG00000155097.12	-0.590915	-0.59087	-0.590918	-0.590941	-0.590898	0.14038	0.180315	0.177319	0.164632	0.267024
ENSG00000100554.12	ATP6V1D	14:67325650:G:A	5.30486e-10	4.06415e-12	5.50999e-13	4.26532e-10	7.80879e-10	14:67325650:G:A-ENSG00000100554.12	0.532393	0.532467	0.532545	0.532547	0.532547	0.100912	0.102171	0.103761	0.135504	0.138895
ENSG00000250565.7	ATP6V1E2	2:46541420:G:A	0.000217476	0.0015246	0.000635253	2.18481e-05	0.00291387	2:46541420:G:A-ENSG00000250565.7	0.551593	0.549799	0.550486	0.552533	0.549273	0.193336	0.213701	0.203639	0.157179	0.223885
ENSG00000124406.17	ATP8A1	4:42706918:T:C	0.032529	0.0360036	0.0457047	0.036345	0.0189919	4:42706918:T:C-ENSG00000124406.17	0.237902	0.236882	0.233524	0.237262	0.244149	0.147841	0.164183	0.1439	0.155366	0.156247
ENSG00000143515.20	ATP8B2	1:154319844:G:A	0.0187458	0.0181806	0.00734292	0.00750112	0.00847771	1:154319844:G:A-ENSG00000143515.20	0.125122	0.125728	0.129212	0.128686	0.128721	0.0852269	0.0820092	0.0576078	0.0595304	0.107158
ENSG00000130270.16	ATP8B3	19:1806084:A:C	0.00286821	0.00249173	0.00235219	0.00614239	0.00312553	19:1806084:A:C-ENSG00000130270.16	-0.365673	-0.366394	-0.36796	-0.364527	-0.36605	0.157161	0.155664	0.194111	0.181548	0.177323
ENSG00000166377.21	ATP9B	18:79106198:A:G	0.0264415	0.0384628	0.0271437	0.0465559	0.0484462	18:79106198:A:G-ENSG00000166377.21	-0.219792	-0.214606	-0.221544	-0.212618	-0.212069	0.143884	0.170559	0.1179	0.155383	0.156152
ENSG00000123472.13	ATPAF1	1:46720490:AAAATAAATA:A	0.0394813	0.0881075	0.0981862	0.0949241	0.0900359	1:46720490:AAAATAAATA:A-ENSG00000123472.13	-0.264044	-0.246885	-0.2457	-0.246574	-0.248446	0.173986	0.197739	0.208701	0.193384	0.233524
ENSG00000124788.19	ATXN1	6:16742721:C:T	0.023459	0.023291	0.0235042	0.0233623	0.00359985	6:16742721:C:T-ENSG00000124788.19	0.166313	0.166493	0.166564	0.166696	0.171434	0.114789	0.0969805	0.0986862	0.0934076	0.0674747
ENSG00000066427.25	ATXN3	14:92068664:T:C	4.83286e-06	1.02858e-05	7.33344e-06	9.46761e-06	9.82724e-06	14:92068664:T:C-ENSG00000066427.25	0.555116	0.555079	0.555159	0.55514	0.555161	0.210982	0.196612	0.168537	0.154342	0.20264
ENSG00000162650.17	ATXN7L2	1:109488273:GTC:G	0.0505337	0.0533637	0.0502731	0.0513006	0.0148277	1:109488273:GTC:G-ENSG00000162650.17	-0.22823	-0.227818	-0.228802	-0.228425	-0.237131	0.165279	0.20583	0.19913	0.17537	0.105063
ENSG00000087152.16	ATXN7L3	17:44221932:A:G	0.0207635	0.017484	0.0216432	0.0223187	0.0204157	17:44221932:A:G-ENSG00000087152.16	0.240294	0.24169	0.240822	0.240598	0.241087	0.159185	0.145681	0.124983	0.163231	0.173662
ENSG00000148090.12	AUH	9:91314346:C:T	0.625151	0.598758	0.647778	0.0160628	0.73792	9:91314346:C:T-ENSG00000148090.12	0.050122	-0.0609334	0.0310521	-0.366619	-0.0029725	0.171706	0.207989	0.123676	0.107729	0.116658
ENSG00000135407.11	AVIL	12:57834805:C:G	0.00016519	0.000153569	5.59013e-05	0.000150381	0.000120829	12:57834805:C:G-ENSG00000135407.11	0.34404	0.344193	0.345121	0.344645	0.344705	0.143536	0.135929	0.102714	0.143323	0.120882
ENSG00000105778.20	AVL9	7:32527305:G:A	0.756164	0.694532	0.752177	0.784849	0.00892536	7:32527305:G:A-ENSG00000105778.20	0.0101305	-0.0340859	0.0112482	-0.00526206	0.192937	0.115035	0.117085	0.101815	0.111586	0.066363
ENSG00000103126.15	AXIN1	16:324126:G:A	0.030599	0.0291357	0.0304535	0.0231563	0.0334993	16:324126:G:A-ENSG00000103126.15	-0.220547	-0.221057	-0.22128	-0.225023	-0.219767	0.173378	0.121689	0.162061	0.155284	0.145108
ENSG00000168646.14	AXIN2	17:65524990:C:CT	0.00157737	0.00755675	0.00974626	0.00832091	0.0108098	17:65524990:C:CT-ENSG00000168646.14	-0.260606	-0.258001	-0.257336	-0.258523	-0.257341	0.104259	0.119934	0.121858	0.115254	0.188455
ENSG00000172232.10	AZU1	19:808920:C:T	0.00829502	0.00902682	0.00911329	0.0101105	0.0102276	19:808920:C:T-ENSG00000172232.10	-0.351874	-0.3516	-0.352314	-0.351587	-0.351511	0.193074	0.16964	0.183994	0.19318	0.225821
ENSG00000166710.23	B2M	15:44732481:G:A	0.00280173	0.00267462	0.00238239	0.00236689	0.001899	15:44732481:G:A-ENSG00000166710.23	0.25039	0.250697	0.251764	0.251786	0.251856	0.121824	0.106378	0.136795	0.14222	0.106904
ENSG00000162885.14	B3GALNT2	1:235489470:C:CT	0.00244885	0.00257169	0.00242193	0.00252194	0.00255444	1:235489470:C:CT-ENSG00000162885.14	-0.503368	-0.503361	-0.503595	-0.503517	-0.50349	0.264449	0.259445	0.195242	0.225626	0.313134
ENSG00000176022.7	B3GALT6	1:1232416:C:T	0.00632843	0.433758	0.578116	0.470676	0.369089	1:1232416:C:T-ENSG00000176022.7	-0.619537	-0.14392	-0.0722588	-0.126172	-0.18191	0.216064	0.324939	0.290324	0.25994	0.333989
ENSG00000109956.13	B3GAT1	11:134364512:A:T	0.04504	0.0482339	0.0459447	0.0457597	0.048014	11:134364512:A:T-ENSG00000109956.13	0.306733	0.305983	0.307215	0.306929	0.305989	0.251295	0.250781	0.216012	0.220364	0.221414
ENSG00000255545.8	B3GAT1-DT	11:134445350:C:T	0.00730663	0.00804271	0.00779686	0.00628799	0.00777824	11:134445350:C:T-ENSG00000255545.8	0.44915	0.448875	0.449134	0.450105	0.44909	0.25389	0.240529	0.249367	0.217584	0.23093
ENSG00000149541.10	B3GAT3	11:62601546:C:G	0.0315798	0.214959	0.231961	0.19283	0.25536	11:62601546:C:G-ENSG00000149541.10	0.181572	0.111663	0.107512	0.120355	0.102434	0.126605	0.132637	0.0987614	0.0849015	0.122194
ENSG00000177191.3	B3GNT8	19:41433930:C:T	0.033266	0.77946	0.831395	0.850938	0.847075	19:41433930:C:T-ENSG00000177191.3	0.180915	0.00979441	0.00647049	0.00214413	0.00350189	0.0703974	0.0901669	0.0773565	0.107032	0.121075
ENSG00000175711.9	B3GNTL1	17:83035056:A:C	0.0268449	0.0338212	0.0245447	0.0255685	0.0213669	17:83035056:A:C-ENSG00000175711.9	-0.251591	-0.249087	-0.252861	-0.251957	-0.253295	0.183007	0.181472	0.160473	0.160363	0.141346
ENSG00000139044.12	B4GALNT3	12:442384:G:A	0.00829538	0.0080777	0.00962025	0.00909775	0.00881536	12:442384:G:A-ENSG00000139044.12	0.429652	0.429863	0.429547	0.429812	0.429798	0.220434	0.222166	0.236391	0.241091	0.247719
ENSG00000182272.12	B4GALNT4	11:378405:T:C	0.00416862	0.00461558	0.00408367	0.0032614	0.00423558	11:378405:T:C-ENSG00000182272.12	0.354448	0.354271	0.354844	0.355495	0.354777	0.191552	0.178942	0.185728	0.139055	0.202238
ENSG00000086062.13	B4GALT1	9:33132136:A:G	0.000198436	3.33729e-05	2.96344e-05	0.000186694	3.43541e-05	9:33132136:A:G-ENSG00000086062.13	0.3578	0.358519	0.35882	0.358251	0.358711	0.154379	0.130348	0.10411	0.136451	0.11607
ENSG00000158850.15	B4GALT3	1:161128338:C:T	0.170721	0.166575	0.15314	0.00802495	0.206501	1:161128338:C:T-ENSG00000158850.15	-0.149431	-0.150622	-0.155953	-0.217307	-0.140246	0.132073	0.125691	0.129547	0.0870974	0.11105
ENSG00000158470.5	B4GALT5	20:49740392:AT:A	0.0139908	0.012927	0.0153377	0.0095608	0.00295099	20:49740392:AT:A-ENSG00000158470.5	0.332041	0.332837	0.332132	0.336148	0.339345	0.157672	0.169209	0.229186	0.171726	0.143973
ENSG00000027847.14	B4GALT7	5:177632129:T:G	1.03251e-14	4.32758e-08	5.53971e-07	9.10704e-08	4.81933e-07	5:177632129:T:G-ENSG00000027847.14	-0.56426	-0.564207	-0.564213	-0.564244	-0.564224	0.0888956	0.125857	0.129757	0.133176	0.124754
ENSG00000151929.10	BAG3	10:119657099:T:C	0.0327793	0.033799	0.0252664	0.0214358	0.0288691	10:119657099:T:C-ENSG00000151929.10	0.289947	0.289857	0.292793	0.294153	0.290984	0.253241	0.207632	0.187938	0.141656	0.261953
ENSG00000204463.14	BAG6	6:31663223:C:CAAA	0.0059355	0.0059698	0.00542991	0.0059589	0.00367781	6:31663223:C:CAAA-ENSG00000204463.14	-0.279999	-0.279976	-0.280924	-0.280484	-0.281303	0.179023	0.13258	0.162362	0.197003	0.10953
ENSG00000140320.12	BAHD1	15:40418562:AGCCCACCTC:A	0.00190215	0.00375704	0.00190435	0.00228165	0.00336912	15:40418562:AGCCCACCTC:A-ENSG00000140320.12	-0.410816	-0.409813	-0.411159	-0.410826	-0.410342	0.180534	0.293974	0.139866	0.197922	0.312913
ENSG00000175866.16	BAIAP2	17:81030471:T:C	3.56866e-06	1.94315e-06	2.95828e-06	3.38321e-06	3.01811e-06	17:81030471:T:C-ENSG00000175866.16	0.5551	0.555151	0.555189	0.555191	0.555199	0.209906	0.147883	0.197832	0.17166	0.177501
ENSG00000226137.5	BAIAP2-DT	17:81032233:G:A	3.80197e-06	3.02987e-06	5.9085e-06	1.10613e-05	3.70901e-06	17:81032233:G:A-ENSG00000226137.5	0.521591	0.521626	0.52166	0.521664	0.521713	0.181268	0.13751	0.193083	0.199083	0.15606
ENSG00000007516.14	BAIAP3	16:1324817:A:G	1.61255e-09	7.3048e-10	1.24065e-08	3.86066e-09	2.86636e-07	16:1324817:A:G-ENSG00000007516.14	-0.607526	-0.607534	-0.607544	-0.607558	-0.607546	0.161138	0.127754	0.155684	0.151106	0.175459
ENSG00000030110.14	BAK1	6:33572915:T:A	9.25409e-10	1.73905e-12	1.83239e-10	2.7333e-10	5.34656e-11	6:33572915:T:A-ENSG00000030110.14	-0.54413	-0.544207	-0.544206	-0.544275	-0.544288	0.106908	0.1079	0.102032	0.14547	0.14619
ENSG00000095739.11	BAMBI	10:28652932:C:T	0.0879554	0.0330436	0.099367	0.0936629	0.0932515	10:28652932:C:T-ENSG00000095739.11	0.195527	0.215731	0.193892	0.195809	0.195073	0.13793	0.146324	0.149417	0.164329	0.176635
ENSG00000175334.8	BANF1	11:65962746:G:A	0.121218	0.200952	0.137335	0.0452296	0.22195	11:65962746:G:A-ENSG00000175334.8	-0.0972097	-0.0793439	-0.0897948	-0.118979	-0.0756476	0.108531	0.0960493	0.073839	0.0723851	0.0938662
ENSG00000172530.22	BANP	16:87996832:T:A	0.042803	0.818746	0.810889	0.731857	0.76934	16:87996832:T:A-ENSG00000172530.22	-0.215964	0.00374039	-0.00290394	-0.020109	0.00941543	0.0919469	0.119052	0.110151	0.109733	0.102809
ENSG00000215196.5	BASP1-AS1	5:17220093:A:T	0.000806522	0.000439326	0.000694593	0.000774129	0.00144158	5:17220093:A:T-ENSG00000215196.5	0.246355	0.247326	0.247554	0.247248	0.246622	0.101494	0.0867831	0.105171	0.105466	0.143725
ENSG00000168062.10	BATF2	11:65033544:CA:C	0.00704532	0.00692079	0.00604779	0.00693496	0.00803883	11:65033544:CA:C-ENSG00000168062.10	-0.164509	-0.165313	-0.166719	-0.165932	-0.165003	0.074502	0.0964744	0.0844457	0.103132	0.0994616
ENSG00000123685.9	BATF3	1:212725840:A:T	0.0178929	0.0144503	0.0144693	0.0121182	0.0180803	1:212725840:A:T-ENSG00000123685.9	0.254354	0.256128	0.256387	0.257777	0.254667	0.155473	0.144658	0.147233	0.133836	0.178762
ENSG00000087088.21	BAX	19:48956819:CTTTTTT:C	0.000231502	0.000754959	0.000230183	0.000161327	3.41493e-05	19:48956819:CTTTTTT:C-ENSG00000087088.21	-0.219165	-0.218105	-0.218832	-0.220626	-0.22256	0.0880212	0.0915446	0.0673896	0.0676669	0.102125
ENSG00000123636.19	BAZ2B	2:159590452:G:A	0.000162181	0.0011001	5.08144e-05	6.75113e-05	0.00015254	2:159590452:G:A-ENSG00000123636.19	0.172123	0.16988	0.173292	0.173179	0.172575	0.0794162	0.0703609	0.051192	0.0601868	0.0683338
ENSG00000224152.3	BAZ2B-AS1	2:159601579:G:A	5.36678e-08	4.46116e-07	1.5146e-07	2.08291e-07	1.697e-07	2:159601579:G:A-ENSG00000224152.3	0.425266	0.425126	0.425287	0.425363	0.425447	0.125902	0.122248	0.101434	0.1112	0.131844
ENSG00000105327.18	BBC3	19:47276586:G:A	0.0341354	0.021069	0.0129553	0.00360169	0.00200033	19:47276586:G:A-ENSG00000105327.18	-0.241029	-0.245954	-0.248786	-0.258784	-0.260977	0.129716	0.143545	0.139456	0.0955735	0.116788
ENSG00000107949.17	BCCIP	10:125796388:G:T	0.481991	0.322936	0.588042	0.0488057	0.421225	10:125796388:G:T-ENSG00000107949.17	0.0614228	0.128847	0.013067	0.351162	0.0839745	0.264091	0.1745	0.208229	0.164055	0.200728
ENSG00000142867.14	BCL10	1:85253927:T:C	0.0511396	0.0122097	0.0537905	0.0630903	0.0374709	1:85253927:T:C-ENSG00000142867.14	0.282091	0.300847	0.282599	0.279125	0.289622	0.17779	0.134366	0.194846	0.21192	0.209463
ENSG00000127152.18	BCL11B	14:99285600:C:T	0.033317	0.0504956	0.0447011	0.0299503	0.0452863	14:99285600:C:T-ENSG00000127152.18	-0.122372	-0.118258	-0.120388	-0.124378	-0.120305	0.0771642	0.0839527	0.120005	0.0763128	0.089509
ENSG00000153094.24	BCL2L11	2:111137967:C:G	0.031499	0.168817	0.18338	0.170099	0.178757	2:111137967:C:G-ENSG00000153094.24	0.211445	0.164463	0.162486	0.167027	0.163849	0.136871	0.147724	0.147393	0.152641	0.144577
ENSG00000069399.15	BCL3	19:44743884:G:C	0.0520955	0.0472948	0.0435659	0.0401416	0.0423636	19:44743884:G:C-ENSG00000069399.15	-0.194878	-0.196918	-0.197306	-0.198554	-0.197455	0.165409	0.158287	0.117452	0.143314	0.214978
ENSG00000113916.18	BCL6	3:187776389:T:C	0.155034	0.209467	0.138088	0.0346885	0.196437	3:187776389:T:C-ENSG00000113916.18	-0.137137	-0.122457	-0.143257	-0.189411	-0.125702	0.12992	0.151174	0.137261	0.103829	0.136796
ENSG00000106635.8	BCL7B	7:73559524:C:A	0.33524	0.0140982	0.238666	0.181097	0.532083	7:73559524:C:A-ENSG00000106635.8	0.118204	-0.452612	0.125678	0.190421	0.00263788	0.198395	0.163746	0.19222	0.184841	0.189795
ENSG00000197580.13	BCO2	11:112221717:A:G	0.482484	0.566717	0.0330896	0.545571	0.494615	11:112221717:A:G-ENSG00000197580.13	0.0686653	0.0317308	0.475613	-0.0454627	0.063247	0.24269	0.318335	0.18628	0.266678	0.258337
ENSG00000164039.15	BDH2	4:103116231:G:A	0.0335796	0.0357635	0.0429245	0.0133583	0.0433133	4:103116231:G:A-ENSG00000164039.15	0.277869	0.276762	0.274412	0.294549	0.274343	0.149063	0.151278	0.185719	0.178266	0.207023
ENSG00000126581.13	BECN1	17:42808235:C:T	1.8559e-06	6.37732e-07	5.52941e-07	3.84226e-07	6.52848e-06	17:42808235:C:T-ENSG00000126581.13	0.545346	0.545376	0.545453	0.545517	0.545437	0.192166	0.140089	0.149964	0.158289	0.197771
ENSG00000183092.18	BEGAIN	14:100615298:G:A	0.00902093	0.00867183	0.00855664	0.00866214	0.00698783	14:100615298:G:A-ENSG00000183092.18	-0.419587	-0.419873	-0.420041	-0.419995	-0.420542	0.262941	0.231494	0.194278	0.235524	0.221222
ENSG00000167995.17	BEST1	11:61904484:A:G	0.0112542	0.00705668	0.00172266	0.00291257	0.020548	11:61904484:A:G-ENSG00000167995.17	0.195919	0.196689	0.200485	0.199815	0.192426	0.187045	0.12796	0.0675	0.0926893	0.101929
ENSG00000177951.18	BET1L	11:224845:G:C	0.000392711	0.000378303	0.000393303	0.000326304	0.000350946	11:224845:G:C-ENSG00000177951.18	0.637506	0.637536	0.637561	0.637657	0.637603	0.316983	0.241393	0.275672	0.26499	0.260639
ENSG00000180535.4	BHLHA15	7:98244682:G:A	0.0492037	0.0715143	0.0924958	0.0896242	0.0958229	7:98244682:G:A-ENSG00000180535.4	-0.327431	-0.317416	-0.312508	-0.313094	-0.310243	0.233546	0.255483	0.308338	0.260344	0.277088
ENSG00000151746.15	BICD1	12:32117713:C:T	0.118819	0.0225482	0.099357	0.108994	0.0975448	12:32117713:C:T-ENSG00000151746.15	-0.177825	-0.209238	-0.185965	-0.182529	-0.183757	0.14063	0.107788	0.140462	0.179724	0.161083
ENSG00000185963.14	BICD2	9:92746149:A:G	0.00345372	0.0033021	0.00376369	0.0031953	0.00633562	9:92746149:A:G-ENSG00000185963.14	0.341223	0.34121	0.341335	0.342452	0.339883	0.198707	0.139676	0.163771	0.180892	0.159684
ENSG00000162069.16	BICDL2	16:3037379:C:A	1.45255e-23	3.19382e-21	1.36843e-18	8.40594e-16	3.05907e-19	16:3037379:C:A-ENSG00000162069.16	0.899207	0.899207	0.899207	0.899207	0.899207	0.107152	0.127981	0.127629	0.142673	0.137685
ENSG00000015475.19	BID	22:17789177:G:A	0.0453834	0.0496954	0.0369806	0.0384836	0.0385756	22:17789177:G:A-ENSG00000015475.19	-0.245282	-0.244147	-0.248932	-0.247591	-0.246993	0.195755	0.167612	0.185756	0.192523	0.166646
ENSG00000136717.15	BIN1	2:127074772:G:A	0.002695	0.00251284	0.0024255	0.00164055	0.00224774	2:127074772:G:A-ENSG00000136717.15	0.357537	0.357717	0.358001	0.358913	0.358194	0.220435	0.152665	0.17535	0.140922	0.165452
ENSG00000110934.13	BIN2	12:51313229:A:C	0.0724526	0.0681931	0.0393947	0.0396313	0.0201625	12:51313229:A:C-ENSG00000110934.13	0.224491	0.227625	0.235645	0.236742	0.246324	0.264022	0.184661	0.119717	0.164035	0.16761
ENSG00000147439.14	BIN3	8:22626336:T:C	0.00169456	7.73455e-05	0.00150086	0.00152259	0.00111691	8:22626336:T:C-ENSG00000147439.14	0.202392	0.205414	0.20298	0.202859	0.204859	0.0912935	0.0657514	0.076723	0.0705529	0.0864246
ENSG00000110330.10	BIRC2	11:102381814:T:G	0.017617	0.0191326	0.0206797	0.0193985	0.0167891	11:102381814:T:G-ENSG00000110330.10	-0.445135	-0.444772	-0.444489	-0.444967	-0.445653	0.231836	0.314413	0.334648	0.308835	0.246095
ENSG00000023445.16	BIRC3	11:102352094:G:C	0.0041084	0.00491982	0.00492508	0.00493613	0.00478536	11:102352094:G:C-ENSG00000023445.16	-0.371001	-0.370705	-0.371156	-0.371133	-0.37115	0.161583	0.181946	0.205165	0.202342	0.189615
ENSG00000101197.13	BIRC7	20:63199651:C:T	0.00564137	0.00712255	0.0092328	0.0071777	0.00935265	20:63199651:C:T-ENSG00000101197.13	0.467178	0.4665	0.465795	0.467036	0.465716	0.201765	0.260475	0.2932	0.22929	0.297539
ENSG00000166619.15	BLCAP	20:37504544:G:A	0.0164626	0.652482	0.49963	0.693595	0.687185	20:37504544:G:A-ENSG00000166619.15	-0.446582	-0.0184377	0.102748	-0.0113632	-0.0124445	0.165004	0.130943	0.156828	0.183213	0.158738
ENSG00000136573.15	BLK	8:11527609:T:G	0.0116414	0.011879	0.0115272	0.0121516	0.0120609	8:11527609:T:G-ENSG00000136573.15	-0.403456	-0.403521	-0.404094	-0.403678	-0.403591	0.209421	0.229845	0.221671	0.26122	0.234681
ENSG00000196072.12	BLOC1S2	10:100286623:T:G	0.000751309	0.000440816	0.000414177	0.000473122	0.000413781	10:100286623:T:G-ENSG00000196072.12	-0.387856	-0.388347	-0.388848	-0.388691	-0.388713	0.181645	0.129545	0.161774	0.183819	0.158637
ENSG00000065060.18	BLTP3A	6:34836170:C:T	1.97315e-05	3.08808e-05	2.70463e-05	1.95177e-05	1.44993e-05	6:34836170:C:T-ENSG00000065060.18	0.479679	0.479578	0.479767	0.479907	0.479949	0.191579	0.143659	0.176659	0.158152	0.160822
ENSG00000106605.11	BLVRA	7:43793563:T:C	4.56377e-05	4.78687e-05	2.17357e-05	6.69222e-05	2.88183e-05	7:43793563:T:C-ENSG00000106605.11	0.324584	0.325051	0.326178	0.325438	0.325894	0.0955303	0.123316	0.110515	0.128299	0.116603
ENSG00000090013.11	BLVRB	19:40443311:C:A	0.000419006	0.00035833	0.000322104	0.00034948	0.000230595	19:40443311:C:A-ENSG00000090013.11	0.400571	0.400719	0.401061	0.401095	0.401333	0.207001	0.140848	0.135128	0.187738	0.162501
ENSG00000117475.14	BLZF1	1:169390416:C:T	0.0110397	0.0129972	0.00518283	0.0115551	0.0367213	1:169390416:C:T-ENSG00000117475.14	0.231304	0.229703	0.237659	0.230658	0.221664	0.117816	0.135921	0.101901	0.119301	0.146441
ENSG00000133794.20	BMAL1	11:13298986:C:T	0.0304614	0.0332807	0.0294473	0.0344979	0.000527548	11:13298986:C:T-ENSG00000133794.20	0.296312	0.294831	0.297527	0.294766	0.314509	0.146203	0.140418	0.128062	0.134704	0.115862
ENSG00000168283.14	BMI1	10:22316469:C:G	0.00623301	0.0159375	1.42138e-06	0.00123329	0.00248169	10:22316469:C:G-ENSG00000168283.14	-0.715943	-0.71068	-0.730472	-0.721129	-0.719073	0.277559	0.322777	0.17806	0.234267	0.271496
ENSG00000116985.12	BMP8B	1:39757456:T:C	0.0210024	0.0219389	0.0207271	0.0185617	0.0189898	1:39757456:T:C-ENSG00000116985.12	0.558947	0.55873	0.559085	0.560045	0.559462	0.42005	0.39079	0.39953	0.346575	0.325123
ENSG00000291069.1	BMS1P1	10:46780788:GA:G	0.00763632	0.0280885	0.0017975	0.00256378	0.214868	10:46780788:GA:G-ENSG00000291069.1	0.434746	0.401034	0.469624	0.454747	0.291401	0.196449	0.21181	0.1955	0.207361	0.23772
ENSG00000163141.20	BNIPL	1:151030595:G:A	0.0117543	0.010337	0.00933881	0.000934179	0.00786785	1:151030595:G:A-ENSG00000163141.20	-0.460334	-0.461101	-0.461687	-0.469604	-0.462867	0.227938	0.23008	0.22008	0.176755	0.193863
ENSG00000038219.13	BOD1L1	4:13578908:A:G	4.27195e-07	1.75833e-06	3.00748e-07	1.60532e-07	5.73486e-08	4:13578908:A:G-ENSG00000038219.13	0.286444	0.286106	0.286886	0.287565	0.287901	0.0852531	0.0815285	0.0765033	0.0744063	0.080892
ENSG00000176720.6	BOK	2:241584508:C:G	0.00196142	0.00204021	0.00204776	0.00198961	0.00168556	2:241584508:C:G-ENSG00000176720.6	-0.797454	-0.79744	-0.797458	-0.797478	-0.797588	0.421142	0.4661	0.426743	0.37625	0.384697
ENSG00000101425.14	BPI	20:38330267:G:A	0.00105652	5.91874e-05	0.000185359	0.000355545	2.16027e-05	20:38330267:G:A-ENSG00000101425.14	0.526988	0.527826	0.527635	0.527577	0.52837	0.243073	0.139044	0.197362	0.250792	0.183531
ENSG00000106009.16	BRAT1	7:2532027:A:G	0.197527	0.531885	0.27964	0.456495	0.000837104	7:2532027:A:G-ENSG00000106009.16	0.203223	0.0609449	0.143966	0.0852865	0.395092	0.136718	0.150847	0.135783	0.160717	0.113467
ENSG00000204256.14	BRD2	6:32985934:T:C	0.000332262	1.08626e-05	8.46244e-06	3.17901e-05	3.4041e-05	6:32985934:T:C-ENSG00000204256.14	-0.31347	-0.314373	-0.315146	-0.314192	-0.314519	0.16625	0.091594	0.0985945	0.0918019	0.113729
ENSG00000169925.17	BRD3	9:134041883:G:A	0.00299748	0.00319101	0.00345238	0.00317004	0.000740387	9:134041883:G:A-ENSG00000169925.17	-0.392222	-0.392323	-0.392299	-0.392597	-0.393724	0.17419	0.225672	0.212469	0.197672	0.126089
ENSG00000166164.16	BRD7	16:50319618:C:G	4.07102e-09	1.17577e-11	2.85657e-08	1.81709e-10	2.25916e-09	16:50319618:C:G-ENSG00000166164.16	0.674454	0.674465	0.674464	0.674475	0.674472	0.158312	0.134545	0.169302	0.160653	0.162424
ENSG00000028310.18	BRD9	5:873591:C:T	0.256665	0.21215	0.0895715	0.0450673	0.0472385	5:873591:C:T-ENSG00000028310.18	0.0972237	0.121206	0.148133	0.182312	0.176217	0.172117	0.138593	0.134712	0.115041	0.135854
ENSG00000185024.18	BRF1	14:105291880:A:C	0.0408607	0.0400574	0.0413829	0.0363802	0.0256279	14:105291880:A:C-ENSG00000185024.18	0.231359	0.231746	0.231261	0.233387	0.235587	0.208578	0.143474	0.161616	0.179938	0.141466
ENSG00000104221.13	BRF2	8:37859603:C:A	0.0220533	0.0165504	0.0195551	0.0179088	0.00297033	8:37859603:C:A-ENSG00000104221.13	-0.34811	-0.351411	-0.34952	-0.350143	-0.359563	0.207121	0.181908	0.195637	0.153834	0.157943
ENSG00000164713.10	BRI3	7:98292221:A:G	0.00237966	0.102907	0.0723372	0.061105	0.0134238	7:98292221:A:G-ENSG00000164713.10	-0.157828	-0.128283	-0.134342	-0.137587	-0.153625	0.0556603	0.0823608	0.08322	0.103027	0.0579885
ENSG00000254999.4	BRK1	3:10126963:T:C	0.000408747	0.000194721	0.000152104	0.000198278	0.000193346	3:10126963:T:C-ENSG00000254999.4	-0.344047	-0.34449	-0.34503	-0.344711	-0.344791	0.231575	0.128205	0.114105	0.121485	0.137133
ENSG00000162819.12	BROX	1:222714209:C:CT	0.0137395	0.0376896	0.0226074	0.0238662	0.0316036	1:222714209:C:CT-ENSG00000162819.12	0.218704	0.208922	0.215278	0.213923	0.212148	0.142918	0.176331	0.11711	0.113917	0.130745
ENSG00000156983.17	BRPF1	3:9753656:CA:C	0.739682	0.0258172	0.725999	0.747055	0.725379	3:9753656:CA:C-ENSG00000156983.17	-0.0271564	0.247093	-0.0124331	-0.00881967	0.0108847	0.167479	0.0914956	0.113768	0.149409	0.113893
ENSG00000246982.7	BRPF3-AS1	6:36196164:C:T	6.98082e-05	7.7502e-05	5.56116e-05	4.89594e-05	4.81971e-05	6:36196164:C:T-ENSG00000246982.7	-0.703065	-0.70307	-0.703115	-0.703135	-0.703132	0.289022	0.324796	0.291902	0.213087	0.272051
ENSG00000172270.22	BSG	19:565807:C:T	0.000253329	7.1535e-05	2.5335e-06	7.11797e-06	2.49296e-07	19:565807:C:T-ENSG00000172270.22	0.333221	0.333739	0.335311	0.335301	0.336331	0.109992	0.101548	0.0797588	0.111982	0.0961698
ENSG00000267751.6	BSG-AS1	19:579450:G:A	7.78961e-10	2.39176e-10	2.0698e-11	3.21442e-08	8.07834e-10	19:579450:G:A-ENSG00000267751.6	-0.868593	-0.868593	-0.868594	-0.868594	-0.868594	0.205697	0.191542	0.182641	0.263966	0.220738
ENSG00000109743.11	BST1	4:15726598:C:A	0.0891812	0.102524	0.0192803	0.034851	0.0979857	4:15726598:C:A-ENSG00000109743.11	-0.152395	-0.148468	-0.203384	-0.18918	-0.15004	0.11734	0.105153	0.113449	0.12438	0.126471
ENSG00000133243.10	BTBD2	19:1987280:C:T	0.0129637	0.011619	0.00931861	0.00743995	0.00708239	19:1987280:C:T-ENSG00000133243.10	0.147218	0.147552	0.148764	0.150165	0.14974	0.124331	0.0689258	0.0902504	0.0782282	0.0790605
ENSG00000133639.6	BTG1	12:92114714:T:A	0.0398293	0.0356656	0.0560612	0.0796038	0.0667382	12:92114714:T:A-ENSG00000133639.6	0.268799	0.273648	0.2617	0.252124	0.256618	0.200909	0.218337	0.160491	0.20598	0.191712
ENSG00000159388.6	BTG2	1:203282810:T:A	0.00169268	0.00130406	0.0010095	0.000997174	1.96722e-05	1:203282810:T:A-ENSG00000159388.6	0.401789	0.40195	0.402742	0.402865	0.404544	0.186761	0.134172	0.146921	0.141128	0.120325
ENSG00000233791.7	BTG2-DT	1:203300163:T:G	1.8205e-08	4.35489e-08	4.12778e-08	1.38303e-08	4.34154e-08	1:203300163:T:G-ENSG00000233791.7	0.906444	0.906444	0.906445	0.906446	0.906446	0.251642	0.275178	0.259984	0.213444	0.320798
ENSG00000186265.10	BTLA	3:112453005:C:CA	0.017102	0.0146922	0.00739977	0.0115393	0.0119467	3:112453005:C:CA-ENSG00000186265.10	0.225066	0.2266	0.232233	0.228734	0.227387	0.125918	0.138962	0.133581	0.144046	0.106327
ENSG00000112763.17	BTN2A1	6:26429427:C:A	0.0286393	0.0270923	0.0226879	0.0252987	0.00864716	6:26429427:C:A-ENSG00000112763.17	0.219883	0.220486	0.222406	0.221433	0.227669	0.166952	0.122786	0.101902	0.158485	0.137182
ENSG00000124508.17	BTN2A2	6:26405036:G:C	0.000441624	0.000182567	8.72797e-05	6.3375e-05	0.000282399	6:26405036:G:C-ENSG00000124508.17	0.384906	0.385088	0.386076	0.386304	0.385619	0.179991	0.120668	0.142219	0.122973	0.184035
ENSG00000026950.17	BTN3A1	6:26390925:C:G	2.68329e-06	4.0134e-06	1.36336e-06	2.76508e-06	3.98704e-06	6:26390925:C:G-ENSG00000026950.17	0.336392	0.336263	0.336927	0.336815	0.336819	0.121533	0.106801	0.0809367	0.107998	0.12664
ENSG00000186470.14	BTN3A2	6:26402489:T:C	2.66737e-07	2.61515e-07	2.95974e-07	4.19629e-07	2.12738e-07	6:26402489:T:C-ENSG00000186470.14	-0.718843	-0.718849	-0.718855	-0.718857	-0.718861	0.205564	0.25952	0.223664	0.227936	0.187771
ENSG00000168903.9	BTNL3	5:180947534:G:A	1.36493e-27	7.85267e-29	1.62593e-35	1.60349e-34	1.48633e-33	5:180947534:G:A-ENSG00000168903.9	1.04591	1.04591	1.04591	1.04591	1.04591	0.118241	0.115444	0.0976352	0.103036	0.0998785
ENSG00000113303.12	BTNL8	5:180947484:C:A	1.72586e-07	1.3802e-08	9.4543e-08	4.51053e-08	8.46066e-08	5:180947484:C:A-ENSG00000113303.12	-0.620809	-0.620834	-0.620833	-0.620849	-0.620846	0.218007	0.162265	0.156575	0.158916	0.165684
ENSG00000165810.17	BTNL9	5:181060905:T:C	2.75342e-05	4.98916e-05	3.12993e-05	2.10644e-05	2.75676e-05	5:181060905:T:C-ENSG00000165810.17	0.511649	0.51161	0.511754	0.511882	0.511814	0.187001	0.202473	0.190365	0.148867	0.180044
ENSG00000214688.6	C10orf105	10:71694499:T:C	0.00510554	0.00230945	0.000154524	0.00312594	0.00336177	10:71694499:T:C-ENSG00000214688.6	0.40533	0.407107	0.410651	0.406817	0.40662	0.179948	0.154366	0.126784	0.183492	0.174638
ENSG00000165863.17	C10orf82	10:116665207:G:A	0.0121841	0.0125878	0.0114876	0.0109389	0.0108519	10:116665207:G:A-ENSG00000165863.17	0.396244	0.396237	0.396712	0.397024	0.396852	0.256954	0.252212	0.183669	0.238295	0.223679
ENSG00000119965.13	C10orf88	10:122980902:G:C	0.519345	0.0439844	0.409014	0.572065	0.483705	10:122980902:G:C-ENSG00000119965.13	0.0564093	-0.479194	0.109524	0.0284729	0.0833485	0.180851	0.196933	0.1969	0.206496	0.19265
ENSG00000110665.12	C11orf21	11:2301799:T:C	3.28046e-08	4.52555e-08	1.67936e-09	4.40469e-10	8.28122e-09	11:2301799:T:C-ENSG00000110665.12	-0.768133	-0.768135	-0.76814	-0.768144	-0.768142	0.203106	0.212849	0.185383	0.174016	0.20273
ENSG00000110696.10	C11orf58	11:16638416:T:C	0.0184034	0.0320555	0.0431269	0.0313331	0.0449592	11:16638416:T:C-ENSG00000110696.10	-0.366252	-0.357515	-0.353524	-0.360486	-0.352678	0.213389	0.246875	0.238947	0.230741	0.21447
ENSG00000175573.7	C11orf68	11:65900606:A:C	0.0724552	0.0820679	0.0750427	0.0752989	0.0445493	11:65900606:A:C-ENSG00000175573.7	0.197577	0.195038	0.197001	0.196852	0.203829	0.181731	0.166322	0.166996	0.188946	0.129006
ENSG00000157895.11	C12orf43	12:121020597:C:T	0.00764421	0.00804931	0.00675701	0.00663969	0.00775177	12:121020597:C:T-ENSG00000157895.11	-0.441877	-0.441767	-0.442682	-0.442709	-0.441957	0.257393	0.225018	0.213249	0.23731	0.246233
ENSG00000111678.11	C12orf57	12:6972066:C:CT	0.00784278	0.00864812	0.00905062	0.00895816	0.00884979	12:6972066:C:CT-ENSG00000111678.11	0.49268	0.49249	0.492592	0.492614	0.492589	0.233437	0.30914	0.248664	0.29249	0.313348
ENSG00000204954.10	C12orf73	12:103951475:A:G	0.118287	0.179043	0.0194697	0.156042	0.162291	12:103951475:A:G-ENSG00000204954.10	-0.240174	-0.212375	-0.31257	-0.221016	-0.218211	0.217442	0.197558	0.14678	0.219022	0.173681
ENSG00000235162.9	C12orf75	12:105229772:TTTTC:T	0.0206479	0.0254231	0.0274449	0.0273497	0.0280416	12:105229772:TTTTC:T-ENSG00000235162.9	-0.381946	-0.380417	-0.380552	-0.380477	-0.380087	0.222764	0.235602	0.237011	0.265155	0.266279
ENSG00000283199.3	C13orf46	13:113955808:G:A	0.0835054	0.0694479	0.0823443	0.0185856	0.0853086	13:113955808:G:A-ENSG00000283199.3	-0.230077	-0.238769	-0.231097	-0.268178	-0.229862	0.150795	0.198297	0.17643	0.141824	0.166774
ENSG00000179933.6	C14orf119	14:23100784:G:A	0.0449317	0.0270518	0.0162729	0.114206	0.0316803	14:23100784:G:A-ENSG00000179933.6	-0.347624	-0.360547	-0.387927	-0.313404	-0.357663	0.241821	0.213236	0.201027	0.2391	0.258298
ENSG00000169609.14	C15orf40	15:83011577:G:A	0.0174366	0.0155396	0.0166592	0.0163592	0.0148292	15:83011577:G:A-ENSG00000169609.14	-0.399478	-0.400405	-0.400113	-0.40017	-0.40051	0.27361	0.251221	0.217861	0.212758	0.250224
ENSG00000185905.4	C16orf54	16:29703711:G:A	0.0097557	0.00973224	0.00706828	0.00842186	0.00797036	16:29703711:G:A-ENSG00000185905.4	-0.33735	-0.337507	-0.339063	-0.338163	-0.338301	0.241713	0.201874	0.149321	0.176579	0.175447
ENSG00000154102.11	C16orf74	16:85725179:T:C	0.0118783	0.0100841	0.0132555	0.0119568	0.0121421	16:85725179:T:C-ENSG00000154102.11	0.318553	0.319701	0.318695	0.31953	0.319154	0.149707	0.176143	0.183295	0.196434	0.219561
ENSG00000256806.6	C17orf100	17:6662428:C:T	0.0358944	0.0557158	0.0521976	0.05333	0.0288701	17:6662428:C:T-ENSG00000256806.6	0.328054	0.31967	0.321245	0.320982	0.332614	0.199101	0.29071	0.23275	0.22723	0.203959
ENSG00000141219.16	C17orf80	17:73196329:C:T	0.0031045	0.00377095	0.00483219	0.00410123	0.00501862	17:73196329:C:T-ENSG00000141219.16	0.291347	0.291243	0.290928	0.291577	0.290969	0.128172	0.156245	0.154208	0.120881	0.181197
ENSG00000187624.9	C17orf97	17:402837:A:G	9.4267e-09	2.11332e-09	1.03996e-09	2.11065e-09	1.45667e-10	17:402837:A:G-ENSG00000187624.9	0.654262	0.654271	0.654286	0.65429	0.654296	0.177729	0.165781	0.165934	0.160844	0.136764
ENSG00000131943.20	C19orf12	19:29705402:CA:C	0.0313309	0.0464366	0.0240228	0.0472582	0.0443344	19:29705402:CA:C-ENSG00000131943.20	0.288831	0.281147	0.295722	0.281196	0.282349	0.198145	0.189721	0.16139	0.200621	0.209481
ENSG00000119559.17	C19orf25	19:1451449:G:A	0.210615	0.268115	0.0996855	0.0130285	0.110133	19:1451449:G:A-ENSG00000119559.17	0.121659	0.106178	0.154802	0.206352	0.151597	0.131984	0.138375	0.118533	0.0901016	0.128836
ENSG00000214212.9	C19orf38	19:10879653:C:T	0.0132851	0.012635	0.0109149	0.0119058	0.0104352	19:10879653:C:T-ENSG00000214212.9	0.192328	0.192971	0.19441	0.193839	0.194121	0.108412	0.102783	0.104305	0.161179	0.114195
ENSG00000167747.17	C19orf48	19:50797973:G:A	0.00736186	0.00440523	0.00621574	1.75666e-07	0.00624271	19:50797973:G:A-ENSG00000167747.17	0.339317	0.342589	0.340898	0.35148	0.340662	0.121019	0.102034	0.125326	0.0778272	0.11082
ENSG00000104979.9	C19orf53	19:13750230:T:G	0.448873	0.548616	0.529775	0.547417	0.0269623	19:13750230:T:G-ENSG00000104979.9	-0.0832544	-0.0579437	-0.0597427	-0.0578866	-0.232212	0.148315	0.210467	0.112301	0.154086	0.113269
ENSG00000188493.15	C19orf54	19:40749595:C:G	0.000800418	0.000604951	0.000800776	0.000131665	0.0005928	19:40749595:C:G-ENSG00000188493.15	-0.374362	-0.374593	-0.374744	-0.375976	-0.375245	0.174044	0.129801	0.171037	0.113088	0.191084
ENSG00000106392.11	C1GALT1	7:7187796:C:T	0.00253431	0.00970289	0.00924038	0.00935988	0.00899185	7:7187796:C:T-ENSG00000106392.11	0.200197	0.196495	0.197994	0.19683	0.198169	0.10579	0.102644	0.125546	0.0738975	0.115722
ENSG00000116922.15	C1orf109	1:37708694:G:T	0.518355	0.434454	0.632946	0.0281421	0.503578	1:37708694:G:T-ENSG00000116922.15	0.046981	0.0749243	-0.0159278	0.342458	-0.0600242	0.136396	0.115338	0.134001	0.113144	0.119329
ENSG00000162817.7	C1orf115	1:220697781:A:G	0.0046775	0.00527362	0.00481666	0.00418943	0.00489475	1:220697781:A:G-ENSG00000162817.7	0.354377	0.354194	0.354635	0.355279	0.354664	0.173739	0.203139	0.156177	0.169724	0.197608
ENSG00000197982.14	C1orf122	1:37818573:G:A	0.0199853	0.0261331	0.0201281	0.0211627	0.0255647	1:37818573:G:A-ENSG00000197982.14	0.168466	0.166756	0.169435	0.168255	0.167364	0.11476	0.140867	0.103038	0.0833745	0.131079
ENSG00000175262.15	C1orf127	1:11021823:G:T	0.00751678	0.0575116	0.0167874	0.0394473	0.041101	1:11021823:G:T-ENSG00000175262.15	-0.338667	-0.305958	-0.330539	-0.313415	-0.313379	0.169711	0.208182	0.151623	0.197424	0.197348
ENSG00000131591.18	C1orf159	1:1134062:C:T	0.134846	0.163373	0.145518	0.169855	0.0156009	1:1134062:C:T-ENSG00000131591.18	-0.20855	-0.200291	-0.205899	-0.197966	-0.249402	0.179213	0.237773	0.178821	0.173203	0.114214
ENSG00000198912.12	C1orf174	1:3916757:T:C	0.0250741	0.0186144	0.0220358	0.0249009	0.0220582	1:3916757:T:C-ENSG00000198912.12	0.380474	0.383407	0.382457	0.381031	0.381803	0.265835	0.200966	0.199463	0.332651	0.291773
ENSG00000239887.6	C1orf226	1:162385699:A:G	0.0599727	0.0471884	0.061784	0.0613697	0.058126	1:162385699:A:G-ENSG00000239887.6	0.297007	0.301294	0.297709	0.297578	0.297815	0.250369	0.195979	0.245464	0.248816	0.250432
ENSG00000173369.18	C1QB	1:22645399:A:G	0.0102005	0.00816835	0.0116989	0.0118462	0.0112183	1:22645399:A:G-ENSG00000173369.18	0.360642	0.361626	0.360765	0.360771	0.360868	0.171308	0.166963	0.201656	0.283692	0.248132
ENSG00000172247.4	C1QTNF4	11:47618877:G:C	8.36949e-05	6.35443e-05	6.17774e-05	6.60086e-05	2.89995e-05	11:47618877:G:C-ENSG00000172247.4	-0.556773	-0.55686	-0.556932	-0.556932	-0.557053	0.200947	0.212144	0.212725	0.185438	0.1915
ENSG00000133466.14	C1QTNF6	22:37190921:T:A	5.72144e-07	1.34045e-07	2.3447e-07	2.8013e-08	1.14235e-09	22:37190921:T:A-ENSG00000133466.14	-0.656817	-0.656825	-0.656842	-0.656858	-0.656867	0.227863	0.174428	0.202851	0.165533	0.132937
ENSG00000249252.5	C1QTNF7-AS1	4:15393405:A:G	0.004018	0.0239908	0.0442675	0.0468631	0.047111	4:15393405:A:G-ENSG00000249252.5	0.297044	0.288394	0.281219	0.280157	0.280052	0.1182	0.155274	0.160378	0.176597	0.179811
ENSG00000205885.8	C1RL-AS1	12:7119201:TGG:T	0.000506759	0.000685344	0.000900883	0.00134717	0.00100474	12:7119201:TGG:T-ENSG00000205885.8	0.341987	0.341718	0.341836	0.341448	0.341722	0.159862	0.120956	0.137461	0.156129	0.146635
ENSG00000196421.9	C20orf204	20:64041803:G:C	1.06358e-06	1.32711e-07	2.40093e-08	1.8021e-07	1.77603e-09	20:64041803:G:C-ENSG00000196421.9	0.631186	0.631208	0.631247	0.631245	0.631274	0.170416	0.162601	0.167526	0.173711	0.145713
ENSG00000101220.18	C20orf27	20:3794515:GTT:G	0.00212819	0.0023379	0.00194278	0.00169253	0.00139428	20:3794515:GTT:G-ENSG00000101220.18	0.252029	0.251785	0.252599	0.253354	0.253545	0.123808	0.116075	0.110752	0.104846	0.126941
ENSG00000196476.12	C20orf96	20:291169:TTCTC:T	0.0143737	0.145342	0.117115	0.104783	0.107423	20:291169:TTCTC:T-ENSG00000196476.12	0.29085	0.226641	0.237711	0.245911	0.243214	0.153027	0.144212	0.198	0.222003	0.176359
ENSG00000240770.5	C21orf91-OT1	21:17791390:C:T	0.0047622	0.00521647	0.0046911	0.00438544	0.00503409	21:17791390:C:T-ENSG00000240770.5	-0.412112	-0.411973	-0.412544	-0.412725	-0.412207	0.213349	0.217419	0.225729	0.1908	0.195484
ENSG00000172375.14	C2CD2L	11:119118388:C:G	0.0035779	0.00391448	0.0201225	0.00542885	3.62676e-05	11:119118388:C:G-ENSG00000172375.14	-0.400464	-0.398751	-0.39202	-0.399503	-0.409044	0.168401	0.122406	0.173547	0.205714	0.122775
ENSG00000168014.18	C2CD3	11:74122899:G:A	0.543655	0.590472	0.489193	0.00686877	0.547018	11:74122899:G:A-ENSG00000168014.18	-0.101238	0.0517057	0.123333	-0.629829	0.0836767	0.399637	0.209412	0.232538	0.193215	0.258398
ENSG00000225556.2	C2CD4D	1:151878891:T:C	0.701828	0.663322	0.568518	0.0221243	0.657965	1:151878891:T:C-ENSG00000225556.2	-0.0191431	0.0317726	0.0671514	0.426186	0.0309708	0.22107	0.196485	0.210757	0.143605	0.218007
ENSG00000168887.11	C2orf68	2:85628177:G:A	0.0747308	0.0646836	0.0676541	0.0665784	0.0352558	2:85628177:G:A-ENSG00000168887.11	0.20994	0.213697	0.212773	0.213169	0.222601	0.145764	0.137991	0.201487	0.231168	0.169096
ENSG00000212978.6	C2orf74-DT	2:61190010:C:G	0.011239	0.0115842	0.0106359	0.0096952	0.0104825	2:61190010:C:G-ENSG00000212978.6	-0.351229	-0.35124	-0.351822	-0.352337	-0.35177	0.208979	0.194742	0.187526	0.183491	0.207067
ENSG00000125730.18	C3	19:6742095:T:TA	0.000905902	0.00122386	0.00121917	0.00116605	0.00114135	19:6742095:T:TA-ENSG00000125730.18	0.519182	0.519026	0.519153	0.519219	0.519227	0.20711	0.259798	0.244029	0.213308	0.234822
ENSG00000171860.5	C3AR1	12:8053571:A:G	2.98129e-18	3.34641e-15	2.34466e-23	1.08497e-23	5.20915e-14	12:8053571:A:G-ENSG00000171860.5	0.857222	0.857222	0.857222	0.857222	0.857222	0.105504	0.128276	0.115704	0.111947	0.150069
ENSG00000088543.15	C3orf18	3:50582584:G:A	0.0488248	0.0458843	0.0418327	0.0487965	0.0473846	3:50582584:G:A-ENSG00000088543.15	-0.199963	-0.201415	-0.203733	-0.200692	-0.200851	0.131355	0.15756	0.1463	0.165886	0.1755
ENSG00000131379.10	C3orf20	3:14670966:G:A	0	2.88658e-15	0	0	0	3:14670966:G:A-ENSG00000131379.10	-1.01964	-1.01964	-1.01964	-1.01964	-1.01964	0.144876	0.171014	0.14858	0.162859	0.152114
ENSG00000179021.10	C3orf38	3:88163563:A:G	0.0609976	0.0521959	0.0463429	0.0413584	0.0394715	3:88163563:A:G-ENSG00000179021.10	0.164605	0.168441	0.16903	0.170464	0.169964	0.112826	0.153618	0.16612	0.123189	0.118145
ENSG00000188315.8	C3orf62	3:49279905:T:C	0.0172187	0.013841	0.015747	0.0155964	0.003455	3:49279905:T:C-ENSG00000188315.8	0.234778	0.236908	0.235813	0.236541	0.241562	0.134588	0.10573	0.113869	0.154212	0.118476
ENSG00000225873.4	C3orf86P	3:44409831:TC:T	0.0071656	0.00579614	0.00900737	0.00924761	0.00818923	3:44409831:TC:T-ENSG00000225873.4	-0.175459	-0.176232	-0.175236	-0.175408	-0.175979	0.0989503	0.0817205	0.084404	0.106762	0.110799
ENSG00000123838.11	C4BPA	1:207104004:GC:G	1.06353e-06	1.48475e-06	8.55434e-07	1.03208e-06	1.26213e-06	1:207104004:GC:G-ENSG00000123838.11	0.581644	0.581659	0.581725	0.581735	0.581726	0.168061	0.201478	0.151532	0.196823	0.199472
ENSG00000123843.13	C4BPB	1:207112360:T:G	0.0461999	0.0690713	0.0896674	0.0884602	0.0963402	1:207112360:T:G-ENSG00000123843.13	-0.370203	-0.359193	-0.353368	-0.353324	-0.349313	0.237769	0.338981	0.300328	0.301564	0.362411
ENSG00000164096.13	C4orf3	4:119293828:TA:T	0.000216764	0.00552016	0.00498297	0.00453389	0.00464925	4:119293828:TA:T-ENSG00000164096.13	0.210482	0.207449	0.20896	0.209457	0.209527	0.061327	0.0901836	0.128528	0.0997292	0.109721
ENSG00000151470.13	C4orf33	4:129122281:C:T	0.00774206	0.00909402	0.00689297	0.00102943	0.00638881	4:129122281:C:T-ENSG00000151470.13	-0.274455	-0.273977	-0.275524	-0.280195	-0.275707	0.142583	0.144351	0.145207	0.104413	0.112727
ENSG00000243449.8	C4orf48	4:2043063:G:A	0.0045309	0.0138241	0.00986773	0.0123866	0.00985835	4:2043063:G:A-ENSG00000243449.8	0.245166	0.240968	0.243514	0.241846	0.243677	0.115783	0.153989	0.117252	0.118584	0.134488
ENSG00000185127.7	C6orf120	6:169733767:A:G	0.93928	0.000248544	0.932195	0.942263	0.954587	6:169733767:A:G-ENSG00000185127.7	0.00457214	0.346515	0.00573145	0.00388978	-0.000482844	0.106276	0.0840927	0.0792946	0.0964983	0.1263
ENSG00000112308.13	C6orf62	6:24683053:T:C	8.60298e-06	1.18977e-05	2.46716e-05	6.04684e-06	5.34084e-06	6:24683053:T:C-ENSG00000112308.13	0.551078	0.551097	0.551124	0.551259	0.551249	0.174948	0.198366	0.196662	0.168247	0.173345
ENSG00000198663.17	C6orf89	6:36846536:C:T	0.0570685	0.0293529	0.050872	0.0549657	0.060085	6:36846536:C:T-ENSG00000198663.17	-0.223621	-0.233804	-0.227829	-0.225793	-0.223083	0.170109	0.133863	0.167269	0.23107	0.160132
ENSG00000146540.15	C7orf50	7:1148532:C:CT	0.00734713	0.00716334	0.00675299	0.00758604	0.00620555	7:1148532:C:CT-ENSG00000146540.15	0.497516	0.497731	0.498085	0.497596	0.498167	0.255035	0.314208	0.219568	0.289023	0.29747
ENSG00000176919.13	C8G	9:136956658:A:ATGATGGAT	0.0109698	0.0102658	0.0100864	0.00976418	0.00553805	9:136956658:A:ATGATGGAT-ENSG00000176919.13	0.273196	0.27379	0.273985	0.274177	0.27552	0.183535	0.153441	0.159521	0.138624	0.12107
ENSG00000241852.11	C8orf58	8:22592038:C:CATTTTTCTT	0.00259113	0.00259318	0.00103008	0.00196514	0.00190474	8:22592038:C:CATTTTTCTT-ENSG00000241852.11	0.290153	0.290224	0.292193	0.291011	0.291213	0.169069	0.145672	0.106535	0.118928	0.135429
ENSG00000213563.7	C8orf82	8:144516381:G:A	0.599533	0.0316915	0.552493	0.720889	0.596049	8:144516381:G:A-ENSG00000213563.7	-0.0350194	-0.287444	0.0637631	-0.00325864	-0.0320731	0.148874	0.114139	0.131912	0.125364	0.143205
ENSG00000196366.3	C9orf163	9:136510909:A:G	2.3952e-06	0.310279	0.588924	0.312463	0.333021	9:136510909:A:G-ENSG00000196366.3	0.617781	-0.135268	0.00471404	0.12079	0.111805	0.122917	0.217602	0.194264	0.18108	0.183679
ENSG00000147894.17	C9orf72	9:27546892:G:A	0.000837863	0.00063203	0.000677682	6.37184e-06	0.000576086	9:27546892:G:A-ENSG00000147894.17	-0.340592	-0.34137	-0.341557	-0.343387	-0.341927	0.119857	0.15132	0.139726	0.0836738	0.127707
ENSG00000136819.15	C9orf78	9:129810348:T:G	1.20592e-12	1.10623e-12	0	4.19442e-13	7.62723e-14	9:129810348:T:G-ENSG00000136819.15	-0.848214	-0.848215	-0.848215	-0.848215	-0.848215	0.16207	0.153628	0.145745	0.189079	0.13639
ENSG00000063180.9	CA11	19:48661483:T:C	0.210117	0.00932513	0.194419	0.193259	0.183126	19:48661483:T:C-ENSG00000063180.9	-0.160134	-0.230943	-0.166045	-0.166949	-0.168279	0.151677	0.105261	0.110026	0.124311	0.167066
ENSG00000185015.8	CA13	8:85215369:G:A	0.259227	0.0441533	0.350236	0.516048	0.192534	8:85215369:G:A-ENSG00000185015.8	0.138189	0.34245	0.106427	0.0318215	0.176813	0.194584	0.187625	0.214787	0.197607	0.200468
ENSG00000241527.1	CA15P1	22:19044101:T:C	7.79425e-09	3.84091e-06	2.49119e-05	4.60267e-07	5.74858e-05	22:19044101:T:C-ENSG00000241527.1	-0.749077	-0.749023	-0.748998	-0.749047	-0.748983	0.167626	0.23934	0.24414	0.176916	0.289481
ENSG00000104267.10	CA2	8:85461252:C:T	0.0536276	0.0414874	0.0561996	0.050757	0.044948	8:85461252:C:T-ENSG00000104267.10	-0.190673	-0.194729	-0.190822	-0.192601	-0.193226	0.147247	0.143557	0.151913	0.159147	0.130688
ENSG00000253549.6	CA3-AS1	8:85475301:G:GT	0.0220379	0.0226672	0.0166265	0.0176157	0.0127853	8:85475301:G:GT-ENSG00000253549.6	0.275686	0.275636	0.278292	0.277603	0.279396	0.182917	0.155054	0.147077	0.185113	0.168001
ENSG00000131686.15	CA6	1:8960846:T:C	0.102291	0.0430489	0.0868083	0.0998164	0.0713587	1:8960846:T:C-ENSG00000131686.15	0.194695	0.217787	0.201916	0.197119	0.204464	0.171351	0.147872	0.155643	0.182049	0.165496
ENSG00000120159.13	CAAP1	9:26885169:C:T	0.0666249	0.0768633	0.079277	0.0743619	0.041548	9:26885169:C:T-ENSG00000120159.13	-0.188873	-0.186115	-0.185814	-0.18733	-0.195389	0.15553	0.137392	0.177668	0.159752	0.131927
ENSG00000102547.19	CAB39L	13:49482657:T:C	0.0490754	0.0464414	0.0568219	0.0589077	0.0590008	13:49482657:T:C-ENSG00000102547.19	-0.27622	-0.277151	-0.275482	-0.274381	-0.273909	0.237905	0.194293	0.204424	0.196607	0.241153
ENSG00000149679.12	CABLES2	20:62402808:T:G	0.0212665	0.0165938	0.0202852	0.0182872	0.0128657	20:62402808:T:G-ENSG00000149679.12	0.3123	0.314551	0.313101	0.314107	0.315781	0.207116	0.16266	0.195446	0.200711	0.171214
ENSG00000160325.15	CACFD1	9:133412360:G:A	0.00565554	0.00561696	0.00581437	0.00566955	0.00442644	9:133412360:G:A-ENSG00000160325.15	0.315444	0.31562	0.315854	0.315948	0.316448	0.168406	0.152752	0.186023	0.159156	0.14622
ENSG00000007402.12	CACNA2D2	3:50516679:G:GC	0.0442355	0.0383848	0.0393999	0.041653	0.0425315	3:50516679:G:GC-ENSG00000007402.12	0.324506	0.326923	0.327226	0.32581	0.325001	0.282554	0.222635	0.213311	0.263784	0.220931
ENSG00000182389.20	CACNB4	2:152067546:C:T	0.0316474	0.0325428	0.0263197	0.0251855	0.0220347	2:152067546:C:T-ENSG00000182389.20	0.360515	0.360512	0.36231	0.362827	0.363386	0.26314	0.275554	0.219645	0.248599	0.203313
ENSG00000130433.8	CACNG6	19:54011694:T:C	0.000125043	0.000132991	0.000143362	0.000154025	1.71743e-05	19:54011694:T:C-ENSG00000130433.8	0.371184	0.371545	0.371888	0.371925	0.372651	0.102417	0.139335	0.168698	0.153265	0.122055
ENSG00000151893.15	CACUL1	10:118751691:A:C	0.0239274	0.021972	0.0201403	0.0236518	0.0347814	10:118751691:A:C-ENSG00000151893.15	0.140942	0.141575	0.143174	0.141076	0.138161	0.1126	0.100548	0.0740342	0.0758195	0.110284
ENSG00000084774.14	CAD	2:27202505:C:CAA	0.0721442	0.0635405	0.064726	0.0607565	0.0207591	2:27202505:C:CAA-ENSG00000084774.14	0.206443	0.209905	0.208565	0.210409	0.222771	0.198945	0.149557	0.127292	0.145605	0.137587
ENSG00000012822.16	CALCOCO1	12:53707601:C:CA	0.000929214	0.000346696	0.000912464	0.000909985	0.000553126	12:53707601:C:CA-ENSG00000012822.16	-0.280489	-0.281147	-0.280612	-0.281118	-0.281437	0.241798	0.0870524	0.115393	0.174946	0.108289
ENSG00000183049.14	CAMK1D	10:12328698:A:G	0.00309103	0.00271056	0.00407066	0.00336031	0.00324688	10:12328698:A:G-ENSG00000183049.14	-0.23723	-0.237891	-0.237012	-0.237937	-0.237488	0.118368	0.128704	0.134786	0.122605	0.0933559
ENSG00000148660.22	CAMK2G	10:73829120:G:A	0.189607	0.180827	0.0117677	0.13942	0.122339	10:73829120:G:A-ENSG00000148660.22	0.232229	0.236074	0.369249	0.253713	0.258778	0.252904	0.194202	0.16912	0.221842	0.161259
ENSG00000152495.11	CAMK4	5:111237367:G:A	0.00270001	0.00305217	0.00410923	0.00427208	0.0038121	5:111237367:G:A-ENSG00000152495.11	0.233294	0.23326	0.233383	0.233298	0.233679	0.0949937	0.0963918	0.136601	0.147158	0.14068
ENSG00000110931.19	CAMKK2	12:121289895:TA:T	0.00583505	0.00525155	0.00634198	0.00463493	0.00503105	12:121289895:TA:T-ENSG00000110931.19	0.504497	0.504925	0.504445	0.50567	0.505073	0.253424	0.22952	0.284491	0.271981	0.274137
ENSG00000164615.6	CAMLG	5:134743591:G:A	8.52907e-05	8.73853e-05	9.88623e-05	0.000102345	6.92027e-05	5:134743591:G:A-ENSG00000164615.6	0.50911	0.509122	0.509195	0.509218	0.509294	0.225759	0.168253	0.214177	0.207569	0.162352
ENSG00000130559.19	CAMSAP1	9:135926497:T:A	0.0336042	0.401253	0.459868	0.447611	0.474874	9:135926497:T:A-ENSG00000130559.19	0.276563	0.121028	0.106399	0.109545	0.100272	0.1506	0.234645	0.178911	0.183	0.207133
ENSG00000108509.21	CAMTA2	17:4984995:C:A	0.0146009	0.0438546	0.0479254	0.0508775	0.053882	17:4984995:C:A-ENSG00000108509.21	0.201504	0.18732	0.186781	0.185921	0.184964	0.174585	0.113251	0.0932037	0.124656	0.144569
ENSG00000171302.17	CANT1	17:78977257:T:C	0.361944	0.561651	0.0065507	0.284481	0.503815	17:78977257:T:C-ENSG00000171302.17	0.0844089	-0.0177594	-0.399366	0.15426	0.0423451	0.125163	0.128961	0.118063	0.138393	0.171107
ENSG00000131236.18	CAP1	1:40081615:T:C	0.0907912	0.0601566	0.0774642	0.0939925	0.0364019	1:40081615:T:C-ENSG00000131236.18	-0.225544	-0.241223	-0.231407	-0.225169	-0.251176	0.177294	0.171535	0.184775	0.18397	0.180455
ENSG00000232004.1	CAP1P2	10:43646539:C:T	0.565131	0.0475714	0.498552	0.520199	0.352261	10:43646539:C:T-ENSG00000232004.1	-0.0350072	0.301077	0.059913	-0.0318591	0.0830127	0.209829	0.143144	0.172238	0.184627	0.211658
ENSG00000042493.16	CAPG	2:85396199:T:C	2.26734e-07	9.96137e-10	3.61467e-07	6.08951e-09	8.33463e-07	2:85396199:T:C-ENSG00000042493.16	-0.494986	-0.49509	-0.495091	-0.495187	-0.495146	0.149042	0.099264	0.149951	0.103616	0.191438
ENSG00000014216.16	CAPN1	11:65180806:A:C	8.7053e-09	2.44363e-11	6.55144e-09	2.89368e-08	2.65565e-12	11:65180806:A:C-ENSG00000014216.16	0.364454	0.364995	0.364566	0.364987	0.365612	0.0826123	0.0748982	0.0695434	0.0880476	0.0767689
ENSG00000142330.20	CAPN10	2:240605435:A:C	0.00186118	0.000328964	0.0012522	0.000904144	0.00153873	2:240605435:A:C-ENSG00000142330.20	0.409635	0.411273	0.410241	0.411114	0.410166	0.193855	0.138159	0.161712	0.17938	0.17614
ENSG00000182472.9	CAPN12	19:38739406:G:A	1.70477e-05	2.84596e-06	4.61147e-06	2.09895e-06	1.77028e-05	19:38739406:G:A-ENSG00000182472.9	0.440734	0.441015	0.44114	0.441448	0.44115	0.13647	0.117503	0.141822	0.141064	0.166812
ENSG00000103326.12	CAPN15	16:536144:T:C	0.000406479	0.00045058	0.000331485	0.000294983	0.000265908	16:536144:T:C-ENSG00000103326.12	-0.390853	-0.390644	-0.391251	-0.391462	-0.391486	0.268452	0.135903	0.161034	0.136095	0.162803
ENSG00000254614.2	CAPN1-AS1	11:65174945:G:T	3.05922e-05	3.7564e-05	5.11243e-05	2.89037e-05	3.36274e-05	11:65174945:G:T-ENSG00000254614.2	-0.438554	-0.438573	-0.438626	-0.438934	-0.43879	0.150974	0.168716	0.161464	0.14436	0.14367
ENSG00000149260.18	CAPN5	11:77018863:A:G	0.0145202	0.0143316	0.0142996	0.0110885	0.0150086	11:77018863:A:G-ENSG00000149260.18	0.251231	0.25176	0.252113	0.25373	0.251505	0.135887	0.16287	0.183617	0.130972	0.142765
ENSG00000126247.11	CAPNS1	19:36099259:C:T	0.706894	0.761733	0.750451	0.767052	0.00760021	19:36099259:C:T-ENSG00000126247.11	-0.0334114	0.0119441	-0.0129539	0.0120538	0.215435	0.0864532	0.061979	0.055988	0.0725549	0.0717022
ENSG00000116489.13	CAPZA1	1:112617548:C:T	0.143454	0.0239887	0.168902	0.163544	0.162449	1:112617548:C:T-ENSG00000116489.13	-0.142556	-0.181141	-0.137881	-0.139735	-0.139287	0.101708	0.108837	0.10604	0.147281	0.136866
ENSG00000198286.11	CARD11	7:3091280:A:G	5.96657e-05	9.72152e-05	6.38342e-05	0.000109278	1.72965e-05	7:3091280:A:G-ENSG00000198286.11	0.339905	0.339626	0.340382	0.340478	0.341108	0.106221	0.110857	0.113869	0.184482	0.115164
ENSG00000204397.10	CARD16	11:105138157:A:T	0.145876	0.159568	0.160778	0.149647	0.0069094	11:105138157:A:T-ENSG00000204397.10	0.133373	0.131001	0.130941	0.13422	0.16745	0.0806152	0.100968	0.122697	0.101024	0.0778082
ENSG00000165233.18	CARD19	9:93113293:G:A	1.49709e-06	5.40201e-07	1.35762e-06	1.07172e-06	1.529e-07	9:93113293:G:A-ENSG00000165233.18	0.38841	0.38857	0.388612	0.388652	0.389208	0.133817	0.105346	0.106642	0.0958538	0.125308
ENSG00000105483.18	CARD8	19:48247672:C:T	0.00010858	7.13109e-05	7.46397e-05	8.67613e-05	3.09691e-06	19:48247672:C:T-ENSG00000105483.18	0.385132	0.385571	0.385793	0.385652	0.386312	0.13528	0.149012	0.154521	0.121704	0.0966319
ENSG00000268001.1	CARD8-AS1	19:48289985:C:CAA	0.0270925	0.0749686	0.0209932	0.0208037	0.0070788	19:48289985:C:CAA-ENSG00000268001.1	-0.328874	-0.306622	-0.333549	-0.3349	-0.351618	0.18075	0.22522	0.176575	0.19854	0.16888
ENSG00000079691.19	CARMIL1	6:25316423:CT:C	0.0386797	0.0412306	0.0352572	0.0373157	0.0341073	6:25316423:CT:C-ENSG00000079691.19	0.244963	0.244464	0.246609	0.245646	0.246288	0.173766	0.185486	0.158992	0.21407	0.16339
ENSG00000186648.15	CARMIL3	14:24065572:G:A	0.0118599	0.0198349	0.0219005	0.0220561	0.0218872	14:24065572:G:A-ENSG00000186648.15	0.247428	0.244845	0.244935	0.244772	0.244761	0.15057	0.167824	0.14413	0.136471	0.133124
ENSG00000110619.18	CARS1	11:3097928:C:T	0.703863	0.717345	0.655924	0.615129	0.00737572	11:3097928:C:T-ENSG00000110619.18	0.0302698	-0.0184354	0.0502147	0.0629034	-0.429909	0.138535	0.106877	0.177759	0.147829	0.129162
ENSG00000134905.17	CARS2	13:110723224:G:T	0.0031673	0.00401828	0.00326677	0.0030232	0.00434109	13:110723224:G:T-ENSG00000134905.17	-0.215683	-0.215635	-0.216765	-0.217366	-0.215921	0.0844843	0.13376	0.0989453	0.122131	0.132827
ENSG00000127995.17	CASD1	7:94558387:T:C	0.215711	0.219654	0.230166	0.227682	0.0488928	7:94558387:T:C-ENSG00000127995.17	-0.0758086	-0.0756042	-0.0738303	-0.0744554	-0.103295	0.0768251	0.0827784	0.0819171	0.0989528	0.0636618
ENSG00000137752.25	CASP1	11:105082850:A:T	0.0180527	0.0192352	0.0134929	0.00441104	0.0142924	11:105082850:A:T-ENSG00000137752.25	0.376013	0.375521	0.378949	0.387733	0.37871	0.206464	0.168556	0.187058	0.189763	0.268829
ENSG00000003400.16	CASP10	2:201190589:C:T	0.00578483	0.00641453	0.0086897	0.00950356	0.00428485	2:201190589:C:T-ENSG00000003400.16	-0.345277	-0.345151	-0.344335	-0.344111	-0.347071	0.144215	0.160529	0.198647	0.219668	0.179961
ENSG00000164305.20	CASP3	4:184678828:AGTTCTTACA:A	0.018526	0.0212314	0.0213533	0.0180329	0.0221808	4:184678828:AGTTCTTACA:A-ENSG00000164305.20	-0.410478	-0.409532	-0.409798	-0.411636	-0.409304	0.225282	0.286932	0.274343	0.247193	0.247228
ENSG00000196954.14	CASP4	11:105007076:A:G	0.0160633	0.0109197	0.0282825	0.0278251	0.0331936	11:105007076:A:G-ENSG00000196954.14	0.139393	0.140959	0.137826	0.138022	0.13649	0.0763613	0.0673896	0.0889173	0.0867842	0.10689
ENSG00000165806.21	CASP7	10:113712960:G:A	0.00895794	0.00818953	0.00951559	0.0076199	0.00234893	10:113712960:G:A-ENSG00000165806.21	-0.216549	-0.217026	-0.216637	-0.218238	-0.219704	0.135544	0.0996391	0.131882	0.11721	0.0863777
ENSG00000132906.18	CASP9	1:15568464:T:C	0.00163841	0.0112046	0.00208177	0.0336829	0.000647223	1:15568464:T:C-ENSG00000132906.18	0.303563	0.294855	0.305437	0.288018	0.314324	0.103555	0.128739	0.136311	0.153763	0.147235
ENSG00000291122.1	CASTOR3P	7:100229038:CA:C	0.232588	0.242055	0.00243209	0.254158	0.238899	7:100229038:CA:C-ENSG00000291122.1	-0.179453	-0.176688	-0.278756	-0.173554	-0.178322	0.140146	0.146384	0.092074	0.155648	0.154318
ENSG00000121691.7	CAT	11:34466182:T:C	1.68199e-13	8.94211e-10	3.0406e-08	5.55527e-09	2.24447e-10	11:34466182:T:C-ENSG00000121691.7	-0.590922	-0.590911	-0.590926	-0.59094	-0.590936	0.103974	0.132164	0.163385	0.162685	0.110668
ENSG00000099338.23	CATSPERG	19:38337869:A:C	2.3273e-05	2.26364e-05	2.03623e-05	2.11276e-05	2.18074e-05	19:38337869:A:C-ENSG00000099338.23	0.953304	0.953306	0.953313	0.953312	0.953311	0.406584	0.379752	0.326669	0.345711	0.371771
ENSG00000170955.10	CAVIN3	11:6306304:C:T	0.0618774	0.0617183	0.0548102	0.0458641	0.046592	11:6306304:C:T-ENSG00000170955.10	-0.231711	-0.232259	-0.23342	-0.236816	-0.235268	0.213199	0.18861	0.198712	0.176722	0.157072
ENSG00000110395.8	CBL	11:119246696:C:T	0.00840996	0.576659	0.486447	0.515999	0.563995	11:119246696:C:T-ENSG00000110395.8	-0.183062	-0.0378197	-0.0576231	-0.0496921	-0.0441272	0.07178	0.0969715	0.072935	0.0730386	0.0754704
ENSG00000114423.23	CBLB	3:105820083:T:C	0.0517697	0.0429282	0.0570046	0.0560567	0.0431633	3:105820083:T:C-ENSG00000114423.23	0.12181	0.124031	0.1218	0.122271	0.124505	0.0938806	0.0737576	0.0952512	0.13395	0.0972762
ENSG00000241764.5	CBLL1-AS1	7:107743833:C:T	1.44042e-05	1.73103e-12	3.19199e-07	1.10813e-09	1.30121e-07	7:107743833:C:T-ENSG00000241764.5	0.513542	0.513925	0.513819	0.514029	0.513959	0.116356	0.089178	0.118929	0.116341	0.145075
ENSG00000139899.11	CBLN3	14:24434078:A:G	1.1821e-07	4.03115e-06	1.50849e-06	9.94821e-07	1.31097e-05	14:24434078:A:G-ENSG00000139899.11	0.531339	0.53127	0.53136	0.531398	0.531359	0.133088	0.157654	0.162025	0.135006	0.229496
ENSG00000159228.13	CBR1	21:36070334:G:C	9.39819e-11	3.29491e-10	2.024e-11	3.03642e-11	8.45317e-11	21:36070334:G:C-ENSG00000159228.13	-0.642841	-0.64286	-0.642876	-0.642888	-0.642887	0.109202	0.168865	0.13963	0.167022	0.176674
ENSG00000159231.6	CBR3	21:36135447:C:T	5.79024e-05	4.11384e-05	4.03059e-05	3.5889e-05	6.07099e-05	21:36135447:C:T-ENSG00000159231.6	-0.46183	-0.461973	-0.462119	-0.462253	-0.462081	0.183443	0.155244	0.148528	0.158214	0.182746
ENSG00000145439.12	CBR4	4:168988442:G:A	0.0476064	0.051395	0.0489817	0.0430197	0.0478919	4:168988442:G:A-ENSG00000145439.12	0.289097	0.288225	0.289111	0.291413	0.288988	0.212687	0.266754	0.237894	0.226695	0.184857
ENSG00000160200.18	CBS	21:43034831:C:CA	0.0598968	0.0600864	0.0426601	0.0287571	0.0351503	21:43034831:C:CA-ENSG00000160200.18	0.253861	0.25455	0.259145	0.267154	0.26214	0.18642	0.229168	0.204106	0.155144	0.174456
ENSG00000100307.13	CBX7	22:39172921:T:C	0.166914	0.018824	0.165813	0.162735	0.127819	22:39172921:T:C-ENSG00000100307.13	0.15132	0.196474	0.154455	0.155308	0.160739	0.146292	0.0974726	0.134637	0.143391	0.12323
ENSG00000100211.12	CBY1	22:38652876:CAA:C	0.278073	0.225446	0.370162	0.233633	0.0206762	22:38652876:CAA:C-ENSG00000100211.12	-0.211386	-0.242877	-0.164327	-0.236525	-0.41202	0.29741	0.252227	0.291623	0.250648	0.193976
ENSG00000188649.15	CC2D2B	10:95894472:T:G	0.00232003	0.00155717	0.00238206	0.00248378	0.00192819	10:95894472:T:G-ENSG00000188649.15	-0.542576	-0.543135	-0.542713	-0.542679	-0.542921	0.286616	0.226741	0.272983	0.29025	0.220313
ENSG00000158941.17	CCAR2	8:22584774:A:G	0.36044	0.301542	0.00520621	0.252701	0.377721	8:22584774:A:G-ENSG00000158941.17	0.0697798	0.0785328	0.176317	0.0913435	0.0660608	0.119726	0.0719868	0.0651608	0.0733141	0.082535
ENSG00000173581.8	CCDC106	19:55593194:C:G	0.0210906	0.00460899	0.0244349	0.0283009	0.0251041	19:55593194:C:G-ENSG00000173581.8	0.224735	0.230758	0.224246	0.223103	0.223985	0.123251	0.099851	0.116851	0.149148	0.130909
ENSG00000151773.13	CCDC122	13:43893074:A:G	0.000597164	0.000724977	0.000673066	0.000610361	0.000601727	13:43893074:A:G-ENSG00000151773.13	-0.414358	-0.414222	-0.414455	-0.414669	-0.414662	0.196995	0.187668	0.16014	0.148349	0.186928
ENSG00000007080.11	CCDC124	19:17935425:CT:C	0.0356172	0.0342051	0.0345417	0.0378868	0.0366054	19:17935425:CT:C-ENSG00000007080.11	-0.257818	-0.258685	-0.259314	-0.257731	-0.257976	0.181732	0.210968	0.157819	0.166887	0.210508
ENSG00000100147.14	CCDC134	22:41834345:TCA:T	0.00711511	0.0192386	0.0202465	0.0197668	0.0214355	22:41834345:TCA:T-ENSG00000100147.14	0.326622	0.321067	0.321574	0.321805	0.321108	0.177115	0.150851	0.184318	0.16969	0.225193
ENSG00000185298.13	CCDC137	17:81698409:G:A	0.0110405	4.87068e-05	0.010753	0.0112136	0.0121984	17:81698409:G:A-ENSG00000185298.13	-0.426606	-0.435052	-0.427018	-0.426762	-0.426462	0.1739	0.121986	0.169902	0.164489	0.209121
ENSG00000225611.3	CCDC13-AS2	3:42750974:T:TA	0.0515312	0.0288661	0.0491788	0.0533733	0.0573731	3:42750974:T:TA-ENSG00000225611.3	-0.246985	-0.254948	-0.249457	-0.247645	-0.245495	0.209124	0.137087	0.168052	0.240939	0.195377
ENSG00000135205.15	CCDC146	7:77083311:C:T	0.00824514	0.0146677	0.0154054	0.0149377	0.0157417	7:77083311:C:T-ENSG00000135205.15	0.262741	0.26044	0.260768	0.261178	0.260624	0.147101	0.157735	0.13476	0.15052	0.139905
ENSG00000149548.15	CCDC15	11:124948942:A:C	4.30272e-06	4.09814e-06	3.74687e-06	3.58375e-06	1.97681e-06	11:124948942:A:C-ENSG00000149548.15	0.535722	0.535745	0.535828	0.535874	0.535909	0.191407	0.162816	0.168891	0.180805	0.153338
ENSG00000198865.10	CCDC152	5:42799617:T:TTTA	0.0715297	0.0776693	0.0699471	0.0705349	0.0424958	5:42799617:T:TTTA-ENSG00000198865.10	0.20516	0.20386	0.206214	0.205771	0.213861	0.136185	0.18584	0.170397	0.18063	0.17642
ENSG00000197599.13	CCDC154	16:1448774:C:T	0.000942522	0.000661427	0.000350628	0.00038887	0.000361373	16:1448774:C:T-ENSG00000197599.13	0.588352	0.588543	0.588934	0.588865	0.588881	0.287838	0.262876	0.197173	0.249489	0.264901
ENSG00000187860.11	CCDC157	22:30388122:A:C	0.0888687	0.0825769	0.0774839	0.0375692	0.0550064	22:30388122:A:C-ENSG00000187860.11	0.215481	0.218413	0.218193	0.237603	0.22636	0.19081	0.206997	0.205158	0.144379	0.158545
ENSG00000183401.12	CCDC159	19:11302684:C:T	0.0523002	0.057431	0.0482008	0.0584537	0.054505	19:11302684:C:T-ENSG00000183401.12	0.168546	0.167288	0.17094	0.167434	0.168578	0.140442	0.122561	0.110899	0.137345	0.210724
ENSG00000280670.3	CCDC163	1:45513003:T:C	0	0	0	0	0	1:45513003:T:C-ENSG00000280670.3	-1.10986	-1.10986	-1.10986	-1.10986	-1.10986	0.118552	0.150762	0.108894	0.177214	0.148727
ENSG00000198937.9	CCDC167	6:37484078:G:T	2.28182e-08	2.55173e-06	2.0095e-10	1.14383e-07	7.94782e-11	6:37484078:G:T-ENSG00000198937.9	0.46826	0.468157	0.468504	0.468392	0.468606	0.124056	0.125026	0.0911903	0.10699	0.101953
ENSG00000228544.1	CCDC183-AS1	9:136808456:C:T	0.0101446	0.00945751	0.00677124	0.00737681	0.00787579	9:136808456:C:T-ENSG00000228544.1	0.304699	0.30518	0.307174	0.306243	0.30599	0.202989	0.167921	0.167717	0.130369	0.181431
ENSG00000223745.8	CCDC18-AS1	1:93311514:C:T	2.41751e-09	8.39e-09	5.9348e-09	9.10794e-10	5.29432e-10	1:93311514:C:T-ENSG00000223745.8	0.755755	0.755756	0.755761	0.755763	0.755765	0.18666	0.222342	0.210461	0.162725	0.196409
ENSG00000159214.13	CCDC24	1:43976849:A:C	0.0030082	0.00527384	0.000219978	0.00767245	0.00408531	1:43976849:A:C-ENSG00000159214.13	-0.472349	-0.470599	-0.477669	-0.469775	-0.471491	0.190327	0.198574	0.157977	0.224484	0.192412
ENSG00000147419.19	CCDC25	8:27728910:A:G	2.81679e-10	4.55042e-08	1.32763e-06	9.53482e-08	9.6785e-06	8:27728910:A:G-ENSG00000147419.19	0.496638	0.496601	0.496626	0.49667	0.496632	0.0990029	0.114549	0.150501	0.115726	0.173778
ENSG00000279968.3	CCDC28A-AS1	6:138778998:T:C	0.0207492	0.0352435	0.0330142	0.0357499	0.0401803	6:138778998:T:C-ENSG00000279968.3	0.382846	0.37636	0.378772	0.37696	0.375262	0.212096	0.341449	0.233078	0.258036	0.244124
ENSG00000186409.19	CCDC30	1:42461802:T:C	0.00971643	0.00958929	0.00995692	0.0100365	0.00234159	1:42461802:T:C-ENSG00000186409.19	-0.247254	-0.247303	-0.247467	-0.2478	-0.250397	0.149376	0.108779	0.127743	0.171374	0.100403
ENSG00000128891.17	CCDC32	15:40569865:C:T	1.4892e-09	3.98755e-10	2.5364e-11	1.81464e-08	1.23002e-12	15:40569865:C:T-ENSG00000128891.17	-0.693454	-0.69346	-0.693469	-0.693468	-0.693474	0.142974	0.169403	0.159401	0.195557	0.129741
ENSG00000176155.21	CCDC57	17:82224043:T:C	3.97873e-05	7.3578e-08	7.21269e-08	1.96019e-08	3.97238e-07	17:82224043:T:C-ENSG00000176155.21	-0.45215	-0.452465	-0.452601	-0.452818	-0.452574	0.161352	0.117763	0.115274	0.117411	0.11017
ENSG00000139537.11	CCDC65	12:48929743:G:C	0.0283562	0.0330292	0.0388284	0.037339	0.036879	12:48929743:G:C-ENSG00000139537.11	-0.411466	-0.40996	-0.409065	-0.409496	-0.409381	0.240294	0.252706	0.290696	0.392728	0.343806
ENSG00000180376.17	CCDC66	3:56575441:G:T	0.000600843	0.000630517	0.000618033	0.000779009	0.000670971	3:56575441:G:T-ENSG00000180376.17	0.481717	0.481747	0.481915	0.481768	0.481872	0.214639	0.214302	0.158896	0.222305	0.249935
ENSG00000198624.13	CCDC69	5:151223162:G:A	3.84886e-05	8.75391e-06	0.0001025	8.44856e-05	5.6778e-05	5:151223162:G:A-ENSG00000198624.13	-0.744265	-0.744336	-0.744224	-0.744238	-0.744258	0.279072	0.200657	0.357374	0.302678	0.282307
ENSG00000216937.14	CCDC7	10:32482439:G:T	0.0101253	0.0265359	0.0264691	0.0264693	0.0263316	10:32482439:G:T-ENSG00000216937.14	0.21056	0.205043	0.206237	0.206283	0.20635	0.11823	0.108971	0.124104	0.130673	0.129646
ENSG00000162004.19	CCDC78	16:719789:CA:C	0.714272	0.753193	0.772734	0.0218723	0.702641	16:719789:CA:C-ENSG00000162004.19	0.0404249	0.0212541	0.0154898	-0.493291	-0.0327053	0.19544	0.198383	0.188016	0.153396	0.165946
ENSG00000149231.16	CCDC82	11:96383280:T:C	1.45714e-05	1.51631e-05	1.93315e-05	1.62169e-05	1.25177e-05	11:96383280:T:C-ENSG00000149231.16	0.415013	0.415082	0.415145	0.415239	0.415305	0.152154	0.150944	0.15615	0.128138	0.12201
ENSG00000168071.22	CCDC88B	11:64375605:C:T	0.00234819	0.502037	0.510996	0.623943	0.585858	11:64375605:C:T-ENSG00000168071.22	0.191201	0.0455555	0.049021	-0.0151441	0.0306614	0.0592154	0.0937882	0.0796416	0.0903694	0.0829078
ENSG00000276085.1	CCL3L1	17:36195866:T:C	1.32852e-09	7.64163e-09	6.60586e-10	1.06469e-09	3.86945e-10	17:36195866:T:C-ENSG00000276085.1	0.780271	0.780271	0.780275	0.780276	0.780277	0.196886	0.196402	0.200682	0.187116	0.19804
ENSG00000276070.5	CCL4L2	17:36223006:G:A	0.00056585	0.000968031	0.000890443	0.000857147	0.000872382	17:36223006:G:A-ENSG00000276070.5	0.446318	0.446056	0.446317	0.446401	0.446416	0.158261	0.215902	0.192869	0.175514	0.229604
ENSG00000136280.17	CCM2	7:44986581:G:A	4.44498e-14	6.40576e-20	6.7717e-14	4.62995e-12	6.12534e-10	7:44986581:G:A-ENSG00000136280.17	0.49783	0.497882	0.497857	0.497898	0.497887	0.088464	0.0680675	0.0755968	0.0935945	0.111222
ENSG00000166946.14	CCNDBP1	15:43187130:C:T	0.87473	0.0279901	0.888654	0.874008	0.879032	15:43187130:C:T-ENSG00000166946.14	-0.0065982	0.269898	-0.000483229	-0.00361583	-0.00711029	0.109636	0.0959466	0.0929943	0.111263	0.104966
ENSG00000163660.12	CCNL1	3:157153027:A:G	0.000296782	0.000874378	0.000948357	0.0010076	0.000903977	3:157153027:A:G-ENSG00000163660.12	0.289498	0.288516	0.28901	0.288999	0.289063	0.132293	0.102009	0.126699	0.132044	0.107142
ENSG00000163823.4	CCR1	3:46227339:C:CCT	0.00433119	0.00386711	0.00666546	0.00736615	0.00184894	3:46227339:C:CCT-ENSG00000163823.4	0.306339	0.307159	0.305571	0.305295	0.309214	0.140347	0.125397	0.168385	0.146897	0.14097
ENSG00000121807.7	CCR2	3:46392828:G:A	0.0283069	0.0317175	0.0234235	0.0310927	0.0266439	3:46392828:G:A-ENSG00000121807.7	-0.231114	-0.230432	-0.234517	-0.230906	-0.232371	0.126525	0.175641	0.142872	0.190741	0.164688
ENSG00000183625.16	CCR3	3:46135140:C:T	0.00234293	0.00227662	0.00233253	0.00222262	0.0022472	3:46135140:C:T-ENSG00000183625.16	0.437839	0.437989	0.438155	0.43827	0.438159	0.208071	0.194629	0.222357	0.198487	0.2037
ENSG00000160791.14	CCR5	3:46370444:A:G	0.0124518	0.0105578	0.0111606	0.0103375	0.00553338	3:46370444:A:G-ENSG00000160791.14	0.28299	0.284353	0.284023	0.284864	0.286358	0.15413	0.148687	0.153847	0.183491	0.131655
ENSG00000173992.9	CCS	11:66604595:C:T	3.76553e-14	2.70628e-08	3.39252e-11	3.07693e-11	3.37297e-13	11:66604595:C:T-ENSG00000173992.9	0.465255	0.465076	0.465262	0.4653	0.465391	0.0894351	0.0993887	0.0860027	0.0842724	0.0855508
ENSG00000154429.11	CCSAP	1:229303834:A:T	4.2899e-05	2.92598e-05	3.8903e-05	8.35346e-05	5.17183e-05	1:229303834:A:T-ENSG00000154429.11	-0.53376	-0.533847	-0.533893	-0.53383	-0.533856	0.211599	0.169822	0.176243	0.235299	0.182544
ENSG00000166226.13	CCT2	12:69575230:G:T	0.109144	0.110064	0.113168	0.114308	0.0171937	12:69575230:G:T-ENSG00000166226.13	0.13854	0.138459	0.138057	0.138042	0.158927	0.109964	0.0910174	0.110371	0.132266	0.0857241
ENSG00000163468.15	CCT3	1:156337389:C:G	0.000131496	8.93012e-05	0.000121156	6.62361e-05	0.000204938	1:156337389:C:G-ENSG00000163468.15	-0.34868	-0.348858	-0.348879	-0.349554	-0.349014	0.186706	0.111781	0.120384	0.108268	0.180179
ENSG00000115484.15	CCT4	2:61873245:G:T	0.115562	0.112182	0.110997	0.120311	0.0485317	2:61873245:G:T-ENSG00000115484.15	0.189323	0.19075	0.190802	0.187846	0.206755	0.242401	0.174977	0.158562	0.193054	0.137087
ENSG00000146731.11	CCT6A	7:56011401:T:C	0.00406453	0.44466	0.487865	0.220829	0.0580708	7:56011401:T:C-ENSG00000146731.11	-0.412046	-0.0369242	-0.00335087	-0.111836	-0.314192	0.127102	0.131687	0.116294	0.140055	0.132991
ENSG00000132141.14	CCT6B	17:34962027:G:C	0.0263946	0.033422	0.0370821	0.034574	0.0310573	17:34962027:G:C-ENSG00000132141.14	0.433724	0.431318	0.430594	0.431541	0.432709	0.226295	0.336345	0.387658	0.347162	0.298205
ENSG00000290860.1	CCT6P3	7:64990333:A:T	1.26214e-15	4.54654e-15	2.83176e-16	1.73637e-15	1.96437e-28	7:64990333:A:T-ENSG00000290860.1	0.767626	0.767626	0.767628	0.767628	0.76763	0.117558	0.103981	0.110608	0.115886	0.0914464
ENSG00000156261.13	CCT8	21:29073627:G:A	2.81284e-08	1.11047e-09	1.59146e-11	1.19818e-10	4.16217e-11	21:29073627:G:A-ENSG00000156261.13	0.736231	0.736233	0.73624	0.736241	0.736242	0.250324	0.162241	0.153563	0.153004	0.179706
ENSG00000122674.12	CCZ1	7:5911301:G:A	0.0247159	0.0254365	0.0271111	0.0266478	0.0226472	7:5911301:G:A-ENSG00000122674.12	-0.360509	-0.360466	-0.360379	-0.360468	-0.361429	0.205698	0.220453	0.287755	0.272968	0.221045
ENSG00000146574.16	CCZ1B	7:6794326:T:C	0.00168971	0.0017031	0.0015431	0.00129862	0.00152467	7:6794326:T:C-ENSG00000146574.16	-0.38084	-0.380976	-0.38141	-0.381773	-0.381291	0.17583	0.182271	0.208889	0.159143	0.150257
ENSG00000170458.15	CD14	5:140628226:C:G	0.0143464	0.0154765	0.0130225	0.0161411	0.0153923	5:140628226:C:G-ENSG00000170458.15	0.158902	0.158887	0.160509	0.159179	0.159311	0.0881085	0.110786	0.0766059	0.127052	0.106405
ENSG00000177697.19	CD151	11:832889:AGGCCGGGGC:A	0	5.55112e-16	0	1.11022e-15	9.54792e-15	11:832889:AGGCCGGGGC:A-ENSG00000177697.19	-0.81863	-0.81863	-0.81863	-0.81863	-0.81863	0.116544	0.139226	0.109881	0.128	0.137946
ENSG00000117281.16	CD160	1:145728504:C:CT	0.000177328	0.000162744	0.000174658	0.000179625	0.000151428	1:145728504:C:CT-ENSG00000117281.16	0.624988	0.625036	0.625066	0.625073	0.6251	0.224522	0.238685	0.248902	0.287297	0.262635
ENSG00000177575.13	CD163	12:7470213:T:TC	0.0198742	0.0183758	0.0189546	0.016453	0.0180562	12:7470213:T:TC-ENSG00000177575.13	0.23987	0.240784	0.240844	0.242101	0.240941	0.147511	0.134834	0.162018	0.151475	0.151491
ENSG00000204936.10	CD177	19:43363506:G:A	0.00799869	0.00796246	0.00738891	0.00732232	0.00373635	19:43363506:G:A-ENSG00000204936.10	0.243624	0.243896	0.245155	0.245319	0.247073	0.109103	0.108	0.142792	0.153013	0.14475
ENSG00000134061.5	CD180	5:67168454:G:A	3.64414e-07	4.8677e-07	6.36359e-08	3.33663e-07	2.49499e-07	5:67168454:G:A-ENSG00000134061.5	0.793064	0.793065	0.793073	0.793071	0.793072	0.284684	0.337616	0.176562	0.220654	0.256153
ENSG00000116824.5	CD2	1:116770456:T:C	0.0433867	0.0323063	0.0467989	0.0426773	0.0483269	1:116770456:T:C-ENSG00000116824.5	-0.197523	-0.201565	-0.197938	-0.199482	-0.196974	0.124786	0.134205	0.153616	0.152292	0.163423
ENSG00000163606.11	CD200R1	3:112958191:C:T	0.0497499	0.0497357	0.0454318	0.0443998	0.00128306	3:112958191:C:T-ENSG00000163606.11	0.188155	0.189296	0.1928	0.194277	0.209583	0.0812687	0.0984093	0.11375	0.11044	0.0894965
ENSG00000122223.13	CD244	1:160882036:A:T	2.89458e-07	3.18714e-07	3.88758e-07	3.60185e-07	1.22065e-07	1:160882036:A:T-ENSG00000122223.13	-0.483102	-0.483163	-0.483209	-0.483298	-0.483368	0.13444	0.152785	0.127255	0.14767	0.130307
ENSG00000174807.4	CD248	11:66312552:A:G	0.00567151	0.00607751	0.00536206	0.00509539	0.00344449	11:66312552:A:G-ENSG00000174807.4	-0.270547	-0.270494	-0.271096	-0.271496	-0.271865	0.148273	0.183244	0.143815	0.150969	0.104431
ENSG00000139193.4	CD27	12:6481807:G:GT	0.0458822	0.022443	0.0539738	0.0572937	0.0617604	12:6481807:G:GT-ENSG00000139193.4	-0.306271	-0.317022	-0.304603	-0.303137	-0.300782	0.210239	0.165465	0.209685	0.229815	0.261232
ENSG00000120217.14	CD274	9:5458702:A:T	0.0984247	0.00347498	0.0915193	0.0904112	0.104752	9:5458702:A:T-ENSG00000120217.14	0.183638	0.214683	0.187724	0.189092	0.183167	0.0967721	0.0811125	0.129732	0.154742	0.159497
ENSG00000215039.9	CD27-AS1	12:6463421:G:C	0.00156651	0.00289719	0.00124228	0.0021742	0.00174587	12:6463421:G:C-ENSG00000215039.9	0.394664	0.393936	0.395591	0.394626	0.394987	0.158333	0.204134	0.145592	0.202784	0.200346
ENSG00000178562.18	CD28	2:203745281:A:G	0.74203	0.804662	0.696846	0.690903	0.0442359	2:203745281:A:G-ENSG00000178562.18	0.0123505	0.00308451	0.0182295	0.0185874	0.161004	0.0726469	0.0691659	0.084589	0.0673967	0.0809233
ENSG00000167850.4	CD300C	17:74573400:G:A	0.00246146	9.25597e-05	0.00246968	0.00264492	0.00227708	17:74573400:G:A-ENSG00000167850.4	-0.208942	-0.211782	-0.210098	-0.21002	-0.210869	0.0762885	0.0624907	0.0945338	0.0983797	0.107326
ENSG00000186407.7	CD300E	17:74641126:G:A	0.00221932	0.00525037	0.00581967	0.00657822	0.00589211	17:74641126:G:A-ENSG00000186407.7	-0.311018	-0.309368	-0.309627	-0.309276	-0.309786	0.14869	0.132649	0.130833	0.160381	0.182709
ENSG00000284690.3	CD300H	17:74554882:C:A	1.1069e-09	2.61139e-09	1.17676e-09	4.23787e-09	7.06417e-12	17:74554882:C:A-ENSG00000284690.3	0.655267	0.655271	0.65528	0.655288	0.655298	0.16423	0.166098	0.1367	0.168134	0.129827
ENSG00000178789.9	CD300LB	17:74500629:G:A	1.0331e-05	7.34831e-06	9.43533e-06	5.36651e-08	2.29042e-05	17:74500629:G:A-ENSG00000178789.9	-0.377348	-0.376919	-0.377359	-0.378784	-0.377543	0.157503	0.0886246	0.10094	0.0986034	0.115794
ENSG00000204345.1	CD300LD	17:74563582:ACACACT:A	8.67216e-17	2.19343e-13	1.00674e-13	1.7821e-15	4.04602e-15	17:74563582:ACACACT:A-ENSG00000204345.1	0.842373	0.842373	0.842373	0.842373	0.842373	0.138606	0.159825	0.138654	0.152809	0.155322
ENSG00000186074.19	CD300LF	17:74696903:TGTTTG:T	0.00140183	0.000116318	0.00342836	0.00761988	0.00444391	17:74696903:TGTTTG:T-ENSG00000186074.19	-0.395631	-0.397083	-0.3933	-0.391663	-0.393005	0.154568	0.113015	0.165091	0.177641	0.191588
ENSG00000241399.7	CD302	2:159748757:T:C	0.00013086	0.00028863	0.000131997	0.000180848	0.00018117	2:159748757:T:C-ENSG00000241399.7	-0.553577	-0.553447	-0.553738	-0.55361	-0.553604	0.200873	0.307254	0.208394	0.209803	0.194186
ENSG00000167775.11	CD320	19:8304467:T:C	2.98033e-05	6.32051e-05	8.39881e-05	6.29088e-05	7.39838e-05	19:8304467:T:C-ENSG00000167775.11	-0.460797	-0.460707	-0.460732	-0.460859	-0.460827	0.169027	0.181515	0.162894	0.139652	0.167917
ENSG00000104894.12	CD37	19:49333989:C:T	0.0409952	0.0379524	0.0386395	0.0379699	0.0221084	19:49333989:C:T-ENSG00000104894.12	-0.136769	-0.137906	-0.138054	-0.138163	-0.141685	0.102468	0.0783952	0.101612	0.0948252	0.0995979
ENSG00000004468.13	CD38	4:15783578:C:T	0.187042	0.0382765	0.179156	0.182235	0.159922	4:15783578:C:T-ENSG00000004468.13	0.239696	0.314838	0.247524	0.245823	0.249707	0.2868	0.177091	0.239864	0.248051	0.284904
ENSG00000167286.11	CD3D	11:118384563:G:A	0.0206279	0.0105197	0.0204873	0.0184421	0.0175183	11:118384563:G:A-ENSG00000167286.11	0.375061	0.379672	0.375755	0.376784	0.376624	0.21879	0.170521	0.244866	0.234304	0.254085
ENSG00000160654.11	CD3G	11:118384563:G:A	0.196623	0.0498455	0.173188	0.182113	0.146808	11:118384563:G:A-ENSG00000160654.11	0.18536	0.245245	0.197848	0.194386	0.201682	0.192234	0.14791	0.194677	0.282792	0.28308
ENSG00000010610.10	CD4	12:6797153:G:A	0.0954539	0.0375183	0.119204	0.128021	0.113832	12:6797153:G:A-ENSG00000010610.10	-0.137778	-0.15197	-0.135082	-0.132862	-0.135428	0.113147	0.0892032	0.121409	0.135174	0.140308
ENSG00000101017.15	CD40	20:46128574:A:G	0.0232295	0.0201838	0.0265947	0.0257236	0.0256044	20:46128574:A:G-ENSG00000101017.15	0.365119	0.366351	0.364888	0.36515	0.36486	0.212088	0.201118	0.283287	0.27257	0.232871
ENSG00000026508.21	CD44	11:35094754:C:A	0.0525387	0.0496321	0.0565462	0.0546933	0.0531143	11:35094754:C:A-ENSG00000026508.21	0.279384	0.280339	0.279351	0.279669	0.279659	0.220113	0.184158	0.246103	0.217748	0.25678
ENSG00000117335.21	CD46	1:207767846:G:T	0.716454	0.0166464	0.703831	0.717575	0.664159	1:207767846:G:T-ENSG00000117335.21	0.0218184	0.19898	0.0273356	0.0249873	0.0300784	0.0986514	0.073429	0.0787854	0.114789	0.133004
ENSG00000196776.17	CD47	3:108083896:CT:C	0.0184297	0.0155545	0.00983461	0.0243877	0.0240832	3:108083896:CT:C-ENSG00000196776.17	0.178536	0.179811	0.183199	0.177077	0.177143	0.131297	0.104715	0.084434	0.107701	0.107523
ENSG00000169442.9	CD52	1:26269589:G:A	0.000199363	0.00100817	0.00121515	0.00104505	0.000978302	1:26269589:G:A-ENSG00000169442.9	-0.395166	-0.394504	-0.394552	-0.39476	-0.3948	0.139793	0.173057	0.192639	0.158974	0.135975
ENSG00000143119.14	CD53	1:110902788:G:A	0.354536	0.316509	0.351071	0.000614494	0.3863	1:110902788:G:A-ENSG00000143119.14	-0.119584	-0.151453	-0.131853	-0.387726	-0.117253	0.0872917	0.105578	0.139465	0.112451	0.137615
ENSG00000196352.18	CD55	1:207337251:G:A	1.06895e-18	4.98412e-18	1.24543e-21	1.93578e-20	1.67404e-25	1:207337251:G:A-ENSG00000196352.18	0.731198	0.731198	0.731201	0.731202	0.731203	0.1029	0.089735	0.093613	0.0962869	0.0928006
ENSG00000013725.14	CD6	11:61000572:G:A	0.0154087	0.0107635	0.0155496	0.00499022	0.0155079	11:61000572:G:A-ENSG00000013725.14	0.201616	0.204287	0.202131	0.208298	0.202685	0.112805	0.100822	0.111721	0.0944271	0.141636
ENSG00000135404.12	CD63	12:55769452:C:G	0.767125	0.00122579	0.725682	0.690963	0.746	12:55769452:C:G-ENSG00000135404.12	0.00599055	0.150278	-0.00661206	-0.0138042	0.00606408	0.0714898	0.0392829	0.0648171	0.0714969	0.0684561
ENSG00000173762.8	CD7	17:82276688:C:T	0.000708003	0.000751256	0.000692257	0.000729887	0.000693126	17:82276688:C:T-ENSG00000173762.8	-0.579824	-0.579832	-0.579945	-0.579936	-0.579952	0.246476	0.287231	0.190389	0.331774	0.346842
ENSG00000019582.17	CD74	5:150398801:G:C	0.189996	0.187418	0.153014	0.146139	0.0328117	5:150398801:G:C-ENSG00000019582.17	0.101566	0.103378	0.108037	0.110116	0.134561	0.0970988	0.107121	0.097492	0.090858	0.0920064
ENSG00000085117.12	CD82	11:44594159:A:G	0.0201897	0.00853314	0.0154661	0.0125336	0.00548856	11:44594159:A:G-ENSG00000085117.12	0.218898	0.224327	0.221163	0.222485	0.225385	0.157329	0.103528	0.133559	0.115378	0.102811
ENSG00000066294.15	CD84	1:160610225:A:G	8.23489e-09	1.13462e-08	2.37401e-09	2.32959e-09	6.24411e-08	1:160610225:A:G-ENSG00000066294.15	-0.505777	-0.505812	-0.505912	-0.50594	-0.505894	0.126923	0.134953	0.122536	0.118466	0.138122
ENSG00000153563.17	CD8A	2:86826596:T:C	0.000799099	0.000826609	0.000720043	0.000711833	0.000619659	2:86826596:T:C-ENSG00000153563.17	0.35635	0.356484	0.357101	0.357167	0.357215	0.137002	0.150461	0.157907	0.16249	0.15069
ENSG00000172116.23	CD8B	2:86831882:A:C	1.23538e-05	1.82637e-05	1.51346e-05	1.40241e-05	1.47189e-05	2:86831882:A:C-ENSG00000172116.23	0.480689	0.48069	0.480882	0.480978	0.480958	0.129616	0.16309	0.170734	0.182366	0.213592
ENSG00000158825.6	CDA	1:20611143:G:C	4.94658e-07	7.88103e-07	7.56494e-07	9.56293e-07	7.41131e-07	1:20611143:G:C-ENSG00000158825.6	0.337166	0.336846	0.337174	0.337343	0.337326	0.128563	0.0895541	0.0910594	0.106564	0.0970884
ENSG00000151465.14	CDC123	10:12165888:A:T	0.119424	0.148247	0.0475832	0.125832	0.150898	10:12165888:A:T-ENSG00000151465.14	-0.149729	-0.139638	-0.175099	-0.14467	-0.138643	0.207825	0.153939	0.104223	0.119173	0.150094
ENSG00000130177.16	CDC16	13:114236830:G:A	1.4482e-30	1.69988e-25	1.45118e-21	4.09641e-25	1.21574e-25	13:114236830:G:A-ENSG00000130177.16	0.794495	0.794494	0.794495	0.794495	0.794495	0.0894278	0.0736574	0.108148	0.0940501	0.0936345
ENSG00000101224.18	CDC25B	20:3757030:T:C	0.0113754	0.00861757	0.0136353	0.0113684	0.0125806	20:3757030:T:C-ENSG00000101224.18	-0.136386	-0.138625	-0.136813	-0.138406	-0.137378	0.0613548	0.0847437	0.0885571	0.082859	0.0863253
ENSG00000176386.9	CDC26	9:113255917:G:C	0.0765481	0.0777988	0.0759335	0.0135051	0.0762374	9:113255917:G:C-ENSG00000176386.9	0.381029	0.380527	0.381543	0.430417	0.38096	0.253251	0.230293	0.296065	0.240653	0.236488
ENSG00000099804.9	CDC34	19:549595:T:C	0.0158838	0.219711	0.364459	0.45397	0.313449	19:549595:T:C-ENSG00000099804.9	0.348862	0.132338	-0.0672944	-0.0442998	-0.104653	0.145241	0.122827	0.188928	0.179131	0.169051
ENSG00000105401.9	CDC37	19:10468798:T:G	0.678456	0.551545	0.455052	0.0131282	0.659267	19:10468798:T:G-ENSG00000105401.9	-0.000133941	-0.0279997	0.0454407	0.212913	0.00492094	0.105898	0.101593	0.0930197	0.0715068	0.111485
ENSG00000070831.18	CDC42	1:22088292:G:T	0.0284201	0.0208545	0.0269995	0.0286359	0.0205392	1:22088292:G:T-ENSG00000070831.18	0.222038	0.2249	0.223063	0.2227	0.224805	0.19303	0.132387	0.119385	0.173192	0.135054
ENSG00000128283.7	CDC42EP1	22:37568292:C:G	1.30129e-12	7.66769e-11	1.32112e-07	3.13582e-12	1.23428e-10	22:37568292:C:G-ENSG00000128283.7	-0.663176	-0.663175	-0.663176	-0.663187	-0.663185	0.143331	0.14176	0.160942	0.120408	0.134854
ENSG00000163171.8	CDC42EP3	2:37769004:G:C	0.0580696	0.036017	0.0543552	0.072213	0.0500371	2:37769004:G:C-ENSG00000163171.8	-0.270966	-0.281306	-0.274706	-0.2668	-0.27433	0.273116	0.170754	0.206543	0.195371	0.20708
ENSG00000096401.8	CDC5L	6:44403977:C:T	0.055155	0.0440141	0.0319035	0.0457256	0.0505453	6:44403977:C:T-ENSG00000096401.8	-0.14373	-0.147782	-0.151488	-0.145669	-0.145002	0.131979	0.15562	0.0894112	0.082834	0.142716
ENSG00000097046.13	CDC7	1:91524930:T:C	0.00767362	0.00750808	0.00675903	0.00513092	0.00594156	1:91524930:T:C-ENSG00000097046.13	-0.379234	-0.379546	-0.3799	-0.381268	-0.380397	0.190697	0.219229	0.184715	0.188701	0.1972
ENSG00000164649.20	CDCA7L	7:21902051:A:C	0.0619264	0.0595677	0.0486991	0.0468494	0.0543026	7:21902051:A:C-ENSG00000164649.20	-0.218098	-0.219471	-0.223164	-0.222754	-0.219583	0.19694	0.223008	0.198037	0.150467	0.149406
ENSG00000260228.6	CDH13-AS2	16:83813732:C:T	0.0148126	0.000166025	0.0186323	0.0134267	0.0449066	16:83813732:C:T-ENSG00000260228.6	-0.399472	-0.416775	-0.39746	-0.400593	-0.386022	0.178516	0.12052	0.192691	0.162981	0.229752
ENSG00000148600.15	CDHR1	10:84155430:T:C	0.0327396	0.0485926	0.0468589	0.0476877	0.0409736	10:84155430:T:C-ENSG00000148600.15	-0.275023	-0.269862	-0.271311	-0.270853	-0.272985	0.174307	0.210777	0.208094	0.202686	0.177282
ENSG00000128536.16	CDHR3	7:105847416:A:C	0.129429	0.126645	0.118629	0.0462514	0.120089	7:105847416:A:C-ENSG00000128536.16	0.12846	0.12951	0.131676	0.162094	0.130943	0.105205	0.098667	0.130349	0.127647	0.153793
ENSG00000185324.22	CDK10	16:89688036:G:T	1.92905e-09	8.7973e-12	7.49623e-13	8.11055e-09	2.66349e-09	16:89688036:G:T-ENSG00000185324.22	-0.444972	-0.445062	-0.445098	-0.445005	-0.445141	0.129527	0.100077	0.0729458	0.0875845	0.112482
ENSG00000008128.23	CDK11A	1:1771047:TAAA:T	0.0246123	0.0502765	0.0436769	0.0468684	0.0483485	1:1771047:TAAA:T-ENSG00000008128.23	0.260864	0.251787	0.255651	0.253771	0.25345	0.158309	0.199545	0.179795	0.187623	0.159121
ENSG00000248333.9	CDK11B	1:1659220:A:G	1.14605e-09	1.08918e-08	2.51715e-07	3.79047e-07	1.07791e-08	1:1659220:A:G-ENSG00000248333.9	-0.39783	-0.397729	-0.397782	-0.397809	-0.397993	0.092787	0.0936408	0.107856	0.102799	0.095552
ENSG00000155111.15	CDK19	6:110816696:TAG:T	0.125882	0.0176871	0.109908	0.140613	0.0950618	6:110816696:TAG:T-ENSG00000155111.15	0.116562	0.146651	0.121669	0.115033	0.123356	0.0991056	0.0817678	0.0810466	0.101067	0.0832269
ENSG00000111328.7	CDK2AP1	12:123290580:G:A	5.61237e-08	1.42881e-08	2.52135e-08	1.33476e-08	1.07163e-09	12:123290580:G:A-ENSG00000111328.7	0.805813	0.805815	0.805816	0.805817	0.80582	0.246457	0.269352	0.214553	0.183366	0.184017
ENSG00000176749.9	CDK5R1	17:32490432:C:T	1.41156e-11	1.67184e-08	1.90974e-13	4.70209e-13	1.41257e-09	17:32490432:C:T-ENSG00000176749.9	0.585617	0.585617	0.585678	0.585683	0.585671	0.10643	0.142023	0.115197	0.107933	0.141425
ENSG00000124762.14	CDKN1A	6:36688479:C:T	0.0485041	0.0319501	0.0490264	0.0514248	0.0532746	6:36688479:C:T-ENSG00000124762.14	-0.250781	-0.25722	-0.251941	-0.251122	-0.249837	0.182724	0.169536	0.14709	0.238316	0.223494
ENSG00000129355.7	CDKN2D	19:10584044:G:A	0.00987115	0.00946144	0.00913769	0.00708479	0.00842777	19:10584044:G:A-ENSG00000129355.7	0.33102	0.331458	0.331698	0.332795	0.332078	0.183391	0.187236	0.212991	0.136584	0.254318
ENSG00000140743.8	CDR2	16:22416911:AT:A	0.00232905	0.00282697	0.00303711	0.00296694	0.00277345	16:22416911:AT:A-ENSG00000140743.8	-0.285558	-0.285363	-0.285808	-0.28586	-0.28611	0.111386	0.132808	0.161134	0.136076	0.17317
ENSG00000101290.14	CDS2	20:5131060:G:T	0.015822	0.0138818	0.0116471	0.0127005	0.0151879	20:5131060:G:T-ENSG00000101290.14	-0.401659	-0.402604	-0.404525	-0.403365	-0.401957	0.218018	0.209337	0.22135	0.236619	0.320625
ENSG00000091527.17	CDV3	3:133611099:G:A	0.00164377	0.00123104	0.00116189	0.000178612	0.00177291	3:133611099:G:A-ENSG00000091527.17	0.237444	0.23805	0.238694	0.240202	0.238007	0.118252	0.104534	0.116979	0.0698308	0.11189
ENSG00000007129.18	CEACAM21	19:41551536:T:C	1.5516e-08	1.71013e-09	1.0228e-09	4.0483e-09	2.75112e-11	19:41551536:T:C-ENSG00000007129.18	0.679818	0.679828	0.679841	0.679843	0.679852	0.151072	0.156463	0.182981	0.170852	0.148865
ENSG00000170956.17	CEACAM3	19:41838466:T:C	0.0243879	0.0244773	0.0249809	0.023843	0.0167766	19:41838466:T:C-ENSG00000170956.17	-0.217473	-0.217918	-0.217994	-0.218522	-0.220182	0.117303	0.151988	0.159641	0.1541	0.128918
ENSG00000105352.11	CEACAM4	19:41600522:G:C	0.0021665	0.0020356	0.00155945	0.00158402	0.00168749	19:41600522:G:C-ENSG00000105352.11	-0.214471	-0.214976	-0.216508	-0.216355	-0.215858	0.0973462	0.0965176	0.0998952	0.102225	0.104669
ENSG00000086548.9	CEACAM6	19:41761981:T:G	0.0119912	0.00972931	0.0148184	0.0139384	0.017258	19:41761981:T:G-ENSG00000086548.9	0.245336	0.246442	0.244979	0.245522	0.243981	0.147995	0.124696	0.133559	0.131829	0.16534
ENSG00000092067.7	CEBPE	14:23094686:A:C	0.0411291	0.0767671	0.18068	0.16527	0.176857	14:23094686:A:C-ENSG00000092067.7	0.290339	0.264533	0.22118	0.225747	0.220665	0.193912	0.208415	0.211997	0.247407	0.224313
ENSG00000115816.15	CEBPZ	2:37195826:AT:A	0.351801	0.296016	0.440684	0.305873	0.0100155	2:37195826:AT:A-ENSG00000115816.15	-0.10509	-0.13646	-0.0813136	-0.127698	-0.303532	0.109145	0.131731	0.139106	0.129658	0.129249
ENSG00000139610.2	CELA1	12:51306356:G:A	1.59647e-08	2.0414e-06	1.95921e-07	5.87806e-07	1.36467e-06	12:51306356:G:A-ENSG00000139610.2	0.557542	0.557475	0.557565	0.55755	0.557529	0.148724	0.156697	0.167888	0.15071	0.13666
ENSG00000186166.9	CENATAC	11:118991924:A:G	0.0272093	0.0389314	0.0587288	0.0065722	0.0554746	11:118991924:A:G-ENSG00000186166.9	0.244855	0.24006	0.233097	0.263271	0.234392	0.111025	0.174871	0.161852	0.119294	0.17354
ENSG00000255121.2	CENATAC-DT	11:119047102:T:G	0.712894	0.630027	0.688443	0.0175456	0.752442	11:119047102:T:G-ENSG00000255121.2	0.0162738	-0.0626633	0.0235286	0.423467	0.00222892	0.173603	0.173622	0.1755	0.128058	0.184291
ENSG00000177946.7	CENPBD1P	16:89965741:T:C	0.0236319	0.108618	0.0800938	0.0758534	0.102158	16:89965741:T:C-ENSG00000177946.7	-0.314343	-0.273791	-0.2868	-0.289059	-0.279463	0.173149	0.218101	0.216836	0.203422	0.26622
ENSG00000123219.13	CENPK	5:65578301:T:A	1.14282e-08	7.9339e-11	7.01402e-10	6.76634e-09	1.72311e-08	5:65578301:T:A-ENSG00000123219.13	-0.572422	-0.572473	-0.572497	-0.572502	-0.572506	0.128049	0.115423	0.138057	0.148852	0.176057
ENSG00000166451.14	CENPN	16:81045228:TA:T	0.00337818	0.00211195	0.00226805	0.00168344	0.00206934	16:81045228:TA:T-ENSG00000166451.14	-0.540009	-0.540864	-0.540724	-0.541382	-0.540854	0.26108	0.243129	0.27513	0.217623	0.291741
ENSG00000188312.14	CENPP	9:92302480:G:A	3.68398e-06	5.82068e-05	8.24914e-07	1.05059e-06	2.48848e-06	9:92302480:G:A-ENSG00000188312.14	0.427213	0.427009	0.427738	0.427729	0.427587	0.13812	0.136905	0.121457	0.121967	0.125088
ENSG00000031691.7	CENPQ	6:49492265:A:G	0.0152359	0.0668255	0.0809943	0.0553288	0.0756663	6:49492265:A:G-ENSG00000031691.7	0.280414	0.254978	0.251077	0.26441	0.253128	0.146982	0.180648	0.17366	0.169348	0.185262
ENSG00000166582.11	CENPV	17:16353372:G:GCGGAGGCCC	0.000141257	7.38587e-07	1.3513e-05	6.86555e-06	2.47567e-05	17:16353372:G:GCGGAGGCCC-ENSG00000166582.11	0.483756	0.484177	0.48407	0.484189	0.484076	0.193483	0.124909	0.157936	0.132278	0.155452
ENSG00000116198.14	CEP104	1:3848985:G:A	0.000477634	0.000341328	1.14147e-09	8.59661e-05	0.00024727	1:3848985:G:A-ENSG00000116198.14	0.520598	0.520822	0.522278	0.521303	0.521035	0.155731	0.179613	0.0963813	0.132249	0.165952
ENSG00000174799.12	CEP135	4:55947949:G:A	0.0652643	0.0438432	0.0653664	0.0744805	0.0651096	4:55947949:G:A-ENSG00000174799.12	0.153114	0.158787	0.154854	0.152071	0.153868	0.150197	0.105659	0.116186	0.122452	0.13268
ENSG00000099814.17	CEP170B	14:104823720:C:CA	0.0156288	0.0132647	0.0170241	0.0160504	0.0175564	14:104823720:C:CA-ENSG00000099814.17	-0.203793	-0.205145	-0.204478	-0.204873	-0.203972	0.108249	0.118512	0.140486	0.120012	0.137281
ENSG00000174007.9	CEP19	3:196708267:A:G	4.32581e-06	2.11771e-05	1.04679e-05	0.000260303	0.000276153	3:196708267:A:G-ENSG00000174007.9	-0.343377	-0.342891	-0.343418	-0.342829	-0.342951	0.115768	0.107916	0.0842271	0.128546	0.152844
ENSG00000101639.19	CEP192	18:12984145:C:A	8.88178e-16	3.60378e-10	1.01592e-08	1.11613e-07	2.92009e-10	18:12984145:C:A-ENSG00000101639.19	-0.522426	-0.522382	-0.522401	-0.52241	-0.52237	0.093729	0.11886	0.123657	0.135723	0.077954
ENSG00000126001.17	CEP250	20:35483335:A:T	0.0178493	0.017387	0.0106838	0.00952267	0.00934734	20:35483335:A:T-ENSG00000126001.17	0.18001	0.180659	0.182782	0.182832	0.182665	0.141523	0.141009	0.132693	0.0808278	0.091084
ENSG00000130695.16	CEP85	1:26234254:G:A	0.0350909	0.0363331	0.0337462	0.0246913	0.0310517	1:26234254:G:A-ENSG00000130695.16	0.174153	0.174118	0.174947	0.178444	0.175318	0.119513	0.12635	0.146581	0.125338	0.102034
ENSG00000258890.8	CEP95	17:64467935:CAAAAAAAAA:C	0.159967	0.0343225	0.141049	0.160208	0.134887	17:64467935:CAAAAAAAAA:C-ENSG00000258890.8	0.137478	0.173542	0.144712	0.139538	0.14333	0.154095	0.0996813	0.115726	0.146348	0.135648
ENSG00000182504.12	CEP97	3:101679281:A:AT	0.00874585	0.0175444	0.0189421	0.0195999	0.0184216	3:101679281:A:AT-ENSG00000182504.12	-0.252591	-0.249706	-0.250116	-0.249804	-0.250199	0.129474	0.148393	0.150284	0.156845	0.131639
ENSG00000167123.20	CERCAM	9:128434416:C:T	1.31827e-05	1.24305e-05	1.48569e-05	1.29672e-05	1.56669e-05	9:128434416:C:T-ENSG00000167123.20	0.510623	0.510672	0.510713	0.510771	0.510746	0.194583	0.174313	0.172411	0.146281	0.191736
ENSG00000100422.14	CERK	22:46727380:T:C	0.0564437	0.0779388	0.0334659	0.0516961	0.0679995	22:46727380:T:C-ENSG00000100422.14	0.205402	0.198563	0.218769	0.207013	0.201697	0.14884	0.18133	0.139351	0.140077	0.176009
ENSG00000259577.2	CERNA1	15:52192644:G:C	0.000861523	0.000668259	0.000316016	0.00381355	0.00322509	15:52192644:G:C-ENSG00000259577.2	-0.486748	-0.487323	-0.488481	-0.485183	-0.485428	0.203802	0.211387	0.15708	0.230239	0.214676
ENSG00000090661.12	CERS4	19:8209370:A:G	0.000232284	0.000191279	0.000296711	0.000178743	0.000275748	19:8209370:A:G-ENSG00000090661.12	0.296299	0.296764	0.296436	0.297408	0.296564	0.126122	0.119097	0.117976	0.106381	0.108514
ENSG00000139624.14	CERS5	12:50157165:G:A	0.173103	0.200142	0.00827533	0.128275	0.0909568	12:50157165:G:A-ENSG00000139624.14	0.172945	0.164787	0.273431	0.185957	0.210606	0.162221	0.15332	0.113686	0.126727	0.139079
ENSG00000172292.15	CERS6	2:168475573:T:C	0.0446589	0.0106732	0.0567843	0.0496117	0.0502918	2:168475573:T:C-ENSG00000172292.15	0.23606	0.247682	0.232916	0.235429	0.23467	0.166612	0.111618	0.16124	0.153033	0.160146
ENSG00000113163.19	CERT1	5:75491485:T:C	0.518621	0.157996	0.0462598	0.124415	0.16148	5:75491485:T:C-ENSG00000113163.19	-0.00136351	-0.0824597	-0.158919	0.154315	-0.0989681	0.118946	0.0872693	0.0708127	0.100715	0.116375
ENSG00000198848.13	CES1	16:55844923:C:T	0.011366	0.0115818	0.0125264	0.011758	0.0116954	16:55844923:C:T-ENSG00000198848.13	-0.515541	-0.515549	-0.515434	-0.515729	-0.515594	0.289422	0.27516	0.312839	0.338292	0.306805
ENSG00000087237.12	CETP	16:56977036:T:G	0.0140515	0.00728533	0.00182426	0.00106085	0.00303875	16:56977036:T:G-ENSG00000087237.12	0.309776	0.312693	0.318785	0.320644	0.316216	0.140052	0.149566	0.140586	0.121769	0.169008
ENSG00000160226.16	CFAP410	21:44339162:C:T	6.96449e-13	1.79458e-11	3.86992e-10	3.09433e-12	1.31056e-10	21:44339162:C:T-ENSG00000160226.16	0.52911	0.529113	0.529132	0.529178	0.529192	0.102991	0.108021	0.108084	0.0985079	0.140486
ENSG00000206530.11	CFAP44	3:113445262:A:G	0.0634442	0.0552815	0.0462076	0.0466665	0.0327117	3:113445262:A:G-ENSG00000206530.11	-0.170361	-0.17385	-0.175166	-0.174996	-0.179165	0.134157	0.145163	0.10496	0.12801	0.162263
ENSG00000213085.10	CFAP45	1:159887541:A:G	0.00108964	0.00133868	0.00226135	0.00240115	0.00204174	1:159887541:A:G-ENSG00000213085.10	0.306302	0.306092	0.305604	0.305573	0.30594	0.149183	0.116027	0.137823	0.133203	0.142423
ENSG00000120051.15	CFAP58	10:104392353:T:A	0.0496781	0.146652	0.137369	0.161657	0.120276	10:104392353:T:A-ENSG00000120051.15	0.174375	0.139529	0.143944	0.136576	0.148398	0.143639	0.133097	0.13463	0.16609	0.104266
ENSG00000231233.3	CFAP58-DT	10:104331337:G:A	0.447182	0.000229104	0.448049	0.453893	0.434855	10:104331337:G:A-ENSG00000231233.3	0.116987	0.250674	0.118332	0.116999	0.120324	0.105245	0.0670696	0.123776	0.138398	0.131632
ENSG00000114656.13	CFAP92	3:129005965:C:A	0.059058	0.0465515	0.0312855	0.056651	0.0395888	3:129005965:C:A-ENSG00000114656.13	0.185259	0.189244	0.195596	0.186087	0.191559	0.206233	0.128729	0.10627	0.143951	0.164986
ENSG00000283361.3	CFAP97D2	13:114112100:A:AC	2.85342e-06	1.84734e-06	1.37845e-06	1.70826e-06	1.69369e-06	13:114112100:A:AC-ENSG00000283361.3	0.550794	0.550857	0.550956	0.550945	0.550958	0.157405	0.179111	0.168683	0.164052	0.196358
ENSG00000197766.9	CFD	19:877437:G:C	2.80837e-07	5.0082e-07	4.20294e-07	4.41333e-07	2.00796e-07	19:877437:G:C-ENSG00000197766.9	0.655787	0.655788	0.655805	0.65581	0.655824	0.208901	0.225597	0.195073	0.171822	0.183311
ENSG00000165410.15	CFL2	14:34713142:GA:G	5.35553e-07	1.87766e-06	1.82571e-06	6.41441e-07	4.86468e-09	14:34713142:GA:G-ENSG00000165410.15	0.514789	0.514751	0.514858	0.514922	0.515046	0.160219	0.133865	0.151942	0.139543	0.110578
ENSG00000003402.21	CFLAR	2:201147855:G:A	0.00316936	0.00353777	0.00369224	0.00213619	0.00698252	2:201147855:G:A-ENSG00000003402.21	-0.200763	-0.200699	-0.201151	-0.203796	-0.199511	0.0859251	0.0931016	0.0968233	0.101873	0.108339
ENSG00000167670.16	CHAF1A	19:4381252:CCTCT:C	0.537981	0.0167195	0.420914	0.258468	0.324724	19:4381252:CCTCT:C-ENSG00000167670.16	-0.0280213	0.417957	-0.0641446	-0.166731	-0.133324	0.174321	0.148315	0.167675	0.149465	0.166831
ENSG00000106153.13	CHCHD2	7:56061818:A:G	1.92956e-05	2.14703e-05	2.16595e-05	2.95213e-05	2.40388e-06	7:56061818:A:G-ENSG00000106153.13	-0.573083	-0.573108	-0.573145	-0.573135	-0.573275	0.197349	0.230879	0.191558	0.166224	0.162852
ENSG00000235084.3	CHCHD2P6	1:15584854:G:A	0.555875	0.224522	0.0354311	0.392307	0.485284	1:15584854:G:A-ENSG00000235084.3	-0.00427955	0.21905	-0.462322	-0.0684732	-0.0315239	0.189295	0.207461	0.175851	0.213297	0.227738
ENSG00000248489.4	CHD1-DT	5:98948530:C:G	0.44663	0.383091	0.346753	0.459665	0.0293546	5:98948530:C:G-ENSG00000248489.4	-0.0472135	0.0824595	0.16327	0.0605508	-0.440189	0.165491	0.194019	0.19288	0.208376	0.172467
ENSG00000173575.24	CHD2	15:92932760:T:G	0.0374213	0.028371	0.0332354	0.0344384	0.0336458	15:92932760:T:G-ENSG00000173575.24	0.170245	0.173324	0.172088	0.1716	0.17155	0.186569	0.127895	0.093686	0.113247	0.126936
ENSG00000170004.19	CHD3	17:7889980:T:C	0.00136879	0.0012611	0.00129355	0.0013396	0.00147358	17:7889980:T:C-ENSG00000170004.19	0.419654	0.419913	0.420087	0.420066	0.419892	0.184501	0.204095	0.159247	0.194815	0.199973
ENSG00000124177.16	CHD6	20:41601580:G:A	0.046964	0.0626259	0.112979	0.115194	0.118369	20:41601580:G:A-ENSG00000124177.16	-0.169517	-0.163428	-0.153968	-0.153144	-0.151687	0.130305	0.125372	0.120253	0.202691	0.127338
ENSG00000133048.13	CHI3L1	1:203176537:T:G	2.97144e-05	3.16189e-05	1.20406e-05	1.89156e-05	1.20652e-05	1:203176537:T:G-ENSG00000133048.13	0.601874	0.601891	0.601999	0.601973	0.602005	0.245847	0.246013	0.169512	0.212259	0.19877
ENSG00000064886.14	CHI3L2	1:111198566:C:T	6.35057e-10	1.13308e-09	3.20628e-09	9.58626e-10	1.01794e-09	1:111198566:C:T-ENSG00000064886.14	0.953506	0.953506	0.953507	0.953507	0.953507	0.223779	0.234785	0.271675	0.27535	0.248952
ENSG00000109220.11	CHIC2	4:54052123:C:CCTT	0.00343874	0.00356592	0.00255718	0.00352817	0.00428335	4:54052123:C:CCTT-ENSG00000109220.11	-0.22245	-0.222496	-0.223669	-0.222902	-0.222404	0.128142	0.124337	0.0810736	0.115519	0.128743
ENSG00000254413.8	CHKB-CPT1B	22:50625611:G:C	0.326949	0.161554	0.0331618	0.215324	0.302717	22:50625611:G:C-ENSG00000254413.8	0.119167	0.185712	0.29651	0.158313	0.125051	0.213314	0.173576	0.14659	0.177682	0.204214
ENSG00000205559.5	CHKB-DT	22:50580713:G:T	0.0495005	0.0539441	0.0457268	0.0478755	0.0468845	22:50580713:G:T-ENSG00000205559.5	0.48363	0.482048	0.485742	0.483896	0.484029	0.42277	0.506034	0.360613	0.347492	0.396223
ENSG00000131165.16	CHMP1A	16:89678643:G:A	0.326091	0.350771	0.339724	0.327873	0.0372828	16:89678643:G:A-ENSG00000131165.16	0.0926518	0.0882253	0.0897127	0.0929216	0.169687	0.103685	0.125897	0.128179	0.111529	0.1089
ENSG00000083937.10	CHMP2B	3:87255411:G:A	0.00438352	0.00453951	0.00422237	0.00366183	0.00457833	3:87255411:G:A-ENSG00000083937.10	0.261091	0.26098	0.261775	0.262386	0.261417	0.148642	0.118227	0.131682	0.120285	0.147031
ENSG00000101421.4	CHMP4B	20:33811394:C:G	0.00466559	0.00780057	0.00885128	0.00885548	0.00772055	20:33811394:C:G-ENSG00000101421.4	-0.144762	-0.142953	-0.143266	-0.14393	-0.144748	0.0735983	0.0635635	0.0666078	0.0932548	0.102031
ENSG00000106069.26	CHN2	7:29146960:A:G	9.60115e-08	6.91393e-06	4.84688e-06	6.72322e-06	8.33783e-06	7:29146960:A:G-ENSG00000106069.26	0.416749	0.416391	0.416688	0.416807	0.416583	0.108368	0.112873	0.126168	0.167503	0.106732
ENSG00000110172.12	CHORDC1	11:90222222:G:T	0.0071429	0.49046	0.502495	0.484835	0.512912	11:90222222:G:T-ENSG00000110172.12	0.276996	0.0925717	0.0886763	0.0955103	0.0867695	0.115578	0.149229	0.102302	0.112821	0.136256
ENSG00000033100.17	CHPF2	7:151209468:C:T	0.00584913	0.0109235	0.0120464	0.0110645	0.0110447	7:151209468:C:T-ENSG00000033100.17	0.357019	0.355062	0.355147	0.355811	0.355743	0.153827	0.17306	0.199021	0.225511	0.233152
ENSG00000111666.11	CHPT1	12:101719954:T:TTAAA	0.0491631	0.0449125	0.0423852	0.0417633	0.00865523	12:101719954:T:TTAAA-ENSG00000111666.11	-0.194056	-0.195671	-0.196666	-0.197356	-0.205328	0.136755	0.106391	0.137088	0.169183	0.0958805
ENSG00000120903.13	CHRNA2	8:27440077:G:A	0.01946	0.0168986	0.0192335	0.0194341	0.0182408	8:27440077:G:A-ENSG00000120903.13	0.345157	0.346231	0.345885	0.345717	0.345869	0.22745	0.184685	0.209952	0.228548	0.210115
ENSG00000169684.13	CHRNA5	15:78548878:T:C	8.13585e-05	5.77473e-05	8.63678e-05	9.41416e-05	8.66946e-05	15:78548878:T:C-ENSG00000169684.13	-0.553658	-0.553756	-0.553758	-0.553766	-0.55376	0.199102	0.193562	0.221692	0.240413	0.188184
ENSG00000108556.10	CHRNE	17:4936105:C:G	0.000489176	0.000234371	0.000459143	0.000460218	0.00040288	17:4936105:C:G-ENSG00000108556.10	0.581748	0.582081	0.581878	0.581906	0.581958	0.215133	0.220889	0.232833	0.24922	0.281595
ENSG00000223960.9	CHROMR	2:178389603:T:C	0.127583	0.131734	0.134007	0.148515	0.0352627	2:178389603:T:C-ENSG00000223960.9	0.202363	0.201693	0.200368	0.195545	0.23235	0.218654	0.180258	0.164263	0.222994	0.136923
ENSG00000171310.11	CHST11	12:104479834:T:C	0.0641593	0.0682116	0.0623594	0.0374717	0.0537667	12:104479834:T:C-ENSG00000171310.11	-0.126364	-0.12551	-0.126425	-0.133709	-0.128017	0.123478	0.0994754	0.113259	0.0982204	0.0801168
ENSG00000180767.11	CHST13	3:126541787:A:G	8.95103e-08	2.42673e-07	3.6457e-07	1.26839e-07	1.1785e-07	3:126541787:A:G-ENSG00000180767.11	-0.861664	-0.861663	-0.861665	-0.861667	-0.861667	0.22905	0.295993	0.317845	0.234062	0.253124
ENSG00000182022.18	CHST15	10:124080706:G:T	0.0205906	0.0210036	0.0137531	0.0160425	0.0172318	10:124080706:G:T-ENSG00000182022.18	0.217283	0.217381	0.220516	0.219149	0.218655	0.149786	0.140742	0.114859	0.120647	0.149826
ENSG00000131873.7	CHSY1	15:101210254:C:T	0.000224312	0.000311247	0.000150745	9.19114e-05	0.000149436	15:101210254:C:T-ENSG00000131873.7	-0.535629	-0.535578	-0.535806	-0.535997	-0.535831	0.319172	0.244101	0.194963	0.166847	0.188453
ENSG00000125954.13	CHURC1-FNTB	14:64933351:C:T	2.53293e-10	1.9984e-15	2.42462e-12	0	0	14:64933351:C:T-ENSG00000125954.13	-0.830573	-0.830574	-0.830574	-0.830574	-0.830574	0.175799	0.131361	0.14211	0.121888	0.108849
ENSG00000103245.14	CIAO3	16:733173:T:C	1.82875e-07	2.91409e-14	6.60375e-07	1.1423e-08	2.02623e-08	16:733173:T:C-ENSG00000103245.14	0.495127	0.495414	0.49515	0.495277	0.495317	0.117403	0.0901676	0.0990019	0.0950475	0.109765
ENSG00000185043.13	CIB1	15:90231755:G:A	5.89025e-10	4.55996e-08	7.81291e-16	3.77892e-11	1.82786e-09	15:90231755:G:A-ENSG00000185043.13	0.561594	0.56155	0.561698	0.561679	0.561676	0.131525	0.106523	0.0859621	0.112446	0.135532
ENSG00000136425.14	CIB2	15:78098072:T:C	0.0295	0.478967	0.49642	0.495714	0.445214	15:78098072:T:C-ENSG00000136425.14	0.268128	0.0930331	0.0911587	0.0913444	0.111346	0.131523	0.205376	0.207689	0.181166	0.196541
ENSG00000136305.12	CIDEB	14:24285857:C:A	0.0497205	0.0214935	0.0512854	0.043137	0.0446136	14:24285857:C:A-ENSG00000136305.12	-0.318409	-0.331468	-0.318851	-0.322435	-0.320419	0.25773	0.175761	0.246747	0.208031	0.216329
ENSG00000138433.16	CIR1	2:174346448:C:T	0.0159318	0.0096548	0.00154793	3.0535e-05	0.010313	2:174346448:C:T-ENSG00000138433.16	0.351509	0.354126	0.360086	0.363737	0.354224	0.229681	0.190845	0.119262	0.0906403	0.173966
ENSG00000122873.12	CISD1	10:58252470:T:C	1.09612e-06	1.93542e-06	9.30862e-07	7.6005e-06	3.22497e-08	10:58252470:T:C-ENSG00000122873.12	-0.518136	-0.518129	-0.518326	-0.518283	-0.51848	0.134799	0.123598	0.176106	0.171784	0.137893
ENSG00000145354.12	CISD2	4:102871096:G:A	0.038336	0.0353775	0.0372058	0.033727	0.033374	4:102871096:G:A-ENSG00000145354.12	0.398714	0.400013	0.399362	0.400677	0.400091	0.341903	0.265734	0.299321	0.291313	0.249593
ENSG00000179862.7	CITED4	1:40891322:T:TACAC	0.0311328	0.0185458	0.0315177	0.0305201	0.0274011	1:40891322:T:TACAC-ENSG00000179862.7	-0.180579	-0.184561	-0.18158	-0.1819	-0.182312	0.120558	0.0999033	0.137562	0.123974	0.117633
ENSG00000136108.15	CKAP2	13:52413342:G:C	2.84773e-06	2.91624e-07	8.03444e-06	2.60659e-06	3.33662e-07	13:52413342:G:C-ENSG00000136108.15	-0.523906	-0.524047	-0.524009	-0.524058	-0.524145	0.146338	0.140724	0.181099	0.154577	0.144517
ENSG00000254788.7	CKLF-CMTM1	16:66562091:C:CT	0.599946	0.523782	0.445741	0.0134862	0.262307	16:66562091:C:CT-ENSG00000254788.7	-0.00731274	0.0362565	0.0665836	0.537231	-0.231249	0.170333	0.193058	0.17697	0.176716	0.17147
ENSG00000247572.9	CKMT2-AS1	5:81304800:C:G	4.03262e-09	1.62126e-11	1.27947e-11	1.11022e-14	4.89463e-10	5:81304800:C:G-ENSG00000247572.9	-0.951809	-0.951809	-0.95181	-0.95181	-0.95181	0.23351	0.194425	0.190733	0.169759	0.222426
ENSG00000104859.15	CLASRP	19:45038140:G:T	0.0246197	0.0624168	0.0439072	0.0641883	0.0605703	19:45038140:G:T-ENSG00000104859.15	-0.215814	-0.202135	-0.21042	-0.202482	-0.204136	0.12971	0.161924	0.115535	0.179658	0.188855
ENSG00000103249.19	CLCN7	16:1459122:G:A	1.30517e-10	7.1698e-07	1.15064e-08	8.0701e-12	7.69349e-11	16:1459122:G:A-ENSG00000103249.19	-0.532583	-0.532517	-0.53257	-0.532681	-0.532666	0.142343	0.140042	0.102039	0.103913	0.110259
ENSG00000106404.14	CLDN15	7:101246971:A:T	0.00492429	0.00718703	0.00793776	0.00613739	0.00656531	7:101246971:A:T-ENSG00000106404.14	0.58562	0.584461	0.584266	0.585353	0.584939	0.243564	0.397408	0.351565	0.316041	0.367909
ENSG00000253958.2	CLDN23	8:8686333:G:A	0.0194087	0.0209413	0.0171645	0.0174478	0.0163547	8:8686333:G:A-ENSG00000253958.2	-0.286084	-0.285754	-0.287177	-0.287104	-0.287181	0.195861	0.229977	0.141823	0.21386	0.156386
ENSG00000080822.17	CLDND1	3:98518097:C:T	0.671374	0.70444	0.719746	0.688411	0.00656849	3:98518097:C:T-ENSG00000080822.17	0.0387974	0.033746	0.0291291	0.0368838	0.218489	0.0901053	0.0945232	0.115039	0.0851875	0.0830601
ENSG00000172322.14	CLEC12A	12:9973650:G:T	1.8949e-36	1.64433e-27	6.21892e-27	2.02706e-24	4.30856e-36	12:9973650:G:T-ENSG00000172322.14	0.896592	0.896592	0.896592	0.896592	0.896592	0.0887837	0.0901745	0.0966356	0.103708	0.0812784
ENSG00000256660.7	CLEC12B	12:9973650:G:T	4.62306e-22	2.0063e-19	2.88735e-21	1.2122e-17	2.16054e-25	12:9973650:G:T-ENSG00000256660.7	0.787948	0.787948	0.787949	0.787949	0.787949	0.110597	0.107906	0.100844	0.11134	0.089941
ENSG00000157322.18	CLEC18A	16:69996200:G:A	1.07377e-08	6.14619e-13	5.00863e-09	9.60733e-09	2.68518e-08	16:69996200:G:A-ENSG00000157322.18	-0.830711	-0.830713	-0.830713	-0.830713	-0.830713	0.165384	0.144234	0.217377	0.244018	0.256512
ENSG00000140839.13	CLEC18B	16:74445796:C:T	0.0189853	0.0228209	0.0261209	0.0273205	0.0237899	16:74445796:C:T-ENSG00000140839.13	0.291918	0.290736	0.29062	0.290069	0.291077	0.171998	0.174357	0.209888	0.219221	0.162902
ENSG00000165682.15	CLEC1B	12:10010203:T:A	0.00559411	0.00536257	0.0049121	0.0049707	0.00522733	12:10010203:T:A-ENSG00000165682.15	-0.421558	-0.42188	-0.422341	-0.42234	-0.422047	0.182148	0.232629	0.188173	0.274895	0.261688
ENSG00000110852.5	CLEC2B	12:9866772:T:TA	0.0178403	0.0088877	0.0197864	0.0196942	0.0185861	12:9866772:T:TA-ENSG00000110852.5	-0.264263	-0.267828	-0.264446	-0.264655	-0.264746	0.142753	0.132507	0.154154	0.18246	0.153758
ENSG00000236279.7	CLEC2L	7:139568783:G:A	0.0226121	0.0230304	0.0225567	0.0216074	0.02047	7:139568783:G:A-ENSG00000236279.7	0.421903	0.421934	0.42219	0.4225	0.422592	0.2645	0.27135	0.249677	0.316438	0.263797
ENSG00000198178.11	CLEC4C	12:7727955:C:T	4.71681e-07	9.38e-07	9.93861e-07	1.03914e-06	1.08177e-06	12:7727955:C:T-ENSG00000198178.11	-0.555766	-0.555766	-0.555814	-0.555835	-0.55583	0.141605	0.174277	0.178054	0.183512	0.174407
ENSG00000166527.8	CLEC4D	12:8525323:T:C	1.65186e-06	7.4145e-06	1.06064e-05	1.14434e-05	8.15826e-06	12:8525323:T:C-ENSG00000166527.8	0.444975	0.444922	0.445028	0.445063	0.445102	0.112533	0.138951	0.173577	0.159938	0.14103
ENSG00000166523.8	CLEC4E	12:8542421:A:G	0.000807251	0.000724778	0.000812388	0.000726315	0.000756297	12:8542421:A:G-ENSG00000166523.8	0.532031	0.532162	0.532177	0.532315	0.532252	0.222758	0.20176	0.237355	0.222345	0.312574
ENSG00000152672.8	CLEC4F	2:70829784:T:C	0.00238723	0.00241366	0.00252611	0.00213881	0.00220118	2:70829784:T:C-ENSG00000152672.8	0.280202	0.28037	0.280399	0.281219	0.280888	0.14103	0.137192	0.127877	0.122737	0.131654
ENSG00000291059.1	CLEC4OP	19:15838946:G:A	0.000561826	0.000572983	0.000651537	0.000608681	0.000565177	19:15838946:G:A-ENSG00000291059.1	0.504568	0.504605	0.50463	0.504731	0.50475	0.221475	0.197979	0.21193	0.211339	0.21833
ENSG00000258227.7	CLEC5A	7:141929880:G:A	0.0403378	0.036687	0.0428292	0.0400015	0.0507988	7:141929880:G:A-ENSG00000258227.7	0.207119	0.208844	0.208509	0.209828	0.20454	0.117499	0.129351	0.196471	0.21057	0.213171
ENSG00000172243.18	CLEC7A	12:10086957:G:C	0.0370201	0.00594778	0.0384154	0.0553031	0.0402014	12:10086957:G:C-ENSG00000172243.18	0.328746	0.348333	0.328023	0.321298	0.326742	0.226796	0.155754	0.168867	0.196079	0.18765
ENSG00000197992.7	CLEC9A	12:10012994:T:G	8.9605e-05	5.39275e-06	6.31852e-05	6.47025e-05	0.00015877	12:10012994:T:G-ENSG00000197992.7	0.448603	0.449049	0.448864	0.44898	0.448794	0.158629	0.122939	0.138324	0.163999	0.169323
ENSG00000184293.9	CLECL1P	12:9703362:T:G	0.00177987	0.00215274	0.00189397	0.00198586	0.000583217	12:9703362:T:G-ENSG00000184293.9	0.429871	0.429662	0.430017	0.430068	0.431031	0.182127	0.196318	0.179614	0.215037	0.157166
ENSG00000162994.16	CLHC1	2:55224878:C:T	6.08631e-14	1.17661e-12	5.04659e-14	1.37835e-13	4.27441e-12	2:55224878:C:T-ENSG00000162994.16	0.787063	0.787063	0.787064	0.787064	0.787064	0.154366	0.147954	0.147578	0.157176	0.160253
ENSG00000213719.8	CLIC1	6:31711842:GAC:G	0.0228408	0.898692	0.871972	0.892282	0.890932	6:31711842:GAC:G-ENSG00000213719.8	-0.274031	0.00324645	0.00898828	0.00209488	-0.00386447	0.100727	0.110286	0.14824	0.11639	0.13305
ENSG00000169583.13	CLIC3	9:136946760:T:C	0.0265665	0.028244	0.027965	0.0250519	0.0276457	9:136946760:T:C-ENSG00000169583.13	0.35477	0.354403	0.354668	0.355826	0.354609	0.243443	0.260282	0.199188	0.212002	0.285618
ENSG00000013441.17	CLK1	2:200881958:C:CA	0.0180154	0.0247669	0.0132979	0.0269054	0.0101005	2:200881958:C:CA-ENSG00000013441.17	-0.190057	-0.188177	-0.192843	-0.187876	-0.193706	0.115899	0.134167	0.0861017	0.198866	0.108023
ENSG00000113240.14	CLK4	5:178624072:T:C	0.00269906	0.00908262	0.00882946	0.00915739	0.00826936	5:178624072:T:C-ENSG00000113240.14	0.325438	0.322235	0.322731	0.322465	0.32344	0.152228	0.190925	0.150709	0.131593	0.18117
ENSG00000134852.15	CLOCK	4:55529786:C:T	0.0607995	0.0605946	0.0682555	0.0306447	0.0521733	4:55529786:C:T-ENSG00000134852.15	0.133282	0.134036	0.132095	0.145672	0.137036	0.0849793	0.0964437	0.10511	0.104061	0.121513
ENSG00000172409.7	CLP1	11:57662008:G:T	0.486087	0.0314704	0.345961	0.262624	0.557543	11:57662008:G:T-ENSG00000172409.7	0.0408011	-0.366726	-0.11075	0.184101	0.020843	0.187944	0.144583	0.206427	0.202484	0.23579
ENSG00000125656.11	CLPP	19:6367722:A:ATT	0.00075475	0.000908241	0.00122722	0.000640125	0.00115062	19:6367722:A:ATT-ENSG00000125656.11	0.321772	0.321466	0.321619	0.322411	0.321847	0.162129	0.126452	0.193093	0.101577	0.19992
ENSG00000104853.16	CLPTM1	19:44935585:A:G	0.195378	0.0949453	0.0270338	0.0615385	0.064947	19:44935585:A:G-ENSG00000104853.16	0.138627	0.178201	0.216766	0.186675	0.188039	0.15869	0.159416	0.110773	0.135107	0.176369
ENSG00000139182.15	CLSTN3	12:7111103:A:G	7.39453e-08	9.56863e-07	6.65734e-06	2.20526e-06	1.34865e-06	12:7111103:A:G-ENSG00000139182.15	0.591133	0.59109	0.591107	0.59113	0.591136	0.167388	0.144283	0.207004	0.177323	0.169164
ENSG00000122705.18	CLTA	9:36214974:G:A	0.0462524	0.368301	0.541302	0.516325	0.493263	9:36214974:G:A-ENSG00000122705.18	0.101168	0.040674	0.0254918	0.0282298	0.0320211	0.0528916	0.0619402	0.0693121	0.0641407	0.0807267
ENSG00000070371.16	CLTCL1	22:19333529:T:C	0.0334274	0.029754	0.0285035	0.0272612	0.0257896	22:19333529:T:C-ENSG00000070371.16	-0.230635	-0.232452	-0.232685	-0.233163	-0.233173	0.153755	0.159423	0.144117	0.158739	0.168368
ENSG00000168405.18	CMAHP	6:25434614:C:T	0.0369662	0.825897	0.816278	0.852298	0.846049	6:25434614:C:T-ENSG00000168405.18	-0.323731	-0.00489141	0.0148021	0.00158309	0.00177913	0.142983	0.148887	0.181154	0.17746	0.130058
ENSG00000164237.9	CMBL	5:10281886:G:A	2.40778e-06	2.8776e-06	4.40433e-06	4.14655e-06	3.11913e-06	5:10281886:G:A-ENSG00000164237.9	0.526702	0.526727	0.526766	0.526804	0.526812	0.145576	0.160774	0.197276	0.201715	0.159398
ENSG00000187118.14	CMC1	3:28270738:A:G	0.0201797	0.0203671	0.0204887	0.0198054	0.019389	3:28270738:A:G-ENSG00000187118.14	-0.350354	-0.35048	-0.350761	-0.35099	-0.350894	0.203063	0.20345	0.214361	0.245514	0.235467
ENSG00000153815.18	CMIP	16:81455548:A:G	0.050316	0.0124369	0.056409	0.0514586	0.0449413	16:81455548:A:G-ENSG00000153815.18	0.123447	0.132166	0.122827	0.124553	0.125055	0.108786	0.0619449	0.0788324	0.0915197	0.0786026
ENSG00000162368.15	CMPK1	1:47355477:G:A	0.0641789	0.0713394	0.0681928	0.0856984	0.00352339	1:47355477:G:A-ENSG00000162368.15	-0.372274	-0.369785	-0.371775	-0.363876	-0.416742	0.205995	0.217674	0.251383	0.215269	0.168867
ENSG00000134326.12	CMPK2	2:6838001:T:C	3.04468e-05	5.69774e-05	2.62994e-05	2.42619e-05	9.96405e-05	2:6838001:T:C-ENSG00000134326.12	0.379588	0.379622	0.380283	0.380264	0.379857	0.116706	0.149649	0.152389	0.114005	0.148247
ENSG00000140931.20	CMTM3	16:66564507:G:A	0.00205488	0.00629012	0.0060829	0.00632242	0.00702389	16:66564507:G:A-ENSG00000140931.20	0.340833	0.339048	0.339768	0.339605	0.339331	0.126564	0.170597	0.164892	0.170031	0.221574
ENSG00000091317.8	CMTM6	3:32488366:G:GA	0.0549768	0.00519243	0.0474502	0.0333756	0.0355272	3:32488366:G:GA-ENSG00000091317.8	-0.130089	-0.144454	-0.131855	-0.137757	-0.135668	0.0970747	0.061177	0.0671913	0.0786774	0.0996548
ENSG00000180917.18	CMTR2	16:71244235:AG:A	0.0195197	0.0187611	0.0184415	0.0188081	0.011886	16:71244235:AG:A-ENSG00000180917.18	0.199621	0.200166	0.200835	0.200598	0.202603	0.119351	0.104802	0.126905	0.140624	0.121225
ENSG00000133313.15	CNDP2	18:74499889:C:G	0.000633234	0.230641	0.304917	0.226181	0.263937	18:74499889:C:G-ENSG00000133313.15	0.246694	0.100375	-0.0528325	-0.106365	-0.0870344	0.0721376	0.120054	0.102974	0.113015	0.131952
ENSG00000100528.12	CNIH1	14:54426281:T:C	0.00833513	0.00813023	0.00810287	0.00778063	0.00683597	14:54426281:T:C-ENSG00000100528.12	0.332784	0.333144	0.333386	0.333506	0.333777	0.17367	0.200788	0.214398	0.159265	0.16536
ENSG00000143771.12	CNIH4	1:224401123:T:A	0.0220054	0.00764548	0.0310675	0.0231722	0.0165962	1:224401123:T:A-ENSG00000143771.12	-0.209838	-0.21813	-0.208176	-0.211751	-0.216208	0.0986294	0.101378	0.124353	0.15565	0.15928
ENSG00000064666.15	CNN2	19:1038290:A:C	5.87117e-11	1.00258e-08	1.68976e-12	1.64648e-11	4.05129e-11	19:1038290:A:C-ENSG00000064666.15	-0.731657	-0.731658	-0.731664	-0.731665	-0.731665	0.157182	0.223599	0.139399	0.161772	0.159926
ENSG00000137161.18	CNPY3	6:42921412:CTTT:C	0.038129	0.0408016	0.0347948	0.0282479	0.034232	6:42921412:CTTT:C-ENSG00000137161.18	0.130498	0.129681	0.131343	0.13339	0.131236	0.120375	0.0857183	0.090523	0.0893275	0.0869407
ENSG00000162852.14	CNST	1:246564468:A:G	0.0124476	0.0147819	0.033104	0.0648405	0.185935	1:246564468:A:G-ENSG00000162852.14	0.541138	0.381435	-0.274683	-0.258233	-0.176365	0.251007	0.204109	0.201694	0.204858	0.19926
ENSG00000237990.3	CNTN4-AS1	3:3021325:G:C	0.0100999	0.0106092	0.0109752	0.00907403	0.00277827	3:3021325:G:C-ENSG00000237990.3	0.292918	0.293057	0.292949	0.294623	0.297091	0.13827	0.169629	0.148736	0.15152	0.128843
ENSG00000108797.12	CNTNAP1	17:42633605:G:A	0.0117992	0.0102905	0.0136402	0.0122014	0.011949	17:42633605:G:A-ENSG00000108797.12	-0.420899	-0.421597	-0.420638	-0.421283	-0.421146	0.256184	0.194207	0.30744	0.241811	0.244504
ENSG00000170037.14	CNTROB	17:7937361:G:A	0.00648023	0.00435784	0.00541859	0.00670636	0.00336594	17:7937361:G:A-ENSG00000170037.14	-0.259086	-0.26055	-0.260119	-0.259426	-0.261516	0.180247	0.111674	0.115505	0.131973	0.134049
ENSG00000106603.20	COA1	7:43680269:T:C	0.00438339	0.00419492	0.00465929	0.00449347	0.00415497	7:43680269:T:C-ENSG00000106603.20	0.54758	0.547719	0.547646	0.547711	0.54779	0.323702	0.274912	0.321373	0.244687	0.272637
ENSG00000168275.16	COA6	1:234373513:G:C	2.50696e-08	3.49193e-06	4.54621e-05	4.63305e-06	2.23578e-05	1:234373513:G:C-ENSG00000168275.16	0.481105	0.481069	0.481008	0.481174	0.481135	0.0948029	0.141451	0.160396	0.148891	0.213609
ENSG00000231663.3	COA6-AS1	1:234373210:A:C	0.000176602	0.000187664	0.000187815	0.00018794	0.000181063	1:234373210:A:C-ENSG00000231663.3	0.855021	0.85502	0.855033	0.855033	0.855034	0.339304	0.364566	0.377479	0.401637	0.361087
ENSG00000068120.15	COASY	17:42597191:C:CT	0.0318058	0.85614	0.864199	0.865464	0.86683	17:42597191:C:CT-ENSG00000068120.15	-0.186997	-0.00258198	0.00253149	-0.00374941	-0.00402441	0.0686864	0.0784742	0.0677965	0.0768022	0.0850735
ENSG00000100473.18	COCH	14:30911296:C:CT	0.0262656	0.0253724	0.0236988	0.0237668	0.0227253	14:30911296:C:CT-ENSG00000100473.18	-0.394154	-0.394649	-0.395368	-0.395163	-0.395218	0.287297	0.218559	0.25627	0.287978	0.257663
ENSG00000103051.21	COG4	16:70566259:A:G	0.000410421	0.000404896	0.000598653	0.000216007	0.00072586	16:70566259:A:G-ENSG00000103051.21	0.31094	0.310925	0.310758	0.312329	0.311047	0.139971	0.111656	0.115433	0.112095	0.149018
ENSG00000133103.17	COG6	13:39688134:G:A	0.0337673	0.0168979	0.0223423	0.0243934	0.0232605	13:39688134:G:A-ENSG00000133103.17	-0.316662	-0.325329	-0.322757	-0.321188	-0.320932	0.210731	0.176361	0.182465	0.218658	0.204933
ENSG00000213380.16	COG8	16:69325817:G:A	0.00263752	0.0140894	0.0110312	0.00860849	0.00870284	16:69325817:G:A-ENSG00000213380.16	-0.413532	-0.405604	-0.407048	-0.40869	-0.40902	0.19372	0.225923	0.184718	0.178868	0.213193
ENSG00000080573.7	COL5A3	19:10002646:C:T	2.59604e-06	6.16213e-06	2.28674e-06	2.38308e-06	2.0811e-06	19:10002646:C:T-ENSG00000080573.7	0.456986	0.456916	0.457254	0.457297	0.457296	0.143434	0.135034	0.142583	0.148487	0.142585
ENSG00000142173.17	COL6A2	21:46081620:G:T	0.00446181	0.00475252	0.00479497	0.00443021	0.00102376	21:46081620:G:T-ENSG00000142173.17	-0.288735	-0.288699	-0.289121	-0.289644	-0.291747	0.119008	0.12924	0.146435	0.132005	0.127926
ENSG00000049089.15	COL9A2	1:40337450:G:A	0.0356581	0.0401903	0.0293943	0.0287217	0.0187334	1:40337450:G:A-ENSG00000049089.15	-0.398183	-0.396537	-0.401007	-0.400934	-0.405194	0.306725	0.274918	0.333575	0.254884	0.205558
ENSG00000092758.18	COL9A3	20:62812335:G:A	4.56468e-06	5.62749e-06	5.42898e-06	5.9032e-06	5.32923e-06	20:62812335:G:A-ENSG00000092758.18	0.672791	0.672794	0.672817	0.672822	0.672825	0.19254	0.238379	0.216047	0.257327	0.251755
ENSG00000130309.12	COLGALT1	19:17558522:G:A	0.0151256	0.0160169	0.00984647	0.0142804	0.0135346	19:17558522:G:A-ENSG00000130309.12	0.167144	0.167539	0.17036	0.168266	0.16879	0.0864048	0.131036	0.0783078	0.106967	0.134641
ENSG00000114744.9	COMMD2	3:149739208:C:G	0.0894126	0.0973087	0.0884361	0.0821124	0.0420672	3:149739208:C:G-ENSG00000114744.9	0.19176	0.189996	0.191998	0.19391	0.204809	0.150978	0.167883	0.197944	0.150147	0.149857
ENSG00000170619.10	COMMD5	8:144874466:A:G	0.000828436	0.00100434	0.000891088	0.00132663	0.00155947	8:144874466:A:G-ENSG00000170619.10	0.388649	0.388557	0.389222	0.388699	0.388498	0.142647	0.160898	0.155827	0.222315	0.189495
ENSG00000093010.15	COMT	22:19959676:CTCT:C	0.144677	0.259606	0.0326518	0.210163	0.204165	22:19959676:CTCT:C-ENSG00000093010.15	-0.126885	-0.0956356	-0.165317	-0.109234	-0.111736	0.130039	0.154882	0.0800063	0.13698	0.166433
ENSG00000165644.11	COMTD1	10:75230888:G:A	0.0293957	0.0332109	0.032754	0.0269538	0.0352553	10:75230888:G:A-ENSG00000165644.11	0.251873	0.250896	0.251276	0.253187	0.250316	0.181599	0.240604	0.183928	0.125032	0.205164
ENSG00000143207.21	COP1	1:176196033:G:T	0.0498459	0.0538121	0.0123035	0.0470021	0.021743	1:176196033:G:T-ENSG00000143207.21	-0.166073	-0.165274	-0.17993	-0.166646	-0.174728	0.15199	0.127315	0.0821764	0.10984	0.0961853
ENSG00000122218.17	COPA	1:160309742:CT:C	0.0172238	0.00560576	0.0193713	0.0205012	0.0210281	1:160309742:CT:C-ENSG00000122218.17	0.162098	0.165714	0.162426	0.162146	0.161733	0.0959933	0.071968	0.0896692	0.101301	0.0993289
ENSG00000129083.13	COPB1	11:14505588:C:CT	0.000133477	0.00018219	0.000130923	0.000154365	0.000167657	11:14505588:C:CT-ENSG00000129083.13	0.26097	0.260762	0.261675	0.26119	0.261074	0.106615	0.120494	0.0929149	0.092174	0.0959738
ENSG00000184432.11	COPB2	3:139341880:C:T	0.0046138	0.847042	0.905196	0.871386	0.887138	3:139341880:C:T-ENSG00000184432.11	-0.287137	-0.0151547	-0.00487415	-0.0121513	-0.00819575	0.0904579	0.0923312	0.0937732	0.109659	0.106643
ENSG00000181789.14	COPG1	3:129267872:A:C	0.0222894	0.0185075	0.0269634	0.0196725	0.0258845	3:129267872:A:C-ENSG00000181789.14	-0.231709	-0.234247	-0.231391	-0.235369	-0.231759	0.113061	0.135156	0.182204	0.162622	0.225532
ENSG00000172301.11	COPRS	17:31876529:G:A	0.0216284	0.0193087	0.0239452	0.0236151	0.0238358	17:31876529:G:A-ENSG00000172301.11	0.180419	0.181433	0.18072	0.180777	0.18045	0.122558	0.114122	0.110663	0.112845	0.117868
ENSG00000141030.13	COPS3	17:17276167:G:A	1.03573e-07	2.22271e-08	9.86508e-08	2.73849e-07	5.03814e-10	17:17276167:G:A-ENSG00000141030.13	0.537932	0.53794	0.538001	0.538006	0.5381	0.176806	0.115819	0.147265	0.138446	0.11812
ENSG00000172428.11	COPS9	2:240135502:T:C	0.209167	0.350763	0.0297323	0.340064	0.258034	2:240135502:T:C-ENSG00000172428.11	0.169454	0.0988461	-0.363864	-0.0777706	0.155855	0.196686	0.216799	0.135121	0.191462	0.218154
ENSG00000115520.9	COQ10B	2:197497800:C:T	0.565015	0.546627	0.570893	0.541743	0.00235201	2:197497800:C:T-ENSG00000115520.9	0.0341129	-0.0423012	-0.0650404	-0.052136	0.293671	0.134015	0.0991054	0.131562	0.118477	0.0874382
ENSG00000167113.11	COQ4	9:128323345:G:T	0.0203575	0.0293386	0.0413602	0.037088	0.0410839	9:128323345:G:T-ENSG00000167113.11	-0.252302	-0.249282	-0.245398	-0.246869	-0.245311	0.165351	0.197572	0.161734	0.137987	0.158248
ENSG00000145244.12	CORIN	4:47843903:A:G	4.36104e-09	5.59646e-10	1.21713e-10	6.34482e-09	2.30971e-12	4:47843903:A:G-ENSG00000145244.12	0.651889	0.651895	0.651909	0.651915	0.651927	0.164529	0.136206	0.130104	0.179374	0.137613
ENSG00000110880.11	CORO1C	12:108704471:C:CA	0.0121916	0.01025	0.0141309	0.0138996	0.0139859	12:108704471:C:CA-ENSG00000110880.11	0.420955	0.421717	0.420817	0.420907	0.420656	0.263848	0.18096	0.278558	0.317606	0.249923
ENSG00000106789.13	CORO2A	9:98199646:C:T	0.0362808	0.0321075	0.0344406	0.0341308	0.0344944	9:98199646:C:T-ENSG00000106789.13	0.468169	0.469866	0.469363	0.469211	0.468617	0.369903	0.289127	0.324987	0.340447	0.401861
ENSG00000103187.8	COTL1	16:84594795:T:G	0.0227818	0.00494553	0.0219571	0.0249686	0.0173795	16:84594795:T:G-ENSG00000103187.8	0.120653	0.125821	0.121478	0.121232	0.12319	0.0806655	0.0513491	0.0601421	0.0840391	0.0761022
ENSG00000236088.12	COX10-DT	17:14024807:A:G	0.0117749	0.0100466	0.01081	0.0101724	0.00995975	17:14024807:A:G-ENSG00000236088.12	-0.220673	-0.222242	-0.222089	-0.222607	-0.22239	0.110106	0.129559	0.125021	0.12987	0.143117
ENSG00000178449.9	COX14	12:50116154:A:G	0.681838	0.0442012	0.680088	0.621093	0.653318	12:50116154:A:G-ENSG00000178449.9	-0.00637327	-0.418568	0.0115221	0.0371433	0.0329251	0.205523	0.178501	0.234263	0.223173	0.21513
ENSG00000138495.7	COX17	3:119665316:G:T	0.42452	0.425704	0.411213	0.41917	0.00693593	3:119665316:G:T-ENSG00000138495.7	0.0452275	-0.0521144	-0.0958742	-0.0614758	0.266585	0.140262	0.153664	0.12377	0.139392	0.0861586
ENSG00000203667.10	COX20	1:244816838:C:G	0.0301276	0.0279057	0.0322471	0.0327753	0.0307267	1:244816838:C:G-ENSG00000203667.10	0.347867	0.348692	0.34802	0.34771	0.34805	0.271075	0.207201	0.216346	0.25179	0.243651
ENSG00000126267.11	COX6B1	19:35655621:T:TA	0.0629968	0.0176825	0.066414	0.0683455	0.0702105	19:35655621:T:TA-ENSG00000126267.11	-0.112624	-0.123049	-0.112578	-0.112752	-0.111991	0.101355	0.0674512	0.0603802	0.0845404	0.0964741
ENSG00000163751.4	CPA3	3:148891258:T:C	0.00360441	0.00359002	0.00420876	0.00434441	0.00414473	3:148891258:T:C-ENSG00000163751.4	0.572042	0.572117	0.572019	0.571938	0.571986	0.256288	0.28373	0.289227	0.315452	0.337747
ENSG00000158525.16	CPA5	7:130363820:A:G	0.012558	0.0124123	0.0132416	0.0136051	0.0125296	7:130363820:A:G-ENSG00000158525.16	0.376564	0.376737	0.376907	0.376689	0.376916	0.217172	0.18941	0.228823	0.281181	0.204164
ENSG00000108582.12	CPD	17:30393723:A:C	0.0335448	0.0209939	0.0300345	0.0301901	0.0283944	17:30393723:A:C-ENSG00000108582.12	0.150757	0.154808	0.152922	0.152309	0.152796	0.117811	0.0926183	0.110088	0.0827698	0.11465
ENSG00000113742.14	CPEB4	5:173869893:C:T	0.0227978	0.0178983	0.012418	0.00188833	0.0135795	5:173869893:C:T-ENSG00000113742.14	0.163898	0.166101	0.168147	0.175156	0.16564	0.123651	0.123782	0.0915985	0.076955	0.0620273
ENSG00000214078.13	CPNE1	20:35627312:C:CA	0	0	0	0	0	20:35627312:C:CA-ENSG00000214078.13	-1.22374	-1.22374	-1.22374	-1.22374	-1.22374	0.119516	0.0993566	0.148438	0.086111	0.103566
ENSG00000140848.17	CPNE2	16:57141079:G:A	3.9241e-07	6.19638e-07	1.49027e-07	2.47326e-07	5.98703e-07	16:57141079:G:A-ENSG00000140848.17	0.625389	0.625386	0.62544	0.62544	0.625433	0.232587	0.165009	0.156043	0.188314	0.206106
ENSG00000178773.15	CPNE7	16:89596582:T:C	0.0591379	0.0615633	0.0467955	0.0534166	0.0598597	16:89596582:T:C-ENSG00000178773.15	-0.293263	-0.292646	-0.299568	-0.295318	-0.292458	0.246742	0.236174	0.200381	0.246698	0.231959
ENSG00000103381.12	CPPED1	16:12803387:A:G	0.0152724	0.0138353	0.0122438	0.0084072	0.0129488	16:12803387:A:G-ENSG00000103381.12	0.311278	0.312064	0.312626	0.31496	0.312267	0.283296	0.189589	0.158439	0.144257	0.174709
ENSG00000104324.16	CPQ	8:96651532:T:A	0.0451123	0.0561495	0.0145562	0.0101979	0.0288402	8:96651532:T:A-ENSG00000104324.16	-0.147001	-0.144573	-0.155965	-0.158776	-0.150057	0.154888	0.1061	0.0802116	0.0814445	0.0882521
ENSG00000071894.17	CPSF1	8:144396341:G:A	8.39806e-35	4.09367e-28	1.72859e-46	1.67949e-68	3.2448e-39	8:144396341:G:A-ENSG00000071894.17	0.816142	0.816142	0.816143	0.816143	0.816143	0.0766427	0.0916139	0.0598175	0.0508372	0.06945
ENSG00000165934.13	CPSF2	14:92119720:T:C	0.0233083	0.00030131	0.000176084	0.00219046	0.00571476	14:92119720:T:C-ENSG00000165934.13	-0.358865	-0.376143	-0.376971	-0.370107	-0.366562	0.142271	0.143168	0.115234	0.178351	0.165138
ENSG00000157184.7	CPT2	1:53210776:G:A	0.0155469	0.0127074	0.00858035	0.0126183	0.0158602	1:53210776:G:A-ENSG00000157184.7	-0.274335	-0.275594	-0.278793	-0.276302	-0.274642	0.165924	0.13505	0.131586	0.191954	0.178603
ENSG00000224051.7	CPTP	1:1363880:A:G	0.0217286	0.0164171	0.0128149	0.00564611	0.0154736	1:1363880:A:G-ENSG00000224051.7	-0.147172	-0.149369	-0.150844	-0.153949	-0.149609	0.0889872	0.0856333	0.0940596	0.0675639	0.0906854
ENSG00000106066.15	CPVL	7:29154813:C:T	0.00107428	0.000168003	0.000470769	0.000518975	0.00125484	7:29154813:C:T-ENSG00000106066.15	0.36276	0.364442	0.364364	0.364357	0.363391	0.130498	0.115562	0.153667	0.183386	0.161823
ENSG00000203710.12	CR1	1:207491376:G:A	0.000156874	0.00010025	0.000167562	3.49734e-05	5.35899e-05	1:207491376:G:A-ENSG00000203710.12	0.294879	0.295326	0.295357	0.29698	0.296323	0.115947	0.11015	0.113976	0.0943886	0.0961926
ENSG00000196872.12	CRACDL	2:98887860:G:A	0.00724831	0.0081955	0.00724639	0.0029986	0.00757308	2:98887860:G:A-ENSG00000196872.12	0.397339	0.396912	0.39745	0.400582	0.397415	0.224417	0.213411	0.182771	0.161156	0.215564
ENSG00000177685.17	CRACR2B	11:780410:T:G	2.94628e-07	5.1084e-07	4.85354e-08	6.0804e-08	5.11407e-09	11:780410:T:G-ENSG00000177685.17	-0.516119	-0.516106	-0.516266	-0.516289	-0.516376	0.161037	0.128933	0.135542	0.131131	0.1258
ENSG00000095321.18	CRAT	9:129098996:A:C	0.00434754	0.00534584	0.00336622	0.00532629	0.00637385	9:129098996:A:C-ENSG00000095321.18	0.202768	0.202117	0.204439	0.202603	0.202097	0.105556	0.105939	0.0895911	0.0994012	0.108247
ENSG00000241258.7	CRCP	7:66152608:T:C	2.63822e-05	1.08486e-06	8.50026e-07	4.42414e-05	1.87695e-06	7:66152608:T:C-ENSG00000241258.7	-0.517644	-0.517809	-0.517951	-0.517744	-0.517923	0.177573	0.141773	0.144806	0.152876	0.173365
ENSG00000118260.15	CREB1	2:207533213:A:AT	0.0116637	0.0122969	0.0101749	0.0102411	0.010846	2:207533213:A:AT-ENSG00000118260.15	0.279935	0.279887	0.281029	0.280869	0.280575	0.181921	0.196365	0.133708	0.135951	0.181964
ENSG00000111269.3	CREBL2	12:12651465:G:A	0.061404	0.0598876	0.0499165	0.0318789	0.0504141	12:12651465:G:A-ENSG00000111269.3	-0.173951	-0.1749	-0.176966	-0.183868	-0.176762	0.131868	0.13066	0.126684	0.119361	0.163151
ENSG00000137504.15	CREBZF	11:85682612:CA:C	0.653703	0.0406877	0.774574	0.743484	0.654992	11:85682612:CA:C-ENSG00000137504.15	-0.0299723	-0.246662	0.000198231	-0.0107672	-0.0292795	0.121462	0.109762	0.159499	0.155074	0.139283
ENSG00000184164.15	CRELD2	22:49886488:T:C	0.000153652	0.000147163	0.000113672	3.81797e-05	8.40632e-05	22:49886488:T:C-ENSG00000184164.15	-0.379433	-0.37955	-0.379691	-0.380451	-0.380292	0.173746	0.163268	0.120589	0.103025	0.202497
ENSG00000145708.11	CRHBP	5:76911950:A:T	0.0633923	0.0285306	0.218491	0.0462229	0.186078	5:76911950:A:T-ENSG00000145708.11	0.302459	0.357184	0.221243	0.332625	0.239382	0.266984	0.203359	0.25807	0.236285	0.223375
ENSG00000150938.10	CRIM1	2:36404636:A:G	0.000504784	0.00121578	0.00159093	0.00151759	0.00183102	2:36404636:A:G-ENSG00000150938.10	0.490934	0.490533	0.490452	0.490549	0.490365	0.164781	0.203041	0.229426	0.228228	0.263171
ENSG00000182809.11	CRIP2	14:105502724:C:T	1.03089e-05	1.45195e-05	8.64692e-06	9.13228e-06	9.28107e-06	14:105502724:C:T-ENSG00000182809.11	-0.50163	-0.501654	-0.501844	-0.501884	-0.501866	0.151657	0.181014	0.147955	0.185725	0.185492
ENSG00000119878.6	CRIPT	2:46631182:G:C	0.00734886	0.00814749	0.00594851	0.00691709	0.00699586	2:46631182:G:C-ENSG00000119878.6	0.241531	0.2411	0.243035	0.241887	0.242003	0.167015	0.139054	0.122556	0.106334	0.132667
ENSG00000103196.12	CRISPLD2	16:84777002:G:A	0.00104763	0.00111376	0.00164069	0.00140706	0.00118579	16:84777002:G:A-ENSG00000103196.12	-0.271395	-0.271571	-0.270992	-0.271597	-0.271712	0.120566	0.129298	0.12152	0.128296	0.103668
ENSG00000058453.17	CROCC	1:16711457:G:C	0.0141108	0.0122841	0.0137393	0.012999	0.0121407	1:16711457:G:C-ENSG00000058453.17	-0.26397	-0.264918	-0.264654	-0.264922	-0.265009	0.211195	0.147655	0.173443	0.133483	0.140012
ENSG00000170275.15	CRTAP	3:33083784:A:AT	0.0129993	0.0139511	0.0136468	0.0113664	0.00622966	3:33083784:A:AT-ENSG00000170275.15	-0.295965	-0.295782	-0.29609	-0.297629	-0.298652	0.166245	0.178783	0.233164	0.201587	0.118903
ENSG00000160741.17	CRTC2	1:153976229:C:T	0.0434428	0.0407335	0.0408662	0.0396738	0.00848033	1:153976229:C:T-ENSG00000160741.17	0.136885	0.137697	0.137748	0.138272	0.14549	0.122303	0.072733	0.084266	0.0778641	0.0787722
ENSG00000008405.12	CRY1	12:107086766:C:G	0.0243303	0.047257	0.0294583	0.0538471	0.00941918	12:107086766:C:G-ENSG00000008405.12	0.222751	0.211374	0.218881	0.209847	0.227231	0.139112	0.146912	0.132333	0.134669	0.1017
ENSG00000121671.12	CRY2	11:45890462:A:G	9.43288e-05	5.14915e-06	0.000154516	5.99431e-05	4.97885e-09	11:45890462:A:G-ENSG00000121671.12	-0.443488	-0.443987	-0.443481	-0.443626	-0.444885	0.163324	0.10677	0.126302	0.111026	0.098228
ENSG00000291087.1	CRYBB2P1	22:25450120:G:T	0.00354296	0.00348097	0.00334286	0.00349518	0.00300846	22:25450120:G:T-ENSG00000291087.1	-0.549677	-0.549768	-0.549958	-0.549832	-0.549999	0.291467	0.279382	0.296496	0.286988	0.236394
ENSG00000127377.10	CRYGN	7:151418605:C:T	0.00049723	0.000758774	0.000292657	0.000127362	0.000258361	7:151418605:C:T-ENSG00000127377.10	0.525452	0.525364	0.525826	0.526264	0.525943	0.205411	0.23183	0.211977	0.172389	0.209658
ENSG00000165475.15	CRYL1	13:20485908:T:C	0.0106381	0.00928988	0.008942	0.00768307	0.0128944	13:20485908:T:C-ENSG00000165475.15	-0.284939	-0.286303	-0.287167	-0.288263	-0.284634	0.13591	0.167509	0.168909	0.157427	0.159424
ENSG00000116791.14	CRYZ	1:74782438:G:A	7.3957e-08	2.37588e-14	4.11758e-10	3.28069e-11	5.11813e-10	1:74782438:G:A-ENSG00000116791.14	-0.515212	-0.515412	-0.515383	-0.51546	-0.515475	0.106457	0.0908237	0.10098	0.102831	0.130039
ENSG00000124207.17	CSE1L	20:49011068:C:T	0.00850321	0.579048	0.504393	0.568873	0.290884	20:49011068:C:T-ENSG00000124207.17	-0.637048	0.00666396	0.0379746	0.0154968	-0.187706	0.21299	0.227892	0.216458	0.29928	0.256749
ENSG00000184371.14	CSF1	1:109920112:G:C	0.0380293	0.0312204	0.0412998	0.0392973	0.0432698	1:109920112:G:C-ENSG00000184371.14	-0.208829	-0.211182	-0.208953	-0.209639	-0.207887	0.166798	0.140538	0.13728	0.145891	0.152563
ENSG00000100368.15	CSF2RB	22:36958869:T:C	0.0413071	0.118527	0.00383151	0.114749	0.147624	22:36958869:T:C-ENSG00000100368.15	0.220313	0.18452	0.255817	0.186426	0.176776	0.10605	0.138394	0.096613	0.148526	0.139143
ENSG00000232254.1	CSF2RBP1	22:36907037:C:CAAA	0.0688786	0.0654258	0.0692504	0.0646619	0.0255664	22:36907037:C:CAAA-ENSG00000232254.1	-0.151783	-0.153378	-0.151908	-0.153223	-0.162084	0.119955	0.130016	0.110589	0.097872	0.105644
ENSG00000147408.16	CSGALNACT1	8:19756013:C:A	0.00902088	0.0118073	0.0123137	0.0114786	0.0104976	8:19756013:C:A-ENSG00000147408.16	0.326652	0.32542	0.32556	0.326164	0.326419	0.207309	0.176785	0.162282	0.18963	0.169428
ENSG00000141551.15	CSNK1D	17:82244354:AAGAC:A	0.0126687	0.00447671	0.0092499	0.0157163	0.00667578	17:82244354:AAGAC:A-ENSG00000141551.15	-0.392124	-0.398508	-0.394219	-0.391293	-0.395635	0.267278	0.190883	0.182933	0.22503	0.174109
ENSG00000133275.16	CSNK1G2	19:1957518:C:A	0.465047	0.425665	0.459735	0.474402	0.00619906	19:1957518:C:A-ENSG00000133275.16	0.0427059	-0.0680858	-0.0815778	-0.0497684	0.278388	0.133668	0.128931	0.12267	0.122996	0.08973
ENSG00000144655.15	CSRNP1	3:39157893:AT:A	0.0155592	0.0129528	0.00734101	0.0132723	0.0096527	3:39157893:AT:A-ENSG00000144655.15	0.235591	0.237156	0.241794	0.237275	0.239148	0.124426	0.13	0.129112	0.146229	0.125281
ENSG00000110925.7	CSRNP2	12:51060901:C:CA	0.0329901	0.0284235	0.0227243	0.00259975	0.0237099	12:51060901:C:CA-ENSG00000110925.7	0.301685	0.303664	0.305976	0.319448	0.305704	0.20696	0.182709	0.14654	0.120672	0.159336
ENSG00000101439.9	CST3	20:23641629:G:C	0.000464016	0.00046246	0.000328853	0.000457079	0.000439942	20:23641629:G:C-ENSG00000101439.9	-0.235204	-0.235434	-0.236641	-0.236322	-0.236501	0.0924285	0.0926776	0.0781481	0.125831	0.154358
ENSG00000077984.6	CST7	20:24976819:C:T	0.00195188	0.00310017	0.00444502	0.00411508	0.0041182	20:24976819:C:T-ENSG00000077984.6	-0.456761	-0.456334	-0.455907	-0.456108	-0.456103	0.166362	0.223352	0.249651	0.228375	0.262042
ENSG00000121552.4	CSTA	3:122354032:A:G	0.0178336	0.0240588	0.0273332	0.0273428	0.0227578	3:122354032:A:G-ENSG00000121552.4	0.301292	0.298846	0.298584	0.298659	0.300352	0.183021	0.154042	0.183193	0.233679	0.206984
ENSG00000160213.9	CSTB	21:43805815:GT:G	2.06102e-12	6.8765e-08	2.17424e-11	8.58912e-08	2.64426e-08	21:43805815:GT:G-ENSG00000160213.9	-0.533194	-0.533171	-0.533287	-0.533224	-0.533251	0.090985	0.134217	0.116513	0.120616	0.132368
ENSG00000159692.17	CTBP1	4:1247771:G:GGGA	0.0636316	0.0531188	0.0377918	0.0559766	0.0525789	4:1247771:G:GGGA-ENSG00000159692.17	0.141797	0.14464	0.14963	0.143826	0.144507	0.13237	0.099333	0.0914835	0.121021	0.12802
ENSG00000196810.5	CTBP1-DT	4:1247684:G:A	0.00280717	0.00226874	0.00260901	0.00208582	0.00222868	4:1247684:G:A-ENSG00000196810.5	0.289004	0.289957	0.289715	0.290987	0.290283	0.131439	0.12651	0.13032	0.159387	0.139014
ENSG00000117151.13	CTBS	1:84574145:G:A	0.0458714	0.0525732	0.0487787	0.0415954	0.0490017	1:84574145:G:A-ENSG00000117151.13	0.147245	0.14559	0.146756	0.148966	0.146789	0.123878	0.107974	0.0985212	0.107581	0.130708
ENSG00000178971.17	CTC1	17:8227549:A:C	1.9762e-13	1.9015e-11	1.84536e-10	1.31453e-05	2.99383e-10	17:8227549:A:C-ENSG00000178971.17	-0.531544	-0.53157	-0.531579	-0.531219	-0.531523	0.0935746	0.111371	0.113562	0.0953689	0.0980735
ENSG00000233937.9	CTC-338M12.4	5:181256371:AT:A	0.223812	0.113404	0.0217759	0.359169	0.315481	5:181256371:AT:A-ENSG00000233937.9	0.220502	0.293121	0.420943	0.151925	0.177081	0.312721	0.301614	0.181548	0.290155	0.264632
ENSG00000175826.12	CTDNEP1	17:7251819:GA:G	0.000537876	3.21923e-05	7.16924e-06	4.99783e-06	4.19647e-07	17:7251819:GA:G-ENSG00000175826.12	0.443569	0.443974	0.444265	0.444509	0.444923	0.224508	0.134303	0.114632	0.121451	0.128992
ENSG00000060069.18	CTDP1	18:79729462:T:C	0.74588	0.0079047	0.835902	0.832162	0.783468	18:79729462:T:C-ENSG00000060069.18	-0.0288399	-0.281176	-0.00917148	-0.00947327	-0.0197274	0.0877482	0.0923771	0.0925601	0.104661	0.110602
ENSG00000178585.15	CTNNBIP1	1:9940342:T:A	0.209281	0.209254	0.195921	0.207086	0.0323386	1:9940342:T:A-ENSG00000178585.15	-0.18339	-0.185053	-0.188565	-0.184332	-0.245383	0.162613	0.243386	0.231861	0.227913	0.136994
ENSG00000164733.22	CTSB	8:11862718:G:C	0.00474097	0.00293127	0.00419463	0.00498937	0.00404018	8:11862718:G:C-ENSG00000164733.22	-0.167664	-0.170008	-0.169829	-0.1694	-0.170058	0.0705978	0.0729778	0.0825553	0.129587	0.120075
ENSG00000109861.17	CTSC	11:88334596:T:C	0.00134847	0.00124703	0.00140248	0.00139912	0.00125458	11:88334596:T:C-ENSG00000109861.17	-0.395789	-0.396006	-0.396047	-0.396127	-0.396178	0.200782	0.174803	0.163259	0.190457	0.158128
ENSG00000174080.12	CTSF	11:66573534:C:G	0.00143204	0.000131331	5.69349e-05	9.88288e-07	5.13596e-05	11:66573534:C:G-ENSG00000174080.12	0.417384	0.419015	0.420701	0.423906	0.421697	0.118561	0.111585	0.139279	0.130239	0.169824
ENSG00000103811.18	CTSH	15:78944951:C:T	2.14118e-12	3.65485e-13	1.11022e-15	1.9873e-12	7.94143e-12	15:78944951:C:T-ENSG00000103811.18	-0.879167	-0.879167	-0.879167	-0.879167	-0.879167	0.187237	0.166811	0.162137	0.153641	0.211212
ENSG00000143387.14	CTSK	1:150765721:C:T	2.34143e-08	9.20745e-09	8.62317e-10	8.09536e-09	2.02793e-08	1:150765721:C:T-ENSG00000143387.14	-0.643973	-0.64398	-0.64401	-0.644009	-0.644004	0.173081	0.153171	0.149998	0.183957	0.16128
ENSG00000135047.16	CTSL	9:87735590:T:C	0.0341688	0.0388671	0.0438574	0.0427131	0.0430063	9:87735590:T:C-ENSG00000135047.16	-0.277831	-0.276675	-0.276387	-0.276492	-0.276198	0.180382	0.206357	0.272999	0.181696	0.194561
ENSG00000163131.12	CTSS	1:150809646:A:C	0.0179493	0.0192277	0.0198802	0.0109087	0.0182724	1:150809646:A:C-ENSG00000163131.12	0.153113	0.152762	0.152863	0.157306	0.153086	0.0935572	0.0940113	0.10288	0.0992063	0.0764875
ENSG00000172543.9	CTSW	11:65874460:T:A	0.0054462	0.00897381	0.00891995	0.00882956	0.00872732	11:65874460:T:A-ENSG00000172543.9	0.394481	0.393029	0.393436	0.393457	0.393504	0.199077	0.240414	0.208836	0.187816	0.196328
ENSG00000101160.15	CTSZ	20:58988006:C:T	0.213043	0.277541	0.204397	0.223421	0.00128845	20:58988006:C:T-ENSG00000101160.15	0.147836	0.127941	0.155592	0.144588	0.256396	0.0971947	0.096213	0.0912735	0.105667	0.0966219
ENSG00000142544.7	CTU1	19:51084696:C:T	0.0196168	0.0142127	0.0201421	0.0213381	0.0193848	19:51084696:C:T-ENSG00000142544.7	-0.394399	-0.397064	-0.39494	-0.394343	-0.394855	0.232393	0.224324	0.218856	0.242893	0.266585
ENSG00000259235.2	CTXN2-AS1	15:48184913:A:G	2.74989e-09	1.06872e-08	1.19458e-08	2.09294e-07	4.21953e-10	15:48184913:A:G-ENSG00000259235.2	0.555056	0.555059	0.555104	0.555108	0.55516	0.132986	0.131931	0.137222	0.158056	0.126164
ENSG00000107611.16	CUBN	10:17138648:AT:A	3.03544e-05	2.68203e-05	2.99945e-05	2.48216e-05	2.41832e-05	10:17138648:AT:A-ENSG00000107611.16	0.491511	0.491588	0.491648	0.491766	0.491735	0.198554	0.169405	0.176059	0.156832	0.16396
ENSG00000180891.13	CUEDC1	17:57946706:C:T	0.000640587	0.00868696	0.0069632	0.0038407	0.00479928	17:57946706:C:T-ENSG00000180891.13	0.259269	0.254218	0.255096	0.257286	0.256601	0.107715	0.152844	0.130435	0.0862495	0.119587
ENSG00000107874.11	CUEDC2	10:102412988:G:A	0.109354	0.0185913	0.110278	0.101513	0.0975995	10:102412988:G:A-ENSG00000107874.11	-0.16737	-0.195624	-0.168218	-0.171455	-0.171385	0.136844	0.102725	0.109319	0.129074	0.182185
ENSG00000036257.14	CUL3	2:224561810:C:T	0.02658	0.0339524	0.0246178	0.0329868	0.0241452	2:224561810:C:T-ENSG00000036257.14	0.177717	0.175589	0.179333	0.175971	0.17855	0.128354	0.153054	0.103523	0.119755	0.103983
ENSG00000139842.15	CUL4A	13:113232718:A:G	0.0556738	0.0564636	0.0465512	0.0418013	0.0362575	13:113232718:A:G-ENSG00000139842.15	0.313077	0.313341	0.315591	0.317993	0.319054	0.288757	0.266036	0.2041	0.222332	0.219449
ENSG00000166266.14	CUL5	11:107972420:C:CTTTTTTTTT	0.713568	0.751363	0.625689	0.741165	0.012459	11:107972420:C:CTTTTTTTTT-ENSG00000166266.14	-0.0244077	-0.0144131	-0.0496404	-0.0174111	-0.266695	0.175098	0.161531	0.113274	0.140227	0.101423
ENSG00000044090.13	CUL7	6:43054205:C:T	0.00162783	0.00139673	0.000377278	0.000710292	0.00107853	6:43054205:C:T-ENSG00000044090.13	-0.581529	-0.581668	-0.582881	-0.582294	-0.581924	0.312367	0.267787	0.192584	0.244452	0.265263
ENSG00000226752.10	CUTALP	9:120820419:G:T	1.11022e-16	1.11022e-16	1.11022e-16	1.11022e-16	1.11022e-16	9:120820419:G:T-ENSG00000226752.10	-1.09777	-1.09777	-1.09777	-1.09777	-1.09777	0.0862437	0.0904541	0.100184	0.100081	0.0941331
ENSG00000257923.12	CUX1	7:101824453:A:G	0.0710569	0.0474425	0.0768181	0.0786063	0.0754841	7:101824453:A:G-ENSG00000257923.12	-0.196555	-0.202643	-0.196905	-0.196249	-0.196235	0.185128	0.116632	0.166053	0.208527	0.246632
ENSG00000095485.18	CWF19L1	10:100233804:CAG:C	0.000755655	0.00195456	0.00172095	0.00143347	0.00225573	10:100233804:CAG:C-ENSG00000095485.18	0.425087	0.423966	0.424404	0.424818	0.424142	0.183301	0.175721	0.201399	0.156774	0.211225
ENSG00000163739.5	CXCL1	4:73838282:C:T	0.214418	0.207201	0.0011439	0.243193	0.277308	4:73838282:C:T-ENSG00000163739.5	0.217161	0.216954	0.356698	0.204155	0.193062	0.178129	0.141798	0.109996	0.154072	0.17629
ENSG00000163735.7	CXCL5	4:73996373:C:G	2.42503e-05	3.49797e-05	1.72871e-05	1.2911e-05	9.6788e-06	4:73996373:C:G-ENSG00000163735.7	-0.637702	-0.637698	-0.637757	-0.6378	-0.63781	0.274927	0.233741	0.214736	0.19382	0.208398
ENSG00000163464.8	CXCR1	2:218155759:A:G	0.0176431	0.0109799	0.0152246	0.0147121	0.0168286	2:218155759:A:G-ENSG00000163464.8	-0.141008	-0.144089	-0.142886	-0.143072	-0.141957	0.089178	0.0863609	0.0774083	0.0767494	0.087573
ENSG00000172215.6	CXCR6	3:45979726:G:T	0.0442139	0.0647426	0.0691797	0.0704053	0.0691074	3:45979726:G:T-ENSG00000172215.6	0.154698	0.149678	0.15035	0.149766	0.149917	0.120531	0.117562	0.123029	0.130042	0.111448
ENSG00000154832.16	CXXC1	18:50286217:C:T	0.0188589	0.0156364	0.0181926	0.0185786	0.0156051	18:50286217:C:T-ENSG00000154832.16	-0.214202	-0.215553	-0.215055	-0.214812	-0.215603	0.192415	0.124116	0.122273	0.128786	0.120355
ENSG00000008283.16	CYB561	17:63425098:TTTGTATCTG:T	7.86959e-05	8.31257e-05	5.49348e-05	6.96074e-05	7.66411e-05	17:63425098:TTTGTATCTG:T-ENSG00000008283.16	-0.370446	-0.370571	-0.371146	-0.371033	-0.370974	0.133929	0.145877	0.113258	0.138526	0.151364
ENSG00000162144.10	CYB561A3	11:61396957:T:C	0.0248001	0.0267685	0.024697	0.0239635	0.0189306	11:61396957:T:C-ENSG00000162144.10	-0.406506	-0.405917	-0.406679	-0.406871	-0.408541	0.302194	0.249042	0.261188	0.234561	0.257441
ENSG00000166347.19	CYB5A	18:74280673:G:A	0.0300115	0.0274692	0.0321455	0.0318997	0.0324515	18:74280673:G:A-ENSG00000166347.19	0.364745	0.365702	0.364977	0.364865	0.364341	0.251964	0.206961	0.275538	0.256542	0.261728
ENSG00000166394.15	CYB5R2	11:7651054:C:T	0.0192278	0.0182623	0.0121744	0.0129981	0.0135882	11:7651054:C:T-ENSG00000166394.15	0.397587	0.398249	0.401483	0.400523	0.399815	0.242088	0.253552	0.203366	0.225745	0.243951
ENSG00000065615.14	CYB5R4	6:83893507:T:C	0.00672486	0.0103783	0.00154246	0.000560426	0.00277384	6:83893507:T:C-ENSG00000065615.14	-0.260973	-0.259901	-0.264947	-0.266131	-0.26384	0.141619	0.156838	0.117102	0.0808524	0.149717
ENSG00000051523.12	CYBA	16:88667860:A:G	0.765371	0.799736	0.831835	0.00403151	0.8198	16:88667860:A:G-ENSG00000051523.12	-0.00846142	0.00472389	-0.000876922	-0.170869	0.00226729	0.0545958	0.0634081	0.0465241	0.0476407	0.0666695
ENSG00000178927.19	CYBC1	17:82450543:A:C	5.72208e-05	0.000713577	5.24616e-05	6.44489e-05	0.000118041	17:82450543:A:C-ENSG00000178927.19	-0.273807	-0.273387	-0.275094	-0.275277	-0.274703	0.0780296	0.163579	0.0903617	0.121825	0.112905
ENSG00000273749.5	CYFIP1	15:22947444:C:T	0.00101148	0.00476362	0.00463681	0.00482482	0.00411719	15:22947444:C:T-ENSG00000273749.5	-0.546875	-0.544346	-0.544605	-0.544561	-0.544959	0.201652	0.23533	0.282123	0.352536	0.25474
ENSG00000055163.21	CYFIP2	5:157245224:TAAAA:T	0.00155895	0.00186998	0.00155806	0.00174138	0.00142803	5:157245224:TAAAA:T-ENSG00000055163.21	-0.431844	-0.431622	-0.432239	-0.432024	-0.432259	0.189574	0.173939	0.197925	0.22752	0.195945
ENSG00000161544.10	CYGB	17:76552033:C:T	0.000142503	0.000925148	0.00093966	0.00055666	0.00028998	17:76552033:C:T-ENSG00000161544.10	-0.448925	-0.448154	-0.448275	-0.448559	-0.449156	0.136828	0.220746	0.19989	0.1696	0.169038
ENSG00000261644.3	CYLD-AS1	16:50709027:G:A	0.000364351	6.43189e-05	0.00103819	0.000379191	0.00035722	16:50709027:G:A-ENSG00000261644.3	0.48279	0.483403	0.482413	0.482994	0.482997	0.206218	0.145996	0.171716	0.201413	0.192856
ENSG00000135929.9	CYP27A1	2:218738096:G:A	7.66327e-12	1.36834e-10	3.57784e-10	1.39702e-10	7.14075e-11	2:218738096:G:A-ENSG00000135929.9	0.66503	0.665029	0.665036	0.665043	0.665045	0.154475	0.140485	0.139858	0.150113	0.163192
ENSG00000100197.23	CYP2D6	22:42089667:T:C	1.89407e-08	6.66607e-11	2.17277e-08	6.98996e-10	1.86654e-07	22:42089667:T:C-ENSG00000100197.23	0.723094	0.723099	0.7231	0.723105	0.723101	0.201332	0.14124	0.176568	0.173946	0.209864
ENSG00000205702.12	CYP2D7	22:42130482:C:A	8.68626e-08	1.81354e-09	6.06037e-07	5.9226e-08	4.95441e-07	22:42130482:C:A-ENSG00000205702.12	-0.531964	-0.532044	-0.532014	-0.532078	-0.532071	0.135977	0.110199	0.144374	0.137308	0.191743
ENSG00000130649.10	CYP2E1	10:133474523:G:A	0.0299965	0.0275824	0.00969784	0.039335	0.0330567	10:133474523:G:A-ENSG00000130649.10	0.291996	0.293663	0.306777	0.289094	0.291399	0.165146	0.171934	0.143951	0.196334	0.192338
ENSG00000233622.3	CYP2T1P	19:40809329:C:G	1.22258e-12	1.11022e-16	1.09912e-14	2.11053e-13	3.73035e-14	19:40809329:C:G-ENSG00000233622.3	-0.736543	-0.736544	-0.736545	-0.736545	-0.736546	0.173872	0.107815	0.131797	0.11815	0.13513
ENSG00000186204.15	CYP4F12	19:15641840:C:G	0.00142818	0.00111321	0.0010731	0.000687587	0.00101533	19:15641840:C:G-ENSG00000186204.15	-0.619769	-0.620016	-0.620057	-0.62051	-0.620096	0.26031	0.300602	0.286549	0.254487	0.284525
ENSG00000290541.1	CYP4F29P	21:13865800:T:C	1.38551e-15	3.64373e-13	1.09303e-14	2.32656e-16	6.9903e-14	21:13865800:T:C-ENSG00000290541.1	0.677955	0.677955	0.67796	0.677963	0.677961	0.117233	0.130558	0.121377	0.106488	0.115102
ENSG00000186529.16	CYP4F3	19:15646346:G:A	0.00237925	0.00371384	0.00377674	0.00342764	0.00397881	19:15646346:G:A-ENSG00000186529.16	-0.28597	-0.285226	-0.285586	-0.286192	-0.28532	0.134878	0.15887	0.140919	0.139825	0.119061
ENSG00000145476.16	CYP4V2	4:186193098:G:A	0.00314677	0.00316565	0.00312148	0.00247511	0.0030742	4:186193098:G:A-ENSG00000145476.16	0.784964	0.784981	0.785009	0.785435	0.784988	0.492258	0.426315	0.468252	0.339382	0.44722
ENSG00000122783.17	CYREN	7:135178736:C:T	0.0319296	0.0199522	0.040454	0.0409785	0.0401827	7:135178736:C:T-ENSG00000122783.17	0.247858	0.251876	0.246433	0.246112	0.245985	0.176411	0.136841	0.187595	0.170358	0.154052
ENSG00000197872.11	CYRIA	2:16660910:G:A	0.0920545	0.0880963	0.0852382	0.0491479	0.0705754	2:16660910:G:A-ENSG00000197872.11	0.27163	0.274025	0.273328	0.290929	0.278177	0.367818	0.3403	0.257532	0.174493	0.207496
ENSG00000153310.22	CYRIB	8:130012533:T:TA	0.120615	0.108703	0.0777837	0.0432007	0.0747697	8:130012533:T:TA-ENSG00000153310.22	0.0710195	0.0744396	0.0764327	0.0831097	0.077672	0.0883872	0.0686155	0.0540711	0.0503807	0.0742093
ENSG00000105443.17	CYTH2	19:48444069:G:T	0.000384326	0.000291331	5.33933e-05	0.000549262	0.000349509	19:48444069:G:T-ENSG00000105443.17	0.367151	0.367403	0.368275	0.367484	0.367717	0.160441	0.137269	0.0989931	0.170453	0.157556
ENSG00000170891.11	CYTL1	4:5019422:G:A	0.0110472	0.011753	0.0108786	0.0100568	0.00934941	4:5019422:G:A-ENSG00000170891.11	0.468817	0.468652	0.469007	0.469393	0.469442	0.29084	0.311172	0.280255	0.256828	0.221302
ENSG00000162384.14	CZIB	1:53226765:T:A	0.000647998	0.000720905	0.000866903	0.000863425	0.000865055	1:53226765:T:A-ENSG00000162384.14	-0.542748	-0.542718	-0.542737	-0.542758	-0.542747	0.245564	0.195265	0.246625	0.241778	0.266573
ENSG00000180902.18	D2HGDH	2:241745883:C:T	0.00085319	0.00100564	0.000857591	0.000754668	0.000137387	2:241745883:C:T-ENSG00000180902.18	-0.426844	-0.426771	-0.427014	-0.427263	-0.427775	0.231637	0.215594	0.171347	0.159825	0.126101
ENSG00000146122.17	DAAM2	6:39811750:A:C	4.42896e-06	3.37436e-06	5.36952e-06	7.63624e-06	1.26853e-05	6:39811750:A:C-ENSG00000146122.17	0.668042	0.668057	0.668061	0.668062	0.668055	0.237236	0.194233	0.209205	0.231156	0.24609
ENSG00000165617.16	DACT1	14:58630035:C:CT	0.000169123	0.000342474	0.000491095	0.00334771	0.00145328	14:58630035:C:CT-ENSG00000165617.16	0.342007	0.342225	0.342255	0.340343	0.34139	0.0992781	0.144602	0.134158	0.158769	0.195847
ENSG00000129562.11	DAD1	14:22564938:G:A	1.99974e-05	4.30258e-06	1.87507e-05	1.96915e-05	2.04598e-05	14:22564938:G:A-ENSG00000129562.11	0.562876	0.562986	0.562945	0.562956	0.562981	0.204513	0.167479	0.18166	0.163393	0.237263
ENSG00000164535.15	DAGLB	7:6437505:C:T	2.27197e-05	4.87974e-06	2.20324e-05	1.88586e-05	2.97847e-05	7:6437505:C:T-ENSG00000164535.15	0.410715	0.411076	0.41094	0.411087	0.411112	0.143947	0.116775	0.127052	0.121968	0.207917
ENSG00000196730.13	DAPK1	9:87531321:G:A	4.26732e-05	3.22223e-05	5.05818e-05	7.72435e-05	0.000108749	9:87531321:G:A-ENSG00000196730.13	0.556745	0.556813	0.556829	0.5568	0.556773	0.184471	0.171411	0.201762	0.232267	0.243698
ENSG00000183283.16	DAZAP2	12:51260367:T:G	0.0171341	0.0102784	0.0254232	0.0209775	0.0195031	12:51260367:T:G-ENSG00000183283.16	-0.213506	-0.215821	-0.210879	-0.212519	-0.212623	0.1713	0.111399	0.144647	0.121805	0.106307
ENSG00000161692.18	DBF4B	17:44750305:G:A	0.0237883	0.0251777	0.0263122	0.0270636	0.0284619	17:44750305:G:A-ENSG00000161692.18	0.323913	0.32362	0.323911	0.323437	0.322786	0.225188	0.239887	0.173443	0.196629	0.240494
ENSG00000155368.18	DBI	2:119370906:C:T	0.0175116	0.0166704	0.0169288	0.016918	0.00925706	2:119370906:C:T-ENSG00000155368.18	-0.304298	-0.304961	-0.304983	-0.304985	-0.307156	0.183876	0.194915	0.200591	0.187663	0.136667
ENSG00000003249.15	DBNDD1	16:90058463:G:T	0.00178571	0.00176103	0.00184409	0.00175236	0.0012178	16:90058463:G:T-ENSG00000003249.15	0.596516	0.596579	0.596562	0.596639	0.596905	0.317568	0.320846	0.253381	0.269154	0.251099
ENSG00000136279.21	DBNL	7:44037925:T:C	0.000618073	0.00014861	0.000284556	0.000388531	0.000901592	7:44037925:T:C-ENSG00000136279.21	-0.204576	-0.206471	-0.206591	-0.206142	-0.20541	0.0811495	0.0708655	0.0729395	0.0872272	0.106387
ENSG00000163257.11	DCAF16	4:17807941:GCA:G	0.0964229	0.0489961	0.109114	0.0980753	0.0984889	4:17807941:GCA:G-ENSG00000163257.11	-0.139534	-0.153591	-0.138406	-0.141298	-0.14023	0.101419	0.119666	0.139991	0.128145	0.129228
ENSG00000119599.17	DCAF4	14:72967514:G:A	0.42865	0.0455227	0.377933	0.507198	0.329896	14:72967514:G:A-ENSG00000119599.17	0.0842634	0.311126	0.112062	0.0611291	0.124177	0.165798	0.17096	0.194661	0.187363	0.229068
ENSG00000172992.13	DCAKD	17:45023913:A:C	5.16611e-05	2.3538e-05	0.000856442	0.00116491	5.52207e-05	17:45023913:A:C-ENSG00000172992.13	0.529246	0.529511	0.528309	0.528159	0.529249	0.201893	0.162531	0.216205	0.176845	0.179866
ENSG00000172795.17	DCP2	5:112983415:T:A	0.562162	0.601047	0.0101614	0.352414	0.243092	5:112983415:T:A-ENSG00000172795.17	-0.0139398	-0.00972949	-0.172779	-0.0519726	-0.0725078	0.0913342	0.083312	0.0673568	0.0925487	0.0603283
ENSG00000110063.10	DCPS	11:126278297:T:C	0.0148538	0.0217988	0.0256476	0.025498	0.0253596	11:126278297:T:C-ENSG00000110063.10	-0.297396	-0.295175	-0.294896	-0.29487	-0.294821	0.165701	0.178111	0.196438	0.178746	0.180595
ENSG00000232093.1	DCST1-AS1	1:155034523:C:T	0.159978	0.154283	0.15896	0.144937	0.00985204	1:155034523:C:T-ENSG00000232093.1	-0.231429	-0.234517	-0.232265	-0.238674	-0.300076	0.168539	0.179595	0.191401	0.183307	0.138283
ENSG00000166847.10	DCTN5	16:23665685:A:G	3.12839e-20	6.33476e-24	1.62204e-25	1.18561e-17	5.49633e-15	16:23665685:A:G-ENSG00000166847.10	0.878853	0.878853	0.878853	0.878853	0.878853	0.127041	0.0996163	0.104576	0.134933	0.154188
ENSG00000104671.8	DCTN6	8:30184400:A:G	0.785461	0.755824	0.618431	0.00307852	0.678465	8:30184400:A:G-ENSG00000104671.8	0.00771937	0.0273187	0.0919367	0.64587	0.0588103	0.205319	0.260467	0.185578	0.183262	0.199917
ENSG00000271869.2	DCTN6-DT	8:30137691:C:T	0.0125223	0.015503	0.016535	0.0153076	0.0152051	8:30137691:C:T-ENSG00000271869.2	-0.603164	-0.601974	-0.601863	-0.602348	-0.602263	0.327129	0.394813	0.50814	0.375625	0.370477
ENSG00000169738.8	DCXR	17:82036724:C:T	5.16489e-11	2.81544e-10	9.07735e-12	1.41216e-10	2.73029e-09	17:82036724:C:T-ENSG00000169738.8	0.750442	0.750443	0.750447	0.750446	0.750447	0.166842	0.189671	0.155619	0.158355	0.21223
ENSG00000213722.10	DDAH2	6:31749915:A:G	9.46451e-05	3.16662e-05	0.000100675	2.58512e-05	3.14407e-05	6:31749915:A:G-ENSG00000213722.10	-0.344623	-0.345317	-0.345351	-0.346205	-0.346045	0.115105	0.102645	0.151528	0.112019	0.149194
ENSG00000134574.12	DDB2	11:47260473:C:T	0.00517519	0.00397794	0.00236992	0.00414336	0.00583436	11:47260473:C:T-ENSG00000134574.12	-0.398282	-0.398794	-0.400702	-0.398944	-0.398184	0.314972	0.16671	0.15672	0.181866	0.244864
ENSG00000085788.14	DDHD2	8:38259219:C:CT	0.0472956	0.0119728	0.0482075	0.0492418	0.0468481	8:38259219:C:CT-ENSG00000085788.14	0.227315	0.238625	0.22826	0.228188	0.228227	0.14118	0.108446	0.146373	0.210446	0.176036
ENSG00000165490.13	DDIAS	11:82933722:C:G	0.0221148	0.0238302	0.0244751	0.0249146	0.0250956	11:82933722:C:G-ENSG00000165490.13	-0.422337	-0.421941	-0.422354	-0.422039	-0.421788	0.212673	0.25458	0.278274	0.43565	0.424918
ENSG00000168209.6	DDIT4	10:72232186:C:CA	0.0662894	0.0727607	0.0814074	0.0664245	0.0425459	10:72232186:C:CA-ENSG00000168209.6	-0.265495	-0.263184	-0.259834	-0.265692	-0.275658	0.2423	0.199196	0.226211	0.182612	0.214007
ENSG00000244038.11	DDOST	1:20650728:A:T	0.107425	0.130647	0.104141	0.0964439	0.00286542	1:20650728:A:T-ENSG00000244038.11	0.314467	0.306229	0.316552	0.322623	0.380922	0.189235	0.210285	0.192644	0.224976	0.143094
ENSG00000204580.14	DDR1	6:30925951:C:T	0.00465847	0.00664872	0.00734582	0.00630373	0.00732037	6:30925951:C:T-ENSG00000204580.14	0.429418	0.428354	0.428298	0.428932	0.428346	0.236076	0.228453	0.225022	0.178356	0.252316
ENSG00000013573.17	DDX11	12:31101061:C:T	0	0	0	0	2.22045e-16	12:31101061:C:T-ENSG00000013573.17	-0.959193	-0.959193	-0.959193	-0.959193	-0.959193	0.104061	0.100299	0.107574	0.0848836	0.149722
ENSG00000290355.1	DDX11L16	16:55320:A:G	4.0689e-05	3.83093e-05	4.2085e-05	3.80519e-05	3.86261e-05	16:55320:A:G-ENSG00000290355.1	-0.591166	-0.591207	-0.591236	-0.591281	-0.591267	0.200323	0.216256	0.215198	0.212609	0.231965
ENSG00000236397.3	DDX11L2	2:113599773:T:C	2.25477e-30	9.65906e-23	1.24123e-28	1.93162e-22	6.35369e-23	2:113599773:T:C-ENSG00000236397.3	1.08014	1.08014	1.08014	1.08014	1.08014	0.122129	0.146992	0.115245	0.125481	0.136353
ENSG00000214826.5	DDX12P	12:9419003:C:A	1.59182e-09	1.57468e-10	6.65486e-11	4.07689e-10	3.15052e-13	12:9419003:C:A-ENSG00000214826.5	0.525418	0.525462	0.525519	0.525537	0.525605	0.117675	0.112189	0.106582	0.112118	0.105317
ENSG00000124228.15	DDX27	20:49234220:T:G	0.0260346	0.045845	0.0360417	0.0369718	0.0322469	20:49234220:T:G-ENSG00000124228.15	-0.19935	-0.193098	-0.197021	-0.196471	-0.198336	0.117807	0.13891	0.141884	0.141259	0.130384
ENSG00000125485.18	DDX31	9:132694532:A:G	1.91822e-05	0.000113988	1.23963e-05	8.29152e-06	1.36856e-05	9:132694532:A:G-ENSG00000125485.18	0.424132	0.423955	0.424498	0.424933	0.424672	0.137452	0.14628	0.121025	0.151535	0.153553
ENSG00000123136.15	DDX39A	19:14398375:A:G	0.0598891	0.278483	0.0163561	0.10326	0.12099	19:14398375:A:G-ENSG00000123136.15	0.186795	0.0853619	0.203142	0.140954	0.138955	0.177561	0.158438	0.0901276	0.102459	0.108513
ENSG00000080007.8	DDX43	6:73377432:A:AAG	0.00305115	0.00363469	0.00414447	0.00403617	0.00234681	6:73377432:A:AAG-ENSG00000080007.8	0.485465	0.485252	0.485114	0.485231	0.486198	0.190597	0.264621	0.249736	0.276896	0.221219
ENSG00000108654.16	DDX5	17:64472458:T:G	0.000422193	0.00107641	0.00122887	0.0019295	0.00119407	17:64472458:T:G-ENSG00000108654.16	-0.234426	-0.233432	-0.233532	-0.233221	-0.234123	0.105903	0.0892378	0.0815216	0.12337	0.11015
ENSG00000185163.10	DDX51	12:132096194:C:T	0.0151487	0.0575792	0.0578669	0.0840974	0.0582407	12:132096194:C:T-ENSG00000185163.10	-0.289059	-0.261118	-0.263915	-0.252706	-0.262799	0.185265	0.155606	0.170364	0.187667	0.161424
ENSG00000278053.5	DDX52	17:37623901:T:C	1.1686e-06	6.26999e-06	2.10628e-06	1.34829e-06	4.35e-06	17:37623901:T:C-ENSG00000278053.5	-0.492058	-0.491996	-0.49217	-0.492289	-0.492203	0.132688	0.152841	0.156664	0.142347	0.18709
ENSG00000111364.16	DDX55	12:123617669:G:A	0.00281633	0.000109156	0.000780923	0.00078737	0.000695928	12:123617669:G:A-ENSG00000111364.16	-0.414569	-0.416954	-0.416028	-0.416389	-0.416343	0.183525	0.121309	0.149977	0.204165	0.184193
ENSG00000118197.14	DDX59	1:200649903:C:T	7.64662e-05	5.95788e-05	8.4991e-05	7.4519e-05	4.41638e-05	1:200649903:C:T-ENSG00000118197.14	-0.379468	-0.379705	-0.379693	-0.379942	-0.380202	0.151745	0.116169	0.134911	0.145379	0.139447
ENSG00000110367.14	DDX6	11:118745160:C:CT	0.148366	0.150058	0.135923	0.140571	0.0469144	11:118745160:C:CT-ENSG00000110367.14	0.144217	0.144226	0.146815	0.145518	0.170585	0.16878	0.149659	0.111072	0.133983	0.136805
ENSG00000177030.19	DEAF1	11:696036:C:T	6.90303e-06	2.69453e-05	3.86115e-05	6.92573e-05	2.54301e-05	11:696036:C:T-ENSG00000177030.19	0.419814	0.419652	0.419709	0.419731	0.419855	0.137852	0.142681	0.139951	0.159199	0.118945
ENSG00000104325.7	DECR1	8:89983743:T:C	0.00450978	0.00509861	0.00536174	0.00420419	0.00586559	8:89983743:T:C-ENSG00000104325.7	-0.283524	-0.283383	-0.283539	-0.284662	-0.283494	0.130342	0.149779	0.141524	0.125836	0.205304
ENSG00000023892.12	DEF6	6:35317766:G:C	4.6182e-05	4.81995e-05	2.75127e-05	4.59344e-05	5.42299e-05	6:35317766:G:C-ENSG00000023892.12	0.301017	0.300822	0.301954	0.301516	0.301215	0.133914	0.098062	0.097604	0.113583	0.100456
ENSG00000140995.17	DEF8	16:89956997:C:A	0.062378	0.0628882	0.0630105	0.0617335	0.0241668	16:89956997:C:A-ENSG00000140995.17	-0.180978	-0.180844	-0.180768	-0.181477	-0.189649	0.199829	0.123031	0.121282	0.16767	0.10694
ENSG00000239839.7	DEFA3	8:7016203:T:C	1.35454e-10	1.95377e-09	1.99045e-10	2.76911e-10	8.94109e-11	8:7016203:T:C-ENSG00000239839.7	-0.756225	-0.756225	-0.756229	-0.756231	-0.756232	0.181453	0.1792	0.171045	0.180458	0.193255
ENSG00000124795.17	DEK	6:18224942:C:T	0.010499	0.0924642	0.0450361	0.0672045	0.0997973	6:18224942:C:T-ENSG00000124795.17	-0.260311	-0.21245	-0.240999	-0.221322	-0.211534	0.137123	0.163743	0.132589	0.142254	0.143514
ENSG00000162777.17	DENND2D	1:111197723:C:G	0.000516775	0.0017801	0.002529	0.00252713	0.00231681	1:111197723:C:G-ENSG00000162777.17	0.333875	0.333241	0.332968	0.333118	0.333258	0.117368	0.135649	0.153832	0.162645	0.148093
ENSG00000105339.11	DENND3	8:141094233:G:C	0.0472382	0.125632	0.138317	0.137828	0.146178	8:141094233:G:C-ENSG00000105339.11	-0.11628	-0.0995204	-0.0999685	-0.0998817	-0.098225	0.0803797	0.0845072	0.0923597	0.0943098	0.0959625
ENSG00000253210.4	DENND3-AS1	8:141128761:C:G	0	1.9984e-15	9.55902e-14	0	2.20934e-14	8:141128761:C:G-ENSG00000253210.4	-0.772728	-0.772728	-0.772729	-0.772729	-0.772729	0.103538	0.119527	0.151165	0.114076	0.141546
ENSG00000198837.10	DENND4B	1:153959794:C:T	0.00241317	0.00236701	0.00182613	0.00183319	0.000947238	1:153959794:C:T-ENSG00000198837.10	0.588483	0.588545	0.588888	0.588897	0.589433	0.400362	0.291848	0.270213	0.285191	0.210162
ENSG00000170456.16	DENND5B	12:31595447:T:C	0.0474552	0.0466046	0.0377976	0.0346453	0.0269128	12:31595447:T:C-ENSG00000170456.16	0.211546	0.212382	0.214248	0.215684	0.21687	0.153867	0.15715	0.160064	0.163552	0.129804
ENSG00000174839.13	DENND6A	3:57671484:C:T	0.00293541	0.00295582	0.00241531	0.00221541	0.00182678	3:57671484:C:T-ENSG00000174839.13	0.524126	0.524205	0.524515	0.524742	0.524816	0.256958	0.31836	0.254577	0.259742	0.20294
ENSG00000099958.15	DERL3	22:23867863:A:C	0.465906	0.0445202	0.464689	0.462459	0.407807	22:23867863:A:C-ENSG00000099958.15	-0.0880334	-0.27885	-0.097293	-0.0972201	-0.106382	0.216171	0.150416	0.225662	0.200411	0.199975
ENSG00000182108.11	DEXI	16:10911182:A:T	0.000254989	9.68912e-05	0.000137186	0.000169588	5.45721e-05	16:10911182:A:T-ENSG00000182108.11	-0.285521	-0.286601	-0.28619	-0.286006	-0.287156	0.13678	0.107519	0.0972612	0.0931082	0.0980881
ENSG00000160049.12	DFFA	1:10453674:C:CT	0.0336598	0.0368273	0.0394445	0.0361959	0.022303	1:10453674:C:CT-ENSG00000160049.12	-0.229785	-0.228987	-0.228547	-0.22986	-0.233569	0.141053	0.146418	0.171929	0.172118	0.145242
ENSG00000169598.17	DFFB	1:3830459:C:G	0.0421267	0.355545	0.255586	0.296277	0.279045	1:3830459:C:G-ENSG00000169598.17	-0.339567	-0.151851	-0.209552	-0.191075	-0.20557	0.187092	0.391873	0.26527	0.33717	0.343382
ENSG00000062282.15	DGAT2	11:75799616:T:A	0.76818	0.0152879	0.811231	0.809069	0.837979	11:75799616:T:A-ENSG00000062282.15	0.0158642	0.19112	0.0101635	0.010113	0.00473047	0.0974766	0.0639358	0.0794139	0.0708765	0.0747222
ENSG00000070413.20	DGCR2	22:19110727:A:G	0.0430662	0.0428459	0.0392001	0.033485	0.0342365	22:19110727:A:G-ENSG00000070413.20	0.268516	0.268947	0.269699	0.272215	0.270786	0.218596	0.196022	0.201901	0.206908	0.160439
ENSG00000128185.10	DGCR6L	22:20319470:C:T	0.0547148	0.0563949	0.0578918	0.0544109	0.00684334	22:20319470:C:T-ENSG00000128185.10	-0.18719	-0.186799	-0.186183	-0.188144	-0.200926	0.121981	0.116841	0.103299	0.120729	0.0983081
ENSG00000128191.17	DGCR8	22:20083433:C:A	0.00132616	0.00101752	0.000986681	0.000750984	0.000970959	22:20083433:C:A-ENSG00000128191.17	0.562485	0.562745	0.56278	0.563118	0.562835	0.27331	0.252087	0.210375	0.22921	0.311741
ENSG00000077044.11	DGKD	2:233314221:C:CA	0.0135622	0.00811664	0.00122161	0.00625584	0.00642468	2:233314221:C:CA-ENSG00000077044.11	0.372306	0.374879	0.380302	0.376195	0.375771	0.246688	0.218239	0.120815	0.211535	0.17404
ENSG00000145214.14	DGKQ	4:967585:G:A	2.13573e-26	2.35217e-31	2.52688e-21	2.6043e-32	1.53093e-23	4:967585:G:A-ENSG00000145214.14	0.92724	0.92724	0.92724	0.92724	0.92724	0.117422	0.095148	0.121243	0.0876695	0.107905
ENSG00000149091.15	DGKZ	11:46372207:C:T	0.00467711	0.00517048	0.0041123	0.003252	0.00455298	11:46372207:C:T-ENSG00000149091.15	-0.30635	-0.306091	-0.307212	-0.307806	-0.306749	0.184172	0.152898	0.177894	0.119807	0.159582
ENSG00000133943.21	DGLUCY	14:91016867:CAA:C	0.00899097	0.00853463	0.0110176	0.010534	0.0101443	14:91016867:CAA:C-ENSG00000133943.21	0.33971	0.340072	0.339466	0.339747	0.339829	0.183705	0.179069	0.17918	0.175788	0.210531
ENSG00000157379.14	DHRS1	14:24294589:A:AAACAAC	0.00039323	0.000257035	0.000398099	0.000415736	0.000394489	14:24294589:A:AAACAAC-ENSG00000157379.14	0.390627	0.391004	0.390978	0.390943	0.391102	0.165987	0.136132	0.150768	0.141334	0.225336
ENSG00000162496.9	DHRS3	1:12574951:C:G	0.0566276	0.0481491	0.0748366	0.084945	0.0906169	1:12574951:C:G-ENSG00000162496.9	-0.274313	-0.278791	-0.270626	-0.265772	-0.26273	0.191828	0.186777	0.236452	0.285163	0.240721
ENSG00000157326.19	DHRS4	14:24000929:C:T	0.0106379	0.0114991	0.0107696	0.0108084	0.007406	14:24000929:C:T-ENSG00000157326.19	0.458674	0.458448	0.458884	0.458813	0.460143	0.231885	0.287074	0.285579	0.246214	0.231345
ENSG00000215256.6	DHRS4-AS1	14:24060000:C:T	0.111071	0.0900467	0.155776	0.0363168	0.149119	14:24060000:C:T-ENSG00000215256.6	0.251272	0.263798	0.232299	0.303714	0.235281	0.236654	0.2181	0.276223	0.162546	0.24484
ENSG00000100612.14	DHRS7	14:60149196:C:T	0.0677725	0.0609511	0.0570825	0.0717287	0.00891148	14:60149196:C:T-ENSG00000100612.14	0.231662	0.234492	0.236304	0.230684	0.250745	0.201709	0.167556	0.152379	0.155749	0.107974
ENSG00000109016.18	DHRS7B	17:21112445:C:T	0.000686766	0.00964136	0.00620814	0.00621996	0.111442	17:21112445:C:T-ENSG00000109016.18	-0.268618	-0.244	-0.253691	-0.247804	-0.206416	0.100807	0.109453	0.119669	0.093807	0.139004
ENSG00000073737.17	DHRS9	2:169105387:T:C	0.000474594	0.000558839	0.000569973	0.00023434	0.000880242	2:169105387:T:C-ENSG00000073737.17	0.263107	0.263307	0.263595	0.265242	0.26331	0.0919488	0.114958	0.109835	0.101881	0.117912
ENSG00000134815.19	DHX34	19:47395531:G:A	0.00927942	0.00993934	0.0110183	0.00265155	0.00967494	19:47395531:G:A-ENSG00000134815.19	0.196878	0.196865	0.196463	0.201475	0.197305	0.101934	0.112314	0.10397	0.0838489	0.100966
ENSG00000163214.21	DHX57	2:38855202:T:C	0.00169352	0.000822252	0.00110596	0.000735691	0.000872871	2:38855202:T:C-ENSG00000163214.21	0.349856	0.351054	0.350775	0.35171	0.351219	0.154308	0.141212	0.157959	0.134946	0.160138
ENSG00000131504.18	DIAPH1	5:141598318:T:C	0.0101257	0.00939649	0.00898882	0.00802028	0.00933703	5:141598318:T:C-ENSG00000131504.18	0.394384	0.394937	0.395231	0.395842	0.394861	0.22862	0.237396	0.210942	0.204867	0.198136
ENSG00000101191.17	DIDO1	20:62963141:G:A	0.0584852	0.0498108	0.0705834	0.0683776	0.0643004	20:62963141:G:A-ENSG00000101191.17	-0.160776	-0.162842	-0.159255	-0.159553	-0.160232	0.186893	0.116323	0.133833	0.110628	0.139906
ENSG00000160305.18	DIP2A	21:46416739:C:T	3.95175e-06	3.03819e-06	5.93368e-07	4.95405e-07	2.60905e-08	21:46416739:C:T-ENSG00000160305.18	0.474891	0.475085	0.475255	0.475446	0.475631	0.115509	0.147294	0.118567	0.150641	0.131699
ENSG00000176490.5	DIRAS1	19:2710488:C:T	0.00811991	0.00785262	0.0079306	0.00504305	0.00642316	19:2710488:C:T-ENSG00000176490.5	0.368521	0.36889	0.368815	0.37101	0.369693	0.197145	0.216902	0.1851	0.175279	0.180405
ENSG00000083520.15	DIS3	13:72741128:G:C	0.500689	0.0484775	0.456577	0.260667	0.0427755	13:72741128:G:C-ENSG00000083520.15	0.0121765	-0.305629	-0.0294627	0.123433	-0.243229	0.159752	0.151603	0.171511	0.16962	0.126552
ENSG00000162946.23	DISC1	1:231660661:G:A	0.0024724	0.00422683	0.00373375	0.00465501	0.00179077	1:231660661:G:A-ENSG00000162946.23	-0.334634	-0.333413	-0.334116	-0.333532	-0.335922	0.129635	0.172473	0.173831	0.147523	0.152197
ENSG00000140323.6	DISP2	15:40392186:G:GTT	0.00304497	0.00238515	0.00292336	0.00294759	0.00315309	15:40392186:G:GTT-ENSG00000140323.6	0.545893	0.546342	0.546175	0.546141	0.545983	0.27589	0.238595	0.255015	0.260623	0.30909
ENSG00000008226.20	DLEC1	3:38043889:A:C	0.0325452	0.0331981	0.0302426	0.0282179	0.0173683	3:38043889:A:C-ENSG00000008226.20	-0.293542	-0.293564	-0.294645	-0.295626	-0.298992	0.180396	0.168447	0.233355	0.201767	0.178904
ENSG00000231607.15	DLEU2	13:50087165:T:TA	0.00931274	0.00792859	0.00570555	0.00611952	0.00552889	13:50087165:T:TA-ENSG00000231607.15	0.177302	0.178523	0.179783	0.179288	0.179209	0.11853	0.11097	0.0861729	0.0969182	0.0817116
ENSG00000177337.10	DLGAP1-AS1	18:3596555:CT:C	0.0587626	0.0428378	0.0148717	0.0592857	0.0565978	18:3596555:CT:C-ENSG00000177337.10	-0.246295	-0.253952	-0.269999	-0.246735	-0.2474	0.157248	0.178655	0.12645	0.223385	0.17937
ENSG00000262001.3	DLGAP1-AS2	18:3600048:C:T	0.0265888	0.025862	0.0263157	0.0262133	0.0248535	18:3600048:C:T-ENSG00000262001.3	0.207151	0.207593	0.208267	0.20812	0.208224	0.133854	0.114479	0.161203	0.164628	0.147352
ENSG00000119689.15	DLST	14:74842719:C:CA	0.039587	0.0350969	0.00277255	0.0408939	0.0496701	14:74842719:C:CA-ENSG00000119689.15	-0.190922	-0.192366	-0.20424	-0.19075	-0.188548	0.13423	0.127262	0.0704977	0.113517	0.123535
ENSG00000105341.19	DMAC2	19:41441337:C:G	0.0240672	0.0257071	0.0186402	0.0130367	0.0260681	19:41441337:C:G-ENSG00000105341.19	0.320264	0.320013	0.323775	0.328487	0.319696	0.176308	0.23189	0.170674	0.188629	0.216133
ENSG00000178028.14	DMAP1	1:44220650:T:C	0.00979418	0.0047599	0.0104835	0.00933904	0.0102721	1:44220650:T:C-ENSG00000178028.14	0.213022	0.215161	0.213467	0.214181	0.213569	0.130437	0.0897283	0.130148	0.105061	0.139668
ENSG00000104936.20	DMPK	19:45770913:A:C	0.000209432	0.00039606	0.000259362	0.000175123	4.89912e-05	19:45770913:A:C-ENSG00000104936.20	0.287767	0.287223	0.287886	0.288628	0.289143	0.120856	0.120479	0.113257	0.0921208	0.0930959
ENSG00000142025.16	DMRTC2	19:41823430:C:T	0.00229623	0.00061748	0.0014641	0.00130452	0.0024197	19:41823430:C:T-ENSG00000142025.16	0.449356	0.451102	0.450154	0.450464	0.449586	0.209422	0.174562	0.188414	0.177081	0.210842
ENSG00000135164.19	DMTF1	7:87159697:C:G	0.024085	0.0328931	0.0368524	0.0235755	0.0290334	7:87159697:C:G-ENSG00000135164.19	0.207731	0.203648	0.202706	0.207882	0.205399	0.18546	0.141269	0.140211	0.106024	0.141138
ENSG00000104093.14	DMXL2	15:51629269:C:T	0.0428216	0.0410041	0.0368167	0.033205	0.0355361	15:51629269:C:T-ENSG00000104093.14	0.266704	0.267869	0.268596	0.269931	0.268617	0.19967	0.281767	0.166844	0.17334	0.193591
ENSG00000138346.15	DNA2	10:68482756:T:C	0.00472147	0.0104621	0.0106167	0.00977509	0.00950068	10:68482756:T:C-ENSG00000138346.15	-0.325224	-0.322728	-0.323036	-0.323494	-0.323837	0.158588	0.196093	0.170876	0.140024	0.183859
ENSG00000129295.10	DNAAF11	8:132710035:T:C	2.34224e-12	4.30767e-14	1.22125e-15	0	1.11022e-16	8:132710035:T:C-ENSG00000129295.10	-0.621722	-0.621733	-0.621746	-0.621765	-0.621747	0.11124	0.108942	0.0982991	0.0851497	0.0830627
ENSG00000164818.16	DNAAF5	7:716846:G:C	0.025126	0.0463497	0.0488264	0.0524543	0.0474094	7:716846:G:C-ENSG00000164818.16	-0.213162	-0.207123	-0.207885	-0.206617	-0.208218	0.125104	0.153189	0.138076	0.157339	0.15836
ENSG00000114841.18	DNAH1	3:52289328:G:A	0.014899	0.0461406	0.0516093	0.0467408	0.0487754	3:52289328:G:A-ENSG00000114841.18	-0.283427	-0.270921	-0.269757	-0.271844	-0.270631	0.168628	0.225343	0.180465	0.171262	0.145222
ENSG00000171595.14	DNAI2	17:74249962:T:C	0.00293253	0.00177839	0.00306958	0.00309427	0.00310211	17:74249962:T:C-ENSG00000171595.14	0.411508	0.4122	0.411839	0.411861	0.411817	0.201175	0.144467	0.210369	0.208155	0.263675
ENSG00000140403.13	DNAJA4	15:78265378:C:G	0.0254226	0.0151111	0.0187571	0.00255371	0.00111706	15:78265378:C:G-ENSG00000140403.13	0.521481	0.526705	0.525034	0.541659	0.542651	0.327611	0.258748	0.311906	0.242807	0.190065
ENSG00000137094.16	DNAJB5	9:34972857:C:T	0.000456153	0.000359838	0.000357872	0.000413272	0.000464898	9:34972857:C:T-ENSG00000137094.16	0.551609	0.551763	0.551871	0.551779	0.551735	0.244083	0.225215	0.20343	0.220932	0.247851
ENSG00000105993.15	DNAJB6	7:157370374:A:T	2.31265e-12	1.17501e-08	2.23793e-09	6.15118e-09	1.06244e-08	7:157370374:A:T-ENSG00000105993.15	0.535412	0.53538	0.535434	0.535447	0.535448	0.0935436	0.130529	0.126385	0.130037	0.138197
ENSG00000120675.6	DNAJC15	13:43023729:A:G	5.61073e-12	1.3247e-10	5.675e-11	2.20976e-09	7.94675e-10	13:43023729:A:G-ENSG00000120675.6	-0.794273	-0.794273	-0.794275	-0.794275	-0.794275	0.167539	0.186627	0.186725	0.234181	0.166241
ENSG00000116138.13	DNAJC16	1:15494556:C:A	0.297041	0.450061	0.355336	8.13609e-05	0.335166	1:15494556:C:A-ENSG00000116138.13	0.187398	0.128254	0.158798	0.359372	0.168308	0.153578	0.165596	0.134268	0.0841188	0.158573
ENSG00000170464.10	DNAJC18	5:139483159:A:G	0.0442615	0.0958274	0.17809	0.164908	0.151805	5:139483159:A:G-ENSG00000170464.10	-0.263257	-0.23423	-0.206949	-0.210929	-0.215532	0.184313	0.186235	0.203023	0.230059	0.214951
ENSG00000105821.15	DNAJC2	7:103364959:CAT:C	0.610895	0.617909	0.591486	0.0155597	0.744856	7:103364959:CAT:C-ENSG00000105821.15	-0.060887	-0.0508185	-0.0677469	0.474558	0.00885585	0.15504	0.133473	0.130518	0.140585	0.173701
ENSG00000168724.18	DNAJC21	5:34952718:A:G	0.00956467	0.00110182	0.0443718	0.0140111	0.025051	5:34952718:A:G-ENSG00000168724.18	0.300963	0.308586	0.28303	0.295683	0.28995	0.14285	0.108693	0.133786	0.150035	0.172087
ENSG00000115137.12	DNAJC27	2:24936632:G:C	0.0430231	0.132737	0.137854	0.0861645	0.103904	2:24936632:G:C-ENSG00000115137.12	0.210835	0.170627	0.17038	0.188991	0.18317	0.163177	0.223557	0.152346	0.118398	0.193239
ENSG00000101152.12	DNAJC5	20:63928611:G:A	0.0427113	0.0746579	0.0641909	0.0620413	0.0861032	20:63928611:G:A-ENSG00000101152.12	-0.235409	-0.223785	-0.229386	-0.230134	-0.221103	0.150427	0.193641	0.18049	0.181685	0.206385
ENSG00000126698.11	DNAJC8	1:28200500:A:G	0.000534411	0.000694419	0.000881014	0.00090626	0.000671952	1:28200500:A:G-ENSG00000126698.11	-0.234981	-0.235071	-0.235169	-0.234979	-0.235337	0.0847822	0.117001	0.147812	0.111492	0.0845044
ENSG00000105612.10	DNASE2	19:12878746:G:A	3.41172e-13	0	5.09148e-13	0	1.75583e-11	19:12878746:G:A-ENSG00000105612.10	-0.807986	-0.807986	-0.807987	-0.807987	-0.807987	0.152352	0.132319	0.144978	0.117299	0.170383
ENSG00000179532.13	DNHD1	11:6537469:A:G	0.0755379	0.07202	0.0663818	0.0356195	0.0985591	11:6537469:A:G-ENSG00000179532.13	0.264392	0.26625	0.268943	0.290424	0.253605	0.187981	0.224493	0.2017	0.177601	0.28084
ENSG00000101457.13	DNTTIP1	20:45810575:CTT:C	0.751841	0.690753	0.00650814	0.751156	0.753108	20:45810575:CTT:C-ENSG00000101457.13	0.019452	0.0356144	0.269962	0.0194258	0.0190762	0.0975468	0.109232	0.0802802	0.0842848	0.09269
ENSG00000067334.14	DNTTIP2	1:93878405:G:A	0.0225537	0.57914	0.694435	0.71288	0.617048	1:93878405:G:A-ENSG00000067334.14	0.437123	0.0519062	0.0135462	0.00412262	-0.0446012	0.180792	0.216217	0.220146	0.207278	0.248304
ENSG00000231793.7	DOC2GP	11:67607713:T:G	5.84748e-08	1.20227e-08	5.97501e-10	7.84504e-10	2.93235e-12	11:67607713:T:G-ENSG00000231793.7	0.648341	0.648351	0.648372	0.648381	0.648391	0.168816	0.153936	0.144314	0.157908	0.121515
ENSG00000135905.21	DOCK10	2:225000225:GAC:G	0.0200638	0.0143082	0.0240703	0.0230054	0.0208603	2:225000225:GAC:G-ENSG00000135905.21	-0.13492	-0.13696	-0.134782	-0.135202	-0.135923	0.0807237	0.0739886	0.0882813	0.0801172	0.09559
ENSG00000147459.18	DOCK5	8:25207744:G:T	0.127543	0.142525	0.118477	0.126737	0.0432004	8:25207744:G:T-ENSG00000147459.18	0.0758662	0.07276	0.0768106	0.0751085	0.0872692	0.0959038	0.0653062	0.0637315	0.074204	0.0507685
ENSG00000130158.14	DOCK6	19:11303206:G:A	0.0493055	0.0862292	0.0929309	0.0888047	0.0999036	19:11303206:G:A-ENSG00000130158.14	0.290038	0.274752	0.275004	0.276244	0.271664	0.218395	0.195288	0.272547	0.230255	0.287858
ENSG00000107099.18	DOCK8	9:214864:C:T	0.000489826	0.000167146	8.01057e-05	0.000532444	0.000285865	9:214864:C:T-ENSG00000107099.18	-0.224285	-0.225923	-0.227247	-0.224663	-0.225999	0.0907787	0.0819783	0.0753698	0.0798294	0.102927
ENSG00000183784.7	DOCK8-AS1	9:258349:G:GCCT	0.535631	0.187838	0.0156434	0.250039	0.513701	9:258349:G:GCCT-ENSG00000183784.7	-0.0106682	0.180851	0.47032	-0.136047	0.018136	0.167096	0.175466	0.156173	0.157429	0.203051
ENSG00000088387.22	DOCK9	13:99056251:T:C	0.000898263	0.000546967	0.000576141	0.000596762	0.000600967	13:99056251:T:C-ENSG00000088387.22	0.290543	0.291513	0.291957	0.292023	0.291677	0.13239	0.107298	0.11864	0.143149	0.119859
ENSG00000115325.14	DOK1	2:74559165:AT:A	0.00143923	0.0669387	0.152199	0.148482	0.117947	2:74559165:AT:A-ENSG00000115325.14	-0.205668	-0.179665	-0.158397	-0.158689	-0.170109	0.0728146	0.0904251	0.0936796	0.143763	0.150817
ENSG00000147443.13	DOK2	8:21907020:T:C	0.0303265	0.0452502	0.0672481	0.00314271	0.0326922	8:21907020:T:C-ENSG00000147443.13	0.151416	0.147451	0.142225	0.162433	0.150328	0.107232	0.123016	0.0840078	0.0598104	0.0860535
ENSG00000146094.16	DOK3	5:177543802:G:A	0.00160799	0.0011169	0.00109132	0.00077823	0.00151768	5:177543802:G:A-ENSG00000146094.16	-0.15126	-0.152037	-0.15167	-0.153622	-0.151677	0.099146	0.0666756	0.0519335	0.0714568	0.0754393
ENSG00000175920.18	DOK7	4:3478699:C:T	0.00281361	0.00316449	0.00266775	0.00251456	0.00177632	4:3478699:C:T-ENSG00000175920.18	0.634929	0.634786	0.635049	0.63513	0.635538	0.394632	0.377568	0.354267	0.258688	0.268869
ENSG00000166171.13	DPCD	10:101529561:G:A	0.034537	0.0319625	0.0273747	0.0285891	0.0277162	10:101529561:G:A-ENSG00000166171.13	-0.31051	-0.31172	-0.313537	-0.312699	-0.312604	0.256683	0.182078	0.191086	0.231289	0.2163
ENSG00000167261.14	DPEP2	16:68041536:A:G	0.0555946	0.0557109	0.0606492	0.0644073	0.0193043	16:68041536:A:G-ENSG00000167261.14	-0.225846	-0.226078	-0.22431	-0.223333	-0.235944	0.210972	0.163951	0.143493	0.20294	0.118491
ENSG00000141096.6	DPEP3	16:67998295:GC:G	0.0188545	0.0719664	0.0313895	0.0777118	0.0369744	16:67998295:GC:G-ENSG00000141096.6	-0.338206	-0.299924	-0.324093	-0.29765	-0.316033	0.223025	0.225388	0.182002	0.247752	0.182864
ENSG00000133884.11	DPF2	11:65355211:G:C	0.00776522	0.036501	0.0322645	0.0457685	0.0313479	11:65355211:G:C-ENSG00000133884.11	0.197264	0.183545	0.187835	0.182096	0.187527	0.114389	0.0949682	0.112904	0.118301	0.10074
ENSG00000148399.13	DPH7	9:137569589:G:A	0.0411134	0.000524079	0.0353605	0.0152706	0.0273366	9:137569589:G:A-ENSG00000148399.13	-0.329353	-0.36395	-0.330868	-0.345552	-0.336577	0.201418	0.129801	0.132259	0.134079	0.230654
ENSG00000254986.8	DPP3	11:66453449:CTATTTATT:C	0.0182341	0.0113454	0.0159516	0.0154754	0.00375274	11:66453449:CTATTTATT:C-ENSG00000254986.8	0.226717	0.230733	0.228229	0.228583	0.232786	0.135261	0.120838	0.134156	0.131045	0.0919654
ENSG00000255517.8	DPP3-DT	11:66453449:CTATTTATT:C	0.00924996	0.094262	0.0767662	0.0734446	0.0875679	11:66453449:CTATTTATT:C-ENSG00000255517.8	0.355019	0.30797	0.315986	0.317926	0.311968	0.178086	0.222417	0.195149	0.191646	0.202127
ENSG00000197635.11	DPP4	2:162066218:A:G	0.0217709	0.0251093	0.0308009	0.0296572	0.0280021	2:162066218:A:G-ENSG00000197635.11	0.29095	0.29015	0.289171	0.289627	0.289994	0.162495	0.201325	0.173834	0.207472	0.206398
ENSG00000176978.15	DPP7	9:137112039:C:T	0.0481672	0.0120564	0.0498847	0.0466777	0.0464791	9:137112039:C:T-ENSG00000176978.15	-0.150631	-0.161198	-0.150807	-0.1522	-0.15182	0.107933	0.0894218	0.0872505	0.0888838	0.103716
ENSG00000121570.13	DPPA4	3:109323989:C:G	0.0130211	0.012637	0.0114879	0.0124258	0.0104705	3:109323989:C:G-ENSG00000121570.13	0.395624	0.395933	0.396603	0.396107	0.396751	0.245107	0.217715	0.18485	0.281051	0.236432
ENSG00000267213.4	DPY19L3-DT	19:32386219:G:A	0.0662894	0.0759359	0.0241728	0.0693739	0.078654	19:32386219:G:A-ENSG00000267213.4	0.285502	0.281561	0.313708	0.283742	0.280256	0.218693	0.236815	0.166318	0.197474	0.215789
ENSG00000162961.14	DPY30	2:32001220:T:C	0.728365	0.624688	0.720362	0.00158814	0.682652	2:32001220:T:C-ENSG00000162961.14	0.0313394	0.102055	-0.03161	-0.758437	0.0585938	0.359224	0.312394	0.27309	0.207517	0.348614
ENSG00000117505.13	DR1	1:93339644:T:G	0.00648646	0.0254523	0.02539	0.0289235	0.0210387	1:93339644:T:G-ENSG00000117505.13	-0.171412	-0.165557	-0.166341	-0.165006	-0.168604	0.0775388	0.108981	0.0964612	0.0864435	0.0974334
ENSG00000156171.15	DRAM2	1:111183591:A:G	5.39196e-05	3.71101e-05	1.19587e-05	5.08196e-06	5.02894e-05	1:111183591:A:G-ENSG00000156171.15	0.403988	0.404299	0.404921	0.405308	0.404713	0.118483	0.13834	0.132636	0.123139	0.156218
ENSG00000162490.7	DRAXIN	1:11722035:T:C	1.10122e-05	1.96666e-05	1.23626e-05	9.92819e-06	9.31719e-06	1:11722035:T:C-ENSG00000162490.7	0.580795	0.58078	0.580854	0.580898	0.580896	0.204958	0.226857	0.211898	0.171281	0.186172
ENSG00000159625.15	DRC7	16:57686493:C:G	1.88106e-10	2.67942e-09	6.6508e-10	3.16327e-09	1.0013e-08	16:57686493:C:G-ENSG00000159625.15	0.651632	0.651635	0.651648	0.65165	0.651649	0.132244	0.181048	0.162404	0.162975	0.178179
ENSG00000189269.12	DRICH1	22:23640588:C:T	1.81045e-06	1.2267e-06	1.36363e-06	1.39626e-06	1.57743e-06	22:23640588:C:T-ENSG00000189269.12	-0.680889	-0.680904	-0.680922	-0.680926	-0.680924	0.215127	0.189908	0.240798	0.209053	0.24662
ENSG00000113360.17	DROSHA	5:31541035:G:T	0.0510697	0.0498672	0.0470275	0.0487929	0.0480022	5:31541035:G:T-ENSG00000113360.17	-0.221916	-0.222669	-0.223717	-0.223046	-0.222878	0.164621	0.192248	0.136891	0.228578	0.198212
ENSG00000134755.18	DSC2	18:31058774:TCA:T	0.00142262	0.0019921	0.00247429	0.00251954	0.00272389	18:31058774:TCA:T-ENSG00000134755.18	-0.499949	-0.499637	-0.499561	-0.499534	-0.499433	0.215147	0.213609	0.238184	0.217093	0.275424
ENSG00000096696.15	DSP	6:7590420:A:G	0.0387082	0.0400746	0.0426028	0.0418462	0.0369334	6:7590420:A:G-ENSG00000096696.15	-0.293871	-0.293716	-0.293585	-0.293656	-0.294661	0.199827	0.222737	0.248438	0.212501	0.191465
ENSG00000125821.13	DTD1	20:18567767:T:G	0.000784346	0.000344211	0.00091684	0.000853407	0.000752944	20:18567767:T:G-ENSG00000125821.13	-0.483142	-0.483703	-0.483232	-0.483294	-0.483395	0.201388	0.189254	0.222867	0.180507	0.198687
ENSG00000197057.10	DTHD1	4:36310580:C:T	0.0157123	0.0144943	0.0165411	0.0154769	0.00733915	4:36310580:C:T-ENSG00000197057.10	0.356888	0.357887	0.357029	0.357695	0.360707	0.176428	0.199775	0.226495	0.290893	0.166685
ENSG00000091073.20	DTX2	7:76502953:C:A	0.00146914	0.00259234	0.00497781	0.00474612	0.00441178	7:76502953:C:A-ENSG00000091073.20	-0.226269	-0.225984	-0.224124	-0.223979	-0.22501	0.101358	0.110052	0.106314	0.0843522	0.131777
ENSG00000265479.7	DTX2P1-UPK3BP1-PMS2P11	7:77005686:A:T	0.0367367	0.0354961	0.029299	0.0325824	0.0322088	7:77005686:A:T-ENSG00000265479.7	-0.233143	-0.233844	-0.236155	-0.234617	-0.234452	0.193265	0.164208	0.141177	0.168577	0.158538
ENSG00000178498.16	DTX3	12:57567779:A:G	0.0759483	0.0889816	0.0478135	0.0706346	0.0694359	12:57567779:A:G-ENSG00000178498.16	0.141933	0.139105	0.15214	0.143777	0.143818	0.107088	0.10762	0.11106	0.160212	0.135976
ENSG00000169718.18	DUS1L	17:82114766:C:T	0.0105986	0.0225041	0.0290837	0.023543	0.0289283	17:82114766:C:T-ENSG00000169718.18	-0.308	-0.303068	-0.301218	-0.304092	-0.301326	0.151546	0.19691	0.178404	0.176584	0.188056
ENSG00000141994.16	DUS3L	19:5789554:T:C	1.39085e-08	2.31706e-10	1.7698e-11	3.31149e-09	3.80955e-11	19:5789554:T:C-ENSG00000141994.16	-0.450021	-0.450214	-0.45026	-0.450323	-0.450375	0.10876	0.117673	0.0810447	0.116098	0.096065
ENSG00000079393.21	DUSP13	10:75094806:C:T	0.00176277	0.00178306	0.00228568	0.00231918	0.00225394	10:75094806:C:T-ENSG00000079393.21	0.353498	0.353653	0.353656	0.353659	0.353704	0.143859	0.148447	0.170641	0.170551	0.189268
ENSG00000111266.9	DUSP16	12:12545442:C:CT	0.0423642	0.0469752	0.0532398	0.0533683	0.0489771	12:12545442:C:CT-ENSG00000111266.9	-0.185087	-0.183993	-0.183748	-0.18341	-0.184543	0.139464	0.128415	0.14589	0.126446	0.187288
ENSG00000167065.14	DUSP18	22:30664206:C:T	0.0287454	0.0379228	0.0403699	0.0414766	0.0435619	22:30664206:C:T-ENSG00000167065.14	0.334963	0.332077	0.332739	0.331884	0.331032	0.182308	0.246823	0.269297	0.220527	0.309289
ENSG00000158716.9	DUSP23	1:159767625:C:A	0.005129	0.00565949	0.00472388	0.00553852	0.00262618	1:159767625:C:A-ENSG00000158716.9	0.180267	0.180098	0.181488	0.179684	0.182311	0.100175	0.117435	0.0892815	0.0723492	0.0888764
ENSG00000128951.14	DUT	15:48303169:A:G	7.30253e-10	2.81997e-10	1.23601e-11	7.84004e-09	2.22447e-09	15:48303169:A:G-ENSG00000128951.14	0.496872	0.496852	0.49695	0.496929	0.496965	0.161379	0.102107	0.091458	0.1156	0.127173
ENSG00000259488.2	DUT-AS1	15:48283226:T:C	4.95646e-08	1.02705e-08	1.1267e-07	3.40639e-08	1.41814e-07	15:48283226:T:C-ENSG00000259488.2	0.689862	0.689872	0.689873	0.689882	0.68988	0.194426	0.155805	0.192879	0.191175	0.237852
ENSG00000225171.2	DUTP6	1:166857418:C:T	1.39799e-05	1.14723e-05	1.30506e-05	3.28846e-05	5.60147e-06	1:166857418:C:T-ENSG00000225171.2	0.593591	0.593634	0.59367	0.593646	0.593727	0.185399	0.205067	0.22373	0.223392	0.174526
ENSG00000107404.21	DVL1	1:1374505:A:G	0.310085	0.223237	0.0286251	0.398538	0.133272	1:1374505:A:G-ENSG00000107404.21	0.045844	-0.0711952	-0.205365	-0.0283232	0.201056	0.139902	0.124125	0.081131	0.10454	0.114444
ENSG00000161202.20	DVL3	3:184123972:G:C	0.074854	0.0694625	0.0210548	0.0584516	0.0504013	3:184123972:G:C-ENSG00000161202.20	0.238445	0.240469	0.271292	0.2432	0.248772	0.272143	0.170409	0.157539	0.136201	0.190838
ENSG00000144635.9	DYNC1LI1	3:32578857:C:T	0.0523297	0.0216307	0.0473733	0.0514866	0.0395104	3:32578857:C:T-ENSG00000144635.9	0.199465	0.211465	0.202264	0.200441	0.203982	0.176793	0.137548	0.131198	0.116057	0.136125
ENSG00000135720.13	DYNC1LI2	16:66712503:A:C	0.184529	0.0171185	0.159366	0.37159	0.149324	16:66712503:A:C-ENSG00000135720.13	0.168802	-0.445158	0.202609	-0.0687136	0.199359	0.191282	0.166408	0.214528	0.194014	0.161251
ENSG00000105204.14	DYRK1B	19:39865604:G:A	0.197626	0.00644241	0.226902	0.16745	0.197951	19:39865604:G:A-ENSG00000105204.14	0.116951	0.177965	0.110954	0.127039	0.116433	0.114026	0.079278	0.0894994	0.0773129	0.0889393
ENSG00000135636.16	DYSF	2:71472123:A:G	0.277106	0.22335	0.063319	0.0435222	0.107644	2:71472123:A:G-ENSG00000135636.16	-0.0528884	-0.0657821	-0.0975894	-0.101966	-0.0795702	0.0722239	0.083712	0.0880927	0.0690787	0.0793453
ENSG00000232125.5	DYTN	2:206752792:CT:C	0.00586364	0.00663864	0.00730777	0.00701541	0.00676403	2:206752792:CT:C-ENSG00000232125.5	0.475515	0.475286	0.47526	0.475427	0.475453	0.235205	0.247703	0.234316	0.278133	0.266601
ENSG00000158163.15	DZIP1L	3:138068350:T:C	0.0314724	0.0361422	0.035089	0.0382495	0.0403145	3:138068350:T:C-ENSG00000158163.15	0.208198	0.206968	0.208952	0.207134	0.206413	0.13351	0.143985	0.155679	0.141651	0.159818
ENSG00000144597.14	EAF1	3:15392086:A:T	0.0489788	0.0492191	0.0308219	0.0551324	0.0557904	3:15392086:A:T-ENSG00000144597.14	0.15539	0.15581	0.161884	0.154137	0.154167	0.128615	0.154076	0.0866561	0.104034	0.143928
ENSG00000129518.10	EAPP	14:34581380:G:T	0.000743097	0.000964938	0.000453481	0.000610637	0.000583748	14:34581380:G:T-ENSG00000129518.10	-0.259884	-0.259641	-0.260591	-0.260494	-0.260595	0.161238	0.163872	0.0756291	0.118522	0.124919
ENSG00000164330.17	EBF1	5:159064647:C:T	0.00723966	0.00796081	0.00914865	0.00846472	0.00732414	5:159064647:C:T-ENSG00000164330.17	0.267431	0.267356	0.267112	0.267478	0.267977	0.139756	0.170162	0.167636	0.12491	0.134754
ENSG00000281649.3	EBLN3P	9:37115199:C:T	0.00483979	0.00141716	0.000262063	0.000297001	0.000268735	9:37115199:C:T-ENSG00000281649.3	-0.213686	-0.216265	-0.219516	-0.218599	-0.219329	0.0943576	0.0944869	0.0808085	0.0750777	0.096232
ENSG00000093144.19	ECHDC1	6:127343516:G:A	0.0255409	0.0249432	0.0297091	0.0281191	0.0272361	6:127343516:G:A-ENSG00000093144.19	-0.259757	-0.260252	-0.259352	-0.259978	-0.259909	0.161581	0.183531	0.168476	0.183471	0.162296
ENSG00000127884.5	ECHS1	10:133419150:C:T	0.0432695	0.0623199	0.0328627	0.066961	0.0549837	10:133419150:C:T-ENSG00000127884.5	0.146068	0.140211	0.150477	0.13978	0.142792	0.125544	0.100339	0.0841555	0.11447	0.118473
ENSG00000088298.13	EDEM2	20:35161854:A:G	0.0466081	0.396028	0.464549	0.416172	0.475136	20:35161854:A:G-ENSG00000088298.13	-0.22229	-0.0994885	-0.0854372	-0.100926	-0.0804755	0.121832	0.215876	0.185869	0.188625	0.235045
ENSG00000116406.20	EDEM3	1:184773963:C:G	0.909568	0.0115224	0.886361	0.899707	0.90283	1:184773963:C:G-ENSG00000116406.20	0.00500302	-0.285974	0.00552613	0.00261983	-0.00184451	0.120063	0.0916727	0.099537	0.0762493	0.108334
ENSG00000124205.18	EDN3	20:59254246:T:C	0.016251	0.0158471	0.0182755	0.0167912	0.0175387	20:59254246:T:C-ENSG00000124205.18	0.347338	0.34761	0.347191	0.347802	0.347282	0.232472	0.188289	0.221641	0.193659	0.212457
ENSG00000156508.19	EEF1A1	6:73522167:T:G	0.109908	0.038821	0.0418347	0.168061	0.0495488	6:73522167:T:G-ENSG00000156508.19	0.118432	0.142295	0.151883	0.10335	0.135139	0.11003	0.0848921	0.113643	0.121292	0.0929505
ENSG00000250182.3	EEF1A1P13	5:14623408:G:A	0.0493756	0.0563991	0.0600377	0.0610298	0.0580667	5:14623408:G:A-ENSG00000250182.3	-0.390709	-0.388624	-0.388651	-0.387987	-0.388636	0.278117	0.335539	0.30576	0.310459	0.362194
ENSG00000268222.1	EEF1A1P7	19:35342503:C:G	0.828042	0.722397	0.820442	0.00104863	0.769665	19:35342503:C:G-ENSG00000268222.1	0.00305144	0.0512908	0.00592363	-0.536902	0.0283265	0.192599	0.20014	0.195901	0.12808	0.227838
ENSG00000114942.14	EEF1B2	2:206125655:T:A	0.0262161	0.0493995	0.0594451	0.0597656	0.0610658	2:206125655:T:A-ENSG00000114942.14	0.192771	0.186199	0.185667	0.185474	0.184788	0.122688	0.12341	0.146634	0.162595	0.12531
ENSG00000104529.19	EEF1D	8:143646271:G:A	0.531424	0.441439	0.557337	0.0334794	0.641555	8:143646271:G:A-ENSG00000104529.19	-0.0408319	-0.0690582	-0.0340947	-0.232065	-0.0105458	0.163005	0.155021	0.116915	0.090017	0.124537
ENSG00000213640.3	EEF1DP4	7:64832839:T:C	5.37192e-08	2.38028e-08	5.5034e-08	5.19723e-08	2.09732e-08	7:64832839:T:C-ENSG00000213640.3	0.680603	0.680613	0.680619	0.680624	0.680628	0.203312	0.186024	0.197383	0.192259	0.167428
ENSG00000132394.11	EEFSEC	3:128159573:G:A	0.0567741	0.0444232	0.058799	0.0655742	0.0516342	3:128159573:G:A-ENSG00000132394.11	-0.136475	-0.139706	-0.137821	-0.135916	-0.138956	0.0969614	0.0839093	0.112695	0.157001	0.14972
ENSG00000122547.11	EEPD1	7:36197918:A:T	0.0205902	0.0203996	0.0203429	0.0183623	0.00959909	7:36197918:A:T-ENSG00000122547.11	0.266867	0.267198	0.267134	0.268029	0.270042	0.223247	0.203974	0.200745	0.152081	0.111358
ENSG00000172771.12	EFCAB12	3:129387958:G:GT	0.00482731	0.00712958	0.00382606	0.00540838	0.00470405	3:129387958:G:GT-ENSG00000172771.12	0.329616	0.328466	0.331454	0.330006	0.330226	0.150269	0.15663	0.155689	0.248807	0.162215
ENSG00000178852.16	EFCAB13	17:47310917:A:G	0.000365616	0.00046299	0.000388194	0.000346041	0.000408423	17:47310917:A:G-ENSG00000178852.16	-0.7326	-0.732544	-0.732619	-0.732666	-0.732603	0.323597	0.319139	0.336281	0.280321	0.347639
ENSG00000159658.15	EFCAB14	1:46677875:A:G	0.0148065	0.0235574	0.0304863	0.0236708	0.0325575	1:46677875:A:G-ENSG00000159658.15	0.176449	0.173929	0.172813	0.175686	0.172411	0.0916205	0.110458	0.11118	0.105083	0.136998
ENSG00000203666.13	EFCAB2	1:244970360:G:C	0.0302122	0.035564	0.0234232	0.026612	0.0340961	1:244970360:G:C-ENSG00000203666.13	-0.151452	-0.150304	-0.155381	-0.154141	-0.151471	0.0847542	0.0974187	0.0928624	0.134387	0.178821
ENSG00000172638.13	EFEMP2	11:65868088:G:A	0.00664973	0.00857268	0.000238563	0.0103065	0.00510779	11:65868088:G:A-ENSG00000172638.13	-0.305489	-0.305543	-0.3157	-0.305303	-0.308727	0.108975	0.154455	0.110758	0.153742	0.123164
ENSG00000142634.13	EFHD2	1:15432723:CA:C	0.0314263	0.033706	0.0368795	0.0364451	0.0223466	1:15432723:CA:C-ENSG00000142634.13	-0.126646	-0.126143	-0.126054	-0.126458	-0.129653	0.072195	0.0768377	0.086053	0.105992	0.0914979
ENSG00000132294.15	EFR3A	8:131891023:G:A	0.287244	0.0295095	0.288768	0.272946	0.281328	8:131891023:G:A-ENSG00000132294.15	0.080623	0.141701	0.0822365	0.0844246	0.0819012	0.100497	0.075188	0.130033	0.0717263	0.101479
ENSG00000108883.13	EFTUD2	17:44850260:A:G	0.00165112	0.00452603	0.00341806	0.00318536	0.0046223	17:44850260:A:G-ENSG00000108883.13	0.249689	0.247626	0.249072	0.250235	0.248047	0.103054	0.12415	0.112657	0.156793	0.109767
ENSG00000120738.8	EGR1	5:138418491:T:A	0.0212882	0.0303519	0.0345981	0.0331969	0.0335499	5:138418491:T:A-ENSG00000120738.8	0.26162	0.259113	0.258841	0.25934	0.259102	0.145648	0.180468	0.171658	0.174234	0.187868
ENSG00000013016.16	EHD3	2:31274118:A:G	0.0285196	0.0300694	0.0306509	0.0294003	0.0219114	2:31274118:A:G-ENSG00000013016.16	0.274884	0.274618	0.274625	0.275067	0.276788	0.196951	0.221234	0.187515	0.180412	0.145553
ENSG00000181090.21	EHMT1	9:137627373:T:C	0.00791468	0.271567	0.397314	0.332757	0.361483	9:137627373:T:C-ENSG00000181090.21	0.361654	0.165586	0.114921	0.138716	0.128059	0.160296	0.132994	0.127367	0.161473	0.176009
ENSG00000280739.5	EIF1B-AS1	3:40301252:G:C	0.00408786	0.00391838	0.00394212	0.00378436	0.00115976	3:40301252:G:C-ENSG00000280739.5	0.272532	0.272963	0.272888	0.273422	0.274956	0.143762	0.13693	0.110932	0.122125	0.115757
ENSG00000143486.16	EIF2D	1:206658649:C:T	0.0525107	0.0277174	0.0699736	0.0560107	0.0619834	1:206658649:C:T-ENSG00000143486.16	0.34523	0.359015	0.339354	0.345401	0.341789	0.250394	0.198615	0.272904	0.252408	0.29582
ENSG00000236493.2	EIF2S2P3	10:92686284:G:A	0.00196641	0.00209677	0.0019163	0.00150572	0.00158764	10:92686284:G:A-ENSG00000236493.2	-0.328679	-0.328899	-0.329247	-0.330105	-0.329869	0.128482	0.173329	0.150049	0.138305	0.182888
ENSG00000180574.4	EIF2S3B	12:10487076:T:A	0.000612687	0.000569117	0.000729455	0.000698247	0.000585011	12:10487076:T:A-ENSG00000180574.4	0.693299	0.693344	0.693286	0.693314	0.693377	0.316516	0.254309	0.320416	0.343856	0.353735
ENSG00000107581.13	EIF3A	10:119129510:T:C	0.0717459	0.0702944	0.0282106	0.0402387	0.0341989	10:119129510:T:C-ENSG00000107581.13	0.0991731	0.100349	0.107858	0.104861	0.106315	0.0945193	0.0847495	0.0511549	0.102776	0.10152
ENSG00000100353.18	EIF3D	22:36521463:T:C	0.031882	0.0321712	0.0322478	0.0328213	0.0209101	22:36521463:T:C-ENSG00000100353.18	0.245061	0.245055	0.245404	0.245175	0.248273	0.194568	0.145312	0.156901	0.179414	0.147971
ENSG00000104408.11	EIF3E	8:108488802:A:G	0.0588457	0.0314763	0.0473485	0.0461913	0.0577447	8:108488802:A:G-ENSG00000104408.11	-0.136349	-0.14441	-0.140349	-0.140663	-0.136891	0.114044	0.0961444	0.0935244	0.101056	0.100238
ENSG00000175390.15	EIF3F	11:7992932:C:T	0.00068708	0.00120071	0.000559919	0.00048162	0.000638341	11:7992932:C:T-ENSG00000175390.15	-0.26329	-0.262584	-0.264427	-0.264877	-0.264084	0.110199	0.114363	0.109385	0.105454	0.113861
ENSG00000233426.3	EIF3FP3	2:58255633:G:A	0.0139191	0.0161216	0.0116834	0.013573	0.0141932	2:58255633:G:A-ENSG00000233426.3	0.346536	0.345766	0.348506	0.347014	0.346621	0.19805	0.214817	0.188871	0.200362	0.192015
ENSG00000130811.12	EIF3G	19:10148119:C:CA	0.00314074	0.00313338	0.0031563	0.0029002	0.00185722	19:10148119:C:CA-ENSG00000130811.12	0.280754	0.280989	0.280934	0.281657	0.282143	0.147203	0.14992	0.117393	0.136436	0.120511
ENSG00000084623.12	EIF3I	1:32210325:T:TA	0.13977	0.0205636	0.143735	0.188561	0.139828	1:32210325:T:TA-ENSG00000084623.12	-0.189428	-0.238998	-0.190991	-0.174738	-0.189926	0.15342	0.121015	0.164702	0.179925	0.163986
ENSG00000179523.7	EIF3J-DT	15:44527315:A:T	0.0181187	0.618472	0.609492	0.587652	0.696705	15:44527315:A:T-ENSG00000179523.7	0.398276	-0.0582983	-0.0569392	-0.0634875	-0.015394	0.149515	0.203268	0.223324	0.187485	0.20624
ENSG00000178982.10	EIF3K	19:38590744:G:A	0.0257483	0.026654	0.0231689	0.0199322	0.0267898	19:38590744:G:A-ENSG00000178982.10	0.253219	0.253057	0.254201	0.255576	0.252838	0.233468	0.198212	0.134352	0.132716	0.196578
ENSG00000100129.18	EIF3L	22:37865584:T:A	0.00819965	0.00781267	0.00665149	0.00435074	0.00745164	22:37865584:T:A-ENSG00000100129.18	0.26691	0.267473	0.268065	0.270121	0.267765	0.149369	0.163318	0.116713	0.128091	0.151344
ENSG00000141543.12	EIF4A3	17:80127177:G:A	0.0328372	0.0379516	0.0271713	0.0329773	0.0322371	17:80127177:G:A-ENSG00000141543.12	0.194539	0.19307	0.197963	0.194582	0.194878	0.13863	0.146997	0.143502	0.119644	0.127074
ENSG00000075151.24	EIF4G3	1:21152339:C:CAAAAAAAA	0.0101392	0.0178494	0.0208956	0.0186249	0.0203771	1:21152339:C:CAAAAAAAA-ENSG00000075151.24	0.167147	0.164744	0.164534	0.165791	0.164744	0.0967243	0.0939963	0.102297	0.0945284	0.0949819
ENSG00000163577.8	EIF5A2	3:170869805:C:A	0.0127049	0.0099485	0.00985267	0.00960721	0.00178705	3:170869805:C:A-ENSG00000163577.8	-0.399833	-0.401375	-0.401254	-0.401696	-0.406511	0.243283	0.210383	0.167113	0.200326	0.162771
ENSG00000242372.9	EIF6	20:35278049:G:A	9.58863e-07	4.54983e-09	3.05408e-05	2.80867e-07	7.3508e-05	20:35278049:G:A-ENSG00000242372.9	0.538399	0.538511	0.538359	0.538514	0.538367	0.158639	0.112874	0.155417	0.13053	0.183921
ENSG00000006744.19	ELAC2	17:12987021:CTT:C	2.47929e-05	6.76424e-08	4.90443e-05	1.67071e-05	1.84416e-05	17:12987021:CTT:C-ENSG00000006744.19	-0.36033	-0.361193	-0.360361	-0.361141	-0.36094	0.118216	0.0791854	0.100535	0.125287	0.109183
ENSG00000197561.7	ELANE	19:898222:TA:T	0.041668	0.0450344	0.039788	0.0402563	0.0304553	19:898222:TA:T-ENSG00000197561.7	-0.459787	-0.458702	-0.460573	-0.460071	-0.463798	0.408787	0.305372	0.353751	0.373406	0.294462
ENSG00000116299.17	ELAPOR1	1:109090755:C:G	0.00442207	0.00390775	0.00440331	0.00448782	0.00416002	1:109090755:C:G-ENSG00000116299.17	-0.459815	-0.460156	-0.460146	-0.460075	-0.460153	0.254057	0.206491	0.237915	0.236303	0.221712
ENSG00000109381.21	ELF2	4:139132845:CATATAT:C	0.0093758	0.0082181	0.00568927	0.0092788	0.00728221	4:139132845:CATATAT:C-ENSG00000109381.21	0.170839	0.171581	0.173524	0.170673	0.172294	0.132026	0.103677	0.0777357	0.077647	0.101513
ENSG00000105656.13	ELL	19:18493275:C:G	7.82883e-06	6.34671e-06	8.51824e-06	8.4883e-06	9.73792e-06	19:18493275:C:G-ENSG00000105656.13	0.272949	0.273167	0.273213	0.273187	0.272964	0.110825	0.0910381	0.0905676	0.0835336	0.0816186
ENSG00000155849.16	ELMO1	7:37413014:C:G	7.08079e-05	3.1184e-05	2.4041e-05	2.1562e-05	3.19177e-05	7:37413014:C:G-ENSG00000155849.16	0.254932	0.25565	0.256745	0.256693	0.25592	0.0982051	0.0865539	0.101287	0.0837394	0.0837334
ENSG00000102890.16	ELMO3	16:67203441:A:G	0.0038476	0.00398117	0.00572099	0.00492388	0.00141675	16:67203441:A:G-ENSG00000102890.16	0.328926	0.329243	0.327767	0.328551	0.331523	0.151112	0.179009	0.12872	0.153804	0.147148
ENSG00000011007.13	ELOA	1:23787639:G:A	8.03867e-07	1.67887e-06	1.12289e-07	7.65197e-07	6.59562e-07	1:23787639:G:A-ENSG00000011007.13	0.43518	0.435179	0.435664	0.435586	0.43554	0.125599	0.121517	0.104187	0.156034	0.12833
ENSG00000130165.11	ELOF1	19:11565871:C:CT	0.67518	0.702305	0.743476	0.750826	0.017051	19:11565871:C:CT-ENSG00000130165.11	-0.0358832	-0.0358431	-0.0191797	-0.0197417	-0.251998	0.147672	0.163221	0.131273	0.156442	0.102158
ENSG00000012660.14	ELOVL5	6:53346822:G:A	0.0710127	0.0349461	0.061404	0.0574465	0.0381883	6:53346822:G:A-ENSG00000012660.14	0.203941	0.218325	0.208432	0.20974	0.213999	0.17626	0.144129	0.172674	0.162605	0.126963
ENSG00000134759.14	ELP2	18:36127921:T:C	7.71666e-05	0.00200783	0.00187873	0.00166176	0.00167088	18:36127921:T:C-ENSG00000134759.14	0.430399	0.428212	0.428487	0.429103	0.429056	0.142408	0.145982	0.145279	0.211767	0.201811
ENSG00000134014.18	ELP3	8:28112152:T:A	0.0199669	0.0285288	0.0321007	0.0334981	0.0302422	8:28112152:T:A-ENSG00000134014.18	0.331269	0.328068	0.327858	0.327311	0.328404	0.204506	0.191737	0.187664	0.265732	0.230542
ENSG00000230424.3	EMC1-AS1	1:19233469:A:G	0.0117868	0.0150634	0.0158715	0.015963	0.0162342	1:19233469:A:G-ENSG00000230424.3	0.359276	0.358247	0.358543	0.358443	0.358211	0.193811	0.250848	0.207455	0.222736	0.183379
ENSG00000131148.9	EMC8	16:85779625:A:C	0.000530637	0.000874111	0.000923077	0.000830704	0.00101539	16:85779625:A:C-ENSG00000131148.9	-0.437952	-0.437731	-0.437894	-0.438029	-0.437827	0.164662	0.212203	0.230227	0.157649	0.191284
ENSG00000100908.14	EMC9	14:24140146:AATATAT:A	0.00690657	0.00742082	0.00631024	0.00504122	0.00676588	14:24140146:AATATAT:A-ENSG00000100908.14	-0.258095	-0.257741	-0.25879	-0.259742	-0.258447	0.177775	0.128093	0.135667	0.114944	0.144982
ENSG00000197774.14	EME2	16:1780436:G:A	2.64466e-05	0.000272038	0.000279854	0.00104941	0.000426613	16:1780436:G:A-ENSG00000197774.14	-0.362424	-0.359753	-0.359828	-0.357654	-0.359207	0.151344	0.143982	0.134418	0.0973293	0.134322
ENSG00000267757.4	EML2-AS1	19:45641767:G:T	2.0607e-09	9.89227e-08	1.24271e-11	3.45443e-11	1.34005e-10	19:45641767:G:T-ENSG00000267757.4	-0.631206	-0.631202	-0.631242	-0.631246	-0.631247	0.149506	0.154969	0.134421	0.129612	0.143751
ENSG00000149499.12	EML3	11:62610749:A:G	7.32106e-09	1.98026e-09	3.79799e-10	3.11445e-09	1.80253e-08	11:62610749:A:G-ENSG00000149499.12	0.398925	0.398996	0.399233	0.39909	0.399112	0.117016	0.101574	0.0890121	0.0846188	0.0969603
ENSG00000143924.19	EML4	2:42200069:G:A	0.000462233	0.000456457	0.000398249	0.000535927	0.000480437	2:42200069:G:A-ENSG00000143924.19	0.45269	0.452719	0.452989	0.452834	0.452929	0.254664	0.173445	0.137752	0.209231	0.271972
ENSG00000255135.5	EMSY-DT	11:76467979:CA:C	0.268498	0.0266934	0.169514	0.0741926	0.494691	11:76467979:CA:C-ENSG00000255135.5	-0.119354	-0.489666	-0.168922	0.342243	0.0121396	0.259077	0.207666	0.208204	0.20314	0.257717
ENSG00000171617.15	ENC1	5:74650661:C:G	4.53046e-06	4.70409e-06	4.17179e-06	4.50889e-06	3.78594e-06	5:74650661:C:G-ENSG00000171617.15	0.840875	0.840876	0.840883	0.840883	0.840885	0.332705	0.30075	0.269293	0.296314	0.265224
ENSG00000149218.5	ENDOD1	11:95132290:T:G	0.0183532	0.0182526	0.0185233	0.0176563	0.0137039	11:95132290:T:G-ENSG00000149218.5	-0.25933	-0.259467	-0.259602	-0.260082	-0.260811	0.221852	0.151274	0.173402	0.187161	0.120759
ENSG00000167136.7	ENDOG	9:128809748:G:A	1.16976e-07	1.79927e-08	6.71454e-08	8.68776e-10	5.77305e-08	9:128809748:G:A-ENSG00000167136.7	0.516553	0.516601	0.516626	0.516726	0.516691	0.169024	0.146832	0.131182	0.0954876	0.160863
ENSG00000106991.14	ENG	9:127867303:A:G	0.000841373	0.00100659	0.0010971	0.000960313	0.00102229	9:127867303:A:G-ENSG00000106991.14	-0.645804	-0.645712	-0.645714	-0.645831	-0.645764	0.30936	0.295068	0.277843	0.272748	0.315124
ENSG00000167280.17	ENGASE	17:79083494:A:G	3.71946e-08	1.75109e-08	3.3986e-11	2.06202e-12	4.5123e-11	17:79083494:A:G-ENSG00000167280.17	-0.816537	-0.816538	-0.81654	-0.816542	-0.816541	0.226696	0.196156	0.161726	0.163712	0.190773
ENSG00000001561.7	ENPP4	6:46160532:A:G	0.00377725	0.00775221	0.0070054	0.0206164	0.000204883	6:46160532:A:G-ENSG00000001561.7	0.271412	0.265162	0.26601	0.260987	0.277232	0.101	0.113147	0.110187	0.113196	0.0958275
ENSG00000256589.2	ENPP7P5	12:8350355:A:G	2.61897e-06	8.89294e-06	8.94567e-06	5.77501e-06	8.41152e-06	12:8350355:A:G-ENSG00000256589.2	0.555345	0.555315	0.555368	0.555441	0.555402	0.145487	0.19061	0.186824	0.201316	0.194839
ENSG00000100101.15	ENSG00000100101	22:37726455:A:G	0.000119487	0.000150363	0.00010112	0.000151107	0.000146025	22:37726455:A:G-ENSG00000100101.15	0.387782	0.387769	0.388279	0.388007	0.388003	0.149519	0.172302	0.127676	0.146174	0.138369
ENSG00000111788.10	ENSG00000111788	12:9261011:A:G	2.49639e-05	1.33466e-05	1.85395e-05	1.97977e-05	1.72551e-05	12:9261011:A:G-ENSG00000111788.10	-0.604785	-0.604857	-0.604868	-0.604879	-0.604892	0.206126	0.196473	0.201549	0.211991	0.238405
ENSG00000170846.17	ENSG00000170846	4:6675703:A:G	1.89194e-05	2.35334e-05	1.90715e-05	1.00755e-05	3.38365e-05	4:6675703:A:G-ENSG00000170846.17	0.48313	0.483154	0.483314	0.48349	0.483336	0.156328	0.164864	0.170397	0.136648	0.225541
ENSG00000174171.7	ENSG00000174171	15:41849305:T:C	0.00354349	0.00264525	0.00465346	0.00402422	0.00426542	15:41849305:T:C-ENSG00000174171.7	-0.569732	-0.570386	-0.569395	-0.569747	-0.569545	0.260558	0.235436	0.300439	0.313165	0.378599
ENSG00000176593.8	ENSG00000176593	19:58011193:C:G	0.0466358	0.0471849	0.0460561	0.0418389	0.0425596	19:58011193:C:G-ENSG00000176593.8	-0.2143	-0.214419	-0.214905	-0.216145	-0.215448	0.168718	0.150301	0.17472	0.163424	0.159771
ENSG00000188897.10	ENSG00000188897	16:11538780:T:C	0.000499668	0.000582182	0.000425117	0.000516692	0.000467004	16:11538780:T:C-ENSG00000188897.10	-0.450801	-0.450807	-0.451231	-0.451071	-0.451151	0.171056	0.221809	0.160374	0.192745	0.201418
ENSG00000198106.8	ENSG00000198106	16:29331179:T:A	0.00802174	0.0196326	0.0191314	0.0183019	0.0178427	16:29331179:T:A-ENSG00000198106.8	-0.358297	-0.353645	-0.354196	-0.354902	-0.3553	0.163005	0.260067	0.158778	0.242686	0.273575
ENSG00000204745.4	ENSG00000204745	2:87075937:C:G	0.00353617	0.00344829	0.00425828	0.00366786	0.00195029	2:87075937:C:G-ENSG00000204745.4	0.433311	0.433592	0.433156	0.433603	0.434455	0.206441	0.244684	0.201278	0.224525	0.168452
ENSG00000204850.4	ENSG00000204850	19:46526977:T:C	0.0394725	0.0391797	0.0374098	0.0336262	0.0329336	19:46526977:T:C-ENSG00000204850.4	-0.339564	-0.339959	-0.340294	-0.341731	-0.34138	0.249791	0.235409	0.22587	0.231561	0.258982
ENSG00000205018.2	ENSG00000205018	16:88967660:G:A	0.493356	0.00109714	0.555445	0.520858	0.506026	16:88967660:G:A-ENSG00000205018.2	-0.0763089	-0.540492	0.0349869	-0.0665687	0.0761381	0.209075	0.143426	0.158733	0.227195	0.242924
ENSG00000205959.4	ENSG00000205959	4:8447506:A:G	0.114896	0.00105768	0.155411	0.0785005	0.0518131	4:8447506:A:G-ENSG00000205959.4	-0.267642	-0.346862	-0.254382	-0.284349	-0.299201	0.168057	0.117462	0.196696	0.159286	0.145969
ENSG00000213557.4	ENSG00000213557	9:108049333:C:T	0.0673428	0.074855	0.0743441	0.0750607	0.0489158	9:108049333:C:T-ENSG00000213557.4	0.217714	0.216034	0.216733	0.216351	0.223214	0.148404	0.179426	0.212075	0.214243	0.171606
ENSG00000214708.4	ENSG00000214708	17:32160922:G:A	0.110232	0.103488	0.111239	0.114477	0.0393195	17:32160922:G:A-ENSG00000214708.4	-0.194442	-0.197668	-0.194941	-0.193771	-0.217523	0.156313	0.162543	0.188572	0.170272	0.152249
ENSG00000217702.3	ENSG00000217702	2:74107663:A:G	3.76031e-05	5.21975e-05	5.97925e-05	5.9572e-05	6.07663e-05	2:74107663:A:G-ENSG00000217702.3	0.678739	0.678728	0.678742	0.678751	0.678747	0.23444	0.250889	0.267428	0.266166	0.25256
ENSG00000218713.1	ENSG00000218713	6:53210311:T:C	0.0147791	0.0149387	0.0150215	0.00964173	0.0134948	6:53210311:T:C-ENSG00000218713.1	0.305108	0.305133	0.305169	0.307878	0.305843	0.228046	0.172741	0.185267	0.136849	0.187705
ENSG00000223711.2	ENSG00000223711	3:195530358:C:G	0.675536	0.640805	0.608763	0.726988	0.00276808	3:195530358:C:G-ENSG00000223711.2	-0.0423817	-0.0466907	-0.0713702	0.0195253	0.527422	0.173472	0.201854	0.19856	0.214015	0.143485
ENSG00000223725.6	ENSG00000223725	2:207480416:T:C	0.000126932	0.000141361	0.000156576	0.000218599	0.000129479	2:207480416:T:C-ENSG00000223725.6	0.43496	0.435023	0.435107	0.435066	0.435238	0.152424	0.185988	0.151358	0.205461	0.151318
ENSG00000224376.3	ENSG00000224376	2:231409133:G:A	0.010042	0.011119	0.0102451	0.00955644	0.00162677	2:231409133:G:A-ENSG00000224376.3	0.532288	0.531888	0.532307	0.532863	0.538558	0.267381	0.282174	0.253593	0.291489	0.211112
ENSG00000224479.6	ENSG00000224479	3:63784462:A:G	0.000104747	6.55694e-05	7.52423e-05	7.73729e-05	0.000102157	3:63784462:A:G-ENSG00000224479.6	0.600935	0.601028	0.601056	0.601063	0.601017	0.254334	0.214734	0.212005	0.227685	0.225341
ENSG00000224635.2	ENSG00000224635	20:38437628:CA:C	1.50476e-10	8.7677e-09	5.54041e-09	8.4573e-08	8.81528e-08	20:38437628:CA:C-ENSG00000224635.2	0.67783	0.677827	0.677835	0.677833	0.677836	0.144178	0.176255	0.169501	0.156635	0.202579
ENSG00000224789.1	ENSG00000224789	2:120207873:G:C	0.00013346	2.52465e-05	0.00223638	0.0026438	0.000194216	2:120207873:G:C-ENSG00000224789.1	0.289097	0.290299	0.287801	0.287803	0.289784	0.0845908	0.0869751	0.131211	0.132305	0.105407
ENSG00000225032.5	ENSG00000225032	9:127798788:C:T	0.490323	0.0210437	0.490693	0.409814	0.477966	9:127798788:C:T-ENSG00000225032.5	-0.0791144	-0.280012	-0.0812777	-0.108675	-0.0805258	0.149394	0.124224	0.1797	0.135064	0.22761
ENSG00000225335.3	ENSG00000225335	22:18084291:C:T	0.646894	0.653668	0.620192	0.0132423	0.716313	22:18084291:C:T-ENSG00000225335.3	0.0476225	-0.0434669	0.0682013	-0.501516	0.0201335	0.184682	0.207286	0.206042	0.149336	0.206524
ENSG00000225450.1	ENSG00000225450	22:38787878:C:A	0.0540875	0.0334128	0.0638402	0.0601573	0.0620658	22:38787878:C:A-ENSG00000225450.1	-0.206004	-0.21261	-0.205263	-0.206484	-0.205153	0.124194	0.128737	0.199401	0.211435	0.197315
ENSG00000225612.2	ENSG00000225612	7:155255079:T:G	0.0332006	0.0201921	0.0316402	0.0289497	0.0399992	7:155255079:T:G-ENSG00000225612.2	0.319114	0.325435	0.320691	0.322078	0.316576	0.228723	0.170296	0.215757	0.198397	0.240058
ENSG00000225850.4	ENSG00000225850	10:97366031:G:C	0.047493	0.0399578	0.0656005	0.0648175	0.0634635	10:97366031:G:C-ENSG00000225850.4	0.220895	0.222816	0.217324	0.217392	0.217384	0.192802	0.14048	0.159608	0.16708	0.190352
ENSG00000226471.7	ENSG00000226471	22:28792053:A:T	0.676697	0.607583	0.678922	0.0433925	0.638413	22:28792053:A:T-ENSG00000226471.7	-0.0325131	-0.0565454	-0.030705	-0.394734	-0.0434298	0.157895	0.162793	0.173169	0.154028	0.173265
ENSG00000226816.3	ENSG00000226816	7:23189419:A:AC	2.83917e-09	1.58022e-08	2.1869e-09	2.6852e-10	3.59701e-09	7:23189419:A:AC-ENSG00000226816.3	1.02087	1.02087	1.02087	1.02087	1.02087	0.264822	0.312763	0.254152	0.219019	0.2915
ENSG00000227242.4	ENSG00000227242	1:147094474:T:TA	3.25414e-06	1.77606e-06	1.01214e-06	8.29407e-07	8.31293e-07	1:147094474:T:TA-ENSG00000227242.4	0.468901	0.469001	0.46919	0.469303	0.469261	0.152158	0.147489	0.13899	0.13242	0.137357
ENSG00000227355.5	ENSG00000227355	9:121328506:G:A	2.16579e-05	8.13778e-05	0.000153484	0.000132517	0.000202873	9:121328506:G:A-ENSG00000227355.5	0.494704	0.494646	0.494592	0.494656	0.494579	0.140215	0.173886	0.202167	0.190155	0.18836
ENSG00000227598.1	ENSG00000227598	6:166983141:A:G	4.01026e-11	1.10023e-13	2.33147e-15	6.24908e-11	1.11409e-07	6:166983141:A:G-ENSG00000227598.1	-0.504439	-0.504465	-0.504557	-0.504494	-0.504483	0.10741	0.0841887	0.0865333	0.087244	0.122549
ENSG00000227757.3	ENSG00000227757	21:33026408:C:T	0.0703278	0.0511631	0.0618847	0.0633178	0.0473443	21:33026408:C:T-ENSG00000227757.3	0.199446	0.206098	0.202999	0.202277	0.205305	0.167166	0.153274	0.189041	0.202444	0.130571
ENSG00000227920.3	ENSG00000227920	6:37516939:A:C	0.000525415	0.000469786	0.000306639	0.000374905	0.000312025	6:37516939:A:C-ENSG00000227920.3	-0.448041	-0.448226	-0.448785	-0.448619	-0.448744	0.165928	0.183173	0.16317	0.19693	0.199977
ENSG00000228010.6	ENSG00000228010	7:6700158:A:G	0.00920035	0.00326795	0.00848267	0.00839737	0.00808332	7:6700158:A:G-ENSG00000228010.6	-0.416308	-0.420004	-0.41708	-0.417202	-0.41708	0.218656	0.188015	0.208501	0.220591	0.196921
ENSG00000228334.3	ENSG00000228334	7:3091073:G:C	7.66952e-15	8.08609e-14	9.16617e-12	1.45173e-12	2.05597e-11	7:3091073:G:C-ENSG00000228334.3	0.735009	0.735009	0.735011	0.735012	0.735012	0.131176	0.139104	0.142609	0.154193	0.1522
ENSG00000228863.8	ENSG00000228863	1:160621560:CAA:C	0.000449337	0.00784729	0.00796516	0.00789223	0.00850939	1:160621560:CAA:C-ENSG00000228863.8	-0.341852	-0.338571	-0.338662	-0.338988	-0.338621	0.115146	0.18384	0.131863	0.15522	0.167537
ENSG00000229337.2	ENSG00000229337	2:177228504:CA:C	1.8721e-05	1.76512e-05	1.59128e-05	1.83852e-05	1.09079e-05	2:177228504:CA:C-ENSG00000229337.2	-0.648591	-0.648614	-0.648652	-0.648652	-0.64868	0.202633	0.241921	0.230526	0.247322	0.219758
ENSG00000230107.1	ENSG00000230107	22:42470071:G:C	2.1933e-05	1.57203e-05	2.03368e-05	2.15583e-05	1.79249e-05	22:42470071:G:C-ENSG00000230107.1	0.544317	0.544397	0.544417	0.54444	0.544461	0.203906	0.181673	0.17356	0.192879	0.188011
ENSG00000230305.2	ENSG00000230305	7:76482743:C:T	8.96097e-05	0.000127379	4.62497e-05	6.69188e-05	6.70506e-05	7:76482743:C:T-ENSG00000230305.2	-0.522172	-0.522138	-0.522511	-0.522396	-0.522423	0.20164	0.176048	0.177896	0.180503	0.224333
ENSG00000230615.8	ENSG00000230615	1:44049211:G:C	9.35004e-05	3.08368e-05	2.36909e-05	3.93781e-05	5.8399e-06	1:44049211:G:C-ENSG00000230615.8	0.40655	0.406825	0.407191	0.407049	0.407324	0.182401	0.14561	0.140384	0.147869	0.101963
ENSG00000231412.3	ENSG00000231412	19:43325691:A:G	0.000556137	0.0005687	0.000581359	0.000554448	0.000412839	19:43325691:A:G-ENSG00000231412.3	0.542668	0.542695	0.542766	0.542825	0.542934	0.230438	0.218832	0.240834	0.224582	0.221416
ENSG00000231769.4	ENSG00000231769	6:46144635:T:C	6.12352e-08	4.60515e-07	1.41569e-07	4.82177e-08	3.33784e-08	6:46144635:T:C-ENSG00000231769.4	0.493383	0.493381	0.493482	0.493561	0.493578	0.135113	0.163442	0.141909	0.120327	0.125108
ENSG00000231970.1	ENSG00000231970	10:97400395:A:G	3.95212e-19	2.93486e-14	5.34007e-18	1.8139e-15	1.15688e-12	10:97400395:A:G-ENSG00000231970.1	0.943835	0.943835	0.943835	0.943835	0.943835	0.154125	0.160577	0.143124	0.150535	0.173666
ENSG00000232063.2	ENSG00000232063	9:94305505:G:A	0.000515148	0.000636304	0.000515691	0.000547618	0.000619585	9:94305505:G:A-ENSG00000232063.2	0.681343	0.681289	0.681427	0.681386	0.681333	0.259617	0.502085	0.268348	0.308638	0.320473
ENSG00000232208.2	ENSG00000232208	1:8907804:A:G	0.000244027	0.000352284	0.000214438	0.000373469	0.00037657	1:8907804:A:G-ENSG00000232208.2	0.351039	0.351017	0.351776	0.351305	0.351352	0.116025	0.171197	0.119842	0.150859	0.161756
ENSG00000232680.2	ENSG00000232680	19:35432476:T:C	0.0465871	0.0763039	0.0741582	0.0710682	0.075471	19:35432476:T:C-ENSG00000232680.2	0.201645	0.193686	0.195572	0.196392	0.195205	0.136319	0.155415	0.176987	0.177194	0.167587
ENSG00000232807.2	ENSG00000232807	10:5959422:A:G	0.0870598	0.1505	0.279375	0.237548	0.0380242	10:5959422:A:G-ENSG00000232807.2	0.21439	0.177094	0.125936	0.145117	0.267246	0.174289	0.144828	0.174179	0.181025	0.173484
ENSG00000232811.1	ENSG00000232811	1:110895794:T:C	0.385789	0.335618	0.00039969	0.395373	0.0530271	1:110895794:T:C-ENSG00000232811.1	0.107661	0.126093	0.4931	0.104794	0.342882	0.191746	0.185071	0.130541	0.173781	0.181756
ENSG00000232855.7	ENSG00000232855	21:28700681:G:A	0.00210092	0.00138656	0.00231957	0.00253707	0.00264859	21:28700681:G:A-ENSG00000232855.7	0.400184	0.400614	0.400469	0.400285	0.400155	0.238036	0.133633	0.219129	0.205883	0.191226
ENSG00000232934.8	ENSG00000232934	10:112416470:C:CA	0.00336282	0.00342652	0.0029905	0.0034348	0.00324729	10:112416470:C:CA-ENSG00000232934.8	0.393427	0.393525	0.394099	0.393709	0.393801	0.203097	0.215608	0.161679	0.188215	0.191335
ENSG00000233223.5	ENSG00000233223	17:7582265:C:T	0.00283785	0.00350791	0.00393184	0.00386395	0.00355187	17:7582265:C:T-ENSG00000233223.5	0.48286	0.482624	0.482618	0.482675	0.482789	0.216296	0.266229	0.247304	0.243211	0.214718
ENSG00000233547.1	ENSG00000233547	10:112992651:C:T	0.703075	0.587598	0.605081	0.0389251	0.709202	10:112992651:C:T-ENSG00000233547.1	0.0276431	0.0871184	0.076011	0.577194	0.0185388	0.29485	0.370814	0.366003	0.243844	0.348304
ENSG00000233755.1	ENSG00000233755	1:25064336:C:T	0.00230212	0.00338403	0.00237952	0.00208128	0.00301653	1:25064336:C:T-ENSG00000233755.1	0.372063	0.371532	0.372439	0.372775	0.372045	0.163889	0.221133	0.172326	0.143789	0.202527
ENSG00000233875.1	ENSG00000233875	1:154576994:T:C	0.00552621	0.00482793	0.00747364	0.00787824	0.0049606	1:154576994:T:C-ENSG00000233875.1	0.463526	0.464119	0.46284	0.462694	0.464174	0.243255	0.205269	0.248615	0.28544	0.222344
ENSG00000233968.9	ENSG00000233968	10:19774985:T:A	0.0150578	0.0419554	0.0657924	0.0542147	0.0556872	10:19774985:T:A-ENSG00000233968.9	0.314196	0.301052	0.291775	0.296261	0.295206	0.173792	0.222506	0.225915	0.195108	0.163552
ENSG00000234286.3	ENSG00000234286	7:23679703:G:A	4.23647e-10	1.7143e-10	3.20588e-11	1.94722e-08	3.66718e-07	7:23679703:G:A-ENSG00000234286.3	0.641623	0.641626	0.641645	0.641641	0.641636	0.14835	0.127791	0.137599	0.167063	0.186513
ENSG00000234396.3	ENSG00000234396	1:2252315:C:G	0.320579	0.0211013	0.196409	0.476868	0.300284	1:2252315:C:G-ENSG00000234396.3	0.114855	-0.426429	0.214279	-0.0483356	-0.0861349	0.207151	0.163409	0.247656	0.224852	0.197328
ENSG00000234426.3	ENSG00000234426	6:88410154:T:A	0.0315661	0.0332795	0.0356656	0.0343814	0.0338253	6:88410154:T:A-ENSG00000234426.3	0.440751	0.440369	0.440184	0.440449	0.440386	0.281529	0.285172	0.332437	0.305513	0.422617
ENSG00000234902.6	ENSG00000234902	2:207219300:T:C	0.0399014	0.0281499	0.0397673	0.0424413	0.0427689	2:207219300:T:C-ENSG00000234902.6	0.261659	0.266791	0.263062	0.261963	0.261268	0.179176	0.186954	0.155419	0.250189	0.17898
ENSG00000234915.1	ENSG00000234915	1:212285673:G:T	0.00228995	0.00305328	0.00201489	0.00214519	0.000954319	1:212285673:G:T-ENSG00000234915.1	0.592295	0.591923	0.592569	0.592474	0.593606	0.282696	0.32515	0.235687	0.266235	0.26478
ENSG00000235237.1	ENSG00000235237	22:37166071:A:G	0.0217997	0.104017	0.118818	0.125694	0.122518	22:37166071:A:G-ENSG00000235237.1	0.215116	0.191202	0.190408	0.188041	0.18907	0.107047	0.148566	0.166745	0.195716	0.175731
ENSG00000235381.1	ENSG00000235381	6:155246749:A:G	0.126404	0.0720561	0.0834515	0.0325654	0.0586057	6:155246749:A:G-ENSG00000235381.1	0.215014	0.237864	0.230251	0.266791	0.243465	0.181367	0.178975	0.193349	0.160033	0.207993
ENSG00000236209.1	ENSG00000236209	2:74958729:G:T	1.4971e-25	2.00753e-24	2.34469e-19	4.43668e-31	3.55792e-24	2:74958729:G:T-ENSG00000236209.1	1.1712	1.1712	1.1712	1.1712	1.1712	0.128957	0.142294	0.160702	0.1357	0.142858
ENSG00000236255.2	ENSG00000236255	2:117836893:C:G	0.00799964	0.00833304	0.0083712	0.0058698	0.00768053	2:117836893:C:G-ENSG00000236255.2	0.324935	0.324937	0.325086	0.326788	0.325406	0.180065	0.181432	0.185555	0.155047	0.159092
ENSG00000236403.2	ENSG00000236403	9:134939675:T:C	2.16715e-05	3.18946e-05	3.02384e-05	4.64979e-05	1.10651e-05	9:134939675:T:C-ENSG00000236403.2	-0.507969	-0.507945	-0.508032	-0.508043	-0.50819	0.168145	0.187517	0.172065	0.195674	0.148793
ENSG00000236469.1	ENSG00000236469	2:71078326:C:T	3.23985e-06	2.34651e-06	2.64811e-06	3.91552e-06	2.07409e-06	2:71078326:C:T-ENSG00000236469.1	-0.675498	-0.675518	-0.675533	-0.675533	-0.675547	0.202334	0.211323	0.21848	0.249859	0.223537
ENSG00000236829.9	ENSG00000236829	16:333039:T:G	0.0451863	0.0323073	0.0293106	0.0203476	0.0323407	16:333039:T:G-ENSG00000236829.9	0.348594	0.35474	0.356017	0.362248	0.353498	0.25395	0.222236	0.280568	0.189289	0.247625
ENSG00000236935.3	ENSG00000236935	11:64340005:T:C	4.51311e-16	1.77691e-16	2.8631e-13	3.55477e-17	4.20288e-20	11:64340005:T:C-ENSG00000236935.3	0.876124	0.876124	0.876124	0.876124	0.876124	0.151075	0.137224	0.15619	0.134912	0.126168
ENSG00000237188.5	ENSG00000237188	1:147157163:T:G	0.0549267	0.0508305	0.0642003	0.0412459	0.0556626	1:147157163:T:G-ENSG00000237188.5	-0.209196	-0.211237	-0.20686	-0.215785	-0.20906	0.171185	0.166534	0.192994	0.142231	0.151055
ENSG00000237550.7	ENSG00000237550	15:82327383:T:C	0.0441476	0.0451108	0.0422735	0.0436502	0.0294556	15:82327383:T:C-ENSG00000237550.7	0.381032	0.380968	0.381928	0.38118	0.385692	0.29807	0.281533	0.281651	0.311536	0.222558
ENSG00000237899.1	ENSG00000237899	1:40685295:ATTATATATA:A	8.0943e-11	5.30916e-06	1.23403e-07	3.55001e-07	8.22009e-07	1:40685295:ATTATATATA:A-ENSG00000237899.1	0.701756	0.70173	0.701751	0.701746	0.701749	0.134197	0.207074	0.190437	0.159554	0.226654
ENSG00000238009.6	ENSG00000238009	1:127491:T:G	1.71595e-07	1.15615e-06	7.55473e-07	1.00937e-07	2.03203e-08	1:127491:T:G-ENSG00000238009.6	0.493705	0.49369	0.493803	0.493926	0.493945	0.143221	0.15017	0.154131	0.134588	0.108478
ENSG00000238142.4	ENSG00000238142	1:16889000:G:A	0.0107341	0.0105276	0.00988157	0.00934157	0.00800117	1:16889000:G:A-ENSG00000238142.4	0.487213	0.487429	0.487647	0.487885	0.488191	0.306066	0.311225	0.290186	0.258161	0.229534
ENSG00000239480.1	ENSG00000239480	7:102435529:C:T	0.277624	0.0344407	0.496776	0.10997	0.321761	7:102435529:C:T-ENSG00000239480.1	0.0847933	0.309025	-0.0150929	0.23513	-0.0766376	0.149769	0.128808	0.148541	0.147926	0.127523
ENSG00000240291.1	ENSG00000240291	10:18512308:A:T	3.24517e-07	1.16532e-06	2.39456e-07	9.58809e-08	2.06206e-07	10:18512308:A:T-ENSG00000240291.1	0.607562	0.607571	0.607617	0.607662	0.607647	0.160212	0.190327	0.165916	0.162754	0.208181
ENSG00000240674.1	ENSG00000240674	4:165062358:CTT:C	0.698096	0.71989	0.731879	0.00859509	0.651147	4:165062358:CTT:C-ENSG00000240674.1	0.041834	-0.0312326	0.0274057	-0.590267	0.0709129	0.21324	0.231072	0.226425	0.170787	0.212214
ENSG00000240710.1	ENSG00000240710	1:204556440:G:T	0.0893662	0.0758127	0.0313447	0.0023491	0.041361	1:204556440:G:T-ENSG00000240710.1	0.250347	0.255247	0.278546	0.310869	0.268751	0.170193	0.153953	0.133655	0.122081	0.146112
ENSG00000241490.1	ENSG00000241490	3:114240227:C:G	0.00711745	0.000980519	0.00480316	0.00626026	0.00903874	3:114240227:C:G-ENSG00000241490.1	0.315773	0.3204	0.318135	0.317174	0.315739	0.145467	0.117626	0.124923	0.190017	0.174719
ENSG00000241678.1	ENSG00000241678	11:6729747:G:C	0.0528696	0.0157653	0.0557081	0.0599951	0.0658236	11:6729747:G:C-ENSG00000241678.1	0.221405	0.235416	0.22141	0.220033	0.217717	0.168703	0.124819	0.126103	0.16025	0.162869
ENSG00000241770.1	ENSG00000241770	3:157160600:C:G	3.50319e-05	0.00296327	0.0021204	0.00256534	0.012124	3:157160600:C:G-ENSG00000241770.1	-0.497047	-0.490161	-0.491997	-0.490926	-0.486021	0.146194	0.177833	0.20481	0.187671	0.200557
ENSG00000241772.2	ENSG00000241772	2:138573096:T:C	0.0290262	0.0377634	0.0420227	0.0384264	0.0403878	2:138573096:T:C-ENSG00000241772.2	0.409277	0.405959	0.405293	0.406642	0.405618	0.263012	0.300137	0.270543	0.272755	0.327834
ENSG00000241962.9	ENSG00000241962	2:99154809:C:T	0.00363686	0.0203294	0.029162	0.022513	0.019468	2:99154809:C:T-ENSG00000241962.9	-0.269693	-0.261492	-0.258751	-0.261602	-0.262729	0.124911	0.140115	0.157447	0.169815	0.112367
ENSG00000242588.7	ENSG00000242588	7:128527825:C:T	4.12756e-06	2.16479e-05	1.25902e-05	1.37946e-05	1.35919e-05	7:128527825:C:T-ENSG00000242588.7	0.491059	0.490946	0.491052	0.491109	0.491159	0.157193	0.180133	0.13032	0.15265	0.220959
ENSG00000243176.8	ENSG00000243176	3:157163156:A:T	0.0415585	0.0306726	0.0554069	0.0432218	0.0047762	3:157163156:A:T-ENSG00000243176.8	0.281024	0.288845	0.276631	0.281205	0.30049	0.181477	0.155668	0.171845	0.175692	0.12291
ENSG00000243696.5	ENSG00000243696	3:52804386:T:C	0.26894	0.0027466	0.284156	0.428214	0.0926845	3:52804386:T:C-ENSG00000243696.5	0.126708	0.637045	-0.115636	-0.0473843	-0.310424	0.235218	0.192545	0.233713	0.250315	0.222985
ENSG00000244055.2	ENSG00000244055	7:92428788:CT:C	0.00666565	0.00559301	0.00648031	0.00577781	0.00344447	7:92428788:CT:C-ENSG00000244055.2	0.487967	0.488718	0.488227	0.488645	0.489742	0.258218	0.257341	0.268577	0.259249	0.206299
ENSG00000244063.1	ENSG00000244063	2:113879068:A:C	0.0581163	0.0563487	0.0536334	0.0542205	0.0220199	2:113879068:A:C-ENSG00000244063.1	0.270622	0.271839	0.272354	0.272273	0.284248	0.17574	0.217738	0.167093	0.217626	0.179242
ENSG00000247679.3	ENSG00000247679	5:177596097:A:T	0.0515141	0.0461637	0.0421508	0.0347878	0.0364162	5:177596097:A:T-ENSG00000247679.3	-0.2438	-0.246332	-0.246831	-0.250356	-0.248082	0.168847	0.194711	0.211795	0.182875	0.15816
ENSG00000248240.1	ENSG00000248240	5:43514894:C:T	0.190297	0.0488209	0.450154	0.169394	0.206578	5:43514894:C:T-ENSG00000248240.1	-0.24482	0.585378	0.0418667	0.242699	-0.24627	0.333529	0.295748	0.36806	0.347692	0.369099
ENSG00000248367.2	ENSG00000248367	5:180295533:A:G	5.62509e-05	5.49507e-05	4.44536e-05	3.91698e-05	4.72604e-05	5:180295533:A:G-ENSG00000248367.2	-0.445366	-0.445412	-0.445655	-0.445765	-0.445655	0.199817	0.164759	0.152865	0.135255	0.162847
ENSG00000248734.2	ENSG00000248734	5:96778789:T:C	0.00206863	0.00249164	0.00260438	0.00244845	0.00246752	5:96778789:T:C-ENSG00000248734.2	-0.565502	-0.565331	-0.565399	-0.565515	-0.565467	0.252665	0.254671	0.274628	0.287613	0.301837
ENSG00000249141.1	ENSG00000249141	6:166989620:T:C	1.17995e-08	7.42784e-09	8.01004e-12	5.08482e-14	2.35287e-08	6:166989620:T:C-ENSG00000249141.1	-0.534465	-0.534473	-0.534574	-0.534644	-0.534577	0.13494	0.115981	0.0979424	0.0901258	0.144052
ENSG00000249476.2	ENSG00000249476	5:109334720:A:G	1.63697e-16	5.91588e-15	3.89496e-12	4.30974e-13	1.00222e-14	5:109334720:A:G-ENSG00000249476.2	0.914997	0.914997	0.914997	0.914997	0.914997	0.150565	0.159842	0.182939	0.183091	0.177067
ENSG00000249685.1	ENSG00000249685	4:39128224:T:G	0.0637598	0.0599537	0.0536085	0.0504472	0.0281601	4:39128224:T:G-ENSG00000249685.1	0.226871	0.228759	0.229723	0.230836	0.236508	0.18422	0.188828	0.179306	0.156223	0.143027
ENSG00000249771.2	ENSG00000249771	4:41911844:A:G	0.000952166	0.00056741	0.00125784	0.000944576	0.00198897	4:41911844:A:G-ENSG00000249771.2	-0.666962	-0.667528	-0.666853	-0.667135	-0.666428	0.276022	0.239916	0.384091	0.320943	0.358171
ENSG00000249988.1	ENSG00000249988	4:14140241:G:C	0.00112686	0.00105718	0.00121959	0.00116122	0.00111189	4:14140241:G:C-ENSG00000249988.1	0.571822	0.571921	0.571911	0.571974	0.571973	0.216751	0.240629	0.305703	0.287143	0.292166
ENSG00000250075.7	ENSG00000250075	4:67431979:A:G	0.000140599	0.000163567	0.0002102	0.00014022	0.000139935	4:67431979:A:G-ENSG00000250075.7	-0.47363	-0.47362	-0.473623	-0.47392	-0.473851	0.187755	0.191146	0.169438	0.177645	0.174749
ENSG00000250081.1	ENSG00000250081	5:65514159:G:A	0.000228787	0.000156241	0.00024407	0.000250361	0.000262268	5:65514159:G:A-ENSG00000250081.1	0.525202	0.525352	0.52532	0.525336	0.525325	0.209165	0.182429	0.203305	0.201952	0.240008
ENSG00000250155.3	ENSG00000250155	5:36699333:C:T	2.83998e-08	1.19926e-07	2.87394e-09	1.3965e-08	1.77145e-10	5:36699333:C:T-ENSG00000250155.3	0.58027	0.580278	0.580337	0.580347	0.580377	0.150732	0.157317	0.134558	0.153585	0.120818
ENSG00000250195.1	ENSG00000250195	4:139043984:A:G	0.0265177	0.0275773	0.0269128	0.0277541	0.0267398	4:139043984:A:G-ENSG00000250195.1	0.560622	0.560375	0.560929	0.56038	0.560539	0.418012	0.385001	0.362043	0.37641	0.515071
ENSG00000250696.5	ENSG00000250696	4:69216109:G:T	0.00090196	0.000149597	4.88491e-05	0.00020251	0.00115824	4:69216109:G:T-ENSG00000250696.5	-0.407706	-0.408897	-0.410468	-0.409474	-0.40821	0.137417	0.128161	0.141374	0.195262	0.169408
ENSG00000250850.3	ENSG00000250850	9:37007772:G:C	0.015523	0.00437477	0.0148366	0.0145252	0.0115557	9:37007772:G:C-ENSG00000250850.3	0.304817	0.310661	0.305903	0.306032	0.307198	0.161378	0.141365	0.185888	0.159892	0.14762
ENSG00000251615.3	ENSG00000251615	4:8359924:C:G	0.0055335	0.00355689	0.00390033	0.00631463	3.705e-05	4:8359924:C:G-ENSG00000251615.3	0.463965	0.465578	0.465191	0.46393	0.469533	0.196275	0.186464	0.181033	0.193837	0.130782
ENSG00000251661.3	ENSG00000251661	11:330989:G:A	3.998e-07	1.47404e-05	2.03034e-07	7.0377e-06	1.80508e-06	11:330989:G:A-ENSG00000251661.3	-0.589343	-0.589296	-0.589412	-0.589364	-0.589386	0.172259	0.189252	0.140339	0.191843	0.185531
ENSG00000253200.1	ENSG00000253200	8:22570372:C:T	0.0123258	0.0136744	0.0126319	0.0139224	0.01212	8:22570372:C:T-ENSG00000253200.1	-0.542932	-0.542424	-0.543173	-0.542394	-0.543013	0.352082	0.373931	0.303978	0.364117	0.275201
ENSG00000253214.3	ENSG00000253214	8:81158650:A:T	0.0026276	0.0031854	0.00295184	0.00269159	0.00270939	8:81158650:A:T-ENSG00000253214.3	-0.395445	-0.39522	-0.395525	-0.395904	-0.395799	0.170258	0.234358	0.167144	0.186061	0.204853
ENSG00000253616.5	ENSG00000253616	8:23071837:C:T	9.19743e-06	1.6017e-06	5.33592e-06	2.86329e-06	2.70836e-06	8:23071837:C:T-ENSG00000253616.5	0.398034	0.398384	0.398356	0.398606	0.398569	0.14963	0.105208	0.133344	0.120898	0.120052
ENSG00000253653.1	ENSG00000253653	5:157308931:C:G	0.436658	0.209484	0.0157303	0.385932	0.368879	5:157308931:C:G-ENSG00000253653.1	0.0515416	0.200113	-0.402258	0.0809578	0.0793902	0.16144	0.158892	0.132948	0.195114	0.164547
ENSG00000253690.1	ENSG00000253690	8:28342347:C:T	0.0378943	0.0358155	0.0332275	0.0226339	0.0300701	8:28342347:C:T-ENSG00000253690.1	0.278725	0.280027	0.280343	0.285331	0.281287	0.179415	0.235801	0.203854	0.156464	0.189686
ENSG00000253736.5	ENSG00000253736	5:172772363:G:A	0.00885689	0.00936825	0.00938902	0.00938551	0.00739158	5:172772363:G:A-ENSG00000253736.5	-0.400188	-0.400084	-0.400359	-0.400363	-0.401049	0.200496	0.201542	0.227898	0.243062	0.216728
ENSG00000253986.1	ENSG00000253986	8:23539486:TG:T	0.497106	0.554915	0.00730694	0.357567	0.383541	8:23539486:TG:T-ENSG00000253986.1	-0.0483557	-0.025024	0.413521	-0.141571	-0.111817	0.231849	0.227386	0.123562	0.278956	0.243464
ENSG00000254459.1	ENSG00000254459	11:77872220:G:A	5.61981e-10	6.58222e-11	1.0183e-11	4.92728e-11	4.97824e-13	11:77872220:G:A-ENSG00000254459.1	-0.899872	-0.899872	-0.899872	-0.899873	-0.899873	0.20977	0.22318	0.208748	0.184981	0.180321
ENSG00000254595.1	ENSG00000254595	11:6530223:C:T	0.12845	0.0339247	0.141313	0.0753055	0.11071	11:6530223:C:T-ENSG00000254595.1	-0.264348	-0.325702	-0.260581	-0.297246	-0.271366	0.256816	0.188623	0.238726	0.228849	0.249457
ENSG00000254682.2	ENSG00000254682	11:71435531:G:A	4.12097e-10	5.38684e-10	6.40944e-12	1.19823e-10	1.30566e-17	11:71435531:G:A-ENSG00000254682.2	0.716725	0.716728	0.716733	0.716734	0.716738	0.145563	0.163074	0.144176	0.152742	0.102664
ENSG00000254789.4	ENSG00000254789	11:15575157:G:A	0.0178663	0.0160004	0.00919848	0.016182	0.0178993	11:15575157:G:A-ENSG00000254789.4	0.317157	0.317956	0.322536	0.318282	0.317453	0.201882	0.159197	0.149492	0.210043	0.210354
ENSG00000254810.2	ENSG00000254810	11:76607743:A:G	0.0584923	0.0498834	0.0530384	0.0431959	0.0527659	11:76607743:A:G-ENSG00000254810.2	0.209323	0.212937	0.21143	0.215954	0.210938	0.159756	0.167889	0.155468	0.170325	0.162089
ENSG00000254851.1	ENSG00000254851	11:117169081:G:A	1.44329e-15	1.00864e-12	0	0	2.22045e-16	11:117169081:G:A-ENSG00000254851.1	-0.914828	-0.914828	-0.914828	-0.914828	-0.914828	0.152959	0.204363	0.126247	0.140542	0.156174
ENSG00000254859.1	ENSG00000254859	8:143535521:A:G	3.57714e-13	0	2.52465e-12	1.21347e-10	4.82288e-11	8:143535521:A:G-ENSG00000254859.1	-0.772869	-0.77287	-0.77287	-0.77287	-0.77287	0.109391	0.0824513	0.129594	0.141408	0.169054
ENSG00000254910.1	ENSG00000254910	11:316071:G:T	6.68628e-13	1.05806e-13	2.06635e-11	4.7597e-12	8.27525e-12	11:316071:G:T-ENSG00000254910.1	1.08088	1.08088	1.08088	1.08088	1.08088	0.243657	0.226692	0.228676	0.217127	0.248549
ENSG00000254929.6	ENSG00000254929	10:47504806:C:T	0.0195584	0.0170961	0.0209578	0.0188487	0.0176132	10:47504806:C:T-ENSG00000254929.6	-0.462698	-0.463862	-0.462545	-0.463358	-0.463532	0.309435	0.25824	0.35742	0.253088	0.304635
ENSG00000255026.1	ENSG00000255026	11:296273:AG:A	0.0173611	0.0329996	0.0380002	0.0365947	0.0361534	11:296273:AG:A-ENSG00000255026.1	0.193462	0.188957	0.188369	0.188816	0.188469	0.129294	0.162175	0.152603	0.129199	0.0920992
ENSG00000255328.2	ENSG00000255328	11:331996:C:T	8.02182e-10	1.44773e-12	2.37772e-09	1.08554e-08	4.33447e-10	11:331996:C:T-ENSG00000255328.2	-0.624852	-0.624867	-0.624868	-0.624874	-0.624877	0.149179	0.112792	0.14866	0.164735	0.136525
ENSG00000255422.4	ENSG00000255422	11:118749358:G:GAA	3.63895e-07	6.7925e-07	3.98475e-07	3.06476e-07	3.00468e-07	11:118749358:G:GAA-ENSG00000255422.4	-0.681617	-0.68162	-0.681638	-0.681651	-0.681649	0.195411	0.231462	0.202527	0.198884	0.202539
ENSG00000255432.1	ENSG00000255432	11:62669528:C:T	0.00154616	0.00412296	0.00661776	0.00709924	0.00702672	11:62669528:C:T-ENSG00000255432.1	0.430782	0.429216	0.428129	0.427985	0.428029	0.166763	0.181355	0.198013	0.228446	0.250486
ENSG00000255621.1	ENSG00000255621	12:12977089:C:G	0.0531498	0.0567574	0.0425173	0.048669	0.0181421	12:12977089:C:G-ENSG00000255621.1	0.261503	0.260626	0.266191	0.262965	0.274887	0.185428	0.196875	0.159863	0.192487	0.154698
ENSG00000255641.1	ENSG00000255641	12:10423126:C:T	0.0245819	0.00765077	0.0406262	0.0388312	0.0475602	12:10423126:C:T-ENSG00000255641.1	0.277831	0.28594	0.270794	0.271941	0.268387	0.15631	0.127658	0.15301	0.199257	0.170877
ENSG00000255730.5	ENSG00000255730	19:41384098:C:T	8.27385e-06	0.0349484	0.001589	0.0148756	0.000128096	19:41384098:C:T-ENSG00000255730.5	-0.37754	-0.339676	-0.356877	-0.349135	-0.378259	0.100007	0.116626	0.111352	0.153266	0.120005
ENSG00000255801.2	ENSG00000255801	12:8549898:A:G	0.000666355	0.00149254	0.00111693	0.00121413	0.00107508	12:8549898:A:G-ENSG00000255801.2	0.429285	0.428534	0.429136	0.429019	0.429146	0.187574	0.180837	0.192662	0.187519	0.164019
ENSG00000255847.5	ENSG00000255847	11:74003517:G:A	0.0022123	0.00259497	0.00236479	0.00202541	0.00216649	11:74003517:G:A-ENSG00000255847.5	0.315449	0.315138	0.315667	0.316395	0.316023	0.147146	0.144893	0.138636	0.145706	0.157533
ENSG00000256357.1	ENSG00000256357	14:94416307:C:T	0.0491291	0.049753	0.0725557	0.0705047	0.0758258	14:94416307:C:T-ENSG00000256357.1	0.242102	0.241791	0.236608	0.237149	0.234767	0.190576	0.175168	0.187251	0.221497	0.176692
ENSG00000256433.3	ENSG00000256433	12:6395197:T:C	0.00238292	0.00162726	0.00259111	0.00243478	0.00217086	12:6395197:T:C-ENSG00000256433.3	0.564024	0.564462	0.564081	0.564199	0.564288	0.293404	0.195933	0.285998	0.337021	0.347003
ENSG00000256448.5	ENSG00000256448	11:73395363:C:T	0.000585962	7.53462e-05	2.75375e-06	0.000581969	9.48135e-05	11:73395363:C:T-ENSG00000256448.5	0.466865	0.46738	0.468548	0.467035	0.467789	0.193169	0.128619	0.126874	0.153443	0.181337
ENSG00000256673.1	ENSG00000256673	12:9418824:C:T	0.0417351	0.0456351	0.0411963	0.0397741	0.0289791	12:9418824:C:T-ENSG00000256673.1	-0.405419	-0.404188	-0.405588	-0.406001	-0.409941	0.32421	0.302551	0.307579	0.267901	0.255831
ENSG00000257027.1	ENSG00000257027	12:9650807:T:TA	0.0029072	0.00169999	0.00274916	0.0026341	0.00283649	12:9650807:T:TA-ENSG00000257027.1	-0.341995	-0.342948	-0.342702	-0.342882	-0.342662	0.165934	0.122364	0.177418	0.160757	0.220165
ENSG00000257086.1	ENSG00000257086	11:64244142:CTG:C	0.749502	0.799763	0.737053	0.732897	0.00419753	11:64244142:CTG:C-ENSG00000257086.1	-0.0352417	-0.0197893	-0.0402393	-0.0448805	-0.480371	0.184652	0.200326	0.175752	0.207042	0.139415
ENSG00000257176.3	ENSG00000257176	12:29338595:A:G	2.18697e-16	2.43145e-23	1.33405e-17	3.36469e-15	2.46128e-16	12:29338595:A:G-ENSG00000257176.3	0.988098	0.988098	0.988098	0.988098	0.988098	0.158834	0.137151	0.153508	0.15459	0.149659
ENSG00000257221.4	ENSG00000257221	12:108624642:T:A	0.0319763	0.0319175	0.0232671	0.0242879	0.0205636	12:108624642:T:A-ENSG00000257221.4	0.297958	0.298393	0.301799	0.300582	0.301805	0.200555	0.213749	0.198219	0.177986	0.180991
ENSG00000257275.6	ENSG00000257275	14:95675305:A:G	0.000174242	0.000149979	0.000144411	0.000152205	0.000180234	14:95675305:A:G-ENSG00000257275.6	0.350002	0.350377	0.350777	0.35069	0.350256	0.140218	0.155982	0.145441	0.139574	0.108632
ENSG00000257511.1	ENSG00000257511	12:32726124:T:TAA	0.0282064	0.017239	0.0234757	0.0219618	0.023387	12:32726124:T:TAA-ENSG00000257511.1	-0.374788	-0.381372	-0.377466	-0.377989	-0.376788	0.331093	0.261612	0.242255	0.186106	0.219042
ENSG00000257681.1	ENSG00000257681	12:103773407:C:T	0.00453623	0.00290082	0.000341554	0.0025788	0.00487787	12:103773407:C:T-ENSG00000257681.1	0.473533	0.474456	0.478174	0.475	0.473683	0.212691	0.194274	0.156402	0.203155	0.249796
ENSG00000257715.1	ENSG00000257715	12:96022064:A:C	0.000148851	0.000462049	6.14131e-05	0.00022909	0.000820642	12:96022064:A:C-ENSG00000257715.1	-0.515782	-0.515473	-0.51639	-0.515842	-0.515414	0.171144	0.213591	0.164024	0.213846	0.210817
ENSG00000257878.3	ENSG00000257878	12:95991661:G:A	3.3372e-07	3.72687e-09	7.56276e-10	5.80051e-09	1.4223e-09	12:95991661:G:A-ENSG00000257878.3	-0.638759	-0.638771	-0.638797	-0.638795	-0.638804	0.24605	0.145339	0.145989	0.146608	0.170135
ENSG00000258302.2	ENSG00000258302	12:89525853:ACC:A	0.000920764	0.000133258	0.000154157	1.55547e-05	0.000197584	12:89525853:ACC:A-ENSG00000258302.2	0.435162	0.435957	0.436078	0.437138	0.436121	0.175626	0.138191	0.146341	0.137363	0.156763
ENSG00000258473.2	ENSG00000258473	14:77102091:AAAAAC:A	0.0290756	0.0231121	0.0351329	0.0325973	0.0305387	14:77102091:AAAAAC:A-ENSG00000258473.2	-0.34247	-0.345757	-0.341161	-0.342085	-0.342384	0.213522	0.250941	0.240842	0.227362	0.199337
ENSG00000258572.1	ENSG00000258572	14:95470995:AG:A	0.0515418	0.0411532	0.0573969	0.0549787	0.0533959	14:95470995:AG:A-ENSG00000258572.1	-0.372098	-0.376098	-0.371361	-0.37199	-0.371834	0.306427	0.230596	0.337663	0.278803	0.325724
ENSG00000258728.2	ENSG00000258728	9:34639477:C:T	0.0216933	0.0260424	0.0202231	0.00047125	0.038214	9:34639477:C:T-ENSG00000258728.2	0.252242	0.250011	0.252059	0.263658	0.246502	0.176202	0.155526	0.115284	0.0756078	0.155557
ENSG00000258824.2	ENSG00000258824	14:64446951:C:T	0.14176	0.166775	0.0369266	0.138889	0.146411	14:64446951:C:T-ENSG00000258824.2	0.136971	0.131091	0.183956	0.138311	0.136574	0.105531	0.129351	0.120362	0.121424	0.144348
ENSG00000258944.1	ENSG00000258944	14:73307687:G:A	1.50535e-05	4.96668e-05	9.03093e-05	8.71762e-05	7.21822e-05	14:73307687:G:A-ENSG00000258944.1	-0.667684	-0.667617	-0.667599	-0.66761	-0.667624	0.209735	0.208659	0.276891	0.269344	0.263826
ENSG00000259015.1	ENSG00000259015	14:72960158:AT:A	0.0074568	0.00118658	0.00405882	0.00587752	0.00506803	14:72960158:AT:A-ENSG00000259015.1	-0.427518	-0.431995	-0.430076	-0.428534	-0.428889	0.23285	0.1563	0.195279	0.19746	0.212422
ENSG00000259052.1	ENSG00000259052	14:100269903:G:C	0.520056	0.674984	0.608147	0.675395	0.0143448	14:100269903:G:C-ENSG00000259052.1	0.0870289	0.040114	0.0569424	0.0358491	0.414866	0.194892	0.212693	0.234905	0.26218	0.152492
ENSG00000259097.3	ENSG00000259097	14:98214372:C:A	3.55037e-05	2.76594e-05	4.43127e-05	3.44124e-05	1.13248e-05	14:98214372:C:A-ENSG00000259097.3	0.617839	0.617886	0.617882	0.617927	0.617999	0.203286	0.206992	0.210572	0.251313	0.21034
ENSG00000259268.2	ENSG00000259268	15:63456608:C:T	0.00574895	0.00717735	0.00927377	0.010976	0.0100187	15:63456608:C:T-ENSG00000259268.2	-0.428081	-0.427582	-0.427279	-0.426419	-0.426813	0.171533	0.20917	0.245081	0.334862	0.307624
ENSG00000259321.1	ENSG00000259321	14:24135830:A:G	0.000436987	7.92971e-05	0.000345177	6.79666e-05	0.000105749	14:24135830:A:G-ENSG00000259321.1	0.282111	0.283721	0.283313	0.285107	0.284857	0.0996858	0.0862076	0.122905	0.0982661	0.16822
ENSG00000259363.6	ENSG00000259363	15:99783329:C:CAA	0.0799215	0.0942671	0.0422973	0.0869052	0.0823211	15:99783329:C:CAA-ENSG00000259363.6	0.22662	0.221121	0.249578	0.223436	0.225435	0.200011	0.155513	0.167439	0.19235	0.235425
ENSG00000259385.1	ENSG00000259385	15:48250679:T:A	1.6031e-15	1.3825e-15	1.85321e-10	1.5611e-13	3.6508e-14	15:48250679:T:A-ENSG00000259385.1	0.607913	0.607912	0.607918	0.607932	0.607935	0.10684	0.0898648	0.124595	0.108314	0.111936
ENSG00000259418.1	ENSG00000259418	15:45031348:G:A	0.0789917	0.0702834	0.077112	0.044873	0.0688114	15:45031348:G:A-ENSG00000259418.1	0.424939	0.429693	0.425529	0.44743	0.428531	0.397586	0.376496	0.388273	0.294948	0.369681
ENSG00000259539.1	ENSG00000259539	15:45157591:G:T	0.769487	0.78169	0.00455564	0.792195	0.795728	15:45157591:G:T-ENSG00000259539.1	-0.0145676	-0.0117759	0.431484	0.00781865	0.00666449	0.144976	0.161006	0.11564	0.156765	0.161528
ENSG00000259628.1	ENSG00000259628	7:77066199:T:G	7.60365e-07	2.83201e-08	3.02531e-08	2.3841e-07	7.20282e-09	7:77066199:T:G-ENSG00000259628.1	-0.408675	-0.408953	-0.409222	-0.40907	-0.409359	0.11704	0.10068	0.115551	0.106347	0.0971108
ENSG00000259652.1	ENSG00000259652	15:77034201:TG:T	1.06921e-08	1.63551e-08	1.06426e-12	5.33291e-10	1.06337e-12	15:77034201:TG:T-ENSG00000259652.1	-0.841813	-0.841813	-0.841815	-0.841815	-0.841815	0.219515	0.178763	0.163019	0.214193	0.165994
ENSG00000259755.1	ENSG00000259755	15:101069440:C:T	0.0745305	0.047113	0.112295	0.123326	0.136793	15:101069440:C:T-ENSG00000259755.1	-0.3366	-0.355601	-0.318118	-0.312275	-0.304479	0.320305	0.217901	0.303699	0.339224	0.298575
ENSG00000259865.1	ENSG00000259865	1:247210326:T:C	0.0349407	0.0287456	0.0257985	0.0236377	0.0157185	1:247210326:T:C-ENSG00000259865.1	0.229436	0.2322	0.232839	0.233533	0.236274	0.208211	0.137617	0.16897	0.118876	0.148499
ENSG00000259959.1	ENSG00000259959	4:47839420:T:G	1.70054e-08	2.17256e-07	3.40716e-06	1.76348e-06	1.12445e-06	4:47839420:T:G-ENSG00000259959.1	0.614902	0.61489	0.614882	0.614898	0.614909	0.151456	0.15728	0.168849	0.170221	0.20901
ENSG00000260070.1	ENSG00000260070	7:36299232:T:C	0.0176575	0.0159086	0.00982605	0.0154258	0.0290864	7:36299232:T:C-ENSG00000260070.1	-0.353152	-0.353761	-0.361907	-0.354728	-0.348202	0.199371	0.184269	0.188144	0.21173	0.218599
ENSG00000260306.1	ENSG00000260306	16:21797012:C:T	1.43034e-10	1.24256e-12	1.75794e-09	3.33067e-16	0	16:21797012:C:T-ENSG00000260306.1	-0.793721	-0.793721	-0.793722	-0.793723	-0.793723	0.183127	0.131574	0.167578	0.122693	0.10076
ENSG00000260563.3	ENSG00000260563	17:82276688:C:T	0.00537168	0.0186943	0.0224338	0.0227645	0.0221787	17:82276688:C:T-ENSG00000260563.3	-0.383095	-0.378178	-0.377654	-0.377569	-0.377826	0.140366	0.207897	0.24318	0.340981	0.314904
ENSG00000260803.1	ENSG00000260803	16:33206:T:TACAC	4.75496e-11	4.44906e-10	2.46947e-10	4.40916e-10	1.1706e-10	16:33206:T:TACAC-ENSG00000260803.1	-0.997212	-0.997212	-0.997212	-0.997213	-0.997213	0.2247	0.247554	0.229449	0.263791	0.262732
ENSG00000260851.7	ENSG00000260851	16:66509747:A:G	6.88237e-14	6.89445e-12	5.50253e-12	1.06781e-09	1.01495e-11	16:66509747:A:G-ENSG00000260851.7	0.81675	0.81675	0.816751	0.816751	0.816751	0.152798	0.170352	0.170051	0.190021	0.18092
ENSG00000260861.6	ENSG00000260861	20:1622058:T:C	0.00381339	0.00263534	0.00403313	0.00358691	0.0036081	20:1622058:T:C-ENSG00000260861.6	-0.418916	-0.419663	-0.419067	-0.419458	-0.419313	0.262796	0.173698	0.195028	0.189507	0.214083
ENSG00000260911.2	ENSG00000260911	16:31084843:G:C	0.342393	0.399658	0.360534	0.47972	9.03717e-05	16:31084843:G:C-ENSG00000260911.2	0.162716	0.139292	0.160767	0.109772	0.456417	0.111339	0.150828	0.145773	0.126465	0.113807
ENSG00000260947.1	ENSG00000260947	9:33719737:T:C	0.0688412	0.0767886	0.0611894	0.0152811	0.0754401	9:33719737:T:C-ENSG00000260947.1	0.248339	0.245053	0.251747	0.284772	0.245501	0.189823	0.162617	0.143655	0.164801	0.17497
ENSG00000261000.1	ENSG00000261000	1:206503050:C:A	6.41516e-09	1.19928e-10	2.39263e-13	1.15996e-11	6.23807e-10	1:206503050:C:A-ENSG00000261000.1	0.73335	0.733353	0.733356	0.733358	0.733357	0.223446	0.193206	0.11327	0.15997	0.20196
ENSG00000261098.1	ENSG00000261098	11:107326509:A:T	0.00086171	0.00274678	0.00714825	0.00421752	0.00281946	11:107326509:A:T-ENSG00000261098.1	-0.33132	-0.32981	-0.327969	-0.329622	-0.330729	0.116363	0.13544	0.160757	0.206028	0.151433
ENSG00000261159.1	ENSG00000261159	3:128909090:C:T	0.0424664	0.044548	0.039758	0.0324035	0.0396229	3:128909090:C:T-ENSG00000261159.1	0.298125	0.2978	0.299154	0.302316	0.298864	0.205765	0.253076	0.211034	0.187367	0.224889
ENSG00000261208.1	ENSG00000261208	14:52272742:G:A	0.0971847	0.107304	0.0929584	0.00936462	0.106985	14:52272742:G:A-ENSG00000261208.1	0.330771	0.326797	0.333038	0.389354	0.32677	0.222194	0.271569	0.23448	0.163141	0.233706
ENSG00000261222.4	ENSG00000261222	17:74554846:G:A	6.4669e-10	4.56519e-09	1.47411e-09	3.19538e-10	2.65101e-11	17:74554846:G:A-ENSG00000261222.4	0.709946	0.709948	0.709954	0.709958	0.709961	0.170449	0.201748	0.176801	0.158101	0.147065
ENSG00000261305.2	ENSG00000261305	7:150324510:G:C	0.0315796	0.0274576	0.0160955	0.0327755	0.0260994	7:150324510:G:C-ENSG00000261305.2	0.513102	0.515572	0.526545	0.512387	0.515578	0.326715	0.415566	0.272564	0.394997	0.329129
ENSG00000261338.2	ENSG00000261338	2:218244190:C:A	7.73779e-07	0	1.45728e-10	7.14042e-10	3.23142e-12	2:218244190:C:A-ENSG00000261338.2	-0.869738	-0.869742	-0.86974	-0.86974	-0.869741	0.202526	0.126707	0.171323	0.15804	0.155808
ENSG00000261526.3	ENSG00000261526	19:1883952:T:C	0.530923	0.662494	0.740254	0.619149	0.00697205	19:1883952:T:C-ENSG00000261526.3	0.119464	0.0250036	0.0022511	-0.0442969	-0.513142	0.208191	0.154966	0.20333	0.179609	0.151183
ENSG00000261613.2	ENSG00000261613	16:2558000:G:A	4.50353e-08	5.06448e-08	6.11516e-08	6.70507e-08	1.11768e-08	16:2558000:G:A-ENSG00000261613.2	0.759965	0.759967	0.759973	0.759975	0.759978	0.211766	0.20425	0.245954	0.229981	0.182344
ENSG00000261799.1	ENSG00000261799	12:248312:GA:G	0.0188951	0.665398	0.789056	0.747262	0.75881	12:248312:GA:G-ENSG00000261799.1	-0.210114	-0.0314971	-0.012184	-0.0194925	-0.0171133	0.0822438	0.118529	0.0995712	0.119534	0.114176
ENSG00000261804.3	ENSG00000261804	16:53387327:G:A	3.68662e-09	8.71553e-09	1.23139e-09	1.16069e-08	3.38966e-08	16:53387327:G:A-ENSG00000261804.3	-0.549048	-0.549053	-0.549117	-0.549111	-0.549115	0.148572	0.140718	0.114976	0.138326	0.162008
ENSG00000261996.1	ENSG00000261996	17:6652703:A:G	8.33348e-05	3.95761e-05	5.21639e-05	3.43379e-05	1.09839e-09	17:6652703:A:G-ENSG00000261996.1	0.683543	0.683657	0.683629	0.683716	0.684284	0.181429	0.178839	0.181923	0.178754	0.161443
ENSG00000262049.2	ENSG00000262049	17:81682538:G:T	0.625768	0.564462	0.541527	0.00554272	0.558472	17:81682538:G:T-ENSG00000262049.2	0.0437448	-0.0712174	0.0865216	0.574795	-0.0758093	0.278697	0.218161	0.253092	0.165798	0.222011
ENSG00000262370.7	ENSG00000262370	16:3086918:T:C	9.25396e-06	8.02232e-06	1.12485e-05	5.91992e-08	2.5117e-06	16:3086918:T:C-ENSG00000262370.7	0.547772	0.547802	0.547842	0.548087	0.547961	0.173797	0.164059	0.152073	0.136775	0.148162
ENSG00000262580.5	ENSG00000262580	17:80201684:T:C	1.27087e-07	1.28985e-07	2.48287e-08	1.7718e-12	5.34905e-13	17:80201684:T:C-ENSG00000262580.5	-0.670244	-0.670235	-0.670264	-0.670289	-0.670293	0.190797	0.121955	0.157934	0.127049	0.134121
ENSG00000262714.1	ENSG00000262714	16:53387327:G:A	1.47948e-09	5.14836e-08	5.29798e-13	1.5617e-11	6.41e-09	16:53387327:G:A-ENSG00000262714.1	-0.623424	-0.623424	-0.623468	-0.62346	-0.623458	0.14064	0.15552	0.12437	0.112721	0.15748
ENSG00000262877.5	ENSG00000262877	17:81389928:C:T	2.27185e-10	2.2867e-10	2.11069e-09	9.0408e-09	4.55072e-09	17:81389928:C:T-ENSG00000262877.5	0.70176	0.701763	0.701765	0.701767	0.701769	0.156415	0.185881	0.16402	0.165287	0.190758
ENSG00000262879.7	ENSG00000262879	17:47056646:C:T	1.93569e-06	1.53935e-08	1.07865e-05	2.52742e-07	1.39766e-08	17:47056646:C:T-ENSG00000262879.7	-0.371422	-0.371958	-0.371369	-0.372091	-0.372482	0.112729	0.082257	0.0926406	0.10031	0.0930012
ENSG00000264187.1	ENSG00000264187	17:17225199:G:T	0.00224824	0.0131777	0.0110581	0.0193345	0.00818995	17:17225199:G:T-ENSG00000264187.1	-0.530627	-0.520541	-0.522175	-0.517928	-0.525355	0.204121	0.247497	0.289416	0.288531	0.323247
ENSG00000264659.2	ENSG00000264659	17:74695746:C:T	8.48443e-08	1.0273e-07	1.0067e-07	8.27706e-08	9.13561e-08	17:74695746:C:T-ENSG00000264659.2	1.11299	1.11299	1.11299	1.11299	1.11299	0.299427	0.428405	0.391827	0.299568	0.343249
ENSG00000264668.2	ENSG00000264668	8:143270494:G:A	0.800089	0.799669	0.69824	0.0377175	0.797437	8:143270494:G:A-ENSG00000264668.2	0.00314904	0.00320853	0.0399227	0.486411	-0.0106836	0.18123	0.190456	0.185584	0.168074	0.182297
ENSG00000264701.1	ENSG00000264701	17:47981705:T:C	1.55482e-06	1.27571e-06	2.24847e-06	2.7576e-06	1.96611e-06	17:47981705:T:C-ENSG00000264701.1	0.562182	0.562214	0.56223	0.562244	0.562255	0.174363	0.159617	0.181979	0.18606	0.175167
ENSG00000265401.1	ENSG00000265401	17:16413290:AGTGTGTGT:A	0.299076	0.372681	0.0445088	0.246058	0.396136	17:16413290:AGTGTGTGT:A-ENSG00000265401.1	0.136822	0.0871931	-0.44621	-0.153949	0.0763431	0.230327	0.207178	0.178812	0.229355	0.200941
ENSG00000265750.1	ENSG00000265750	18:24135198:C:T	0.0147789	0.0247485	0.0273631	0.0267923	0.0286901	18:24135198:C:T-ENSG00000265750.1	-0.348181	-0.344355	-0.34444	-0.344598	-0.343772	0.192827	0.190154	0.226004	0.212	0.239079
ENSG00000265975.1	ENSG00000265975	17:8968438:A:G	0.017979	0.0310366	0.0362494	0.0386215	0.0363106	17:8968438:A:G-ENSG00000265975.1	0.24548	0.241327	0.241135	0.240361	0.241053	0.140649	0.144889	0.139495	0.209191	0.179476
ENSG00000266490.1	ENSG00000266490	17:30767757:G:A	0.021338	0.588549	0.380565	0.543447	0.416218	17:30767757:G:A-ENSG00000266490.1	-0.377827	0.0260164	-0.115787	-0.0472058	-0.110101	0.16163	0.227139	0.21048	0.253278	0.229859
ENSG00000266947.3	ENSG00000266947	17:35238993:C:G	0.060248	0.0579406	0.0276726	0.048583	0.0522074	17:35238993:C:G-ENSG00000266947.3	0.31342	0.31458	0.329871	0.317467	0.315941	0.238872	0.299067	0.1629	0.235592	0.332362
ENSG00000266957.1	ENSG00000266957	18:47076493:G:A	0.0166982	0.0176496	0.0164405	0.0168261	0.0167559	18:47076493:G:A-ENSG00000266957.1	0.60082	0.600572	0.60119	0.600866	0.600776	0.373331	0.446638	0.339304	0.410955	0.428362
ENSG00000266980.1	ENSG00000266980	17:75852396:A:G	0.0119287	0.5815	0.610475	0.622395	0.650798	17:75852396:A:G-ENSG00000266980.1	-0.277078	-0.0714683	-0.0685488	-0.0636118	-0.054399	0.110132	0.136839	0.171947	0.167439	0.186657
ENSG00000266998.2	ENSG00000266998	17:77374386:T:G	2.14893e-05	1.02893e-05	2.19587e-05	5.7625e-06	7.95609e-06	17:77374386:T:G-ENSG00000266998.2	-0.515818	-0.515929	-0.515946	-0.51616	-0.516104	0.17415	0.17253	0.170236	0.15113	0.181198
ENSG00000267009.6	ENSG00000267009	17:68428200:G:C	0.00564093	0.00471539	0.00454144	0.00431962	0.00398802	17:68428200:G:C-ENSG00000267009.6	-0.403617	-0.404362	-0.404558	-0.404709	-0.404765	0.20113	0.205042	0.212303	0.182512	0.209759
ENSG00000267174.7	ENSG00000267174	19:11301469:G:A	8.19567e-13	2.35802e-09	1.25927e-09	1.80781e-11	2.15439e-12	19:11301469:G:A-ENSG00000267174.7	-0.497203	-0.497178	-0.497229	-0.497307	-0.49732	0.0954374	0.119628	0.106701	0.101449	0.0957897
ENSG00000267283.1	ENSG00000267283	19:1950043:T:C	0.000132189	0.000114577	8.18925e-05	2.67054e-05	0.000314667	19:1950043:T:C-ENSG00000267283.1	-0.229864	-0.230327	-0.23066	-0.232873	-0.230799	0.0823185	0.0849933	0.0674182	0.0841432	0.124405
ENSG00000267288.2	ENSG00000267288	17:45148227:G:C	0.0265586	0.0336032	0.0149173	0.0082293	0.022003	17:45148227:G:C-ENSG00000267288.2	-0.370913	-0.368097	-0.37786	-0.384578	-0.372662	0.270619	0.237528	0.192528	0.174786	0.222081
ENSG00000267359.1	ENSG00000267359	17:35539318:C:A	0.702298	0.629138	0.586177	0.732694	0.0299037	17:35539318:C:A-ENSG00000267359.1	-0.00460912	0.0389811	0.0893252	0.00118846	-0.514356	0.206788	0.194993	0.23843	0.264489	0.192173
ENSG00000267379.1	ENSG00000267379	19:14388609:A:G	0.033526	0.0341981	0.0343171	0.0327887	0.0207038	19:14388609:A:G-ENSG00000267379.1	0.271359	0.271373	0.271349	0.271941	0.275039	0.210112	0.195099	0.17324	0.173783	0.154062
ENSG00000267436.1	ENSG00000267436	19:3541169:C:CA	0.011209	0.0130138	0.00927821	0.00384337	0.0119888	19:3541169:C:CA-ENSG00000267436.1	-0.286189	-0.285334	-0.288089	-0.29289	-0.286056	0.162148	0.146494	0.143734	0.141642	0.139955
ENSG00000267512.1	ENSG00000267512	19:13147079:A:AAC	0.0445498	0.0680941	0.0439799	0.0143206	0.0406605	19:13147079:A:AAC-ENSG00000267512.1	-0.36663	-0.355584	-0.365991	-0.391351	-0.367967	0.274568	0.250067	0.232379	0.196087	0.227213
ENSG00000267546.2	ENSG00000267546	17:76551918:G:T	0.000797546	0.00135306	0.0022683	0.00271971	0.00183875	17:76551918:G:T-ENSG00000267546.2	-0.45108	-0.450759	-0.450363	-0.450195	-0.45069	0.160296	0.17894	0.227144	0.242577	0.213332
ENSG00000267547.1	ENSG00000267547	17:35401171:T:G	0.000180642	0.000365791	0.000212286	0.000120024	5.15296e-05	17:35401171:T:G-ENSG00000267547.1	0.390105	0.389999	0.390377	0.390916	0.391068	0.150114	0.178019	0.152994	0.126777	0.123132
ENSG00000267568.6	ENSG00000267568	17:76948627:T:C	0.00381378	0.0153257	0.0165792	0.0148801	0.0167842	17:76948627:T:C-ENSG00000267568.6	0.295059	0.290325	0.290289	0.291543	0.290347	0.13246	0.163163	0.152384	0.147661	0.151653
ENSG00000267731.1	ENSG00000267731	17:68193495:A:G	8.39111e-05	5.96731e-05	6.824e-05	4.71516e-05	3.93718e-05	17:68193495:A:G-ENSG00000267731.1	-0.408967	-0.409286	-0.409433	-0.409902	-0.409781	0.133889	0.143664	0.151974	0.171374	0.138471
ENSG00000267745.1	ENSG00000267745	17:35428375:C:T	0.0370192	0.0679989	0.0712176	0.0738399	0.0711762	17:35428375:C:T-ENSG00000267745.1	0.305884	0.294359	0.295055	0.293899	0.294796	0.20593	0.215261	0.205091	0.278641	0.251862
ENSG00000267787.7	ENSG00000267787	18:57682007:ATT:A	0.00335014	0.00344631	0.00316725	0.00242717	0.00298878	18:57682007:ATT:A-ENSG00000267787.7	0.31687	0.317272	0.317695	0.318677	0.317866	0.124994	0.192315	0.164238	0.150342	0.158393
ENSG00000267801.1	ENSG00000267801	17:75892662:G:A	0.0111351	0.0115439	0.00913441	0.0113138	0.0107563	17:75892662:G:A-ENSG00000267801.1	0.409371	0.40936	0.410953	0.409601	0.40974	0.216157	0.245629	0.195059	0.276129	0.23233
ENSG00000267980.1	ENSG00000267980	19:4359528:A:G	0.000307675	0.000369167	0.0004683	0.000464748	0.00045574	19:4359528:A:G-ENSG00000267980.1	-0.554504	-0.55451	-0.554503	-0.554534	-0.554534	0.181867	0.242589	0.24521	0.25901	0.253779
ENSG00000268047.1	ENSG00000268047	19:49822141:C:T	0.0269705	0.0279104	0.0279088	0.0266842	0.0234912	19:49822141:C:T-ENSG00000268047.1	0.646419	0.646221	0.646227	0.646578	0.64754	0.497623	0.433071	0.495957	0.494238	0.511363
ENSG00000268081.3	ENSG00000268081	19:21540395:T:C	4.06342e-14	2.49765e-11	1.07852e-09	1.07503e-12	1.48003e-10	19:21540395:T:C-ENSG00000268081.3	-0.835339	-0.835339	-0.835339	-0.83534	-0.83534	0.164111	0.173538	0.188618	0.159793	0.193367
ENSG00000268112.1	ENSG00000268112	19:17751322:G:A	0.00155963	0.00119195	0.00159273	0.00242812	0.0016424	19:17751322:G:A-ENSG00000268112.1	-0.362043	-0.362715	-0.362707	-0.361954	-0.362498	0.150174	0.155898	0.162983	0.168732	0.164421
ENSG00000268119.8	ENSG00000268119	19:21428238:T:A	0.0156163	0.0199026	0.0222858	0.0218218	0.0219258	19:21428238:T:A-ENSG00000268119.8	-0.287935	-0.286599	-0.286651	-0.28684	-0.286597	0.173416	0.162591	0.181525	0.193754	0.167621
ENSG00000268204.1	ENSG00000268204	19:7629507:G:A	2.98625e-08	1.84313e-05	3.56327e-09	9.76366e-11	2.08718e-06	19:7629507:G:A-ENSG00000268204.1	-0.627388	-0.627348	-0.627424	-0.627438	-0.62741	0.16932	0.183288	0.148224	0.111773	0.21683
ENSG00000268240.1	ENSG00000268240	19:21600244:A:C	2.71688e-05	2.71575e-05	3.03756e-05	2.27454e-05	2.46865e-05	19:21600244:A:C-ENSG00000268240.1	0.483922	0.483987	0.484041	0.484199	0.484154	0.174373	0.183891	0.166479	0.146328	0.177511
ENSG00000268555.2	ENSG00000268555	19:21587341:C:A	8.86086e-11	1.07142e-10	7.68028e-11	4.21365e-09	1.3119e-09	19:21587341:C:A-ENSG00000268555.2	-0.773101	-0.773102	-0.773104	-0.773105	-0.773105	0.191445	0.190191	0.150085	0.227624	0.200899
ENSG00000268797.1	ENSG00000268797	19:40812994:T:A	0.00703231	0.00798441	0.00871137	0.00603163	0.00832195	19:40812994:T:A-ENSG00000268797.1	0.333955	0.333536	0.333429	0.335382	0.333696	0.175167	0.1792	0.174577	0.160381	0.181573
ENSG00000268858.2	ENSG00000268858	20:63861080:C:A	2.24899e-06	3.02493e-06	1.24348e-06	7.27584e-07	2.48241e-06	20:63861080:C:A-ENSG00000268858.2	-0.591399	-0.591421	-0.591473	-0.591522	-0.591464	0.188062	0.241369	0.173318	0.176988	0.160694
ENSG00000268870.1	ENSG00000268870	19:12430400:G:T	0.0158021	0.0215563	0.0122516	0.0163056	0.0215452	19:12430400:G:T-ENSG00000268870.1	-0.306338	-0.304308	-0.310307	-0.306815	-0.3046	0.148391	0.236837	0.165346	0.182768	0.205769
ENSG00000268903.1	ENSG00000268903	1:92742:G:A	0.000732378	0.000795964	0.000702414	0.000694017	0.000790723	1:92742:G:A-ENSG00000268903.1	0.538779	0.538778	0.538927	0.538952	0.538865	0.272277	0.345044	0.186414	0.201641	0.27307
ENSG00000268912.1	ENSG00000268912	19:58407038:A:G	0.0541336	0.0397142	0.0367359	0.0402831	0.0479125	19:58407038:A:G-ENSG00000268912.1	-0.303062	-0.309969	-0.312165	-0.308631	-0.30482	0.244342	0.237228	0.197838	0.219453	0.217806
ENSG00000269194.1	ENSG00000269194	19:49810679:C:CA	0.025835	0.0253948	0.0215483	0.0239544	0.0224232	19:49810679:C:CA-ENSG00000269194.1	-0.335751	-0.336175	-0.337872	-0.336599	-0.33698	0.215806	0.226037	0.181808	0.227747	0.237921
ENSG00000269237.1	ENSG00000269237	19:21415360:C:T	1.4988e-14	4.75286e-13	1.36602e-10	2.54662e-11	0	19:21415360:C:T-ENSG00000269237.1	-0.729903	-0.729903	-0.729904	-0.729906	-0.729906	0.13886	0.142909	0.152994	0.158134	0.107398
ENSG00000269514.3	ENSG00000269514	12:48225261:G:A	0.0653882	0.0416151	0.0841226	0.0752049	0.04973	12:48225261:G:A-ENSG00000269514.3	0.343424	0.362252	0.3367	0.340233	0.353056	0.307236	0.271262	0.248935	0.245264	0.272155
ENSG00000269934.3	ENSG00000269934	1:228238610:ACG:A	0.685746	0.805174	0.766594	0.0107074	0.710818	1:228238610:ACG:A-ENSG00000269934.3	-0.0558911	-0.00922591	-0.023813	-0.542075	-0.0444375	0.182414	0.194923	0.214867	0.165539	0.180942
ENSG00000269949.1	ENSG00000269949	4:56935539:A:G	0.00360735	0.00382386	0.00373028	0.00379835	0.00400154	4:56935539:A:G-ENSG00000269949.1	-0.510651	-0.51062	-0.510854	-0.510804	-0.510651	0.240023	0.268492	0.223179	0.289093	0.275495
ENSG00000269968.1	ENSG00000269968	12:6547542:A:C	0.0760569	0.00938416	0.233945	0.000927075	0.163933	12:6547542:A:C-ENSG00000269968.1	-0.201445	-0.306451	0.0830345	0.375925	-0.126517	0.171147	0.1101	0.132684	0.114099	0.153454
ENSG00000269981.1	ENSG00000269981	1:108030:G:T	0.000290485	0.000456357	0.000371168	0.000390716	0.000426858	1:108030:G:T-ENSG00000269981.1	0.613546	0.613436	0.613568	0.613543	0.613515	0.233353	0.360024	0.243103	0.241702	0.254122
ENSG00000270127.2	ENSG00000270127	15:100568336:A:G	5.61246e-11	3.99899e-10	1.52252e-08	8.41007e-09	2.48467e-08	15:100568336:A:G-ENSG00000270127.2	0.604342	0.604341	0.60435	0.604363	0.604361	0.127027	0.12532	0.151361	0.16032	0.167494
ENSG00000270149.5	ENSG00000270149	1:161059338:T:TG	0.021724	0.00432587	0.20004	0.0268846	0.116502	1:161059338:T:TG-ENSG00000270149.5	0.312941	0.370963	0.22421	0.311282	0.256637	0.157627	0.160988	0.181968	0.18079	0.178831
ENSG00000270210.1	ENSG00000270210	2:28426676:A:T	0.00624698	0.0069715	0.00474581	0.00557268	0.00475592	2:28426676:A:T-ENSG00000270210.1	-0.337348	-0.337244	-0.338928	-0.338119	-0.338725	0.161032	0.205844	0.149344	0.166045	0.195706
ENSG00000270393.1	ENSG00000270393	22:19039100:A:G	5.44692e-05	4.39812e-05	4.04446e-05	3.07789e-05	3.75477e-05	22:19039100:A:G-ENSG00000270393.1	-0.504703	-0.504809	-0.504911	-0.505056	-0.504982	0.181688	0.191108	0.17378	0.159739	0.195546
ENSG00000270972.1	ENSG00000270972	11:324699:C:T	1.15704e-11	1.39873e-17	2.64812e-11	2.38019e-12	1.86904e-13	11:324699:C:T-ENSG00000270972.1	0.711427	0.71143	0.711432	0.711434	0.711434	0.145152	0.100314	0.170988	0.153818	0.134256
ENSG00000271553.1	ENSG00000271553	7:128644066:C:T	0.0238528	0.000442556	0.000840727	0.0210065	0.00375653	7:128644066:C:T-ENSG00000271553.1	0.533486	0.555754	0.554584	0.534969	0.544746	0.255364	0.197633	0.22199	0.277018	0.239161
ENSG00000271631.1	ENSG00000271631	9:112871199:C:T	0.0790863	0.0278725	0.0888535	0.0845437	0.0668833	9:112871199:C:T-ENSG00000271631.1	0.231636	0.250344	0.230288	0.231713	0.235854	0.211905	0.134886	0.176491	0.213513	0.174117
ENSG00000271717.1	ENSG00000271717	19:8259940:T:C	0.0359864	0.0376967	0.0389678	0.0194894	0.0416523	19:8259940:T:C-ENSG00000271717.1	-0.28953	-0.28926	-0.288692	-0.298475	-0.287667	0.184874	0.223676	0.192042	0.148061	0.253294
ENSG00000271780.2	ENSG00000271780	14:101942021:C:T	0.0560532	0.0472907	0.0554746	0.0562208	0.0488456	14:101942021:C:T-ENSG00000271780.2	0.526453	0.531037	0.527635	0.526899	0.528931	0.4506	0.452616	0.517002	0.482957	0.398904
ENSG00000271862.1	ENSG00000271862	5:83034532:C:A	0.0602754	0.0510551	0.0650287	0.062948	0.0418778	5:83034532:C:A-ENSG00000271862.1	0.303349	0.307859	0.302495	0.303115	0.309771	0.262559	0.230032	0.239648	0.263406	0.19546
ENSG00000272004.1	ENSG00000272004	1:1659060:G:A	4.7154e-06	0.000197138	0.000399545	0.00220843	0.00208928	1:1659060:G:A-ENSG00000272004.1	-0.52621	-0.524112	-0.523433	-0.52198	-0.522058	0.158627	0.159255	0.180494	0.18086	0.186986
ENSG00000272010.1	ENSG00000272010	8:65602730:T:C	0.134126	0.0358473	0.0921475	0.0733524	0.204412	8:65602730:T:C-ENSG00000272010.1	-0.176513	-0.241442	-0.195214	-0.212275	-0.150499	0.160375	0.152125	0.16454	0.157098	0.162354
ENSG00000272079.2	ENSG00000272079	16:3006461:T:A	0.129881	0.136423	0.121798	0.130307	0.0142561	16:3006461:T:A-ENSG00000272079.2	0.220366	0.218605	0.224272	0.220685	0.264577	0.181421	0.148136	0.182949	0.19709	0.13258
ENSG00000272106.1	ENSG00000272106	1:1624323:AT:A	0.032709	0.397821	0.335311	0.559596	0.586158	1:1624323:AT:A-ENSG00000272106.1	-0.426009	0.106437	0.165659	0.0284543	-0.0207691	0.174091	0.177021	0.181837	0.179421	0.178652
ENSG00000272109.2	ENSG00000272109	5:96778846:G:A	7.46909e-05	4.65216e-09	5.94748e-07	2.30531e-05	4.15487e-06	5:96778846:G:A-ENSG00000272109.2	-0.581625	-0.581827	-0.581818	-0.581733	-0.581772	0.197941	0.117216	0.155164	0.183584	0.164712
ENSG00000272183.1	ENSG00000272183	2:74502354:T:C	0.00215704	0.00180149	0.0017296	0.00218518	0.00203275	2:74502354:T:C-ENSG00000272183.1	0.481224	0.481591	0.481899	0.481457	0.481477	0.237758	0.218462	0.206969	0.262557	0.200638
ENSG00000272275.1	ENSG00000272275	2:10786912:C:T	0.0438463	0.0744418	0.0704676	0.142121	0.0256585	2:10786912:C:T-ENSG00000272275.1	-0.270592	-0.249739	-0.251954	-0.220514	-0.283437	0.182775	0.1984	0.190598	0.205161	0.156617
ENSG00000272277.1	ENSG00000272277	6:3026992:C:T	0.00040082	0.000139095	0.000378644	0.000185783	7.59367e-09	6:3026992:C:T-ENSG00000272277.1	-0.632245	-0.63276	-0.632373	-0.632702	-0.634044	0.17215	0.16012	0.199472	0.198745	0.148126
ENSG00000272279.1	ENSG00000272279	6:1523737:C:T	0.0138668	0.020374	0.0253658	0.02241	0.0226379	6:1523737:C:T-ENSG00000272279.1	0.288831	0.286436	0.28552	0.286785	0.286522	0.166349	0.155138	0.191935	0.16893	0.185475
ENSG00000272305.5	ENSG00000272305	3:53091906:T:C	5.59544e-17	4.77042e-15	8.34437e-18	1.44158e-15	1.27023e-12	3:53091906:T:C-ENSG00000272305.5	1.0478	1.0478	1.0478	1.0478	1.0478	0.175604	0.195491	0.165015	0.175044	0.216198
ENSG00000272316.1	ENSG00000272316	6:57911448:A:G	0.0424817	0.446926	0.411181	0.346739	0.363658	6:57911448:A:G-ENSG00000272316.1	0.242703	-0.0869632	0.051239	0.0725655	0.106489	0.112128	0.134997	0.138102	0.133688	0.150787
ENSG00000272382.1	ENSG00000272382	5:42990476:C:G	0.0107856	0.0320715	0.031779	0.0325349	0.0328067	5:42990476:C:G-ENSG00000272382.1	-0.295956	-0.288612	-0.289823	-0.289386	-0.289356	0.14185	0.177271	0.192916	0.185215	0.177665
ENSG00000272410.5	ENSG00000272410	3:10209656:C:G	0.0395171	0.035861	0.0407582	0.0436225	0.0400806	3:10209656:C:G-ENSG00000272410.5	0.417872	0.419352	0.418489	0.417028	0.417883	0.346551	0.251358	0.282998	0.374226	0.341023
ENSG00000272447.1	ENSG00000272447	10:79832124:C:T	0.00279002	0.00622926	0.00649784	0.0057171	0.00586371	10:79832124:C:T-ENSG00000272447.1	0.395486	0.393686	0.393881	0.39452	0.394379	0.17624	0.184335	0.189939	0.192483	0.21192
ENSG00000272501.1	ENSG00000272501	6:31148962:A:G	1.11022e-16	1.11022e-16	1.11022e-16	1.11022e-16	1.11022e-16	6:31148962:A:G-ENSG00000272501.1	-1.03992	-1.03992	-1.03992	-1.03992	-1.03992	0.173338	0.152802	0.16352	0.166767	0.15673
ENSG00000272509.1	ENSG00000272509	8:94925449:A:G	0.195678	0.0243131	0.104659	0.0802958	0.00819677	8:94925449:A:G-ENSG00000272509.1	0.140326	0.353531	-0.193372	0.225403	-0.404734	0.209542	0.178332	0.187991	0.193092	0.161698
ENSG00000272512.1	ENSG00000272512	1:1029460:T:C	1.52474e-05	2.24223e-05	2.84113e-05	3.12328e-05	2.93789e-05	1:1029460:T:C-ENSG00000272512.1	0.682482	0.682476	0.682487	0.682489	0.68249	0.216682	0.228359	0.30216	0.269114	0.238799
ENSG00000272555.1	ENSG00000272555	2:218810344:G:T	0.000775635	0.000753109	0.00061687	0.0007866	0.000731551	2:218810344:G:T-ENSG00000272555.1	0.512379	0.512425	0.512747	0.512536	0.512599	0.253257	0.193232	0.19282	0.218135	0.272788
ENSG00000272572.1	ENSG00000272572	10:100913306:G:T	0.0191548	0.0198721	0.01968	0.0192522	0.017795	10:100913306:G:T-ENSG00000272572.1	0.295536	0.295481	0.295946	0.296025	0.296348	0.178843	0.178868	0.1876	0.175204	0.191008
ENSG00000272604.1	ENSG00000272604	7:105567573:C:CAA	0.0600029	0.0528053	0.0544702	0.0525378	0.0499351	7:105567573:C:CAA-ENSG00000272604.1	0.310062	0.312965	0.312225	0.312694	0.312717	0.26271	0.246818	0.228779	0.252125	0.236335
ENSG00000272630.1	ENSG00000272630	10:73087686:T:C	0.458193	0.511942	0.00921779	0.623959	0.358192	10:73087686:T:C-ENSG00000272630.1	0.0732176	-0.0536335	0.561945	-0.000671428	0.125679	0.177852	0.226077	0.178566	0.244491	0.189261
ENSG00000272632.1	ENSG00000272632	4:141431215:C:A	0.00650985	0.00560682	0.00663489	0.00646588	0.00705893	4:141431215:C:A-ENSG00000272632.1	0.355855	0.356534	0.356324	0.356518	0.356039	0.183297	0.179984	0.164103	0.194349	0.20532
ENSG00000272667.1	ENSG00000272667	2:127871978:A:C	0.0451371	0.136669	0.102177	0.220572	0.176913	2:127871978:A:C-ENSG00000272667.1	-0.23771	-0.185585	-0.215229	-0.156058	-0.174108	0.150245	0.193821	0.167955	0.196888	0.21702
ENSG00000272668.2	ENSG00000272668	1:159852190:T:TAC	0.00104579	0.00100959	0.00100436	0.000979846	0.000889764	1:159852190:T:TAC-ENSG00000272668.2	0.695444	0.695485	0.69552	0.695537	0.695564	0.328447	0.299568	0.326397	0.322854	0.347033
ENSG00000272688.2	ENSG00000272688	18:3252901:A:G	3.41544e-05	1.9529e-05	3.27095e-05	3.58644e-05	3.45598e-05	18:3252901:A:G-ENSG00000272688.2	0.530626	0.530738	0.530753	0.530756	0.530775	0.186395	0.165016	0.190938	0.178991	0.215433
ENSG00000272733.1	ENSG00000272733	22:23631680:G:GC	7.33931e-05	0.000130382	9.32718e-05	0.000101823	7.10816e-05	22:23631680:G:GC-ENSG00000272733.1	0.475437	0.475366	0.475593	0.475587	0.475693	0.147	0.221082	0.20024	0.183888	0.160144
ENSG00000272750.1	ENSG00000272750	1:222652375:T:C	1.19153e-06	1.18571e-07	4.30389e-09	2.93205e-07	1.43943e-08	1:222652375:T:C-ENSG00000272750.1	-0.667143	-0.667155	-0.667184	-0.667175	-0.667183	0.209875	0.180547	0.14956	0.200812	0.163235
ENSG00000272763.1	ENSG00000272763	17:48656306:G:C	0.0415496	0.039039	0.0488784	0.0460284	0.0492113	17:48656306:G:C-ENSG00000272763.1	0.294392	0.295444	0.293404	0.294272	0.292701	0.206836	0.19763	0.218728	0.218413	0.240823
ENSG00000272799.1	ENSG00000272799	18:9918028:C:G	0.00776324	0.0145404	0.0153351	0.0137077	0.014439	18:9918028:C:G-ENSG00000272799.1	0.319322	0.31683	0.317101	0.317975	0.317556	0.148922	0.178997	0.208077	0.168729	0.187585
ENSG00000272810.1	ENSG00000272810	6:25963914:A:AAACAACAAC	0.0228291	0.0225352	0.0227438	0.0217734	0.015417	6:25963914:A:AAACAACAAC-ENSG00000272810.1	-0.316601	-0.316983	-0.316986	-0.317467	-0.319019	0.191536	0.205944	0.199937	0.236125	0.164658
ENSG00000272825.1	ENSG00000272825	21:44972960:G:GTCAGGCAGT	0.0666839	0.000285019	0.0696155	0.068057	0.0617949	21:44972960:G:GTCAGGCAGT-ENSG00000272825.1	-0.32555	-0.357527	-0.324636	-0.325593	-0.328004	0.184469	0.105536	0.148447	0.170571	0.182032
ENSG00000272831.2	ENSG00000272831	7:66695963:CA:C	6.90194e-09	1.39683e-05	3.73349e-06	9.74736e-06	9.38459e-07	7:66695963:CA:C-ENSG00000272831.2	0.524085	0.523969	0.524069	0.524087	0.524173	0.102376	0.159156	0.156152	0.17666	0.150973
ENSG00000272864.1	ENSG00000272864	1:74708461:T:G	0.0409018	0.0384602	0.0276483	0.0354485	0.0276466	1:74708461:T:G-ENSG00000272864.1	-0.276877	-0.278141	-0.282682	-0.278605	-0.281221	0.216308	0.20717	0.159823	0.217723	0.173247
ENSG00000272871.1	ENSG00000272871	9:14612190:T:G	1.24834e-05	3.32505e-06	1.64367e-05	1.02443e-05	3.62572e-06	9:14612190:T:G-ENSG00000272871.1	0.478768	0.478933	0.478908	0.478974	0.4791	0.178528	0.126243	0.176921	0.155149	0.143792
ENSG00000272896.1	ENSG00000272896	9:136800117:A:C	0.000514909	0.000930789	0.0010541	0.000923436	0.000912495	9:136800117:A:C-ENSG00000272896.1	0.436729	0.43648	0.436516	0.43675	0.436767	0.156425	0.217604	0.181046	0.175059	0.203753
ENSG00000272908.1	ENSG00000272908	7:38338253:C:T	0.0115076	0.00911502	0.00992894	0.0109065	0.0103238	7:38338253:C:T-ENSG00000272908.1	-0.432115	-0.433582	-0.43343	-0.432734	-0.432803	0.222681	0.249162	0.21796	0.281766	0.244136
ENSG00000272911.1	ENSG00000272911	17:2688737:G:A	0.00346245	0.000979323	0.00342869	0.00382027	0.00380277	17:2688737:G:A-ENSG00000272911.1	-0.416291	-0.41878	-0.416817	-0.416553	-0.416434	0.169267	0.182638	0.19779	0.202353	0.173196
ENSG00000272936.1	ENSG00000272936	4:44704902:C:T	2.45466e-07	8.6237e-07	8.12552e-06	7.47563e-07	1.36475e-06	4:44704902:C:T-ENSG00000272936.1	0.49931	0.499256	0.499291	0.499371	0.499419	0.148823	0.132167	0.169944	0.119953	0.231014
ENSG00000272941.1	ENSG00000272941	7:135155451:C:T	4.10542e-07	0.000443146	0.000399611	0.000457353	0.000403443	7:135155451:C:T-ENSG00000272941.1	-0.209372	-0.208725	-0.209328	-0.209045	-0.209116	0.0419411	0.105523	0.0938755	0.096779	0.0765964
ENSG00000272979.1	ENSG00000272979	2:190501853:T:G	0.020438	0.0231604	0.0203974	0.0231911	0.023747	2:190501853:T:G-ENSG00000272979.1	-0.321057	-0.320262	-0.322169	-0.320691	-0.320311	0.181938	0.22305	0.177838	0.277798	0.196453
ENSG00000273014.1	ENSG00000273014	7:32754051:C:T	0.0128464	0.0122837	0.00461084	0.0111366	0.01039	7:32754051:C:T-ENSG00000273014.1	0.501034	0.501372	0.507777	0.501933	0.502287	0.301874	0.27956	0.210184	0.286725	0.276886
ENSG00000273080.2	ENSG00000273080	2:86154373:G:A	0.0172594	0.0225332	0.0036512	0.0272036	0.0248336	2:86154373:G:A-ENSG00000273080.2	0.341773	0.339399	0.355526	0.337712	0.338604	0.15427	0.205158	0.149962	0.199515	0.189008
ENSG00000273112.1	ENSG00000273112	1:161529927:T:TAA	0.000222738	0.000203319	0.000316786	0.000179779	0.000266537	1:161529927:T:TAA-ENSG00000273112.1	0.603906	0.603967	0.603896	0.6041	0.603966	0.236787	0.226253	0.236987	0.225068	0.304772
ENSG00000273133.1	ENSG00000273133	4:15598222:C:T	0.000536574	0.000189228	0.000574398	0.00139273	0.00171739	4:15598222:C:T-ENSG00000273133.1	-0.347131	-0.349215	-0.348484	-0.347472	-0.347291	0.0967955	0.150045	0.161168	0.183172	0.185126
ENSG00000273165.1	ENSG00000273165	2:31839405:A:AT	0.156688	0.184278	0.221308	0.206569	0.0458426	2:31839405:A:AT-ENSG00000273165.1	0.108297	-0.109618	-0.150509	-0.107514	0.320983	0.157174	0.15562	0.170015	0.166887	0.136452
ENSG00000273240.1	ENSG00000273240	2:189747977:C:T	0.0187252	0.0177603	0.0157337	0.00453844	0.0139259	2:189747977:C:T-ENSG00000273240.1	0.331055	0.331492	0.332498	0.340574	0.333802	0.205615	0.163309	0.177517	0.150655	0.181799
ENSG00000273270.1	ENSG00000273270	7:128527825:C:T	0.00177652	0.00182772	0.00166014	0.00135951	0.00159021	7:128527825:C:T-ENSG00000273270.1	-0.505486	-0.505526	-0.505714	-0.506021	-0.505777	0.233342	0.245137	0.227171	0.203358	0.25212
ENSG00000273272.2	ENSG00000273272	22:50541317:AT:A	5.31934e-08	2.01763e-07	2.18865e-05	3.94537e-06	3.71766e-06	22:50541317:AT:A-ENSG00000273272.2	0.492097	0.492112	0.492073	0.492152	0.492158	0.109422	0.113552	0.186178	0.163267	0.16792
ENSG00000273275.1	ENSG00000273275	2:68165363:C:A	0.319849	0.554866	0.395005	0.355491	0.0331487	2:68165363:C:A-ENSG00000273275.1	0.187026	0.0292731	-0.099013	0.156959	-0.543101	0.250946	0.260693	0.222627	0.274678	0.22169
ENSG00000273355.2	ENSG00000273355	18:813221:C:T	0.0297993	0.0335017	0.030579	0.0301031	0.0249038	18:813221:C:T-ENSG00000273355.2	0.298569	0.297535	0.298697	0.298702	0.300021	0.203437	0.263045	0.210584	0.183949	0.170799
ENSG00000273424.1	ENSG00000273424	22:41448782:G:T	0.486421	0.534679	0.365695	0.468024	0.0448343	22:41448782:G:T-ENSG00000273424.1	0.0340514	-0.0248885	-0.146873	-0.0554948	0.37883	0.182587	0.178961	0.169597	0.171766	0.162086
ENSG00000273445.1	ENSG00000273445	2:87480228:T:C	9.54036e-11	4.54081e-14	2.39248e-11	2.87701e-11	3.4861e-14	2:87480228:T:C-ENSG00000273445.1	-0.813559	-0.81356	-0.81356	-0.81356	-0.813561	0.165601	0.16398	0.164374	0.187831	0.14791
ENSG00000273449.1	ENSG00000273449	4:163537149:G:GT	0.0133115	3.39736e-07	0.0155565	0.00129546	0.000556928	4:163537149:G:GT-ENSG00000273449.1	-0.505787	-0.527711	-0.505112	-0.51492	-0.519543	0.172326	0.121236	0.179612	0.167203	0.171128
ENSG00000273619.2	ENSG00000273619	20:62385155:G:A	0.504644	0.0145077	0.444287	0.26986	0.202651	20:62385155:G:A-ENSG00000273619.2	-0.0580061	-0.403087	-0.100244	-0.182095	-0.190758	0.213647	0.168326	0.195183	0.218872	0.235734
ENSG00000273654.1	ENSG00000273654	19:18056447:T:C	0.517913	0.00420429	0.361588	0.0894001	0.156887	19:18056447:T:C-ENSG00000273654.1	0.00645139	0.488022	0.0698027	-0.261224	-0.182851	0.184896	0.154848	0.199676	0.161336	0.185044
ENSG00000273734.1	ENSG00000273734	19:2259165:C:T	0.000775892	0.000611422	1.04416e-05	0.000401459	0.000583529	19:2259165:C:T-ENSG00000273734.1	-0.441778	-0.441996	-0.4435	-0.442525	-0.442295	0.168564	0.169803	0.117054	0.15367	0.164732
ENSG00000273784.5	ENSG00000273784	13:52641633:C:T	0.0308665	0.0296685	0.0232939	0.0238869	0.0232294	13:52641633:C:T-ENSG00000273784.5	0.367673	0.368487	0.370808	0.370146	0.370158	0.258231	0.253776	0.208209	0.221369	0.281385
ENSG00000273972.1	ENSG00000273972	15:45702348:C:G	2.5257e-05	0.000108198	2.39954e-05	1.61111e-05	0.000103602	15:45702348:C:G-ENSG00000273972.1	-0.484444	-0.484301	-0.484666	-0.484838	-0.484534	0.157513	0.165717	0.163178	0.154351	0.197685
ENSG00000274256.1	ENSG00000274256	6:41217867:C:A	0	0	0	0	0	6:41217867:C:A-ENSG00000274256.1	-0.762689	-0.762689	-0.76269	-0.76269	-0.76269	0.0822653	0.0890864	0.0687819	0.0920692	0.0670136
ENSG00000274341.1	ENSG00000274341	17:32374860:C:T	0.680567	0.657272	0.676267	0.403865	0.000765931	17:32374860:C:T-ENSG00000274341.1	0.0221147	0.00551341	0.0145925	0.188851	0.655453	0.234831	0.258041	0.242648	0.224526	0.173701
ENSG00000274383.1	ENSG00000274383	15:64951676:CCTT:C	0.00150962	0.0884927	0.0947212	0.11464	0.176574	15:64951676:CCTT:C-ENSG00000274383.1	0.281438	0.209977	0.198518	0.195701	0.174552	0.124313	0.113827	0.0814494	0.140152	0.170011
ENSG00000274422.1	ENSG00000274422	22:22312845:GGTGTGTGTG:G	0.0942047	0.0801208	0.00706002	0.0628663	0.0631766	22:22312845:GGTGTGTGTG:G-ENSG00000274422.1	-0.178072	-0.182913	-0.220872	-0.191387	-0.189666	0.104475	0.12437	0.100752	0.142103	0.12248
ENSG00000274717.1	ENSG00000274717	22:42790027:T:A	0.00471744	0.00323121	0.00557318	0.00636628	0.00589261	22:42790027:T:A-ENSG00000274717.1	0.42377	0.424966	0.423738	0.42328	0.423551	0.200347	0.20181	0.204663	0.185137	0.280665
ENSG00000274767.1	ENSG00000274767	17:36195375:A:G	3.10733e-11	2.95381e-12	5.04775e-14	1.26091e-14	1.29318e-12	17:36195375:A:G-ENSG00000274767.1	1.1681	1.1681	1.1681	1.1681	1.1681	0.271893	0.247748	0.2412	0.214369	0.246721
ENSG00000274922.3	ENSG00000274922	13:112691481:A:G	0.391022	0.00739068	0.510869	0.581551	0.428403	13:112691481:A:G-ENSG00000274922.3	0.120997	-0.564646	0.0234834	-0.0356701	-0.0719572	0.220203	0.189854	0.23527	0.261206	0.396154
ENSG00000274949.1	ENSG00000274949	20:3806184:A:G	0.434147	0.583258	0.0228246	0.563209	0.637619	20:3806184:A:G-ENSG00000274949.1	0.082565	0.0295114	0.432932	-0.0518131	0.0120289	0.140499	0.155103	0.147766	0.189346	0.166125
ENSG00000274979.1	ENSG00000274979	12:69326911:T:G	0.000287484	0.000287066	0.000239929	0.000229113	0.000170532	12:69326911:T:G-ENSG00000274979.1	-0.485214	-0.485273	-0.485502	-0.485585	-0.485652	0.195752	0.188962	0.196196	0.191698	0.176764
ENSG00000275367.1	ENSG00000275367	12:8244831:G:A	0.0547262	0.311071	0.0269454	0.176824	0.132427	12:8244831:G:A-ENSG00000275367.1	0.398902	0.21604	0.48816	0.306782	0.333509	0.311298	0.348323	0.259791	0.363851	0.377474
ENSG00000275413.1	ENSG00000275413	17:15981247:C:T	0.0572356	0.0580631	0.000754593	0.151978	0.00992925	17:15981247:C:T-ENSG00000275413.1	-0.164141	0.176546	0.409049	0.128409	-0.381628	0.171534	0.18998	0.144707	0.187775	0.155601
ENSG00000275418.1	ENSG00000275418	18:58688301:T:TAC	0.528621	0.0204241	0.316704	0.543844	0.420961	18:58688301:T:TAC-ENSG00000275418.1	-0.032628	0.341116	0.145812	0.0281325	-0.0936785	0.16278	0.123651	0.185116	0.187413	0.165487
ENSG00000275476.1	ENSG00000275476	12:29277442:T:A	0.000315852	0.000605604	0.000615629	0.000618945	0.000595488	12:29277442:T:A-ENSG00000275476.1	0.44064	0.440396	0.440565	0.44063	0.440611	0.170821	0.196714	0.178153	0.195037	0.15865
ENSG00000275649.1	ENSG00000275649	9:42275628:C:T	2.28148e-09	7.18395e-09	2.01608e-08	1.30598e-08	6.53898e-09	9:42275628:C:T-ENSG00000275649.1	0.750926	0.750927	0.75093	0.750933	0.750933	0.162221	0.193642	0.226424	0.240535	0.208453
ENSG00000275709.1	ENSG00000275709	15:45593304:C:T	0.0185645	0.00377797	0.0476974	0.116643	0.0570333	15:45593304:C:T-ENSG00000275709.1	0.401425	-0.613705	0.178667	0.143245	-0.160229	0.237841	0.229899	0.277956	0.24961	0.268127
ENSG00000275719.1	ENSG00000275719	19:46835468:TC:T	0.45566	0.202039	0.000600114	0.315221	0.44054	19:46835468:TC:T-ENSG00000275719.1	-0.0524679	0.194753	-0.60607	0.131965	0.0608359	0.214112	0.165725	0.161101	0.245956	0.22717
ENSG00000275993.4	ENSG00000275993	21:6124826:A:C	0.0209244	0.0213542	0.0201165	0.0204867	0.0192501	21:6124826:A:C-ENSG00000275993.4	-0.348372	-0.348393	-0.349106	-0.348841	-0.349098	0.23108	0.206288	0.194212	0.223258	0.239684
ENSG00000276136.1	ENSG00000276136	12:31965889:C:CA	0.0151105	0.0226225	0.0291453	0.0290397	0.0264463	12:31965889:C:CA-ENSG00000276136.1	0.251067	0.24888	0.247712	0.247811	0.248631	0.134756	0.166089	0.151451	0.165608	0.152973
ENSG00000276250.1	ENSG00000276250	17:30786697:A:AATCT	0.440323	0.0196495	0.500155	0.475645	0.417221	17:30786697:A:AATCT-ENSG00000276250.1	-0.0825655	-0.509213	0.0572129	-0.067743	-0.0961831	0.219963	0.198529	0.225561	0.184316	0.264474
ENSG00000276449.1	ENSG00000276449	19:57411542:C:T	0.00822927	0.00831019	0.0038966	0.00732216	0.0077147	19:57411542:C:T-ENSG00000276449.1	0.416414	0.416547	0.420423	0.417079	0.416994	0.208772	0.234933	0.192448	0.184553	0.245596
ENSG00000276791.1	ENSG00000276791	16:2778156:G:C	1.48819e-07	2.77555e-07	3.35335e-08	9.23005e-10	2.28051e-07	16:2778156:G:C-ENSG00000276791.1	0.582176	0.582176	0.582239	0.58231	0.582243	0.161404	0.140057	0.142778	0.142385	0.147198
ENSG00000276900.1	ENSG00000276900	12:31730302:A:G	2.9465e-07	2.27541e-07	2.70649e-07	4.13535e-07	3.82723e-07	12:31730302:A:G-ENSG00000276900.1	0.705126	0.705132	0.705143	0.705144	0.705145	0.225799	0.171639	0.207096	0.239045	0.258488
ENSG00000276968.1	ENSG00000276968	13:48041299:T:C	0.000958846	0.00106204	0.00101125	0.00108435	0.000542288	13:48041299:T:C-ENSG00000276968.1	0.559555	0.559508	0.559627	0.559602	0.55995	0.255272	0.239393	0.253876	0.276944	0.204352
ENSG00000277301.1	ENSG00000277301	20:32465980:C:CT	0.00049247	0.000442906	0.00050742	0.000459838	0.000469303	20:32465980:C:CT-ENSG00000277301.1	-0.615738	-0.615828	-0.615815	-0.615894	-0.615861	0.219228	0.268921	0.252041	0.286451	0.352145
ENSG00000277763.1	ENSG00000277763	14:56112444:A:G	0.000586906	0.0788769	0.149682	0.0732793	0.196231	14:56112444:A:G-ENSG00000277763.1	-0.441439	-0.327499	-0.28841	-0.332756	-0.271441	0.148973	0.187704	0.188052	0.169689	0.166007
ENSG00000277879.1	ENSG00000277879	10:117286219:C:G	0.000592094	0.000288958	0.000675047	0.000462125	0.000608376	10:117286219:C:G-ENSG00000277879.1	0.601761	0.602081	0.601789	0.602018	0.601839	0.289981	0.199892	0.275613	0.259676	0.266717
ENSG00000278376.2	ENSG00000278376	11:118748128:A:C	0.0130306	0.0178989	0.0200162	0.0198635	0.0187733	11:118748128:A:C-ENSG00000278376.2	-0.439187	-0.437312	-0.437114	-0.437127	-0.437417	0.245899	0.269394	0.276975	0.299408	0.231164
ENSG00000278740.1	ENSG00000278740	17:68182440:T:C	0.00137684	0.00336532	0.00505287	0.00338589	0.0031293	17:68182440:T:C-ENSG00000278740.1	0.614587	0.612938	0.612193	0.613126	0.613301	0.234558	0.30713	0.337877	0.319381	0.308866
ENSG00000278745.1	ENSG00000278745	6:41217867:C:A	0	0	0	0	0	6:41217867:C:A-ENSG00000278745.1	-0.775072	-0.775073	-0.775073	-0.775073	-0.775073	0.0872432	0.0943592	0.0752744	0.0943815	0.0729919
ENSG00000278869.2	ENSG00000278869	22:49900730:G:A	0.0208425	0.01554	0.0188408	0.0155118	0.0165909	22:49900730:G:A-ENSG00000278869.2	-0.389011	-0.391764	-0.390129	-0.392312	-0.390965	0.228567	0.202634	0.226688	0.2372	0.30644
ENSG00000279140.1	ENSG00000279140	14:104832976:CA:C	0.148489	0.260097	0.0275927	0.317484	0.311448	14:104832976:CA:C-ENSG00000279140.1	0.198115	-0.117406	0.372888	-0.0923723	-0.102361	0.189705	0.170013	0.137723	0.183283	0.21248
ENSG00000279254.1	ENSG00000279254	2:46631182:G:C	2.36169e-06	2.43602e-06	3.3304e-05	6.20005e-07	6.50089e-06	2:46631182:G:C-ENSG00000279254.1	-0.513913	-0.513946	-0.513915	-0.514147	-0.514007	0.16448	0.162685	0.175205	0.132278	0.151224
ENSG00000279259.1	ENSG00000279259	17:80148608:T:G	0.0349441	0.0339278	0.0314672	0.0329721	0.0314534	17:80148608:T:G-ENSG00000279259.1	0.287953	0.288571	0.289771	0.288922	0.28908	0.199049	0.192543	0.192476	0.222682	0.194524
ENSG00000279267.1	ENSG00000279267	2:113638251:C:T	3.34137e-08	2.65612e-07	9.38815e-08	2.02471e-07	1.98461e-09	2:113638251:C:T-ENSG00000279267.1	0.783661	0.783661	0.783665	0.783666	0.783671	0.195037	0.240099	0.241298	0.22914	0.17131
ENSG00000279277.2	ENSG00000279277	3:108074887:C:T	0.0371675	0.399739	0.469222	0.43476	0.466347	3:108074887:C:T-ENSG00000279277.2	-0.279446	-0.115987	-0.0980979	-0.109127	-0.0978928	0.160638	0.183309	0.168651	0.181229	0.234591
ENSG00000279320.1	ENSG00000279320	3:146518137:C:A	0.0382123	0.0387	0.0356127	0.0384819	0.0390079	3:146518137:C:A-ENSG00000279320.1	0.298397	0.298744	0.300727	0.29902	0.298541	0.157044	0.266756	0.221407	0.267238	0.26364
ENSG00000279369.1	ENSG00000279369	17:63685671:G:C	9.06354e-05	7.6749e-05	6.09192e-05	8.75713e-05	5.8031e-05	17:63685671:G:C-ENSG00000279369.1	-0.5841	-0.584141	-0.584246	-0.584193	-0.584233	0.285844	0.238194	0.198747	0.242556	0.178951
ENSG00000279447.1	ENSG00000279447	20:23039366:A:G	0.0010233	0.000945988	0.00123065	0.00112861	0.00101645	20:23039366:A:G-ENSG00000279447.1	0.270703	0.271196	0.270765	0.271347	0.271608	0.110519	0.119883	0.107641	0.119129	0.149273
ENSG00000279453.1	ENSG00000279453	6:122449634:G:A	0.0427514	0.0881791	0.0238688	0.0383964	0.0519621	6:122449634:G:A-ENSG00000279453.1	-0.433393	-0.407573	-0.461631	-0.435935	-0.42771	0.300051	0.339902	0.269856	0.301682	0.33217
ENSG00000279605.1	ENSG00000279605	8:143563290:A:G	0.0165502	0.0191689	0.0190011	0.0147218	0.0157358	8:143563290:A:G-ENSG00000279605.1	0.281931	0.281106	0.281287	0.28332	0.282517	0.173108	0.203893	0.187418	0.143776	0.158279
ENSG00000279722.1	ENSG00000279722	16:53441738:A:G	0.000127577	5.78571e-07	3.14673e-05	0.000100348	0.000376989	16:53441738:A:G-ENSG00000279722.1	0.522774	0.523453	0.523031	0.522917	0.522638	0.20747	0.139235	0.136049	0.188916	0.160966
ENSG00000279741.1	ENSG00000279741	16:53365674:G:T	0.000829068	0.00132209	0.00232236	0.00183268	0.00229063	16:53365674:G:T-ENSG00000279741.1	-0.315619	-0.315557	-0.314821	-0.31552	-0.315231	0.11488	0.143086	0.131027	0.135804	0.20033
ENSG00000279884.1	ENSG00000279884	2:174517657:T:TTTC	0.0689952	0.0807693	0.0455153	0.0866476	0.0783986	2:174517657:T:TTTC-ENSG00000279884.1	0.162025	0.157673	0.172078	0.156768	0.159068	0.15617	0.111164	0.114182	0.139425	0.155563
ENSG00000279942.1	ENSG00000279942	6:37560693:T:C	3.28216e-06	1.58871e-06	1.02538e-06	1.72041e-06	2.09574e-06	6:37560693:T:C-ENSG00000279942.1	0.566508	0.566554	0.566626	0.566626	0.566626	0.193499	0.181941	0.135913	0.193271	0.218376
ENSG00000280027.1	ENSG00000280027	16:53387327:G:A	7.67417e-09	4.09664e-07	3.15558e-08	9.12024e-09	1.39126e-07	16:53387327:G:A-ENSG00000280027.1	-0.534546	-0.53452	-0.534607	-0.534665	-0.534633	0.127034	0.153232	0.141137	0.124584	0.170239
ENSG00000280135.1	ENSG00000280135	6:107719242:G:A	0.00470392	0.00295719	0.00105906	0.00160106	0.00239259	6:107719242:G:A-ENSG00000280135.1	-0.418482	-0.419479	-0.421574	-0.420654	-0.419877	0.228619	0.241801	0.149851	0.167482	0.19641
ENSG00000280161.1	ENSG00000280161	5:180795229:A:G	0.00633192	0.00782031	0.00892701	0.00819818	0.00912941	5:180795229:A:G-ENSG00000280161.1	-0.562873	-0.562163	-0.561956	-0.562302	-0.561788	0.29571	0.302256	0.330677	0.279618	0.359864
ENSG00000281039.1	ENSG00000281039	7:30547716:C:T	0.00751481	0.800703	0.727548	0.764082	0.802807	7:30547716:C:T-ENSG00000281039.1	0.4187	-0.00189674	0.0296543	-0.014902	0.00289388	0.145707	0.185071	0.176407	0.202147	0.212779
ENSG00000281100.1	ENSG00000281100	3:36852776:TAAA:T	0.0130181	0.0105735	0.0111435	0.0154878	0.0127024	3:36852776:TAAA:T-ENSG00000281100.1	-0.334917	-0.336507	-0.337284	-0.334555	-0.335565	0.181854	0.165737	0.186076	0.224766	0.200937
ENSG00000281593.1	ENSG00000281593	7:30365172:T:G	0.0168139	0.0272993	0.0303728	0.0290282	0.0281016	7:30365172:T:G-ENSG00000281593.1	-0.583662	-0.577524	-0.576905	-0.577414	-0.577778	0.332113	0.401582	0.453744	0.389667	0.408768
ENSG00000281741.2	ENSG00000281741	1:120954666:G:A	2.38365e-13	6.03132e-11	1.68643e-13	1.82807e-09	3.23876e-10	1:120954666:G:A-ENSG00000281741.2	-1.03695	-1.03695	-1.03695	-1.03695	-1.03695	0.187775	0.230351	0.200117	0.27572	0.275142
ENSG00000282804.1	ENSG00000282804	6:24827684:C:T	0.0236517	0.0176133	0.0179891	0.0151523	0.0172182	6:24827684:C:T-ENSG00000282804.1	-0.196033	-0.198603	-0.198532	-0.199994	-0.198616	0.148202	0.10246	0.127118	0.113111	0.135983
ENSG00000282828.2	ENSG00000282828	2:49593070:T:C	0.0132178	0.0122775	0.0103769	0.0110732	0.0146811	2:49593070:T:C-ENSG00000282828.2	0.354752	0.355301	0.35668	0.356218	0.354288	0.218318	0.225979	0.157499	0.219699	0.211711
ENSG00000283155.1	ENSG00000283155	5:140569824:T:C	0.131814	0.116362	0.0845815	0.049381	0.0801632	5:140569824:T:C-ENSG00000283155.1	0.213181	0.221437	0.231048	0.252137	0.232312	0.297047	0.168343	0.2426	0.163075	0.242338
ENSG00000283352.1	ENSG00000283352	6:57946101:T:C	0.00690959	0.0074159	0.00658164	0.00496384	0.00626711	6:57946101:T:C-ENSG00000283352.1	0.471118	0.470988	0.471443	0.472709	0.471538	0.239566	0.258318	0.242831	0.253898	0.229491
ENSG00000283384.1	ENSG00000283384	13:108303116:C:G	0.00797837	0.00698915	0.00625119	0.00776452	0.00741641	13:108303116:C:G-ENSG00000283384.1	-0.355452	-0.356192	-0.357335	-0.356103	-0.356219	0.172755	0.16281	0.184396	0.214324	0.225458
ENSG00000283696.1	ENSG00000283696	1:161363768:A:G	0.00158757	0.00183628	0.00191369	0.00132055	0.00141246	1:161363768:A:G-ENSG00000283696.1	0.584291	0.584165	0.584189	0.584714	0.584499	0.26988	0.26007	0.336202	0.27097	0.245328
ENSG00000284057.1	ENSG00000284057	11:93743694:G:C	0.000111308	8.61905e-06	3.58037e-06	5.2262e-06	7.00593e-07	11:93743694:G:C-ENSG00000284057.1	-0.521972	-0.522126	-0.522341	-0.522337	-0.522445	0.197996	0.145705	0.177951	0.173025	0.134224
ENSG00000284526.1	ENSG00000284526	17:76564736:A:G	0.000804762	0.00129351	0.00113767	0.000980583	0.00163618	17:76564736:A:G-ENSG00000284526.1	0.706801	0.706336	0.706498	0.706723	0.706207	0.320716	0.31597	0.312018	0.328501	0.358548
ENSG00000284633.2	ENSG00000284633	22:39244698:C:T	2.09631e-07	2.53565e-09	3.3952e-10	5.51492e-10	1.45786e-09	22:39244698:C:T-ENSG00000284633.2	0.501846	0.501962	0.502088	0.502147	0.502142	0.125402	0.114357	0.109024	0.122622	0.131439
ENSG00000284685.2	ENSG00000284685	16:29178183:T:C	0.000334104	0.0153012	0.0145459	0.0142114	0.0146777	16:29178183:T:C-ENSG00000284685.2	-0.30039	-0.294561	-0.295603	-0.295857	-0.295719	0.0903043	0.135514	0.167095	0.136918	0.159505
ENSG00000284707.2	ENSG00000284707	7:97966630:T:C	4.99168e-11	6.90342e-10	1.28786e-14	3.08015e-08	3.57048e-13	7:97966630:T:C-ENSG00000284707.2	-0.619096	-0.619105	-0.619136	-0.619122	-0.619144	0.112089	0.135917	0.105332	0.145148	0.123796
ENSG00000284773.1	ENSG00000284773	1:35003760:A:G	0.0319398	0.0342162	0.0350884	0.0356359	0.0308532	1:35003760:A:G-ENSG00000284773.1	0.388059	0.387547	0.387782	0.387413	0.388676	0.229621	0.292665	0.290643	0.276057	0.276196
ENSG00000284882.2	ENSG00000284882	1:84582958:C:T	8.26942e-06	7.76351e-06	8.35157e-06	3.5728e-05	1.13902e-07	1:84582958:C:T-ENSG00000284882.2	-0.422884	-0.422835	-0.423056	-0.423047	-0.423763	0.139937	0.108321	0.112741	0.132624	0.116699
ENSG00000284930.1	ENSG00000284930	14:73446000:C:CT	0.00131461	0.00114614	0.000528416	0.00100697	0.00146388	14:73446000:C:CT-ENSG00000284930.1	-0.663761	-0.663886	-0.664708	-0.664002	-0.663733	0.318736	0.32925	0.241531	0.270307	0.362969
ENSG00000284931.1	ENSG00000284931	11:5251323:G:GA	0.000320935	0.000291734	0.00029586	0.00024187	0.000282048	11:5251323:G:GA-ENSG00000284931.1	0.463446	0.463539	0.463689	0.463904	0.463771	0.215808	0.158434	0.192566	0.165708	0.216451
ENSG00000285040.1	ENSG00000285040	16:85980849:A:G	0.0192602	0.170872	0.0658906	0.200058	0.147216	16:85980849:A:G-ENSG00000285040.1	0.382193	0.254545	0.323021	0.24163	0.266167	0.209787	0.223822	0.201245	0.263689	0.251561
ENSG00000285080.1	ENSG00000285080	15:43185915:G:C	1.09965e-05	0.000135098	0.000416479	9.07893e-06	2.78405e-06	15:43185915:G:C-ENSG00000285080.1	0.572768	0.572619	0.572502	0.57295	0.573136	0.158015	0.225295	0.217615	0.16883	0.187314
ENSG00000285486.1	ENSG00000285486	17:44297532:G:C	0.0440681	0.0359967	0.0442913	0.0450682	0.0401624	17:44297532:G:C-ENSG00000285486.1	-0.426528	-0.429955	-0.427309	-0.426791	-0.42793	0.327418	0.274277	0.280227	0.396286	0.364755
ENSG00000285534.1	ENSG00000285534	13:109730495:A:G	3.88729e-06	3.14306e-06	1.82401e-06	4.87066e-06	4.89681e-06	13:109730495:A:G-ENSG00000285534.1	0.535131	0.53518	0.535308	0.535241	0.535255	0.166687	0.177442	0.159572	0.160559	0.176562
ENSG00000285589.1	ENSG00000285589	19:12672926:T:C	0.0301682	0.0340157	0.0352094	0.0343692	0.0339446	19:12672926:T:C-ENSG00000285589.1	0.414148	0.41304	0.413208	0.413298	0.413264	0.316895	0.324494	0.304974	0.243955	0.278934
ENSG00000285696.1	ENSG00000285696	11:108153018:T:C	5.76754e-06	1.02827e-07	2.99228e-06	5.29072e-06	1.87253e-05	11:108153018:T:C-ENSG00000285696.1	0.436856	0.437089	0.437134	0.43713	0.437079	0.149427	0.0901208	0.129808	0.146906	0.17453
ENSG00000285851.1	ENSG00000285851	1:84507522:G:A	0.0552373	0.0635106	0.0344392	0.0796238	0.0905049	1:84507522:G:A-ENSG00000285851.1	0.151746	0.14908	0.161455	0.145425	0.142695	0.11645	0.124256	0.0927054	0.113279	0.124443
ENSG00000285884.3	ENSG00000285884	10:42645270:C:T	3.09741e-11	4.05242e-13	1.26248e-08	1.35159e-11	1.69826e-10	10:42645270:C:T-ENSG00000285884.3	0.725266	0.725269	0.725268	0.725273	0.725272	0.148033	0.143739	0.168305	0.154537	0.163641
ENSG00000285932.1	ENSG00000285932	10:99711938:C:T	0.000362739	0.0021778	0.000370728	0.00328053	0.0021612	10:99711938:C:T-ENSG00000285932.1	0.510486	0.507874	0.510592	0.507542	0.508099	0.214764	0.206569	0.167823	0.228897	0.234103
ENSG00000285966.1	ENSG00000285966	14:77039976:T:C	1.18403e-06	9.81865e-06	5.47286e-06	5.05595e-06	2.63718e-05	14:77039976:T:C-ENSG00000285966.1	0.414622	0.414462	0.414687	0.414907	0.414609	0.109007	0.138312	0.118212	0.151431	0.13713
ENSG00000286001.1	ENSG00000286001	5:230996:T:C	9.37028e-14	6.47482e-13	2.77031e-10	8.56761e-11	2.10054e-13	5:230996:T:C-ENSG00000286001.1	-0.780915	-0.780916	-0.780916	-0.780917	-0.780917	0.14864	0.158187	0.16331	0.168266	0.152856
ENSG00000286010.1	ENSG00000286010	8:127647468:A:G	0.00301514	0.000588616	0.00301142	0.00363602	0.00318261	8:127647468:A:G-ENSG00000286010.1	0.331978	0.333756	0.332409	0.332102	0.332241	0.161999	0.121699	0.135259	0.167013	0.137665
ENSG00000286044.1	ENSG00000286044	11:121663814:ATTC:A	0.0148266	0.00644805	0.0155938	0.0154041	0.016076	11:121663814:ATTC:A-ENSG00000286044.1	0.206518	0.209554	0.20698	0.207014	0.206837	0.136913	0.0969534	0.112192	0.100976	0.157999
ENSG00000286127.1	ENSG00000286127	22:21712492:CGAA:C	0.0284108	0.0698324	0.0794014	0.0731705	0.0729497	22:21712492:CGAA:C-ENSG00000286127.1	-0.297195	-0.281874	-0.280275	-0.282399	-0.282532	0.172884	0.213875	0.248161	0.199649	0.226478
ENSG00000286129.1	ENSG00000286129	22:22263874:G:A	1.78272e-22	6.41037e-18	4.82898e-17	7.4452e-15	1.62873e-17	22:22263874:G:A-ENSG00000286129.1	1.01296	1.01296	1.01296	1.01296	1.01296	0.136255	0.176273	0.150723	0.178853	0.150343
ENSG00000286151.1	ENSG00000286151	1:157413511:T:A	0.0414299	0.0385025	0.0441103	0.0428964	0.0411908	1:157413511:T:A-ENSG00000286151.1	0.359486	0.360641	0.359468	0.359714	0.359802	0.263574	0.274488	0.236778	0.273026	0.269773
ENSG00000286162.4	ENSG00000286162	9:5604895:T:A	0.00343735	0.00588108	0.00620617	0.00605535	0.00598533	9:5604895:T:A-ENSG00000286162.4	0.272401	0.2713	0.271763	0.27187	0.271857	0.130163	0.136757	0.152579	0.131307	0.130997
ENSG00000286185.1	ENSG00000286185	1:149382710:A:T	0.000369229	0.000340608	0.000343206	0.000315905	0.000339	1:149382710:A:T-ENSG00000286185.1	0.604709	0.604774	0.604809	0.604867	0.604826	0.257694	0.278746	0.221675	0.226096	0.30359
ENSG00000286207.1	ENSG00000286207	2:152650480:A:C	0.052438	0.052009	0.0543959	0.0490869	0.0381742	2:152650480:A:C-ENSG00000286207.1	-0.238476	-0.239062	-0.238283	-0.240159	-0.242439	0.165064	0.193363	0.186341	0.198492	0.168494
ENSG00000286263.1	ENSG00000286263	1:234955362:T:C	0.0793149	0.0813006	0.0335509	0.0862747	0.0733054	1:234955362:T:C-ENSG00000286263.1	0.211266	0.210913	0.230169	0.209002	0.213042	0.195231	0.190543	0.122549	0.18184	0.182723
ENSG00000286292.2	ENSG00000286292	4:184431864:GA:G	0.0160238	0.567762	0.711261	0.588645	0.655625	4:184431864:GA:G-ENSG00000286292.2	0.329169	-0.0906545	0.000137281	0.0416819	0.035661	0.122904	0.173899	0.177552	0.158023	0.198643
ENSG00000286488.1	ENSG00000286488	15:81308999:G:T	0.0162504	0.0526621	0.0613633	0.0806921	0.0727616	15:81308999:G:T-ENSG00000286488.1	-0.39625	-0.372085	-0.370263	-0.361059	-0.364586	0.20899	0.251003	0.236402	0.274161	0.277101
ENSG00000286507.1	ENSG00000286507	7:26656513:A:G	0.0495434	0.0487578	0.0447112	0.0459372	0.0452521	7:26656513:A:G-ENSG00000286507.1	-0.482707	-0.483249	-0.484781	-0.48378	-0.483599	0.391104	0.390807	0.34178	0.418023	0.430902
ENSG00000286533.1	ENSG00000286533	6:159669699:T:A	5.27748e-08	6.2686e-08	6.69583e-08	6.91411e-08	1.79707e-07	6:159669699:T:A-ENSG00000286533.1	-0.611968	-0.611981	-0.612004	-0.612017	-0.61201	0.151077	0.177788	0.164807	0.179839	0.20029
ENSG00000286619.1	ENSG00000286619	1:205790067:G:A	1.29502e-30	1.32755e-24	7.40802e-31	4.01181e-22	1.94885e-22	1:205790067:G:A-ENSG00000286619.1	1.35152	1.35152	1.35152	1.35152	1.35152	0.150573	0.17403	0.14006	0.186183	0.183068
ENSG00000286656.2	ENSG00000286656	5:43007848:G:A	5.07088e-09	3.19826e-10	2.78074e-08	1.05524e-10	5.48845e-14	5:43007848:G:A-ENSG00000286656.2	0.637119	0.637128	0.637137	0.637152	0.637164	0.154086	0.134618	0.160295	0.133224	0.10886
ENSG00000286691.1	ENSG00000286691	6:110021448:C:T	5.05018e-06	7.49478e-06	5.10652e-06	6.44023e-06	2.27056e-06	6:110021448:C:T-ENSG00000286691.1	0.569196	0.569191	0.56927	0.569279	0.569334	0.19145	0.180981	0.185231	0.190423	0.165974
ENSG00000286760.3	ENSG00000286760	6:166325414:T:A	0.000864505	0.00554207	0.007497	0.00591179	0.00633293	6:166325414:T:A-ENSG00000286760.3	0.443627	0.439649	0.438643	0.439599	0.439261	0.188131	0.21312	0.194391	0.18805	0.183129
ENSG00000286796.1	ENSG00000286796	2:43128624:G:A	0.00637738	0.00601547	0.0053012	0.00107151	0.00688928	2:43128624:G:A-ENSG00000286796.1	0.494303	0.494518	0.495076	0.498914	0.494252	0.261306	0.225882	0.206646	0.186694	0.275324
ENSG00000286809.1	ENSG00000286809	5:39105492:C:T	0.00261161	0.00262781	0.00274859	0.00229782	0.00285552	5:39105492:C:T-ENSG00000286809.1	0.43653	0.436705	0.436751	0.437222	0.436716	0.177971	0.245459	0.205466	0.19341	0.234825
ENSG00000286830.1	ENSG00000286830	7:102784636:T:C	0.0402486	0.0425342	0.0393005	0.0387818	0.0329284	7:102784636:T:C-ENSG00000286830.1	0.394433	0.393889	0.39489	0.394873	0.396509	0.319098	0.279986	0.268229	0.268001	0.29055
ENSG00000286873.1	ENSG00000286873	2:127844192:G:A	0.0492299	0.259726	0.296486	0.271333	0.0384701	2:127844192:G:A-ENSG00000286873.1	0.371992	0.227016	0.198944	0.219582	0.399843	0.284766	0.311967	0.299003	0.3265	0.233858
ENSG00000286883.1	ENSG00000286883	2:74498677:C:T	0.0390569	0.0428447	0.0412078	0.0409049	0.0327352	2:74498677:C:T-ENSG00000286883.1	-0.231513	-0.230606	-0.2313	-0.231462	-0.233563	0.167249	0.193544	0.132532	0.177252	0.185635
ENSG00000286975.1	ENSG00000286975	18:2537768:T:C	0.000439554	0.000450964	0.000438816	0.000417139	0.000384091	18:2537768:T:C-ENSG00000286975.1	0.976183	0.976183	0.976194	0.976205	0.976213	0.450382	0.537502	0.473263	0.435514	0.424684
ENSG00000287064.1	ENSG00000287064	1:154679275:A:T	0.0103111	0.0097334	0.0134291	0.0139405	0.0133849	1:154679275:A:T-ENSG00000287064.1	0.303763	0.304273	0.303593	0.303292	0.303418	0.145248	0.163569	0.193116	0.181965	0.180972
ENSG00000287092.1	ENSG00000287092	6:156384963:A:G	0.0592518	0.0575864	0.0525549	0.0518134	0.0485418	6:156384963:A:G-ENSG00000287092.1	0.229219	0.230109	0.231382	0.231251	0.231571	0.218057	0.173234	0.200753	0.186436	0.160094
ENSG00000287104.2	ENSG00000287104	4:7010131:C:G	0.00283531	8.91916e-05	0.005627	0.00183854	0.00208657	4:7010131:C:G-ENSG00000287104.2	0.450704	0.455269	0.44932	0.452473	0.451221	0.206861	0.146825	0.168037	0.219394	0.153602
ENSG00000287119.1	ENSG00000287119	2:7671301:T:C	0.00335126	0.00474644	0.00440789	0.00442992	0.0043598	2:7671301:T:C-ENSG00000287119.1	0.495567	0.494963	0.49534	0.495328	0.495375	0.217295	0.25134	0.23152	0.253008	0.307151
ENSG00000287126.1	ENSG00000287126	2:3544860:T:C	0.40685	0.369255	0.377806	0.439549	0.00250914	2:3544860:T:C-ENSG00000287126.1	-0.0753192	0.100408	0.160426	0.0817966	-0.555971	0.190216	0.15684	0.181766	0.211899	0.167631
ENSG00000287200.1	ENSG00000287200	12:57435346:C:T	0.0546587	0.0515006	0.0452319	0.0480619	0.0480513	12:57435346:C:T-ENSG00000287200.1	0.160379	0.161831	0.164037	0.162712	0.162165	0.112872	0.124789	0.12741	0.155882	0.125785
ENSG00000287201.1	ENSG00000287201	8:130211558:C:T	1.63257e-07	5.24231e-07	1.57623e-06	1.6409e-06	6.19593e-06	8:130211558:C:T-ENSG00000287201.1	0.933954	0.93395	0.933947	0.933947	0.933944	0.260919	0.307027	0.297695	0.288441	0.291932
ENSG00000287263.3	ENSG00000287263	5:42992166:G:T	5.55112e-15	3.19973e-10	1.16436e-10	4.25482e-12	3.91576e-13	5:42992166:G:T-ENSG00000287263.3	-0.588379	-0.588367	-0.588399	-0.588422	-0.588417	0.095817	0.116712	0.132712	0.135929	0.107492
ENSG00000287265.1	ENSG00000287265	6:310611:G:T	0.0206828	0.0239193	0.0254136	0.0231583	0.0228792	6:310611:G:T-ENSG00000287265.1	0.535993	0.534812	0.534572	0.535412	0.535318	0.345725	0.376254	0.382661	0.317125	0.38786
ENSG00000287510.1	ENSG00000287510	1:30731013:G:A	0.0468146	0.0431543	0.0378406	0.0210597	0.036337	1:30731013:G:A-ENSG00000287510.1	-0.368469	-0.370413	-0.371942	-0.384025	-0.372257	0.292052	0.265685	0.228883	0.229887	0.228913
ENSG00000287574.1	ENSG00000287574	7:44566585:C:T	6.695e-05	5.74129e-05	0.000267143	4.11774e-05	1.99439e-05	7:44566585:C:T-ENSG00000287574.1	0.500516	0.500619	0.500487	0.500883	0.500992	0.170589	0.183556	0.18809	0.166716	0.16434
ENSG00000287733.1	ENSG00000287733	7:135165973:G:A	0	0	0	9.99201e-16	0	7:135165973:G:A-ENSG00000287733.1	-0.725252	-0.725252	-0.725254	-0.725254	-0.725255	0.0937372	0.0968166	0.0856306	0.124885	0.106513
ENSG00000287771.1	ENSG00000287771	2:102008861:CA:C	7.47481e-05	5.86197e-05	0.000147829	0.000253956	2.11037e-05	2:102008861:CA:C-ENSG00000287771.1	0.498667	0.49869	0.498662	0.49858	0.498995	0.259214	0.145644	0.227586	0.176916	0.150542
ENSG00000287778.2	ENSG00000287778	4:11393457:A:G	0.0280192	0.0284741	0.0275789	0.0267399	0.0257538	4:11393457:A:G-ENSG00000287778.2	0.431958	0.432009	0.432388	0.432517	0.43254	0.299702	0.385387	0.371131	0.29025	0.228841
ENSG00000287978.1	ENSG00000287978	1:146345386:G:A	8.36786e-11	2.55782e-10	8.84604e-12	8.09752e-12	1.33227e-13	1:146345386:G:A-ENSG00000287978.1	-0.722036	-0.722037	-0.722041	-0.722043	-0.722045	0.190034	0.179683	0.138138	0.143287	0.137112
ENSG00000288018.3	ENSG00000288018	11:88347379:C:G	0.00032667	0.000341166	0.000282328	0.00105917	0.000563424	11:88347379:C:G-ENSG00000288018.3	0.547135	0.547162	0.547474	0.546744	0.546992	0.223172	0.232175	0.194214	0.252789	0.215579
ENSG00000288046.1	ENSG00000288046	6:6687290:A:C	0.0190371	0.0264308	0.0252921	0.0247372	0.02765	6:6687290:A:C-ENSG00000288046.1	0.408378	0.405615	0.406714	0.406813	0.405639	0.222861	0.285833	0.251923	0.246213	0.314192
ENSG00000288082.1	ENSG00000288082	2:239511890:C:T	0.0110548	0.01177	0.0128075	0.0124385	0.0102283	2:239511890:C:T-ENSG00000288082.1	0.405674	0.40551	0.405406	0.405573	0.406268	0.22335	0.222148	0.236459	0.236536	0.218226
ENSG00000288234.1	ENSG00000288234	9:137257338:T:A	0.0210454	0.0198431	0.0231329	0.0220101	0.0205347	9:137257338:T:A-ENSG00000288234.1	0.681238	0.681825	0.680832	0.681178	0.681461	0.489041	0.410405	0.598646	0.492538	0.553784
ENSG00000288302.3	ENSG00000288302	14:101120447:C:G	0.0105779	0.00949882	0.0100189	0.00402758	0.0103035	14:101120447:C:G-ENSG00000288302.3	0.271233	0.271993	0.271632	0.27574	0.271808	0.173495	0.144304	0.128031	0.119003	0.152971
ENSG00000288398.1	ENSG00000288398	1:16223037:T:C	0.0173644	0.0180031	0.0166627	0.012686	0.0148945	1:16223037:T:C-ENSG00000288398.1	-0.288782	-0.288779	-0.289239	-0.291332	-0.289886	0.183961	0.191288	0.174466	0.152386	0.159766
ENSG00000288538.1	ENSG00000288538	11:78251070:A:G	0.011059	0.0120433	0.0116782	0.00662115	0.0112631	11:78251070:A:G-ENSG00000288538.1	-0.433672	-0.43325	-0.433518	-0.436861	-0.433678	0.256401	0.224441	0.253297	0.202897	0.241956
ENSG00000288598.2	ENSG00000288598	13:41470372:A:G	0.0576475	0.0610365	0.0652068	0.0573495	0.0498889	13:41470372:A:G-ENSG00000288598.2	0.315993	0.315162	0.313793	0.316769	0.318147	0.252028	0.265918	0.317125	0.283609	0.204868
ENSG00000288600.1	ENSG00000288600	13:41466106:G:A	0.00184357	0.000901054	9.9429e-05	0.000932956	0.000857456	13:41466106:G:A-ENSG00000288600.1	0.466438	0.467058	0.468746	0.467219	0.46739	0.205651	0.179895	0.145282	0.175415	0.198587
ENSG00000288612.1	ENSG00000288612	6:3017261:G:A	1.7123e-07	9.73103e-09	1.78306e-07	7.04113e-07	3.65167e-07	6:3017261:G:A-ENSG00000288612.1	-0.7701	-0.770106	-0.770104	-0.770105	-0.770106	0.216572	0.178172	0.205028	0.241494	0.251418
ENSG00000288632.1	ENSG00000288632	16:29597413:T:C	0.0120286	0.0121332	0.0538518	0.0627958	0.0232346	16:29597413:T:C-ENSG00000288632.1	-0.241297	-0.239299	-0.218355	-0.215729	-0.231782	0.14094	0.119067	0.127041	0.147569	0.132885
ENSG00000288670.1	ENSG00000288670	1:161362556:C:G	3.62291e-10	3.85687e-11	1.02929e-08	1.05305e-08	1.51674e-08	1:161362556:C:G-ENSG00000288670.1	-0.949159	-0.949159	-0.949159	-0.949159	-0.949159	0.218784	0.186965	0.286499	0.247964	0.27692
ENSG00000288684.1	ENSG00000288684	9:32505913:A:G	0.0254402	0.284496	0.377473	0.190189	0.133601	9:32505913:A:G-ENSG00000288684.1	-0.445069	0.106	-0.0587245	0.197817	-0.214081	0.181281	0.171506	0.174328	0.200765	0.172036
ENSG00000288703.1	ENSG00000288703	3:46104767:TG:T	0.00294319	0.00314212	0.00290286	0.00272739	0.00255003	3:46104767:TG:T-ENSG00000288703.1	0.364095	0.363999	0.364513	0.364628	0.364713	0.195038	0.165806	0.210294	0.144645	0.180308
ENSG00000288746.2	ENSG00000288746	7:44045532:T:C	9.81924e-05	3.68259e-05	7.32626e-05	6.08034e-05	6.87862e-05	7:44045532:T:C-ENSG00000288746.2	0.435961	0.436347	0.436263	0.436507	0.436427	0.161196	0.135763	0.144883	0.162709	0.183835
ENSG00000288756.2	ENSG00000288756	8:77007028:T:C	2.14192e-05	3.75605e-05	2.63134e-05	2.77507e-05	5.81504e-05	8:77007028:T:C-ENSG00000288756.2	-0.489361	-0.489341	-0.489516	-0.489497	-0.489444	0.154278	0.213269	0.165271	0.145225	0.217446
ENSG00000288757.1	ENSG00000288757	10:123992098:A:G	0.0432537	0.232796	0.298601	0.280287	0.289576	10:123992098:A:G-ENSG00000288757.1	-0.303732	-0.187517	-0.168318	-0.175084	-0.170913	0.210847	0.175791	0.213672	0.250284	0.235742
ENSG00000288762.1	ENSG00000288762	14:76955216:T:TTTTG	0.00126372	0.000632305	0.00132695	0.00115416	0.000818199	14:76955216:T:TTTTG-ENSG00000288762.1	-0.378292	-0.379263	-0.378661	-0.37902	-0.379391	0.152202	0.141499	0.165457	0.186337	0.158413
ENSG00000288771.2	ENSG00000288771	9:68974321:A:G	0.00140898	0.00144427	0.00103695	0.000816007	0.00123056	9:68974321:A:G-ENSG00000288771.2	0.469428	0.46947	0.46993	0.47023	0.469766	0.241643	0.223895	0.188883	0.168314	0.232788
ENSG00000288852.1	ENSG00000288852	11:64200595:CGTGTGTGTG:C	0.0155143	0.0103317	0.0184218	0.0196718	0.0187157	11:64200595:CGTGTGTGTG:C-ENSG00000288852.1	0.538216	0.54146	0.537367	0.536676	0.536846	0.36984	0.250043	0.345546	0.353535	0.351553
ENSG00000288853.1	ENSG00000288853	11:78309464:CT:C	0.0174163	0.017141	0.0125036	0.0136561	0.0154801	11:78309464:CT:C-ENSG00000288853.1	0.201966	0.202472	0.204985	0.204368	0.203326	0.112034	0.120785	0.106461	0.133449	0.154763
ENSG00000288861.1	ENSG00000288861	22:22757988:A:G	1.08588e-06	2.55293e-06	2.12529e-06	1.52111e-06	4.86412e-07	22:22757988:A:G-ENSG00000288861.1	-0.632014	-0.632014	-0.632038	-0.632052	-0.632073	0.188539	0.248603	0.218424	0.187356	0.1623
ENSG00000288882.2	ENSG00000288882	7:142727838:G:A	4.09695e-07	8.70357e-07	3.30548e-07	4.06798e-07	1.38079e-06	7:142727838:G:A-ENSG00000288882.2	-0.49543	-0.49541	-0.495595	-0.495604	-0.495552	0.151848	0.13805	0.135152	0.145628	0.156521
ENSG00000288885.2	ENSG00000288885	21:45556322:T:C	4.24946e-11	8.31527e-09	8.11055e-09	1.20342e-06	4.84347e-08	21:45556322:T:C-ENSG00000288885.2	-0.643746	-0.643737	-0.643752	-0.643743	-0.643755	0.130417	0.142294	0.16798	0.163222	0.177535
ENSG00000288887.2	ENSG00000288887	6:24932314:CTG:C	0.000106663	6.37215e-05	6.51258e-06	3.47659e-08	5.92759e-06	6:24932314:CTG:C-ENSG00000288887.2	0.519165	0.519234	0.519555	0.519986	0.519714	0.161213	0.145138	0.138577	0.12077	0.166491
ENSG00000288891.2	ENSG00000288891	9:41374888:C:A	0.00629776	0.00607046	0.00697986	0.00701401	0.00585428	9:41374888:C:A-ENSG00000288891.2	-0.465578	-0.465767	-0.465612	-0.465618	-0.466026	0.2344	0.21266	0.243743	0.300419	0.258608
ENSG00000288907.2	ENSG00000288907	11:125612450:G:A	0.151666	0.400953	0.482297	0.430283	0.0264864	11:125612450:G:A-ENSG00000288907.2	-0.173623	-0.0985888	-0.0385898	-0.0837298	-0.316541	0.160051	0.173597	0.249893	0.199574	0.159915
ENSG00000288990.2	ENSG00000288990	3:196633457:C:CA	0.458424	0.583215	0.488869	0.514402	0.00122273	3:196633457:C:CA-ENSG00000288990.2	0.121005	0.0413636	0.0879313	-0.0772524	-0.540687	0.234336	0.276315	0.228787	0.233224	0.142374
ENSG00000288997.2	ENSG00000288997	7:149493007:T:C	0.0187429	0.0174432	0.0138102	0.0117865	0.0067747	7:149493007:T:C-ENSG00000288997.2	0.285706	0.286528	0.287472	0.289498	0.290771	0.206821	0.180494	0.14179	0.160424	0.133897
ENSG00000289009.2	ENSG00000289009	21:44893225:C:T	6.07514e-05	5.05141e-05	5.94657e-05	4.7043e-05	3.6829e-05	21:44893225:C:T-ENSG00000289009.2	0.760063	0.760083	0.760084	0.760109	0.760118	0.285574	0.287894	0.315758	0.308328	0.262847
ENSG00000289039.1	ENSG00000289039	10:133014427:G:A	3.34767e-14	1.22586e-12	3.85493e-15	2.7398e-18	6.51872e-16	10:133014427:G:A-ENSG00000289039.1	0.783156	0.783155	0.783156	0.783157	0.783157	0.171491	0.14352	0.116896	0.113879	0.140345
ENSG00000289056.2	ENSG00000289056	5:50684444:G:GA	1.21166e-10	2.27556e-08	3.6018e-09	2.31137e-08	9.79476e-11	5:50684444:G:GA-ENSG00000289056.2	0.863551	0.863551	0.863552	0.863552	0.863553	0.178428	0.260507	0.231189	0.235976	0.18799
ENSG00000289062.2	ENSG00000289062	1:152898240:A:G	0.046028	0.0452349	0.0443514	0.0418084	0.0254681	1:152898240:A:G-ENSG00000289062.2	0.250568	0.251196	0.251284	0.252098	0.256264	0.187684	0.184017	0.197817	0.161436	0.155715
ENSG00000289091.2	ENSG00000289091	2:120247403:A:G	0.000474527	0.000173575	0.000236659	0.000748623	0.00112066	2:120247403:A:G-ENSG00000289091.2	0.390418	0.39122	0.391948	0.390829	0.390551	0.14134	0.115627	0.181206	0.202471	0.182886
ENSG00000289106.2	ENSG00000289106	1:161370744:G:A	0.0450471	0.0681905	0.0820405	0.0745779	0.0780876	1:161370744:G:A-ENSG00000289106.2	-0.429953	-0.417733	-0.413883	-0.417089	-0.415121	0.300319	0.33241	0.485126	0.370372	0.348348
ENSG00000289129.2	ENSG00000289129	2:233151840:C:T	0.079255	0.118198	0.0737113	0.0476424	0.100713	2:233151840:C:T-ENSG00000289129.2	-0.167392	-0.155634	-0.16917	-0.18422	-0.160486	0.140449	0.13796	0.130944	0.136058	0.172129
ENSG00000289137.2	ENSG00000289137	14:99281127:T:C	0.0293171	0.0137195	0.0289357	0.0691788	0.0654527	14:99281127:T:C-ENSG00000289137.2	0.201155	0.215399	0.20819	0.186225	0.187024	0.133939	0.121753	0.128011	0.122687	0.116627
ENSG00000289145.1	ENSG00000289145	8:17225586:T:C	0.000833927	0.000835791	0.000762621	0.00072389	0.000732246	8:17225586:T:C-ENSG00000289145.1	0.820711	0.820723	0.820772	0.820794	0.82077	0.406409	0.409142	0.398279	0.364259	0.377994
ENSG00000289156.2	ENSG00000289156	2:68252539:A:G	1.76372e-13	3.10845e-12	3.93807e-13	1.59742e-12	5.58393e-13	2:68252539:A:G-ENSG00000289156.2	0.758019	0.75802	0.758022	0.758023	0.758023	0.133888	0.152504	0.151303	0.163145	0.166403
ENSG00000289172.2	ENSG00000289172	20:45175549:A:G	0.00214497	0.00239896	0.00214123	0.0019386	0.00130413	20:45175549:A:G-ENSG00000289172.2	-0.578566	-0.578465	-0.578645	-0.578824	-0.579139	0.300997	0.270719	0.294582	0.275323	0.230679
ENSG00000289176.1	ENSG00000289176	2:64300952:A:C	8.71995e-08	7.58684e-09	2.05421e-09	4.16412e-08	2.52417e-09	2:64300952:A:C-ENSG00000289176.1	0.59502	0.595041	0.595077	0.595064	0.595085	0.191307	0.162962	0.134984	0.141583	0.144926
ENSG00000289223.1	ENSG00000289223	11:129856576:C:T	0.440056	0.463272	0.272469	0.00115938	0.319138	11:129856576:C:T-ENSG00000289223.1	0.080284	0.0593463	-0.200485	-0.595948	-0.145504	0.249158	0.228811	0.215265	0.16164	0.18929
ENSG00000289242.1	ENSG00000289242	8:81158650:A:T	0.0207808	0.0292145	0.0277792	0.00250631	0.0267861	8:81158650:A:T-ENSG00000289242.1	-0.280457	-0.277387	-0.278784	-0.299618	-0.279305	0.0987183	0.168203	0.206513	0.152275	0.187568
ENSG00000289268.1	ENSG00000289268	11:61751841:C:A	0.32551	0.379056	0.270954	0.376935	0.0395364	11:61751841:C:A-ENSG00000289268.1	-0.165413	-0.144197	-0.194277	-0.143481	-0.360214	0.253138	0.268531	0.23016	0.253288	0.196988
ENSG00000289292.2	ENSG00000289292	22:40670594:A:C	0.00305901	0.00314519	0.00275205	0.00257233	0.0022492	22:40670594:A:C-ENSG00000289292.2	0.47577	0.475816	0.476107	0.476285	0.476382	0.234627	0.252155	0.220637	0.20816	0.2223
ENSG00000289320.1	ENSG00000289320	4:155987378:CT:C	6.6004e-09	6.76961e-09	3.69501e-09	1.82174e-08	2.34886e-08	4:155987378:CT:C-ENSG00000289320.1	0.551153	0.551175	0.55123	0.551229	0.551221	0.138993	0.146294	0.135032	0.152173	0.138167
ENSG00000289339.2	ENSG00000289339	11:65564802:C:T	0.000100575	1.87642e-07	1.25963e-05	8.38356e-06	5.37217e-05	11:65564802:C:T-ENSG00000289339.2	-0.45752	-0.458158	-0.457993	-0.458223	-0.458013	0.134134	0.10405	0.137368	0.147826	0.184189
ENSG00000289347.1	ENSG00000289347	14:77072765:G:A	0.00650363	0.00573506	0.00138296	0.0031117	0.00332838	14:77072765:G:A-ENSG00000289347.1	-0.488635	-0.489112	-0.493488	-0.490946	-0.490488	0.227608	0.273173	0.187223	0.254854	0.217899
ENSG00000289351.2	ENSG00000289351	3:129237931:C:T	6.78646e-10	4.33236e-08	6.6351e-08	5.02177e-09	9.87468e-09	3:129237931:C:T-ENSG00000289351.2	0.765077	0.765076	0.76508	0.765083	0.765083	0.145431	0.214761	0.234117	0.231078	0.242062
ENSG00000289361.1	ENSG00000289361	4:134876:A:G	0.0247792	0.0224037	0.0225768	0.0241257	0.0229525	4:134876:A:G-ENSG00000289361.1	0.383914	0.385049	0.385375	0.384436	0.384626	0.282614	0.25057	0.221415	0.230004	0.252612
ENSG00000289381.1	ENSG00000289381	13:31796523:C:T	0.00500009	0.00467009	0.00395226	0.00445856	0.00362924	13:31796523:C:T-ENSG00000289381.1	0.375405	0.375819	0.376605	0.376126	0.376539	0.176904	0.196303	0.175598	0.208028	0.177655
ENSG00000289434.2	ENSG00000289434	7:128224825:T:A	0.0436552	0.0586057	0.0924727	0.0832143	0.0721676	7:128224825:T:A-ENSG00000289434.2	-0.205197	-0.199121	-0.191382	-0.194117	-0.19797	0.154048	0.134061	0.152489	0.169585	0.193999
ENSG00000289439.2	ENSG00000289439	1:244325113:G:A	1.42212e-29	1.80703e-23	1.48253e-23	3.35543e-29	9.22083e-24	1:244325113:G:A-ENSG00000289439.2	0.875716	0.875716	0.875716	0.875716	0.875716	0.0904992	0.0974221	0.109319	0.0978877	0.110582
ENSG00000289471.2	ENSG00000289471	19:3168323:C:A	6.40816e-06	1.3849e-05	1.30247e-06	3.45228e-06	2.51274e-05	19:3168323:C:A-ENSG00000289471.2	0.70417	0.704166	0.704229	0.704221	0.704182	0.219847	0.22997	0.177783	0.312965	0.289224
ENSG00000289511.1	ENSG00000289511	21:46668752:CT:C	0.403672	0.0153886	0.387059	0.0485711	0.0628273	21:46668752:CT:C-ENSG00000289511.1	-0.087466	-0.387876	-0.100265	-0.311074	-0.244916	0.213427	0.18334	0.194629	0.202221	0.17447
ENSG00000289514.2	ENSG00000289514	8:41783875:C:T	0.0404988	0.0317571	0.0432382	0.04042	0.0394437	8:41783875:C:T-ENSG00000289514.2	-0.318606	-0.321731	-0.318665	-0.319476	-0.319262	0.244112	0.189366	0.297178	0.205089	0.242548
ENSG00000289520.1	ENSG00000289520	4:176337937:C:G	0.140455	0.0258705	0.123603	0.117672	0.135728	4:176337937:C:G-ENSG00000289520.1	-0.24999	-0.307254	-0.258352	-0.261076	-0.251439	0.25283	0.164893	0.197193	0.202424	0.245696
ENSG00000289584.1	ENSG00000289584	8:23247109:A:G	0.623786	0.690743	0.476454	0.0381785	0.533797	8:23247109:A:G-ENSG00000289584.1	-0.0212884	0.00572217	-0.0728305	-0.382432	0.069397	0.172664	0.190835	0.150884	0.135477	0.152143
ENSG00000289587.2	ENSG00000289587	17:66460307:T:A	0.00360443	0.00371749	0.00406493	0.00400523	0.00429146	17:66460307:T:A-ENSG00000289587.2	-0.426973	-0.427013	-0.427121	-0.427151	-0.426931	0.213439	0.204628	0.207892	0.198997	0.221836
ENSG00000289614.2	ENSG00000289614	1:149199950:T:G	0.00814982	0.00473699	0.00942651	0.00913672	0.00876182	1:149199950:T:G-ENSG00000289614.2	-0.300478	-0.302163	-0.300405	-0.300734	-0.300675	0.172027	0.142639	0.151206	0.167958	0.145634
ENSG00000289621.2	ENSG00000289621	11:58795173:T:C	0.00026383	0.000253375	0.00024447	0.000250026	0.000160264	11:58795173:T:C-ENSG00000289621.2	-0.484097	-0.484186	-0.484306	-0.484342	-0.484471	0.205944	0.203452	0.179524	0.200298	0.165162
ENSG00000289633.1	ENSG00000289633	10:133017184:GTCGCCACGC:G	2.42362e-06	2.52651e-06	2.35069e-06	1.39487e-06	4.83041e-07	10:133017184:GTCGCCACGC:G-ENSG00000289633.1	0.530958	0.530985	0.531047	0.531118	0.531161	0.189061	0.18076	0.163306	0.147878	0.137661
ENSG00000289636.1	ENSG00000289636	10:46130172:G:A	0.00098853	0.000194481	0.00104096	0.00257737	0.000925884	10:46130172:G:A-ENSG00000289636.1	0.402237	0.403538	0.402525	0.401736	0.402838	0.155047	0.132443	0.15892	0.181028	0.17689
ENSG00000289768.1	ENSG00000289768	1:161604838:A:G	0.00109389	0.0014007	0.00185119	0.00176057	0.00150562	1:161604838:A:G-ENSG00000289768.1	0.486301	0.486169	0.486069	0.486162	0.486335	0.184674	0.199275	0.253476	0.237675	0.238626
ENSG00000289810.1	ENSG00000289810	5:71011637:T:C	0.00616512	0.00522602	0.00577423	0.00538315	0.00512653	5:71011637:T:C-ENSG00000289810.1	-0.343727	-0.344558	-0.344448	-0.344834	-0.344741	0.167296	0.170459	0.181692	0.17939	0.178619
ENSG00000289887.1	ENSG00000289887	13:95300183:T:C	0.052045	0.0489633	0.0589078	0.0610061	0.0559928	13:95300183:T:C-ENSG00000289887.1	0.217297	0.218502	0.21703	0.216058	0.217107	0.16838	0.180474	0.172291	0.158867	0.176251
ENSG00000289963.1	ENSG00000289963	22:39045836:A:G	0.0011072	0.00132317	0.00137359	0.00129034	0.00121024	22:39045836:A:G-ENSG00000289963.1	-0.602224	-0.602152	-0.602198	-0.602266	-0.602286	0.225187	0.364092	0.331664	0.293928	0.258484
ENSG00000289976.1	ENSG00000289976	11:11152994:G:A	0.00119666	0.00111135	0.0012034	0.00121342	0.00117361	11:11152994:G:A-ENSG00000289976.1	-0.334233	-0.334568	-0.33477	-0.334945	-0.334868	0.140682	0.134649	0.129465	0.195221	0.173908
ENSG00000290003.1	ENSG00000290003	12:106347989:C:T	1.86425e-06	4.47681e-09	9.37672e-08	1.41107e-11	5.10743e-11	12:106347989:C:T-ENSG00000290003.1	0.745316	0.745324	0.745326	0.745335	0.745334	0.216208	0.18036	0.188042	0.147666	0.1486
ENSG00000290027.1	ENSG00000290027	5:112529826:G:T	0.387148	0.42059	0.28805	0.245674	0.0398044	5:112529826:G:T-ENSG00000290027.1	0.0980481	0.0891763	0.134873	0.154752	0.283895	0.198886	0.168945	0.237963	0.162847	0.163076
ENSG00000290034.1	ENSG00000290034	6:41176920:C:T	0.0261398	0.0311041	0.0334174	0.0321634	0.0321499	6:41176920:C:T-ENSG00000290034.1	-0.30699	-0.305715	-0.305777	-0.306093	-0.306009	0.177663	0.216479	0.210887	0.187654	0.278791
ENSG00000290084.1	ENSG00000290084	7:38305313:T:G	5.84624e-09	3.06184e-07	2.46654e-10	1.079e-10	1.28099e-08	7:38305313:T:G-ENSG00000290084.1	0.533111	0.533081	0.533215	0.533253	0.533221	0.138842	0.134385	0.116589	0.109539	0.139658
ENSG00000290100.1	ENSG00000290100	2:37600271:C:T	7.91589e-14	1.06151e-11	9.82547e-14	3.33067e-16	1.76525e-14	2:37600271:C:T-ENSG00000290100.1	-1.01619	-1.01619	-1.01619	-1.01619	-1.01619	0.171223	0.212096	0.220984	0.188807	0.190102
ENSG00000290124.1	ENSG00000290124	1:247190481:T:C	0.000110885	0.00803434	0.00777266	0.00266695	0.00504068	1:247190481:T:C-ENSG00000290124.1	-0.505124	-0.494653	-0.494901	-0.4992	-0.496356	0.174667	0.20723	0.214206	0.176844	0.200626
ENSG00000290149.1	ENSG00000290149	7:37703467:G:T	0.0155231	0.0401954	0.0422937	0.0408231	0.037851	7:37703467:G:T-ENSG00000290149.1	0.206661	0.199218	0.199544	0.20008	0.201347	0.11428	0.130153	0.131274	0.123135	0.139007
ENSG00000290183.1	ENSG00000290183	16:3300639:A:G	0.00104233	0.000946511	0.00132174	0.00124987	0.00102348	16:3300639:A:G-ENSG00000290183.1	0.341355	0.341536	0.341256	0.341475	0.34178	0.191468	0.137164	0.13966	0.140864	0.145123
ENSG00000290399.1	ENSG00000290399	15:22687901:AATG:A	0.0436703	0.0480642	0.0489596	0.045906	0.0299646	15:22687901:AATG:A-ENSG00000290399.1	0.232678	0.231521	0.23141	0.232557	0.236113	0.186522	0.180865	0.167338	0.197778	0.131774
ENSG00000290535.1	ENSG00000290535	10:38378075:A:G	0.000900117	0.000953272	0.000877623	0.000957286	0.0008045	10:38378075:A:G-ENSG00000290535.1	0.554542	0.554535	0.554703	0.554627	0.55473	0.264828	0.242149	0.223446	0.247647	0.243792
ENSG00000290537.1	ENSG00000290537	12:10575311:G:A	6.05892e-05	1.63882e-05	2.06509e-05	2.00358e-07	4.50479e-05	12:10575311:G:A-ENSG00000290537.1	-0.514441	-0.514598	-0.514663	-0.514981	-0.514653	0.171106	0.147526	0.157469	0.124624	0.16662
ENSG00000290563.1	ENSG00000290563	6:41217736:G:A	1.11022e-16	3.88578e-15	4.33875e-13	5.66214e-15	3.33067e-16	6:41217736:G:A-ENSG00000290563.1	-0.798872	-0.798872	-0.798872	-0.798873	-0.798873	0.107084	0.131043	0.148844	0.146718	0.120744
ENSG00000290569.1	ENSG00000290569	1:120342337:G:A	7.6371e-05	6.62802e-05	3.58433e-05	8.22403e-05	1.81227e-05	1:120342337:G:A-ENSG00000290569.1	-0.534872	-0.534932	-0.535164	-0.535051	-0.535272	0.179939	0.184513	0.177088	0.209196	0.186459
ENSG00000290577.1	ENSG00000290577	13:99408201:G:A	0.00585706	0.00782898	0.00800071	0.00816176	0.00858678	13:99408201:G:A-ENSG00000290577.1	0.239129	0.238284	0.239068	0.238846	0.238491	0.12691	0.124964	0.125777	0.127416	0.128859
ENSG00000290585.1	ENSG00000290585	9:138177286:GC:G	1.36652e-05	1.26831e-05	1.09775e-05	1.27447e-05	4.86065e-06	9:138177286:GC:G-ENSG00000290585.1	0.633795	0.63381	0.633849	0.633848	0.633889	0.249821	0.223743	0.223057	0.196578	0.188226
ENSG00000290588.1	ENSG00000290588	9:138177303:T:G	3.15671e-05	3.54064e-05	2.58514e-05	2.83e-05	1.29883e-05	9:138177303:T:G-ENSG00000290588.1	0.528931	0.528957	0.529109	0.529129	0.52921	0.177697	0.181835	0.187066	0.207012	0.164705
ENSG00000290683.1	ENSG00000290683	1:247187220:C:CAAT	0.804285	0.792139	0.810653	0.807602	0.0229611	1:247187220:C:CAAT-ENSG00000290683.1	-0.0175677	-0.0172925	0.00540729	0.00882051	0.552565	0.22146	0.219664	0.200817	0.233098	0.187611
ENSG00000290698.1	ENSG00000290698	17:16937316:TA:T	0.000457529	0.000326155	6.4401e-05	9.66378e-05	0.000131516	17:16937316:TA:T-ENSG00000290698.1	0.468672	0.468826	0.469468	0.469339	0.469253	0.217374	0.207788	0.13854	0.154887	0.191616
ENSG00000290762.1	ENSG00000290762	3:195979009:C:T	0.0126722	0.0170698	0.0188475	0.0201514	0.0198824	3:195979009:C:T-ENSG00000290762.1	0.486141	0.484406	0.484499	0.483711	0.483745	0.230696	0.339018	0.348656	0.320399	0.294596
ENSG00000290818.1	ENSG00000290818	7:144300739:TTGATAGTGA:T	0.00761091	0.00741626	0.00853803	0.00866337	0.00805957	7:144300739:TTGATAGTGA:T-ENSG00000290818.1	0.484788	0.484946	0.484828	0.48474	0.484893	0.241605	0.229856	0.287424	0.291898	0.298581
ENSG00000290854.1	ENSG00000290854	1:1704835:C:T	0.0328147	0.0255243	0.0218536	0.0297574	0.0290105	1:1704835:C:T-ENSG00000290854.1	-0.305317	-0.30873	-0.312163	-0.30682	-0.306755	0.236313	0.177566	0.185884	0.221122	0.189005
ENSG00000290876.1	ENSG00000290876	15:30479958:A:G	0.000137822	0.000144649	0.000158989	0.000134118	0.000135152	15:30479958:A:G-ENSG00000290876.1	0.86909	0.869089	0.869087	0.869111	0.869104	0.407551	0.378464	0.37073	0.326203	0.359788
ENSG00000290927.1	ENSG00000290927	16:31711631:A:T	1.86484e-11	7.77156e-16	0	0	4.77396e-15	16:31711631:A:T-ENSG00000290927.1	-0.710052	-0.710055	-0.71006	-0.710062	-0.710061	0.130874	0.104541	0.0974936	0.0932754	0.130438
ENSG00000290928.1	ENSG00000290928	17:30745654:T:G	0.0466581	0.0452109	0.0426699	0.0323767	0.0365861	17:30745654:T:G-ENSG00000290928.1	-0.343455	-0.344386	-0.34463	-0.349371	-0.346449	0.298838	0.258115	0.321569	0.198348	0.232285
ENSG00000290981.1	ENSG00000290981	22:20642932:AT:A	0.0109247	0.0109068	0.0090553	0.00739771	0.00867066	22:20642932:AT:A-ENSG00000290981.1	0.301904	0.302208	0.303064	0.304106	0.303167	0.172629	0.188907	0.165857	0.140282	0.16925
ENSG00000290993.1	ENSG00000290993	3:129389315:A:AG	0.141789	0.0982648	0.0153256	0.179472	0.117088	3:129389315:A:AG-ENSG00000290993.1	0.229703	0.246392	0.33286	0.215686	0.242406	0.216195	0.146044	0.162694	0.187325	0.252121
ENSG00000291037.1	ENSG00000291037	7:5136773:C:G	4.42826e-11	7.31812e-10	1.4728e-09	3.67531e-10	4.02047e-09	7:5136773:C:G-ENSG00000291037.1	0.593143	0.593138	0.593164	0.593183	0.593176	0.12782	0.126342	0.143066	0.147606	0.158795
ENSG00000291046.1	ENSG00000291046	13:21344705:G:A	0.0273911	0.0293743	0.0290812	0.031712	0.0317581	13:21344705:G:A-ENSG00000291046.1	-0.322229	-0.321785	-0.322919	-0.321534	-0.321366	0.185569	0.214283	0.201628	0.229836	0.284048
ENSG00000291048.1	ENSG00000291048	8:8230708:T:C	0.00264394	0.364485	0.357277	0.369559	0.346424	8:8230708:T:C-ENSG00000291048.1	0.328627	0.151313	0.156962	0.150951	0.158155	0.129899	0.135538	0.176022	0.152894	0.114805
ENSG00000291055.1	ENSG00000291055	5:1562946:T:C	0.037006	0.0365066	0.0360262	0.0348302	0.0293365	5:1562946:T:C-ENSG00000291055.1	0.275763	0.276149	0.276508	0.276874	0.27816	0.190817	0.163276	0.191893	0.209828	0.228795
ENSG00000291068.1	ENSG00000291068	1:223951584:C:T	6.55707e-08	3.1338e-08	3.85811e-08	9.23673e-08	7.18885e-08	1:223951584:C:T-ENSG00000291068.1	-0.538503	-0.53853	-0.538574	-0.53856	-0.538571	0.193998	0.147547	0.151083	0.13068	0.135662
ENSG00000291077.1	ENSG00000291077	1:16229387:C:T	0.000334497	0.000204838	0.000336588	0.000156469	0.000244207	1:16229387:C:T-ENSG00000291077.1	0.407824	0.408109	0.408097	0.408649	0.408292	0.206993	0.133398	0.194426	0.136971	0.161733
ENSG00000291099.1	ENSG00000291099	7:5856418:G:T	0.0434347	0.700157	0.640621	0.557959	0.635039	7:5856418:G:T-ENSG00000291099.1	0.290481	0.0115236	0.0337237	0.0630534	0.0405433	0.146822	0.156917	0.205024	0.16327	0.19905
ENSG00000291101.1	ENSG00000291101	19:12233252:A:G	0.0940244	0.0867592	0.0843396	0.0446963	0.0812979	19:12233252:A:G-ENSG00000291101.1	-0.255174	-0.258245	-0.258165	-0.276971	-0.25864	0.245322	0.20752	0.301204	0.162155	0.264247
ENSG00000291131.1	ENSG00000291131	19:53211614:C:G	5.38276e-05	6.36525e-05	7.17863e-05	8.46027e-05	7.35074e-05	19:53211614:C:G-ENSG00000291131.1	-0.349486	-0.349354	-0.349879	-0.349791	-0.349936	0.118694	0.100319	0.138305	0.153435	0.168317
ENSG00000291138.1	ENSG00000291138	1:46417878:A:G	0.0325634	0.0320448	0.0258997	0.0326527	0.0311325	1:46417878:A:G-ENSG00000291138.1	-0.336851	-0.337311	-0.340318	-0.336953	-0.337349	0.265015	0.267742	0.176465	0.219354	0.248987
ENSG00000291143.1	ENSG00000291143	11:6746378:G:A	0.0026892	0.00880312	0.010466	0.0136951	0.00963957	11:6746378:G:A-ENSG00000291143.1	-0.281533	-0.278692	-0.278111	-0.276889	-0.278557	0.127241	0.160484	0.135755	0.159054	0.118104
ENSG00000291144.1	ENSG00000291144	11:4394036:A:C	2.47788e-08	1.19145e-09	5.42463e-12	3.85189e-09	7.61219e-12	11:4394036:A:C-ENSG00000291144.1	0.48882	0.488913	0.489065	0.489055	0.489135	0.115329	0.109785	0.089821	0.121216	0.10395
ENSG00000291147.1	ENSG00000291147	2:242135493:A:G	0.000128564	0.000143077	0.000174348	0.000168189	0.000155562	2:242135493:A:G-ENSG00000291147.1	0.477205	0.477248	0.477276	0.477334	0.477341	0.171695	0.201913	0.194623	0.184483	0.165396
ENSG00000291159.1	ENSG00000291159	15:84639555:G:T	1.43626e-08	9.47142e-08	7.01568e-09	5.23313e-09	4.86989e-08	15:84639555:G:T-ENSG00000291159.1	0.891172	0.891172	0.891174	0.891174	0.891174	0.260159	0.270705	0.232953	0.202346	0.290402
ENSG00000291186.1	ENSG00000291186	11:71800823:C:T	1.37058e-05	8.95742e-06	2.07643e-05	1.63097e-05	1.72457e-05	11:71800823:C:T-ENSG00000291186.1	-0.460663	-0.460772	-0.460777	-0.460899	-0.460846	0.154864	0.125099	0.176715	0.184852	0.156859
ENSG00000291201.1	ENSG00000291201	4:118634132:T:C	1.1212e-07	5.71442e-08	2.05356e-09	8.78636e-09	7.06336e-08	4:118634132:T:C-ENSG00000291201.1	-0.487744	-0.487775	-0.487948	-0.487849	-0.487901	0.167325	0.143252	0.115615	0.096214	0.140622
ENSG00000291202.1	ENSG00000291202	4:119407129:G:A	5.75764e-13	4.36625e-16	6.73535e-13	5.34643e-21	1.50109e-14	4:119407129:G:A-ENSG00000291202.1	0.833667	0.833667	0.833667	0.833667	0.833667	0.176797	0.143997	0.155645	0.106134	0.149873
ENSG00000291203.1	ENSG00000291203	4:119481467:T:C	0.0059369	0.00491658	0.000769525	0.0027147	0.00318907	4:119481467:T:C-ENSG00000291203.1	-0.466702	-0.467213	-0.471662	-0.468799	-0.468446	0.235794	0.216233	0.165217	0.20046	0.230981
ENSG00000291207.1	ENSG00000291207	7:45792365:G:A	0.00517336	0.00999462	0.0102832	0.0105148	0.0115731	7:45792365:G:A-ENSG00000291207.1	0.537667	0.534964	0.535355	0.535186	0.534623	0.243976	0.251242	0.327157	0.371935	0.324022
ENSG00000291208.1	ENSG00000291208	7:45724316:A:G	0.00653622	0.00635062	0.00714495	0.00652596	0.00702446	7:45724316:A:G-ENSG00000291208.1	-0.639827	-0.639959	-0.63975	-0.640017	-0.639698	0.395312	0.329711	0.409314	0.305351	0.428708
ENSG00000291214.1	ENSG00000291214	17:68146575:T:G	0.00501081	0.00239569	0.0036435	0.00437819	0.00541496	17:68146575:T:G-ENSG00000291214.1	0.272155	0.274103	0.273706	0.27316	0.272653	0.153272	0.119649	0.105484	0.142049	0.171677
ENSG00000054179.12	ENTPD2	9:137103267:A:G	1.25061e-07	4.09544e-08	5.59345e-08	2.7042e-07	1.12467e-07	9:137103267:A:G-ENSG00000054179.12	-0.598801	-0.598824	-0.59886	-0.598851	-0.598861	0.171678	0.137444	0.185231	0.17945	0.182697
ENSG00000223797.8	ENTPD3-AS1	3:40466515:C:CAA	9.75619e-06	6.63007e-08	1.8491e-05	6.71298e-06	6.35028e-05	3:40466515:C:CAA-ENSG00000223797.8	-0.507158	-0.507373	-0.507252	-0.507303	-0.507203	0.154495	0.117251	0.187854	0.130814	0.165328
ENSG00000197217.13	ENTPD4	8:23432023:G:A	0.032606	1.81682e-05	0.0599189	0.340419	0.126538	8:23432023:G:A-ENSG00000197217.13	-0.297718	-0.463779	-0.229651	-0.135417	-0.21388	0.116556	0.112936	0.105603	0.14112	0.162269
ENSG00000159023.23	EPB41	1:28921975:G:GT	0.0365631	0.0258345	0.0359526	0.0349977	0.0311303	1:28921975:G:GT-ENSG00000159023.23	0.135154	0.137765	0.136434	0.136703	0.137166	0.130073	0.0650542	0.113317	0.110939	0.115305
ENSG00000224032.9	EPB41L4A-AS1	5:112146715:G:T	0.036698	0.0378555	0.0397164	0.0321816	0.0352398	5:112146715:G:T-ENSG00000224032.9	0.446054	0.445784	0.445099	0.448719	0.44647	0.322954	0.281692	0.391631	0.28739	0.390928
ENSG00000152223.16	EPG5	18:46007608:A:G	0.0347124	0.103573	0.12262	0.11143	0.114118	18:46007608:A:G-ENSG00000152223.16	0.154354	0.135203	0.132506	0.13578	0.134736	0.110944	0.111903	0.0979853	0.115983	0.114176
ENSG00000229153.7	EPHA1-AS1	7:143386568:A:C	1.16351e-08	1.08297e-08	1.31879e-08	5.57257e-09	1.0871e-08	7:143386568:A:C-ENSG00000229153.7	0.592784	0.5928	0.592821	0.592851	0.592838	0.158395	0.16834	0.150029	0.151558	0.149178
ENSG00000154928.19	EPHB1	3:134839059:G:A	0.0414975	0.0396323	0.0297078	0.0323626	0.0329883	3:134839059:G:A-ENSG00000154928.19	0.186348	0.18731	0.19019	0.188633	0.188444	0.199442	0.147191	0.118704	0.108802	0.141917
ENSG00000196411.10	EPHB4	7:100812975:G:A	7.57795e-10	5.98433e-13	8.35042e-11	6.69643e-10	3.74669e-09	7:100812975:G:A-ENSG00000196411.10	0.621547	0.621558	0.621567	0.621569	0.621569	0.165742	0.10572	0.140358	0.13829	0.160863
ENSG00000120915.14	EPHX2	8:27508884:G:C	8.1855e-06	3.77759e-06	4.26111e-06	4.10105e-06	3.37189e-06	8:27508884:G:C-ENSG00000120915.14	0.406012	0.406447	0.4066	0.406706	0.406706	0.117006	0.136305	0.136007	0.134084	0.125192
ENSG00000178567.8	EPM2AIP1	3:36979158:T:C	0.00868543	0.00923229	0.00868771	0.00787499	0.00938121	3:36979158:T:C-ENSG00000178567.8	0.420603	0.420514	0.420988	0.421522	0.420542	0.209606	0.252349	0.219128	0.234889	0.23114
ENSG00000063245.15	EPN1	19:55637023:G:A	0.00501227	0.00495054	0.00541606	0.00548921	6.33271e-05	19:55637023:G:A-ENSG00000063245.15	-0.183878	-0.183458	-0.183344	-0.184214	-0.188067	0.0803018	0.059768	0.0722249	0.0947234	0.0633609
ENSG00000261150.3	EPPK1	8:143910115:T:C	0.0153103	0.0152785	0.0159108	0.0158326	0.0145727	8:143910115:T:C-ENSG00000261150.3	-0.500885	-0.500999	-0.500993	-0.500954	-0.501208	0.336238	0.32643	0.283501	0.301512	0.288294
ENSG00000085832.18	EPS15	1:51500016:T:G	0.0339927	0.0225466	0.0389763	0.0352014	0.0346331	1:51500016:T:G-ENSG00000085832.18	-0.332166	-0.337677	-0.331185	-0.332682	-0.332185	0.247945	0.215715	0.231383	0.219379	0.190388
ENSG00000131037.15	EPS8L1	19:55103555:T:C	0.00815665	0.00566469	0.00316802	0.00556287	0.00396764	19:55103555:T:C-ENSG00000131037.15	-0.295058	-0.296249	-0.299051	-0.296748	-0.297971	0.178935	0.130814	0.126569	0.159694	0.151077
ENSG00000177106.17	EPS8L2	11:705535:C:T	0.0180848	0.0180121	0.0179809	0.0132791	0.0156518	11:705535:C:T-ENSG00000177106.17	-0.42202	-0.422215	-0.422169	-0.4246	-0.42308	0.263338	0.243219	0.284595	0.202154	0.329044
ENSG00000133106.15	EPSTI1	13:42981922:C:T	0.0134212	8.25837e-05	0.0143771	0.0524447	0.0265877	13:42981922:C:T-ENSG00000133106.15	0.254163	0.26682	0.25581	0.239831	0.24774	0.0968742	0.0756419	0.122038	0.118019	0.12716
ENSG00000164307.13	ERAP1	5:96793809:A:G	2.22045e-16	1.23168e-12	5.82423e-13	2.53131e-14	1.39435e-11	5:96793809:A:G-ENSG00000164307.13	-0.641795	-0.64179	-0.641801	-0.641805	-0.641804	0.10981	0.107945	0.124449	0.10659	0.134543
ENSG00000164308.17	ERAP2	5:96909639:C:T	0	0	0	0	0	5:96909639:C:T-ENSG00000164308.17	-0.865517	-0.865517	-0.865517	-0.865517	-0.865517	0.086912	0.0964466	0.0977659	0.112257	0.102633
ENSG00000012061.16	ERCC1	19:45475432:T:G	0.635017	0.0269247	0.655957	0.652639	0.590642	19:45475432:T:G-ENSG00000012061.16	-0.0420836	-0.251209	-0.0417162	-0.0421985	-0.052024	0.148112	0.110589	0.144314	0.128012	0.132443
ENSG00000163161.14	ERCC3	2:127324570:A:G	6.91497e-06	9.91982e-06	1.47747e-06	8.5048e-06	2.40769e-06	2:127324570:A:G-ENSG00000163161.14	0.726107	0.726108	0.726144	0.726125	0.72614	0.309623	0.291619	0.177984	0.258973	0.230797
ENSG00000175611.14	ERCC6L2-AS1	9:95875148:C:T	5.55201e-08	9.71704e-09	4.27279e-08	5.38826e-09	5.96468e-09	9:95875148:C:T-ENSG00000175611.14	0.838911	0.838913	0.838914	0.838917	0.838916	0.227519	0.255992	0.216507	0.219738	0.221934
ENSG00000049167.16	ERCC8	5:60945315:G:A	0.0192816	0.381571	0.359422	0.318057	0.453453	5:60945315:G:A-ENSG00000049167.16	-0.224639	-0.0945206	-0.102685	-0.124183	-0.0755199	0.101366	0.137426	0.127236	0.144211	0.155525
ENSG00000268041.3	ERFL	19:41912089:A:C	0.0372939	0.042962	0.0429365	0.0444282	0.0384635	19:41912089:A:C-ENSG00000268041.3	0.274591	0.273174	0.273914	0.273274	0.274775	0.17353	0.233442	0.186558	0.236328	0.188771
ENSG00000087502.19	ERGIC2	12:29338595:A:G	0.00361274	0.0817371	3.31972e-05	1.25734e-06	6.73062e-05	12:29338595:A:G-ENSG00000087502.19	-0.400976	-0.365579	-0.415963	-0.420728	-0.4193	0.146597	0.158672	0.1226	0.0985852	0.146837
ENSG00000125991.21	ERGIC3	20:35559009:T:C	0.00240911	0.00253053	0.00195534	0.00259783	0.000571383	20:35559009:T:C-ENSG00000125991.21	-0.229062	-0.228676	-0.230311	-0.228905	-0.231554	0.13337	0.100506	0.0877707	0.092874	0.098323
ENSG00000104714.14	ERICH1	8:692842:G:A	2.45104e-05	2.26475e-05	2.68434e-05	3.70179e-05	2.48524e-05	8:692842:G:A-ENSG00000104714.14	-0.782968	-0.782977	-0.78298	-0.782972	-0.782984	0.283143	0.277695	0.277968	0.331041	0.292503
ENSG00000130023.16	ERMARD	6:169708321:C:G	0.679537	0.615958	0.049095	0.601411	0.575044	6:169708321:C:G-ENSG00000130023.16	0.00208316	0.0256289	0.280588	0.0274296	0.0354926	0.184677	0.163302	0.117764	0.17323	0.230064
ENSG00000099219.15	ERMP1	9:5904218:T:C	1.89959e-05	2.31245e-05	1.52614e-05	1.40114e-05	9.25607e-06	9:5904218:T:C-ENSG00000099219.15	-0.517205	-0.517263	-0.517373	-0.517469	-0.517509	0.160971	0.216772	0.154886	0.183876	0.177661
ENSG00000197930.13	ERO1A	14:52745550:G:A	0.00327621	0.00313861	0.00306554	0.00282142	0.00142166	14:52745550:G:A-ENSG00000197930.13	0.300234	0.300588	0.300683	0.301199	0.301929	0.163485	0.157419	0.133404	0.129446	0.12135
ENSG00000086619.15	ERO1B	1:236263317:C:T	0.0297435	0.0297926	0.0280015	0.0288447	0.0278513	1:236263317:C:T-ENSG00000086619.15	0.367373	0.367545	0.368517	0.367889	0.367959	0.278815	0.235291	0.261348	0.247023	0.223997
ENSG00000139055.7	ERP27	12:14913944:T:G	0.0275663	0.02026	0.010488	0.0174882	0.0199904	12:14913944:T:G-ENSG00000139055.7	0.215303	0.218799	0.223438	0.220074	0.218533	0.118422	0.153431	0.10209	0.163378	0.154285
ENSG00000260565.9	ERVK13-1	16:2661864:C:T	2.96044e-05	1.28415e-05	2.30284e-05	7.97936e-06	9.0099e-06	16:2661864:C:T-ENSG00000260565.9	-0.521572	-0.521655	-0.521703	-0.52188	-0.521812	0.214576	0.164192	0.195914	0.167433	0.151559
ENSG00000142396.11	ERVK3-1	19:58315168:A:G	0.00025573	0.000205914	0.000209553	0.000185005	0.000133902	19:58315168:A:G-ENSG00000142396.11	0.51126	0.511392	0.51144	0.511573	0.511642	0.230488	0.20686	0.18021	0.189045	0.190805
ENSG00000139684.15	ESD	13:46796407:A:G	0.0120616	0.0110492	0.0115212	0.0113424	0.0104409	13:46796407:A:G-ENSG00000139684.15	0.356517	0.357122	0.357175	0.357223	0.357284	0.243976	0.206931	0.219907	0.2189	0.159399
ENSG00000187017.18	ESPN	1:6433403:T:C	3.12877e-09	4.55873e-09	7.3246e-08	2.52906e-08	2.96217e-08	1:6433403:T:C-ENSG00000187017.18	0.644487	0.644491	0.644498	0.644507	0.644506	0.155549	0.145885	0.194962	0.186383	0.176314
ENSG00000265992.1	ESRG	3:54607541:G:A	5.11136e-05	0.000218375	0.000179296	7.93043e-05	6.9067e-05	3:54607541:G:A-ENSG00000265992.1	0.548345	0.548106	0.548196	0.548369	0.548386	0.206346	0.228211	0.216913	0.188356	0.175917
ENSG00000173153.17	ESRRA	11:64329761:A:G	0.0343452	0.0401538	0.0401826	0.036228	0.00605164	11:64329761:A:G-ENSG00000173153.17	-0.153971	-0.152341	-0.152733	-0.154104	-0.16102	0.0848769	0.101824	0.110143	0.0906343	0.071155
ENSG00000100056.12	ESS2	22:19106814:A:T	0.0611077	0.0511371	0.0528359	0.0616596	0.00292046	22:19106814:A:T-ENSG00000100056.12	0.174699	0.178832	0.177792	0.174753	0.192285	0.129727	0.10123	0.0956463	0.0927395	0.0801601
ENSG00000117868.18	ESYT2	7:158784586:G:C	5.99825e-05	1.42306e-05	0.000118802	4.88974e-05	5.52151e-05	7:158784586:G:C-ENSG00000117868.18	0.261319	0.262159	0.260407	0.262552	0.262444	0.111379	0.0754362	0.0735398	0.106455	0.125946
ENSG00000140374.17	ETFA	15:76342964:C:G	0.00549292	0.00773882	0.00361299	9.50028e-06	0.00363661	15:76342964:C:G-ENSG00000140374.17	0.461925	0.460648	0.463888	0.471056	0.46375	0.191104	0.163252	0.161894	0.135353	0.152486
ENSG00000205707.11	ETFRF1	12:25182034:ATT:A	0.0179309	0.0221651	0.0124446	0.018357	0.0168895	12:25182034:ATT:A-ENSG00000205707.11	-0.536571	-0.534565	-0.541556	-0.536183	-0.536915	0.364446	0.358893	0.267651	0.336568	0.348255
ENSG00000010030.14	ETV7	6:36387595:T:C	4.05523e-08	4.97126e-11	6.31493e-08	8.04381e-08	5.10369e-10	6:36387595:T:C-ENSG00000010030.14	0.527347	0.527474	0.527463	0.527497	0.527556	0.112369	0.10513	0.136617	0.142765	0.127262
ENSG00000142694.7	EVA1B	1:36349891:G:A	0.0732611	0.0538199	0.0212622	0.0289046	0.011589	1:36349891:G:A-ENSG00000142694.7	-0.19289	-0.199108	-0.219907	-0.207924	-0.22736	0.134619	0.122191	0.119529	0.122744	0.147242
ENSG00000166979.13	EVA1C	21:32432282:G:A	0.00343515	0.00375997	0.00462586	0.00410931	0.00463034	21:32432282:G:A-ENSG00000166979.13	-0.355084	-0.355158	-0.355035	-0.355567	-0.354948	0.143054	0.182801	0.225077	0.207272	0.162788
ENSG00000185862.7	EVI2B	17:31313661:G:A	0.00776589	0.0131007	0.00500651	0.00203085	0.00964965	17:31313661:G:A-ENSG00000185862.7	0.166675	0.164785	0.167625	0.170039	0.166287	0.121164	0.108602	0.0700796	0.0636295	0.0981777
ENSG00000142459.9	EVI5L	19:7860250:C:G	0.56607	0.539842	0.539073	0.506143	0.0351314	19:7860250:C:G-ENSG00000142459.9	0.0368408	0.0430761	0.0413563	0.0471051	0.143242	0.13832	0.0919478	0.0949388	0.0798866	0.0749833
[truncated: 3,362 more rows]

## Sheet: Table S19
Table S19: Response eQTLs identifited in the comparison of posterior effect sizes from T0 versus T1
[truncated: 258 more rows]

[truncated: 13 more sheets: Table S20, Table S21, Table S22, Table S23, Table S24, Table S25, Table S26, Table S27, Table S28, Table S29, Table S30, Table S31, Table S32]
